# Supplementary material for: Exploring Drugs and Vaccines Associated with Altered Risks and Severity of COVID-19: A UK Biobank Cohort Study of All ATC Level-4 Drug Categories Reveals Repositioning Opportunities
Source: Pharmaceutics. 2021 Sep 18;13(9):1514. doi: 10.3390/pharmaceutics13091514 (PMC8471264; doi:10.3390/pharmaceutics13091514)
Supplement: Supplementary file 1 [file pharmaceutics-13-01514-s001.zip]

Archive with 17 entries (17 files):
- Fig S1 xgboost_Pr(tested)_top15Variables_withLargest_abs_ShapleyValue.pdf
- Summary of supplementary information.pdf
- Table S1 Summary of distribution of covariates with GP avaliable updated.xlsx
- Table S2 OOB error of imputation updated.xlsx
- Table S3  All protective associations (p less than 0.05) updated11Jan.xlsx
- Table S4 all vaccine associations updated11Jan.xlsx
- Table S5 top 10 drugs harmful association for each time-window and model updated11Jan.xlsx
- Table S6 all results across models and time-windows.xlsx
- TableS10_proportion of subjects in each subgroup.xlsx
- TableS11-Full_results_subgroup_analysis_selected18Drugs-fdr_12Jan.xlsx
- TableS12_Summary_interaction-analysis_resultsFDRlessThan0.2.xlsx
- TableS13_Full_results_interaction_analyses-fdr.xlsx
- TableS14_Flu_vaccine_effect_by_season.xlsx
- TableS15_Results_controlling_for_other_drugs_rm10yrs.xlsx
- TableS7-CompleteCovar-GP-available-IPW-rm_vaccine-p6m-rm-epv (1).xlsx
- TableS8-CompleteCovar-GP-available-no-IPW-int-rm-all-vaccine-p6m-rm-epv.xlsx
- TableS9-Multiple-imputation-on-covariates-GP-available-no-IPW-int-rm-vaccine-p6m-rm-epv.xlsx
