# Supplementary material for: Exploring Drugs and Vaccines Associated with Altered Risks and Severity of COVID-19: A UK Biobank Cohort Study of All ATC Level-4 Drug Categories Reveals Repositioning Opportunities
Source: Pharmaceutics. 2021 Sep 18;13(9):1514. doi: 10.3390/pharmaceutics13091514 (PMC8471264; doi:10.3390/pharmaceutics13091514)
Supplement: Supplementary file 1 [file pharmaceutics-13-01514-s001.zip › Table S1 Summary of distribution of covariates with GP avaliable updated.xlsx]

## Sheet: Sheet1
Table S1 A summary of the demographic and covariate data of the UKBB dataset with GP avaliable
Variables	Mean (SD) or Count (%)	Missing rate
Age (years)	68.1 (8.1)	0
Male (%)	177,441 (44.70%)	0
Ethnicity		0.0018
White (%)	371319 (93.53%)
Mixed (%)	2409 (0.61%)
Asian or Asian British (%)	8568 (2.16%)
Black or Black British (%)	6993 (1.76%)
Chinese (%)	1277 (0.32%)
Other ethnic group (%)	5726 (1.44%)
BMI (kg/m2)	27.37 (4.77)	0.0055
Outcome		0
Severe	1,215 (0.29%)
Mild	2,686 (0.64%)
Death	170 (0.04%)
Test-negative	26,977 (6.80%)
Other Unaffected	393,142 (99.02%)
Hypertension	131,180 (33.04%)	0
Diabetes	28,287 (7.13%)	0
Coronary artery disease	31,258 (7.87%)	0
History of Cancer	30,443 (7.67%)	0
COPD	13,286 (3.35%)	0
Asthma	56,111 (14.13%)	0
Depression	33,165 (8.35%)	0
Cognitive_impairment	888 (0.24%)	0
Smoking status		0.0059
Never	220,681 (55.59%)
Previous	136,399 (34.36%)
Current	37,591 (9.47%)
Blood Urea ( mmol/L)	5.39 (1.35)	0.0658
Blood Creatinine (umol/L)	72.19 (16.96)	0.0656
Townsend index	-1.34 (3.05)	0.0012
No. non-cancer illness	1.98 (2.05)	0.0016
No. medication	2.35 (2.55)	0.0016
We excluded subjects with any cause of mortality before 31 Jan 2020 (the date of the first case of infection)
(N = 397000).
