# Supplementary material for: Exploring Drugs and Vaccines Associated with Altered Risks and Severity of COVID-19: A UK Biobank Cohort Study of All ATC Level-4 Drug Categories Reveals Repositioning Opportunities
Source: Pharmaceutics. 2021 Sep 18;13(9):1514. doi: 10.3390/pharmaceutics13091514 (PMC8471264; doi:10.3390/pharmaceutics13091514)
Supplement: Supplementary file 1 [file pharmaceutics-13-01514-s001.zip › Table S2 OOB error of imputation updated.xlsx]

## Sheet: OOB info
Table S2: Out-of-bag (OOB) errors for different variables from multiple imputations
Imputed variables			Multiple imp
			Imp-1	Imp-2	Imp-3	Imp-4	Imp-5	Imp-6	Imp-7	Imp-8	Imp-9	Imp-10	mean
townsend			0.004	0.0043	0.0035	0.0038	0.0041	0.0042	0.0036	0.004	0.004	0.0035	0.0039
cnt_noncancer			0.0135	0.0135	0.0153	0.0136	0.0145	0.0126	0.0125	0.0141	0.0139	0.0136	0.0137
cnt_treatment			0.0071	0.0078	0.008	0.0084	0.0076	0.0073	0.0076	0.0076	0.0083	0.0084	0.0078
ethnic			0.0002	0.0002	0.0002	0.0003	0.0002	0.0001	0.0003	0.0001	0.0002	0.0002	0.0002
past diagnosis of cancer			0	0	0	0	0	0	0	0	0	0	0
bmi			0.0102	0.0096	0.0108	0.0098	0.0096	0.0101	0.0104	0.009	0.0096	0.0092	0.0098
smoking status			0	0	0	0	0	0	0	0	0	0	0
creatinine			0.0385	0.0421	0.0413	0.0388	0.0382	0.039	0.0396	0.0387	0.04	0.0399	0.0396
urea			0.0102	0.0115	0.0113	0.0134	0.0124	0.0112	0.0111	0.0113	0.0118	0.0111	0.0115
imp: Imputation
The normalized root mean square error was computed for continuous variable, and the proportion of falsely classified was computed for categorical variables. Please refer to https://www.rdocumentation.org/packages/missForest/versions/1.4/topics/missForest for details.
