# Supplementary material for: Exploring Drugs and Vaccines Associated with Altered Risks and Severity of COVID-19: A UK Biobank Cohort Study of All ATC Level-4 Drug Categories Reveals Repositioning Opportunities
Source: Pharmaceutics. 2021 Sep 18;13(9):1514. doi: 10.3390/pharmaceutics13091514 (PMC8471264; doi:10.3390/pharmaceutics13091514)
Supplement: Supplementary file 1 [file pharmaceutics-13-01514-s001.zip › Table S3 All protective associations (p less than 0.05) updated11Jan.xlsx]

## Sheet: a) all protective 
Window	Model	drug	Full name	case_notx	case_tx	ctrl_notx	ctrl_tx	estimate	std.error	statistic	OR	conf.low	conf.high	p	sig	p.adj
6m	A	C08CA	Dihydropyridine derivatives [DG:DG01928]	1103	215	2217	323	-0.235303	0.116931	-2.01232	0.790331	0.628413	0.993969	0.0443	1	0.169
6m	A	C09AA	ACE inhibitors, plain [DG:DG01501]	1132	186	2223	317	-0.384683	0.125037	-3.07656	0.680666	0.532683	0.86976	0.00211	1	0.0143
6m	A	C10AA	HMG CoA reductase inhibitors [DG:DG01660]	895	423	1856	684	-0.565976	0.095497	-5.92664	0.567806	0.470854	0.684719	3.37e-09	1	8.37e-08
6m	A	R03BA	Glucocorticoids	1287	31	2458	82	-0.612637	0.254633	-2.40596	0.54192	0.328944	0.892787	0.0162	1	0.0753
6m	A	S01EE	Prostaglandin analogues	1298	20	2505	35	-0.689225	0.350195	-1.96812	0.501965	0.252634	0.997365	0.0491	1	0.174
6m	C	C09AA	ACE inhibitors, plain [DG:DG01501]	1132	186	347068	46074	-0.291268	0.0986432	-2.95274	0.747316	0.61594	0.906712	0.00315	1	0.00648
6m	C	C10AA	HMG CoA reductase inhibitors [DG:DG01660]	895	423	291331	101811	-0.239738	0.0740346	-3.23819	0.786834	0.680557	0.909707	0.0012	1	0.00263
6m	F	A02BA	H2-receptor antagonists [DG:DG01481]	3807	51	26386	591	-0.398764	0.168602	-2.36512	0.671149	0.48228	0.933983	0.018	1	0.117
6m	F	A02BC	Proton pump inhibitors [DG:DG01646]	2870	988	17691	9286	-0.321774	0.0432595	-7.43822	0.724862	0.665935	0.789005	1.05e-13	1	2.18e-11
6m	F	A03AA	Synthetic anticholinergics, esters with tertiary amino group	3828	30	26650	327	-0.411985	0.209621	-1.96538	0.662334	0.439178	0.998881	0.0494	1	0.257
6m	F	A10AE	Insulins and analogues for injection, long-acting	3827	31	26650	327	-0.647335	0.266548	-2.42859	0.523439	0.310435	0.882593	0.0152	1	0.109
6m	F	A12AX	Calcium, combinations with vitamin D and/or other drugs	3565	293	24103	2874	-0.22265	0.074327	-2.99555	0.800395	0.691886	0.925921	0.00274	1	0.0349
6m	F	B03AA	Iron bivalent, oral preparations	3747	111	26001	976	-0.272938	0.130117	-2.09763	0.76114	0.589799	0.982257	0.036	1	0.204
6m	F	C05AX	Other agents for treatment of hemorrhoids and anal fissures for topical use	3829	29	26678	299	-0.53553	0.217879	-2.45792	0.585359	0.381906	0.897198	0.014	1	0.104
6m	F	C07AB	Beta blocking agents, selective	3460	398	22972	4005	-0.24745	0.0692913	-3.57116	0.780789	0.681633	0.89437	0.000356	1	0.0074
6m	F	C08DB	Benzothiazepine derivatives	3833	25	26600	377	-0.62314	0.259006	-2.40589	0.536258	0.322774	0.89094	0.0161	1	0.11
6m	F	C09AA	ACE inhibitors, plain [DG:DG01501]	3355	503	22656	4321	-0.157171	0.0590729	-2.66062	0.854558	0.761126	0.959459	0.0078	1	0.0659
6m	F	C09CA	Angiotensin II receptor blockers, plain [DG:DG01495]	3571	287	24281	2696	-0.175277	0.0749865	-2.33745	0.839225	0.724514	0.972096	0.0194	1	0.122
6m	F	G03CA	Natural and semisynthetic estrogens, plain	3747	111	25869	1108	-0.461743	0.0988763	-4.6699	0.630184	0.519159	0.764953	3.03e-06	1	0.000158
6m	F	G04CB	Testosterone-5-alpha reductase inhibitors	3793	65	26132	845	-0.46862	0.158012	-2.96572	0.625865	0.459172	0.853074	0.00302	1	0.0349
6m	F	H03AA	Thyroid hormones	3607	251	24575	2402	-0.222705	0.0728647	-3.05642	0.800351	0.693834	0.92322	0.00224	1	0.0311
6m	F	J01DB	First-generation cephalosporins [DG:DG01774]	3836	22	26702	275	-0.54327	0.275051	-1.97516	0.580846	0.338788	0.99585	0.0483	1	0.257
6m	F	J01MA	Fluoroquinolones [DG:DG01549]	3837	21	26716	261	-0.707932	0.268517	-2.63645	0.492662	0.291057	0.833912	0.00838	1	0.0671
6m	F	L02AE	Gonadotropin releasing hormone analogues	3845	13	26718	259	-1.24323	0.377281	-3.29523	0.288452	0.137695	0.604266	0.000984	1	0.0186
6m	F	L02BA	Anti-estrogens	3852	6	26880	97	-0.990395	0.397087	-2.49415	0.37143	0.170554	0.808893	0.0126	1	0.0973
6m	F	M01AE	Propionic acid derivatives	3731	127	25776	1201	-0.387976	0.0952035	-4.07523	0.678429	0.562942	0.817607	4.61e-05	1	0.00137
6m	F	N02AX	Other opioids	3788	70	26227	750	-0.579729	0.155182	-3.73581	0.56005	0.413172	0.759142	0.000188	1	0.00433
6m	F	N03AX	Other antiepileptics	3643	215	25019	1958	-0.379523	0.0882784	-4.29916	0.684188	0.575479	0.813432	1.72e-05	1	0.000596
6m	F	N06AA	Non-selective monoamine reuptake inhibitors [DG:DG01730]	3673	185	25253	1724	-0.255442	0.0887314	-2.87882	0.774574	0.650926	0.92171	0.00399	1	0.0415
6m	F	R01AD	Corticosteroids	3696	162	25456	1521	-0.215542	0.0898382	-2.39922	0.806104	0.675955	0.961313	0.0164	1	0.11
6m	F	R03DC	Leukotriene receptor antagonists	3827	31	26655	322	-0.490933	0.221469	-2.21671	0.612055	0.396523	0.94474	0.0267	1	0.158
6m	F	R05DA	Opium alkaloids and derivatives	3756	102	25940	1037	-0.370875	0.11652	-3.18294	0.69013	0.549219	0.867195	0.00146	1	0.0233
6m	F	S01EC	Carbonic anhydrase inhibitors	3838	20	26665	312	-0.532702	0.259417	-2.05346	0.587017	0.353041	0.976057	0.04	1	0.219
6m	F	S01ED	Beta blocking agents	3830	28	26576	401	-0.583419	0.219706	-2.65546	0.557987	0.362746	0.858313	0.00792	1	0.0659
6m	F	S01XA	Other ophthalmologicals	3712	146	25340	1637	-0.262676	0.0979896	-2.68065	0.768991	0.634613	0.931823	0.00735	1	0.0659
6m	G	A02BC	Proton pump inhibitors [DG:DG01646]	925	393	17691	9286	-0.353462	0.0724149	-4.88106	0.702253	0.609328	0.809349	1.06e-06	1	2.08e-05
6m	G	B01AC	Platelet aggregation inhibitors excl. heparin	1112	206	23000	3977	-0.232442	0.106266	-2.18737	0.792596	0.643568	0.976133	0.0287	1	0.145
6m	G	C07AB	Beta blocking agents, selective	1132	186	22972	4005	-0.271937	0.107139	-2.53816	0.761903	0.617587	0.939941	0.0112	1	0.0789
6m	G	C08CA	Dihydropyridine derivatives [DG:DG01928]	1103	215	22493	4484	-0.229813	0.0929402	-2.4727	0.794682	0.662337	0.953471	0.0134	1	0.0848
6m	G	C09AA	ACE inhibitors, plain [DG:DG01501]	1132	186	22656	4321	-0.386733	0.100173	-3.86063	0.679273	0.558178	0.826638	0.000113	1	0.00154
6m	G	C09CA	Angiotensin II receptor blockers, plain [DG:DG01495]	1208	110	24281	2696	-0.330825	0.122655	-2.69719	0.718331	0.564828	0.913553	0.007	1	0.0516
6m	G	C10AA	HMG CoA reductase inhibitors [DG:DG01660]	895	423	17425	9552	-0.422274	0.0757922	-5.57147	0.655554	0.565056	0.760547	2.55e-08	1	9.03e-07
6m	G	G04CB	Testosterone-5-alpha reductase inhibitors	1286	32	26132	845	-0.520371	0.235326	-2.21128	0.5943	0.374703	0.942592	0.027	1	0.141
6m	G	H03AA	Thyroid hormones	1237	81	24575	2402	-0.40879	0.13289	-3.07615	0.664454	0.512087	0.862156	0.0021	1	0.0196
6m	G	S01ED	Beta blocking agents	1309	9	26576	401	-0.94924	0.406913	-2.33278	0.387035	0.174329	0.859271	0.0197	1	0.112
6m	G	S01EE	Prostaglandin analogues	1298	20	26322	655	-0.72335	0.291172	-2.48427	0.485124	0.274155	0.85844	0.013	1	0.0848
1yrs	A	A02BC	Proton pump inhibitors [DG:DG01646]	862	456	1748	792	-0.257357	0.0846289	-3.04101	0.773092	0.654896	0.912621	0.00237	1	0.0178
1yrs	A	A10BA	Biguanides [DG:DG01684]	1178	140	2367	173	-0.444842	0.184637	-2.40928	0.640925	0.446266	0.920493	0.016	1	0.0874
1yrs	A	C08CA	Dihydropyridine derivatives [DG:DG01928]	1066	252	2159	381	-0.259785	0.110699	-2.34677	0.771218	0.620755	0.95815	0.019	1	0.095
1yrs	A	C09AA	ACE inhibitors, plain [DG:DG01501]	1098	220	2172	368	-0.385028	0.118341	-3.25355	0.680432	0.539537	0.85812	0.00115	1	0.0103
1yrs	A	C09CA	Angiotensin II receptor blockers, plain [DG:DG01495]	1195	123	2338	202	-0.348106	0.14914	-2.3341	0.706024	0.527026	0.945818	0.0196	1	0.0955
1yrs	A	C10AA	HMG CoA reductase inhibitors [DG:DG01660]	854	464	1746	794	-0.69099	0.0943172	-7.32623	0.50108	0.416484	0.602858	2.87e-13	1	5.17e-11
1yrs	A	H03AA	Thyroid hormones	1234	84	2353	187	-0.369555	0.157201	-2.35084	0.691042	0.507752	0.940495	0.0188	1	0.095
1yrs	A	R03BA	Glucocorticoids	1278	40	2418	122	-0.74423	0.220465	-3.37573	0.4751	0.308365	0.731988	0.000744	1	0.00744
1yrs	A	S01ED	Beta blocking agents	1308	10	2516	24	-0.941519	0.467088	-2.01572	0.390035	0.156096	0.974575	0.0439	1	0.165
1yrs	A	S01EE	Prostaglandin analogues	1295	23	2494	46	-0.809775	0.319461	-2.53482	0.444958	0.237852	0.832398	0.0113	1	0.0676
1yrs	B	J07BB	Influenza vaccines	162	8	3392	296	-0.968242	0.425793	-2.27397	0.37975	0.164797	0.87508	0.023	1	0.101
1yrs	C	A10BA	Biguanides [DG:DG01684]	1178	140	369828	23314	-0.400572	0.139206	-2.87755	0.669937	0.509966	0.880089	0.00401	1	0.0111
1yrs	C	A10BJ	Glucagon-like peptide-1 receptor (GLP-1) analogues	1309	9	391309	1833	-1.07885	0.518366	-2.08126	0.339985	0.12309	0.939063	0.0374	1	0.0788
1yrs	C	C08CA	Dihydropyridine derivatives [DG:DG01928]	1066	252	327494	65648	-0.278899	0.086789	-3.21353	0.756616	0.638264	0.896914	0.00131	1	0.00423
1yrs	C	C09AA	ACE inhibitors, plain [DG:DG01501]	1098	220	331703	61439	-0.488408	0.0931624	-5.24255	0.613602	0.511195	0.736525	1.59e-07	1	1.25e-06
1yrs	C	C09CA	Angiotensin II receptor blockers, plain [DG:DG01495]	1195	123	358901	34241	-0.391624	0.11629	-3.36764	0.675958	0.538186	0.848998	0.000758	1	0.00261
1yrs	C	C10AA	HMG CoA reductase inhibitors [DG:DG01660]	854	464	255620	137522	-0.716256	0.0756799	-9.46428	0.488578	0.421226	0.5667	2.97e-21	1	7.42e-20
1yrs	C	H03AA	Thyroid hormones	1234	84	359009	34133	-0.482573	0.128709	-3.74934	0.617193	0.479583	0.794289	0.000177	1	0.000657
1yrs	C	J07BB	Influenza vaccines	1189	129	346811	46331	-0.301061	0.104017	-2.89434	0.740033	0.603547	0.907383	0.0038	1	0.0108
1yrs	C	R03BA	Glucocorticoids	1278	40	378273	14869	-0.389094	0.185742	-2.09481	0.67767	0.470884	0.975265	0.0362	1	0.077
1yrs	C	S01ED	Beta blocking agents	1308	10	388022	5120	-0.853004	0.390861	-2.18237	0.426133	0.198081	0.916743	0.0291	1	0.0632
1yrs	C	S01EE	Prostaglandin analogues	1295	23	384759	8383	-0.600112	0.265697	-2.25864	0.54875	0.325996	0.923713	0.0239	1	0.0543
1yrs	D	C08CA	Dihydropyridine derivatives [DG:DG01928]	133	37	327494	65648	-0.462721	0.232403	-1.99103	0.629568	0.399227	0.992808	0.0465	1	0.0851
1yrs	D	C09AA	ACE inhibitors, plain [DG:DG01501]	135	35	331703	61439	-0.55436	0.242455	-2.28645	0.57444	0.357163	0.923895	0.0222	1	0.0431
1yrs	D	C10AA	HMG CoA reductase inhibitors [DG:DG01660]	91	79	255620	137522	-0.683237	0.197109	-3.46629	0.50498	0.343158	0.743111	0.000528	1	0.00157
1yrs	D	J07BB	Influenza vaccines	162	8	346811	46331	-1.26358	0.407339	-3.10204	0.28264	0.127205	0.628003	0.00192	1	0.00468
1yrs	E	A10AE	Insulins and analogues for injection, long-acting	3821	37	390087	3055	-0.528652	0.230525	-2.29325	0.589399	0.375133	0.926047	0.0218	1	0.0647
1yrs	E	C09AA	ACE inhibitors, plain [DG:DG01501]	3270	588	331703	61439	-0.230727	0.0531087	-4.34444	0.793956	0.715468	0.881054	1.4e-05	1	8.63e-05
1yrs	E	C09CA	Angiotensin II receptor blockers, plain [DG:DG01495]	3533	325	358901	34241	-0.142405	0.0671113	-2.12192	0.86727	0.760377	0.98919	0.0338	1	0.0944
1yrs	E	C10AA	HMG CoA reductase inhibitors [DG:DG01660]	2600	1258	255620	137522	-0.180994	0.0420699	-4.30223	0.83444	0.768396	0.906161	1.69e-05	1	0.0001
1yrs	E	H03AA	Thyroid hormones	3587	271	359009	34133	-0.217739	0.0658626	-3.30596	0.804335	0.706927	0.915166	0.000947	1	0.00423
1yrs	E	J07BB	Influenza vaccines	3554	304	346811	46331	-0.312048	0.0624907	-4.99352	0.731946	0.64757	0.827316	5.93e-07	1	4.5e-06
1yrs	F	A02BA	H2-receptor antagonists [DG:DG01481]	3761	97	25933	1044	-0.303443	0.120946	-2.50892	0.738272	0.582456	0.935771	0.0121	1	0.0821
1yrs	F	A02BC	Proton pump inhibitors [DG:DG01646]	2610	1248	15851	11126	-0.26503	0.0395101	-6.70791	0.767183	0.710013	0.828955	2.01e-11	1	2.38e-09
1yrs	F	A03FA	Propulsives [DG:DG01763]	3821	37	26543	434	-0.490001	0.190487	-2.57236	0.612626	0.421741	0.889906	0.0101	1	0.0783
1yrs	F	A06AC	Bulk-forming laxatives	3839	19	26702	275	-0.557851	0.25976	-2.14756	0.572438	0.344042	0.952457	0.0318	1	0.16
1yrs	F	A09AA	Enzyme preparations	3853	5	26808	169	-1.40972	0.492226	-2.86397	0.244212	0.0930608	0.640865	0.00419	1	0.0397
1yrs	F	A10AE	Insulins and analogues for injection, long-acting	3821	37	26578	399	-0.65571	0.242619	-2.70263	0.519073	0.322629	0.835131	0.00688	1	0.0563
1yrs	F	A11EX	Vitamin B-complex, other combinations	3846	12	26798	179	-0.762488	0.356614	-2.13813	0.466504	0.231896	0.938464	0.0325	1	0.161
1yrs	F	A12AX	Calcium, combinations with vitamin D and/or other drugs	3498	360	23570	3407	-0.192145	0.067389	-2.85128	0.825187	0.723084	0.941708	0.00436	1	0.0397
1yrs	F	B01AB	Heparin group	3843	15	26777	200	-0.700031	0.29722	-2.35527	0.49657	0.277317	0.889168	0.0185	1	0.107
1yrs	F	B01AC	Platelet aggregation inhibitors excl. heparin	3362	496	22455	4522	-0.153966	0.0654507	-2.35239	0.857302	0.754084	0.974648	0.0187	1	0.107
1yrs	F	B01AF	Direct factor Xa inhibitors	3632	226	24705	2272	-0.174785	0.0856339	-2.04108	0.839637	0.7099	0.993085	0.0413	1	0.188
1yrs	F	B03AA	Iron bivalent, oral preparations	3706	152	25530	1447	-0.306574	0.106501	-2.8786	0.735964	0.597309	0.906805	0.004	1	0.0397
1yrs	F	C03DA	Aldosterone antagonists	3804	54	26367	610	-0.346989	0.175809	-1.97367	0.706813	0.500783	0.997607	0.0484	1	0.209
1yrs	F	C05AX	Other agents for treatment of hemorrhoids and anal fissures for topical use	3805	53	26390	587	-0.582456	0.159032	-3.6625	0.558525	0.408949	0.76281	0.00025	1	0.00593
1yrs	F	C07AB	Beta blocking agents, selective	3406	452	22562	4415	-0.222498	0.0660707	-3.36758	0.800516	0.70328	0.911196	0.000759	1	0.0129
1yrs	F	C08DB	Benzothiazepine derivatives	3827	31	26546	431	-0.484388	0.228486	-2.11999	0.616074	0.393675	0.964114	0.034	1	0.161
1yrs	F	C09AA	ACE inhibitors, plain [DG:DG01501]	3270	588	22100	4877	-0.131864	0.0559725	-2.35588	0.87646	0.785392	0.978088	0.0185	1	0.107
1yrs	F	C09CA	Angiotensin II receptor blockers, plain [DG:DG01495]	3533	325	23977	3000	-0.166214	0.0713223	-2.33046	0.846865	0.73638	0.973927	0.0198	1	0.107
1yrs	F	D02AC	Soft paraffin and fat products	3790	68	26256	721	-0.286651	0.145308	-1.97271	0.750774	0.5647	0.99816	0.0485	1	0.209
1yrs	F	G03CA	Natural and semisynthetic estrogens, plain	3679	179	25257	1720	-0.397705	0.0784991	-5.06637	0.67186	0.576047	0.78361	4.08e-07	1	2.42e-05
1yrs	F	G04CB	Testosterone-5-alpha reductase inhibitors	3778	80	26001	976	-0.357892	0.139982	-2.5567	0.699148	0.531388	0.919871	0.0106	1	0.0783
1yrs	F	H03AA	Thyroid hormones	3587	271	24401	2576	-0.211849	0.0701008	-3.02207	0.809087	0.705217	0.928255	0.00251	1	0.0298
1yrs	F	J01DB	First-generation cephalosporins [DG:DG01774]	3814	44	26516	461	-0.382951	0.193542	-1.97865	0.681846	0.466592	0.996405	0.0479	1	0.209
1yrs	F	J01EA	Trimethoprim and derivatives [DG:DG01581]	3782	76	26112	865	-0.369297	0.134616	-2.74334	0.69122	0.530917	0.899925	0.00609	1	0.0515
1yrs	F	J01MA	Fluoroquinolones [DG:DG01549]	3821	37	26450	527	-0.709829	0.193237	-3.67336	0.491728	0.336694	0.71815	0.00024	1	0.00593
1yrs	F	J01XX	Other antibacterials	3851	7	26830	147	-1.33864	0.523567	-2.55676	0.262203	0.0939636	0.731673	0.0106	1	0.0783
1yrs	F	J07AL	Pneumococcal vaccines	3840	18	26744	233	-0.687357	0.246475	-2.78876	0.502903	0.310225	0.815253	0.00529	1	0.0465
1yrs	F	J07BB	Influenza vaccines	3554	304	22905	4072	-0.51536	0.0652543	-7.89772	0.597285	0.525575	0.678779	2.94e-15	1	6.97e-13
1yrs	F	J07CA	Bacterial and viral vaccines, combined	3831	27	26709	268	-0.574266	0.201116	-2.8554	0.563118	0.379667	0.835211	0.0043	1	0.0397
1yrs	F	L01BC	Pyrimidine analogues	3845	13	26718	259	-0.658799	0.275264	-2.39334	0.517473	0.301699	0.887567	0.0167	1	0.104
1yrs	F	L02AE	Gonadotropin releasing hormone analogues	3838	20	26647	330	-0.888432	0.287763	-3.08737	0.4113	0.233994	0.722958	0.00202	1	0.0262
1yrs	F	L02BA	Anti-estrogens	3849	9	26853	124	-0.811831	0.333057	-2.43751	0.444044	0.231162	0.852975	0.0148	1	0.0974
1yrs	F	M01AE	Propionic acid derivatives	3600	258	24862	2115	-0.230299	0.0676519	-3.40418	0.794296	0.695656	0.906922	0.000665	1	0.0129
1yrs	F	N02AX	Other opioids	3753	105	25926	1051	-0.465822	0.123557	-3.7701	0.627619	0.492629	0.799599	0.000163	1	0.00484
1yrs	F	N02CX	Other antimigraine preparations	3850	8	26883	94	-0.885815	0.419583	-2.11118	0.412378	0.181189	0.938554	0.0348	1	0.162
1yrs	F	N03AX	Other antiepileptics	3593	265	24621	2356	-0.3512	0.0794964	-4.41781	0.703843	0.60229	0.822519	1e-05	1	0.000395
1yrs	F	N06AA	Non-selective monoamine reuptake inhibitors [DG:DG01730]	3602	256	24659	2318	-0.23194	0.0749852	-3.09315	0.792994	0.684604	0.918543	0.00198	1	0.0262
1yrs	F	R03DC	Leukotriene receptor antagonists	3821	37	26591	386	-0.468675	0.200886	-2.33304	0.625831	0.422139	0.927809	0.0197	1	0.107
1yrs	F	R05DA	Opium alkaloids and derivatives	3668	190	25218	1759	-0.30051	0.086928	-3.457	0.740441	0.624445	0.877983	0.000547	1	0.0118
1yrs	F	S01BA	Corticosteroids, plain	3842	16	26706	271	-0.632446	0.270046	-2.34199	0.531291	0.312939	0.901998	0.0192	1	0.107
1yrs	F	S01EC	Carbonic anhydrase inhibitors	3835	23	26619	358	-0.521655	0.239042	-2.18228	0.593537	0.371507	0.948263	0.0291	1	0.153
1yrs	F	S01ED	Beta blocking agents	3824	34	26522	455	-0.499068	0.19853	-2.51382	0.607096	0.411398	0.895886	0.012	1	0.0821
1yrs	F	S01XA	Other ophthalmologicals	3669	189	24852	2125	-0.267089	0.0860213	-3.10492	0.765605	0.646815	0.90621	0.00191	1	0.0262
1yrs	F	S03BA	Corticosteroids	3850	8	26846	131	-0.809437	0.374422	-2.16183	0.445109	0.213671	0.92723	0.0306	1	0.158
1yrs	G	A02BC	Proton pump inhibitors [DG:DG01646]	862	456	15851	11126	-0.412951	0.0683675	-6.04017	0.661695	0.57871	0.75658	1.56e-09	1	7.8e-08
1yrs	G	B01AC	Platelet aggregation inhibitors excl. heparin	1087	231	22455	4522	-0.259358	0.102194	-2.53791	0.771546	0.631497	0.942656	0.0112	1	0.077
1yrs	G	C07AB	Beta blocking agents, selective	1104	214	22562	4415	-0.221288	0.101926	-2.17106	0.801486	0.656345	0.978722	0.0299	1	0.162
1yrs	G	C08CA	Dihydropyridine derivatives [DG:DG01928]	1066	252	21802	5175	-0.225025	0.0881175	-2.5537	0.798496	0.671837	0.949034	0.0107	1	0.077
1yrs	G	C08DB	Benzothiazepine derivatives	1307	11	26546	431	-0.785838	0.385996	-2.03587	0.455738	0.213865	0.971157	0.0418	1	0.204
1yrs	G	C09AA	ACE inhibitors, plain [DG:DG01501]	1098	220	22100	4877	-0.342168	0.0941613	-3.63385	0.710229	0.590534	0.854185	0.00028	1	0.004
1yrs	G	C09CA	Angiotensin II receptor blockers, plain [DG:DG01495]	1195	123	23977	3000	-0.367293	0.118531	-3.0987	0.692607	0.54902	0.873746	0.00195	1	0.0185
1yrs	G	C10AA	HMG CoA reductase inhibitors [DG:DG01660]	854	464	16421	10556	-0.465819	0.0745245	-6.25054	0.627621	0.542325	0.726333	4.15e-10	1	2.77e-08
1yrs	G	G03CA	Natural and semisynthetic estrogens, plain	1269	49	25257	1720	-0.372823	0.151742	-2.45696	0.688787	0.511584	0.927371	0.014	1	0.0876
1yrs	G	G04CB	Testosterone-5-alpha reductase inhibitors	1280	38	26001	976	-0.436598	0.21152	-2.0641	0.646231	0.426908	0.978232	0.039	1	0.195
1yrs	G	H03AA	Thyroid hormones	1234	84	24401	2576	-0.451533	0.130723	-3.45413	0.636651	0.492749	0.822579	0.000553	1	0.0065
1yrs	G	J07BB	Influenza vaccines	1189	129	22905	4072	-0.48616	0.105806	-4.59484	0.614983	0.499802	0.75671	4.35e-06	1	0.000109
1yrs	G	M01AE	Propionic acid derivatives	1232	86	24862	2115	-0.239425	0.119363	-2.00585	0.78708	0.622891	0.994547	0.0449	1	0.214
1yrs	G	R03BA	Glucocorticoids	1278	40	25749	1228	-0.487698	0.187835	-2.59641	0.614038	0.424916	0.887336	0.00942	1	0.0754
1yrs	G	R03DC	Leukotriene receptor antagonists	1307	11	26591	386	-0.796216	0.379269	-2.09934	0.451033	0.214466	0.948542	0.0358	1	0.188
1yrs	G	S01ED	Beta blocking agents	1308	10	26522	455	-1.01931	0.394876	-2.58135	0.360843	0.166412	0.782441	0.00985	1	0.0757
1yrs	G	S01EE	Prostaglandin analogues	1295	23	26236	741	-0.685195	0.269925	-2.53846	0.503992	0.296929	0.855449	0.0111	1	0.077
1yrs	G	S01XA	Other ophthalmologicals	1236	82	24852	2125	-0.339176	0.137413	-2.4683	0.712357	0.54416	0.932543	0.0136	1	0.0876
1yrs	H	J07BB	Influenza vaccines	162	8	22905	4072	-1.4502	0.409877	-3.53813	0.234524	0.105023	0.52371	0.000404	1	0.00332
2yrs	A	A02BC	Proton pump inhibitors [DG:DG01646]	789	529	1583	957	-0.261787	0.0798213	-3.27967	0.769675	0.658176	0.900063	0.00105	1	0.018
2yrs	A	A10BA	Biguanides [DG:DG01684]	1165	153	2348	192	-0.510116	0.181613	-2.8088	0.600426	0.420554	0.857231	0.005	1	0.0515
2yrs	A	C08CA	Dihydropyridine derivatives [DG:DG01928]	1034	284	2120	420	-0.253879	0.107009	-2.37251	0.775785	0.628965	0.956878	0.0177	1	0.122
2yrs	A	C09AA	ACE inhibitors, plain [DG:DG01501]	1074	244	2135	405	-0.39423	0.114589	-3.4404	0.674199	0.538541	0.844028	0.000587	1	0.011
2yrs	A	C09CA	Angiotensin II receptor blockers, plain [DG:DG01495]	1177	141	2326	214	-0.323074	0.144582	-2.23453	0.72392	0.545234	0.961166	0.0255	1	0.15
2yrs	A	C10AA	HMG CoA reductase inhibitors [DG:DG01660]	821	497	1693	847	-0.72123	0.0935003	-7.71367	0.486154	0.404726	0.583965	1.55e-14	1	3.19e-12
2yrs	A	H03AA	Thyroid hormones	1233	85	2352	188	-0.362387	0.156603	-2.31405	0.696013	0.512006	0.94615	0.0207	1	0.138
2yrs	A	N07CA	Antivertigo preparations	1288	30	2482	58	-0.688281	0.289741	-2.3755	0.502439	0.284694	0.886726	0.0176	1	0.122
2yrs	A	R03BA	Glucocorticoids	1264	54	2394	146	-0.59194	0.195209	-3.03234	0.553253	0.377319	0.81122	0.00244	1	0.0336
2yrs	A	S01EE	Prostaglandin analogues	1294	24	2491	49	-0.777727	0.309639	-2.51172	0.459449	0.250374	0.843113	0.0121	1	0.104
2yrs	B	J07BB	Influenza vaccines	160	10	3324	364	-1.0025	0.376314	-2.66399	0.366962	0.175469	0.767434	0.00775	1	0.0529
2yrs	B	R01AD	Corticosteroids	160	10	3282	406	-0.95479	0.422822	-2.25813	0.384893	0.168004	0.881781	0.024	1	0.113
2yrs	C	A10BA	Biguanides [DG:DG01684]	1165	153	368443	24699	-0.37883	0.137289	-2.75936	0.684662	0.523137	0.896061	0.00579	1	0.0168
2yrs	C	C08CA	Dihydropyridine derivatives [DG:DG01928]	1034	284	321678	71464	-0.246055	0.0836509	-2.94145	0.781879	0.663645	0.921178	0.00327	1	0.0111
2yrs	C	C09AA	ACE inhibitors, plain [DG:DG01501]	1074	244	327125	66017	-0.461719	0.0899305	-5.13417	0.630199	0.528359	0.75167	2.84e-07	1	2.6e-06
2yrs	C	C09CA	Angiotensin II receptor blockers, plain [DG:DG01495]	1177	141	357251	35891	-0.319795	0.111023	-2.88044	0.726298	0.584267	0.902855	0.00397	1	0.0125
2yrs	C	C10AA	HMG CoA reductase inhibitors [DG:DG01660]	821	497	249370	143772	-0.70364	0.0750709	-9.373	0.494781	0.427083	0.57321	7.09e-21	1	2.6e-19
2yrs	C	H03AA	Thyroid hormones	1233	85	358601	34541	-0.485569	0.128112	-3.7902	0.615347	0.478708	0.790987	0.00015	1	0.000736
2yrs	C	J07BB	Influenza vaccines	1161	157	342364	50778	-0.291022	0.0942398	-3.0881	0.747499	0.621432	0.899142	0.00201	1	0.00727
2yrs	C	R03BA	Glucocorticoids	1264	54	374491	18651	-0.330699	0.162808	-2.03122	0.718421	0.522151	0.988467	0.0422	1	0.0988
2yrs	C	S01EE	Prostaglandin analogues	1294	24	383778	9364	-0.641363	0.256602	-2.49945	0.526574	0.318448	0.870723	0.0124	1	0.033
2yrs	D	A10BA	Biguanides [DG:DG01684]	152	18	368443	24699	-0.786474	0.391425	-2.00926	0.455448	0.211474	0.980892	0.0445	1	0.0873
2yrs	D	C09AA	ACE inhibitors, plain [DG:DG01501]	131	39	327125	66017	-0.528387	0.233934	-2.2587	0.589555	0.372734	0.932502	0.0239	1	0.0529
2yrs	D	C10AA	HMG CoA reductase inhibitors [DG:DG01660]	86	84	249370	143772	-0.694608	0.197566	-3.51583	0.49927	0.338974	0.735368	0.000438	1	0.00163
2yrs	D	J07BB	Influenza vaccines	160	10	342364	50778	-1.20902	0.357566	-3.38124	0.298491	0.148105	0.601579	0.000722	1	0.0023
2yrs	D	R01AD	Corticosteroids	160	10	354259	38883	-0.819468	0.400261	-2.04733	0.440666	0.201097	0.965636	0.0406	1	0.0829
2yrs	E	A10AE	Insulins and analogues for injection, long-acting	3816	42	389850	3292	-0.443401	0.214439	-2.06772	0.64185	0.421601	0.977159	0.0387	1	0.114
2yrs	E	C09AA	ACE inhibitors, plain [DG:DG01501]	3209	649	327125	66017	-0.207374	0.0513484	-4.03857	0.812715	0.734904	0.898766	5.38e-05	1	0.000341
2yrs	E	C10AA	HMG CoA reductase inhibitors [DG:DG01660]	2514	1344	249370	143772	-0.14982	0.0415283	-3.60766	0.860863	0.79357	0.933863	0.000309	1	0.00152
2yrs	E	H03AA	Thyroid hormones	3585	273	358601	34541	-0.225512	0.0656614	-3.43447	0.798107	0.70173	0.907722	0.000594	1	0.00281
2yrs	E	J07BB	Influenza vaccines	3484	374	342364	50778	-0.282029	0.0560364	-5.03296	0.754252	0.6758	0.841811	4.83e-07	1	4.83e-06
2yrs	E	J07CA	Bacterial and viral vaccines, combined	3777	81	382676	10466	-0.21593	0.107107	-2.01602	0.805792	0.65321	0.994015	0.0438	1	0.127
2yrs	F	A02BC	Proton pump inhibitors [DG:DG01646]	2372	1486	14288	12689	-0.221975	0.0373918	-5.93648	0.800935	0.744335	0.86184	2.94e-09	1	2.55e-07
2yrs	F	A03AA	Synthetic anticholinergics, esters with tertiary amino group	3795	63	26290	687	-0.372282	0.138264	-2.69254	0.68916	0.525563	0.903681	0.00709	1	0.0683
2yrs	F	A03AX	Other drugs for functional gastrointestinal disorders	3830	28	26633	344	-0.496015	0.214626	-2.31106	0.608953	0.39984	0.92743	0.0208	1	0.128
2yrs	F	A03FA	Propulsives [DG:DG01763]	3806	52	26276	701	-0.665652	0.161244	-4.12823	0.513938	0.374675	0.704965	3.67e-05	1	0.00119
2yrs	F	A04AA	Serotonin (5HT3) antagonists	3847	11	26788	189	-0.746772	0.328702	-2.27188	0.473894	0.248816	0.902577	0.0231	1	0.128
2yrs	F	A06AC	Bulk-forming laxatives	3829	29	26594	383	-0.572503	0.22342	-2.56245	0.564112	0.364068	0.874074	0.0104	1	0.0901
2yrs	F	A06AD	Osmotically acting laxatives	3387	471	22899	4078	-0.131861	0.0605898	-2.1763	0.876463	0.778318	0.986983	0.0295	1	0.145
2yrs	F	A06AX	Other drugs for constipation	3839	19	26669	308	-0.679485	0.259874	-2.61467	0.506878	0.304571	0.843563	0.00894	1	0.0801
2yrs	F	A07EC	Aminosalicylic acid and similar agents	3820	38	26567	410	-0.388917	0.183458	-2.11993	0.677791	0.473075	0.971094	0.034	1	0.155
2yrs	F	A09AA	Enzyme preparations	3853	5	26801	176	-1.46913	0.491689	-2.98794	0.230125	0.0877851	0.603261	0.00281	1	0.0348
2yrs	F	A10AE	Insulins and analogues for injection, long-acting	3816	42	26549	428	-0.562531	0.226553	-2.483	0.569765	0.365465	0.888272	0.013	1	0.101
2yrs	F	A12AX	Calcium, combinations with vitamin D and/or other drugs	3427	431	23057	3920	-0.133789	0.0619397	-2.15999	0.874774	0.774766	0.987691	0.0308	1	0.148
2yrs	F	B01AC	Platelet aggregation inhibitors excl. heparin	3304	554	21956	5021	-0.144063	0.0626062	-2.30109	0.865834	0.765847	0.978874	0.0214	1	0.128
2yrs	F	B01AF	Direct factor Xa inhibitors	3618	240	24557	2420	-0.189355	0.0830265	-2.28065	0.827493	0.703217	0.973732	0.0226	1	0.128
2yrs	F	C01BC	Antiarrhythmics, class Ic [DG:DG01650]	3850	8	26812	165	-0.901711	0.387685	-2.32588	0.405875	0.189837	0.867767	0.02	1	0.127
2yrs	F	C05AE	Muscle relaxants	3849	9	26820	157	-1.10207	0.373554	-2.95023	0.332183	0.159733	0.690811	0.00318	1	0.0359
2yrs	F	C05AX	Other agents for treatment of hemorrhoids and anal fissures for topical use	3753	105	25921	1056	-0.447728	0.111663	-4.00963	0.639078	0.513455	0.795437	6.1e-05	1	0.00159
2yrs	F	C07AB	Beta blocking agents, selective	3375	483	22219	4758	-0.250781	0.064075	-3.91386	0.778193	0.686348	0.882328	9.1e-05	1	0.00215
2yrs	F	C08DB	Benzothiazepine derivatives	3822	36	26484	493	-0.409238	0.206678	-1.98008	0.664156	0.442934	0.995868	0.0477	1	0.205
2yrs	F	C09AA	ACE inhibitors, plain [DG:DG01501]	3209	649	21582	5395	-0.133528	0.054097	-2.46831	0.875003	0.786974	0.972879	0.0136	1	0.101
2yrs	F	C09CA	Angiotensin II receptor blockers, plain [DG:DG01495]	3503	355	23739	3238	-0.167637	0.0693287	-2.41801	0.84566	0.738212	0.968748	0.0156	1	0.113
2yrs	F	D06AX	Other antibiotics for topical use	3755	103	26050	927	-0.252245	0.11392	-2.21423	0.777054	0.621553	0.971458	0.0268	1	0.142
2yrs	F	G03CA	Natural and semisynthetic estrogens, plain	3615	243	24712	2265	-0.36021	0.0691184	-5.21148	0.69753	0.609154	0.798728	1.89e-07	1	9.83e-06
2yrs	F	G04CB	Testosterone-5-alpha reductase inhibitors	3765	93	25897	1080	-0.32432	0.129876	-2.49716	0.723019	0.560525	0.932619	0.0125	1	0.101
2yrs	F	H02AB	Glucocorticoids	3378	480	22832	4145	-0.141098	0.0592779	-2.38029	0.868404	0.773147	0.975396	0.0173	1	0.122
2yrs	F	H03AA	Thyroid hormones	3585	273	24385	2592	-0.210696	0.0698886	-3.01473	0.810021	0.706325	0.92894	0.00257	1	0.0335
2yrs	F	J01CR	Combinations of penicillins, incl. beta-lactamase inhibitors	3664	194	25284	1693	-0.203589	0.0874563	-2.3279	0.815798	0.687285	0.968341	0.0199	1	0.127
2yrs	F	J01EA	Trimethoprim and derivatives [DG:DG01581]	3705	153	25412	1565	-0.239134	0.0947701	-2.52331	0.787309	0.653843	0.948019	0.0116	1	0.0975
2yrs	F	J01MA	Fluoroquinolones [DG:DG01549]	3775	83	26014	963	-0.527391	0.130588	-4.0386	0.590143	0.456874	0.762286	5.39e-05	1	0.00156
2yrs	F	J07AL	Pneumococcal vaccines	3821	37	26541	436	-0.535441	0.169536	-3.15827	0.585411	0.4199	0.816161	0.00159	1	0.0217
2yrs	F	J07AP	Typhoid vaccines	3820	38	26631	346	-0.364335	0.160444	-2.27079	0.694658	0.507219	0.951364	0.0232	1	0.128
2yrs	F	J07BB	Influenza vaccines	3484	374	22138	4839	-0.477184	0.0586805	-8.13189	0.620529	0.553109	0.696166	4.38e-16	1	1.14e-13
2yrs	F	J07BC	Hepatitis vaccines	3838	20	26766	211	-0.438476	0.211932	-2.06895	0.645019	0.425763	0.977184	0.0386	1	0.173
2yrs	F	J07CA	Bacterial and viral vaccines, combined	3777	81	26262	715	-0.338569	0.114285	-2.9625	0.712789	0.569742	0.891753	0.00305	1	0.0359
2yrs	F	L01BC	Pyrimidine analogues	3819	39	26435	542	-0.363868	0.169041	-2.15255	0.694983	0.498977	0.967983	0.0314	1	0.148
2yrs	F	L02AE	Gonadotropin releasing hormone analogues	3834	24	26592	385	-0.87045	0.263888	-3.29856	0.418763	0.249653	0.702424	0.000973	1	0.0149
2yrs	F	L02BA	Anti-estrogens	3845	13	26815	162	-0.648094	0.274143	-2.36407	0.523042	0.305616	0.895152	0.0181	1	0.124
2yrs	F	M01AB	Acetic acid derivatives and related substances	3825	33	26656	321	-0.519332	0.190083	-2.73213	0.594918	0.409875	0.8635	0.0063	1	0.063
2yrs	F	M01AE	Propionic acid derivatives	3378	480	23469	3508	-0.112951	0.0517255	-2.18366	0.893195	0.807078	0.9885	0.029	1	0.145
2yrs	F	N01BX	Other local anesthetics	3835	23	26658	319	-0.616079	0.249106	-2.47316	0.540058	0.33143	0.880011	0.0134	1	0.101
2yrs	F	N02AX	Other opioids	3699	159	25430	1547	-0.380996	0.0987436	-3.85843	0.683181	0.562965	0.829067	0.000114	1	0.00229
2yrs	F	N03AX	Other antiepileptics	3525	333	24025	2952	-0.315644	0.0702976	-4.49011	0.729319	0.635445	0.837062	7.15e-06	1	0.00031
2yrs	F	N05CF	Benzodiazepine related drugs	3720	138	25770	1207	-0.196137	0.0992317	-1.97655	0.8219	0.676627	0.998363	0.0481	1	0.205
2yrs	F	N06AA	Non-selective monoamine reuptake inhibitors [DG:DG01730]	3498	360	23773	3204	-0.231503	0.0635029	-3.64555	0.793341	0.700493	0.898495	0.000267	1	0.00496
2yrs	F	R03AC	Selective beta-2-adrenoreceptor agonists	3250	608	22189	4788	-0.142487	0.0605276	-2.35409	0.867198	0.770185	0.976431	0.0186	1	0.124
2yrs	F	R05DA	Opium alkaloids and derivatives	3529	329	24113	2864	-0.227422	0.0671042	-3.38909	0.796585	0.69841	0.908559	0.000702	1	0.0122
2yrs	F	S01BC	Antiinflammatory agents, non-steroids	3853	5	26879	98	-1.25034	0.586371	-2.13233	0.286408	0.0907498	0.90391	0.033	1	0.153
2yrs	F	S01EC	Carbonic anhydrase inhibitors	3833	25	26574	403	-0.600993	0.229556	-2.61807	0.548267	0.349612	0.859801	0.00885	1	0.0801
2yrs	F	S01ED	Beta blocking agents	3817	41	26470	507	-0.401292	0.178196	-2.25197	0.669455	0.472101	0.94931	0.0243	1	0.132
2yrs	F	S01XA	Other ophthalmologicals	3601	257	24332	2645	-0.206798	0.075642	-2.7339	0.813184	0.701132	0.943144	0.00626	1	0.063
2yrs	F	V07AY	Other non-therapeutic auxiliary products	3583	275	24783	2194	-0.163076	0.0816164	-1.99808	0.849527	0.72394	0.996901	0.0457	1	0.201
2yrs	G	A02BC	Proton pump inhibitors [DG:DG01646]	789	529	14288	12689	-0.392392	0.0652227	-6.01619	0.675439	0.594383	0.767549	1.81e-09	1	9.96e-08
2yrs	G	A03AA	Synthetic anticholinergics, esters with tertiary amino group	1298	20	26290	687	-0.59961	0.261809	-2.29026	0.549026	0.328648	0.917179	0.022	1	0.142
2yrs	G	B01AC	Platelet aggregation inhibitors excl. heparin	1061	257	21956	5021	-0.254558	0.0983952	-2.5871	0.775259	0.639277	0.940166	0.00968	1	0.0819
2yrs	G	C07AB	Beta blocking agents, selective	1092	226	22219	4758	-0.274006	0.100166	-2.73551	0.760328	0.624792	0.925265	0.00623	1	0.0623
2yrs	G	C08CA	Dihydropyridine derivatives [DG:DG01928]	1034	284	21145	5832	-0.231561	0.0848057	-2.73049	0.793294	0.671807	0.936751	0.00633	1	0.0623
2yrs	G	C08DB	Benzothiazepine derivatives	1306	12	26484	493	-0.752198	0.354085	-2.12434	0.47133	0.235458	0.943486	0.0336	1	0.176
2yrs	G	C09AA	ACE inhibitors, plain [DG:DG01501]	1074	244	21582	5395	-0.345995	0.0908644	-3.80782	0.707516	0.592092	0.845441	0.00014	1	0.00281
2yrs	G	C09CA	Angiotensin II receptor blockers, plain [DG:DG01495]	1177	141	23739	3238	-0.326529	0.113221	-2.88399	0.721424	0.577846	0.900676	0.00393	1	0.048
2yrs	G	C10AA	HMG CoA reductase inhibitors [DG:DG01660]	821	497	15850	11127	-0.467026	0.0738902	-6.32054	0.626864	0.542344	0.724555	2.65e-10	1	2.92e-08
2yrs	G	G03CA	Natural and semisynthetic estrogens, plain	1256	62	24712	2265	-0.411647	0.135777	-3.03178	0.662558	0.507744	0.864575	0.00243	1	0.0335
2yrs	G	G04CB	Testosterone-5-alpha reductase inhibitors	1275	43	25897	1080	-0.422462	0.198871	-2.1243	0.655431	0.443854	0.967863	0.0336	1	0.176
2yrs	G	H03AA	Thyroid hormones	1233	85	24385	2592	-0.446214	0.130116	-3.42936	0.640047	0.495967	0.825983	0.000606	1	0.00952
2yrs	G	J07BB	Influenza vaccines	1161	157	22138	4839	-0.471735	0.0959481	-4.91656	0.623919	0.516956	0.753014	8.86e-07	1	2.78e-05
2yrs	G	J07CA	Bacterial and viral vaccines, combined	1295	23	26262	715	-0.479275	0.223322	-2.14612	0.619232	0.399718	0.959297	0.0319	1	0.176
2yrs	G	N02AX	Other opioids	1252	66	25430	1547	-0.403063	0.159438	-2.52803	0.66827	0.488914	0.913422	0.0115	1	0.0935
2yrs	G	R03BA	Glucocorticoids	1264	54	25467	1510	-0.403857	0.164918	-2.44884	0.667739	0.483307	0.922553	0.0143	1	0.105
2yrs	G	S01ED	Beta blocking agents	1304	14	26470	507	-0.801618	0.336631	-2.38129	0.448603	0.231904	0.867791	0.0173	1	0.122
2yrs	G	S01EE	Prostaglandin analogues	1294	24	26139	838	-0.736073	0.26034	-2.82735	0.478991	0.287552	0.797883	0.0047	1	0.0544
2yrs	G	S01XA	Other ophthalmologicals	1207	111	24332	2645	-0.258788	0.120133	-2.15418	0.771987	0.610025	0.976948	0.0312	1	0.176
2yrs	H	C10AA	HMG CoA reductase inhibitors [DG:DG01660]	86	84	15850	11127	-0.386775	0.194782	-1.98568	0.679244	0.463681	0.99502	0.0471	1	0.133
2yrs	H	G04CB	Testosterone-5-alpha reductase inhibitors	164	6	25897	1080	-1.18309	0.585712	-2.01992	0.306331	0.0971875	0.965545	0.0434	1	0.133
2yrs	H	J07BB	Influenza vaccines	160	10	22138	4839	-1.40449	0.360127	-3.89998	0.245493	0.121195	0.497271	9.64e-05	1	0.000911
2yrs	H	R01AD	Corticosteroids	160	10	23534	3443	-0.942393	0.40261	-2.34071	0.389694	0.177013	0.85791	0.0192	1	0.0741
5yrs	A	A02BC	Proton pump inhibitors [DG:DG01646]	612	706	1267	1273	-0.16672	0.075021	-2.22231	0.846436	0.730661	0.980556	0.0263	1	0.192
5yrs	A	A03AA	Synthetic anticholinergics, esters with tertiary amino group	1278	40	2440	100	-0.50172	0.219954	-2.28103	0.605488	0.393389	0.931944	0.0226	1	0.192
5yrs	A	A10BA	Biguanides [DG:DG01684]	1143	175	2336	204	-0.427385	0.179837	-2.37651	0.652212	0.458419	0.927929	0.0175	1	0.191
5yrs	A	C09AA	ACE inhibitors, plain [DG:DG01501]	1005	313	2051	489	-0.335908	0.106704	-3.14805	0.714689	0.579778	0.880992	0.00166	1	0.0391
5yrs	A	C09CA	Angiotensin II receptor blockers, plain [DG:DG01495]	1153	165	2303	237	-0.279049	0.137816	-2.0248	0.756503	0.577383	0.991189	0.043	1	0.253
5yrs	A	C10AA	HMG CoA reductase inhibitors [DG:DG01660]	744	574	1617	923	-0.610507	0.0912542	-6.69018	0.543075	0.454109	0.649472	2.55e-11	1	6.02e-09
5yrs	A	H03AA	Thyroid hormones	1232	86	2350	190	-0.369785	0.156021	-2.3701	0.690883	0.508812	0.938105	0.0178	1	0.191
5yrs	A	S01EE	Prostaglandin analogues	1287	31	2480	60	-0.628169	0.272663	-2.30383	0.533568	0.312626	0.910656	0.0213	1	0.192
5yrs	B	G04CB	Testosterone-5-alpha reductase inhibitors	163	7	3580	108	-1.23348	0.597259	-2.06523	0.291278	0.090315	0.939411	0.039	1	0.207
5yrs	C	A10BA	Biguanides [DG:DG01684]	1143	175	365792	27350	-0.392638	0.13718	-2.86221	0.675273	0.516073	0.883584	0.00421	1	0.0151
5yrs	C	C08CA	Dihydropyridine derivatives [DG:DG01928]	967	351	310104	83038	-0.175898	0.0790492	-2.22517	0.838704	0.718326	0.979255	0.0261	1	0.067
5yrs	C	C09AA	ACE inhibitors, plain [DG:DG01501]	1005	313	316247	76895	-0.352677	0.0834334	-4.22705	0.702804	0.596782	0.827662	2.37e-05	1	0.000193
5yrs	C	C09CA	Angiotensin II receptor blockers, plain [DG:DG01495]	1153	165	353839	39303	-0.277539	0.105377	-2.63378	0.757646	0.616268	0.931458	0.00844	1	0.0266
5yrs	C	C10AA	HMG CoA reductase inhibitors [DG:DG01660]	744	574	237935	155207	-0.560475	0.0735486	-7.62046	0.570938	0.494293	0.659468	2.53e-14	1	7.97e-13
5yrs	C	H03AA	Thyroid hormones	1232	86	358061	35081	-0.496625	0.127662	-3.89016	0.608581	0.473862	0.781601	0.0001	1	0.000601
5yrs	C	J07BB	Influenza vaccines	1090	228	321673	71469	-0.18668	0.0810577	-2.30305	0.829709	0.70783	0.972574	0.0213	1	0.0577
5yrs	C	S01ED	Beta blocking agents	1303	15	386366	6776	-0.705415	0.315344	-2.23697	0.493904	0.266207	0.916356	0.0253	1	0.0657
5yrs	C	S01EE	Prostaglandin analogues	1287	31	381566	11576	-0.551533	0.22187	-2.48584	0.576066	0.37292	0.889875	0.0129	1	0.0371
5yrs	D	C10AA	HMG CoA reductase inhibitors [DG:DG01660]	69	101	237935	155207	-0.476403	0.201001	-2.37015	0.621013	0.418801	0.92086	0.0178	1	0.0622
5yrs	D	G04CB	Testosterone-5-alpha reductase inhibitors	163	7	381421	11721	-1.11894	0.563047	-1.9873	0.326625	0.108338	0.984729	0.0469	1	0.115
5yrs	D	J07BB	Influenza vaccines	147	23	321673	71469	-0.639822	0.247724	-2.5828	0.527386	0.324538	0.857023	0.0098	1	0.0383
5yrs	E	C09AA	ACE inhibitors, plain [DG:DG01501]	3056	802	316247	76895	-0.135621	0.0481385	-2.81731	0.873173	0.794557	0.959569	0.00484	1	0.02
5yrs	E	C10AA	HMG CoA reductase inhibitors [DG:DG01660]	2361	1497	237935	155207	-0.0852664	0.0408115	-2.08927	0.918268	0.847677	0.994737	0.0367	1	0.104
5yrs	E	C10AB	Fibrates	3837	21	390666	2476	-0.633914	0.287013	-2.20866	0.530511	0.302265	0.93111	0.0272	1	0.081
5yrs	E	H03AA	Thyroid hormones	3582	276	358061	35081	-0.234233	0.0653727	-3.58304	0.791177	0.696031	0.89933	0.00034	1	0.00205
5yrs	E	J07AL	Pneumococcal vaccines	3793	65	382801	10341	-0.35866	0.123947	-2.89366	0.698612	0.547939	0.890717	0.00381	1	0.0162
5yrs	E	J07AP	Typhoid vaccines	3743	115	378194	14948	-0.207825	0.0900303	-2.30839	0.812349	0.68094	0.969119	0.021	1	0.0652
5yrs	E	J07BB	Influenza vaccines	3320	538	321673	71469	-0.218691	0.0486702	-4.49333	0.80357	0.730458	0.883999	7.01e-06	1	5.79e-05
5yrs	E	J07CA	Bacterial and viral vaccines, combined	3585	273	359745	33397	-0.116978	0.0592778	-1.97339	0.889604	0.792026	0.999205	0.0485	1	0.128
5yrs	E	S01EC	Carbonic anhydrase inhibitors	3825	33	387931	5211	-0.389253	0.191552	-2.03209	0.677563	0.465478	0.986279	0.0421	1	0.114
5yrs	F	A02BA	H2-receptor antagonists [DG:DG01481]	3598	260	24573	2404	-0.156132	0.0727716	-2.14551	0.855446	0.741732	0.986594	0.0319	1	0.151
5yrs	F	A02BC	Proton pump inhibitors [DG:DG01646]	1879	1979	11283	15694	-0.135947	0.0355675	-3.82224	0.872889	0.814109	0.935912	0.000132	1	0.00319
5yrs	F	A03AA	Synthetic anticholinergics, esters with tertiary amino group	3718	140	25655	1322	-0.250623	0.0942734	-2.65847	0.778315	0.647004	0.936277	0.00785	1	0.0582
5yrs	F	A03FA	Propulsives [DG:DG01763]	3737	121	25628	1349	-0.418772	0.104629	-4.00247	0.657854	0.535878	0.807594	6.28e-05	1	0.00227
5yrs	F	A06AC	Bulk-forming laxatives	3801	57	26300	677	-0.414834	0.155716	-2.66405	0.66045	0.486731	0.89617	0.00773	1	0.0582
5yrs	F	A06AD	Osmotically acting laxatives	3165	693	20918	6059	-0.147996	0.0504742	-2.9321	0.862435	0.781197	0.95212	0.00337	1	0.0348
5yrs	F	A07AA	Antibiotics	3703	155	25594	1383	-0.252709	0.0997541	-2.53332	0.776694	0.638757	0.944418	0.0113	1	0.0749
5yrs	F	A07EA	Corticosteroids acting locally	3847	11	26823	154	-0.793481	0.351166	-2.25956	0.452268	0.227233	0.900161	0.0239	1	0.125
5yrs	F	A09AA	Enzyme preparations	3851	7	26776	201	-1.24293	0.411874	-3.01775	0.288536	0.128706	0.646848	0.00255	1	0.0335
5yrs	F	A11EX	Vitamin B-complex, other combinations	3827	31	26624	353	-0.589465	0.232958	-2.53035	0.554624	0.351315	0.87559	0.0114	1	0.0749
5yrs	F	B01AB	Heparin group	3808	50	26409	568	-0.461083	0.168393	-2.73814	0.6306	0.453328	0.877194	0.00618	1	0.0515
5yrs	F	B01AC	Platelet aggregation inhibitors excl. heparin	3164	694	20790	6187	-0.140976	0.0583468	-2.41617	0.868511	0.774655	0.973738	0.0157	1	0.0945
5yrs	F	B01AF	Direct factor Xa inhibitors	3581	277	24310	2667	-0.161337	0.0781329	-2.06491	0.851005	0.730168	0.99184	0.0389	1	0.173
5yrs	F	B03AA	Iron bivalent, oral preparations	3467	391	23737	3240	-0.181491	0.066163	-2.74309	0.834026	0.732587	0.949511	0.00609	1	0.0515
5yrs	F	C01BC	Antiarrhythmics, class Ic [DG:DG01650]	3846	12	26749	228	-0.906962	0.331588	-2.73521	0.403749	0.210791	0.77334	0.00624	1	0.0515
5yrs	F	C05AE	Muscle relaxants	3831	27	26614	363	-0.635122	0.212316	-2.9914	0.529871	0.349494	0.803342	0.00278	1	0.0348
5yrs	F	C05AX	Other agents for treatment of hemorrhoids and anal fissures for topical use	3603	255	24782	2195	-0.276513	0.0720748	-3.83648	0.758424	0.658505	0.873503	0.000125	1	0.00319
5yrs	F	C07AA	Beta blocking agents, non-selective	3738	120	25977	1000	-0.193606	0.0978475	-1.97865	0.823983	0.680185	0.998181	0.0479	1	0.198
5yrs	F	C07AB	Beta blocking agents, selective	3289	569	21591	5386	-0.207175	0.060185	-3.4423	0.812877	0.722426	0.914654	0.000578	1	0.00982
5yrs	F	C09AA	ACE inhibitors, plain [DG:DG01501]	3056	802	20408	6569	-0.123854	0.050683	-2.4437	0.883509	0.799959	0.975785	0.0145	1	0.0894
5yrs	F	C09CA	Angiotensin II receptor blockers, plain [DG:DG01495]	3456	402	23302	3675	-0.177919	0.0664463	-2.67763	0.837011	0.734801	0.953438	0.00742	1	0.0582
5yrs	F	C10AB	Fibrates	3837	21	26690	287	-0.774007	0.297491	-2.60178	0.461161	0.257406	0.826205	0.00928	1	0.0638
5yrs	F	D07AB	Corticosteroids, moderately potent (group II)	3626	232	24868	2109	-0.208722	0.0757864	-2.75408	0.811621	0.699586	0.941598	0.00589	1	0.0515
5yrs	F	D08AC	Biguanides and amidines	3840	18	26766	211	-0.73653	0.296093	-2.4875	0.478772	0.267969	0.855408	0.0129	1	0.0809
5yrs	F	D10AF	Antiinfectives for treatment of acne	3839	19	26806	171	-0.561145	0.253694	-2.21189	0.570555	0.347012	0.938105	0.027	1	0.134
5yrs	F	G03CA	Natural and semisynthetic estrogens, plain	3494	364	23731	3246	-0.314955	0.0596114	-5.28347	0.729822	0.649342	0.820276	1.28e-07	1	9.25e-06
5yrs	F	G04CB	Testosterone-5-alpha reductase inhibitors	3743	115	25705	1272	-0.27533	0.116098	-2.37152	0.759322	0.604782	0.953351	0.0177	1	0.105
5yrs	F	H02AB	Glucocorticoids	3084	774	20443	6534	-0.148976	0.0484297	-3.07613	0.86159	0.783566	0.947383	0.0021	1	0.0303
5yrs	F	H03AA	Thyroid hormones	3582	276	24351	2626	-0.210712	0.0695805	-3.02832	0.810007	0.70674	0.928364	0.00246	1	0.0335
5yrs	F	J01CF	Beta-lactamase resistant penicillins [DG:DG01779]	2990	868	20214	6763	-0.0893116	0.0434601	-2.05502	0.914561	0.839881	0.995881	0.0399	1	0.175
5yrs	F	J01CR	Combinations of penicillins, incl. beta-lactamase inhibitors	3516	342	23760	3217	-0.280425	0.0661886	-4.23676	0.755462	0.663546	0.860112	2.27e-05	1	0.00109
5yrs	F	J01EE	Combinations of sulfonamides and trimethoprim, incl. derivatives	3835	23	26705	272	-0.558681	0.252506	-2.21255	0.571963	0.348679	0.938231	0.0269	1	0.134
5yrs	F	J01FA	Macrolides [DG:DG01551]	3258	600	22187	4790	-0.104513	0.0505032	-2.06943	0.900763	0.815869	0.994491	0.0385	1	0.173
5yrs	F	J01MA	Fluoroquinolones [DG:DG01549]	3676	182	25105	1872	-0.37796	0.0870837	-4.34019	0.685258	0.57773	0.812798	1.43e-05	1	0.000827
5yrs	F	J01XE	Nitrofuran derivatives	3127	731	20697	6280	-0.105933	0.0465035	-2.27795	0.899485	0.821124	0.985325	0.0227	1	0.122
5yrs	F	J01XX	Other antibacterials	3842	16	26715	262	-0.614279	0.291572	-2.10679	0.541031	0.30551	0.958116	0.0351	1	0.163
5yrs	F	J07AL	Pneumococcal vaccines	3793	65	26224	753	-0.491997	0.129587	-3.79667	0.611404	0.474263	0.788201	0.000147	1	0.00327
5yrs	F	J07AM	Tetanus vaccines	3836	22	26584	393	-0.802824	0.215362	-3.72779	0.448062	0.293775	0.683379	0.000193	1	0.00373
5yrs	F	J07AP	Typhoid vaccines	3743	115	25942	1035	-0.362533	0.0960097	-3.776	0.695911	0.576537	0.840003	0.00016	1	0.0033
5yrs	F	J07BB	Influenza vaccines	3320	538	20551	6426	-0.412444	0.0511485	-8.06365	0.66203	0.598878	0.731842	7.67e-16	1	1.11e-13
5yrs	F	J07CA	Bacterial and viral vaccines, combined	3585	273	24839	2138	-0.147252	0.06389	-2.30478	0.863076	0.761489	0.978215	0.0212	1	0.117
5yrs	F	L01BC	Pyrimidine analogues	3773	85	25916	1061	-0.273171	0.118743	-2.30052	0.760963	0.602956	0.960376	0.0214	1	0.117
5yrs	F	L02AE	Gonadotropin releasing hormone analogues	3825	33	26501	476	-0.69015	0.218766	-3.15474	0.501501	0.326626	0.770004	0.00161	1	0.0245
5yrs	F	L02BA	Anti-estrogens	3836	22	26747	230	-0.480365	0.220227	-2.18123	0.618558	0.401713	0.952456	0.0292	1	0.143
5yrs	F	L02BB	Anti-androgens	3843	15	26749	228	-0.608968	0.289822	-2.10118	0.543912	0.308192	0.959921	0.0356	1	0.163
5yrs	F	M01AB	Acetic acid derivatives and related substances	3764	94	26217	760	-0.29928	0.113476	-2.6374	0.741352	0.593512	0.926016	0.00836	1	0.0604
5yrs	F	N01BB	Amides	3635	223	24870	2107	-0.197734	0.0752842	-2.62651	0.820588	0.708012	0.951064	0.00863	1	0.0608
5yrs	F	N01BX	Other local anesthetics	3788	70	26229	748	-0.276458	0.140183	-1.97212	0.758466	0.576245	0.998309	0.0486	1	0.198
5yrs	F	N02AX	Other opioids	3530	328	24025	2952	-0.264798	0.0691882	-3.82722	0.767361	0.670045	0.87881	0.00013	1	0.00319
5yrs	F	N03AX	Other antiepileptics	3354	504	22739	4238	-0.235674	0.0575123	-4.09779	0.790039	0.705816	0.884311	4.18e-05	1	0.00173
5yrs	F	N05AB	Phenothiazines with piperazine structure	3588	270	24495	2482	-0.138754	0.0686308	-2.02174	0.870442	0.760885	0.995774	0.0432	1	0.181
5yrs	F	N05CF	Benzodiazepine related drugs	3602	256	24827	2150	-0.185859	0.0738772	-2.51578	0.830391	0.718449	0.959775	0.0119	1	0.0763
5yrs	F	N06AA	Non-selective monoamine reuptake inhibitors [DG:DG01730]	3220	638	21791	5186	-0.131163	0.0492122	-2.66526	0.877075	0.796426	0.96589	0.0077	1	0.0582
5yrs	F	R03BA	Glucocorticoids	3574	284	24722	2255	-0.14993	0.0734624	-2.04091	0.860768	0.745337	0.994077	0.0413	1	0.175
5yrs	F	R03DC	Leukotriene receptor antagonists	3797	61	26347	630	-0.513457	0.156123	-3.2888	0.598423	0.440668	0.812654	0.00101	1	0.0162
5yrs	F	R05DA	Opium alkaloids and derivatives	3224	634	21712	5265	-0.179063	0.0502041	-3.5667	0.836053	0.757702	0.922507	0.000362	1	0.00654
5yrs	F	S01EA	Sympathomimetics in glaucoma therapy	3850	8	26812	165	-1.03319	0.439791	-2.34927	0.355871	0.150289	0.84267	0.0188	1	0.107
5yrs	F	S01EC	Carbonic anhydrase inhibitors	3825	33	26465	512	-0.569322	0.198617	-2.86643	0.565909	0.383422	0.83525	0.00415	1	0.0414
5yrs	F	S01ED	Beta blocking agents	3814	44	26358	619	-0.501595	0.17024	-2.9464	0.605564	0.433757	0.845423	0.00322	1	0.0348
5yrs	G	A02BC	Proton pump inhibitors [DG:DG01646]	612	706	11283	15694	-0.254098	0.0620616	-4.09429	0.775616	0.68678	0.875943	4.25e-05	1	0.0012
5yrs	G	A03AA	Synthetic anticholinergics, esters with tertiary amino group	1278	40	25655	1322	-0.608422	0.188877	-3.22126	0.544209	0.375826	0.788034	0.00128	1	0.023
5yrs	G	B01AC	Platelet aggregation inhibitors excl. heparin	991	327	20790	6187	-0.210636	0.0917811	-2.29498	0.810069	0.676697	0.969727	0.0217	1	0.189
5yrs	G	C05AE	Muscle relaxants	1307	11	26614	363	-0.721892	0.361652	-1.9961	0.485832	0.23913	0.987048	0.0459	1	0.287
5yrs	G	C05AX	Other agents for treatment of hemorrhoids and anal fissures for topical use	1223	95	24782	2195	-0.288872	0.123623	-2.33672	0.749108	0.587911	0.954503	0.0195	1	0.177
5yrs	G	C07AB	Beta blocking agents, selective	1048	270	21591	5386	-0.192178	0.0940904	-2.04248	0.82516	0.686191	0.992274	0.0411	1	0.266
5yrs	G	C08CA	Dihydropyridine derivatives [DG:DG01928]	967	351	19950	7027	-0.200535	0.0800276	-2.50582	0.818293	0.699498	0.957263	0.0122	1	0.128
5yrs	G	C09AA	ACE inhibitors, plain [DG:DG01501]	1005	313	20408	6569	-0.304547	0.0842192	-3.61613	0.737457	0.625239	0.869816	0.0003	1	0.00686
5yrs	G	C09CA	Angiotensin II receptor blockers, plain [DG:DG01495]	1153	165	23302	3675	-0.316171	0.107556	-2.9396	0.728935	0.590382	0.900003	0.00329	1	0.0518
5yrs	G	C10AA	HMG CoA reductase inhibitors [DG:DG01660]	744	574	14700	12277	-0.376959	0.0723457	-5.21052	0.685944	0.595258	0.790446	1.9e-07	1	1.2e-05
5yrs	G	G03CA	Natural and semisynthetic estrogens, plain	1226	92	23731	3246	-0.44203	0.117485	-3.76244	0.642731	0.51053	0.809164	0.000169	1	0.00425
5yrs	G	G04CB	Testosterone-5-alpha reductase inhibitors	1268	50	25705	1272	-0.467346	0.186503	-2.50584	0.626663	0.434787	0.903217	0.0122	1	0.128
5yrs	G	H03AA	Thyroid hormones	1232	86	24351	2626	-0.450029	0.129637	-3.47145	0.637609	0.494541	0.822067	0.000518	1	0.0109
5yrs	G	J07AL	Pneumococcal vaccines	1294	24	26224	753	-0.475458	0.225542	-2.10807	0.6216	0.399504	0.967167	0.035	1	0.252
5yrs	G	J07BB	Influenza vaccines	1090	228	20551	6426	-0.368785	0.0826429	-4.46239	0.691574	0.588153	0.813182	8.14e-06	1	0.000293
5yrs	G	J07CA	Bacterial and viral vaccines, combined	1240	78	24839	2138	-0.266595	0.120506	-2.21229	0.765983	0.604839	0.970061	0.027	1	0.208
5yrs	G	R03BA	Glucocorticoids	1227	91	24722	2255	-0.312036	0.133416	-2.33882	0.731955	0.563529	0.950721	0.0193	1	0.177
5yrs	G	R03DC	Leukotriene receptor antagonists	1296	22	26347	630	-0.524884	0.263907	-1.9889	0.591624	0.352694	0.992415	0.0467	1	0.287
5yrs	G	S01ED	Beta blocking agents	1303	15	26358	619	-0.883224	0.318897	-2.76962	0.413448	0.221291	0.772463	0.00562	1	0.0735
5yrs	G	S01EE	Prostaglandin analogues	1287	31	25941	1036	-0.641052	0.225353	-2.84465	0.526738	0.338661	0.819265	0.00445	1	0.0659
5yrs	H	G04CB	Testosterone-5-alpha reductase inhibitors	163	7	25705	1272	-1.32819	0.568224	-2.33745	0.264955	0.0869918	0.806989	0.0194	1	0.112
5yrs	H	J07BB	Influenza vaccines	147	23	20551	6426	-0.815675	0.250399	-3.25751	0.442341	0.270774	0.722614	0.00112	1	0.0107

## Sheet: b) summary by freq
drug	Full name	Frequency of being nominally significant (p<0.05)
C09AA	ACE inhibitors, plain [DG:DG01501]	21
J07BB	Influenza vaccines	20
C10AA	HMG CoA reductase inhibitors [DG:DG01660]	19
H03AA	Thyroid hormones	17
C09CA	Angiotensin II receptor blockers, plain [DG:DG01495]	15
G04CB	Testosterone-5-alpha reductase inhibitors	12
A02BC	Proton pump inhibitors [DG:DG01646]	11
C08CA	Dihydropyridine derivatives [DG:DG01928]	11
S01ED	Beta blocking agents	11
S01EE	Prostaglandin analogues	11
R03BA	Glucocorticoids	9
C07AB	Beta blocking agents, selective	8
A10BA	Biguanides [DG:DG01684]	7
B01AC	Platelet aggregation inhibitors excl. heparin	7
G03CA	Natural and semisynthetic estrogens, plain	7
J07CA	Bacterial and viral vaccines, combined	7
A03AA	Synthetic anticholinergics, esters with tertiary amino group	6
A10AE	Insulins and analogues for injection, long-acting	5
C05AX	Other agents for treatment of hemorrhoids and anal fissures for topical use	5
C08DB	Benzothiazepine derivatives	5
J07AL	Pneumococcal vaccines	5
N02AX	Other opioids	5
R03DC	Leukotriene receptor antagonists	5
S01EC	Carbonic anhydrase inhibitors	5
S01XA	Other ophthalmologicals	5
A09AA	Enzyme preparations	4
J01MA	Fluoroquinolones [DG:DG01549]	4
L02AE	Gonadotropin releasing hormone analogues	4
L02BA	Anti-estrogens	4
M01AE	Propionic acid derivatives	4
N03AX	Other antiepileptics	4
N06AA	Non-selective monoamine reuptake inhibitors [DG:DG01730]	4
R01AD	Corticosteroids	4
R05DA	Opium alkaloids and derivatives	4
A02BA	H2-receptor antagonists [DG:DG01481]	3
A03FA	Propulsives [DG:DG01763]	3
A06AC	Bulk-forming laxatives	3
A12AX	Calcium, combinations with vitamin D and/or other drugs	3
B01AF	Direct factor Xa inhibitors	3
B03AA	Iron bivalent, oral preparations	3
C01BC	Antiarrhythmics, class Ic [DG:DG01650]	3
C05AE	Muscle relaxants	3
J01XX	Other antibacterials	3
J07AP	Typhoid vaccines	3
L01BC	Pyrimidine analogues	3
A06AD	Osmotically acting laxatives	2
A11EX	Vitamin B-complex, other combinations	2
B01AB	Heparin group	2
C10AB	Fibrates	2
H02AB	Glucocorticoids	2
J01CR	Combinations of penicillins, incl. beta-lactamase inhibitors	2
J01DB	First-generation cephalosporins [DG:DG01774]	2
J01EA	Trimethoprim and derivatives [DG:DG01581]	2
L02BB	Anti-androgens	2
M01AB	Acetic acid derivatives and related substances	2
N01BX	Other local anesthetics	2
N05CF	Benzodiazepine related drugs	2
A03AX	Other drugs for functional gastrointestinal disorders	1
A04AA	Serotonin (5HT3) antagonists	1
A06AX	Other drugs for constipation	1
A07AA	Antibiotics	1
A07EA	Corticosteroids acting locally	1
A07EC	Aminosalicylic acid and similar agents	1
A10BJ	Glucagon-like peptide-1 receptor (GLP-1) analogues	1
B05BB	Solutions affecting the electrolyte balance	1
C03DA	Aldosterone antagonists	1
C07AA	Beta blocking agents, non-selective	1
D02AC	Soft paraffin and fat products	1
D05AX	Other antipsoriatics for topical use	1
D06AX	Other antibiotics for topical use	1
D07AB	Corticosteroids, moderately potent (group II)	1
D08AC	Biguanides and amidines	1
D10AF	Antiinfectives for treatment of acne	1
J01CF	Beta-lactamase resistant penicillins [DG:DG01779]	1
J01EE	Combinations of sulfonamides and trimethoprim, incl. derivatives	1
J01FA	Macrolides [DG:DG01551]	1
J01XE	Nitrofuran derivatives	1
J07AM	Tetanus vaccines	1
J07BC	Hepatitis vaccines	1
M02AC	Preparations with salicylic acid derivatives	1
N01BB	Amides	1
N02CX	Other antimigraine preparations	1
N05AB	Phenothiazines with piperazine structure	1
N07BB	Drugs used in alcohol dependence	1
N07CA	Antivertigo preparations	1
R03AC	Selective beta-2-adrenoreceptor agonists	1
S01BA	Corticosteroids, plain	1
S01BC	Antiinflammatory agents, non-steroids	1
S01EA	Sympathomimetics in glaucoma therapy	1
S03BA	Corticosteroids	1
V07AY	Other non-therapeutic auxiliary products	1
