# Supplementary material for: Exploring Drugs and Vaccines Associated with Altered Risks and Severity of COVID-19: A UK Biobank Cohort Study of All ATC Level-4 Drug Categories Reveals Repositioning Opportunities
Source: Pharmaceutics. 2021 Sep 18;13(9):1514. doi: 10.3390/pharmaceutics13091514 (PMC8471264; doi:10.3390/pharmaceutics13091514)
Supplement: Supplementary file 1 [file pharmaceutics-13-01514-s001.zip › Table S4 all vaccine associations updated11Jan.xlsx]

## Sheet: all_protective_assoc vaccines
Window	Model	drug	Full name	case_notx	case_tx	ctrl_notx	ctrl_tx	estimate	std.error	statistic	OR	conf.low	conf.high	p	sig	p.adj
1yrs	A	J07AL	Pneumococcal vaccines	1312	6	2528	12	-0.264994	0.53125	-0.498813	0.76721	0.270751	2.17399	0.618	0	0.8
1yrs	A	J07BB	Influenza vaccines	1189	129	2365	175	0.0324	0.135444	0.239214	1.03293	0.792036	1.34709	0.811	0	0.896
1yrs	A	J07CA	Bacterial and viral vaccines, combined	1310	8	2521	19	-0.324638	0.476693	-0.68102	0.722789	0.283871	1.84036	0.496	0	0.703
1yrs	B	J07BB	Influenza vaccines	162	8	3392	296	-0.968242	0.425793	-2.27397	0.37975	0.164797	0.87508	0.023	1	0.101
1yrs	C	J07AL	Pneumococcal vaccines	1312	6	391126	2016	-0.123492	0.437184	-0.282472	0.883829	0.375176	2.0821	0.778	0	0.841
1yrs	C	J07BB	Influenza vaccines	1189	129	346811	46331	-0.301061	0.104017	-2.89434	0.740033	0.603547	0.907383	0.0038	1	0.0108
1yrs	C	J07CA	Bacterial and viral vaccines, combined	1310	8	390013	3129	-0.373327	0.403223	-0.925858	0.68844	0.31235	1.51737	0.354	0	0.496
1yrs	D	J07BB	Influenza vaccines	162	8	346811	46331	-1.26358	0.407339	-3.10204	0.28264	0.127205	0.628003	0.00192	1	0.00468
1yrs	E	J07AL	Pneumococcal vaccines	3840	18	391126	2016	-0.101881	0.237626	-0.428744	0.903137	0.566873	1.43887	0.668	0	0.775
1yrs	E	J07AP	Typhoid vaccines	3846	12	391750	1392	0.069843	0.252687	0.276401	1.07234	0.653498	1.75963	0.782	0	0.854
1yrs	E	J07BB	Influenza vaccines	3554	304	346811	46331	-0.312048	0.0624907	-4.99352	0.731946	0.64757	0.827316	5.93e-07	1	4.5e-06
1yrs	E	J07BC	Hepatitis vaccines	3852	6	392209	933	-0.163156	0.335969	-0.48563	0.849458	0.439708	1.64104	0.627	0	0.743
1yrs	E	J07CA	Bacterial and viral vaccines, combined	3831	27	390013	3129	-0.177374	0.190978	-0.928766	0.837467	0.575979	1.21767	0.353	0	0.55
1yrs	F	J07AL	Pneumococcal vaccines	3840	18	26744	233	-0.687357	0.246475	-2.78876	0.502903	0.310225	0.815253	0.00529	1	0.0465
1yrs	F	J07AP	Typhoid vaccines	3846	12	26847	130	-0.44708	0.267933	-1.66863	0.639493	0.378235	1.08121	0.0952	0	0.309
1yrs	F	J07BB	Influenza vaccines	3554	304	22905	4072	-0.51536	0.0652543	-7.89772	0.597285	0.525575	0.678779	2.94e-15	1	6.97e-13
1yrs	F	J07BC	Hepatitis vaccines	3852	6	26897	80	-0.496562	0.356086	-1.3945	0.60862	0.302854	1.22309	0.163	0	0.444
1yrs	F	J07CA	Bacterial and viral vaccines, combined	3831	27	26709	268	-0.574266	0.201116	-2.8554	0.563118	0.379667	0.835211	0.0043	1	0.0397
1yrs	G	J07AL	Pneumococcal vaccines	1312	6	26744	233	-0.683212	0.442566	-1.54375	0.504992	0.212107	1.2023	0.123	0	0.367
1yrs	G	J07BB	Influenza vaccines	1189	129	22905	4072	-0.48616	0.105806	-4.59484	0.614983	0.499802	0.75671	4.35e-06	1	0.000109
1yrs	G	J07CA	Bacterial and viral vaccines, combined	1310	8	26709	268	-0.739964	0.408153	-1.81296	0.477131	0.214389	1.06187	0.0698	0	0.274
1yrs	H	J07BB	Influenza vaccines	162	8	22905	4072	-1.4502	0.409877	-3.53813	0.234524	0.105023	0.52371	0.000404	1	0.00332
2yrs	A	J07AL	Pneumococcal vaccines	1305	13	2516	24	-0.252953	0.361483	-0.699765	0.776504	0.382253	1.57738	0.484	0	0.743
2yrs	A	J07AP	Typhoid vaccines	1302	16	2518	22	0.537613	0.323448	1.66213	1.71192	0.907979	3.22767	0.0966	0	0.334
2yrs	A	J07BB	Influenza vaccines	1161	157	2323	217	-0.00697304	0.122438	-0.0569515	0.993051	0.781122	1.26248	0.955	0	0.977
2yrs	A	J07BC	Hepatitis vaccines	1312	6	2526	14	0.324236	0.450854	0.719159	1.38297	0.57138	3.34737	0.472	0	0.742
2yrs	A	J07CA	Bacterial and viral vaccines, combined	1295	23	2482	58	-0.186427	0.258624	-0.720845	0.829919	0.499833	1.37799	0.471	0	0.742
2yrs	B	J07BB	Influenza vaccines	160	10	3324	364	-1.0025	0.376314	-2.66399	0.366962	0.175469	0.767434	0.00775	1	0.0529
2yrs	C	J07AL	Pneumococcal vaccines	1305	13	387752	5390	-0.285721	0.294283	-0.970907	0.751472	0.422103	1.33785	0.332	0	0.459
2yrs	C	J07AP	Typhoid vaccines	1302	16	388598	4544	0.328875	0.233644	1.40759	1.3894	0.878922	2.19638	0.159	0	0.297
2yrs	C	J07BB	Influenza vaccines	1161	157	342364	50778	-0.291022	0.0942398	-3.0881	0.747499	0.621432	0.899142	0.00201	1	0.00727
2yrs	C	J07BC	Hepatitis vaccines	1312	6	390235	2907	-0.180974	0.369356	-0.48997	0.834457	0.404582	1.72108	0.624	0	0.723
2yrs	C	J07CA	Bacterial and viral vaccines, combined	1295	23	382676	10466	-0.354172	0.219534	-1.61329	0.701755	0.45637	1.07908	0.107	0	0.215
2yrs	D	J07BB	Influenza vaccines	160	10	342364	50778	-1.20902	0.357566	-3.38124	0.298491	0.148105	0.601579	0.000722	1	0.0023
2yrs	E	J07AL	Pneumococcal vaccines	3821	37	387752	5390	-0.281577	0.162345	-1.73443	0.754593	0.548938	1.03729	0.0828	0	0.201
2yrs	E	J07AP	Typhoid vaccines	3820	38	388598	4544	-0.0729627	0.150579	-0.484546	0.929635	0.692052	1.24878	0.628	0	0.775
2yrs	E	J07BB	Influenza vaccines	3484	374	342364	50778	-0.282029	0.0560364	-5.03296	0.754252	0.6758	0.841811	4.83e-07	1	4.83e-06
2yrs	E	J07BC	Hepatitis vaccines	3838	20	390235	2907	-0.266343	0.199155	-1.33736	0.766176	0.51857	1.13201	0.181	0	0.351
2yrs	E	J07CA	Bacterial and viral vaccines, combined	3777	81	382676	10466	-0.21593	0.107107	-2.01602	0.805792	0.65321	0.994015	0.0438	1	0.127
2yrs	F	J07AL	Pneumococcal vaccines	3821	37	26541	436	-0.535441	0.169536	-3.15827	0.585411	0.4199	0.816161	0.00159	1	0.0217
2yrs	F	J07AP	Typhoid vaccines	3820	38	26631	346	-0.364335	0.160444	-2.27079	0.694658	0.507219	0.951364	0.0232	1	0.128
2yrs	F	J07BB	Influenza vaccines	3484	374	22138	4839	-0.477184	0.0586805	-8.13189	0.620529	0.553109	0.696166	4.38e-16	1	1.14e-13
2yrs	F	J07BC	Hepatitis vaccines	3838	20	26766	211	-0.438476	0.211932	-2.06895	0.645019	0.425763	0.977184	0.0386	1	0.173
2yrs	F	J07CA	Bacterial and viral vaccines, combined	3777	81	26262	715	-0.338569	0.114285	-2.9625	0.712789	0.569742	0.891753	0.00305	1	0.0359
2yrs	G	J07AL	Pneumococcal vaccines	1305	13	26541	436	-0.516162	0.29857	-1.72878	0.596806	0.332414	1.07149	0.0839	0	0.335
2yrs	G	J07AP	Typhoid vaccines	1302	16	26631	346	0.0735797	0.240727	0.305656	1.07635	0.671489	1.72533	0.76	0	0.929
2yrs	G	J07BB	Influenza vaccines	1161	157	22138	4839	-0.471735	0.0959481	-4.91656	0.623919	0.516956	0.753014	8.86e-07	1	2.78e-05
2yrs	G	J07BC	Hepatitis vaccines	1312	6	26766	211	-0.372077	0.376781	-0.987514	0.689301	0.329366	1.44258	0.323	0	0.678
2yrs	G	J07CA	Bacterial and viral vaccines, combined	1295	23	26262	715	-0.479275	0.223322	-2.14612	0.619232	0.399718	0.959297	0.0319	1	0.176
2yrs	H	J07BB	Influenza vaccines	160	10	22138	4839	-1.40449	0.360127	-3.89998	0.245493	0.121195	0.497271	9.64e-05	1	0.000911
5yrs	A	J07AL	Pneumococcal vaccines	1294	24	2499	41	-0.196177	0.274748	-0.714025	0.821867	0.47958	1.40845	0.475	0	0.768
5yrs	A	J07AM	Tetanus vaccines	1306	12	2530	10	0.642475	0.432153	1.48668	1.90118	0.814813	4.43598	0.137	0	0.429
5yrs	A	J07AP	Typhoid vaccines	1282	36	2461	79	-0.0422608	0.207106	-0.204054	0.95862	0.638707	1.43877	0.838	0	0.941
5yrs	A	J07BB	Influenza vaccines	1090	228	2230	310	0.0510648	0.105941	0.482013	1.05239	0.855011	1.29534	0.63	0	0.854
5yrs	A	J07BC	Hepatitis vaccines	1293	25	2469	71	-0.113102	0.231624	-0.488299	0.89306	0.5671	1.40638	0.625	0	0.854
5yrs	A	J07CA	Bacterial and viral vaccines, combined	1240	78	2345	195	-0.199886	0.14188	-1.40884	0.818824	0.619989	1.08143	0.159	0	0.46
5yrs	B	J07BB	Influenza vaccines	147	23	3173	515	-0.479086	0.265989	-1.80115	0.619349	0.367666	1.04332	0.0718	0	0.308
5yrs	C	J07AL	Pneumococcal vaccines	1294	24	382801	10341	-0.365685	0.22212	-1.64634	0.693721	0.448865	1.07215	0.0997	0	0.211
5yrs	C	J07AM	Tetanus vaccines	1306	12	389470	3672	0.0873151	0.296044	0.29494	1.09124	0.610839	1.94946	0.768	0	0.872
5yrs	C	J07AP	Typhoid vaccines	1282	36	378194	14948	-0.146202	0.164187	-0.890461	0.863983	0.626251	1.19196	0.373	0	0.528
5yrs	C	J07BB	Influenza vaccines	1090	228	321673	71469	-0.18668	0.0810577	-2.30305	0.829709	0.70783	0.972574	0.0213	1	0.0577
5yrs	C	J07BC	Hepatitis vaccines	1293	25	383851	9291	-0.0347832	0.19364	-0.179628	0.965815	0.660795	1.41163	0.857	0	0.933
5yrs	C	J07CA	Bacterial and viral vaccines, combined	1240	78	359745	33397	-0.229474	0.118007	-1.94457	0.794952	0.630801	1.00182	0.0518	0	0.123
5yrs	D	J07BB	Influenza vaccines	147	23	321673	71469	-0.639822	0.247724	-2.5828	0.527386	0.324538	0.857023	0.0098	1	0.0383
5yrs	E	J07AL	Pneumococcal vaccines	3793	65	382801	10341	-0.35866	0.123947	-2.89366	0.698612	0.547939	0.890717	0.00381	1	0.0162
5yrs	E	J07AM	Tetanus vaccines	3836	22	389470	3672	-0.310001	0.209175	-1.48201	0.733446	0.486763	1.10514	0.138	0	0.275
5yrs	E	J07AP	Typhoid vaccines	3743	115	378194	14948	-0.207825	0.0900303	-2.30839	0.812349	0.68094	0.969119	0.021	1	0.0652
5yrs	E	J07BB	Influenza vaccines	3320	538	321673	71469	-0.218691	0.0486702	-4.49333	0.80357	0.730458	0.883999	7.01e-06	1	5.79e-05
5yrs	E	J07BC	Hepatitis vaccines	3762	96	383851	9291	0.0804267	0.0956483	0.840858	1.08375	0.898489	1.30721	0.4	0	0.567
5yrs	E	J07BG	Rabies vaccines	3853	5	392685	457	0.176938	0.419768	0.421513	1.19356	0.524246	2.71739	0.673	0	0.781
5yrs	E	J07CA	Bacterial and viral vaccines, combined	3585	273	359745	33397	-0.116978	0.0592778	-1.97339	0.889604	0.792026	0.999205	0.0485	1	0.128
5yrs	F	J07AL	Pneumococcal vaccines	3793	65	26224	753	-0.491997	0.129587	-3.79667	0.611404	0.474263	0.788201	0.000147	1	0.00327
5yrs	F	J07AM	Tetanus vaccines	3836	22	26584	393	-0.802824	0.215362	-3.72779	0.448062	0.293775	0.683379	0.000193	1	0.00373
5yrs	F	J07AP	Typhoid vaccines	3743	115	25942	1035	-0.362533	0.0960097	-3.776	0.695911	0.576537	0.840003	0.00016	1	0.0033
5yrs	F	J07BB	Influenza vaccines	3320	538	20551	6426	-0.412444	0.0511485	-8.06365	0.66203	0.598878	0.731842	7.67e-16	1	1.11e-13
5yrs	F	J07BC	Hepatitis vaccines	3762	96	26300	677	-0.0715334	0.103918	-0.688361	0.930965	0.759407	1.14128	0.491	0	0.744
5yrs	F	J07BG	Rabies vaccines	3853	5	26953	24	0.399113	0.468984	0.851016	1.4905	0.594452	3.73722	0.395	0	0.66
5yrs	F	J07CA	Bacterial and viral vaccines, combined	3585	273	24839	2138	-0.147252	0.06389	-2.30478	0.863076	0.761489	0.978215	0.0212	1	0.117
5yrs	G	J07AL	Pneumococcal vaccines	1294	24	26224	753	-0.475458	0.225542	-2.10807	0.6216	0.399504	0.967167	0.035	1	0.252
5yrs	G	J07AM	Tetanus vaccines	1306	12	26584	393	-0.398383	0.301088	-1.32314	0.671405	0.372123	1.21139	0.186	0	0.578
5yrs	G	J07AP	Typhoid vaccines	1282	36	25942	1035	-0.275088	0.167661	-1.64074	0.759505	0.546778	1.055	0.101	0	0.444
5yrs	G	J07BB	Influenza vaccines	1090	228	20551	6426	-0.368785	0.0826429	-4.46239	0.691574	0.588153	0.813182	8.14e-06	1	0.000293
5yrs	G	J07BC	Hepatitis vaccines	1293	25	26300	677	-0.203237	0.19813	-1.02577	0.816085	0.553451	1.20335	0.305	0	0.689
5yrs	G	J07CA	Bacterial and viral vaccines, combined	1240	78	24839	2138	-0.266595	0.120506	-2.21229	0.765983	0.604839	0.970061	0.027	1	0.208
5yrs	H	J07BB	Influenza vaccines	147	23	20551	6426	-0.815675	0.250399	-3.25751	0.442341	0.270774	0.722614	0.00112	1	0.0107
10yrs	A	J07AL	Pneumococcal vaccines	1253	65	2435	105	-0.0650228	0.171479	-0.379188	0.937046	0.669502	1.31151	0.705	0	0.822
10yrs	A	J07AM	Tetanus vaccines	1303	15	2526	14	0.589452	0.37482	1.57262	1.803	0.864664	3.75962	0.116	0	0.406
10yrs	A	J07AP	Typhoid vaccines	1248	70	2380	160	-0.102403	0.15259	-0.671098	0.902666	0.66927	1.21745	0.502	0	0.822
10yrs	A	J07BB	Influenza vaccines	1034	284	2143	397	0.0493174	0.0973046	0.506836	1.05055	0.868093	1.27137	0.612	0	0.822
10yrs	A	J07BC	Hepatitis vaccines	1246	72	2378	162	-0.0181315	0.151161	-0.119948	0.982032	0.730157	1.32079	0.904	0	0.904
10yrs	A	J07BL	Yellow fever vaccines	1313	5	2531	9	0.563616	0.496197	1.13587	1.75701	0.664168	4.64807	0.256	0	0.598
10yrs	A	J07CA	Bacterial and viral vaccines, combined	1145	173	2131	409	-0.173049	0.102403	-1.68988	0.841097	0.688102	1.02811	0.0911	0	0.406
10yrs	B	J07AL	Pneumococcal vaccines	159	11	3529	159	0.398804	0.343559	1.1608	1.49004	0.759745	2.92232	0.246	0	0.369
10yrs	B	J07BB	Influenza vaccines	137	33	3040	648	-0.322507	0.23433	-1.3763	0.724331	0.457522	1.14673	0.169	0	0.369
10yrs	B	J07CA	Bacterial and viral vaccines, combined	152	18	3124	564	-0.268647	0.313482	-0.85698	0.764413	0.413435	1.41334	0.392	0	0.392
10yrs	C	J07AL	Pneumococcal vaccines	1253	65	366548	26594	-0.25218	0.135137	-1.86611	0.777105	0.59628	1.01276	0.062	0	0.145
10yrs	C	J07AM	Tetanus vaccines	1303	15	387493	5649	-0.0978769	0.263573	-0.371347	0.906761	0.540927	1.52001	0.71	0	0.829
10yrs	C	J07AP	Typhoid vaccines	1248	70	364435	28707	-0.196634	0.123034	-1.59821	0.821491	0.64547	1.04551	0.11	0	0.193
10yrs	C	J07BB	Influenza vaccines	1034	284	303160	89982	-0.189443	0.0751094	-2.52222	0.82742	0.714155	0.958649	0.0117	1	0.0816
10yrs	C	J07BC	Hepatitis vaccines	1246	72	369613	23529	0.00491637	0.122413	0.0401621	1.00493	0.790563	1.27742	0.968	0	0.968
10yrs	C	J07BL	Yellow fever vaccines	1313	5	391127	2015	0.266642	0.373623	0.713665	1.30557	0.627728	2.71538	0.475	0	0.666
10yrs	C	J07CA	Bacterial and viral vaccines, combined	1145	173	325108	68034	-0.185938	0.0839763	-2.21417	0.830325	0.704316	0.97888	0.0268	1	0.0939
10yrs	D	J07AL	Pneumococcal vaccines	159	11	366548	26594	0.200096	0.319673	0.625941	1.22152	0.652821	2.28564	0.531	0	0.531
10yrs	D	J07BB	Influenza vaccines	137	33	303160	89982	-0.527085	0.217001	-2.42895	0.590324	0.385814	0.903238	0.0151	1	0.0454
10yrs	D	J07CA	Bacterial and viral vaccines, combined	152	18	325108	68034	-0.363613	0.29506	-1.23234	0.69516	0.389878	1.23948	0.218	0	0.327
10yrs	E	J07AH	Meningococcal vaccines	3847	11	392320	822	-0.0251767	0.315127	-0.0798938	0.975138	0.525809	1.80844	0.936	0	0.936
10yrs	E	J07AL	Pneumococcal vaccines	3688	170	366548	26594	-0.247006	0.0795102	-3.1066	0.781136	0.668416	0.912864	0.00189	1	0.00852
10yrs	E	J07AM	Tetanus vaccines	3829	29	387493	5649	-0.438222	0.181949	-2.40849	0.645183	0.451655	0.921633	0.016	1	0.0423
10yrs	E	J07AP	Typhoid vaccines	3628	230	364435	28707	-0.153182	0.0651927	-2.34967	0.857974	0.755061	0.974914	0.0188	1	0.0423
10yrs	E	J07BB	Influenza vaccines	3177	681	303160	89982	-0.201308	0.0447038	-4.50316	0.81766	0.749067	0.892535	6.7e-06	1	6.03e-05
10yrs	E	J07BC	Hepatitis vaccines	3624	234	369613	23529	0.0153091	0.0644161	0.23766	1.01543	0.894989	1.15207	0.812	0	0.914
10yrs	E	J07BG	Rabies vaccines	3847	11	391772	1370	-0.115536	0.285802	-0.404251	0.890889	0.508801	1.55991	0.686	0	0.908
10yrs	E	J07BL	Yellow fever vaccines	3844	14	391127	2015	-0.088616	0.234966	-0.377145	0.915197	0.577445	1.4505	0.706	0	0.908
10yrs	E	J07CA	Bacterial and viral vaccines, combined	3276	582	325108	68034	-0.0947669	0.0434021	-2.18346	0.909585	0.835409	0.990347	0.029	1	0.0522
10yrs	F	J07AH	Meningococcal vaccines	3847	11	26914	63	-0.212017	0.343116	-0.617915	0.808951	0.412905	1.58487	0.537	0	0.604
10yrs	F	J07AL	Pneumococcal vaccines	3688	170	24839	2138	-0.407418	0.0830612	-4.90504	0.665366	0.5654	0.783006	9.39e-07	1	4.23e-06
10yrs	F	J07AM	Tetanus vaccines	3829	29	26495	482	-0.707346	0.188038	-3.76172	0.492951	0.340988	0.712637	0.000169	1	0.00038
10yrs	F	J07AP	Typhoid vaccines	3628	230	24963	2014	-0.268409	0.0697129	-3.85021	0.764595	0.666944	0.876543	0.000118	1	0.000355
10yrs	F	J07BB	Influenza vaccines	3177	681	19029	7948	-0.395086	0.047102	-8.38787	0.673622	0.614217	0.738774	5.16e-17	1	4.64e-16
10yrs	F	J07BC	Hepatitis vaccines	3624	234	25246	1731	-0.145499	0.0696416	-2.08926	0.86459	0.754274	0.991041	0.0367	1	0.055
10yrs	F	J07BG	Rabies vaccines	3847	11	26896	81	-0.198513	0.306954	-0.64672	0.819949	0.449259	1.4965	0.518	0	0.604
10yrs	F	J07BL	Yellow fever vaccines	3844	14	26847	130	-0.130169	0.251978	-0.516589	0.877947	0.535767	1.43867	0.605	0	0.605
10yrs	F	J07CA	Bacterial and viral vaccines, combined	3276	582	22409	4568	-0.15719	0.0468043	-3.35844	0.854542	0.779636	0.936645	0.000785	1	0.00141
10yrs	G	J07AL	Pneumococcal vaccines	1253	65	24839	2138	-0.40361	0.137435	-2.93673	0.667905	0.510181	0.874389	0.00332	1	0.0092
10yrs	G	J07AM	Tetanus vaccines	1303	15	26495	482	-0.348163	0.268322	-1.29756	0.705984	0.417243	1.19454	0.195	0	0.252
10yrs	G	J07AP	Typhoid vaccines	1248	70	24963	2014	-0.30222	0.125577	-2.40665	0.739176	0.577899	0.945461	0.0161	1	0.0282
10yrs	G	J07BB	Influenza vaccines	1034	284	19029	7948	-0.375271	0.0766449	-4.89624	0.687103	0.59126	0.798481	9.82e-07	1	6.87e-06
10yrs	G	J07BC	Hepatitis vaccines	1246	72	25246	1731	-0.155168	0.125339	-1.23799	0.856271	0.669758	1.09472	0.216	0	0.252
10yrs	G	J07BL	Yellow fever vaccines	1313	5	26847	130	0.183173	0.385226	0.475495	1.20102	0.564458	2.55547	0.634	0	0.634
10yrs	G	J07CA	Bacterial and viral vaccines, combined	1145	173	22409	4568	-0.247498	0.0858446	-2.88309	0.780752	0.65984	0.92382	0.00394	1	0.0092
10yrs	H	J07AL	Pneumococcal vaccines	159	11	24839	2138	0.0726557	0.322167	0.225521	1.07536	0.57189	2.02207	0.822	0	0.822
10yrs	H	J07BB	Influenza vaccines	137	33	19029	7948	-0.699054	0.219304	-3.1876	0.497055	0.323388	0.763985	0.00144	1	0.00431
10yrs	H	J07CA	Bacterial and viral vaccines, combined	152	18	22409	4568	-0.432617	0.296948	-1.45687	0.648809	0.362529	1.16116	0.145	0	0.218
