# Supplementary material for: Exploring Drugs and Vaccines Associated with Altered Risks and Severity of COVID-19: A UK Biobank Cohort Study of All ATC Level-4 Drug Categories Reveals Repositioning Opportunities
Source: Pharmaceutics. 2021 Sep 18;13(9):1514. doi: 10.3390/pharmaceutics13091514 (PMC8471264; doi:10.3390/pharmaceutics13091514)
Supplement: Supplementary file 1 [file pharmaceutics-13-01514-s001.zip › Table S5 top 10 drugs harmful association for each time-window and model updated11Jan.xlsx]

## Sheet: a)Window-Model-top10-harm
Window	Model	drug	Full name	case_notx	case_tx	ctrl_notx	ctrl_tx	estimate	std.error	statistic	OR	conf.low	conf.high	p	sig	p.adj
6m	A	J01CA	Penicillins with extended spectrum [DG:DG01780]	1161	157	2445	95	1.19073	0.150941	7.8887	3.28948	2.44684	4.42231	3.95e-15	-1	5.89e-13
6m	A	J01AA	Tetracyclines [DG:DG01197]	1198	120	2475	65	1.12842	0.175473	6.43073	3.09077	2.19107	4.35991	1.43e-10	-1	1.07e-08
6m	A	H02AB	Glucocorticoids	1196	122	2474	66	1.17374	0.185581	6.32469	3.23407	2.24767	4.65334	2.83e-10	-1	1.41e-08
6m	A	N02AA	Natural opium alkaloids	1230	88	2513	27	1.53566	0.253746	6.05193	4.64437	2.82403	7.63809	1.57e-09	-1	5.85e-08
6m	A	A06AD	Osmotically acting laxatives	1165	153	2440	100	0.947507	0.159612	5.93632	2.57927	1.88622	3.52697	3.17e-09	-1	8.37e-08
6m	A	A06AB	Contact laxatives	1210	108	2501	39	1.24306	0.231505	5.36946	3.46619	2.20157	5.45723	8.37e-08	-1	1.78e-06
6m	A	A06AA	Softeners, emollients	1251	67	2518	22	1.53156	0.31421	4.87432	4.62538	2.49809	8.56422	1.14e-06	-1	2.12e-05
6m	A	J01FA	Macrolides [DG:DG01551]	1265	53	2510	30	1.18486	0.2612	4.53622	3.27024	1.95963	5.45738	5.9e-06	-1	9.77e-05
6m	A	J01CR	Combinations of penicillins, incl. beta-lactamase inhibitors	1273	45	2521	19	1.32453	0.315527	4.19785	3.76044	2.02571	6.98072	2.76e-05	-1	0.000411
6m	A	N03AX	Other antiepileptics	1186	132	2457	83	0.735242	0.176947	4.15515	2.08599	1.4745	2.95105	3.32e-05	-1	0.00045
6m	B	N05CD	Benzodiazepine derivatives	145	25	3663	25	2.6501	0.376001	7.04813	14.1555	6.77284	29.5855	2.14e-12	-1	1.78e-10
6m	B	N02AA	Natural opium alkaloids	136	34	3607	81	1.9766	0.285723	6.9179	7.21818	4.12233	12.639	5.35e-12	-1	2.22e-10
6m	B	A03BB	Belladonna alkaloids, semisynthetic, quaternary ammonium compounds	152	18	3653	35	2.19173	0.386928	5.66445	8.9507	4.19179	19.1124	1.58e-08	-1	4.37e-07
6m	B	A06AB	Contact laxatives	136	34	3575	113	1.48043	0.280773	5.27269	4.39483	2.53438	7.62101	1.42e-07	-1	2.95e-06
6m	B	J01CA	Penicillins with extended spectrum [DG:DG01780]	136	34	3470	218	1.16345	0.255697	4.5501	3.20095	1.93892	5.28443	5.53e-06	-1	9.18e-05
6m	B	N02BE	Anilides	96	74	3154	534	0.89681	0.207925	4.31315	2.45177	1.63094	3.68571	1.65e-05	-1	0.000228
6m	B	H02AB	Glucocorticoids	144	26	3526	162	1.2396	0.30759	4.03004	3.45424	1.88994	6.31329	5.69e-05	-1	0.000675
6m	B	M05BA	Bisphosphonates [DG:DG01600]	153	17	3600	88	1.38782	0.347777	3.99054	4.0061	2.02581	7.92217	6.72e-05	-1	0.000697
6m	B	A06AD	Osmotically acting laxatives	131	39	3474	214	0.967676	0.24582	3.93653	2.63182	1.62535	4.26152	8.41e-05	-1	0.000776
6m	B	J01AA	Tetracyclines [DG:DG01197]	148	22	3525	163	1.0634	0.301983	3.52139	2.8962	1.60214	5.2355	0.000434	-1	0.0036
6m	C	J01CA	Penicillins with extended spectrum [DG:DG01780]	1161	157	388974	4168	2.45998	0.0963779	25.5243	11.7045	9.68983	14.1381	1.39e-143	-1	2.46e-141
6m	C	J01AA	Tetracyclines [DG:DG01197]	1198	120	389325	3817	2.12686	0.113012	18.8198	8.38853	6.72185	10.4684	5.64e-79	-1	4.99e-77
6m	C	A06AD	Osmotically acting laxatives	1165	153	383979	9163	1.51258	0.100727	15.0166	4.53844	3.72535	5.52899	5.91e-51	-1	3.49e-49
6m	C	A06AB	Contact laxatives	1210	108	390079	3063	1.87316	0.129207	14.4974	6.50886	5.0527	8.38469	1.3e-47	-1	5.75e-46
6m	C	H02AB	Glucocorticoids	1196	122	386491	6651	1.57099	0.1145	13.7204	4.81142	3.84424	6.02194	7.84e-43	-1	2.78e-41
6m	C	N02AA	Natural opium alkaloids	1230	88	389760	3382	1.74654	0.135163	12.9217	5.73472	4.40008	7.47418	3.46e-38	-1	1.02e-36
6m	C	N05CD	Benzodiazepine derivatives	1285	33	392415	727	2.46549	0.202529	12.1735	11.7693	7.91327	17.5042	4.36e-34	-1	1.1e-32
6m	C	J01XE	Nitrofuran derivatives	1234	84	387245	5897	1.46566	0.126445	11.5914	4.33042	3.37987	5.5483	4.61e-31	-1	1.02e-29
6m	C	N02BE	Anilides	1004	314	364531	28611	0.945662	0.0821071	11.5174	2.57452	2.19182	3.02403	1.09e-30	-1	2.14e-29
6m	C	J01CF	Beta-lactamase resistant penicillins [DG:DG01779]	1239	79	389139	4003	1.55565	0.136841	11.3683	4.73817	3.62353	6.1957	6.08e-30	-1	1.08e-28
6m	D	N05CD	Benzodiazepine derivatives	145	25	392415	727	4.1464	0.260948	15.8897	63.2062	37.9	105.41	7.77e-57	-1	6.53e-55
6m	D	J01CA	Penicillins with extended spectrum [DG:DG01780]	136	34	388974	4168	2.99622	0.223651	13.3969	20.0097	12.9083	31.0179	6.44e-41	-1	2.7e-39
6m	D	N02AA	Natural opium alkaloids	136	34	389760	3382	3.1213	0.239541	13.0303	22.6759	14.1797	36.2629	8.38e-39	-1	2.35e-37
6m	D	A03BB	Belladonna alkaloids, semisynthetic, quaternary ammonium compounds	152	18	391773	1369	3.46886	0.285931	12.1318	32.1	18.3282	56.22	7.27e-34	-1	1.53e-32
6m	D	A06AB	Contact laxatives	136	34	390079	3063	2.72223	0.244571	11.1306	15.2142	9.42037	24.5713	8.99e-29	-1	1.51e-27
6m	D	J01AA	Tetracyclines [DG:DG01197]	148	22	389325	3817	2.58855	0.271123	9.54751	13.3104	7.82369	22.6451	1.34e-21	-1	1.88e-20
6m	D	A06AD	Osmotically acting laxatives	131	39	383979	9163	2.00432	0.216555	9.25547	7.42103	4.85435	11.3448	2.14e-20	-1	2.57e-19
6m	D	N02BE	Anilides	96	74	364531	28611	1.68825	0.197281	8.55759	5.41001	3.67512	7.96388	1.16e-17	-1	1.22e-16
6m	D	N05BA	Benzodiazepine derivatives [DG:DG01914]	155	15	390891	2251	2.61309	0.317619	8.22714	13.6412	7.31971	25.4221	1.92e-16	-1	1.79e-15
6m	D	N05AD	Butyrophenone derivatives [DG:DG01940]	164	6	393036	106	4.11996	0.535426	7.69473	61.5566	21.5535	175.805	1.42e-14	-1	1.19e-13
6m	E	J01CA	Penicillins with extended spectrum [DG:DG01780]	3606	252	388974	4168	1.85799	0.0726458	25.576	6.41082	5.56003	7.39179	3.7e-144	-1	7.7e-142
6m	E	J01AA	Tetracyclines [DG:DG01197]	3673	185	389325	3817	1.5484	0.0844652	18.3318	4.70392	3.98623	5.55082	4.96e-75	-1	5.16e-73
6m	E	A06AD	Osmotically acting laxatives	3605	253	383979	9163	1.05354	0.0755972	13.9362	2.86777	2.47284	3.32578	3.91e-44	-1	2.71e-42
6m	E	N02BE	Anilides	3250	608	364531	28611	0.739262	0.0535129	13.8146	2.09439	1.88585	2.32599	2.13e-43	-1	1.11e-41
6m	E	A06AB	Contact laxatives	3711	147	390079	3063	1.38455	0.104865	13.2032	3.99303	3.25118	4.90414	8.57e-40	-1	3.57e-38
6m	E	N05CD	Benzodiazepine derivatives	3808	50	392415	727	2.05805	0.164518	12.5095	7.83066	5.67231	10.8103	6.73e-36	-1	2.33e-34
6m	E	H02AB	Glucocorticoids	3670	188	386491	6651	1.03882	0.0867499	11.9749	2.82589	2.38404	3.34963	4.87e-33	-1	1.45e-31
6m	E	N06DX	Other anti-dementia drugs	3794	64	392296	846	1.98234	0.170065	11.6564	7.25969	5.20186	10.1316	2.16e-31	-1	5.62e-30
6m	E	J01XE	Nitrofuran derivatives	3699	159	387245	5897	1.02487	0.0884132	11.5918	2.78673	2.34335	3.314	4.59e-31	-1	1.06e-29
6m	E	N05BA	Benzodiazepine derivatives [DG:DG01914]	3766	92	390891	2251	1.33426	0.116823	11.4212	3.79719	3.0201	4.77422	3.31e-30	-1	6.88e-29
6m	F	N06DX	Other anti-dementia drugs	3794	64	26791	186	1.13874	0.182636	6.235	3.12282	2.18313	4.46697	4.58e-10	-1	4.76e-08
6m	F	N05CD	Benzodiazepine derivatives	3808	50	26799	178	0.937352	0.185749	5.04633	2.55321	1.77407	3.67454	4.53e-07	-1	3.14e-05
6m	F	J01CA	Penicillins with extended spectrum [DG:DG01780]	3606	252	25554	1423	0.351807	0.077925	4.51469	1.42163	1.22027	1.65623	6.36e-06	-1	0.000265
6m	F	N06DA	Anticholinesterases	3795	63	26683	294	0.677395	0.17206	3.93696	1.96874	1.40516	2.75837	8.27e-05	-1	0.00215
6m	F	N05AX	Other antipsychotics	3826	32	26857	120	0.768115	0.240456	3.1944	2.1557	1.34556	3.45361	0.0014	-1	0.0233
6m	F	D06BA	Sulfonamides	3853	5	26967	10	2.05464	0.666057	3.08479	7.80405	2.11519	28.7933	0.00204	-1	0.0303
6m	F	A06AB	Contact laxatives	3711	147	26155	822	0.332573	0.111545	2.98153	1.39455	1.12069	1.73534	0.00287	-1	0.0349
6m	F	J01AA	Tetracyclines [DG:DG01197]	3673	185	25851	1126	0.268744	0.09114	2.94869	1.30832	1.09429	1.56421	0.00319	-1	0.035
6m	F	R06AE	Piperazine derivatives	3723	135	26169	808	0.292746	0.1075	2.72322	1.3401	1.0855	1.65442	0.00647	-1	0.0641
6m	F	A01AB	Antiinfectives and antiseptics for local oral treatment	3791	67	26575	402	0.36888	0.138842	2.65683	1.44611	1.10158	1.89841	0.00789	-1	0.0659
6m	G	J01CA	Penicillins with extended spectrum [DG:DG01780]	1161	157	25554	1423	0.975826	0.0996655	9.79102	2.65336	2.18251	3.22578	1.34e-22	-1	2.37e-20
6m	G	J01AA	Tetracyclines [DG:DG01197]	1198	120	25851	1126	0.882467	0.117155	7.5325	2.41686	1.92099	3.04072	5.13e-14	-1	4.54e-12
6m	G	A06AB	Contact laxatives	1210	108	26155	822	0.893655	0.132177	6.76107	2.44405	1.88623	3.16682	1.4e-11	-1	8.26e-10
6m	G	N05CD	Benzodiazepine derivatives	1285	33	26799	178	1.42278	0.220419	6.45487	4.14862	2.69324	6.39047	1.1e-10	-1	4.87e-09
6m	G	A06AA	Softeners, emollients	1251	67	26392	585	0.829641	0.160421	5.17163	2.2925	1.67398	3.13953	2.34e-07	-1	6.9e-06
6m	G	N06DX	Other anti-dementia drugs	1287	31	26791	186	1.2275	0.244718	5.01599	3.4127	2.11244	5.51329	5.31e-07	-1	1.34e-05
6m	G	R06AE	Piperazine derivatives	1236	82	26169	808	0.705623	0.141976	4.97	2.02511	1.53318	2.67488	6.73e-07	-1	1.49e-05
6m	G	A06AD	Osmotically acting laxatives	1165	153	24878	2099	0.495302	0.102638	4.82572	1.64099	1.34195	2.00667	1.4e-06	-1	2.48e-05
6m	G	N02AA	Natural opium alkaloids	1230	88	26022	955	0.651319	0.135801	4.79614	1.91807	1.46983	2.50301	1.63e-06	-1	2.62e-05
6m	G	H02AB	Glucocorticoids	1196	122	25408	1569	0.561821	0.117992	4.7615	1.75386	1.39173	2.21022	1.93e-06	-1	2.85e-05
6m	H	N05CD	Benzodiazepine derivatives	145	25	26799	178	3.12685	0.283817	11.0171	22.802	13.0731	39.7713	3.63e-28	-1	3.05e-26
6m	H	N02AA	Natural opium alkaloids	136	34	26022	955	1.94799	0.235765	8.26244	7.0146	4.41886	11.1351	1.49e-16	-1	6.26e-15
6m	H	A03BB	Belladonna alkaloids, semisynthetic, quaternary ammonium compounds	152	18	26607	370	2.2843	0.298128	7.66216	9.81885	5.47372	17.6132	1.89e-14	-1	5.29e-13
6m	H	A06AB	Contact laxatives	136	34	26155	822	1.73389	0.242845	7.13989	5.66264	3.51803	9.11462	9.58e-13	-1	2.01e-11
6m	H	J01CA	Penicillins with extended spectrum [DG:DG01780]	136	34	25554	1423	1.53667	0.22699	6.7698	4.6491	2.97952	7.25423	1.32e-11	-1	2.22e-10
6m	H	J01AA	Tetracyclines [DG:DG01197]	148	22	25851	1126	1.41188	0.273288	5.16627	4.10366	2.40181	7.01141	2.41e-07	-1	3.37e-06
6m	H	N05BA	Benzodiazepine derivatives [DG:DG01914]	155	15	26444	533	1.64583	0.323441	5.08852	5.18534	2.75075	9.77468	3.63e-07	-1	4.36e-06
6m	H	N02BE	Anilides	96	74	22021	4956	0.939422	0.193994	4.84253	2.5585	1.74924	3.74215	1.29e-06	-1	1.35e-05
6m	H	N05AX	Other antipsychotics	162	8	26857	120	2.10447	0.444178	4.73789	8.20274	3.43445	19.5912	2.17e-06	-1	1.87e-05
6m	H	A06AD	Osmotically acting laxatives	131	39	24878	2099	1.02857	0.217332	4.73272	2.79707	1.82684	4.28257	2.23e-06	-1	1.87e-05
1yrs	A	A06AD	Osmotically acting laxatives	1101	217	2393	147	0.918504	0.136253	6.74114	2.50554	1.91816	3.27278	1.81e-11	-1	1.63e-09
1yrs	A	N02AA	Natural opium alkaloids	1220	98	2497	43	1.23685	0.220144	5.61835	3.44474	2.23723	5.30399	2.07e-08	-1	1.24e-06
1yrs	A	H02AB	Glucocorticoids	1140	178	2396	144	0.722097	0.140824	5.12766	2.05875	1.56205	2.71338	3.08e-07	-1	1.39e-05
1yrs	A	A06AA	Softeners, emollients	1243	75	2510	30	1.36319	0.276291	4.93387	3.90863	2.27389	6.71859	8.4e-07	-1	2.93e-05
1yrs	A	A06AB	Contact laxatives	1189	129	2476	64	0.959996	0.195754	4.90409	2.61169	1.77927	3.83354	9.78e-07	-1	2.93e-05
1yrs	A	A03FA	Propulsives [DG:DG01763]	1289	29	2532	8	2.02629	0.464975	4.35785	7.5859	3.04856	18.8764	1.35e-05	-1	0.000347
1yrs	A	J01CR	Combinations of penicillins, incl. beta-lactamase inhibitors	1245	73	2500	40	1.00644	0.235785	4.26846	2.73584	1.72317	4.34365	2.02e-05	-1	0.000454
1yrs	A	J01CA	Penicillins with extended spectrum [DG:DG01780]	1064	254	2268	272	0.441149	0.108763	4.05607	1.55449	1.25597	1.92396	5.09e-05	-1	0.00095
1yrs	A	J01AA	Tetracyclines [DG:DG01197]	1159	159	2391	149	0.55485	0.13708	4.04764	1.74168	1.33122	2.2787	5.28e-05	-1	0.00095
1yrs	A	N03AX	Other antiepileptics	1163	155	2430	110	0.637738	0.158865	4.01434	1.8922	1.38579	2.58366	6.08e-05	-1	0.000995
1yrs	B	N05CD	Benzodiazepine derivatives	145	25	3656	32	2.47269	0.358087	6.90528	11.8543	5.87456	23.9208	5.84e-12	-1	5.49e-10
1yrs	B	N02AA	Natural opium alkaloids	134	36	3583	105	1.8316	0.27388	6.68762	6.2439	3.64968	10.6821	2.6e-11	-1	1.22e-09
1yrs	B	A03BB	Belladonna alkaloids, semisynthetic, quaternary ammonium compounds	152	18	3629	59	1.7103	0.356846	4.79284	5.53065	2.74747	11.1332	1.71e-06	-1	5.36e-05
1yrs	B	A06AB	Contact laxatives	134	36	3531	157	1.13353	0.265477	4.26978	3.1066	1.84603	5.22794	2e-05	-1	0.00047
1yrs	B	M05BA	Bisphosphonates [DG:DG01600]	151	19	3568	120	1.1978	0.322745	3.7113	3.31283	1.75951	6.23745	0.000209	-1	0.00393
1yrs	B	N05BA	Benzodiazepine derivatives [DG:DG01914]	150	20	3570	118	1.18029	0.323663	3.64667	3.25532	1.72586	6.14021	0.000269	-1	0.00414
1yrs	B	A06AD	Osmotically acting laxatives	121	49	3373	315	0.8186	0.226671	3.6114	2.26732	1.45382	3.53604	0.000308	-1	0.00414
1yrs	B	N02BE	Anilides	89	81	2952	736	0.7048	0.203229	3.46801	2.02344	1.35846	3.01394	0.00053	-1	0.00623
1yrs	B	A11DA	Vitamin B1, plain	160	10	3657	31	1.53977	0.506813	3.03815	4.66353	1.72655	12.5965	0.0024	-1	0.0231
1yrs	B	N03AX	Other antiepileptics	137	33	3456	232	0.852802	0.281416	3.0304	2.34621	1.35129	4.07366	0.00246	-1	0.0231
1yrs	C	A06AD	Osmotically acting laxatives	1101	217	375078	18064	1.18437	0.0877414	13.4984	3.26862	2.75219	3.88195	1.63e-41	-1	3.26e-39
1yrs	C	A06AB	Contact laxatives	1189	129	387741	5401	1.53549	0.117714	13.0442	4.64359	3.68685	5.84861	6.98e-39	-1	6.98e-37
1yrs	C	J01CA	Penicillins with extended spectrum [DG:DG01780]	1064	254	366276	26866	0.974794	0.0799004	12.2001	2.65062	2.2664	3.09998	3.15e-34	-1	2.1e-32
1yrs	C	N05CD	Benzodiazepine derivatives	1281	37	391787	1355	1.99186	0.186355	10.6885	7.32917	5.08661	10.5604	1.16e-26	-1	5.8e-25
1yrs	C	N02AA	Natural opium alkaloids	1220	98	387416	5726	1.3139	0.127872	10.2751	3.72066	2.89584	4.78041	9.19e-25	-1	3.68e-23
1yrs	C	J01CF	Beta-lactamase resistant penicillins [DG:DG01779]	1180	138	380509	12633	0.996693	0.104448	9.5425	2.70931	2.20776	3.32479	1.4e-21	-1	4.67e-20
1yrs	C	A06AA	Softeners, emollients	1243	75	389191	3951	1.38403	0.145393	9.51929	3.99097	3.00137	5.30686	1.75e-21	-1	5e-20
1yrs	C	J01AA	Tetracyclines [DG:DG01197]	1159	159	376970	16172	0.915709	0.100013	9.15587	2.49855	2.05379	3.03962	5.42e-20	-1	1.2e-18
1yrs	C	N05BA	Benzodiazepine derivatives [DG:DG01914]	1248	70	387526	5616	1.20284	0.136101	8.83788	3.32958	2.54999	4.34749	9.79e-19	-1	1.87e-17
1yrs	C	J01XE	Nitrofuran derivatives	1176	142	374700	18442	0.881303	0.0997852	8.832	2.41404	1.98521	2.9355	1.03e-18	-1	1.87e-17
1yrs	D	N05CD	Benzodiazepine derivatives	145	25	391787	1355	3.39524	0.25767	13.1767	29.8218	17.9972	49.4155	1.22e-39	-1	1.16e-37
1yrs	D	N02AA	Natural opium alkaloids	134	36	387416	5726	2.55738	0.231916	11.0272	12.902	8.18935	20.3266	2.85e-28	-1	1.35e-26
1yrs	D	A06AB	Contact laxatives	134	36	387741	5401	2.26436	0.234731	9.64665	9.625	6.07571	15.2477	5.11e-22	-1	1.62e-20
1yrs	D	A03BB	Belladonna alkaloids, semisynthetic, quaternary ammonium compounds	152	18	390072	3070	2.57824	0.281024	9.17446	13.174	7.59464	22.852	4.56e-20	-1	1.08e-18
1yrs	D	A06AD	Osmotically acting laxatives	121	49	375078	18064	1.60003	0.203273	7.87132	4.95319	3.3255	7.37755	3.52e-15	-1	6.69e-14
1yrs	D	N05BA	Benzodiazepine derivatives [DG:DG01914]	150	20	387526	5616	2.03411	0.279488	7.278	7.64546	4.42082	13.2222	3.39e-13	-1	5.37e-12
1yrs	D	J01XE	Nitrofuran derivatives	139	31	374700	18442	1.51781	0.231057	6.56899	4.56223	2.90068	7.17553	5.07e-11	-1	6.86e-10
1yrs	D	N02BE	Anilides	89	81	343710	49432	1.27649	0.194896	6.54958	3.58402	2.4461	5.2513	5.78e-11	-1	6.86e-10
1yrs	D	J01CA	Penicillins with extended spectrum [DG:DG01780]	128	42	366276	26866	1.28365	0.20964	6.12313	3.60979	2.39352	5.44413	9.18e-10	-1	9.69e-09
1yrs	D	J01CF	Beta-lactamase resistant penicillins [DG:DG01779]	141	29	380509	12633	1.4752	0.243176	6.06641	4.37192	2.71444	7.04149	1.31e-09	-1	1.24e-08
1yrs	E	J01CA	Penicillins with extended spectrum [DG:DG01780]	3332	526	366276	26866	0.672873	0.0509662	13.2023	1.95986	1.77355	2.16575	8.67e-40	-1	2.05e-37
1yrs	E	A06AB	Contact laxatives	3665	193	387741	5401	1.10902	0.0915779	12.1101	3.03138	2.53331	3.62737	9.47e-34	-1	1.12e-31
1yrs	E	N02BE	Anilides	3041	817	343710	49432	0.525324	0.0466226	11.2676	1.69101	1.54333	1.85281	1.92e-29	-1	1.52e-27
1yrs	E	A06AD	Osmotically acting laxatives	3494	364	375078	18064	0.692792	0.0643489	10.7662	1.99929	1.76239	2.26803	5.02e-27	-1	2.97e-25
1yrs	E	N06DX	Other anti-dementia drugs	3792	66	392134	1008	1.81132	0.169377	10.694	6.11849	4.39006	8.52744	1.1e-26	-1	5.21e-25
1yrs	E	N05CD	Benzodiazepine derivatives	3801	57	391787	1355	1.54929	0.150211	10.3141	4.70813	3.50743	6.31988	6.13e-25	-1	2.42e-23
1yrs	E	J01XE	Nitrofuran derivatives	3541	317	374700	18442	0.622647	0.062459	9.96889	1.86386	1.6491	2.10658	2.1e-23	-1	7.11e-22
1yrs	E	J01CF	Beta-lactamase resistant penicillins [DG:DG01779]	3589	269	380509	12633	0.672526	0.0690514	9.73951	1.95918	1.71119	2.24311	2.06e-22	-1	6.1e-21
1yrs	E	J01AA	Tetracyclines [DG:DG01197]	3550	308	376970	16172	0.619056	0.0652512	9.48727	1.85717	1.63422	2.11055	2.38e-21	-1	6.27e-20
1yrs	E	N05BA	Benzodiazepine derivatives [DG:DG01914]	3720	138	387526	5616	0.809985	0.0939013	8.62592	2.24787	1.87	2.7021	6.38e-18	-1	1.51e-16
1yrs	F	N06DX	Other anti-dementia drugs	3792	66	26775	202	1.08185	0.180291	6.00059	2.95014	2.07192	4.20062	1.99e-09	-1	1.57e-07
1yrs	F	N05CD	Benzodiazepine derivatives	3801	57	26745	232	0.835438	0.168887	4.94674	2.30582	1.65601	3.21061	7.59e-07	-1	3.6e-05
1yrs	F	N06DA	Anticholinesterases	3789	69	26651	326	0.702633	0.16404	4.28332	2.01906	1.46391	2.78475	1.85e-05	-1	0.000626
1yrs	F	D01BA	Antifungals for systemic use	3827	31	26860	117	0.678732	0.201337	3.37113	1.97138	1.32857	2.92519	0.000749	-1	0.0129
1yrs	F	N05AX	Other antipsychotics	3819	39	26835	142	0.716769	0.22121	3.24022	2.04781	1.32735	3.1593	0.0012	-1	0.0189
1yrs	F	A06AB	Contact laxatives	3665	193	25854	1123	0.300211	0.0976098	3.07563	1.35014	1.11504	1.63482	0.0021	-1	0.0262
1yrs	F	D06BA	Sulfonamides	3851	7	26961	16	1.6175	0.541591	2.98658	5.04049	1.74362	14.5711	0.00282	-1	0.0319
1yrs	F	J01CA	Penicillins with extended spectrum [DG:DG01780]	3332	526	23451	3526	0.158789	0.055197	2.87676	1.17209	1.0519	1.30601	0.00402	-1	0.0397
1yrs	F	A09AB	Acid preparations	3847	11	26952	25	1.04104	0.415029	2.50835	2.83215	1.25554	6.38856	0.0121	-1	0.0821
1yrs	F	M02AA	Antiinflammatory preparations, non-steroids for topical use	3539	319	24608	2369	0.169126	0.070578	2.3963	1.18427	1.03127	1.35997	0.0166	-1	0.104
1yrs	G	N05CD	Benzodiazepine derivatives	1281	37	26745	232	1.33806	0.202337	6.61303	3.81163	2.56374	5.66693	3.83e-11	-1	7.36e-09
1yrs	G	A06AB	Contact laxatives	1189	129	25854	1123	0.785105	0.120496	6.51563	2.19264	1.7314	2.77675	7.36e-11	-1	7.36e-09
1yrs	G	J01CA	Penicillins with extended spectrum [DG:DG01780]	1064	254	23451	3526	0.454077	0.0823269	5.51555	1.57472	1.34006	1.85047	3.51e-08	-1	1.4e-06
1yrs	G	A06AD	Osmotically acting laxatives	1101	217	23975	3002	0.474176	0.08933	5.30814	1.60669	1.34862	1.91414	1.12e-07	-1	3.73e-06
1yrs	G	N06DX	Other anti-dementia drugs	1285	33	26775	202	1.19216	0.239716	4.97322	3.2942	2.05918	5.26994	6.62e-07	-1	1.89e-05
1yrs	G	A06AA	Softeners, emollients	1243	75	26198	779	0.655905	0.15002	4.37211	1.92689	1.436	2.58559	1.24e-05	-1	0.000276
1yrs	G	J01AA	Tetracyclines [DG:DG01197]	1159	159	24705	2272	0.424752	0.10288	4.12863	1.52921	1.24995	1.87086	3.66e-05	-1	0.000724
1yrs	G	R06AE	Piperazine derivatives	1218	100	25795	1182	0.522702	0.1272	4.10929	1.68658	1.3144	2.16413	3.98e-05	-1	0.000724
1yrs	G	D06BA	Sulfonamides	1313	5	26961	16	2.36519	0.585336	4.04074	10.6461	3.38009	33.5313	5.34e-05	-1	0.00089
1yrs	G	N05BA	Benzodiazepine derivatives [DG:DG01914]	1248	70	26064	913	0.515732	0.140988	3.658	1.67486	1.27047	2.20797	0.000255	-1	0.00392
1yrs	H	N05CD	Benzodiazepine derivatives	145	25	26745	232	2.82946	0.278514	10.1591	16.9363	9.81152	29.2348	3.33e-24	-1	3.16e-22
1yrs	H	N02AA	Natural opium alkaloids	134	36	25729	1248	1.73952	0.229981	7.56377	5.69463	3.62825	8.93788	4.04e-14	-1	1.92e-12
1yrs	H	A06AB	Contact laxatives	134	36	25854	1123	1.51531	0.233315	6.49472	4.55085	2.88062	7.18951	8.46e-11	-1	2.68e-09
1yrs	H	A03BB	Belladonna alkaloids, semisynthetic, quaternary ammonium compounds	152	18	26410	567	1.81979	0.292264	6.22655	6.17059	3.47969	10.9424	4.84e-10	-1	1.15e-08
1yrs	H	N05BA	Benzodiazepine derivatives [DG:DG01914]	150	20	26064	913	1.4506	0.283663	5.11379	4.26566	2.44636	7.43792	3.18e-07	-1	6.04e-06
1yrs	H	A06AD	Osmotically acting laxatives	121	49	23975	3002	0.920464	0.203716	4.51837	2.51045	1.684	3.74251	6.26e-06	-1	9.91e-05
1yrs	H	N05AX	Other antipsychotics	162	8	26835	142	1.94098	0.443653	4.37499	6.96557	2.91945	16.6193	1.22e-05	-1	0.000166
1yrs	H	A11DA	Vitamin B1, plain	160	10	26666	311	1.71351	0.406006	4.2204	5.54838	2.50356	12.2963	2.45e-05	-1	0.000259
1yrs	H	N02BE	Anilides	89	81	20616	6361	0.809295	0.191786	4.21978	2.24632	1.54247	3.27136	2.45e-05	-1	0.000259
1yrs	H	N06DX	Other anti-dementia drugs	157	13	26775	202	1.59834	0.385208	4.14928	4.94481	2.32405	10.5209	3.35e-05	-1	0.000318
2yrs	A	A06AD	Osmotically acting laxatives	1045	273	2342	198	0.797822	0.121609	6.56053	2.2207	1.74962	2.81862	6.08e-11	-1	6.26e-09
2yrs	A	A06AA	Softeners, emollients	1226	92	2502	38	1.3944	0.251351	5.54761	4.03254	2.46355	6.6008	3.09e-08	-1	2.12e-06
2yrs	A	N02AA	Natural opium alkaloids	1197	121	2469	71	0.982189	0.183326	5.35762	2.67029	1.86407	3.82521	8.93e-08	-1	4.6e-06
2yrs	A	A06AB	Contact laxatives	1157	161	2457	83	0.931268	0.175398	5.30947	2.53772	1.79928	3.57924	1.16e-07	-1	4.78e-06
2yrs	A	H02AB	Glucocorticoids	1077	241	2301	239	0.578683	0.118997	4.86302	1.78369	1.41253	2.25238	1.2e-06	-1	4.12e-05
2yrs	A	A11DA	Vitamin B1, plain	1279	39	2530	10	1.65887	0.437715	3.78984	5.25337	2.22708	12.392	0.000153	-1	0.00451
2yrs	A	N05BA	Benzodiazepine derivatives [DG:DG01914]	1217	101	2433	107	0.58296	0.162409	3.58944	1.79133	1.30283	2.46299	0.000336	-1	0.00864
2yrs	A	A03FA	Propulsives [DG:DG01763]	1284	34	2522	18	1.18193	0.337964	3.4972	3.26065	1.68088	6.32514	0.000476	-1	0.0105
2yrs	A	N03AX	Other antiepileptics	1139	179	2386	154	0.490411	0.14102	3.47759	1.63299	1.23853	2.15307	0.000512	-1	0.0105
2yrs	A	C03CA	Sulfonamides, plain	1152	166	2433	107	0.544531	0.170745	3.18916	1.7238	1.2334	2.40919	0.00144	-1	0.0228
2yrs	B	N05CD	Benzodiazepine derivatives	145	25	3651	37	2.32297	0.349408	6.6483	10.2059	5.14449	20.2471	3.38e-11	-1	3.52e-09
2yrs	B	N02AA	Natural opium alkaloids	130	40	3536	152	1.62798	0.255183	6.37967	5.09359	3.08847	8.4005	1.99e-10	-1	1.03e-08
2yrs	B	A06AB	Contact laxatives	126	44	3488	200	1.17996	0.247804	4.76166	3.25424	2.00194	5.28991	1.99e-06	-1	6.9e-05
2yrs	B	A03BB	Belladonna alkaloids, semisynthetic, quaternary ammonium compounds	152	18	3594	94	1.28655	0.336242	3.82624	3.62026	1.87257	6.99907	0.000132	-1	0.00344
2yrs	B	N05BA	Benzodiazepine derivatives [DG:DG01914]	145	25	3505	183	1.00479	0.285341	3.52136	2.73133	1.56104	4.77896	0.000434	-1	0.00903
2yrs	B	A06AD	Osmotically acting laxatives	112	58	3275	413	0.735754	0.216592	3.39696	2.08705	1.36494	3.19121	0.000688	-1	0.0119
2yrs	B	A11CC	Vitamin D and analogues	147	23	3491	197	1.00237	0.308048	3.25394	2.72474	1.48947	4.98446	0.00115	-1	0.0171
2yrs	B	N02BE	Anilides	78	92	2736	952	0.637527	0.20119	3.16879	1.8918	1.27517	2.8066	0.00154	-1	0.0201
2yrs	B	N06DX	Other anti-dementia drugs	152	18	3628	60	1.12669	0.37235	3.02588	3.08542	1.48686	6.40264	0.0025	-1	0.0288
2yrs	B	J01CF	Beta-lactamase resistant penicillins [DG:DG01779]	125	45	3283	405	0.674755	0.232014	2.90825	1.96355	1.24592	3.09453	0.00365	-1	0.0371
2yrs	C	A06AB	Contact laxatives	1157	161	385083	8059	1.4119	0.106098	13.3076	4.10376	3.33327	5.05234	2.13e-40	-1	4.69e-38
2yrs	C	A06AD	Osmotically acting laxatives	1045	273	365925	27217	0.983794	0.0810106	12.144	2.67458	2.28192	3.13482	6.26e-34	-1	6.89e-32
2yrs	C	N02AA	Natural opium alkaloids	1197	121	384564	8578	1.15884	0.115278	10.0526	3.18623	2.54186	3.99394	9.01e-24	-1	6.61e-22
2yrs	C	N06DX	Other anti-dementia drugs	1278	40	392070	1072	2.07689	0.215879	9.6206	7.97958	5.22664	12.1825	6.58e-22	-1	3.26e-20
2yrs	C	A06AA	Softeners, emollients	1226	92	387392	5750	1.25761	0.130884	9.60859	3.51699	2.72122	4.54549	7.4e-22	-1	3.26e-20
2yrs	C	N05CD	Benzodiazepine derivatives	1280	38	391336	1806	1.72554	0.184676	9.34356	5.61553	3.91015	8.06469	9.36e-21	-1	2.94e-19
2yrs	C	N05BA	Benzodiazepine derivatives [DG:DG01914]	1217	101	381996	11146	0.925385	0.114299	8.09617	2.52284	2.0165	3.15632	5.69e-16	-1	1.56e-14
2yrs	C	J01CA	Penicillins with extended spectrum [DG:DG01780]	956	362	336972	56170	0.56972	0.0705982	8.0699	1.76777	1.53933	2.03011	7.06e-16	-1	1.73e-14
2yrs	C	N06DA	Anticholinesterases	1276	42	390838	2304	1.42312	0.199903	7.11903	4.15003	2.80474	6.14058	1.09e-12	-1	2.4e-11
2yrs	C	N02BE	Anilides	862	456	325789	67353	0.501277	0.0712545	7.03502	1.65083	1.43565	1.89825	2e-12	-1	3.96e-11
2yrs	D	N05CD	Benzodiazepine derivatives	145	25	391336	1806	3.16187	0.256399	12.3318	23.6146	14.2867	39.0327	6.2e-35	-1	6.45e-33
2yrs	D	N02AA	Natural opium alkaloids	130	40	384564	8578	2.34239	0.219619	10.6657	10.406	6.7662	16.0039	1.49e-26	-1	7.75e-25
2yrs	D	A06AB	Contact laxatives	126	44	385083	8059	2.17907	0.217379	10.0243	8.83805	5.77195	13.5329	1.2e-23	-1	4.16e-22
2yrs	D	A03BB	Belladonna alkaloids, semisynthetic, quaternary ammonium compounds	152	18	387759	5383	2.10406	0.277629	7.57869	8.19942	4.75844	14.1287	3.5e-14	-1	9.1e-13
2yrs	D	N06DX	Other anti-dementia drugs	152	18	392070	1072	2.54518	0.347995	7.31384	12.7455	6.4438	25.2099	2.6e-13	-1	5.41e-12
2yrs	D	A06AD	Osmotically acting laxatives	112	58	365925	27217	1.38585	0.196692	7.04579	3.99822	2.71921	5.87884	1.85e-12	-1	3.21e-11
2yrs	D	N05BA	Benzodiazepine derivatives [DG:DG01914]	145	25	381996	11146	1.71092	0.251453	6.80412	5.53402	3.38067	9.05897	1.02e-11	-1	1.52e-10
2yrs	D	N02BE	Anilides	78	92	325789	67353	1.2188	0.193559	6.2968	3.38313	2.31505	4.94399	3.04e-10	-1	3.95e-09
2yrs	D	N05AX	Other antipsychotics	161	9	392155	987	2.501	0.406034	6.15959	12.1947	5.50243	27.0265	7.3e-10	-1	8.44e-09
2yrs	D	J01CF	Beta-lactamase resistant penicillins [DG:DG01779]	125	45	363520	29622	1.18995	0.20467	5.81398	3.2869	2.20075	4.90911	6.11e-09	-1	6.35e-08
2yrs	E	N06DX	Other anti-dementia drugs	3780	78	392070	1072	2.0019	0.154956	12.9191	7.40308	5.46403	10.0302	3.57e-38	-1	9.28e-36
2yrs	E	A06AB	Contact laxatives	3614	244	385083	8059	0.950941	0.0815868	11.6556	2.58814	2.20567	3.03693	2.18e-31	-1	2.83e-29
2yrs	E	J01CA	Penicillins with extended spectrum [DG:DG01780]	2998	860	336972	56170	0.468102	0.0412145	11.3577	1.59696	1.47303	1.73132	6.86e-30	-1	5.95e-28
2yrs	E	N02BE	Anilides	2814	1044	325789	67353	0.474984	0.0419457	11.3238	1.60799	1.48108	1.74577	1.01e-29	-1	6.56e-28
2yrs	E	N06DA	Anticholinesterases	3776	82	390838	2304	1.30192	0.143249	9.08848	3.67634	2.7764	4.868	1.01e-19	-1	5.25e-18
2yrs	E	N05CD	Benzodiazepine derivatives	3796	62	391336	1806	1.30731	0.144412	9.05269	3.69623	2.78507	4.9055	1.4e-19	-1	6.07e-18
2yrs	E	A06AD	Osmotically acting laxatives	3387	471	365925	27217	0.510405	0.0573722	8.89638	1.66597	1.48878	1.86424	5.79e-19	-1	2.15e-17
2yrs	E	J01XE	Nitrofuran derivatives	3362	496	356872	36270	0.423626	0.0508094	8.33754	1.52749	1.3827	1.68744	7.61e-17	-1	2.47e-15
2yrs	E	M02AA	Antiinflammatory preparations, non-steroids for topical use	3318	540	356016	37126	0.423721	0.0519105	8.16253	1.52764	1.37985	1.69124	3.29e-16	-1	9.5e-15
2yrs	E	J01AA	Tetracyclines [DG:DG01197]	3394	464	363117	30025	0.409663	0.0541834	7.56067	1.50631	1.35454	1.67508	4.02e-14	-1	1.05e-12
2yrs	F	N06DX	Other anti-dementia drugs	3780	78	26760	217	1.25134	0.166329	7.52327	3.49501	2.52269	4.84209	5.49e-14	-1	7.14e-12
2yrs	F	N06DA	Anticholinesterases	3776	82	26621	356	0.81547	0.151153	5.39501	2.26024	1.68069	3.03963	6.9e-08	-1	4.48e-06
2yrs	F	N05CD	Benzodiazepine derivatives	3796	62	26695	282	0.670373	0.160828	4.16826	1.95497	1.42639	2.67943	3.08e-05	-1	0.00114
2yrs	F	D01BA	Antifungals for systemic use	3799	59	26730	247	0.560761	0.144881	3.87048	1.752	1.31889	2.32736	0.000109	-1	0.00229
2yrs	F	N05AX	Other antipsychotics	3812	46	26804	173	0.679361	0.202297	3.35824	1.97262	1.32691	2.93255	0.000785	-1	0.0128
2yrs	F	M02AA	Antiinflammatory preparations, non-steroids for topical use	3318	540	23027	3950	0.182752	0.0560678	3.25949	1.20052	1.07558	1.33997	0.00112	-1	0.0161
2yrs	F	A06AB	Contact laxatives	3614	244	25495	1482	0.250852	0.087224	2.87596	1.28512	1.08317	1.52473	0.00403	-1	0.0437
2yrs	F	J01CA	Penicillins with extended spectrum [DG:DG01780]	2998	860	20958	6019	0.101566	0.0446181	2.27634	1.1069	1.01421	1.20806	0.0228	-1	0.128
2yrs	F	N07BC	Drugs used in opioid dependence	3851	7	26950	27	1.06129	0.48085	2.2071	2.89009	1.12614	7.41698	0.0273	-1	0.142
2yrs	F	D09AA	Medicated dressings with antiinfectives	3814	44	26738	239	0.445377	0.202548	2.19887	1.56108	1.04956	2.32189	0.0279	-1	0.142
2yrs	G	A06AB	Contact laxatives	1157	161	25495	1482	0.74464	0.109097	6.82551	2.10568	1.7003	2.60772	8.94e-12	-1	1.97e-09
2yrs	G	N06DX	Other anti-dementia drugs	1278	40	26760	217	1.36943	0.219339	6.24344	3.93312	2.55874	6.0457	4.34e-10	-1	3.18e-08
2yrs	G	N05CD	Benzodiazepine derivatives	1280	38	26695	282	1.12976	0.198443	5.69311	3.09491	2.09761	4.56636	1.26e-08	-1	5.54e-07
2yrs	G	N06DA	Anticholinesterases	1276	42	26621	356	1.00852	0.202482	4.98081	2.74155	1.84347	4.07714	6.37e-07	-1	2.34e-05
2yrs	G	A06AD	Osmotically acting laxatives	1045	273	22899	4078	0.361074	0.0823777	4.38315	1.43487	1.22093	1.6863	1.17e-05	-1	0.000322
2yrs	G	A06AA	Softeners, emollients	1226	92	25935	1042	0.587707	0.135136	4.349	1.79986	1.38104	2.34569	1.37e-05	-1	0.000335
2yrs	G	N05AX	Other antipsychotics	1290	28	26804	173	1.04329	0.2542	4.10422	2.83854	1.72469	4.67175	4.07e-05	-1	0.000895
2yrs	G	N02AA	Natural opium alkaloids	1197	121	25359	1618	0.42751	0.116821	3.65954	1.53343	1.21962	1.928	0.000253	-1	0.00464
2yrs	G	N05BA	Benzodiazepine derivatives [DG:DG01914]	1217	101	25514	1463	0.422534	0.118221	3.5741	1.52582	1.21024	1.92371	0.000352	-1	0.00596
2yrs	G	A11DA	Vitamin B1, plain	1279	39	26617	360	0.662879	0.217349	3.04984	1.94037	1.26727	2.97098	0.00229	-1	0.0335
2yrs	H	N05CD	Benzodiazepine derivatives	145	25	26695	282	2.66421	0.275246	9.67937	14.3566	8.3705	24.6236	4.01e-22	-1	4.17e-20
2yrs	H	N02AA	Natural opium alkaloids	130	40	25359	1618	1.6539	0.21906	7.54995	5.2273	3.40255	8.03065	4.49e-14	-1	2.33e-12
2yrs	H	A06AB	Contact laxatives	126	44	25495	1482	1.49826	0.21818	6.8671	4.47391	2.91718	6.86137	6.69e-12	-1	2.32e-10
2yrs	H	N06DX	Other anti-dementia drugs	152	18	26760	217	2.0089	0.336014	5.97861	7.4551	3.85855	14.404	2.28e-09	-1	5.93e-08
2yrs	H	A03BB	Belladonna alkaloids, semisynthetic, quaternary ammonium compounds	152	18	26146	831	1.48921	0.288058	5.16985	4.43361	2.52088	7.79764	2.36e-07	-1	4.91e-06
2yrs	H	N05BA	Benzodiazepine derivatives [DG:DG01914]	145	25	25514	1463	1.24032	0.256129	4.84256	3.45671	2.09236	5.71072	1.29e-06	-1	2.24e-05
2yrs	H	N05AX	Other antipsychotics	161	9	26804	173	1.95975	0.414954	4.7228	7.09753	3.14689	16.0078	2.34e-06	-1	3.48e-05
2yrs	H	N02BE	Anilides	78	92	19013	7964	0.778014	0.191574	4.06117	2.17714	1.49559	3.16929	4.9e-05	-1	0.000627
2yrs	H	N06DA	Anticholinesterases	154	16	26621	356	1.4003	0.346871	4.03696	4.05644	2.05529	8.006	5.43e-05	-1	0.000627
2yrs	H	A06AD	Osmotically acting laxatives	112	58	22899	4078	0.780717	0.196227	3.97865	2.18304	1.48602	3.20699	6.95e-05	-1	0.000723
5yrs	A	A06AA	Softeners, emollients	1196	122	2470	70	1.00054	0.186852	5.35471	2.71975	1.88551	3.92309	9.07e-08	-1	1.07e-05
5yrs	A	A06AD	Osmotically acting laxatives	955	363	2210	330	0.532692	0.101784	5.23354	1.70351	1.39534	2.07975	1.75e-07	-1	1.38e-05
5yrs	A	A06AB	Contact laxatives	1112	206	2402	138	0.703491	0.141922	4.95688	2.0208	1.52996	2.6691	7.47e-07	-1	4.41e-05
5yrs	A	H02AB	Glucocorticoids	964	354	2120	420	0.4024	0.0990067	4.06437	1.49541	1.23157	1.81577	4.91e-05	-1	0.00196
5yrs	A	A11DA	Vitamin B1, plain	1274	44	2528	12	1.66179	0.409193	4.06115	5.26875	2.36207	11.7523	4.98e-05	-1	0.00196
5yrs	A	N02AA	Natural opium alkaloids	1156	162	2410	130	0.55779	0.147359	3.78526	1.74681	1.3085	2.33194	0.000156	-1	0.00526
5yrs	A	A03FA	Propulsives [DG:DG01763]	1253	65	2484	56	0.750214	0.210686	3.56082	2.11745	1.40094	3.20042	0.000374	-1	0.011
5yrs	A	N05CD	Benzodiazepine derivatives	1273	45	2511	29	0.951213	0.278324	3.41765	2.58885	1.50011	4.46777	0.000638	-1	0.0167
5yrs	A	J01FA	Macrolides [DG:DG01551]	1054	264	2204	336	0.30975	0.102354	3.02626	1.36308	1.11525	1.666	0.00249	-1	0.0535
5yrs	A	C03CA	Sulfonamides, plain	1119	199	2392	148	0.440052	0.151972	2.89561	1.55279	1.15269	2.09176	0.00381	-1	0.0749
5yrs	B	N05CD	Benzodiazepine derivatives	143	27	3641	47	2.33358	0.335468	6.95618	10.3148	5.34341	19.9113	4.09e-12	-1	5.44e-10
5yrs	B	N02AA	Natural opium alkaloids	124	46	3442	246	1.27131	0.241329	5.26794	3.56551	2.22145	5.72277	1.46e-07	-1	9.71e-06
5yrs	B	A06AB	Contact laxatives	118	52	3396	292	1.01287	0.231538	4.37455	2.75351	1.74879	4.33545	1.25e-05	-1	0.000554
5yrs	B	A06AD	Osmotically acting laxatives	93	77	3072	616	0.861394	0.205235	4.1971	2.36646	1.58251	3.53875	2.77e-05	-1	0.000921
5yrs	B	N05AX	Other antipsychotics	156	14	3640	48	1.56313	0.399753	3.91025	4.77375	2.18013	10.4529	9.38e-05	-1	0.0025
5yrs	B	A11DA	Vitamin B1, plain	157	13	3645	43	1.49533	0.431852	3.46259	4.46079	1.91294	10.4021	0.000541	-1	0.012
5yrs	B	A11CC	Vitamin D and analogues	133	37	3323	365	0.833641	0.258041	3.23065	2.30168	1.38781	3.81733	0.00125	-1	0.0223
5yrs	B	N02BE	Anilides	54	116	2266	1422	0.662586	0.209558	3.16183	1.9398	1.28625	2.92543	0.00158	-1	0.0223
5yrs	B	A11EX	Vitamin B-complex, other combinations	164	6	3663	25	1.94326	0.617711	3.14591	6.98148	2.07963	23.4374	0.00167	-1	0.0223
5yrs	B	A06AX	Other drugs for constipation	162	8	3643	45	1.48609	0.472662	3.14409	4.41979	1.74962	11.165	0.00168	-1	0.0223
5yrs	C	A06AB	Contact laxatives	1112	206	378299	14843	1.10445	0.0942694	11.7159	3.01756	2.5085	3.62994	1.07e-31	-1	2.7e-29
5yrs	C	N06DX	Other anti-dementia drugs	1275	43	391994	1148	2.08901	0.211467	9.87869	8.07693	5.33636	12.225	5.18e-23	-1	6.53e-21
5yrs	C	A06AD	Osmotically acting laxatives	955	363	345775	47367	0.711038	0.0732513	9.70682	2.0361	1.76379	2.35045	2.84e-22	-1	2.39e-20
5yrs	C	A06AA	Softeners, emollients	1196	122	383186	9956	1.04457	0.113473	9.20547	2.84217	2.27542	3.55008	3.42e-20	-1	2.15e-18
5yrs	C	N05CD	Benzodiazepine derivatives	1273	45	390217	2925	1.43875	0.167833	8.5725	4.21543	3.03376	5.85737	1.02e-17	-1	5.14e-16
5yrs	C	N06DA	Anticholinesterases	1264	54	390590	2552	1.56688	0.184715	8.48272	4.79169	3.33625	6.88206	2.21e-17	-1	9.28e-16
5yrs	C	N02AA	Natural opium alkaloids	1156	162	377818	15324	0.840464	0.103068	8.15443	2.31744	1.89355	2.83623	3.52e-16	-1	1.27e-14
5yrs	C	N05AX	Other antipsychotics	1280	38	391830	1312	1.53567	0.204758	7.49993	4.64443	3.10915	6.93782	6.4e-14	-1	1.79e-12
5yrs	C	J01CA	Penicillins with extended spectrum [DG:DG01780]	722	596	273395	119747	0.395044	0.0613	6.44444	1.48445	1.3164	1.67396	1.16e-10	-1	2.92e-09
5yrs	C	N05BA	Benzodiazepine derivatives [DG:DG01914]	1155	163	367816	25326	0.582165	0.0929341	6.26428	1.78991	1.49185	2.14752	3.75e-10	-1	8.59e-09
5yrs	D	N05CD	Benzodiazepine derivatives	143	27	390217	2925	2.89449	0.245785	11.7765	18.0743	11.1647	29.26	5.22e-32	-1	6.94e-30
5yrs	D	N02AA	Natural opium alkaloids	124	46	377818	15324	1.81291	0.212335	8.53794	6.12823	4.04198	9.29129	1.37e-17	-1	9.11e-16
5yrs	D	A06AB	Contact laxatives	118	52	378299	14843	1.76224	0.207575	8.48967	5.8255	3.87833	8.75028	2.08e-17	-1	9.22e-16
5yrs	D	N05AX	Other antipsychotics	156	14	391830	1312	2.81363	0.349586	8.04847	16.6703	8.40185	33.0759	8.41e-16	-1	2.8e-14
5yrs	D	N06DX	Other anti-dementia drugs	152	18	391994	1148	2.4619	0.35453	6.94412	11.7271	5.85346	23.4946	3.81e-12	-1	1.01e-10
5yrs	D	A06AD	Osmotically acting laxatives	93	77	345775	47367	1.29405	0.188411	6.86825	3.64754	2.5213	5.27686	6.51e-12	-1	1.44e-10
5yrs	D	A11DA	Vitamin B1, plain	157	13	390722	2420	2.11658	0.350244	6.04315	8.30268	4.17916	16.4948	1.51e-09	-1	2.87e-08
5yrs	D	N06DA	Anticholinesterases	149	21	390590	2552	1.93475	0.326826	5.9198	6.92229	3.64799	13.1355	3.23e-09	-1	5.37e-08
5yrs	D	N02BE	Anilides	54	116	281164	111978	1.13752	0.202479	5.61798	3.11904	2.09734	4.63844	1.93e-08	-1	2.85e-07
5yrs	D	N05AD	Butyrophenone derivatives [DG:DG01940]	163	7	392783	359	2.68471	0.482243	5.56713	14.654	5.69467	37.7088	2.59e-08	-1	3.44e-07
5yrs	E	N06DX	Other anti-dementia drugs	3774	84	391994	1148	2.05092	0.149202	13.7459	7.77502	5.80364	10.416	5.51e-43	-1	1.59e-40
5yrs	E	N06DA	Anticholinesterases	3749	109	390590	2552	1.58106	0.125032	12.6452	4.8601	3.8038	6.20974	1.21e-36	-1	1.75e-34
5yrs	E	N02BE	Anilides	2320	1538	281164	111978	0.413565	0.0364856	11.335	1.5122	1.40784	1.6243	8.9e-30	-1	8.57e-28
5yrs	E	A06AB	Contact laxatives	3514	344	378299	14843	0.737277	0.0676608	10.8967	2.09024	1.83064	2.38665	1.21e-27	-1	8.74e-26
5yrs	E	J01CA	Penicillins with extended spectrum [DG:DG01780]	2323	1535	273395	119747	0.356332	0.0339368	10.4999	1.42808	1.33618	1.5263	8.72e-26	-1	5.04e-24
5yrs	E	N02AJ	Opioids in combination with non-opioid analgesics	2883	975	320833	72309	0.320647	0.0395023	8.11719	1.37802	1.27535	1.48895	4.79e-16	-1	2.31e-14
5yrs	E	M02AA	Antiinflammatory preparations, non-steroids for topical use	2845	1013	313329	79813	0.326312	0.0405442	8.0483	1.38585	1.27998	1.50047	8.42e-16	-1	3.48e-14
5yrs	E	A06AD	Osmotically acting laxatives	3165	693	345775	47367	0.367368	0.047578	7.72138	1.44393	1.31537	1.58505	1.15e-14	-1	4.15e-13
5yrs	E	N05CD	Benzodiazepine derivatives	3784	74	390217	2925	0.962554	0.129447	7.43588	2.61838	2.03164	3.37457	1.04e-13	-1	3.34e-12
5yrs	E	N05AX	Other antipsychotics	3796	62	391830	1312	1.12522	0.154624	7.27715	3.08089	2.27541	4.1715	3.42e-13	-1	9.2e-12
5yrs	F	N06DX	Other anti-dementia drugs	3774	84	26742	235	1.28762	0.159658	8.0649	3.62417	2.65034	4.95581	7.59e-16	-1	1.11e-13
5yrs	F	N06DA	Anticholinesterases	3749	109	26567	410	1.03532	0.135347	7.64938	2.81601	2.15984	3.67153	2.08e-14	-1	2e-12
5yrs	F	N05AX	Other antipsychotics	3796	62	26742	235	0.686571	0.176415	3.8918	1.98689	1.40606	2.80766	9.97e-05	-1	0.00319
5yrs	F	N05CD	Benzodiazepine derivatives	3784	74	26562	415	0.422827	0.142098	2.97561	1.52627	1.15524	2.01646	0.00293	-1	0.0348
5yrs	F	M02AA	Antiinflammatory preparations, non-steroids for topical use	2845	1013	19359	7618	0.129278	0.0437261	2.95655	1.13801	1.04454	1.23984	0.00311	-1	0.0348
5yrs	F	D01BA	Antifungals for systemic use	3734	124	26268	709	0.289993	0.0989108	2.93186	1.33642	1.1009	1.62233	0.00337	-1	0.0348
5yrs	F	J01CA	Penicillins with extended spectrum [DG:DG01780]	2323	1535	16107	10870	0.102991	0.0368076	2.79808	1.10848	1.03133	1.19141	0.00514	-1	0.0496
5yrs	F	A06AB	Contact laxatives	3514	344	24708	2269	0.19909	0.0724176	2.74919	1.22029	1.05881	1.4064	0.00598	-1	0.0515
5yrs	F	D06BA	Sulfonamides	3835	23	26880	97	0.631359	0.26793	2.35643	1.88016	1.11205	3.17883	0.0185	-1	0.107
5yrs	F	N07BC	Drugs used in opioid dependence	3850	8	26948	29	1.03663	0.464127	2.2335	2.8197	1.13533	7.00299	0.0255	-1	0.132
5yrs	G	N06DX	Other anti-dementia drugs	1275	43	26742	235	1.38189	0.213716	6.46602	3.98244	2.61954	6.05442	1.02e-10	-1	2.57e-08
5yrs	G	A06AB	Contact laxatives	1112	206	24708	2269	0.594465	0.0966468	6.15091	1.81206	1.49935	2.18999	7.81e-10	-1	9.84e-08
5yrs	G	N06DA	Anticholinesterases	1264	54	26567	410	1.09287	0.1906	5.73383	2.98281	2.05296	4.33383	9.92e-09	-1	8.33e-07
5yrs	G	N05CD	Benzodiazepine derivatives	1273	45	26562	415	0.908996	0.178206	5.10082	2.48183	1.75015	3.51939	3.4e-07	-1	1.71e-05
5yrs	G	N05AX	Other antipsychotics	1280	38	26742	235	1.06709	0.22211	4.80431	2.9069	1.88088	4.4926	1.56e-06	-1	6.55e-05
5yrs	G	A06AA	Softeners, emollients	1196	122	25403	1574	0.479067	0.117043	4.09308	1.61457	1.28358	2.0309	4.27e-05	-1	0.0012
5yrs	G	B03BB	Folic acid and derivatives	1154	164	24869	2108	0.35172	0.108561	3.23983	1.42151	1.14905	1.75858	0.0012	-1	0.023
5yrs	G	G03AA	Progestogens and estrogens, fixed combinations	1313	5	26929	48	1.17426	0.396416	2.96219	3.23575	1.48775	7.03753	0.00306	-1	0.0514
5yrs	G	A06AD	Osmotically acting laxatives	955	363	20918	6059	0.20981	0.0744506	2.81811	1.23344	1.06597	1.42723	0.00483	-1	0.0677
5yrs	G	A11DA	Vitamin B1, plain	1274	44	26524	453	0.556315	0.201776	2.75709	1.74423	1.17448	2.59038	0.00583	-1	0.0735
5yrs	H	N05CD	Benzodiazepine derivatives	143	27	26562	415	2.41605	0.260279	9.28254	11.2015	6.72537	18.6567	1.78e-20	-1	2.37e-18
5yrs	H	N02AA	Natural opium alkaloids	124	46	24563	2414	1.30797	0.21379	6.11801	3.69865	2.43252	5.62379	9.61e-10	-1	6.39e-08
5yrs	H	A06AB	Contact laxatives	118	52	24708	2269	1.24881	0.20883	5.98003	3.48619	2.31519	5.24947	2.26e-09	-1	8.71e-08
5yrs	H	N05AX	Other antipsychotics	156	14	26742	235	2.15444	0.361725	5.956	8.62302	4.2437	17.5216	2.62e-09	-1	8.71e-08
5yrs	H	N06DX	Other anti-dementia drugs	152	18	26742	235	1.91524	0.339382	5.64334	6.7886	3.49048	13.2031	1.68e-08	-1	4.47e-07
5yrs	H	N06DA	Anticholinesterases	149	21	26567	410	1.52884	0.328934	4.64787	4.61283	2.42084	8.78961	3.37e-06	-1	7.47e-05
5yrs	H	A11DA	Vitamin B1, plain	157	13	26524	453	1.63903	0.357082	4.59005	5.15015	2.55774	10.3701	4.45e-06	-1	8.45e-05
5yrs	H	A06AD	Osmotically acting laxatives	93	77	20918	6059	0.804962	0.187408	4.29524	2.23661	1.54904	3.22938	1.75e-05	-1	0.000291
5yrs	H	N02BE	Anilides	54	116	15452	11525	0.769724	0.201556	3.81891	2.15917	1.4545	3.20523	0.000134	-1	0.00179
5yrs	H	N05AD	Butyrophenone derivatives [DG:DG01940]	163	7	26897	80	1.98103	0.520847	3.80347	7.25018	2.61206	20.124	0.000143	-1	0.00179

## Sheet: b)summary by freq
Window	drug	Full name	freq
6m	A06AB	Contact laxatives	8
6m	J01CA	Penicillins with extended spectrum [DG:DG01780]	8
6m	A06AD	Osmotically acting laxatives	7
6m	J01AA	Tetracyclines [DG:DG01197]	7
6m	N05CD	Benzodiazepine derivatives	7
6m	N02AA	Natural opium alkaloids	6
6m	J07BB	Influenza vaccines	5
6m	N02BE	Anilides	5
6m	H02AB	Glucocorticoids	4
6m	A03BB	Belladonna alkaloids, semisynthetic, quaternary ammonium compounds	3
6m	N06DX	Other anti-dementia drugs	3
6m	A06AA	Softeners, emollients	2
6m	J01XE	Nitrofuran derivatives	2
6m	N05AX	Other antipsychotics	2
6m	N05BA	Benzodiazepine derivatives [DG:DG01914]	2
6m	R06AE	Piperazine derivatives	2
6m	D06BA	Sulfonamides	1
6m	G03AC	Progestogens	1
6m	J01CR	Combinations of penicillins, incl. beta-lactamase inhibitors	1
6m	J01FA	Macrolides [DG:DG01551]	1
6m	M05BA	Bisphosphonates [DG:DG01600]	1
6m	N03AX	Other antiepileptics	1
6m	N06DA	Anticholinesterases	1
1yrs	A06AB	Contact laxatives	8
1yrs	A06AD	Osmotically acting laxatives	7
1yrs	N05CD	Benzodiazepine derivatives	7
1yrs	J01CA	Penicillins with extended spectrum [DG:DG01780]	6
1yrs	N05BA	Benzodiazepine derivatives [DG:DG01914]	6
1yrs	N02AA	Natural opium alkaloids	5
1yrs	J01AA	Tetracyclines [DG:DG01197]	4
1yrs	N02BE	Anilides	4
1yrs	A03BB	Belladonna alkaloids, semisynthetic, quaternary ammonium compounds	3
1yrs	A06AA	Softeners, emollients	3
1yrs	J01CF	Beta-lactamase resistant penicillins [DG:DG01779]	3
1yrs	J01XE	Nitrofuran derivatives	3
1yrs	N06DX	Other anti-dementia drugs	3
1yrs	D06BA	Sulfonamides	2
1yrs	N05AX	Other antipsychotics	2
1yrs	A03FA	Propulsives [DG:DG01763]	1
1yrs	A09AB	Acid preparations	1
1yrs	A11DA	Vitamin B1, plain	1
1yrs	D01BA	Antifungals for systemic use	1
1yrs	G03AC	Progestogens	1
1yrs	H02AB	Glucocorticoids	1
1yrs	J01CR	Combinations of penicillins, incl. beta-lactamase inhibitors	1
1yrs	J01DH	Carbapenems [DG:DG01458]	1
1yrs	M05BA	Bisphosphonates [DG:DG01600]	1
1yrs	N03AX	Other antiepileptics	1
1yrs	N06DA	Anticholinesterases	1
1yrs	R02AX	Other throat preparetions	1
1yrs	R06AE	Piperazine derivatives	1
1yrs	S01AD	Antivirals	1
2yrs	A06AB	Contact laxatives	8
2yrs	N05CD	Benzodiazepine derivatives	7
2yrs	N06DX	Other anti-dementia drugs	7
2yrs	A06AD	Osmotically acting laxatives	6
2yrs	N02AA	Natural opium alkaloids	6
2yrs	N05BA	Benzodiazepine derivatives [DG:DG01914]	6
2yrs	N02BE	Anilides	5
2yrs	N06DA	Anticholinesterases	5
2yrs	N05AX	Other antipsychotics	4
2yrs	A03BB	Belladonna alkaloids, semisynthetic, quaternary ammonium compounds	3
2yrs	A06AA	Softeners, emollients	3
2yrs	J01CA	Penicillins with extended spectrum [DG:DG01780]	3
2yrs	M02AA	Antiinflammatory preparations, non-steroids for topical use	2
2yrs	A03FA	Propulsives [DG:DG01763]	1
2yrs	A11CC	Vitamin D and analogues	1
2yrs	A11DA	Vitamin B1, plain	1
2yrs	C03CA	Sulfonamides, plain	1
2yrs	D01BA	Antifungals for systemic use	1
2yrs	D09AA	Medicated dressings with antiinfectives	1
2yrs	G03AA	Progestogens and estrogens, fixed combinations	1
2yrs	G03AC	Progestogens	1
2yrs	H02AB	Glucocorticoids	1
2yrs	J01AA	Tetracyclines [DG:DG01197]	1
2yrs	J01CF	Beta-lactamase resistant penicillins [DG:DG01779]	1
2yrs	J01DH	Carbapenems [DG:DG01458]	1
2yrs	J01XE	Nitrofuran derivatives	1
2yrs	N03AX	Other antiepileptics	1
2yrs	N07BC	Drugs used in opioid dependence	1
5yrs	A06AB	Contact laxatives	8
5yrs	N05CD	Benzodiazepine derivatives	8
5yrs	A06AD	Osmotically acting laxatives	7
5yrs	N05AX	Other antipsychotics	7
5yrs	N06DA	Anticholinesterases	6
5yrs	N06DX	Other anti-dementia drugs	6
5yrs	N02AA	Natural opium alkaloids	5
5yrs	A11DA	Vitamin B1, plain	4
5yrs	N02BE	Anilides	4
5yrs	A06AA	Softeners, emollients	3
5yrs	J01CA	Penicillins with extended spectrum [DG:DG01780]	3
5yrs	M02AA	Antiinflammatory preparations, non-steroids for topical use	2
5yrs	N05AD	Butyrophenone derivatives [DG:DG01940]	2
5yrs	R03CC	Selective beta-2-adrenoreceptor agonists	2
5yrs	A03FA	Propulsives [DG:DG01763]	1
5yrs	A06AX	Other drugs for constipation	1
5yrs	A11CC	Vitamin D and analogues	1
5yrs	A11EX	Vitamin B-complex, other combinations	1
5yrs	B03BB	Folic acid and derivatives	1
5yrs	C03CA	Sulfonamides, plain	1
5yrs	D01BA	Antifungals for systemic use	1
5yrs	D06BA	Sulfonamides	1
5yrs	G03AA	Progestogens and estrogens, fixed combinations	1
5yrs	H02AB	Glucocorticoids	1
5yrs	J01FA	Macrolides [DG:DG01551]	1
5yrs	N02AJ	Opioids in combination with non-opioid analgesics	1
5yrs	N05BA	Benzodiazepine derivatives [DG:DG01914]	1
