# Supplementary material for: Exploring Drugs and Vaccines Associated with Altered Risks and Severity of COVID-19: A UK Biobank Cohort Study of All ATC Level-4 Drug Categories Reveals Repositioning Opportunities
Source: Pharmaceutics. 2021 Sep 18;13(9):1514. doi: 10.3390/pharmaceutics13091514 (PMC8471264; doi:10.3390/pharmaceutics13091514)
Supplement: Supplementary file 1 [file pharmaceutics-13-01514-s001.zip › Table S6 all results across models and time-windows.xlsx]

## Sheet: all_data
Window	Model	drug	Full name	case_notx	case_tx	ctrl_notx	ctrl_tx	estimate	std.error	statistic	OR	conf.low	conf.high	p	sig	p.adj
6m	A	A01AB	Antiinfectives and antiseptics for local oral treatment	1286	32	2505	35	0.480833	0.266769	1.80243	1.61742	0.958687	2.72879	0.0716	0	0.215
6m	A	A01AD	Other agents for local oral treatment	1306	12	2532	8	0.694916	0.514047	1.35185	2.00354	0.731311	5.48901	0.176	0	0.38
6m	A	A02BA	H2-receptor antagonists [DG:DG01481]	1283	35	2524	16	1.01365	0.343709	2.94915	2.75564	1.40464	5.40605	0.00321	-1	0.0208
6m	A	A02BC	Proton pump inhibitors [DG:DG01646]	925	393	1945	595	-0.0975539	0.0911728	-1.06999	0.907053	0.758581	1.08459	0.285	0	0.512
6m	A	A02BX	Other drugs for peptic ulcer and gastro-oesophageal reflux disease (GORD)	1271	47	2484	56	-0.0551893	0.235997	-0.233856	0.946306	0.595781	1.50306	0.815	0	0.893
6m	A	A03AA	Synthetic anticholinergics, esters with tertiary amino group	1305	13	2523	17	0.209357	0.425147	0.492435	1.23289	0.535701	2.83742	0.622	0	0.754
6m	A	A03AX	Other drugs for functional gastrointestinal disorders	1313	5	2531	9	-0.356797	0.68785	-0.518713	0.699915	0.181703	2.69606	0.604	0	0.747
6m	A	A03BB	Belladonna alkaloids, semisynthetic, quaternary ammonium compounds	1285	33	2520	20	0.878113	0.312741	2.80779	2.40635	1.30337	4.44273	0.00501	-1	0.0299
6m	A	A03FA	Propulsives [DG:DG01763]	1295	23	2535	5	2.06951	0.580484	3.56515	7.92096	2.53812	24.7197	0.000368	-1	0.00336
6m	A	A06AA	Softeners, emollients	1251	67	2518	22	1.53156	0.31421	4.87432	4.62538	2.49809	8.56422	1.14e-06	-1	2.12e-05
6m	A	A06AB	Contact laxatives	1210	108	2501	39	1.24306	0.231505	5.36946	3.46619	2.20157	5.45723	8.37e-08	-1	1.78e-06
6m	A	A06AC	Bulk-forming laxatives	1312	6	2535	5	0.37674	0.625779	0.602033	1.45752	0.42735	4.97105	0.547	0	0.745
6m	A	A06AD	Osmotically acting laxatives	1165	153	2440	100	0.947507	0.159612	5.93632	2.57927	1.88622	3.52697	3.17e-09	-1	8.37e-08
6m	A	A06AG	Enemas	1312	6	2534	6	0.0603209	0.723009	0.0834303	1.06218	0.257381	4.38347	0.933	0	0.947
6m	A	A07AA	Antibiotics	1297	21	2531	9	0.932938	0.455884	2.04644	2.54197	1.03992	6.21357	0.0408	-1	0.16
6m	A	A07DA	Antipropulsives	1285	33	2520	20	0.570248	0.3341	1.70682	1.76871	0.918711	3.40512	0.0879	0	0.238
6m	A	A07EC	Aminosalicylic acid and similar agents	1302	16	2524	16	0.496625	0.398543	1.2461	1.64317	0.752201	3.58946	0.213	0	0.429
6m	A	A10AB	Insulins and analogues for injection, fast-acting	1238	80	2493	47	0.421072	0.271257	1.5523	1.52359	0.895163	2.5932	0.121	0	0.31
6m	A	A10AC	Insulins and analogues for injection, intermediate-acting	1305	13	2534	6	0.370126	0.732083	0.505579	1.44792	0.344664	6.08262	0.613	0	0.749
6m	A	A10AD	Insulins and analogues for injection, intermediate- or long-acting combined with fast-acting	1291	27	2530	10	0.210619	0.518658	0.406084	1.23444	0.446528	3.41266	0.685	0	0.791
6m	A	A10AE	Insulins and analogues for injection, long-acting	1296	22	2531	9	0.534401	0.560627	0.95322	1.70643	0.568499	5.12206	0.341	0	0.583
6m	A	A10BA	Biguanides [DG:DG01684]	1196	122	2391	149	-0.358767	0.190516	-1.88313	0.698537	0.480807	1.01486	0.0598	0	0.202
6m	A	A10BB	Sulfonylureas	1286	32	2488	52	-0.487483	0.312562	-1.55964	0.61417	0.332776	1.13351	0.119	0	0.31
6m	A	A10BH	Dipeptidyl peptidase 4 (DPP-4) inhibitors [DG:DG01601]	1283	35	2498	42	-0.412944	0.326621	-1.26429	0.6617	0.348781	1.25536	0.206	0	0.42
6m	A	A10BJ	Glucagon-like peptide-1 receptor (GLP-1) analogues	1309	9	2523	17	-0.974482	0.646521	-1.50727	0.377388	0.106241	1.34055	0.132	0	0.315
6m	A	A10BK	Sodium-glucose co-transporter 2 (SGLT2) inhibitors	1298	20	2507	33	-0.232255	0.358942	-0.647053	0.792744	0.392197	1.60237	0.518	0	0.734
6m	A	A11CC	Vitamin D and analogues	1272	46	2502	38	0.416944	0.273765	1.523	1.51732	0.887101	2.59525	0.128	0	0.312
6m	A	A11DA	Vitamin B1, plain	1289	29	2534	6	1.9398	0.595932	3.25508	6.95739	2.16286	22.3802	0.00114	-1	0.00811
6m	A	A12AX	Calcium, combinations with vitamin D and/or other drugs	1161	157	2404	136	0.347545	0.149947	2.31779	1.41559	1.05502	1.89938	0.0205	-1	0.0898
6m	A	B01AA	Vitamin K antagonists	1288	30	2512	28	0.231998	0.353658	0.655994	1.26112	0.630414	2.52281	0.512	0	0.734
6m	A	B01AC	Platelet aggregation inhibitors excl. heparin	1112	206	2309	231	-0.214784	0.139904	-1.53522	0.806716	0.613192	1.06132	0.125	0	0.31
6m	A	B01AF	Direct factor Xa inhibitors	1201	117	2446	94	0.443534	0.177342	2.50101	1.5582	1.10058	2.2061	0.0124	-1	0.0617
6m	A	B03AA	Iron bivalent, oral preparations	1240	78	2507	33	0.959461	0.271075	3.53946	2.61029	1.53418	4.44121	0.000406	-1	0.00336
6m	A	B03BA	Vitamin B12 (cyanocobalamin and analogues)	1268	50	2499	41	0.463469	0.251641	1.84179	1.58958	0.970548	2.60343	0.0656	0	0.21
6m	A	B03BB	Folic acid and derivatives	1245	73	2487	53	0.301339	0.235456	1.27981	1.35167	0.851895	2.14464	0.201	0	0.415
6m	A	B05CB	Salt solutions	1310	8	2534	6	0.458561	0.65984	0.694957	1.5818	0.433826	5.76747	0.487	0	0.718
6m	A	C01AA	Digitalis glycosides [DG:DG01697]	1303	15	2521	19	0.00370562	0.47289	0.0078361	1.00371	0.397152	2.53666	0.994	0	0.994
6m	A	C01DA	Organic nitrates	1250	68	2483	57	0.0220117	0.258745	0.0850709	1.02226	0.615525	1.69775	0.932	0	0.947
6m	A	C01EB	Other cardiac preparations	1309	9	2526	14	-0.495534	0.578011	-0.857309	0.609246	0.19617	1.89213	0.391	0	0.621
6m	A	C02CA	Alpha-adrenoreceptor antagonists	1283	35	2500	40	-0.318528	0.296818	-1.07314	0.727218	0.406381	1.30136	0.283	0	0.512
6m	A	C03AA	Thiazides, plain [DG:DG01749]	1274	44	2474	66	-0.228765	0.236333	-0.967975	0.795516	0.500516	1.26439	0.333	0	0.577
6m	A	C03BA	Sulfonamides, plain	1282	36	2502	38	0.152744	0.283864	0.538089	1.16503	0.667781	2.03253	0.591	0	0.747
6m	A	C03CA	Sulfonamides, plain	1200	118	2479	61	0.632385	0.217279	2.91048	1.88209	1.22923	2.88169	0.00363	-1	0.0225
6m	A	C03DA	Aldosterone antagonists	1291	27	2519	21	0.244756	0.374364	0.653791	1.27731	0.613107	2.66107	0.513	0	0.734
6m	A	C05AX	Other agents for treatment of hemorrhoids and anal fissures for topical use	1305	13	2524	16	-0.0620064	0.469555	-0.132054	0.939877	0.374334	2.35984	0.895	0	0.946
6m	A	C07AA	Beta blocking agents, non-selective	1303	15	2523	17	0.944592	0.373827	2.52682	2.57176	1.23574	5.35221	0.0115	-1	0.0593
6m	A	C07AB	Beta blocking agents, selective	1132	186	2328	212	-0.0139581	0.139591	-0.0999925	0.986139	0.750033	1.29657	0.92	0	0.947
6m	A	C07AG	Alpha and beta blocking agents	1310	8	2535	5	0.56123	0.759569	0.73888	1.75283	0.395356	7.77122	0.46	0	0.705
6m	A	C08CA	Dihydropyridine derivatives [DG:DG01928]	1103	215	2217	323	-0.235303	0.116931	-2.01232	0.790331	0.628413	0.993969	0.0443	1	0.169
6m	A	C08DB	Benzothiazepine derivatives	1307	11	2526	14	-0.171127	0.520991	-0.328463	0.842715	0.303439	2.3404	0.743	0	0.838
6m	A	C09AA	ACE inhibitors, plain [DG:DG01501]	1132	186	2223	317	-0.384683	0.125037	-3.07656	0.680666	0.532683	0.86976	0.00211	1	0.0143
6m	A	C09CA	Angiotensin II receptor blockers, plain [DG:DG01495]	1208	110	2363	177	-0.276379	0.155467	-1.77774	0.758525	0.559236	1.02883	0.0755	0	0.216
6m	A	C10AA	HMG CoA reductase inhibitors [DG:DG01660]	895	423	1856	684	-0.565976	0.095497	-5.92664	0.567806	0.470854	0.684719	3.37e-09	1	8.37e-08
6m	A	C10AB	Fibrates	1309	9	2535	5	0.557206	0.777104	0.717028	1.74579	0.380461	8.01074	0.473	0	0.705
6m	A	C10AX	Other lipid modifying agents	1300	18	2519	21	-0.167733	0.390217	-0.429844	0.84558	0.393456	1.81724	0.667	0	0.789
6m	A	D01AC	Imidazole and triazole derivatives	1259	59	2484	56	0.144107	0.226552	0.636089	1.15501	0.740769	1.80089	0.525	0	0.738
6m	A	D01AE	Other antifungals for topical use	1312	6	2534	6	0.0927887	0.671423	0.138197	1.09723	0.294172	4.09256	0.89	0	0.946
6m	A	D01AX		1285	33	2518	22	0.622678	0.315184	1.9756	1.86391	1.00475	3.45776	0.0483	-1	0.174
6m	A	D02AC	Soft paraffin and fat products	1298	20	2515	25	-0.224785	0.370119	-0.607332	0.798688	0.386574	1.65015	0.544	0	0.745
6m	A	D02AE	Carbamide products	1308	10	2532	8	0.451619	0.555558	0.812912	1.57085	0.528561	4.66849	0.416	0	0.652
6m	A	D02AX	Other emollients and protectives	1197	121	2434	106	0.240855	0.166089	1.45015	1.27234	0.918717	1.76206	0.147	0	0.342
6m	A	D05AX	Other antipsoriatics for topical use	1310	8	2526	14	0.143571	0.480332	0.2989	1.15439	0.450157	2.96034	0.765	0	0.851
6m	A	D06AX	Other antibiotics for topical use	1308	10	2528	12	0.0957133	0.497222	0.192496	1.10044	0.415143	2.91701	0.847	0	0.922
6m	A	D07AA	Corticosteroids, weak (group I)	1303	15	2527	13	0.487157	0.395617	1.23138	1.62768	0.749399	3.53529	0.218	0	0.434
6m	A	D07AB	Corticosteroids, moderately potent (group II)	1300	18	2532	8	1.73484	0.477592	3.63246	5.66799	2.22215	14.4572	0.000284	-1	0.00283
6m	A	D07AC	Corticosteroids, potent (group III)	1279	39	2497	43	0.112285	0.256903	0.437072	1.11883	0.676113	1.85144	0.662	0	0.789
6m	A	D07AD	Corticosteroids, very potent (group IV)	1305	13	2528	12	0.617802	0.451059	1.36967	1.85485	0.766028	4.49129	0.171	0	0.375
6m	A	D07CA	Corticosteroids, weak, combinations with antibiotics	1309	9	2535	5	1.2936	0.631494	2.04848	3.6459	1.05708	12.5749	0.0406	-1	0.16
6m	A	D07CC	Corticosteroids, potent, combinations with antibiotics	1303	15	2519	21	-0.555902	0.459755	-1.20913	0.573555	0.232866	1.41268	0.227	0	0.445
6m	A	D09AA	Medicated dressings with antiinfectives	1312	6	2533	7	0.310302	0.675192	0.459576	1.36384	0.362958	5.1247	0.646	0	0.776
6m	A	D11AC	Medicated shampoos	1312	6	2531	9	-0.857761	0.809781	-1.05925	0.42411	0.0866911	2.07483	0.29	0	0.514
6m	A	G01AF	Imidazole derivatives	1304	14	2532	8	1.10617	0.538062	2.05583	3.02275	1.05259	8.68053	0.0399	-1	0.16
6m	A	G03BA	3-oxoandrosten (4) derivatives	1312	6	2529	11	-0.705326	0.606749	-1.16247	0.493947	0.150332	1.62296	0.245	0	0.468
6m	A	G03CA	Natural and semisynthetic estrogens, plain	1284	34	2463	77	0.0894598	0.21959	0.407395	1.09358	0.711014	1.682	0.684	0	0.791
6m	A	G04BD	Urinary antispasmodics	1280	38	2482	58	-0.165415	0.254267	-0.650557	0.847542	0.514826	1.39528	0.515	0	0.734
6m	A	G04BE	Drugs used in erectile dysfunction	1273	45	2475	65	0.124608	0.220974	0.563906	1.1327	0.734453	1.7469	0.573	0	0.747
6m	A	G04CA	Alpha-adrenoreceptor antagonists	1311	7	2533	7	-0.0680342	0.587737	-0.115756	0.934228	0.295129	2.95729	0.908	0	0.947
6m	A	G04CB	Testosterone-5-alpha reductase inhibitors	1286	32	2507	33	-0.19897	0.320144	-0.621501	0.819575	0.437517	1.53526	0.534	0	0.744
6m	A	H02AA	Mineralocorticoids	1312	6	2535	5	0.0607586	0.781785	0.0777178	1.06264	0.229467	4.92101	0.938	0	0.947
6m	A	H02AB	Glucocorticoids	1196	122	2474	66	1.17374	0.185581	6.32469	3.23407	2.24767	4.65334	2.83e-10	-1	1.41e-08
6m	A	H03AA	Thyroid hormones	1237	81	2370	170	-0.299365	0.161325	-1.85566	0.741288	0.540286	1.01707	0.0636	0	0.21
6m	A	J01AA	Tetracyclines [DG:DG01197]	1198	120	2475	65	1.12842	0.175473	6.43073	3.09077	2.19107	4.35991	1.43e-10	-1	1.07e-08
6m	A	J01CA	Penicillins with extended spectrum [DG:DG01780]	1161	157	2445	95	1.19073	0.150941	7.8887	3.28948	2.44684	4.42231	3.95e-15	-1	5.89e-13
6m	A	J01CE	Beta-lactamase sensitive penicillins [DG:DG01778]	1310	8	2532	8	0.531401	0.589989	0.900697	1.70131	0.53509	5.40932	0.368	0	0.596
6m	A	J01CF	Beta-lactamase resistant penicillins [DG:DG01779]	1239	79	2489	51	0.880682	0.215452	4.0876	2.41254	1.58134	3.68066	4.45e-05	-1	0.000553
6m	A	J01CR	Combinations of penicillins, incl. beta-lactamase inhibitors	1273	45	2521	19	1.32453	0.315527	4.19785	3.76044	2.02571	6.98072	2.76e-05	-1	0.000411
6m	A	J01DB	First-generation cephalosporins [DG:DG01774]	1303	15	2533	7	1.04682	0.584656	1.79048	2.84857	0.905335	8.96279	0.0735	0	0.215
6m	A	J01EA	Trimethoprim and derivatives [DG:DG01581]	1288	30	2522	18	0.890633	0.341105	2.61102	2.43667	1.24841	4.75596	0.00906	-1	0.0482
6m	A	J01FA	Macrolides [DG:DG01551]	1265	53	2510	30	1.18486	0.2612	4.53622	3.27024	1.95963	5.45738	5.9e-06	-1	9.77e-05
6m	A	J01MA	Fluoroquinolones [DG:DG01549]	1304	14	2533	7	1.00355	0.559185	1.79467	2.72795	0.911397	8.16519	0.0728	0	0.215
6m	A	J01XE	Nitrofuran derivatives	1234	84	2465	75	0.661129	0.186093	3.55269	1.93698	1.34485	2.78982	0.000386	-1	0.00336
6m	A	J02AC	Triazole derivatives	1306	12	2529	11	0.795845	0.465593	1.70931	2.21631	0.889595	5.52166	0.0875	0	0.238
6m	A	J05AB	Nucleosides and nucleotides excl. reverse transcriptase inhibitors [DG:DG02840]	1303	15	2522	18	0.541093	0.379909	1.42427	1.71788	0.815666	3.61806	0.154	0	0.349
6m	A	L02BG	Aromatase inhibitors [DG:DG01596]	1309	9	2517	23	-0.219812	0.419107	-0.524477	0.80267	0.352923	1.82555	0.6	0	0.747
6m	A	L04AX	Other immunosuppressants	1305	13	2515	25	-0.359736	0.395327	-0.90997	0.697861	0.321484	1.51488	0.363	0	0.596
6m	A	M01AB	Acetic acid derivatives and related substances	1311	7	2530	10	0.302582	0.512755	0.590111	1.35335	0.495238	3.69833	0.555	0	0.745
6m	A	M01AE	Propionic acid derivatives	1271	47	2460	80	0.0819367	0.200666	0.408324	1.08539	0.732358	1.60859	0.683	0	0.791
6m	A	M01AH	Coxibs	1312	6	2534	6	0.585324	0.646615	0.905213	1.79557	0.505394	6.37935	0.365	0	0.596
6m	A	M02AA	Antiinflammatory preparations, non-steroids for topical use	1233	85	2450	90	0.101116	0.188262	0.537101	1.1064	0.764918	1.60034	0.591	0	0.747
6m	A	M04AA	Preparations inhibiting uric acid production	1265	53	2471	69	-0.375081	0.249811	-1.50146	0.687234	0.421112	1.12153	0.133	0	0.315
6m	A	M04AC	Preparations with no effect on uric acid metabolism	1307	11	2529	11	0.293494	0.570146	0.51477	1.3411	0.438531	4.10133	0.607	0	0.747
6m	A	M05BA	Bisphosphonates [DG:DG01600]	1262	56	2491	49	0.397126	0.226174	1.75584	1.48754	0.954749	2.31766	0.0792	0	0.223
6m	A	N01BB	Amides	1304	14	2532	8	1.43853	0.519815	2.7674	4.21452	1.52104	11.6776	0.00568	-1	0.0326
6m	A	N02AA	Natural opium alkaloids	1230	88	2513	27	1.53566	0.253746	6.05193	4.64437	2.82403	7.63809	1.57e-09	-1	5.85e-08
6m	A	N02AE	Oripavine derivatives	1294	24	2523	17	0.234785	0.430031	0.545974	1.26464	0.544261	2.93849	0.585	0	0.747
6m	A	N02AJ	Opioids in combination with non-opioid analgesics	1217	101	2419	121	0.191033	0.163024	1.17181	1.2105	0.879336	1.66638	0.241	0	0.466
6m	A	N02AX	Other opioids	1282	36	2506	34	0.0738988	0.311833	0.236982	1.0767	0.584221	1.98432	0.813	0	0.893
6m	A	N02BE	Anilides	1004	314	2246	294	0.385815	0.110543	3.49018	1.47081	1.18422	1.82676	0.000488	-1	0.00364
6m	A	N02CC	Selective serotonin (5HT1) agonists [DG:DG01943]	1311	7	2509	31	-0.554264	0.411751	-1.34611	0.574495	0.256267	1.28789	0.178	0	0.38
6m	A	N03AB	Hydantoin derivatives	1313	5	2535	5	0.66676	0.778405	0.856572	1.94792	0.42343	8.96106	0.392	0	0.621
6m	A	N03AF	Carboxamide derivatives	1307	11	2534	6	0.934842	0.605921	1.54285	2.54681	0.776378	8.35449	0.123	0	0.31
6m	A	N03AG	Fatty acid derivatives	1309	9	2528	12	-0.32306	0.6093	-0.530215	0.723931	0.219228	2.39055	0.596	0	0.747
6m	A	N03AX	Other antiepileptics	1186	132	2457	83	0.735242	0.176947	4.15515	2.08599	1.4745	2.95105	3.32e-05	-1	0.00045
6m	A	N04BA	Dopa and dopa derivatives	1294	24	2526	14	0.978962	0.394574	2.48106	2.66169	1.22797	5.76934	0.0131	-1	0.063
6m	A	N04BC	Dopamine agonists	1303	15	2530	10	0.512269	0.468475	1.09348	1.66907	0.666168	4.18184	0.274	0	0.511
6m	A	N05AB	Phenothiazines with piperazine structure	1295	23	2530	10	1.60261	0.423692	3.78249	4.96598	2.16393	11.3964	0.000158	-1	0.00168
6m	A	N05AH	Diazepines, oxazepines and thiazepines	1308	10	2523	17	-0.164973	0.47949	-0.34406	0.847916	0.331193	2.17082	0.731	0	0.831
6m	A	N05AX	Other antipsychotics	1298	20	2528	12	0.790997	0.432621	1.82838	2.20559	0.944412	5.15098	0.0676	0	0.21
6m	A	N05BA	Benzodiazepine derivatives [DG:DG01914]	1272	46	2494	46	0.557573	0.240027	2.32296	1.74643	1.09088	2.79593	0.0202	-1	0.0898
6m	A	N05CD	Benzodiazepine derivatives	1285	33	2523	17	0.941246	0.349068	2.69645	2.56317	1.29288	5.08159	0.00704	-1	0.0389
6m	A	N05CF	Benzodiazepine related drugs	1288	30	2502	38	0.203223	0.278185	0.730533	1.22535	0.710219	2.1141	0.465	0	0.705
6m	A	N06AA	Non-selective monoamine reuptake inhibitors [DG:DG01730]	1236	82	2437	103	0.13178	0.183356	0.718711	1.14086	0.796359	1.63438	0.472	0	0.705
6m	A	N06AB	Selective serotonin reuptake inhibitors	1200	118	2339	201	0.0203547	0.148888	0.136712	1.02056	0.762195	1.36651	0.891	0	0.946
6m	A	N06AX	Other antidepressants	1234	84	2454	86	0.433609	0.188723	2.29759	1.54282	1.06567	2.2336	0.0216	-1	0.0921
6m	A	N06DA	Anticholinesterases	1289	29	2506	34	0.102255	0.317623	0.321939	1.10767	0.594241	2.06469	0.748	0	0.838
6m	A	N06DX	Other anti-dementia drugs	1287	31	2507	33	0.239825	0.325437	0.736931	1.27103	0.671513	2.40577	0.461	0	0.705
6m	A	N07CA	Antivertigo preparations	1301	17	2519	21	-0.408006	0.435489	-0.936892	0.664975	0.283139	1.56175	0.349	0	0.591
6m	A	P01AB	Nitroimidazole derivatives	1306	12	2530	10	0.914966	0.460732	1.98589	2.49669	1.01173	6.16119	0.0471	-1	0.174
6m	A	P01BA	Aminoquinolines	1308	10	2532	8	0.606677	0.547977	1.10712	1.83433	0.626455	5.37109	0.268	0	0.506
6m	A	P01BC	Methanolquinolines	1292	26	2523	17	0.671741	0.409751	1.63939	1.95764	0.876682	4.37144	0.101	0	0.269
6m	A	R01AD	Corticosteroids	1260	58	2436	104	-0.188809	0.192657	-0.980027	0.827945	0.567492	1.20793	0.327	0	0.573
6m	A	R03AC	Selective beta-2-adrenoreceptor agonists	1163	155	2361	179	0.27802	0.151396	1.83638	1.32051	0.981372	1.77685	0.0664	0	0.21
6m	A	R03AK	Adrenergics in combination with corticosteroids or other drugs, excl. anticholinergics	1229	89	2420	120	0.0728879	0.192078	0.379469	1.07561	0.738084	1.56749	0.704	0	0.807
6m	A	R03AL	Adrenergics in combination with anticholinergics incl. triple combinations with corticosteroids	1293	25	2529	11	0.904986	0.465598	1.94371	2.4719	0.992174	6.15847	0.052	0	0.18
6m	A	R03BA	Glucocorticoids	1287	31	2458	82	-0.612637	0.254633	-2.40596	0.54192	0.328944	0.892787	0.0162	1	0.0753
6m	A	R03BB	Anticholinergics	1285	33	2509	31	0.0485558	0.370175	0.13117	1.04975	0.508036	2.1691	0.896	0	0.946
6m	A	R03DA	Xanthines	1313	5	2535	5	-0.831007	0.923157	-0.90018	0.43561	0.0712948	2.66158	0.368	0	0.596
6m	A	R03DC	Leukotriene receptor antagonists	1307	11	2520	20	-0.280549	0.471809	-0.594624	0.755369	0.299522	1.90498	0.552	0	0.745
6m	A	R05CB	Mucolytics	1286	32	2522	18	0.532037	0.383006	1.38911	1.7024	0.80342	3.60727	0.165	0	0.367
6m	A	R05DA	Opium alkaloids and derivatives	1265	53	2491	49	0.815773	0.233271	3.49711	2.26092	1.43108	3.57198	0.000476	-1	0.00364
6m	A	R06AE	Piperazine derivatives	1236	82	2487	53	0.78664	0.207561	3.78992	2.196	1.46184	3.29887	0.000153	-1	0.00168
6m	A	R06AX	Other antihistamines for systemic use	1280	38	2482	58	-0.129799	0.244548	-0.53077	0.878272	0.543755	1.41858	0.596	0	0.747
6m	A	S01AA	Antibiotics	1295	23	2523	17	0.420583	0.387823	1.08447	1.52285	0.711929	3.25744	0.278	0	0.511
6m	A	S01EC	Carbonic anhydrase inhibitors	1308	10	2530	10	-0.0424566	0.544596	-0.0779598	0.958432	0.329499	2.78785	0.938	0	0.947
6m	A	S01ED	Beta blocking agents	1309	9	2521	19	-0.65322	0.493616	-1.32334	0.520368	0.197702	1.36965	0.186	0	0.39
6m	A	S01EE	Prostaglandin analogues	1298	20	2505	35	-0.689225	0.350195	-1.96812	0.501965	0.252634	0.997365	0.0491	1	0.174
6m	A	S01GX	Other antiallergics	1308	10	2529	11	0.0384899	0.52096	0.0738827	1.03924	0.374226	2.88601	0.941	0	0.947
6m	A	S01XA	Other ophthalmologicals	1248	70	2464	76	0.115409	0.202332	0.570395	1.12233	0.754817	1.66879	0.568	0	0.747
6m	A	V07AY	Other non-therapeutic auxiliary products	1256	62	2498	42	0.392732	0.272552	1.44094	1.48102	0.867943	2.52715	0.15	0	0.344
6m	B	A02BA	H2-receptor antagonists [DG:DG01481]	162	8	3645	43	1.0397	0.509391	2.04107	2.82837	1.04185	7.67836	0.0413	-1	0.119
6m	B	A02BC	Proton pump inhibitors [DG:DG01646]	107	63	2763	925	0.264324	0.207987	1.27087	1.30255	0.866362	1.95835	0.204	0	0.326
6m	B	A02BX	Other drugs for peptic ulcer and gastro-oesophageal reflux disease (GORD)	161	9	3594	94	0.481327	0.424109	1.13491	1.61822	0.704565	3.71667	0.257	0	0.381
6m	B	A03BB	Belladonna alkaloids, semisynthetic, quaternary ammonium compounds	152	18	3653	35	2.19173	0.386928	5.66445	8.9507	4.19179	19.1124	1.58e-08	-1	4.37e-07
6m	B	A03FA	Propulsives [DG:DG01763]	162	8	3668	20	1.89569	0.574337	3.30066	6.65716	2.15903	20.5268	0.000973	-1	0.00577
6m	B	A06AA	Softeners, emollients	158	12	3611	77	0.707573	0.390153	1.81358	2.02906	0.944258	4.36013	0.0698	0	0.152
6m	B	A06AB	Contact laxatives	136	34	3575	113	1.48043	0.280773	5.27269	4.39483	2.53438	7.62101	1.42e-07	-1	2.95e-06
6m	B	A06AD	Osmotically acting laxatives	131	39	3474	214	0.967676	0.24582	3.93653	2.63182	1.62535	4.26152	8.41e-05	-1	0.000776
6m	B	A07AA	Antibiotics	165	5	3663	25	0.637249	0.695796	0.915856	1.89127	0.483397	7.39951	0.36	0	0.498
6m	B	A07DA	Antipropulsives	164	6	3641	47	0.940252	0.588813	1.59686	2.56063	0.807215	8.12276	0.11	0	0.223
6m	B	A10AB	Insulins and analogues for injection, fast-acting	153	17	3578	110	1.03899	0.464753	2.23557	2.82635	1.13632	7.0299	0.0254	-1	0.0787
6m	B	A10AD	Insulins and analogues for injection, intermediate- or long-acting combined with fast-acting	165	5	3656	32	0.228861	0.813766	0.281236	1.25717	0.254973	6.19856	0.779	0	0.898
6m	B	A10AE	Insulins and analogues for injection, long-acting	163	7	3664	24	1.13841	0.767794	1.4827	3.1218	0.692869	14.0656	0.138	0	0.249
6m	B	A10BA	Biguanides [DG:DG01684]	154	16	3433	255	-0.296172	0.430176	-0.688489	0.74366	0.319957	1.72845	0.491	0	0.658
6m	B	A10BB	Sulfonylureas	164	6	3610	78	0.0742669	0.668043	0.111171	1.07709	0.290693	3.99092	0.912	0	0.946
6m	B	A10BH	Dipeptidyl peptidase 4 (DPP-4) inhibitors [DG:DG01601]	163	7	3618	70	-0.0837036	0.661315	-0.126571	0.919704	0.251511	3.36309	0.899	0	0.945
6m	B	A11CC	Vitamin D and analogues	161	9	3613	75	0.663709	0.4681	1.41788	1.94198	0.775661	4.86204	0.156	0	0.265
6m	B	A11DA	Vitamin B1, plain	161	9	3662	26	1.55694	0.528497	2.94597	4.74426	1.68333	13.3711	0.00324	-1	0.0158
6m	B	A12AX	Calcium, combinations with vitamin D and/or other drugs	144	26	3421	267	0.373279	0.290411	1.28535	1.45249	0.821933	2.56678	0.199	0	0.323
6m	B	B01AC	Platelet aggregation inhibitors excl. heparin	131	39	3290	398	0.0332039	0.263355	0.12608	1.03376	0.616853	1.73244	0.9	0	0.945
6m	B	B01AF	Direct factor Xa inhibitors	145	25	3502	186	0.538897	0.295104	1.82613	1.71412	0.961098	3.05712	0.0679	0	0.152
6m	B	B03AA	Iron bivalent, oral preparations	152	18	3595	93	1.10036	0.38213	2.87953	3.00524	1.42071	6.35698	0.00401	-1	0.0185
6m	B	B03BA	Vitamin B12 (cyanocobalamin and analogues)	162	8	3605	83	0.339314	0.475446	0.713677	1.40398	0.552757	3.56607	0.476	0	0.648
6m	B	B03BB	Folic acid and derivatives	151	19	3581	107	0.741475	0.363833	2.03795	2.09903	1.02855	4.28362	0.0416	-1	0.119
6m	B	C01AA	Digitalis glycosides [DG:DG01697]	164	6	3660	28	0.894802	0.583858	1.53257	2.44685	0.77888	7.68679	0.126	0	0.241
6m	B	C01DA	Organic nitrates	161	9	3572	116	0.157412	0.443181	0.355187	1.17048	0.490917	2.79074	0.723	0	0.857
6m	B	C02CA	Alpha-adrenoreceptor antagonists	164	6	3619	69	-0.146757	0.584083	-0.251261	0.863504	0.274748	2.7139	0.802	0	0.899
6m	B	C03AA	Thiazides, plain [DG:DG01749]	162	8	3586	102	0.0162726	0.458311	0.0355056	1.01641	0.413836	2.49635	0.972	0	0.972
6m	B	C03BA	Sulfonamides, plain	159	11	3625	63	0.698685	0.463502	1.5074	2.01111	0.810544	4.98992	0.132	0	0.243
6m	B	C03CA	Sulfonamides, plain	145	25	3534	154	0.496224	0.325623	1.52392	1.64251	0.867459	3.11004	0.128	0	0.241
6m	B	C07AB	Beta blocking agents, selective	130	40	3330	358	0.575424	0.254848	2.25791	1.77788	1.07872	2.93021	0.024	-1	0.0787
6m	B	C08CA	Dihydropyridine derivatives [DG:DG01928]	135	35	3185	503	-0.0535195	0.255437	-0.209522	0.947887	0.57446	1.56406	0.834	0	0.918
6m	B	C09AA	ACE inhibitors, plain [DG:DG01501]	139	31	3216	472	-0.094076	0.275529	-0.341438	0.910214	0.530321	1.56224	0.733	0	0.857
6m	B	C09CA	Angiotensin II receptor blockers, plain [DG:DG01495]	150	20	3421	267	0.0590444	0.315107	0.187378	1.06082	0.571923	1.96765	0.851	0	0.918
6m	B	C10AA	HMG CoA reductase inhibitors [DG:DG01660]	95	75	2656	1032	-0.071657	0.205265	-0.349095	0.93085	0.622447	1.39206	0.727	0	0.857
6m	B	D01AC	Imidazole and triazole derivatives	153	17	3590	98	0.671083	0.384668	1.74458	1.95636	0.920268	4.15892	0.0811	0	0.173
6m	B	D01AX		163	7	3640	48	0.891693	0.489348	1.82221	2.43926	0.934527	6.36682	0.0685	0	0.152
6m	B	D02AE	Carbamide products	165	5	3675	13	1.69857	0.760661	2.23302	5.46613	1.23027	24.2862	0.0256	-1	0.0787
6m	B	D02AX	Other emollients and protectives	138	32	3493	195	0.926252	0.268203	3.45355	2.52503	1.49245	4.27201	0.000559	-1	0.00387
6m	B	D07AC	Corticosteroids, potent (group III)	161	9	3615	73	0.62391	0.44937	1.38841	1.86621	0.773277	4.50387	0.165	0	0.274
6m	B	G04BD	Urinary antispasmodics	161	9	3601	87	0.476233	0.43341	1.0988	1.61	0.688319	3.76584	0.272	0	0.396
6m	B	G04BE	Drugs used in erectile dysfunction	162	8	3586	102	0.710756	0.448008	1.58648	2.03553	0.84569	4.8994	0.113	0	0.223
6m	B	G04CA	Alpha-adrenoreceptor antagonists	165	5	3679	9	1.90662	0.695866	2.73993	6.73032	1.71999	26.3357	0.00617	-1	0.027
6m	B	G04CB	Testosterone-5-alpha reductase inhibitors	164	6	3629	59	-0.777389	0.630145	-1.23367	0.459605	0.133609	1.58101	0.217	0	0.327
6m	B	H02AB	Glucocorticoids	144	26	3526	162	1.2396	0.30759	4.03004	3.45424	1.88994	6.31329	5.69e-05	-1	0.000675
6m	B	H03AA	Thyroid hormones	151	19	3456	232	0.547295	0.339604	1.61157	1.72857	0.888228	3.36395	0.107	0	0.222
6m	B	J01AA	Tetracyclines [DG:DG01197]	148	22	3525	163	1.0634	0.301983	3.52139	2.8962	1.60214	5.2355	0.000434	-1	0.0036
6m	B	J01CA	Penicillins with extended spectrum [DG:DG01780]	136	34	3470	218	1.16345	0.255697	4.5501	3.20095	1.93892	5.28443	5.53e-06	-1	9.18e-05
6m	B	J01CF	Beta-lactamase resistant penicillins [DG:DG01779]	149	21	3579	109	0.900893	0.343311	2.62413	2.4618	1.25584	4.82583	0.00872	-1	0.0329
6m	B	J01CR	Combinations of penicillins, incl. beta-lactamase inhibitors	160	10	3634	54	0.946631	0.482169	1.96328	2.57701	1.0013	6.63238	0.0497	-1	0.129
6m	B	J01EA	Trimethoprim and derivatives [DG:DG01581]	163	7	3647	41	0.328584	0.612905	0.53611	1.389	0.417668	4.61927	0.592	0	0.767
6m	B	J01FA	Macrolides [DG:DG01551]	159	11	3616	72	1.1466	0.432663	2.65009	3.14746	1.3476	7.35123	0.00808	-1	0.0329
6m	B	J01XE	Nitrofuran derivatives	150	20	3549	139	0.835867	0.316903	2.63761	2.30681	1.23931	4.29384	0.00838	-1	0.0329
6m	B	M01AE	Propionic acid derivatives	163	7	3568	120	0.573228	0.460226	1.24553	1.77398	0.719583	4.37339	0.213	0	0.327
6m	B	M02AA	Antiinflammatory preparations, non-steroids for topical use	153	17	3530	158	0.33293	0.338476	0.983616	1.39505	0.718435	2.70889	0.325	0	0.458
6m	B	M04AA	Preparations inhibiting uric acid production	161	9	3575	113	-0.275949	0.540381	-0.510656	0.758852	0.26305	2.18915	0.61	0	0.767
6m	B	M05BA	Bisphosphonates [DG:DG01600]	153	17	3600	88	1.38782	0.347777	3.99054	4.0061	2.02581	7.92217	6.72e-05	-1	0.000697
6m	B	N02AA	Natural opium alkaloids	136	34	3607	81	1.9766	0.285723	6.9179	7.21818	4.12233	12.639	5.35e-12	-1	2.22e-10
6m	B	N02AE	Oripavine derivatives	159	11	3658	30	1.1545	0.515642	2.23896	3.17245	1.15436	8.71863	0.0252	-1	0.0787
6m	B	N02AJ	Opioids in combination with non-opioid analgesics	151	19	3485	203	0.480069	0.332502	1.44381	1.61619	0.842123	3.10175	0.149	0	0.262
6m	B	N02AX	Other opioids	165	5	3623	65	0.353626	0.613256	0.576637	1.42422	0.427965	4.73967	0.564	0	0.743
6m	B	N02BE	Anilides	96	74	3154	534	0.89681	0.207925	4.31315	2.45177	1.63094	3.68571	1.65e-05	-1	0.000228
6m	B	N03AX	Other antiepileptics	139	31	3504	184	1.01928	0.294008	3.46685	2.7712	1.55715	4.93182	0.000532	-1	0.00387
6m	B	N04BA	Dopa and dopa derivatives	163	7	3657	31	0.987558	0.502475	1.96539	2.68467	1.00242	7.19009	0.0494	-1	0.129
6m	B	N05AX	Other antipsychotics	162	8	3664	24	1.78693	0.52417	3.40907	5.97111	2.13668	16.6867	0.000659	-1	0.0042
6m	B	N05BA	Benzodiazepine derivatives [DG:DG01914]	155	15	3611	77	1.13917	0.367533	3.09951	3.12418	1.51982	6.42215	0.00195	-1	0.0101
6m	B	N05CD	Benzodiazepine derivatives	145	25	3663	25	2.6501	0.376001	7.04813	14.1555	6.77284	29.5855	2.14e-12	-1	1.78e-10
6m	B	N06AA	Non-selective monoamine reuptake inhibitors [DG:DG01730]	159	11	3514	174	0.205056	0.415754	0.493215	1.22759	0.543316	2.77369	0.622	0	0.77
6m	B	N06AB	Selective serotonin reuptake inhibitors	150	20	3389	299	0.415274	0.334377	1.24193	1.51479	0.786392	2.91785	0.214	0	0.327
6m	B	N06AX	Other antidepressants	155	15	3533	155	0.647624	0.34509	1.87668	1.91099	0.971461	3.75918	0.0606	0	0.148
6m	B	N06DA	Anticholinesterases	160	10	3635	53	0.616388	0.429518	1.43507	1.85223	0.797943	4.29948	0.151	0	0.262
6m	B	N06DX	Other anti-dementia drugs	157	13	3637	51	0.863812	0.428697	2.01497	2.37219	1.02359	5.49758	0.044	-1	0.122
6m	B	R01AD	Corticosteroids	164	6	3532	156	-0.209789	0.506025	-0.414582	0.810756	0.300625	2.18653	0.678	0	0.828
6m	B	R03AC	Selective beta-2-adrenoreceptor agonists	149	21	3375	313	0.098784	0.372736	0.265024	1.10383	0.53153	2.29232	0.791	0	0.899
6m	B	R03AK	Adrenergics in combination with corticosteroids or other drugs, excl. anticholinergics	160	10	3489	199	-0.101644	0.513902	-0.197789	0.903351	0.329826	2.47416	0.843	0	0.918
6m	B	R03AL	Adrenergics in combination with anticholinergics incl. triple combinations with corticosteroids	164	6	3658	30	0.738629	0.680794	1.08495	2.09306	0.550943	7.95167	0.278	0	0.398
6m	B	R05CB	Mucolytics	162	8	3646	42	1.07047	0.557528	1.92003	2.91675	0.977642	8.70198	0.0549	0	0.138
6m	B	R05DA	Opium alkaloids and derivatives	162	8	3594	94	0.263017	0.505022	0.520803	1.30085	0.483298	3.50137	0.603	0	0.767
6m	B	R06AE	Piperazine derivatives	154	16	3569	119	0.868473	0.355728	2.4414	2.38327	1.18654	4.78701	0.0147	-1	0.053
6m	B	R06AX	Other antihistamines for systemic use	165	5	3597	91	0.0524529	0.646942	0.0810782	1.05385	0.296434	3.74656	0.935	0	0.946
6m	B	S01AA	Antibiotics	160	10	3658	30	1.62513	0.5029	3.23152	5.07909	1.89488	13.6142	0.00124	-1	0.00687
6m	B	S01XA	Other ophthalmologicals	159	11	3553	135	0.0356687	0.435083	0.0819812	1.03631	0.441601	2.43193	0.935	0	0.946
6m	B	V07AY	Other non-therapeutic auxiliary products	156	14	3598	90	0.857812	0.472295	1.81626	2.35799	0.93411	5.95234	0.0694	0	0.152
6m	C	A01AB	Antiinfectives and antiseptics for local oral treatment	1286	32	390749	2393	1.21785	0.194515	6.26096	3.37992	2.30852	4.94856	3.83e-10	-1	2.34e-09
6m	C	A01AD	Other agents for local oral treatment	1306	12	392584	558	1.54898	0.336297	4.60599	4.70667	2.43476	9.09854	4.11e-06	-1	1.43e-05
6m	C	A02BA	H2-receptor antagonists [DG:DG01481]	1283	35	390176	2966	0.859158	0.207604	4.13844	2.36117	1.57186	3.54684	3.5e-05	-1	0.000102
6m	C	A02BC	Proton pump inhibitors [DG:DG01646]	925	393	321442	71700	0.278446	0.072412	3.8453	1.32107	1.14628	1.52253	0.00012	-1	0.000304
6m	C	A02BX	Other drugs for peptic ulcer and gastro-oesophageal reflux disease (GORD)	1271	47	388391	4751	0.734511	0.178624	4.11205	2.08446	1.46875	2.95828	3.92e-05	-1	0.000112
6m	C	A03AA	Synthetic anticholinergics, esters with tertiary amino group	1305	13	390973	2169	0.322002	0.317104	1.01545	1.37989	0.74118	2.569	0.31	0	0.403
6m	C	A03AX	Other drugs for functional gastrointestinal disorders	1313	5	392272	870	0.0299817	0.56091	0.053452	1.03044	0.34322	3.09364	0.957	0	0.969
6m	C	A03BB	Belladonna alkaloids, semisynthetic, quaternary ammonium compounds	1285	33	391773	1369	1.76489	0.197564	8.93325	5.84091	3.96564	8.60295	4.15e-19	-1	4.9e-18
6m	C	A03FA	Propulsives [DG:DG01763]	1295	23	392314	828	1.84021	0.240775	7.64287	6.29788	3.92867	10.0959	2.13e-14	-1	1.98e-13
6m	C	A04AA	Serotonin (5HT3) antagonists	1313	5	392969	173	2.32825	0.436982	5.32803	10.26	4.35699	24.1606	9.93e-08	-1	4.39e-07
6m	C	A06AA	Softeners, emollients	1251	67	390791	2351	1.74601	0.155368	11.2379	5.73167	4.22699	7.77197	2.69e-29	-1	4.33e-28
6m	C	A06AB	Contact laxatives	1210	108	390079	3063	1.87316	0.129207	14.4974	6.50886	5.0527	8.38469	1.3e-47	-1	5.75e-46
6m	C	A06AC	Bulk-forming laxatives	1312	6	391717	1425	0.113075	0.460452	0.245573	1.11972	0.454118	2.76087	0.806	0	0.875
6m	C	A06AD	Osmotically acting laxatives	1165	153	383979	9163	1.51258	0.100727	15.0166	4.53844	3.72535	5.52899	5.91e-51	-1	3.49e-49
6m	C	A06AG	Enemas	1312	6	393008	134	1.97995	0.539436	3.67041	7.24238	2.516	20.8474	0.000242	-1	0.000604
6m	C	A06AX	Other drugs for constipation	1309	9	392673	469	1.21229	0.437687	2.76976	3.36117	1.42538	7.92594	0.00561	-1	0.0113
6m	C	A07AA	Antibiotics	1297	21	392442	700	1.83108	0.272579	6.7176	6.24062	3.65769	10.6475	1.85e-11	-1	1.49e-10
6m	C	A07DA	Antipropulsives	1285	33	391115	2027	1.14523	0.221443	5.17169	3.14317	2.03646	4.85133	2.32e-07	-1	9.33e-07
6m	C	A07EC	Aminosalicylic acid and similar agents	1302	16	390543	2599	0.418652	0.275899	1.51741	1.51991	0.885058	2.61015	0.129	0	0.189
6m	C	A10AB	Insulins and analogues for injection, fast-acting	1238	80	387223	5919	0.595953	0.176985	3.36724	1.81476	1.28283	2.56726	0.000759	-1	0.00172
6m	C	A10AC	Insulins and analogues for injection, intermediate-acting	1305	13	392389	753	0.417165	0.421282	0.990229	1.51765	0.664624	3.46553	0.322	0	0.416
6m	C	A10AD	Insulins and analogues for injection, intermediate- or long-acting combined with fast-acting	1291	27	391869	1273	0.527726	0.311142	1.69609	1.69507	0.921177	3.11913	0.0899	0	0.138
6m	C	A10AE	Insulins and analogues for injection, long-acting	1296	22	391195	1947	0.132597	0.31553	0.420236	1.14179	0.615185	2.11917	0.674	0	0.746
6m	C	A10BA	Biguanides [DG:DG01684]	1196	122	375684	17458	-0.0799267	0.139889	-0.571357	0.923184	0.701801	1.2144	0.568	0	0.653
6m	C	A10BB	Sulfonylureas	1286	32	388238	4904	-0.174038	0.235379	-0.739396	0.840265	0.529738	1.33282	0.46	0	0.561
6m	C	A10BH	Dipeptidyl peptidase 4 (DPP-4) inhibitors [DG:DG01601]	1283	35	388544	4598	-0.135746	0.23827	-0.569713	0.873065	0.547306	1.39272	0.569	0	0.653
6m	C	A10BJ	Glucagon-like peptide-1 receptor (GLP-1) analogues	1309	9	391729	1413	-0.780061	0.518225	-1.50526	0.458378	0.166	1.26572	0.132	0	0.189
6m	C	A10BK	Sodium-glucose co-transporter 2 (SGLT2) inhibitors	1298	20	390308	2834	-0.0124085	0.273109	-0.0454341	0.987668	0.578282	1.68687	0.964	0	0.969
6m	C	A11CC	Vitamin D and analogues	1272	46	389402	3740	0.782423	0.188376	4.15351	2.18676	1.51166	3.16336	3.28e-05	-1	9.74e-05
6m	C	A11DA	Vitamin B1, plain	1289	29	391982	1160	1.35293	0.240757	5.61947	3.86873	2.41343	6.20156	1.92e-08	-1	9.71e-08
6m	C	A11EX	Vitamin B-complex, other combinations	1313	5	392543	599	0.0638733	0.558518	0.114362	1.06596	0.356719	3.18532	0.909	0	0.952
6m	C	A12AX	Calcium, combinations with vitamin D and/or other drugs	1161	157	368867	24275	0.416723	0.106671	3.90663	1.51698	1.23078	1.86973	9.36e-05	-1	0.000251
6m	C	B01AA	Vitamin K antagonists	1288	30	388932	4210	0.111632	0.251133	0.444512	1.1181	0.683464	1.82914	0.657	0	0.731
6m	C	B01AB	Heparin group	1310	8	392922	220	2.18364	0.406949	5.3659	8.8786	3.99897	19.7124	8.06e-08	-1	3.75e-07
6m	C	B01AC	Platelet aggregation inhibitors excl. heparin	1112	206	360572	32570	0.0851727	0.10529	0.808938	1.08891	0.885864	1.33848	0.419	0	0.515
6m	C	B01AF	Direct factor Xa inhibitors	1201	117	379720	13422	0.620743	0.122652	5.061	1.86031	1.46279	2.36585	4.17e-07	-1	1.54e-06
6m	C	B03AA	Iron bivalent, oral preparations	1240	78	388952	4190	1.02673	0.15764	6.5131	2.79191	2.04983	3.80264	7.37e-11	-1	5.22e-10
6m	C	B03BA	Vitamin B12 (cyanocobalamin and analogues)	1268	50	389070	4072	0.937024	0.172222	5.4408	2.55237	1.82116	3.57717	5.31e-08	-1	2.54e-07
6m	C	B03BB	Folic acid and derivatives	1245	73	387909	5233	0.852083	0.15943	5.34458	2.34453	1.71533	3.20451	9.07e-08	-1	4.12e-07
6m	C	B05CB	Salt solutions	1310	8	392957	185	2.19612	0.429353	5.11495	8.99006	3.87522	20.8559	3.14e-07	-1	1.18e-06
6m	C	B05XA	Electrolyte solutions	1313	5	392788	354	0.0533357	0.736867	0.0723818	1.05478	0.248851	4.47082	0.942	0	0.964
6m	C	C01AA	Digitalis glycosides [DG:DG01697]	1303	15	391313	1829	0.340196	0.33365	1.01962	1.40522	0.730703	2.7024	0.308	0	0.403
6m	C	C01CA	Adrenergic and dopaminergic agents	1312	6	392730	412	1.59627	0.414053	3.85522	4.93458	2.19183	11.1095	0.000116	-1	0.0003
6m	C	C01DA	Organic nitrates	1250	68	387790	5352	0.532705	0.181913	2.92835	1.70353	1.19263	2.4333	0.00341	-1	0.00694
6m	C	C01DX	Other vasodilators used in cardiac diseases	1305	13	391954	1188	-0.0221817	0.416033	-0.0533171	0.978063	0.432751	2.21053	0.958	0	0.969
6m	C	C01EB	Other cardiac preparations	1309	9	392236	906	0.227712	0.43173	0.527442	1.25572	0.538771	2.92674	0.598	0	0.678
6m	C	C02CA	Alpha-adrenoreceptor antagonists	1283	35	386564	6578	-0.232021	0.220921	-1.05024	0.79293	0.514263	1.2226	0.294	0	0.388
6m	C	C03AA	Thiazides, plain [DG:DG01749]	1274	44	381539	11603	-0.148235	0.180689	-0.820389	0.862228	0.605089	1.22864	0.412	0	0.51
6m	C	C03BA	Sulfonamides, plain	1282	36	387003	6139	0.117437	0.207717	0.565369	1.12461	0.748501	1.68971	0.572	0	0.653
6m	C	C03CA	Sulfonamides, plain	1200	118	385186	7956	0.79385	0.138017	5.75182	2.2119	1.68766	2.89898	8.84e-09	-1	4.89e-08
6m	C	C03DA	Aldosterone antagonists	1291	27	390343	2799	0.354787	0.256841	1.38135	1.42588	0.861902	2.35888	0.167	0	0.231
6m	C	C05AX	Other agents for treatment of hemorrhoids and anal fissures for topical use	1305	13	391856	1286	0.609569	0.353533	1.72422	1.83964	0.920033	3.67842	0.0847	0	0.131
6m	C	C07AA	Beta blocking agents, non-selective	1303	15	390241	2901	0.56783	0.25298	2.24457	1.76443	1.07465	2.89696	0.0248	-1	0.0448
6m	C	C07AB	Beta blocking agents, selective	1132	186	360608	32534	0.0325511	0.106396	0.305941	1.03309	0.838633	1.27263	0.76	0	0.83
6m	C	C07AG	Alpha and beta blocking agents	1310	8	392698	444	0.873009	0.490631	1.77936	2.3941	0.9152	6.26282	0.0752	0	0.119
6m	C	C08CA	Dihydropyridine derivatives [DG:DG01928]	1103	215	344730	48412	-0.0547376	0.0909693	-0.601715	0.946734	0.792126	1.13152	0.547	0	0.642
6m	C	C08DB	Benzothiazepine derivatives	1307	11	390349	2793	-0.43951	0.380916	-1.15382	0.644352	0.305412	1.35944	0.249	0	0.333
6m	C	C09AA	ACE inhibitors, plain [DG:DG01501]	1132	186	347068	46074	-0.291268	0.0986432	-2.95274	0.747316	0.61594	0.906712	0.00315	1	0.00648
6m	C	C09CA	Angiotensin II receptor blockers, plain [DG:DG01495]	1208	110	367332	25810	-0.134371	0.120218	-1.11773	0.874265	0.690738	1.10656	0.264	0	0.351
6m	C	C10AA	HMG CoA reductase inhibitors [DG:DG01660]	895	423	291331	101811	-0.239738	0.0740346	-3.23819	0.786834	0.680557	0.909707	0.0012	1	0.00263
6m	C	C10AB	Fibrates	1309	9	391858	1284	0.0498521	0.428767	0.116268	1.05112	0.453609	2.43567	0.907	0	0.952
6m	C	C10AX	Other lipid modifying agents	1300	18	389960	3182	-0.043323	0.297835	-0.14546	0.957602	0.534154	1.71674	0.884	0	0.937
6m	C	D01AC	Imidazole and triazole derivatives	1259	59	389431	3711	1.09174	0.165373	6.60167	2.97944	2.15461	4.12003	4.07e-11	-1	3.13e-10
6m	C	D01AE	Other antifungals for topical use	1312	6	392435	707	0.794837	0.427483	1.85934	2.21408	0.957896	5.11762	0.063	0	0.104
6m	C	D01AX		1285	33	391324	1818	1.34624	0.204405	6.58612	3.84293	2.57438	5.73658	4.52e-11	-1	3.33e-10
6m	C	D01BA	Antifungals for systemic use	1312	6	392691	451	1.41645	0.414235	3.41944	4.12246	1.83045	9.28441	0.000628	-1	0.00144
6m	C	D02AC	Soft paraffin and fat products	1298	20	389978	3164	0.186016	0.282698	0.658005	1.20444	0.692074	2.09613	0.511	0	0.611
6m	C	D02AE	Carbamide products	1308	10	392351	791	0.938339	0.374868	2.50312	2.55573	1.22582	5.3285	0.0123	-1	0.0234
6m	C	D02AX	Other emollients and protectives	1197	121	383910	9232	0.951614	0.118501	8.03047	2.58989	2.05311	3.267	9.74e-16	-1	9.58e-15
6m	C	D05AX	Other antipsoriatics for topical use	1310	8	391904	1238	0.58408	0.363518	1.60674	1.79334	0.879498	3.65671	0.108	0	0.165
6m	C	D06AX	Other antibiotics for topical use	1308	10	392320	822	0.972825	0.376165	2.58616	2.64541	1.26561	5.5295	0.00971	-1	0.0187
6m	C	D07AA	Corticosteroids, weak (group I)	1303	15	391847	1295	1.11045	0.288261	3.85223	3.03572	1.72541	5.34109	0.000117	-1	0.0003
6m	C	D07AB	Corticosteroids, moderately potent (group II)	1300	18	391878	1264	1.36387	0.257927	5.2878	3.91129	2.35924	6.48438	1.24e-07	-1	5.1e-07
6m	C	D07AC	Corticosteroids, potent (group III)	1279	39	389167	3975	0.814197	0.191274	4.2567	2.25736	1.55163	3.28408	2.08e-05	-1	6.57e-05
6m	C	D07AD	Corticosteroids, very potent (group IV)	1305	13	391767	1375	1.01944	0.294358	3.46326	2.77164	1.5566	4.9351	0.000534	-1	0.00124
6m	C	D07CA	Corticosteroids, weak, combinations with antibiotics	1309	9	392660	482	1.54388	0.375842	4.10778	4.68271	2.24171	9.78171	4e-05	-1	0.000112
6m	C	D07CC	Corticosteroids, potent, combinations with antibiotics	1303	15	392104	1038	0.796734	0.359788	2.21445	2.21828	1.09588	4.49024	0.0268	-1	0.0479
6m	C	D09AA	Medicated dressings with antiinfectives	1312	6	392977	165	2.06798	0.468747	4.41172	7.90885	3.15583	19.8204	1.03e-05	-1	3.44e-05
6m	C	D11AC	Medicated shampoos	1312	6	392528	614	0.0576747	0.648476	0.0889389	1.05937	0.297209	3.77601	0.929	0	0.962
6m	C	G01AF	Imidazole derivatives	1304	14	392482	660	1.43482	0.332639	4.31343	4.19888	2.18771	8.05894	1.61e-05	-1	5.18e-05
6m	C	G03BA	3-oxoandrosten (4) derivatives	1312	6	392408	734	0.398631	0.475815	0.837785	1.48978	0.586283	3.78564	0.402	0	0.505
6m	C	G03CA	Natural and semisynthetic estrogens, plain	1284	34	383423	9719	0.278683	0.182903	1.52367	1.32139	0.9233	1.89112	0.128	0	0.189
6m	C	G04BD	Urinary antispasmodics	1280	38	385895	7247	0.0951536	0.194382	0.489518	1.09983	0.75139	1.60984	0.625	0	0.704
6m	C	G04BE	Drugs used in erectile dysfunction	1273	45	385919	7223	0.34266	0.166822	2.05405	1.40869	1.01582	1.95351	0.04	-1	0.0674
6m	C	G04CA	Alpha-adrenoreceptor antagonists	1311	7	392189	953	0.385308	0.439525	0.876646	1.47007	0.621172	3.47906	0.381	0	0.482
6m	C	G04CB	Testosterone-5-alpha reductase inhibitors	1286	32	386614	6528	-0.150134	0.231342	-0.648973	0.860592	0.546863	1.3543	0.516	0	0.612
6m	C	H02AA	Mineralocorticoids	1312	6	392771	371	1.00072	0.554219	1.80564	2.72024	0.918025	8.06049	0.071	0	0.114
6m	C	H02AB	Glucocorticoids	1196	122	386491	6651	1.57099	0.1145	13.7204	4.81142	3.84424	6.02194	7.84e-43	-1	2.78e-41
6m	C	H03AA	Thyroid hormones	1237	81	367529	25613	-0.196713	0.130769	-1.50428	0.821426	0.635708	1.0614	0.133	0	0.189
6m	C	J01AA	Tetracyclines [DG:DG01197]	1198	120	389325	3817	2.12686	0.113012	18.8198	8.38853	6.72185	10.4684	5.64e-79	-1	4.99e-77
6m	C	J01CA	Penicillins with extended spectrum [DG:DG01780]	1161	157	388974	4168	2.45998	0.0963779	25.5243	11.7045	9.68983	14.1381	1.39e-143	-1	2.46e-141
6m	C	J01CE	Beta-lactamase sensitive penicillins [DG:DG01778]	1310	8	392188	954	0.645554	0.411846	1.56746	1.90704	0.850738	4.2749	0.117	0	0.176
6m	C	J01CF	Beta-lactamase resistant penicillins [DG:DG01779]	1239	79	389139	4003	1.55565	0.136841	11.3683	4.73817	3.62353	6.1957	6.08e-30	-1	1.08e-28
6m	C	J01CR	Combinations of penicillins, incl. beta-lactamase inhibitors	1273	45	391685	1457	2.01693	0.179697	11.2241	7.51521	5.28424	10.6881	3.14e-29	-1	4.63e-28
6m	C	J01DB	First-generation cephalosporins [DG:DG01774]	1303	15	392173	969	1.19346	0.332066	3.59403	3.29847	1.7205	6.32366	0.000326	-1	0.00079
6m	C	J01EA	Trimethoprim and derivatives [DG:DG01581]	1288	30	391541	1601	1.53156	0.214646	7.13527	4.62539	3.03697	7.04459	9.68e-13	-1	8.16e-12
6m	C	J01EE	Combinations of sulfonamides and trimethoprim, incl. derivatives	1312	6	392930	212	1.73441	0.494413	3.50801	5.66558	2.1498	14.9311	0.000452	-1	0.00107
6m	C	J01FA	Macrolides [DG:DG01551]	1265	53	390713	2429	1.7226	0.161839	10.6439	5.59905	4.07714	7.68904	1.88e-26	-1	2.56e-25
6m	C	J01FF	Lincosamides [DG:DG01578]	1313	5	393018	124	1.50975	0.709563	2.12772	4.52561	1.1264	18.1828	0.0334	-1	0.0574
6m	C	J01MA	Fluoroquinolones [DG:DG01549]	1304	14	392374	768	1.34846	0.324774	4.15199	3.85149	2.03788	7.2791	3.3e-05	-1	9.74e-05
6m	C	J01XE	Nitrofuran derivatives	1234	84	387245	5897	1.46566	0.126445	11.5914	4.33042	3.37987	5.5483	4.61e-31	-1	1.02e-29
6m	C	J02AC	Triazole derivatives	1306	12	392511	631	1.64312	0.3208	5.12196	5.17129	2.75761	9.69762	3.03e-07	-1	1.17e-06
6m	C	J05AB	Nucleosides and nucleotides excl. reverse transcriptase inhibitors [DG:DG02840]	1303	15	391838	1304	1.22929	0.280879	4.37659	3.41881	1.97147	5.92871	1.21e-05	-1	3.97e-05
6m	C	L01BC	Pyrimidine analogues	1312	6	392598	544	1.61912	0.387525	4.17811	5.04866	2.36218	10.7904	2.94e-05	-1	8.97e-05
6m	C	L02AE	Gonadotropin releasing hormone analogues	1307	11	392154	988	0.706289	0.40658	1.73715	2.02646	0.913387	4.49594	0.0824	0	0.129
6m	C	L02BG	Aromatase inhibitors [DG:DG01596]	1309	9	390266	2876	0.120347	0.352864	0.341059	1.12789	0.564816	2.2523	0.733	0	0.806
6m	C	L04AA	Selective immunosuppressants	1312	6	392699	443	1.06449	0.470756	2.26124	2.89937	1.15238	7.29478	0.0237	-1	0.0432
6m	C	L04AX	Other immunosuppressants	1305	13	389875	3267	-0.0641135	0.32028	-0.20018	0.937899	0.500648	1.75703	0.841	0	0.908
6m	C	M01AB	Acetic acid derivatives and related substances	1311	7	392361	781	0.905409	0.394026	2.29784	2.47294	1.1424	5.35317	0.0216	-1	0.0398
6m	C	M01AE	Propionic acid derivatives	1271	47	384683	8459	0.423095	0.158145	2.67535	1.52668	1.11978	2.08143	0.00747	-1	0.0147
6m	C	M01AH	Coxibs	1312	6	392365	777	0.779305	0.426955	1.82526	2.17996	0.944109	5.03354	0.068	0	0.111
6m	C	M02AA	Antiinflammatory preparations, non-steroids for topical use	1233	85	385354	7788	0.8138	0.136252	5.97274	2.25647	1.72763	2.94719	2.34e-09	-1	1.38e-08
6m	C	M03BX	Other centrally acting agents	1306	12	392444	698	1.49425	0.298132	5.01203	4.45599	2.48412	7.9931	5.39e-07	-1	1.95e-06
6m	C	M04AA	Preparations inhibiting uric acid production	1265	53	385659	7483	-0.0333611	0.191412	-0.17429	0.967189	0.664631	1.40748	0.862	0	0.925
6m	C	M04AC	Preparations with no effect on uric acid metabolism	1307	11	392329	813	0.719913	0.398901	1.80474	2.05425	0.939958	4.48952	0.0711	0	0.114
6m	C	M05BA	Bisphosphonates [DG:DG01600]	1262	56	383579	9563	0.533396	0.160922	3.31464	1.70471	1.24358	2.33684	0.000918	-1	0.00203
6m	C	N01BB	Amides	1304	14	392419	723	1.5644	0.295476	5.2945	4.77979	2.67854	8.52943	1.19e-07	-1	5.01e-07
6m	C	N01BX	Other local anesthetics	1313	5	392804	338	0.50946	0.694513	0.733549	1.66439	0.426661	6.49274	0.463	0	0.561
6m	C	N02AA	Natural opium alkaloids	1230	88	389760	3382	1.74654	0.135163	12.9217	5.73472	4.40008	7.47418	3.46e-38	-1	1.02e-36
6m	C	N02AB	Phenylpiperidine derivatives	1308	10	392695	447	1.31036	0.389737	3.36217	3.70752	1.72718	7.95846	0.000773	-1	0.00173
6m	C	N02AE	Oripavine derivatives	1294	24	391776	1366	0.878549	0.280208	3.13535	2.40741	1.39007	4.1693	0.00172	-1	0.00366
6m	C	N02AJ	Opioids in combination with non-opioid analgesics	1217	101	381011	12131	0.560832	0.122876	4.5642	1.75213	1.37712	2.22925	5.02e-06	-1	1.71e-05
6m	C	N02AX	Other opioids	1282	36	388889	4253	0.207691	0.22163	0.937105	1.23083	0.797162	1.90043	0.349	0	0.447
6m	C	N02BE	Anilides	1004	314	364531	28611	0.945662	0.0821071	11.5174	2.57452	2.19182	3.02403	1.09e-30	-1	2.14e-29
6m	C	N02BG	Other analgesics and antipyretics	1312	6	392868	274	1.37817	0.498641	2.76384	3.96761	1.49308	10.5433	0.00571	-1	0.0114
6m	C	N02CC	Selective serotonin (5HT1) agonists [DG:DG01943]	1311	7	390569	2573	-0.00694004	0.369662	-0.018774	0.993084	0.481203	2.04948	0.985	0	0.985
6m	C	N03AB	Hydantoin derivatives	1313	5	392753	389	0.956149	0.536899	1.78087	2.60166	0.908322	7.45179	0.0749	0	0.119
6m	C	N03AF	Carboxamide derivatives	1307	11	391953	1189	0.571499	0.370094	1.5442	1.77092	0.857381	3.65784	0.122	0	0.182
6m	C	N03AG	Fatty acid derivatives	1309	9	392133	1009	-0.0462379	0.48688	-0.0949677	0.954815	0.367692	2.47944	0.924	0	0.962
6m	C	N03AX	Other antiepileptics	1186	132	381073	12069	0.695082	0.117347	5.9233	2.00387	1.59215	2.52207	3.16e-09	-1	1.8e-08
6m	C	N04BA	Dopa and dopa derivatives	1294	24	391095	2047	1.14707	0.230683	4.97251	3.14896	2.00359	4.9491	6.61e-07	-1	2.34e-06
6m	C	N04BB	Adamantane derivatives	1313	5	392965	177	1.72696	0.570207	3.02865	5.62352	1.83927	17.1938	0.00246	-1	0.00518
6m	C	N04BC	Dopamine agonists	1303	15	391805	1337	0.829015	0.320477	2.58682	2.29106	1.22249	4.29367	0.00969	-1	0.0187
6m	C	N04BD	Monoamine oxidase B inhibitors	1312	6	392691	451	1.5149	0.420036	3.60659	4.54895	1.99698	10.3621	0.00031	-1	0.000763
6m	C	N05AB	Phenothiazines with piperazine structure	1295	23	391541	1601	1.41291	0.225417	6.26798	4.10788	2.64084	6.38988	3.66e-10	-1	2.31e-09
6m	C	N05AD	Butyrophenone derivatives [DG:DG01940]	1310	8	393036	106	2.60219	0.454077	5.73072	13.4933	5.54121	32.8572	1e-08	-1	5.36e-08
6m	C	N05AH	Diazepines, oxazepines and thiazepines	1308	10	391863	1279	0.302305	0.367831	0.821858	1.35297	0.657946	2.7822	0.411	0	0.51
6m	C	N05AX	Other antipsychotics	1298	20	392498	644	1.55215	0.27319	5.68158	4.72163	2.76408	8.06552	1.34e-08	-1	6.98e-08
6m	C	N05BA	Benzodiazepine derivatives [DG:DG01914]	1272	46	390891	2251	1.66001	0.167988	9.88169	5.25934	3.78389	7.3101	5.03e-23	-1	6.36e-22
6m	C	N05CD	Benzodiazepine derivatives	1285	33	392415	727	2.46549	0.202529	12.1735	11.7693	7.91327	17.5042	4.36e-34	-1	1.1e-32
6m	C	N05CF	Benzodiazepine related drugs	1288	30	390209	2933	0.882877	0.209764	4.20891	2.41784	1.60279	3.64737	2.57e-05	-1	7.98e-05
6m	C	N05CH	Melatonin receptor agonists	1313	5	392822	320	1.08494	0.517637	2.09594	2.95925	1.07292	8.162	0.0361	-1	0.0614
6m	C	N06AA	Non-selective monoamine reuptake inhibitors [DG:DG01730]	1236	82	379961	13181	0.32017	0.135634	2.36055	1.37736	1.05584	1.7968	0.0182	-1	0.0344
6m	C	N06AB	Selective serotonin reuptake inhibitors	1200	118	372620	20522	0.255426	0.118322	2.15874	1.29101	1.0238	1.62797	0.0309	-1	0.0541
6m	C	N06AX	Other antidepressants	1234	84	385054	8088	0.77217	0.137559	5.61339	2.16446	1.65295	2.83426	1.99e-08	-1	9.78e-08
6m	C	N06DA	Anticholinesterases	1289	29	391429	1713	1.22531	0.23914	5.12385	3.40524	2.13104	5.44132	3e-07	-1	1.17e-06
6m	C	N06DX	Other anti-dementia drugs	1287	31	392296	846	2.01047	0.239665	8.38868	7.46685	4.66803	11.9438	4.93e-17	-1	5.13e-16
6m	C	N07CA	Antivertigo preparations	1301	17	391129	2013	0.201487	0.342019	0.589109	1.22322	0.625715	2.39129	0.556	0	0.647
6m	C	P01AB	Nitroimidazole derivatives	1306	12	392681	461	1.99346	0.307196	6.48922	7.3409	4.02034	13.404	8.64e-11	-1	5.88e-10
6m	C	P01BA	Aminoquinolines	1308	10	391813	1329	0.520566	0.369563	1.4086	1.68298	0.815653	3.47259	0.159	0	0.222
6m	C	P01BC	Methanolquinolines	1292	26	390215	2927	0.381784	0.253905	1.50365	1.4649	0.890597	2.40953	0.133	0	0.189
6m	C	R01AD	Corticosteroids	1260	58	381243	11899	0.20262	0.150527	1.34607	1.22461	0.911732	1.64485	0.178	0	0.243
6m	C	R01AX	Other nasal preparations	1313	5	392981	161	2.08574	0.511904	4.07447	8.05055	2.95182	21.9564	4.61e-05	-1	0.000127
6m	C	R03AC	Selective beta-2-adrenoreceptor agonists	1163	155	377701	15441	0.887777	0.117335	7.5662	2.42972	1.93055	3.05796	3.85e-14	-1	3.41e-13
6m	C	R03AK	Adrenergics in combination with corticosteroids or other drugs, excl. anticholinergics	1229	89	379736	13406	0.323281	0.147962	2.18488	1.38165	1.03384	1.84648	0.0289	-1	0.0512
6m	C	R03AL	Adrenergics in combination with anticholinergics incl. triple combinations with corticosteroids	1293	25	390974	2168	0.635701	0.274101	2.31922	1.88834	1.10348	3.23145	0.0204	-1	0.038
6m	C	R03BA	Glucocorticoids	1287	31	386444	6698	0.184257	0.210134	0.876856	1.20233	0.796443	1.81505	0.381	0	0.482
6m	C	R03BB	Anticholinergics	1285	33	388919	4223	0.0424343	0.26035	0.16299	1.04335	0.626352	1.73796	0.871	0	0.929
6m	C	R03DA	Xanthines	1313	5	392713	429	-0.0588118	0.736815	-0.079819	0.942884	0.222474	3.99612	0.936	0	0.964
6m	C	R03DC	Leukotriene receptor antagonists	1307	11	390577	2565	-0.263128	0.37342	-0.704644	0.768643	0.369716	1.59802	0.481	0	0.579
6m	C	R05CB	Mucolytics	1286	32	390617	2525	0.726879	0.244773	2.96961	2.06861	1.28035	3.34219	0.00298	-1	0.00621
6m	C	R05DA	Opium alkaloids and derivatives	1265	53	388233	4909	0.996657	0.157182	6.34078	2.70921	1.9909	3.68669	2.29e-10	-1	1.5e-09
6m	C	R06AB	Substituted alkylamines	1308	10	392582	560	1.31475	0.37431	3.51247	3.72383	1.78803	7.75538	0.000444	-1	0.00106
6m	C	R06AD	Phenothiazine derivatives	1308	10	392619	523	1.2162	0.377769	3.21943	3.37434	1.60928	7.07535	0.00128	-1	0.00277
6m	C	R06AE	Piperazine derivatives	1236	82	387786	5356	1.20902	0.136767	8.83999	3.3502	2.56244	4.38013	9.61e-19	-1	1.06e-17
6m	C	R06AX	Other antihistamines for systemic use	1280	38	386236	6906	0.230665	0.187851	1.22791	1.25944	0.871519	1.82002	0.22	0	0.297
6m	C	S01AA	Antibiotics	1295	23	391960	1182	1.40365	0.26382	5.32049	4.07003	2.4268	6.82593	1.04e-07	-1	4.49e-07
6m	C	S01BA	Corticosteroids, plain	1312	6	392456	686	0.908875	0.427214	2.12744	2.48153	1.07417	5.73279	0.0334	-1	0.0574
6m	C	S01EC	Carbonic anhydrase inhibitors	1308	10	390622	2520	-0.181088	0.388615	-0.465984	0.834362	0.38955	1.78708	0.641	0	0.718
6m	C	S01ED	Beta blocking agents	1309	9	389496	3646	-0.567759	0.402501	-1.41058	0.566794	0.257522	1.24749	0.158	0	0.222
6m	C	S01EE	Prostaglandin analogues	1298	20	387111	6031	-0.429488	0.287056	-1.49618	0.650842	0.370794	1.1424	0.135	0	0.191
6m	C	S01GX	Other antiallergics	1308	10	391767	1375	0.251305	0.389801	0.644701	1.2857	0.59888	2.7602	0.519	0	0.612
6m	C	S01XA	Other ophthalmologicals	1248	70	380151	12991	0.228309	0.144782	1.57692	1.25647	0.946051	1.66876	0.115	0	0.174
6m	C	S02AA	Antiinfectives	1313	5	392761	381	0.819553	0.602916	1.35932	2.26949	0.696182	7.3983	0.174	0	0.239
6m	C	V03AE	Drugs for treatment of hyperkalemia and hyperphosphatemia	1309	9	393041	101	2.20976	0.571222	3.86847	9.1135	2.97481	27.9197	0.00011	-1	0.000291
6m	C	V06DC	Carbohydrates	1312	6	393001	141	1.29596	0.651349	1.98966	3.65451	1.01953	13.0997	0.0466	-1	0.0778
6m	C	V07AY	Other non-therapeutic auxiliary products	1256	62	389076	4066	0.742117	0.184151	4.02994	2.10038	1.46402	3.01333	5.58e-05	-1	0.000152
6m	D	A02BA	H2-receptor antagonists [DG:DG01481]	162	8	390176	2966	1.31755	0.442276	2.97903	3.73428	1.56942	8.88534	0.00289	-1	0.0054
6m	D	A02BC	Proton pump inhibitors [DG:DG01646]	107	63	321442	71700	0.460965	0.195083	2.36293	1.5856	1.08178	2.32407	0.0181	-1	0.0305
6m	D	A02BX	Other drugs for peptic ulcer and gastro-oesophageal reflux disease (GORD)	161	9	388391	4751	1.22336	0.383666	3.1886	3.39859	1.60221	7.20903	0.00143	-1	0.00293
6m	D	A03BB	Belladonna alkaloids, semisynthetic, quaternary ammonium compounds	152	18	391773	1369	3.46886	0.285931	12.1318	32.1	18.3282	56.22	7.27e-34	-1	1.53e-32
6m	D	A03FA	Propulsives [DG:DG01763]	162	8	392314	828	2.97153	0.419628	7.08134	19.5217	8.57686	44.433	1.43e-12	-1	8.01e-12
6m	D	A06AA	Softeners, emollients	158	12	390791	2351	1.89969	0.346635	5.48037	6.68379	3.38818	13.185	4.25e-08	-1	1.55e-07
6m	D	A06AB	Contact laxatives	136	34	390079	3063	2.72223	0.244571	11.1306	15.2142	9.42037	24.5713	8.99e-29	-1	1.51e-27
6m	D	A06AD	Osmotically acting laxatives	131	39	383979	9163	2.00432	0.216555	9.25547	7.42103	4.85435	11.3448	2.14e-20	-1	2.57e-19
6m	D	A07AA	Antibiotics	165	5	392442	700	2.42368	0.588165	4.12076	11.2874	3.56405	35.7471	3.78e-05	-1	0.000102
6m	D	A07DA	Antipropulsives	164	6	391115	2027	1.47002	0.488914	3.00671	4.34933	1.66824	11.3393	0.00264	-1	0.00504
6m	D	A10AB	Insulins and analogues for injection, fast-acting	153	17	387223	5919	1.3311	0.414103	3.2144	3.78519	1.68113	8.52264	0.00131	-1	0.00274
6m	D	A10AD	Insulins and analogues for injection, intermediate- or long-acting combined with fast-acting	165	5	391869	1273	0.73752	0.711633	1.03638	2.09074	0.51827	8.43423	0.3	0	0.376
6m	D	A10AE	Insulins and analogues for injection, long-acting	163	7	391195	1947	0.945332	0.597302	1.58267	2.57367	0.798228	8.29809	0.114	0	0.151
6m	D	A10BA	Biguanides [DG:DG01684]	154	16	375684	17458	-0.231044	0.389806	-0.592715	0.793705	0.369704	1.70398	0.553	0	0.637
6m	D	A10BB	Sulfonylureas	164	6	388238	4904	-0.121724	0.605472	-0.20104	0.885393	0.270244	2.90079	0.841	0	0.861
6m	D	A10BH	Dipeptidyl peptidase 4 (DPP-4) inhibitors [DG:DG01601]	163	7	388544	4598	-0.189087	0.609533	-0.310216	0.827714	0.250636	2.73349	0.756	0	0.804
6m	D	A11CC	Vitamin D and analogues	161	9	389402	3740	1.27001	0.407668	3.1153	3.56088	1.60158	7.9171	0.00184	-1	0.00359
6m	D	A11DA	Vitamin B1, plain	161	9	391982	1160	2.31329	0.415247	5.57087	10.1076	4.47907	22.8091	2.54e-08	-1	9.7e-08
6m	D	A12AX	Calcium, combinations with vitamin D and/or other drugs	144	26	368867	24275	0.62085	0.265369	2.33957	1.86051	1.10598	3.12979	0.0193	-1	0.0312
6m	D	B01AC	Platelet aggregation inhibitors excl. heparin	131	39	360572	32570	0.233694	0.238696	0.979044	1.26326	0.791249	2.01684	0.328	0	0.393
6m	D	B01AF	Direct factor Xa inhibitors	145	25	379720	13422	0.733675	0.26284	2.79134	2.08272	1.24423	3.48627	0.00525	-1	0.00959
6m	D	B03AA	Iron bivalent, oral preparations	152	18	388952	4190	1.44068	0.332934	4.32721	4.22355	2.19929	8.11097	1.51e-05	-1	4.23e-05
6m	D	B03BA	Vitamin B12 (cyanocobalamin and analogues)	162	8	389070	4072	1.12368	0.426019	2.63764	3.07617	1.33469	7.08989	0.00835	-1	0.0143
6m	D	B03BB	Folic acid and derivatives	151	19	387909	5233	1.54286	0.308409	5.00265	4.67795	2.55586	8.56199	5.66e-07	-1	1.83e-06
6m	D	C01AA	Digitalis glycosides [DG:DG01697]	164	6	391313	1829	1.04209	0.487851	2.13609	2.83515	1.08972	7.37626	0.0327	-1	0.0499
6m	D	C01DA	Organic nitrates	161	9	387790	5352	0.643208	0.403661	1.59344	1.90257	0.86247	4.197	0.111	0	0.151
6m	D	C02CA	Alpha-adrenoreceptor antagonists	164	6	386564	6578	-0.337202	0.537179	-0.627727	0.713765	0.249061	2.04552	0.53	0	0.619
6m	D	C03AA	Thiazides, plain [DG:DG01749]	162	8	381539	11603	-0.0964663	0.420711	-0.229293	0.90804	0.398102	2.07117	0.819	0	0.849
6m	D	C03BA	Sulfonamides, plain	159	11	387003	6139	0.711556	0.407569	1.74586	2.03716	0.916433	4.52844	0.0808	0	0.115
6m	D	C03CA	Sulfonamides, plain	145	25	385186	7956	0.914	0.29281	3.12148	2.49428	1.40509	4.42778	0.0018	-1	0.00359
6m	D	C07AB	Beta blocking agents, selective	130	40	360608	32534	0.419952	0.231915	1.8108	1.52189	0.965997	2.39767	0.0702	0	0.102
6m	D	C08CA	Dihydropyridine derivatives [DG:DG01928]	135	35	344730	48412	-0.106766	0.235724	-0.452926	0.898736	0.566217	1.42653	0.651	0	0.72
6m	D	C09AA	ACE inhibitors, plain [DG:DG01501]	139	31	347068	46074	-0.335982	0.254493	-1.3202	0.714636	0.433969	1.17682	0.187	0	0.245
6m	D	C09CA	Angiotensin II receptor blockers, plain [DG:DG01495]	150	20	367332	25810	0.00381161	0.286131	0.0133212	1.00382	0.572927	1.75878	0.989	0	0.999
6m	D	C10AA	HMG CoA reductase inhibitors [DG:DG01660]	95	75	291331	101811	-0.108744	0.191195	-0.568762	0.89696	0.616633	1.30472	0.57	0	0.647
6m	D	D01AC	Imidazole and triazole derivatives	153	17	389431	3711	1.72041	0.337243	5.10138	5.58679	2.8847	10.82	3.37e-07	-1	1.13e-06
6m	D	D01AX		163	7	391324	1818	1.85781	0.405045	4.58667	6.40967	2.89774	14.1779	4.51e-06	-1	1.35e-05
6m	D	D02AE	Carbamide products	165	5	392351	791	2.03253	0.582581	3.48884	7.63341	2.43682	23.9119	0.000485	-1	0.00116
6m	D	D02AX	Other emollients and protectives	138	32	383910	9232	1.73042	0.236417	7.31937	5.64305	3.55038	8.96918	2.5e-13	-1	1.5e-12
6m	D	D07AC	Corticosteroids, potent (group III)	161	9	389167	3975	1.3832	0.400618	3.45267	3.98765	1.81848	8.74431	0.000555	-1	0.00126
6m	D	G04BD	Urinary antispasmodics	161	9	385895	7247	0.630593	0.389784	1.6178	1.87872	0.875139	4.03319	0.106	0	0.146
6m	D	G04BE	Drugs used in erectile dysfunction	162	8	385919	7223	0.696759	0.401106	1.73709	2.00724	0.914483	4.40577	0.0824	0	0.115
6m	D	G04CA	Alpha-adrenoreceptor antagonists	165	5	392189	953	1.78338	0.509768	3.49842	5.94993	2.19076	16.1595	0.000468	-1	0.00116
6m	D	G04CB	Testosterone-5-alpha reductase inhibitors	164	6	386614	6528	-0.591959	0.581832	-1.0174	0.553243	0.176871	1.73051	0.309	0	0.382
6m	D	H02AB	Glucocorticoids	144	26	386491	6651	1.9961	0.263353	7.57956	7.36032	4.39268	12.3329	3.48e-14	-1	2.66e-13
6m	D	H03AA	Thyroid hormones	151	19	367529	25613	0.393603	0.306949	1.28231	1.48231	0.812201	2.7053	0.2	0	0.254
6m	D	J01AA	Tetracyclines [DG:DG01197]	148	22	389325	3817	2.58855	0.271123	9.54751	13.3104	7.82369	22.6451	1.34e-21	-1	1.88e-20
6m	D	J01CA	Penicillins with extended spectrum [DG:DG01780]	136	34	388974	4168	2.99622	0.223651	13.3969	20.0097	12.9083	31.0179	6.44e-41	-1	2.7e-39
6m	D	J01CF	Beta-lactamase resistant penicillins [DG:DG01779]	149	21	389139	4003	2.14323	0.290042	7.38935	8.52689	4.82954	15.0548	1.48e-13	-1	9.56e-13
6m	D	J01CR	Combinations of penicillins, incl. beta-lactamase inhibitors	160	10	391685	1457	2.47867	0.412339	6.01124	11.9254	5.3148	26.7582	1.84e-09	-1	8.59e-09
6m	D	J01EA	Trimethoprim and derivatives [DG:DG01581]	163	7	391541	1601	1.25097	0.564002	2.21803	3.49374	1.15667	10.5529	0.0266	-1	0.0414
6m	D	J01FA	Macrolides [DG:DG01551]	159	11	390713	2429	2.19835	0.380248	5.78136	9.01012	4.27624	18.9845	7.42e-09	-1	3.12e-08
6m	D	J01XE	Nitrofuran derivatives	150	20	387245	5897	2.09277	0.276844	7.55939	8.10733	4.71224	13.9485	4.06e-14	-1	2.84e-13
6m	D	M01AE	Propionic acid derivatives	163	7	384683	8459	0.963033	0.409024	2.35447	2.61963	1.17511	5.83986	0.0186	-1	0.0306
6m	D	M02AA	Antiinflammatory preparations, non-steroids for topical use	153	17	385354	7788	1.12662	0.302048	3.72995	3.08523	1.7068	5.57689	0.000192	-1	0.000489
6m	D	M04AA	Preparations inhibiting uric acid production	161	9	385659	7483	-0.169098	0.492883	-0.343078	0.844426	0.321379	2.21874	0.732	0	0.788
6m	D	M05BA	Bisphosphonates [DG:DG01600]	153	17	383579	9563	1.40574	0.299793	4.68903	4.07854	2.26631	7.33989	2.75e-06	-1	8.56e-06
6m	D	N02AA	Natural opium alkaloids	136	34	389760	3382	3.1213	0.239541	13.0303	22.6759	14.1797	36.2629	8.38e-39	-1	2.35e-37
6m	D	N02AE	Oripavine derivatives	159	11	391776	1366	1.92122	0.421224	4.56105	6.82931	2.99109	15.5928	5.09e-06	-1	1.47e-05
6m	D	N02AJ	Opioids in combination with non-opioid analgesics	151	19	381011	12131	0.819957	0.301709	2.71771	2.2704	1.25686	4.10128	0.00657	-1	0.0117
6m	D	N02AX	Other opioids	165	5	388889	4253	0.465526	0.557621	0.834843	1.59285	0.533981	4.75144	0.404	0	0.478
6m	D	N02BE	Anilides	96	74	364531	28611	1.68825	0.197281	8.55759	5.41001	3.67512	7.96388	1.16e-17	-1	1.22e-16
6m	D	N03AX	Other antiepileptics	139	31	381073	12069	1.32659	0.257182	5.15818	3.76817	2.27623	6.23799	2.5e-07	-1	8.75e-07
6m	D	N04BA	Dopa and dopa derivatives	163	7	391095	2047	1.45213	0.432996	3.35368	4.27222	1.82846	9.98209	0.000798	-1	0.00176
6m	D	N05AD	Butyrophenone derivatives [DG:DG01940]	164	6	393036	106	4.11996	0.535426	7.69473	61.5566	21.5535	175.805	1.42e-14	-1	1.19e-13
6m	D	N05AX	Other antipsychotics	162	8	392498	644	2.77955	0.430415	6.45785	16.1118	6.93065	37.4555	1.06e-10	-1	5.56e-10
6m	D	N05BA	Benzodiazepine derivatives [DG:DG01914]	155	15	390891	2251	2.61309	0.317619	8.22714	13.6412	7.31971	25.4221	1.92e-16	-1	1.79e-15
6m	D	N05CD	Benzodiazepine derivatives	145	25	392415	727	4.1464	0.260948	15.8897	63.2062	37.9	105.41	7.77e-57	-1	6.53e-55
6m	D	N06AA	Non-selective monoamine reuptake inhibitors [DG:DG01730]	159	11	379961	13181	0.38154	0.383294	0.995422	1.46454	0.690937	3.10429	0.32	0	0.39
6m	D	N06AB	Selective serotonin reuptake inhibitors	150	20	372620	20522	0.656141	0.311958	2.1033	1.92734	1.04573	3.55221	0.0354	-1	0.0531
6m	D	N06AX	Other antidepressants	155	15	385054	8088	1.26922	0.315455	4.02345	3.55807	1.91733	6.60285	5.74e-05	-1	0.000151
6m	D	N06DA	Anticholinesterases	160	10	391429	1713	1.33656	0.414662	3.22324	3.80591	1.68848	8.57868	0.00127	-1	0.00274
6m	D	N06DX	Other anti-dementia drugs	157	13	392296	846	2.26782	0.391042	5.79943	9.65834	4.48793	20.7854	6.66e-09	-1	2.94e-08
6m	D	R01AD	Corticosteroids	164	6	381243	11899	-0.000642167	0.475185	-0.0013514	0.999358	0.393769	2.5363	0.999	0	0.999
6m	D	R03AC	Selective beta-2-adrenoreceptor agonists	149	21	377701	15441	0.837374	0.361868	2.31403	2.31029	1.13669	4.69559	0.0207	-1	0.0328
6m	D	R03AK	Adrenergics in combination with corticosteroids or other drugs, excl. anticholinergics	160	10	379736	13406	0.212414	0.48712	0.436061	1.23666	0.476005	3.21284	0.663	0	0.723
6m	D	R03AL	Adrenergics in combination with anticholinergics incl. triple combinations with corticosteroids	164	6	390974	2168	0.795176	0.618499	1.28565	2.21483	0.658979	7.44406	0.199	0	0.254
6m	D	R05CB	Mucolytics	162	8	390617	2525	1.31362	0.490811	2.67642	3.7196	1.4214	9.73367	0.00744	-1	0.013
6m	D	R05DA	Opium alkaloids and derivatives	162	8	388233	4909	0.887339	0.444466	1.99642	2.42866	1.01633	5.80361	0.0459	-1	0.0676
6m	D	R06AE	Piperazine derivatives	154	16	387786	5356	1.74171	0.310323	5.61256	5.70709	3.10646	10.4849	2e-08	-1	8e-08
6m	D	R06AX	Other antihistamines for systemic use	165	5	386236	6906	0.164453	0.604542	0.27203	1.17875	0.360439	3.85487	0.786	0	0.825
6m	D	S01AA	Antibiotics	160	10	391960	1182	2.54143	0.407871	6.23095	12.6978	5.70881	28.2429	4.64e-10	-1	2.29e-09
6m	D	S01XA	Other ophthalmologicals	159	11	380151	12991	0.174214	0.386087	0.451231	1.19031	0.558498	2.53687	0.652	0	0.72
6m	D	V07AY	Other non-therapeutic auxiliary products	156	14	389076	4066	1.43875	0.41353	3.47918	4.21542	1.87431	9.48068	0.000503	-1	0.00117
6m	E	A01AB	Antiinfectives and antiseptics for local oral treatment	3791	67	390749	2393	1.07142	0.126621	8.46167	2.91953	2.27789	3.74191	2.64e-17	-1	2.39e-16
6m	E	A01AD	Other agents for local oral treatment	3838	20	392584	558	1.17706	0.251159	4.68652	3.24482	1.98337	5.30858	2.78e-06	-1	1.05e-05
6m	E	A02BA	H2-receptor antagonists [DG:DG01481]	3807	51	390176	2966	0.434584	0.161211	2.69575	1.54432	1.12594	2.11817	0.00702	-1	0.0159
6m	E	A02BC	Proton pump inhibitors [DG:DG01646]	2870	988	321442	71700	0.375515	0.0413872	9.07321	1.45574	1.34232	1.57875	1.16e-19	-1	1.34e-18
6m	E	A02BX	Other drugs for peptic ulcer and gastro-oesophageal reflux disease (GORD)	3755	103	388391	4751	0.814593	0.109443	7.44311	2.25826	1.82228	2.79854	9.85e-14	-1	8.2e-13
6m	E	A03AA	Synthetic anticholinergics, esters with tertiary amino group	3828	30	390973	2169	0.240589	0.199714	1.20467	1.272	0.859982	1.88141	0.228	0	0.31
6m	E	A03AX	Other drugs for functional gastrointestinal disorders	3844	14	392272	870	0.360315	0.295643	1.21875	1.43378	0.803213	2.55938	0.223	0	0.305
6m	E	A03BB	Belladonna alkaloids, semisynthetic, quaternary ammonium compounds	3805	53	391773	1369	1.3086	0.149662	8.74375	3.70101	2.76011	4.96264	2.26e-18	-1	2.35e-17
6m	E	A03FA	Propulsives [DG:DG01763]	3830	28	392314	828	1.05128	0.216851	4.84795	2.86133	1.87061	4.37675	1.25e-06	-1	4.91e-06
6m	E	A04AA	Serotonin (5HT3) antagonists	3852	6	392969	173	1.46174	0.392555	3.72365	4.31344	1.99839	9.3104	0.000196	-1	0.00061
6m	E	A05AA	Bile acid and derivatives [DG:DG01956]	3851	7	392750	392	0.384215	0.450437	0.852984	1.46846	0.607364	3.55039	0.394	0	0.479
6m	E	A06AA	Softeners, emollients	3769	89	390791	2351	1.14776	0.132509	8.66168	3.15111	2.43036	4.08561	4.67e-18	-1	4.63e-17
6m	E	A06AB	Contact laxatives	3711	147	390079	3063	1.38455	0.104865	13.2032	3.99303	3.25118	4.90414	8.57e-40	-1	3.57e-38
6m	E	A06AC	Bulk-forming laxatives	3847	11	391717	1425	-0.0122428	0.305497	-0.0400751	0.987832	0.542804	1.79773	0.968	0	0.973
6m	E	A06AD	Osmotically acting laxatives	3605	253	383979	9163	1.05354	0.0755972	13.9362	2.86777	2.47284	3.32578	3.91e-44	-1	2.71e-42
6m	E	A06AG	Enemas	3846	12	393008	134	1.96194	0.356317	5.50617	7.11313	3.53803	14.3008	3.67e-08	-1	1.86e-07
6m	E	A06AX	Other drugs for constipation	3845	13	392673	469	0.91462	0.310414	2.94645	2.49583	1.35828	4.58607	0.00321	-1	0.00769
6m	E	A07AA	Antibiotics	3828	30	392442	700	1.27668	0.216238	5.90406	3.58473	2.34635	5.4767	3.55e-09	-1	2.31e-08
6m	E	A07DA	Antipropulsives	3805	53	391115	2027	0.87355	0.160246	5.45131	2.3954	1.74975	3.27929	5e-08	-1	2.42e-07
6m	E	A07EC	Aminosalicylic acid and similar agents	3826	32	390543	2599	0.139519	0.18942	0.736559	1.14972	0.793153	1.66659	0.461	0	0.548
6m	E	A08AB	Peripherally acting antiobesity products	3850	8	392954	188	0.852137	0.408988	2.08352	2.34465	1.05183	5.2265	0.0372	-1	0.065
6m	E	A09AB	Acid preparations	3853	5	393111	31	2.64871	0.579116	4.57372	14.1358	4.54334	43.9811	4.79e-06	-1	1.72e-05
6m	E	A10AB	Insulins and analogues for injection, fast-acting	3731	127	387223	5919	0.330069	0.128594	2.56675	1.39106	1.08115	1.78981	0.0103	-1	0.0217
6m	E	A10AC	Insulins and analogues for injection, intermediate-acting	3839	19	392389	753	0.204643	0.335638	0.609713	1.22709	0.635593	2.36903	0.542	0	0.623
6m	E	A10AD	Insulins and analogues for injection, intermediate- or long-acting combined with fast-acting	3821	37	391869	1273	0.393954	0.24243	1.62502	1.48283	0.922008	2.38479	0.104	0	0.156
6m	E	A10AE	Insulins and analogues for injection, long-acting	3827	31	391195	1947	-0.243896	0.253913	-0.960552	0.783569	0.476372	1.28887	0.337	0	0.422
6m	E	A10BA	Biguanides [DG:DG01684]	3587	271	375684	17458	0.118652	0.0868054	1.36687	1.12598	0.949819	1.33481	0.172	0	0.243
6m	E	A10BB	Sulfonylureas	3774	84	388238	4904	0.184755	0.142511	1.29642	1.20292	0.90977	1.59054	0.195	0	0.272
6m	E	A10BD	Combinations of oral blood glucose lowering drugs	3852	6	392855	287	0.274056	0.460015	0.595754	1.31529	0.533893	3.24032	0.551	0	0.629
6m	E	A10BG	Thiazolidinediones [DG:DG01683]	3850	8	392553	589	-0.180431	0.449975	-0.40098	0.83491	0.345636	2.01679	0.688	0	0.741
6m	E	A10BH	Dipeptidyl peptidase 4 (DPP-4) inhibitors [DG:DG01601]	3781	77	388544	4598	0.0548103	0.1523	0.359885	1.05634	0.783729	1.42378	0.719	0	0.759
6m	E	A10BJ	Glucagon-like peptide-1 receptor (GLP-1) analogues	3832	26	391729	1413	-0.13959	0.260483	-0.535889	0.869715	0.521979	1.44911	0.592	0	0.655
6m	E	A10BK	Sodium-glucose co-transporter 2 (SGLT2) inhibitors	3805	53	390308	2834	0.126859	0.165833	0.764982	1.13526	0.820232	1.57127	0.444	0	0.537
6m	E	A11CC	Vitamin D and analogues	3774	84	389402	3740	0.608484	0.130191	4.67378	1.83764	1.42378	2.37181	2.96e-06	-1	1.1e-05
6m	E	A11DA	Vitamin B1, plain	3823	35	391982	1160	0.651215	0.216434	3.00884	1.91787	1.25484	2.93122	0.00262	-1	0.00642
6m	E	A11EX	Vitamin B-complex, other combinations	3850	8	392543	599	-0.113933	0.423773	-0.268854	0.892318	0.388868	2.04756	0.788	0	0.82
6m	E	A12AA	Calcium	3848	10	392667	475	0.836746	0.338175	2.4743	2.30884	1.18998	4.47971	0.0134	-1	0.026
6m	E	A12AX	Calcium, combinations with vitamin D and/or other drugs	3565	293	368867	24275	0.184728	0.0708023	2.60906	1.20289	1.04703	1.38195	0.00908	-1	0.0197
6m	E	B01AA	Vitamin K antagonists	3800	58	388932	4210	0.0930402	0.169808	0.547913	1.09751	0.786802	1.53091	0.584	0	0.65
6m	E	B01AB	Heparin group	3846	12	392922	220	1.60584	0.32761	4.90168	4.98203	2.62146	9.46824	9.51e-07	-1	3.85e-06
6m	E	B01AC	Platelet aggregation inhibitors excl. heparin	3421	437	360572	32570	0.247541	0.0657629	3.76415	1.28087	1.12597	1.45708	0.000167	-1	0.000527
6m	E	B01AE	Direct thrombin inhibitors	3850	8	392499	643	0.513318	0.369651	1.38866	1.67083	0.809623	3.4481	0.165	0	0.235
6m	E	B01AF	Direct factor Xa inhibitors	3647	211	379720	13422	0.433329	0.0852579	5.08256	1.54238	1.30503	1.82291	3.73e-07	-1	1.65e-06
6m	E	B03AA	Iron bivalent, oral preparations	3747	111	388952	4190	0.625436	0.124322	5.03078	1.86906	1.46487	2.38477	4.89e-07	-1	2.08e-06
6m	E	B03BA	Vitamin B12 (cyanocobalamin and analogues)	3767	91	389070	4072	0.698987	0.119576	5.84553	2.01171	1.59141	2.54302	5.05e-09	-1	3.17e-08
6m	E	B03BB	Folic acid and derivatives	3732	126	387909	5233	0.615366	0.112044	5.49217	1.85033	1.48552	2.30474	3.97e-08	-1	1.97e-07
6m	E	B05CB	Salt solutions	3844	14	392957	185	1.90865	0.331725	5.7537	6.74394	3.52005	12.9205	8.74e-09	-1	4.78e-08
6m	E	B05XA	Electrolyte solutions	3851	7	392788	354	-0.274753	0.612554	-0.448537	0.75976	0.228701	2.52397	0.654	0	0.716
6m	E	C01AA	Digitalis glycosides [DG:DG01697]	3824	34	391313	1829	0.429177	0.227296	1.88819	1.53599	0.983817	2.39808	0.059	0	0.093
6m	E	C01BD	Antiarrhythmics, class III [DG:DG01648]	3849	9	392669	473	0.496544	0.401722	1.23604	1.64303	0.747651	3.61072	0.216	0	0.298
6m	E	C01CA	Adrenergic and dopaminergic agents	3848	10	392730	412	0.838493	0.337652	2.48331	2.31288	1.19328	4.48294	0.013	-1	0.0258
6m	E	C01DA	Organic nitrates	3733	125	387790	5352	0.639294	0.123114	5.1927	1.89514	1.48884	2.41233	2.07e-07	-1	9.57e-07
6m	E	C01DX	Other vasodilators used in cardiac diseases	3841	17	391954	1188	-0.196984	0.352128	-0.559411	0.821204	0.411831	1.63751	0.576	0	0.647
6m	E	C01EB	Other cardiac preparations	3835	23	392236	906	0.595232	0.266333	2.23492	1.81345	1.07598	3.0564	0.0254	-1	0.0483
6m	E	C02AC	Imidazoline receptor agonists	3852	6	392717	425	0.0147088	0.508311	0.0289366	1.01482	0.374724	2.7483	0.977	0	0.977
6m	E	C02CA	Alpha-adrenoreceptor antagonists	3783	75	386564	6578	-0.0356552	0.138003	-0.258366	0.964973	0.736286	1.26469	0.796	0	0.82
6m	E	C03AA	Thiazides, plain [DG:DG01749]	3748	110	381539	11603	0.00465528	0.108845	0.0427697	1.00467	0.811656	1.24357	0.966	0	0.973
6m	E	C03BA	Sulfonamides, plain	3784	74	387003	6139	0.0728276	0.132954	0.547765	1.07555	0.828815	1.39572	0.584	0	0.65
6m	E	C03CA	Sulfonamides, plain	3679	179	385186	7956	0.577714	0.103728	5.56949	1.78196	1.45413	2.1837	2.56e-08	-1	1.37e-07
6m	E	C03DA	Aldosterone antagonists	3810	48	390343	2799	0.32647	0.178663	1.82729	1.38607	0.976574	1.96726	0.0677	0	0.106
6m	E	C03EB	High-ceiling diuretics and potassium-sparing agents	3850	8	392884	258	0.817346	0.471775	1.73249	2.26448	0.89824	5.70881	0.0832	0	0.126
6m	E	C05AX	Other agents for treatment of hemorrhoids and anal fissures for topical use	3829	29	391856	1286	0.656967	0.209307	3.13877	1.92893	1.27984	2.90723	0.0017	-1	0.00436
6m	E	C07AA	Beta blocking agents, non-selective	3826	32	390241	2901	0.130427	0.176849	0.737502	1.13931	0.80558	1.61131	0.461	0	0.548
6m	E	C07AB	Beta blocking agents, selective	3460	398	360608	32534	0.116482	0.0668626	1.74211	1.12354	0.985539	1.28086	0.0815	0	0.126
6m	E	C07AG	Alpha and beta blocking agents	3845	13	392698	444	0.748945	0.35766	2.09402	2.11477	1.04911	4.26289	0.0363	-1	0.065
6m	E	C08CA	Dihydropyridine derivatives [DG:DG01928]	3320	538	344730	48412	0.11328	0.053083	2.13402	1.11995	1.00928	1.24274	0.0328	-1	0.0599
6m	E	C08DA	Phenylalkylamine derivatives	3849	9	392535	607	0.515598	0.354701	1.45361	1.67464	0.8356	3.35617	0.146	0	0.214
6m	E	C08DB	Benzothiazepine derivatives	3833	25	390349	2793	-0.340754	0.249904	-1.36354	0.711234	0.435806	1.16073	0.173	0	0.243
6m	E	C09AA	ACE inhibitors, plain [DG:DG01501]	3355	503	347068	46074	-0.0224321	0.0557745	-0.402194	0.977818	0.876561	1.09077	0.688	0	0.741
6m	E	C09CA	Angiotensin II receptor blockers, plain [DG:DG01495]	3571	287	367332	25810	0.0641805	0.0705868	0.909243	1.06628	0.928516	1.22449	0.363	0	0.449
6m	E	C09DX	Angiotensin II receptor blockers (ARBs), other combinations	3850	8	392813	329	0.525861	0.460249	1.14256	1.69191	0.686456	4.17008	0.253	0	0.338
6m	E	C10AA	HMG CoA reductase inhibitors [DG:DG01660]	2751	1107	291331	101811	0.132415	0.0420482	3.14912	1.14158	1.05127	1.23965	0.00164	-1	0.00426
6m	E	C10AB	Fibrates	3844	14	391858	1284	-0.373269	0.350545	-1.06483	0.68848	0.346343	1.3686	0.287	0	0.371
6m	E	C10AC	Bile acid sequestrants	3849	9	392692	450	0.625608	0.349778	1.78858	1.86938	0.941815	3.71048	0.0737	0	0.114
6m	E	C10AX	Other lipid modifying agents	3819	39	389960	3182	0.157597	0.18024	0.874375	1.17069	0.822286	1.66673	0.382	0	0.47
6m	E	D01AC	Imidazole and triazole derivatives	3743	115	389431	3711	1.01717	0.106549	9.54647	2.76536	2.24417	3.40759	1.35e-21	-1	1.87e-20
6m	E	D01AE	Other antifungals for topical use	3846	12	392435	707	0.499913	0.305039	1.63885	1.64858	0.906691	2.9975	0.101	0	0.153
6m	E	D01AX		3803	55	391324	1818	1.03822	0.150654	6.89143	2.8242	2.10212	3.79431	5.53e-12	-1	4.26e-11
6m	E	D01BA	Antifungals for systemic use	3849	9	392691	451	0.686899	0.327949	2.09453	1.98754	1.04512	3.77979	0.0362	-1	0.065
6m	E	D02AC	Soft paraffin and fat products	3813	45	389978	3164	0.333204	0.169037	1.97119	1.39543	1.0019	1.94354	0.0487	-1	0.0791
6m	E	D02AE	Carbamide products	3840	18	392351	791	0.800596	0.262332	3.05185	2.22687	1.33167	3.72385	0.00228	-1	0.00563
6m	E	D02AX	Other emollients and protectives	3631	227	383910	9232	0.806799	0.0791994	10.1869	2.24072	1.91855	2.617	2.28e-24	-1	3.95e-23
6m	E	D05AX	Other antipsoriatics for topical use	3836	22	391904	1238	0.564968	0.221059	2.55573	1.75939	1.14076	2.71349	0.0106	-1	0.022
6m	E	D06AX	Other antibiotics for topical use	3836	22	392320	822	0.917377	0.230765	3.97537	2.50272	1.59215	3.93405	7.03e-05	-1	0.000228
6m	E	D06BA	Sulfonamides	3853	5	393110	32	2.68136	0.529714	5.0619	14.605	5.17137	41.2473	4.15e-07	-1	1.8e-06
6m	E	D06BX	Other chemotherapeutics	3852	6	392603	539	0.147592	0.401805	0.367322	1.15904	0.527328	2.54751	0.713	0	0.759
6m	E	D07AA	Corticosteroids, weak (group I)	3830	28	391847	1295	0.942312	0.187533	5.02477	2.56591	1.77669	3.7057	5.04e-07	-1	2.1e-06
6m	E	D07AB	Corticosteroids, moderately potent (group II)	3832	26	391878	1264	0.680422	0.213966	3.18004	1.97471	1.2983	3.00353	0.00147	-1	0.00392
6m	E	D07AC	Corticosteroids, potent (group III)	3776	82	389167	3975	0.722517	0.119584	6.04195	2.05961	1.62928	2.60361	1.52e-09	-1	1.02e-08
6m	E	D07AD	Corticosteroids, very potent (group IV)	3833	25	391767	1375	0.600643	0.212869	2.82165	1.82329	1.20133	2.76727	0.00478	-1	0.0112
6m	E	D07CA	Corticosteroids, weak, combinations with antibiotics	3844	14	392660	482	0.985027	0.293286	3.35859	2.67788	1.50711	4.75815	0.000784	-1	0.00223
6m	E	D07CC	Corticosteroids, potent, combinations with antibiotics	3822	36	392104	1038	1.05569	0.19525	5.40687	2.87396	1.96012	4.21384	6.42e-08	-1	3.03e-07
6m	E	D07CD	Corticosteroids, very potent, combinations with antibiotics	3848	10	392853	289	1.06019	0.366981	2.88895	2.88692	1.40624	5.92666	0.00386	-1	0.00914
6m	E	D09AA	Medicated dressings with antiinfectives	3845	13	392977	165	1.95896	0.338094	5.79412	7.09191	3.65575	13.7578	6.87e-09	-1	3.86e-08
6m	E	D11AC	Medicated shampoos	3843	15	392528	614	0.418661	0.337414	1.24079	1.51992	0.784538	2.94462	0.215	0	0.298
6m	E	G01AF	Imidazole derivatives	3836	22	392482	660	0.907092	0.253039	3.58479	2.47711	1.50854	4.06755	0.000337	-1	0.001
6m	E	G03AC	Progestogens	3852	6	392861	281	0.279352	0.376478	0.742015	1.32227	0.63221	2.76555	0.458	0	0.548
6m	E	G03BA	3-oxoandrosten (4) derivatives	3841	17	392408	734	0.581268	0.265363	2.19047	1.78831	1.06307	3.00829	0.0285	-1	0.0529
6m	E	G03CA	Natural and semisynthetic estrogens, plain	3747	111	383423	9719	0.195021	0.0935744	2.08412	1.21534	1.01169	1.45998	0.0372	-1	0.065
6m	E	G03DA	Pregnen (4) derivatives	3848	10	392571	571	0.41886	0.27767	1.50848	1.52023	0.882176	2.61977	0.131	0	0.195
6m	E	G03FA	Progestogens and estrogens, fixed combinations	3849	9	392698	444	0.672176	0.283982	2.36697	1.95849	1.12253	3.41703	0.0179	-1	0.0345
6m	E	G03FB	Progestogens and estrogens, sequential preparations	3842	16	392522	620	0.767148	0.226804	3.38242	2.15362	1.38074	3.35912	0.000719	-1	0.00208
6m	E	G04BD	Urinary antispasmodics	3762	96	385895	7247	0.240145	0.115077	2.08682	1.27143	1.0147	1.59312	0.0369	-1	0.065
6m	E	G04BE	Drugs used in erectile dysfunction	3748	110	385919	7223	0.338869	0.103184	3.28412	1.40336	1.14641	1.71791	0.00102	-1	0.0028
6m	E	G04CA	Alpha-adrenoreceptor antagonists	3844	14	392189	953	0.550631	0.278835	1.97476	1.73435	1.00413	2.99558	0.0483	-1	0.0791
6m	E	G04CB	Testosterone-5-alpha reductase inhibitors	3793	65	386614	6528	-0.0583182	0.15239	-0.382691	0.94335	0.699774	1.27171	0.702	0	0.753
6m	E	H02AA	Mineralocorticoids	3847	11	392771	371	0.849297	0.380884	2.22981	2.338	1.10824	4.93236	0.0258	-1	0.0483
6m	E	H02AB	Glucocorticoids	3670	188	386491	6651	1.03882	0.0867499	11.9749	2.82589	2.38404	3.34963	4.87e-33	-1	1.45e-31
6m	E	H02BX	Corticosteroids for systemic use, combinations	3853	5	392899	243	0.882626	0.443753	1.989	2.41724	1.01297	5.76825	0.0467	-1	0.0777
6m	E	H03AA	Thyroid hormones	3607	251	367529	25613	0.0178386	0.0685652	0.26017	1.018	0.889988	1.16442	0.795	0	0.82
6m	E	J01AA	Tetracyclines [DG:DG01197]	3673	185	389325	3817	1.5484	0.0844652	18.3318	4.70392	3.98623	5.55082	4.96e-75	-1	5.16e-73
6m	E	J01CA	Penicillins with extended spectrum [DG:DG01780]	3606	252	388974	4168	1.85799	0.0726458	25.576	6.41082	5.56003	7.39179	3.7e-144	-1	7.7e-142
6m	E	J01CE	Beta-lactamase sensitive penicillins [DG:DG01778]	3842	16	392188	954	0.387615	0.270292	1.43406	1.47346	0.867492	2.50272	0.152	0	0.218
6m	E	J01CF	Beta-lactamase resistant penicillins [DG:DG01779]	3728	130	389139	4003	1.0211	0.101904	10.0202	2.77625	2.27362	3.39	1.25e-23	-1	2e-22
6m	E	J01CR	Combinations of penicillins, incl. beta-lactamase inhibitors	3794	64	391685	1457	1.344	0.144694	9.28856	3.83434	2.88753	5.0916	1.57e-20	-1	1.92e-19
6m	E	J01DB	First-generation cephalosporins [DG:DG01774]	3836	22	392173	969	0.668326	0.266202	2.5106	1.95097	1.15787	3.28732	0.012	-1	0.0246
6m	E	J01EA	Trimethoprim and derivatives [DG:DG01581]	3810	48	391541	1601	1.10091	0.161375	6.82209	3.00692	2.19158	4.12557	8.99e-12	-1	6.68e-11
6m	E	J01EE	Combinations of sulfonamides and trimethoprim, incl. derivatives	3848	10	392930	212	1.23523	0.39169	3.15359	3.43917	1.59605	7.41074	0.00161	-1	0.00424
6m	E	J01FA	Macrolides [DG:DG01551]	3775	83	390713	2429	1.17757	0.123851	9.50796	3.24647	2.54677	4.13841	1.96e-21	-1	2.55e-20
6m	E	J01FF	Lincosamides [DG:DG01578]	3852	6	393018	124	0.897731	0.600453	1.49509	2.45403	0.756435	7.96137	0.135	0	0.199
6m	E	J01MA	Fluoroquinolones [DG:DG01549]	3837	21	392374	768	0.799653	0.260873	3.06529	2.22477	1.33422	3.70972	0.00217	-1	0.00552
6m	E	J01XE	Nitrofuran derivatives	3699	159	387245	5897	1.02487	0.0884132	11.5918	2.78673	2.34335	3.314	4.59e-31	-1	1.06e-29
6m	E	J02AC	Triazole derivatives	3835	23	392511	631	1.16819	0.226303	5.16203	3.21615	2.06398	5.0115	2.44e-07	-1	1.1e-06
6m	E	J05AB	Nucleosides and nucleotides excl. reverse transcriptase inhibitors [DG:DG02840]	3825	33	391838	1304	0.856848	0.181922	4.70996	2.35572	1.64919	3.36494	2.48e-06	-1	9.55e-06
6m	E	L01BC	Pyrimidine analogues	3850	8	392598	544	0.828349	0.331085	2.50192	2.28954	1.19654	4.38095	0.0124	-1	0.025
6m	E	L02AE	Gonadotropin releasing hormone analogues	3845	13	392154	988	0.0501143	0.37184	0.134774	1.05139	0.507286	2.17909	0.893	0	0.91
6m	E	L02BA	Anti-estrogens	3852	6	392390	752	-0.182193	0.382737	-0.476026	0.833441	0.393629	1.76466	0.634	0	0.698
6m	E	L02BG	Aromatase inhibitors [DG:DG01596]	3826	32	390266	2876	0.345922	0.173594	1.99271	1.41329	1.0057	1.98608	0.0463	-1	0.0776
6m	E	L04AA	Selective immunosuppressants	3849	9	392699	443	0.534377	0.372612	1.43414	1.70638	0.822068	3.54198	0.151	0	0.218
6m	E	L04AX	Other immunosuppressants	3820	38	389875	3267	0.190592	0.168471	1.1313	1.20997	0.869701	1.68336	0.258	0	0.34
6m	E	M01AB	Acetic acid derivatives and related substances	3841	17	392361	781	0.747657	0.244441	3.05864	2.11204	1.30808	3.41014	0.00222	-1	0.00557
6m	E	M01AE	Propionic acid derivatives	3731	127	384683	8459	0.369604	0.0901808	4.09848	1.44716	1.2127	1.72695	4.16e-05	-1	0.000142
6m	E	M01AH	Coxibs	3846	12	392365	777	0.309397	0.308369	1.00333	1.3626	0.744533	2.49376	0.316	0	0.398
6m	E	M02AA	Antiinflammatory preparations, non-steroids for topical use	3683	175	385354	7788	0.789697	0.089115	8.86155	2.20273	1.84972	2.62311	7.92e-19	-1	8.67e-18
6m	E	M03BA	Carbamic acid esters	3853	5	393077	65	1.28955	0.621433	2.07512	3.63115	1.07418	12.2747	0.038	-1	0.0658
6m	E	M03BX	Other centrally acting agents	3842	16	392444	698	0.820334	0.249376	3.28955	2.27126	1.39315	3.70285	0.001	-1	0.00277
6m	E	M04AA	Preparations inhibiting uric acid production	3736	122	385659	7483	0.212277	0.111039	1.91173	1.23649	0.994658	1.53712	0.0559	0	0.0901
6m	E	M04AC	Preparations with no effect on uric acid metabolism	3836	22	392329	813	0.668335	0.261861	2.55226	1.95099	1.16777	3.2595	0.0107	-1	0.022
6m	E	M05BA	Bisphosphonates [DG:DG01600]	3753	105	383579	9563	0.268122	0.108347	2.47467	1.30751	1.05735	1.61685	0.0133	-1	0.026
6m	E	M05BX	Other drugs affecting bone structure and mineralization	3851	7	392808	334	0.884134	0.436724	2.02447	2.42089	1.02857	5.69791	0.0429	-1	0.0732
6m	E	N01BB	Amides	3836	22	392419	723	1.01651	0.240509	4.22649	2.76353	1.72481	4.42778	2.37e-05	-1	8.22e-05
6m	E	N01BX	Other local anesthetics	3851	7	392804	338	0.304873	0.484903	0.62873	1.35645	0.524388	3.50878	0.529	0	0.615
6m	E	N02AA	Natural opium alkaloids	3743	115	389760	3382	1.07717	0.111638	9.64882	2.93636	2.3593	3.65457	5e-22	-1	7.43e-21
6m	E	N02AB	Phenylpiperidine derivatives	3845	13	392695	447	0.760213	0.340602	2.23197	2.13873	1.09707	4.16944	0.0256	-1	0.0483
6m	E	N02AE	Oripavine derivatives	3817	41	391776	1366	0.69232	0.208359	3.32273	1.99835	1.32836	3.00626	0.000892	-1	0.00251
6m	E	N02AJ	Opioids in combination with non-opioid analgesics	3636	222	381011	12131	0.529839	0.0766677	6.91085	1.69866	1.46166	1.97409	4.83e-12	-1	3.86e-11
6m	E	N02AX	Other opioids	3788	70	388889	4253	0.0918878	0.149063	0.616436	1.09624	0.818509	1.46821	0.538	0	0.621
6m	E	N02BE	Anilides	3250	608	364531	28611	0.739262	0.0535129	13.8146	2.09439	1.88585	2.32599	2.13e-43	-1	1.11e-41
6m	E	N02BG	Other analgesics and antipyretics	3851	7	392868	274	0.502065	0.473441	1.06046	1.65213	0.653205	4.17868	0.289	0	0.371
6m	E	N02CC	Selective serotonin (5HT1) agonists [DG:DG01943]	3820	38	390569	2573	0.449252	0.150335	2.98833	1.56714	1.16719	2.10413	0.00281	-1	0.0068
6m	E	N02CX	Other antimigraine preparations	3850	8	392529	613	-0.0583145	0.401523	-0.145233	0.943353	0.429434	2.0723	0.884	0	0.906
6m	E	N03AB	Hydantoin derivatives	3848	10	392753	389	0.710647	0.375807	1.89099	2.03531	0.97441	4.25127	0.0586	0	0.093
6m	E	N03AE	Benzodiazepine derivatives	3845	13	392626	516	0.648691	0.328646	1.97383	1.91304	1.00457	3.64307	0.0484	-1	0.0791
6m	E	N03AF	Carboxamide derivatives	3841	17	391953	1189	0.0183318	0.289371	0.0633505	1.0185	0.577628	1.79587	0.95	0	0.963
6m	E	N03AG	Fatty acid derivatives	3837	21	392133	1009	0.27744	0.25961	1.06868	1.31975	0.793432	2.19519	0.285	0	0.371
6m	E	N03AX	Other antiepileptics	3643	215	381073	12069	0.272362	0.0844633	3.22463	1.31306	1.11273	1.54946	0.00126	-1	0.0034
6m	E	N04BA	Dopa and dopa derivatives	3820	38	391095	2047	0.671983	0.185614	3.62033	1.95812	1.36095	2.8173	0.000294	-1	0.000886
6m	E	N04BB	Adamantane derivatives	3853	5	392965	177	0.645787	0.568741	1.13547	1.90749	0.625673	5.81536	0.256	0	0.339
6m	E	N04BC	Dopamine agonists	3833	25	391805	1337	0.583985	0.227653	2.56524	1.79317	1.14774	2.80156	0.0103	-1	0.0217
6m	E	N04BD	Monoamine oxidase B inhibitors	3852	6	392691	451	0.496685	0.41803	1.18816	1.64326	0.724233	3.72852	0.235	0	0.315
6m	E	N05AB	Phenothiazines with piperazine structure	3825	33	391541	1601	0.753552	0.187289	4.02348	2.12453	1.47178	3.06679	5.74e-05	-1	0.00019
6m	E	N05AD	Butyrophenone derivatives [DG:DG01940]	3849	9	393036	106	1.90264	0.409682	4.64419	6.70359	3.0032	14.9634	3.42e-06	-1	1.25e-05
6m	E	N05AH	Diazepines, oxazepines and thiazepines	3831	27	391863	1279	0.377583	0.217966	1.73231	1.45876	0.951588	2.23623	0.0832	0	0.126
6m	E	N05AN	Lithium	3853	5	392655	487	-0.339011	0.531363	-0.638003	0.712475	0.251461	2.01868	0.523	0	0.612
6m	E	N05AX	Other antipsychotics	3826	32	392498	644	1.17407	0.211067	5.56253	3.23513	2.1391	4.89275	2.66e-08	-1	1.38e-07
6m	E	N05BA	Benzodiazepine derivatives [DG:DG01914]	3766	92	390891	2251	1.33426	0.116823	11.4212	3.79719	3.0201	4.77422	3.31e-30	-1	6.88e-29
6m	E	N05BB	Diphenylmethane derivatives	3853	5	392831	311	0.162851	0.521674	0.31217	1.17686	0.423325	3.27172	0.755	0	0.793
6m	E	N05CD	Benzodiazepine derivatives	3808	50	392415	727	2.05805	0.164518	12.5095	7.83066	5.67231	10.8103	6.73e-36	-1	2.33e-34
6m	E	N05CF	Benzodiazepine related drugs	3790	68	390209	2933	0.833588	0.132923	6.27123	2.30156	1.77369	2.98653	3.59e-10	-1	2.49e-09
6m	E	N05CH	Melatonin receptor agonists	3852	6	392822	320	0.401556	0.468005	0.858017	1.49415	0.597071	3.73906	0.391	0	0.478
6m	E	N06AA	Non-selective monoamine reuptake inhibitors [DG:DG01730]	3673	185	379961	13181	0.224654	0.0841541	2.66956	1.25189	1.06153	1.47638	0.0076	-1	0.017
6m	E	N06AB	Selective serotonin reuptake inhibitors	3539	319	372620	20522	0.238626	0.0668151	3.57144	1.2695	1.11368	1.44713	0.000355	-1	0.00104
6m	E	N06AX	Other antidepressants	3688	170	385054	8088	0.532764	0.0913951	5.82924	1.70363	1.42423	2.03785	5.57e-09	-1	3.31e-08
6m	E	N06DA	Anticholinesterases	3795	63	391429	1713	1.26749	0.163052	7.77354	3.55192	2.58032	4.88937	7.65e-15	-1	6.63e-14
6m	E	N06DX	Other anti-dementia drugs	3794	64	392296	846	1.98234	0.170065	11.6564	7.25969	5.20186	10.1316	2.16e-31	-1	5.62e-30
6m	E	N07BC	Drugs used in opioid dependence	3853	5	393094	48	2.15463	0.498758	4.31999	8.6247	3.24488	22.9239	1.56e-05	-1	5.5e-05
6m	E	N07CA	Antivertigo preparations	3820	38	391129	2013	0.527726	0.187659	2.81216	1.69507	1.17342	2.44864	0.00492	-1	0.0114
6m	E	P01AB	Nitroimidazole derivatives	3836	22	392681	461	1.51799	0.225569	6.72963	4.56306	2.93259	7.10005	1.7e-11	-1	1.22e-10
6m	E	P01BA	Aminoquinolines	3840	18	391813	1329	0.187253	0.258831	0.723458	1.20593	0.726115	2.00281	0.469	0	0.555
6m	E	P01BC	Methanolquinolines	3815	43	390215	2927	0.192667	0.191715	1.00496	1.21248	0.832693	1.76548	0.315	0	0.398
6m	E	R01AC	Antiallergic agents, excl. corticosteroids	3851	7	392813	329	0.608472	0.422105	1.44152	1.83762	0.80345	4.20294	0.149	0	0.217
6m	E	R01AD	Corticosteroids	3696	162	381243	11899	0.32305	0.0848826	3.80585	1.38133	1.16962	1.63137	0.000141	-1	0.000451
6m	E	R01AX	Other nasal preparations	3853	5	392981	161	1.02297	0.510536	2.00372	2.78144	1.02259	7.56555	0.0451	-1	0.0763
6m	E	R03AC	Selective beta-2-adrenoreceptor agonists	3524	334	377701	15441	0.732918	0.0718787	10.1966	2.08114	1.80767	2.39599	2.07e-24	-1	3.91e-23
6m	E	R03AK	Adrenergics in combination with corticosteroids or other drugs, excl. anticholinergics	3649	209	379736	13406	0.316475	0.0872098	3.62889	1.37228	1.15667	1.62808	0.000285	-1	0.000871
6m	E	R03AL	Adrenergics in combination with anticholinergics incl. triple combinations with corticosteroids	3822	36	390974	2168	0.260842	0.217067	1.20166	1.29802	0.84823	1.98633	0.23	0	0.311
6m	E	R03BA	Glucocorticoids	3745	113	386444	6698	0.508272	0.103744	4.8993	1.66242	1.35654	2.03726	9.62e-07	-1	3.85e-06
6m	E	R03BB	Anticholinergics	3794	64	388919	4223	0.0620418	0.171186	0.362423	1.06401	0.760729	1.48819	0.717	0	0.759
6m	E	R03DA	Xanthines	3848	10	392713	429	0.437754	0.407325	1.07471	1.54922	0.697265	3.44216	0.282	0	0.37
6m	E	R03DC	Leukotriene receptor antagonists	3827	31	390577	2565	-0.123846	0.209194	-0.592012	0.883516	0.586337	1.33132	0.554	0	0.629
6m	E	R05CB	Mucolytics	3808	50	390617	2525	0.488663	0.183637	2.66103	1.63013	1.13739	2.33634	0.00779	-1	0.0172
6m	E	R05DA	Opium alkaloids and derivatives	3756	102	388233	4909	0.647527	0.111412	5.81202	1.91081	1.53597	2.37712	6.18e-09	-1	3.57e-08
6m	E	R06AB	Substituted alkylamines	3845	13	392582	560	0.76933	0.309886	2.48263	2.15832	1.17582	3.96179	0.013	-1	0.0258
6m	E	R06AD	Phenothiazine derivatives	3844	14	392619	523	0.662261	0.306199	2.16284	1.93917	1.06409	3.5339	0.0306	-1	0.0562
6m	E	R06AE	Piperazine derivatives	3723	135	387786	5356	0.845029	0.0991594	8.52192	2.32804	1.91684	2.82746	1.58e-17	-1	1.49e-16
6m	E	R06AX	Other antihistamines for systemic use	3762	96	386236	6906	0.284271	0.108154	2.62838	1.32879	1.07497	1.64255	0.00858	-1	0.0188
6m	E	S01AA	Antibiotics	3818	40	391960	1182	1.08224	0.185266	5.84156	2.95129	2.05264	4.24336	5.18e-09	-1	3.17e-08
6m	E	S01BA	Corticosteroids, plain	3851	7	392456	686	0.217389	0.370734	0.586375	1.24283	0.600954	2.57028	0.558	0	0.63
6m	E	S01EC	Carbonic anhydrase inhibitors	3838	20	390622	2520	-0.161107	0.250803	-0.642364	0.851201	0.520652	1.39161	0.521	0	0.612
6m	E	S01ED	Beta blocking agents	3830	28	389496	3646	-0.196837	0.212081	-0.928124	0.821324	0.54199	1.24463	0.353	0	0.44
6m	E	S01EE	Prostaglandin analogues	3803	55	387111	6031	0.0606671	0.144624	0.419481	1.06255	0.800282	1.41076	0.675	0	0.735
6m	E	S01GX	Other antiallergics	3837	21	391767	1375	0.249917	0.2405	1.03916	1.28392	0.801352	2.05708	0.299	0	0.382
6m	E	S01XA	Other ophthalmologicals	3712	146	380151	12991	0.191556	0.0933855	2.05124	1.21113	1.00856	1.45439	0.0402	-1	0.0692
6m	E	S02AA	Antiinfectives	3852	6	392761	381	0.146759	0.508625	0.288541	1.15807	0.427359	3.1382	0.773	0	0.808
6m	E	S02CA	Corticosteroids and antiinfectives in combination	3852	6	392860	282	0.770216	0.405755	1.89823	2.16023	0.975259	4.78499	0.0577	0	0.0923
6m	E	V03AE	Drugs for treatment of hyperkalemia and hyperphosphatemia	3849	9	393041	101	1.43958	0.555029	2.59369	4.21891	1.42153	12.5211	0.00949	-1	0.0204
6m	E	V06DC	Carbohydrates	3848	10	393001	141	1.30569	0.464813	2.80906	3.69023	1.48389	9.17708	0.00497	-1	0.0114
6m	E	V07AY	Other non-therapeutic auxiliary products	3754	104	389076	4066	0.526314	0.13005	4.04702	1.69268	1.31183	2.18411	5.19e-05	-1	0.000174
6m	F	A01AB	Antiinfectives and antiseptics for local oral treatment	3791	67	26575	402	0.36888	0.138842	2.65683	1.44611	1.10158	1.89841	0.00789	-1	0.0659
6m	F	A01AD	Other agents for local oral treatment	3838	20	26861	116	0.247688	0.27282	0.907883	1.28106	0.750475	2.18677	0.364	0	0.742
6m	F	A02BA	H2-receptor antagonists [DG:DG01481]	3807	51	26386	591	-0.398764	0.168602	-2.36512	0.671149	0.48228	0.933983	0.018	1	0.117
6m	F	A02BC	Proton pump inhibitors [DG:DG01646]	2870	988	17691	9286	-0.321774	0.0432595	-7.43822	0.724862	0.665935	0.789005	1.05e-13	1	2.18e-11
6m	F	A02BX	Other drugs for peptic ulcer and gastro-oesophageal reflux disease (GORD)	3755	103	26190	787	0.123495	0.116918	1.05626	1.13144	0.899723	1.42285	0.291	0	0.695
6m	F	A03AA	Synthetic anticholinergics, esters with tertiary amino group	3828	30	26650	327	-0.411985	0.209621	-1.96538	0.662334	0.439178	0.998881	0.0494	1	0.257
6m	F	A03AX	Other drugs for functional gastrointestinal disorders	3844	14	26828	149	-0.382244	0.31056	-1.23082	0.682329	0.371222	1.25416	0.218	0	0.593
6m	F	A03BB	Belladonna alkaloids, semisynthetic, quaternary ammonium compounds	3805	53	26607	370	0.120727	0.159637	0.756263	1.12832	0.825169	1.54284	0.45	0	0.803
6m	F	A03FA	Propulsives [DG:DG01763]	3830	28	26694	283	-0.383834	0.22523	-1.70419	0.681244	0.438106	1.05932	0.0884	0	0.356
6m	F	A04AA	Serotonin (5HT3) antagonists	3852	6	26892	85	-0.29731	0.402218	-0.739177	0.742813	0.337674	1.63404	0.46	0	0.804
6m	F	A05AA	Bile acid and derivatives [DG:DG01956]	3851	7	26921	56	-0.257065	0.477027	-0.53889	0.773318	0.303596	1.96979	0.59	0	0.866
6m	F	A06AA	Softeners, emollients	3769	89	26392	585	0.134551	0.140381	0.958473	1.14402	0.868836	1.50637	0.338	0	0.727
6m	F	A06AB	Contact laxatives	3711	147	26155	822	0.332573	0.111545	2.98153	1.39455	1.12069	1.73534	0.00287	-1	0.0349
6m	F	A06AC	Bulk-forming laxatives	3847	11	26797	180	-0.487297	0.316591	-1.5392	0.614285	0.330276	1.14252	0.124	0	0.437
6m	F	A06AD	Osmotically acting laxatives	3605	253	24878	2099	-0.0123131	0.0795297	-0.154824	0.987762	0.845189	1.15439	0.877	0	0.971
6m	F	A06AG	Enemas	3846	12	26929	48	0.513844	0.382305	1.34407	1.67171	0.790185	3.53664	0.179	0	0.528
6m	F	A06AX	Other drugs for constipation	3845	13	26843	134	-0.302586	0.324321	-0.932982	0.738905	0.391304	1.39528	0.351	0	0.73
6m	F	A07AA	Antibiotics	3828	30	26766	211	-0.0267666	0.229165	-0.1168	0.973588	0.621301	1.52563	0.907	0	0.971
6m	F	A07DA	Antipropulsives	3805	53	26513	464	-0.0900684	0.16873	-0.5338	0.913869	0.65653	1.27208	0.594	0	0.866
6m	F	A07EC	Aminosalicylic acid and similar agents	3826	32	26657	320	-0.29822	0.200095	-1.4904	0.742138	0.501369	1.09853	0.136	0	0.45
6m	F	A08AB	Peripherally acting antiobesity products	3850	8	26946	31	0.229054	0.463787	0.493878	1.25741	0.506623	3.12082	0.621	0	0.873
6m	F	A09AB	Acid preparations	3853	5	26966	11	1.13517	0.636807	1.7826	3.11172	0.893156	10.8411	0.0747	0	0.327
6m	F	A10AB	Insulins and analogues for injection, fast-acting	3731	127	26049	928	-0.116534	0.137371	-0.848317	0.89	0.679916	1.165	0.396	0	0.768
6m	F	A10AC	Insulins and analogues for injection, intermediate-acting	3839	19	26843	134	-0.147475	0.35992	-0.409743	0.862884	0.426163	1.74715	0.682	0	0.908
6m	F	A10AD	Insulins and analogues for injection, intermediate- or long-acting combined with fast-acting	3821	37	26767	210	0.211153	0.265445	0.795468	1.2351	0.734085	2.07806	0.426	0	0.794
6m	F	A10AE	Insulins and analogues for injection, long-acting	3827	31	26650	327	-0.647335	0.266548	-2.42859	0.523439	0.310435	0.882593	0.0152	1	0.109
6m	F	A10BA	Biguanides [DG:DG01684]	3587	271	25112	1865	0.0406544	0.094559	0.429937	1.04149	0.865295	1.25357	0.667	0	0.907
6m	F	A10BB	Sulfonylureas	3774	84	26379	598	0.0227836	0.155587	0.146437	1.02305	0.754143	1.38783	0.884	0	0.971
6m	F	A10BD	Combinations of oral blood glucose lowering drugs	3852	6	26949	28	0.339403	0.517729	0.655561	1.40411	0.508969	3.87356	0.512	0	0.846
6m	F	A10BG	Thiazolidinediones [DG:DG01683]	3850	8	26924	53	0.119971	0.48573	0.246991	1.12746	0.435143	2.92128	0.805	0	0.971
6m	F	A10BH	Dipeptidyl peptidase 4 (DPP-4) inhibitors [DG:DG01601]	3781	77	26443	534	0.0344556	0.165934	0.207647	1.03506	0.747679	1.43289	0.836	0	0.971
6m	F	A10BJ	Glucagon-like peptide-1 receptor (GLP-1) analogues	3832	26	26813	164	-0.17704	0.284657	-0.621943	0.837746	0.479515	1.4636	0.534	0	0.848
6m	F	A10BK	Sodium-glucose co-transporter 2 (SGLT2) inhibitors	3805	53	26729	248	0.261052	0.18724	1.39421	1.2983	0.899473	1.87395	0.163	0	0.512
6m	F	A11CC	Vitamin D and analogues	3774	84	26290	687	-0.0925778	0.138314	-0.66933	0.911578	0.695114	1.19545	0.503	0	0.846
6m	F	A11DA	Vitamin B1, plain	3823	35	26709	268	-0.0887153	0.230569	-0.384766	0.915106	0.582375	1.43794	0.7	0	0.911
6m	F	A11EX	Vitamin B-complex, other combinations	3850	8	26845	132	-0.838734	0.436204	-1.9228	0.432258	0.183836	1.01638	0.0545	0	0.264
6m	F	A12AA	Calcium	3848	10	26903	74	0.15822	0.366249	0.432	1.17142	0.571412	2.40148	0.666	0	0.907
6m	F	A12AX	Calcium, combinations with vitamin D and/or other drugs	3565	293	24103	2874	-0.22265	0.074327	-2.99555	0.800395	0.691886	0.925921	0.00274	1	0.0349
6m	F	B01AA	Vitamin K antagonists	3800	58	26338	639	-0.272702	0.178689	-1.52612	0.76132	0.536365	1.08062	0.127	0	0.44
6m	F	B01AB	Heparin group	3846	12	26858	119	-0.426966	0.336121	-1.27027	0.652486	0.337639	1.26093	0.204	0	0.581
6m	F	B01AC	Platelet aggregation inhibitors excl. heparin	3421	437	23000	3977	-0.133371	0.0684334	-1.94892	0.87514	0.765288	1.00076	0.0513	0	0.26
6m	F	B01AE	Direct thrombin inhibitors	3850	8	26879	98	0.0258442	0.39449	0.0655129	1.02618	0.47361	2.22345	0.948	0	0.971
6m	F	B01AF	Direct factor Xa inhibitors	3647	211	24925	2052	-0.128769	0.0894724	-1.4392	0.879177	0.737759	1.0477	0.15	0	0.488
6m	F	B03AA	Iron bivalent, oral preparations	3747	111	26001	976	-0.272938	0.130117	-2.09763	0.76114	0.589799	0.982257	0.036	1	0.204
6m	F	B03BA	Vitamin B12 (cyanocobalamin and analogues)	3767	91	26279	698	0.0651374	0.127734	0.509947	1.06731	0.830917	1.37095	0.61	0	0.869
6m	F	B03BB	Folic acid and derivatives	3732	126	26049	928	0.018357	0.119607	0.153478	1.01853	0.805673	1.28762	0.878	0	0.971
6m	F	B05CB	Salt solutions	3844	14	26903	74	0.32978	0.353568	0.93272	1.39066	0.695428	2.78093	0.351	0	0.73
6m	F	B05XA	Electrolyte solutions	3851	7	26888	89	-0.884859	0.631171	-1.40193	0.412772	0.119794	1.42228	0.161	0	0.512
6m	F	C01AA	Digitalis glycosides [DG:DG01697]	3824	34	26619	358	-0.0743076	0.238646	-0.311372	0.928386	0.581547	1.48208	0.755	0	0.964
6m	F	C01BD	Antiarrhythmics, class III [DG:DG01648]	3849	9	26871	106	-0.401354	0.422676	-0.949556	0.669413	0.292346	1.53282	0.342	0	0.727
6m	F	C01CA	Adrenergic and dopaminergic agents	3848	10	26906	71	-0.0315848	0.360481	-0.0876184	0.968909	0.478001	1.96398	0.93	0	0.971
6m	F	C01DA	Organic nitrates	3733	125	25901	1076	-0.0721647	0.127625	-0.565444	0.930378	0.72447	1.19481	0.572	0	0.866
6m	F	C01DX	Other vasodilators used in cardiac diseases	3841	17	26777	200	-0.421697	0.366513	-1.15056	0.655933	0.319794	1.34539	0.25	0	0.632
6m	F	C01EB	Other cardiac preparations	3835	23	26806	171	0.238321	0.286877	0.830743	1.26912	0.723272	2.2269	0.406	0	0.768
6m	F	C02AC	Imidazoline receptor agonists	3852	6	26919	58	-0.219539	0.541173	-0.405673	0.802889	0.277965	2.31911	0.685	0	0.908
6m	F	C02CA	Alpha-adrenoreceptor antagonists	3783	75	26195	782	-0.247062	0.145293	-1.70044	0.781092	0.587521	1.03844	0.0891	0	0.356
6m	F	C03AA	Thiazides, plain [DG:DG01749]	3748	110	26021	956	0.023961	0.115966	0.206622	1.02425	0.816004	1.28564	0.836	0	0.971
6m	F	C03BA	Sulfonamides, plain	3784	74	26335	642	-0.171136	0.141217	-1.21187	0.842707	0.638951	1.11144	0.226	0	0.594
6m	F	C03CA	Sulfonamides, plain	3679	179	25325	1652	-0.0929207	0.108149	-0.859195	0.911266	0.7372	1.12643	0.39	0	0.768
6m	F	C03DA	Aldosterone antagonists	3810	48	26452	525	-0.332881	0.18725	-1.77774	0.716855	0.496636	1.03473	0.0755	0	0.327
6m	F	C03EB	High-ceiling diuretics and potassium-sparing agents	3850	8	26944	33	0.50982	0.51661	0.986856	1.66499	0.604861	4.58319	0.324	0	0.724
6m	F	C05AX	Other agents for treatment of hemorrhoids and anal fissures for topical use	3829	29	26678	299	-0.53553	0.217879	-2.45792	0.585359	0.381906	0.897198	0.014	1	0.104
6m	F	C07AA	Beta blocking agents, non-selective	3826	32	26651	326	-0.289892	0.187775	-1.54383	0.748345	0.517918	1.08129	0.123	0	0.437
6m	F	C07AB	Beta blocking agents, selective	3460	398	22972	4005	-0.24745	0.0692913	-3.57116	0.780789	0.681633	0.89437	0.000356	1	0.0074
6m	F	C07AG	Alpha and beta blocking agents	3845	13	26881	96	-0.0213255	0.381081	-0.0559604	0.9789	0.463819	2.06599	0.955	0	0.974
6m	F	C08CA	Dihydropyridine derivatives [DG:DG01928]	3320	538	22493	4484	-0.0887885	0.0564871	-1.57184	0.915039	0.819136	1.02217	0.116	0	0.431
6m	F	C08DA	Phenylalkylamine derivatives	3849	9	26897	80	0.0825378	0.381554	0.21632	1.08604	0.514107	2.29424	0.829	0	0.971
6m	F	C08DB	Benzothiazepine derivatives	3833	25	26600	377	-0.62314	0.259006	-2.40589	0.536258	0.322774	0.89094	0.0161	1	0.11
6m	F	C09AA	ACE inhibitors, plain [DG:DG01501]	3355	503	22656	4321	-0.157171	0.0590729	-2.66062	0.854558	0.761126	0.959459	0.0078	1	0.0659
6m	F	C09CA	Angiotensin II receptor blockers, plain [DG:DG01495]	3571	287	24281	2696	-0.175277	0.0749865	-2.33745	0.839225	0.724514	0.972096	0.0194	1	0.122
6m	F	C09DX	Angiotensin II receptor blockers (ARBs), other combinations	3850	8	26919	58	-0.0842305	0.493153	-0.1708	0.919219	0.349647	2.41662	0.864	0	0.971
6m	F	C10AA	HMG CoA reductase inhibitors [DG:DG01660]	2751	1107	17425	9552	-0.0618756	0.0448102	-1.38084	0.94	0.860962	1.02629	0.167	0	0.512
6m	F	C10AB	Fibrates	3844	14	26820	157	-0.471321	0.366336	-1.28658	0.624177	0.304417	1.27981	0.198	0	0.573
6m	F	C10AC	Bile acid sequestrants	3849	9	26902	75	-0.0715112	0.373989	-0.191212	0.930986	0.447292	1.93774	0.848	0	0.971
6m	F	C10AX	Other lipid modifying agents	3819	39	26596	381	-0.0147162	0.191444	-0.0768693	0.985392	0.677087	1.43408	0.939	0	0.971
6m	F	D01AC	Imidazole and triazole derivatives	3743	115	26266	711	0.184651	0.115277	1.60179	1.2028	0.959543	1.50772	0.109	0	0.421
6m	F	D01AE	Other antifungals for topical use	3846	12	26857	120	-0.330908	0.32309	-1.0242	0.718271	0.381297	1.35305	0.306	0	0.715
6m	F	D01AX		3803	55	26618	359	0.172805	0.163566	1.05649	1.18863	0.862612	1.63788	0.291	0	0.695
6m	F	D01BA	Antifungals for systemic use	3849	9	26917	60	0.141197	0.359296	0.392982	1.15165	0.569477	2.32898	0.694	0	0.911
6m	F	D02AC	Soft paraffin and fat products	3813	45	26488	489	-0.281997	0.177591	-1.58791	0.754276	0.532548	1.06832	0.112	0	0.425
6m	F	D02AE	Carbamide products	3840	18	26834	143	0.0298649	0.280503	0.106469	1.03032	0.59456	1.78544	0.915	0	0.971
6m	F	D02AX	Other emollients and protectives	3631	227	25362	1615	0.096946	0.0846312	1.14551	1.1018	0.933388	1.3006	0.252	0	0.632
6m	F	D05AX	Other antipsoriatics for topical use	3836	22	26800	177	0.0484323	0.237088	0.20428	1.04962	0.659503	1.67052	0.838	0	0.971
6m	F	D06AX	Other antibiotics for topical use	3836	22	26771	206	-0.265876	0.243068	-1.09384	0.766534	0.476019	1.23435	0.274	0	0.678
6m	F	D06BA	Sulfonamides	3853	5	26967	10	2.05464	0.666057	3.08479	7.80405	2.11519	28.7933	0.00204	-1	0.0303
6m	F	D06BX	Other chemotherapeutics	3852	6	26899	78	-0.579562	0.420221	-1.37918	0.560144	0.245806	1.27646	0.168	0	0.512
6m	F	D07AA	Corticosteroids, weak (group I)	3830	28	26751	226	0.116359	0.201392	0.577775	1.1234	0.757012	1.66712	0.563	0	0.862
6m	F	D07AB	Corticosteroids, moderately potent (group II)	3832	26	26760	217	-0.0948631	0.228652	-0.414879	0.909497	0.580985	1.42377	0.678	0	0.908
6m	F	D07AC	Corticosteroids, potent (group III)	3776	82	26289	688	-0.0205086	0.127323	-0.161076	0.9797	0.763329	1.2574	0.872	0	0.971
6m	F	D07AD	Corticosteroids, very potent (group IV)	3833	25	26782	195	0.0729111	0.227878	0.319957	1.07563	0.688156	1.68129	0.749	0	0.962
6m	F	D07CA	Corticosteroids, weak, combinations with antibiotics	3844	14	26890	87	0.267719	0.318281	0.84114	1.30698	0.700385	2.43894	0.4	0	0.768
6m	F	D07CC	Corticosteroids, potent, combinations with antibiotics	3822	36	26779	198	0.212098	0.212604	0.997619	1.23627	0.814961	1.87538	0.319	0	0.724
6m	F	D07CD	Corticosteroids, very potent, combinations with antibiotics	3848	10	26917	60	0.0922073	0.394639	0.23365	1.09659	0.505958	2.37671	0.815	0	0.971
6m	F	D09AA	Medicated dressings with antiinfectives	3845	13	26921	56	0.60596	0.368235	1.64558	1.83301	0.890658	3.77241	0.0999	0	0.392
6m	F	D11AC	Medicated shampoos	3843	15	26883	94	-0.26326	0.359423	-0.73245	0.768542	0.379939	1.55461	0.464	0	0.804
6m	F	G01AF	Imidazole derivatives	3836	22	26804	173	-0.287536	0.264899	-1.08545	0.75011	0.446306	1.26071	0.278	0	0.68
6m	F	G03AC	Progestogens	3852	6	26948	29	-0.225813	0.412141	-0.547903	0.797867	0.355715	1.78961	0.584	0	0.866
6m	F	G03BA	3-oxoandrosten (4) derivatives	3841	17	26895	82	0.190499	0.295891	0.643815	1.20985	0.677423	2.16076	0.52	0	0.846
6m	F	G03CA	Natural and semisynthetic estrogens, plain	3747	111	25869	1108	-0.461743	0.0988763	-4.6699	0.630184	0.519159	0.764953	3.03e-06	1	0.000158
6m	F	G03DA	Pregnen (4) derivatives	3848	10	26927	50	-0.155492	0.304539	-0.510581	0.855994	0.471234	1.55491	0.61	0	0.869
6m	F	G03FA	Progestogens and estrogens, fixed combinations	3849	9	26928	49	-0.00940689	0.310218	-0.0303235	0.990637	0.53932	1.81963	0.976	0	0.99
6m	F	G03FB	Progestogens and estrogens, sequential preparations	3842	16	26920	57	0.194034	0.256565	0.756277	1.21414	0.734296	2.00754	0.45	0	0.803
6m	F	G04BD	Urinary antispasmodics	3762	96	26051	926	-0.121241	0.121983	-0.993914	0.88582	0.697444	1.12508	0.32	0	0.724
6m	F	G04BE	Drugs used in erectile dysfunction	3748	110	26265	712	0.0188035	0.112036	0.167835	1.01898	0.818083	1.26921	0.867	0	0.971
6m	F	G04CA	Alpha-adrenoreceptor antagonists	3844	14	26859	118	0.148272	0.300168	0.493964	1.15983	0.643992	2.08885	0.621	0	0.873
6m	F	G04CB	Testosterone-5-alpha reductase inhibitors	3793	65	26132	845	-0.46862	0.158012	-2.96572	0.625865	0.459172	0.853074	0.00302	1	0.0349
6m	F	H02AA	Mineralocorticoids	3847	11	26900	77	0.0432433	0.408038	0.105978	1.04419	0.469293	2.32336	0.916	0	0.971
6m	F	H02AB	Glucocorticoids	3670	188	25408	1569	-0.0484783	0.0920513	-0.526644	0.952678	0.795406	1.14105	0.598	0	0.866
6m	F	H02BX	Corticosteroids for systemic use, combinations	3853	5	26922	55	-0.156922	0.465632	-0.33701	0.85477	0.343153	2.12918	0.736	0	0.951
6m	F	H03AA	Thyroid hormones	3607	251	24575	2402	-0.222705	0.0728647	-3.05642	0.800351	0.693834	0.92322	0.00224	1	0.0311
6m	F	J01AA	Tetracyclines [DG:DG01197]	3673	185	25851	1126	0.268744	0.09114	2.94869	1.30832	1.09429	1.56421	0.00319	-1	0.035
6m	F	J01CA	Penicillins with extended spectrum [DG:DG01780]	3606	252	25554	1423	0.351807	0.077925	4.51469	1.42163	1.22027	1.65623	6.36e-06	-1	0.000265
6m	F	J01CE	Beta-lactamase sensitive penicillins [DG:DG01778]	3842	16	26802	175	-0.548604	0.283579	-1.93457	0.577756	0.3314	1.00725	0.053	0	0.263
6m	F	J01CF	Beta-lactamase resistant penicillins [DG:DG01779]	3728	130	26064	913	-0.0245051	0.109204	-0.224397	0.975793	0.78777	1.20869	0.822	0	0.971
6m	F	J01CR	Combinations of penicillins, incl. beta-lactamase inhibitors	3794	64	26483	494	-0.118843	0.152117	-0.781265	0.887947	0.659022	1.19639	0.435	0	0.8
6m	F	J01DB	First-generation cephalosporins [DG:DG01774]	3836	22	26702	275	-0.54327	0.275051	-1.97516	0.580846	0.338788	0.99585	0.0483	1	0.257
6m	F	J01EA	Trimethoprim and derivatives [DG:DG01581]	3810	48	26534	443	-0.161421	0.169586	-0.951853	0.850933	0.610292	1.18646	0.341	0	0.727
6m	F	J01EE	Combinations of sulfonamides and trimethoprim, incl. derivatives	3848	10	26905	72	-0.237287	0.409739	-0.579117	0.788765	0.353316	1.76089	0.562	0	0.862
6m	F	J01FA	Macrolides [DG:DG01551]	3775	83	26328	649	0.00325775	0.131227	0.0248253	1.00326	0.775728	1.29754	0.98	0	0.99
6m	F	J01FF	Lincosamides [DG:DG01578]	3852	6	26944	33	-0.0729177	0.638319	-0.114234	0.929677	0.266056	3.24857	0.909	0	0.971
6m	F	J01MA	Fluoroquinolones [DG:DG01549]	3837	21	26716	261	-0.707932	0.268517	-2.63645	0.492662	0.291057	0.833912	0.00838	1	0.0671
6m	F	J01XE	Nitrofuran derivatives	3699	159	25539	1438	-0.17553	0.092764	-1.89222	0.839012	0.699527	1.00631	0.0585	0	0.276
6m	F	J02AC	Triazole derivatives	3835	23	26811	166	-0.0676197	0.239773	-0.282015	0.934616	0.584158	1.49533	0.778	0	0.971
6m	F	J05AB	Nucleosides and nucleotides excl. reverse transcriptase inhibitors [DG:DG02840]	3825	33	26763	214	0.105647	0.196796	0.536833	1.11143	0.755722	1.63456	0.591	0	0.866
6m	F	L01BC	Pyrimidine analogues	3850	8	26887	90	0.00096522	0.347869	0.00277466	1.00097	0.506175	1.97942	0.998	0	0.998
6m	F	L02AE	Gonadotropin releasing hormone analogues	3845	13	26718	259	-1.24323	0.377281	-3.29523	0.288452	0.137695	0.604266	0.000984	1	0.0186
6m	F	L02BA	Anti-estrogens	3852	6	26880	97	-0.990395	0.397087	-2.49415	0.37143	0.170554	0.808893	0.0126	1	0.0973
6m	F	L02BG	Aromatase inhibitors [DG:DG01596]	3826	32	26643	334	-0.156203	0.183389	-0.851762	0.855385	0.597111	1.22537	0.394	0	0.768
6m	F	L04AA	Selective immunosuppressants	3849	9	26914	63	-0.0864739	0.397245	-0.217684	0.91716	0.421014	1.99799	0.828	0	0.971
6m	F	L04AX	Other immunosuppressants	3820	38	26649	328	0.0217129	0.181362	0.119721	1.02195	0.716222	1.45818	0.905	0	0.971
6m	F	M01AB	Acetic acid derivatives and related substances	3841	17	26856	121	-0.102369	0.263545	-0.38843	0.902697	0.538522	1.51314	0.698	0	0.911
6m	F	M01AE	Propionic acid derivatives	3731	127	25776	1201	-0.387976	0.0952035	-4.07523	0.678429	0.562942	0.817607	4.61e-05	1	0.00137
6m	F	M01AH	Coxibs	3846	12	26861	116	-0.434899	0.324678	-1.33947	0.64733	0.342569	1.22322	0.18	0	0.528
6m	F	M02AA	Antiinflammatory preparations, non-steroids for topical use	3683	175	25691	1286	0.118805	0.0952571	1.2472	1.12615	0.934351	1.35732	0.212	0	0.593
6m	F	M03BA	Carbamic acid esters	3853	5	26970	7	1.20565	0.7944	1.51769	3.33893	0.703698	15.8427	0.129	0	0.44
6m	F	M03BX	Other centrally acting agents	3842	16	26832	145	-0.0728441	0.266319	-0.273522	0.929746	0.551651	1.56698	0.784	0	0.971
6m	F	M04AA	Preparations inhibiting uric acid production	3736	122	26098	879	0.0207261	0.119623	0.173262	1.02094	0.807558	1.29071	0.862	0	0.971
6m	F	M04AC	Preparations with no effect on uric acid metabolism	3836	22	26830	147	-0.0383218	0.281545	-0.136112	0.962403	0.554238	1.67116	0.892	0	0.971
6m	F	M05BA	Bisphosphonates [DG:DG01600]	3753	105	25918	1059	-0.0841441	0.113914	-0.73866	0.919299	0.735341	1.14928	0.46	0	0.804
6m	F	M05BX	Other drugs affecting bone structure and mineralization	3851	7	26925	52	0.285378	0.465556	0.612983	1.33026	0.534122	3.31311	0.54	0	0.851
6m	F	N01BB	Amides	3836	22	26773	204	-0.200011	0.252123	-0.793308	0.818722	0.499482	1.342	0.428	0	0.794
6m	F	N01BX	Other local anesthetics	3851	7	26900	77	-0.602548	0.50356	-1.19657	0.547415	0.204018	1.46881	0.232	0	0.594
6m	F	N02AA	Natural opium alkaloids	3743	115	26022	955	-0.0746758	0.116261	-0.642312	0.928044	0.73893	1.16556	0.521	0	0.846
6m	F	N02AB	Phenylpiperidine derivatives	3845	13	26857	120	-0.156077	0.35873	-0.435082	0.855493	0.4235	1.72814	0.663	0	0.907
6m	F	N02AE	Oripavine derivatives	3817	41	26688	289	-0.0531494	0.220602	-0.240929	0.948238	0.615366	1.46117	0.81	0	0.971
6m	F	N02AJ	Opioids in combination with non-opioid analgesics	3636	222	25072	1905	-0.151938	0.0808655	-1.8789	0.859041	0.733126	1.00658	0.0603	0	0.279
6m	F	N02AX	Other opioids	3788	70	26227	750	-0.579729	0.155182	-3.73581	0.56005	0.413172	0.759142	0.000188	1	0.00433
6m	F	N02BE	Anilides	3250	608	22021	4956	-0.066862	0.0557139	-1.20009	0.935324	0.838565	1.04325	0.23	0	0.594
6m	F	N02BG	Other analgesics and antipyretics	3851	7	26916	61	-0.31121	0.494721	-0.629061	0.73256	0.277792	1.93182	0.529	0	0.848
6m	F	N02CC	Selective serotonin (5HT1) agonists [DG:DG01943]	3820	38	26712	265	-0.0202832	0.163095	-0.124364	0.979921	0.711801	1.34904	0.901	0	0.971
6m	F	N02CX	Other antimigraine preparations	3850	8	26908	69	-0.524609	0.427217	-1.22797	0.591787	0.256155	1.36718	0.22	0	0.593
6m	F	N03AB	Hydantoin derivatives	3848	10	26933	44	0.405597	0.421209	0.962936	1.5002	0.657054	3.42528	0.336	0	0.727
6m	F	N03AE	Benzodiazepine derivatives	3845	13	26874	103	-0.0763351	0.349519	-0.2184	0.926506	0.467009	1.83811	0.827	0	0.971
6m	F	N03AF	Carboxamide derivatives	3841	17	26821	156	-0.265887	0.306543	-0.867373	0.766526	0.420327	1.39787	0.386	0	0.768
6m	F	N03AG	Fatty acid derivatives	3837	21	26824	153	-0.180248	0.280185	-0.643318	0.835063	0.482187	1.44618	0.52	0	0.846
6m	F	N03AX	Other antiepileptics	3643	215	25019	1958	-0.379523	0.0882784	-4.29916	0.684188	0.575479	0.813432	1.72e-05	1	0.000596
6m	F	N04BA	Dopa and dopa derivatives	3820	38	26632	345	0.00295769	0.194551	0.0152027	1.00296	0.684977	1.46856	0.988	0	0.993
6m	F	N04BB	Adamantane derivatives	3853	5	26948	29	0.10031	0.599681	0.167272	1.10551	0.341267	3.58124	0.867	0	0.971
6m	F	N04BC	Dopamine agonists	3833	25	26781	196	0.126906	0.241736	0.524977	1.13531	0.706872	1.82343	0.6	0	0.866
6m	F	N04BD	Monoamine oxidase B inhibitors	3852	6	26902	75	-0.207249	0.43517	-0.476249	0.812817	0.346386	1.90733	0.634	0	0.879
6m	F	N05AB	Phenothiazines with piperazine structure	3825	33	26668	309	-0.165162	0.197852	-0.834774	0.847757	0.575245	1.24937	0.404	0	0.768
6m	F	N05AD	Butyrophenone derivatives [DG:DG01940]	3849	9	26933	44	0.273966	0.437702	0.625919	1.31517	0.557693	3.10148	0.531	0	0.848
6m	F	N05AH	Diazepines, oxazepines and thiazepines	3831	27	26779	198	-0.0204036	0.235323	-0.0867048	0.979803	0.617766	1.55401	0.931	0	0.971
6m	F	N05AN	Lithium	3853	5	26910	67	-0.664958	0.551654	-1.20539	0.514295	0.174432	1.51635	0.228	0	0.594
6m	F	N05AX	Other antipsychotics	3826	32	26857	120	0.768115	0.240456	3.1944	2.1557	1.34556	3.45361	0.0014	-1	0.0233
6m	F	N05BA	Benzodiazepine derivatives [DG:DG01914]	3766	92	26444	533	0.283002	0.126377	2.23935	1.32711	1.03593	1.70013	0.0251	-1	0.154
6m	F	N05BB	Diphenylmethane derivatives	3853	5	26933	44	-0.416155	0.553136	-0.752355	0.659578	0.223058	1.95036	0.452	0	0.803
6m	F	N05CD	Benzodiazepine derivatives	3808	50	26799	178	0.937352	0.185749	5.04633	2.55321	1.77407	3.67454	4.53e-07	-1	3.14e-05
6m	F	N05CF	Benzodiazepine related drugs	3790	68	26428	549	-0.014353	0.1414	-0.101506	0.98575	0.74714	1.30056	0.919	0	0.971
6m	F	N05CH	Melatonin receptor agonists	3852	6	26917	60	-0.267716	0.490937	-0.545316	0.765125	0.292301	2.00279	0.586	0	0.866
6m	F	N06AA	Non-selective monoamine reuptake inhibitors [DG:DG01730]	3673	185	25253	1724	-0.255442	0.0887314	-2.87882	0.774574	0.650926	0.92171	0.00399	1	0.0415
6m	F	N06AB	Selective serotonin reuptake inhibitors	3539	319	24623	2354	-0.106411	0.0714328	-1.48967	0.899055	0.781592	1.03417	0.136	0	0.45
6m	F	N06AX	Other antidepressants	3688	170	25758	1219	0.0263408	0.0975717	0.269963	1.02669	0.847975	1.24307	0.787	0	0.971
6m	F	N06DA	Anticholinesterases	3795	63	26683	294	0.677395	0.17206	3.93696	1.96874	1.40516	2.75837	8.27e-05	-1	0.00215
6m	F	N06DX	Other anti-dementia drugs	3794	64	26791	186	1.13874	0.182636	6.235	3.12282	2.18313	4.46697	4.58e-10	-1	4.76e-08
6m	F	N07BC	Drugs used in opioid dependence	3853	5	26963	14	1.23615	0.590464	2.09353	3.44235	1.08201	10.9516	0.0363	-1	0.204
6m	F	N07CA	Antivertigo preparations	3820	38	26727	250	0.198034	0.202398	0.978435	1.219	0.819816	1.81256	0.328	0	0.726
6m	F	P01AB	Nitroimidazole derivatives	3836	22	26838	139	0.0538943	0.240362	0.224221	1.05537	0.658872	1.69048	0.823	0	0.971
6m	F	P01BA	Aminoquinolines	3840	18	26820	157	-0.0618761	0.275944	-0.224234	0.939999	0.547312	1.61443	0.823	0	0.971
6m	F	P01BC	Methanolquinolines	3815	43	26514	463	-0.169953	0.201339	-0.844116	0.843704	0.568595	1.25192	0.399	0	0.768
6m	F	R01AC	Antiallergic agents, excl. corticosteroids	3851	7	26945	32	0.303444	0.466604	0.650324	1.35452	0.542743	3.38044	0.515	0	0.846
6m	F	R01AD	Corticosteroids	3696	162	25456	1521	-0.215542	0.0898382	-2.39922	0.806104	0.675955	0.961313	0.0164	1	0.11
6m	F	R01AX	Other nasal preparations	3853	5	26931	46	-0.370726	0.532986	-0.695564	0.690233	0.242828	1.96197	0.487	0	0.837
6m	F	R03AC	Selective beta-2-adrenoreceptor agonists	3524	334	24294	2683	-0.129264	0.0759552	-1.70184	0.878742	0.757192	1.01981	0.0888	0	0.356
6m	F	R03AK	Adrenergics in combination with corticosteroids or other drugs, excl. anticholinergics	3649	209	25334	1643	-0.0641038	0.0936031	-0.684848	0.937908	0.780696	1.12678	0.493	0	0.841
6m	F	R03AL	Adrenergics in combination with anticholinergics incl. triple combinations with corticosteroids	3822	36	26659	318	-0.0180916	0.229624	-0.0787876	0.982071	0.62615	1.54031	0.937	0	0.971
6m	F	R03BA	Glucocorticoids	3745	113	26108	869	-0.110401	0.110787	-0.996516	0.895475	0.720688	1.11265	0.319	0	0.724
6m	F	R03BB	Anticholinergics	3794	64	26307	670	-0.322329	0.180149	-1.78924	0.72446	0.508938	1.03125	0.0736	0	0.327
6m	F	R03DA	Xanthines	3848	10	26896	81	0.0404703	0.435452	0.0929385	1.0413	0.44351	2.44483	0.926	0	0.971
6m	F	R03DC	Leukotriene receptor antagonists	3827	31	26655	322	-0.490933	0.221469	-2.21671	0.612055	0.396523	0.94474	0.0267	1	0.158
6m	F	R05CB	Mucolytics	3808	50	26481	496	-0.0919833	0.193243	-0.475997	0.91212	0.624535	1.33213	0.634	0	0.879
6m	F	R05DA	Opium alkaloids and derivatives	3756	102	25940	1037	-0.370875	0.11652	-3.18294	0.69013	0.549219	0.867195	0.00146	1	0.0233
6m	F	R06AB	Substituted alkylamines	3845	13	26872	105	0.0725485	0.330698	0.21938	1.07524	0.562349	2.05593	0.826	0	0.971
6m	F	R06AD	Phenothiazine derivatives	3844	14	26885	92	0.0232434	0.328329	0.0707929	1.02352	0.537786	1.94796	0.944	0	0.971
6m	F	R06AE	Piperazine derivatives	3723	135	26169	808	0.292746	0.1075	2.72322	1.3401	1.0855	1.65442	0.00647	-1	0.0641
6m	F	R06AX	Other antihistamines for systemic use	3762	96	26174	803	-0.120288	0.115739	-1.0393	0.886665	0.706706	1.11245	0.299	0	0.706
6m	F	S01AA	Antibiotics	3818	40	26725	252	0.116343	0.198133	0.587194	1.12338	0.761849	1.65648	0.557	0	0.862
6m	F	S01BA	Corticosteroids, plain	3851	7	26833	144	-0.651041	0.382333	-1.70281	0.521503	0.246491	1.10334	0.0886	0	0.356
6m	F	S01EC	Carbonic anhydrase inhibitors	3838	20	26665	312	-0.532702	0.259417	-2.05346	0.587017	0.353041	0.976057	0.04	1	0.219
6m	F	S01ED	Beta blocking agents	3830	28	26576	401	-0.583419	0.219706	-2.65546	0.557987	0.362746	0.858313	0.00792	1	0.0659
6m	F	S01EE	Prostaglandin analogues	3803	55	26322	655	-0.208761	0.152106	-1.37247	0.811589	0.602362	1.09349	0.17	0	0.512
6m	F	S01GX	Other antiallergics	3837	21	26814	163	-0.195559	0.256573	-0.762195	0.822375	0.497354	1.3598	0.446	0	0.803
6m	F	S01XA	Other ophthalmologicals	3712	146	25340	1637	-0.262676	0.0979896	-2.68065	0.768991	0.634613	0.931823	0.00735	1	0.0659
6m	F	S02AA	Antiinfectives	3852	6	26907	70	-0.814668	0.525255	-1.551	0.442786	0.158154	1.23968	0.121	0	0.437
6m	F	S02CA	Corticosteroids and antiinfectives in combination	3852	6	26928	49	-0.181811	0.433433	-0.419468	0.833759	0.356522	1.94982	0.675	0	0.908
6m	F	V03AE	Drugs for treatment of hyperkalemia and hyperphosphatemia	3849	9	26918	59	-0.338809	0.57565	-0.588567	0.712619	0.230592	2.20227	0.556	0	0.862
6m	F	V06DC	Carbohydrates	3848	10	26931	46	0.456777	0.50071	0.912258	1.57898	0.591771	4.21306	0.362	0	0.742
6m	F	V07AY	Other non-therapeutic auxiliary products	3754	104	26198	779	-0.16914	0.13668	-1.23748	0.844391	0.645947	1.1038	0.216	0	0.593
6m	G	A01AB	Antiinfectives and antiseptics for local oral treatment	1286	32	26575	402	0.55235	0.20216	2.73224	1.73733	1.16895	2.58208	0.00629	-1	0.0503
6m	G	A01AD	Other agents for local oral treatment	1306	12	26861	116	0.654227	0.355844	1.83852	1.92366	0.957678	3.86398	0.066	0	0.234
6m	G	A02BA	H2-receptor antagonists [DG:DG01481]	1283	35	26386	591	0.0690986	0.213099	0.324256	1.07154	0.705686	1.62707	0.746	0	0.863
6m	G	A02BC	Proton pump inhibitors [DG:DG01646]	925	393	17691	9286	-0.353462	0.0724149	-4.88106	0.702253	0.609328	0.809349	1.06e-06	1	2.08e-05
6m	G	A02BX	Other drugs for peptic ulcer and gastro-oesophageal reflux disease (GORD)	1271	47	26190	787	0.08958	0.183437	0.488343	1.09371	0.763407	1.56694	0.625	0	0.779
6m	G	A03AA	Synthetic anticholinergics, esters with tertiary amino group	1305	13	26650	327	-0.248015	0.322824	-0.768267	0.780348	0.414465	1.46923	0.442	0	0.666
6m	G	A03AX	Other drugs for functional gastrointestinal disorders	1313	5	26828	149	-0.570302	0.567643	-1.00468	0.565355	0.185833	1.71997	0.315	0	0.56
6m	G	A03BB	Belladonna alkaloids, semisynthetic, quaternary ammonium compounds	1285	33	26607	370	0.641152	0.204607	3.13358	1.89867	1.27139	2.83542	0.00173	-1	0.017
6m	G	A03FA	Propulsives [DG:DG01763]	1295	23	26694	283	0.463475	0.247055	1.876	1.58959	0.97945	2.5798	0.0607	0	0.228
6m	G	A04AA	Serotonin (5HT3) antagonists	1313	5	26892	85	0.556138	0.447264	1.24342	1.74392	0.72577	4.19041	0.214	0	0.444
6m	G	A06AA	Softeners, emollients	1251	67	26392	585	0.829641	0.160421	5.17163	2.2925	1.67398	3.13953	2.34e-07	-1	6.9e-06
6m	G	A06AB	Contact laxatives	1210	108	26155	822	0.893655	0.132177	6.76107	2.44405	1.88623	3.16682	1.4e-11	-1	8.26e-10
6m	G	A06AC	Bulk-forming laxatives	1312	6	26797	180	-0.317612	0.468075	-0.678548	0.727885	0.290817	1.82182	0.497	0	0.716
6m	G	A06AD	Osmotically acting laxatives	1165	153	24878	2099	0.495302	0.102638	4.82572	1.64099	1.34195	2.00667	1.4e-06	-1	2.48e-05
6m	G	A06AG	Enemas	1312	6	26929	48	0.627229	0.557099	1.12588	1.87241	0.628316	5.5799	0.26	0	0.492
6m	G	A06AX	Other drugs for constipation	1309	9	26843	134	0.0865607	0.446363	0.193924	1.09042	0.454602	2.6155	0.846	0	0.908
6m	G	A07AA	Antibiotics	1297	21	26766	211	0.606547	0.281719	2.15302	1.83409	1.05587	3.18589	0.0313	-1	0.15
6m	G	A07DA	Antipropulsives	1285	33	26513	464	0.226174	0.227778	0.992957	1.25379	0.802292	1.95938	0.321	0	0.562
6m	G	A07EC	Aminosalicylic acid and similar agents	1302	16	26657	320	0.0759159	0.282707	0.268532	1.07887	0.619897	1.87767	0.788	0	0.872
6m	G	A10AB	Insulins and analogues for injection, fast-acting	1238	80	26049	928	0.17611	0.182464	0.965172	1.19257	0.833994	1.70531	0.335	0	0.58
6m	G	A10AC	Insulins and analogues for injection, intermediate-acting	1305	13	26843	134	0.161762	0.438476	0.36892	1.17558	0.497743	2.77652	0.712	0	0.842
6m	G	A10AD	Insulins and analogues for injection, intermediate- or long-acting combined with fast-acting	1291	27	26767	210	0.258886	0.329817	0.784939	1.29549	0.678704	2.47278	0.432	0	0.666
6m	G	A10AE	Insulins and analogues for injection, long-acting	1296	22	26650	327	-0.247849	0.325029	-0.762545	0.780478	0.412747	1.47583	0.446	0	0.666
6m	G	A10BA	Biguanides [DG:DG01684]	1196	122	25112	1865	-0.14777	0.144474	-1.02281	0.862629	0.649893	1.145	0.306	0	0.56
6m	G	A10BB	Sulfonylureas	1286	32	26379	598	-0.319488	0.244285	-1.30785	0.726521	0.450094	1.17272	0.191	0	0.417
6m	G	A10BH	Dipeptidyl peptidase 4 (DPP-4) inhibitors [DG:DG01601]	1283	35	26443	534	-0.210494	0.248375	-0.847486	0.810184	0.497917	1.31829	0.397	0	0.65
6m	G	A10BJ	Glucagon-like peptide-1 receptor (GLP-1) analogues	1309	9	26813	164	-0.765586	0.531224	-1.44117	0.465061	0.164177	1.31737	0.149	0	0.378
6m	G	A10BK	Sodium-glucose co-transporter 2 (SGLT2) inhibitors	1298	20	26729	248	0.112722	0.287055	0.392683	1.11932	0.637679	1.96475	0.695	0	0.831
6m	G	A11CC	Vitamin D and analogues	1272	46	26290	687	0.125998	0.193927	0.649718	1.13428	0.775607	1.65882	0.516	0	0.719
6m	G	A11DA	Vitamin B1, plain	1289	29	26709	268	0.685458	0.252011	2.71995	1.98468	1.21107	3.25246	0.00653	-1	0.0503
6m	G	A11EX	Vitamin B-complex, other combinations	1313	5	26845	132	-0.410596	0.566093	-0.725315	0.663255	0.218676	2.01169	0.468	0	0.68
6m	G	A12AX	Calcium, combinations with vitamin D and/or other drugs	1161	157	24103	2874	0.0253261	0.108545	0.233324	1.02565	0.82909	1.26881	0.816	0	0.891
6m	G	B01AA	Vitamin K antagonists	1288	30	26338	639	-0.210834	0.257479	-0.81884	0.809908	0.488945	1.34157	0.413	0	0.664
6m	G	B01AB	Heparin group	1310	8	26858	119	0.227006	0.414019	0.548297	1.25484	0.557389	2.82498	0.584	0	0.75
6m	G	B01AC	Platelet aggregation inhibitors excl. heparin	1112	206	23000	3977	-0.232442	0.106266	-2.18737	0.792596	0.643568	0.976133	0.0287	1	0.145
6m	G	B01AF	Direct factor Xa inhibitors	1201	117	24925	2052	0.107521	0.125228	0.858603	1.11351	0.871158	1.4233	0.391	0	0.646
6m	G	B03AA	Iron bivalent, oral preparations	1240	78	26001	976	0.226979	0.159815	1.42026	1.2548	0.91735	1.71639	0.155	0	0.388
6m	G	B03BA	Vitamin B12 (cyanocobalamin and analogues)	1268	50	26279	698	0.330839	0.177329	1.86567	1.39214	0.983404	1.97075	0.0621	0	0.229
6m	G	B03BB	Folic acid and derivatives	1245	73	26049	928	0.259074	0.164598	1.57398	1.29573	0.938432	1.78906	0.116	0	0.325
6m	G	B05CB	Salt solutions	1310	8	26903	74	0.683847	0.447108	1.52949	1.98149	0.824889	4.75978	0.126	0	0.342
6m	G	B05XA	Electrolyte solutions	1313	5	26888	89	-0.484094	0.749556	-0.645842	0.616255	0.141811	2.678	0.518	0	0.719
6m	G	C01AA	Digitalis glycosides [DG:DG01697]	1303	15	26619	358	-0.102778	0.342158	-0.300383	0.902327	0.46143	1.7645	0.764	0	0.872
6m	G	C01CA	Adrenergic and dopaminergic agents	1312	6	26906	71	0.784393	0.431864	1.8163	2.19108	0.939807	5.10831	0.0693	0	0.238
6m	G	C01DA	Organic nitrates	1250	68	25901	1076	-0.0798195	0.183208	-0.435677	0.923283	0.644735	1.32217	0.663	0	0.811
6m	G	C01DX	Other vasodilators used in cardiac diseases	1305	13	26777	200	-0.185329	0.427416	-0.433602	0.830831	0.359484	1.9202	0.665	0	0.811
6m	G	C01EB	Other cardiac preparations	1309	9	26806	171	-0.0644182	0.444717	-0.144852	0.937613	0.39216	2.24173	0.885	0	0.932
6m	G	C02CA	Alpha-adrenoreceptor antagonists	1283	35	26195	782	-0.405809	0.225899	-1.79642	0.666437	0.428022	1.03765	0.0724	0	0.24
6m	G	C03AA	Thiazides, plain [DG:DG01749]	1274	44	26021	956	-0.100883	0.184691	-0.546224	0.904039	0.629465	1.29838	0.585	0	0.75
6m	G	C03BA	Sulfonamides, plain	1282	36	26335	642	-0.0754973	0.213101	-0.354279	0.927282	0.610677	1.40803	0.723	0	0.842
6m	G	C03CA	Sulfonamides, plain	1200	118	25325	1652	0.18425	0.13978	1.31814	1.20232	0.914181	1.58127	0.188	0	0.417
6m	G	C03DA	Aldosterone antagonists	1291	27	26452	525	-0.205157	0.262855	-0.780496	0.814519	0.486574	1.36349	0.435	0	0.666
6m	G	C05AX	Other agents for treatment of hemorrhoids and anal fissures for topical use	1305	13	26678	299	-0.456468	0.358642	-1.27277	0.633517	0.313667	1.27952	0.203	0	0.433
6m	G	C07AA	Beta blocking agents, non-selective	1303	15	26651	326	0.209443	0.260226	0.804849	1.23299	0.740364	2.0534	0.421	0	0.666
6m	G	C07AB	Beta blocking agents, selective	1132	186	22972	4005	-0.271937	0.107139	-2.53816	0.761903	0.617587	0.939941	0.0112	1	0.0789
6m	G	C07AG	Alpha and beta blocking agents	1310	8	26881	96	0.133729	0.510417	0.262	1.14308	0.420331	3.1086	0.793	0	0.872
6m	G	C08CA	Dihydropyridine derivatives [DG:DG01928]	1103	215	22493	4484	-0.229813	0.0929402	-2.4727	0.794682	0.662337	0.953471	0.0134	1	0.0848
6m	G	C08DB	Benzothiazepine derivatives	1307	11	26600	377	-0.652783	0.386896	-1.68723	0.520595	0.243871	1.11132	0.0916	0	0.27
6m	G	C09AA	ACE inhibitors, plain [DG:DG01501]	1132	186	22656	4321	-0.386733	0.100173	-3.86063	0.679273	0.558178	0.826638	0.000113	1	0.00154
6m	G	C09CA	Angiotensin II receptor blockers, plain [DG:DG01495]	1208	110	24281	2696	-0.330825	0.122655	-2.69719	0.718331	0.564828	0.913553	0.007	1	0.0516
6m	G	C10AA	HMG CoA reductase inhibitors [DG:DG01660]	895	423	17425	9552	-0.422274	0.0757922	-5.57147	0.655554	0.565056	0.760547	2.55e-08	1	9.03e-07
6m	G	C10AB	Fibrates	1309	9	26820	157	-0.0502501	0.441418	-0.113838	0.950992	0.400337	2.25906	0.909	0	0.952
6m	G	C10AX	Other lipid modifying agents	1300	18	26596	381	-0.202397	0.305127	-0.663319	0.816771	0.449122	1.48537	0.507	0	0.719
6m	G	D01AC	Imidazole and triazole derivatives	1259	59	26266	711	0.285041	0.170822	1.66864	1.32982	0.95144	1.85867	0.0952	0	0.276
6m	G	D01AE	Other antifungals for topical use	1312	6	26857	120	0.0323217	0.439612	0.0735232	1.03285	0.436337	2.44485	0.941	0	0.969
6m	G	D01AX		1285	33	26618	359	0.532533	0.214271	2.48532	1.70324	1.11913	2.59222	0.0129	-1	0.0848
6m	G	D01BA	Antifungals for systemic use	1312	6	26917	60	0.886653	0.439464	2.01758	2.42699	1.02561	5.74324	0.0436	-1	0.184
6m	G	D02AC	Soft paraffin and fat products	1298	20	26488	489	-0.380688	0.287578	-1.32377	0.683391	0.388931	1.20079	0.186	0	0.417
6m	G	D02AE	Carbamide products	1308	10	26834	143	0.24593	0.387316	0.63496	1.27881	0.59856	2.73215	0.525	0	0.721
6m	G	D02AX	Other emollients and protectives	1197	121	25362	1615	0.265085	0.121739	2.17749	1.30354	1.02683	1.65483	0.0295	-1	0.145
6m	G	D05AX	Other antipsoriatics for topical use	1310	8	26800	177	0.0746943	0.374239	0.19959	1.07755	0.517455	2.24391	0.842	0	0.908
6m	G	D06AX	Other antibiotics for topical use	1308	10	26771	206	-0.157932	0.385684	-0.409486	0.853908	0.400961	1.81853	0.682	0	0.821
6m	G	D07AA	Corticosteroids, weak (group I)	1303	15	26751	226	0.335642	0.296974	1.13021	1.39884	0.781577	2.50359	0.258	0	0.492
6m	G	D07AB	Corticosteroids, moderately potent (group II)	1300	18	26760	217	0.642922	0.269178	2.38846	1.90203	1.12223	3.22368	0.0169	-1	0.103
6m	G	D07AC	Corticosteroids, potent (group III)	1279	39	26289	688	0.0702591	0.196381	0.357769	1.07279	0.730039	1.57645	0.721	0	0.842
6m	G	D07AD	Corticosteroids, very potent (group IV)	1305	13	26782	195	0.465085	0.305184	1.52395	1.59215	0.875386	2.8958	0.128	0	0.342
6m	G	D07CA	Corticosteroids, weak, combinations with antibiotics	1309	9	26890	87	0.771276	0.391501	1.97005	2.16252	1.00392	4.65823	0.0488	-1	0.201
6m	G	D07CC	Corticosteroids, potent, combinations with antibiotics	1303	15	26779	198	9.58e-05	0.368813	0.000259709	1.0001	0.485394	2.06058	1	0	1
6m	G	D09AA	Medicated dressings with antiinfectives	1312	6	26921	56	0.841553	0.492001	1.71047	2.31997	0.884448	6.08543	0.0872	0	0.262
6m	G	D11AC	Medicated shampoos	1312	6	26883	94	-0.58153	0.661178	-0.879536	0.559042	0.152977	2.04298	0.379	0	0.633
6m	G	G01AF	Imidazole derivatives	1304	14	26804	173	0.342306	0.34122	1.00318	1.40819	0.721443	2.74866	0.316	0	0.56
6m	G	G03BA	3-oxoandrosten (4) derivatives	1312	6	26895	82	0.0208413	0.49973	0.0417052	1.02106	0.383409	2.71919	0.967	0	0.978
6m	G	G03CA	Natural and semisynthetic estrogens, plain	1284	34	25869	1108	-0.359217	0.185483	-1.93666	0.698223	0.485404	1.00435	0.0528	0	0.209
6m	G	G04BD	Urinary antispasmodics	1280	38	26051	926	-0.269984	0.199069	-1.35623	0.763392	0.516764	1.12772	0.175	0	0.411
6m	G	G04BE	Drugs used in erectile dysfunction	1273	45	26265	712	0.0819815	0.172374	0.475602	1.08544	0.774235	1.52172	0.634	0	0.785
6m	G	G04CA	Alpha-adrenoreceptor antagonists	1311	7	26859	118	0.048033	0.454833	0.105606	1.04921	0.430219	2.55877	0.916	0	0.954
6m	G	G04CB	Testosterone-5-alpha reductase inhibitors	1286	32	26132	845	-0.520371	0.235326	-2.21128	0.5943	0.374703	0.942592	0.027	1	0.141
6m	G	H02AA	Mineralocorticoids	1312	6	26900	77	0.206762	0.577944	0.357755	1.22969	0.396121	3.81736	0.721	0	0.842
6m	G	H02AB	Glucocorticoids	1196	122	25408	1569	0.561821	0.117992	4.7615	1.75386	1.39173	2.21022	1.93e-06	-1	2.85e-05
6m	G	H03AA	Thyroid hormones	1237	81	24575	2402	-0.40879	0.13289	-3.07615	0.664454	0.512087	0.862156	0.0021	1	0.0196
6m	G	J01AA	Tetracyclines [DG:DG01197]	1198	120	25851	1126	0.882467	0.117155	7.5325	2.41686	1.92099	3.04072	5.13e-14	-1	4.54e-12
6m	G	J01CA	Penicillins with extended spectrum [DG:DG01780]	1161	157	25554	1423	0.975826	0.0996655	9.79102	2.65336	2.18251	3.22578	1.34e-22	-1	2.37e-20
6m	G	J01CE	Beta-lactamase sensitive penicillins [DG:DG01778]	1310	8	26802	175	-0.20998	0.420609	-0.499227	0.810601	0.355442	1.84861	0.618	0	0.775
6m	G	J01CF	Beta-lactamase resistant penicillins [DG:DG01779]	1239	79	26064	913	0.503356	0.141979	3.54527	1.65426	1.25241	2.18506	0.000393	-1	0.00435
6m	G	J01CR	Combinations of penicillins, incl. beta-lactamase inhibitors	1273	45	26483	494	0.536314	0.185376	2.89312	1.70969	1.18883	2.45877	0.00382	-1	0.0322
6m	G	J01DB	First-generation cephalosporins [DG:DG01774]	1303	15	26702	275	0.0182752	0.338393	0.054006	1.01844	0.524668	1.97692	0.957	0	0.978
6m	G	J01EA	Trimethoprim and derivatives [DG:DG01581]	1288	30	26534	443	0.296485	0.220599	1.344	1.34512	0.87293	2.07274	0.179	0	0.411
6m	G	J01EE	Combinations of sulfonamides and trimethoprim, incl. derivatives	1312	6	26905	72	0.375624	0.50678	0.741199	1.4559	0.53919	3.93117	0.459	0	0.676
6m	G	J01FA	Macrolides [DG:DG01551]	1265	53	26328	649	0.583337	0.165295	3.52906	1.79201	1.29609	2.47768	0.000418	-1	0.00435
6m	G	J01FF	Lincosamides [DG:DG01578]	1313	5	26944	33	0.554151	0.729741	0.75938	1.74046	0.416372	7.27525	0.448	0	0.666
6m	G	J01MA	Fluoroquinolones [DG:DG01549]	1304	14	26716	261	-0.0914604	0.330876	-0.276419	0.912597	0.477117	1.74555	0.782	0	0.872
6m	G	J01XE	Nitrofuran derivatives	1234	84	25539	1438	0.234136	0.129124	1.81326	1.26382	0.981225	1.62779	0.0698	0	0.238
6m	G	J02AC	Triazole derivatives	1306	12	26811	166	0.452946	0.32835	1.37946	1.57294	0.826434	2.99375	0.168	0	0.407
6m	G	J05AB	Nucleosides and nucleotides excl. reverse transcriptase inhibitors [DG:DG02840]	1303	15	26763	214	0.428582	0.291187	1.47185	1.53508	0.867484	2.71644	0.141	0	0.373
6m	G	L01BC	Pyrimidine analogues	1312	6	26887	90	0.821248	0.401515	2.04537	2.27333	1.03485	4.994	0.0408	-1	0.181
6m	G	L02AE	Gonadotropin releasing hormone analogues	1307	11	26718	259	-0.542192	0.412429	-1.31463	0.581472	0.259092	1.30498	0.189	0	0.417
6m	G	L02BG	Aromatase inhibitors [DG:DG01596]	1309	9	26643	334	-0.364119	0.357892	-1.0174	0.694809	0.344519	1.40125	0.309	0	0.56
6m	G	L04AA	Selective immunosuppressants	1312	6	26914	63	0.580653	0.489539	1.18612	1.78721	0.684637	4.6654	0.236	0	0.458
6m	G	L04AX	Other immunosuppressants	1305	13	26649	328	-0.210377	0.326766	-0.643816	0.810278	0.42705	1.53741	0.52	0	0.719
6m	G	M01AB	Acetic acid derivatives and related substances	1311	7	26856	121	0.170625	0.405332	0.420951	1.18605	0.53588	2.62504	0.674	0	0.817
6m	G	M01AE	Propionic acid derivatives	1271	47	25776	1201	-0.286521	0.160747	-1.78243	0.750871	0.547938	1.02896	0.0747	0	0.24
6m	G	M01AH	Coxibs	1312	6	26861	116	0.139171	0.437859	0.317845	1.14932	0.487213	2.71121	0.751	0	0.863
6m	G	M02AA	Antiinflammatory preparations, non-steroids for topical use	1233	85	25691	1286	0.191215	0.140388	1.36204	1.21072	0.919475	1.59422	0.173	0	0.411
6m	G	M03BX	Other centrally acting agents	1306	12	26832	145	0.697502	0.311506	2.23913	2.00873	1.09083	3.69902	0.0252	-1	0.136
6m	G	M04AA	Preparations inhibiting uric acid production	1265	53	26098	879	-0.172757	0.196204	-0.880497	0.841342	0.572738	1.23592	0.379	0	0.633
6m	G	M04AC	Preparations with no effect on uric acid metabolism	1307	11	26830	147	0.0859407	0.410304	0.209456	1.08974	0.487593	2.43551	0.834	0	0.906
6m	G	M05BA	Bisphosphonates [DG:DG01600]	1262	56	25918	1059	0.184953	0.16462	1.12351	1.20316	0.871351	1.66133	0.261	0	0.492
6m	G	N01BB	Amides	1304	14	26773	204	0.37541	0.30641	1.22519	1.45559	0.798381	2.65379	0.221	0	0.444
6m	G	N01BX	Other local anesthetics	1313	5	26900	77	-0.4076	0.70988	-0.574181	0.665245	0.165464	2.6746	0.566	0	0.741
6m	G	N02AA	Natural opium alkaloids	1230	88	26022	955	0.651319	0.135801	4.79614	1.91807	1.46983	2.50301	1.63e-06	-1	2.62e-05
6m	G	N02AB	Phenylpiperidine derivatives	1308	10	26857	120	0.500838	0.406171	1.23307	1.6501	0.744326	3.65813	0.218	0	0.444
6m	G	N02AE	Oripavine derivatives	1294	24	26688	289	0.221739	0.28865	0.768192	1.24825	0.708908	2.19791	0.442	0	0.666
6m	G	N02AJ	Opioids in combination with non-opioid analgesics	1217	101	25072	1905	-0.0343867	0.124748	-0.275649	0.966198	0.756616	1.23383	0.783	0	0.872
6m	G	N02AX	Other opioids	1282	36	26227	750	-0.388538	0.224665	-1.72941	0.678047	0.436532	1.05318	0.0838	0	0.256
6m	G	N02BE	Anilides	1004	314	22021	4956	0.183739	0.0821436	2.2368	1.2017	1.02299	1.41163	0.0253	-1	0.136
6m	G	N02BG	Other analgesics and antipyretics	1312	6	26916	61	0.569722	0.518115	1.0996	1.76777	0.640306	4.88052	0.272	0	0.506
6m	G	N02CC	Selective serotonin (5HT1) agonists [DG:DG01943]	1311	7	26712	265	-0.46209	0.374248	-1.23472	0.629966	0.302512	1.31187	0.217	0	0.444
6m	G	N03AB	Hydantoin derivatives	1313	5	26933	44	0.704182	0.572522	1.22997	2.02219	0.65837	6.21119	0.219	0	0.444
6m	G	N03AF	Carboxamide derivatives	1307	11	26821	156	0.228104	0.383789	0.594346	1.25622	0.592063	2.66539	0.552	0	0.734
6m	G	N03AG	Fatty acid derivatives	1309	9	26824	153	-0.503073	0.50203	-1.00208	0.60467	0.226033	1.61758	0.316	0	0.56
6m	G	N03AX	Other antiepileptics	1186	132	25019	1958	0.0987233	0.118498	0.833122	1.10376	0.874994	1.39234	0.405	0	0.657
6m	G	N04BA	Dopa and dopa derivatives	1294	24	26632	345	0.48156	0.238002	2.02335	1.6186	1.01518	2.58068	0.043	-1	0.184
6m	G	N04BB	Adamantane derivatives	1313	5	26948	29	1.14194	0.600024	1.90316	3.13284	0.966441	10.1555	0.057	0	0.219
6m	G	N04BC	Dopamine agonists	1303	15	26781	196	0.391571	0.32973	1.18755	1.4793	0.775137	2.82317	0.235	0	0.458
6m	G	N04BD	Monoamine oxidase B inhibitors	1312	6	26902	75	0.806264	0.436469	1.84724	2.23953	0.951957	5.26859	0.0647	0	0.234
6m	G	N05AB	Phenothiazines with piperazine structure	1295	23	26668	309	0.553775	0.233377	2.37288	1.73981	1.10114	2.74891	0.0177	-1	0.104
6m	G	N05AD	Butyrophenone derivatives [DG:DG01940]	1310	8	26933	44	0.937569	0.484755	1.93411	2.55377	0.987505	6.60424	0.0531	0	0.209
6m	G	N05AH	Diazepines, oxazepines and thiazepines	1308	10	26779	198	-0.10133	0.378294	-0.267859	0.903635	0.430502	1.89675	0.789	0	0.872
6m	G	N05AX	Other antipsychotics	1298	20	26857	120	1.11324	0.296213	3.75825	3.04421	1.70344	5.4403	0.000171	-1	0.00217
6m	G	N05BA	Benzodiazepine derivatives [DG:DG01914]	1272	46	26444	533	0.637399	0.174425	3.65428	1.89155	1.34382	2.66254	0.000258	-1	0.00305
6m	G	N05CD	Benzodiazepine derivatives	1285	33	26799	178	1.42278	0.220419	6.45487	4.14862	2.69324	6.39047	1.1e-10	-1	4.87e-09
6m	G	N05CF	Benzodiazepine related drugs	1288	30	26428	549	0.111062	0.214229	0.518425	1.11746	0.7343	1.70057	0.604	0	0.764
6m	G	N05CH	Melatonin receptor agonists	1313	5	26917	60	0.487722	0.540642	0.902117	1.6286	0.564417	4.69926	0.367	0	0.625
6m	G	N06AA	Non-selective monoamine reuptake inhibitors [DG:DG01730]	1236	82	25253	1724	-0.0998373	0.137875	-0.724116	0.904985	0.69068	1.18578	0.469	0	0.68
6m	G	N06AB	Selective serotonin reuptake inhibitors	1200	118	24623	2354	-0.070486	0.119662	-0.589044	0.931941	0.737102	1.17828	0.556	0	0.734
6m	G	N06AX	Other antidepressants	1234	84	25758	1219	0.295012	0.140328	2.10231	1.34314	1.02016	1.76838	0.0355	-1	0.166
6m	G	N06DA	Anticholinesterases	1289	29	26683	294	0.732162	0.242502	3.0192	2.07957	1.29285	3.34503	0.00254	-1	0.0225
6m	G	N06DX	Other anti-dementia drugs	1287	31	26791	186	1.2275	0.244718	5.01599	3.4127	2.11244	5.51329	5.31e-07	-1	1.34e-05
6m	G	N07CA	Antivertigo preparations	1301	17	26727	250	-0.0582401	0.349668	-0.166558	0.943423	0.475396	1.87222	0.868	0	0.92
6m	G	P01AB	Nitroimidazole derivatives	1306	12	26838	139	0.658482	0.315306	2.08839	1.93186	1.0413	3.58406	0.0368	-1	0.167
6m	G	P01BA	Aminoquinolines	1308	10	26820	157	0.239705	0.382203	0.627166	1.27087	0.600837	2.68812	0.531	0	0.722
6m	G	P01BC	Methanolquinolines	1292	26	26514	463	0.0487929	0.260643	0.187202	1.05	0.629972	1.75009	0.852	0	0.908
6m	G	R01AD	Corticosteroids	1260	58	25456	1521	-0.271689	0.153021	-1.7755	0.762091	0.564611	1.02864	0.0758	0	0.24
6m	G	R01AX	Other nasal preparations	1313	5	26931	46	0.685208	0.534092	1.28294	1.98418	0.696535	5.65225	0.2	0	0.431
6m	G	R03AC	Selective beta-2-adrenoreceptor agonists	1163	155	24294	2683	0.108005	0.118598	0.910683	1.11405	0.88298	1.4056	0.362	0	0.623
6m	G	R03AK	Adrenergics in combination with corticosteroids or other drugs, excl. anticholinergics	1229	89	25334	1643	-0.007015	0.151251	-0.0463799	0.99301	0.738249	1.33568	0.963	0	0.978
6m	G	R03AL	Adrenergics in combination with anticholinergics incl. triple combinations with corticosteroids	1293	25	26659	318	0.407664	0.282596	1.44257	1.5033	0.863952	2.61579	0.149	0	0.378
6m	G	R03BA	Glucocorticoids	1287	31	26108	869	-0.380012	0.213394	-1.7808	0.683853	0.450105	1.03899	0.075	0	0.24
6m	G	R03BB	Anticholinergics	1285	33	26307	670	-0.323248	0.266807	-1.21155	0.723794	0.429041	1.22104	0.226	0	0.449
6m	G	R03DA	Xanthines	1313	5	26896	81	-0.426823	0.750578	-0.568659	0.652579	0.149869	2.84154	0.57	0	0.741
6m	G	R03DC	Leukotriene receptor antagonists	1307	11	26655	322	-0.601558	0.380561	-1.58071	0.547957	0.259896	1.1553	0.114	0	0.325
6m	G	R05CB	Mucolytics	1286	32	26481	496	0.198455	0.250579	0.791985	1.21952	0.746252	1.99292	0.428	0	0.666
6m	G	R05DA	Opium alkaloids and derivatives	1265	53	25940	1037	0.0849529	0.159871	0.531385	1.08867	0.795805	1.4893	0.595	0	0.758
6m	G	R06AB	Substituted alkylamines	1308	10	26872	105	0.690821	0.390865	1.76742	1.99535	0.927472	4.29278	0.0772	0	0.24
6m	G	R06AD	Phenothiazine derivatives	1308	10	26885	92	0.608603	0.396778	1.53386	1.83786	0.844424	4.00005	0.125	0	0.342
6m	G	R06AE	Piperazine derivatives	1236	82	26169	808	0.705623	0.141976	4.97	2.02511	1.53318	2.67488	6.73e-07	-1	1.49e-05
6m	G	R06AX	Other antihistamines for systemic use	1280	38	26174	803	-0.113772	0.192237	-0.591831	0.892462	0.61228	1.30086	0.554	0	0.734
6m	G	S01AA	Antibiotics	1295	23	26725	252	0.396418	0.274128	1.44611	1.48649	0.868589	2.54396	0.148	0	0.378
6m	G	S01BA	Corticosteroids, plain	1312	6	26833	144	0.0134292	0.437713	0.0306804	1.01352	0.429768	2.39018	0.976	0	0.981
6m	G	S01EC	Carbonic anhydrase inhibitors	1308	10	26665	312	-0.5512	0.394718	-1.39644	0.576258	0.265839	1.24915	0.163	0	0.4
6m	G	S01ED	Beta blocking agents	1309	9	26576	401	-0.94924	0.406913	-2.33278	0.387035	0.174329	0.859271	0.0197	1	0.112
6m	G	S01EE	Prostaglandin analogues	1298	20	26322	655	-0.72335	0.291172	-2.48427	0.485124	0.274155	0.85844	0.013	1	0.0848
6m	G	S01GX	Other antiallergics	1308	10	26814	163	-0.115522	0.399054	-0.28949	0.890901	0.407511	1.94769	0.772	0	0.872
6m	G	S01XA	Other ophthalmologicals	1248	70	25340	1637	-0.198965	0.147904	-1.34522	0.819579	0.613323	1.0952	0.179	0	0.411
6m	G	S02AA	Antiinfectives	1313	5	26907	70	-0.0563384	0.615288	-0.0915643	0.945219	0.282993	3.15711	0.927	0	0.96
6m	G	V03AE	Drugs for treatment of hyperkalemia and hyperphosphatemia	1309	9	26918	59	0.378647	0.587758	0.644222	1.46031	0.461447	4.62132	0.519	0	0.719
6m	G	V06DC	Carbohydrates	1312	6	26931	46	0.53626	0.670393	0.799918	1.7096	0.459442	6.36149	0.424	0	0.666
6m	G	V07AY	Other non-therapeutic auxiliary products	1256	62	26198	779	0.109589	0.186093	0.588893	1.11582	0.774791	1.60695	0.556	0	0.734
6m	H	A02BA	H2-receptor antagonists [DG:DG01481]	162	8	26386	591	0.637297	0.447982	1.4226	1.89136	0.786023	4.55108	0.155	0	0.269
6m	H	A02BC	Proton pump inhibitors [DG:DG01646]	107	63	17691	9286	-0.0546413	0.193703	-0.282088	0.946825	0.647712	1.38407	0.778	0	0.871
6m	H	A02BX	Other drugs for peptic ulcer and gastro-oesophageal reflux disease (GORD)	161	9	26190	787	0.644151	0.38813	1.65963	1.90437	0.889938	4.07514	0.097	0	0.204
6m	H	A03BB	Belladonna alkaloids, semisynthetic, quaternary ammonium compounds	152	18	26607	370	2.2843	0.298128	7.66216	9.81885	5.47372	17.6132	1.89e-14	-1	5.29e-13
6m	H	A03FA	Propulsives [DG:DG01763]	162	8	26694	283	1.49325	0.428593	3.48407	4.45153	1.92165	10.312	0.000495	-1	0.00208
6m	H	A06AA	Softeners, emollients	158	12	26392	585	1.1488	0.34813	3.29991	3.1544	1.59431	6.24106	0.000968	-1	0.00387
6m	H	A06AB	Contact laxatives	136	34	26155	822	1.73389	0.242845	7.13989	5.66264	3.51803	9.11462	9.58e-13	-1	2.01e-11
6m	H	A06AD	Osmotically acting laxatives	131	39	24878	2099	1.02857	0.217332	4.73272	2.79707	1.82684	4.28257	2.23e-06	-1	1.87e-05
6m	H	A07AA	Antibiotics	165	5	26766	211	1.35163	0.593598	2.27701	3.86371	1.20701	12.368	0.0228	-1	0.0547
6m	H	A07DA	Antipropulsives	164	6	26513	464	0.646139	0.496955	1.30019	1.90816	0.720421	5.05409	0.194	0	0.307
6m	H	A10AB	Insulins and analogues for injection, fast-acting	153	17	26049	928	0.979291	0.411093	2.38216	2.66257	1.18949	5.9599	0.0172	-1	0.0425
6m	H	A10AD	Insulins and analogues for injection, intermediate- or long-acting combined with fast-acting	165	5	26767	210	0.564297	0.718524	0.785356	1.75821	0.429967	7.18964	0.432	0	0.567
6m	H	A10AE	Insulins and analogues for injection, long-acting	163	7	26650	327	0.672522	0.604672	1.11221	1.95917	0.598896	6.40905	0.266	0	0.385
6m	H	A10BA	Biguanides [DG:DG01684]	154	16	25112	1865	-0.323456	0.396732	-0.8153	0.723644	0.332515	1.57485	0.415	0	0.553
6m	H	A10BB	Sulfonylureas	164	6	26379	598	-0.394839	0.625907	-0.630827	0.673788	0.197573	2.29784	0.528	0	0.634
6m	H	A10BH	Dipeptidyl peptidase 4 (DPP-4) inhibitors [DG:DG01601]	163	7	26443	534	-0.279703	0.628263	-0.4452	0.756009	0.22066	2.59018	0.656	0	0.745
6m	H	A11CC	Vitamin D and analogues	161	9	26290	687	0.658832	0.412118	1.59865	1.93253	0.861621	4.33449	0.11	0	0.217
6m	H	A11DA	Vitamin B1, plain	161	9	26709	268	1.75026	0.420943	4.15796	5.75612	2.52236	13.1357	3.22e-05	-1	0.000208
6m	H	A12AX	Calcium, combinations with vitamin D and/or other drugs	144	26	24103	2874	0.314286	0.265318	1.18456	1.36928	0.814035	2.30325	0.236	0	0.36
6m	H	B01AC	Platelet aggregation inhibitors excl. heparin	131	39	23000	3977	0.0206154	0.240036	0.0858847	1.02083	0.637712	1.63411	0.932	0	0.958
6m	H	B01AF	Direct factor Xa inhibitors	145	25	24925	2052	0.375783	0.265321	1.41633	1.45613	0.865663	2.44936	0.157	0	0.269
6m	H	B03AA	Iron bivalent, oral preparations	152	18	26001	976	0.781419	0.325706	2.39916	2.18457	1.15375	4.13637	0.0164	-1	0.0418
6m	H	B03BA	Vitamin B12 (cyanocobalamin and analogues)	162	8	26279	698	0.507103	0.431367	1.17557	1.66047	0.712912	3.86748	0.24	0	0.36
6m	H	B03BB	Folic acid and derivatives	151	19	26049	928	0.93217	0.316113	2.94885	2.54001	1.36694	4.71981	0.00319	-1	0.0107
6m	H	C01AA	Digitalis glycosides [DG:DG01697]	164	6	26619	358	0.673568	0.503771	1.33705	1.96122	0.73063	5.26449	0.181	0	0.293
6m	H	C01DA	Organic nitrates	161	9	25901	1076	0.0884042	0.403214	0.219249	1.09243	0.495634	2.40783	0.827	0	0.889
6m	H	C02CA	Alpha-adrenoreceptor antagonists	164	6	26195	782	-0.479939	0.543459	-0.88312	0.618821	0.213281	1.79547	0.377	0	0.52
6m	H	C03AA	Thiazides, plain [DG:DG01749]	162	8	26021	956	0.0301725	0.423029	0.071325	1.03063	0.449785	2.36158	0.943	0	0.958
6m	H	C03BA	Sulfonamides, plain	159	11	26335	642	0.656087	0.408395	1.6065	1.92724	0.865551	4.29118	0.108	0	0.217
6m	H	C03CA	Sulfonamides, plain	145	25	25325	1652	0.412808	0.29111	1.41805	1.51105	0.854035	2.67353	0.156	0	0.269
6m	H	C07AB	Beta blocking agents, selective	130	40	22972	4005	0.171326	0.234374	0.730992	1.18688	0.749717	1.87895	0.465	0	0.592
6m	H	C08CA	Dihydropyridine derivatives [DG:DG01928]	135	35	22493	4484	-0.210504	0.238539	-0.88247	0.810176	0.507605	1.2931	0.378	0	0.52
6m	H	C09AA	ACE inhibitors, plain [DG:DG01501]	139	31	22656	4321	-0.428426	0.256933	-1.66747	0.651534	0.393755	1.07807	0.0954	0	0.204
6m	H	C09CA	Angiotensin II receptor blockers, plain [DG:DG01495]	150	20	24281	2696	-0.157796	0.288342	-0.547253	0.854024	0.485313	1.50286	0.584	0	0.682
6m	H	C10AA	HMG CoA reductase inhibitors [DG:DG01660]	95	75	17425	9552	-0.267754	0.194579	-1.37607	0.765096	0.522496	1.12034	0.169	0	0.278
6m	H	D01AC	Imidazole and triazole derivatives	153	17	26266	711	0.929997	0.340346	2.73251	2.5345	1.3007	4.93865	0.00629	-1	0.0196
6m	H	D01AX		163	7	26618	359	1.03199	0.427279	2.41526	2.80664	1.2147	6.48491	0.0157	-1	0.0413
6m	H	D02AE	Carbamide products	165	5	26834	143	1.25244	0.600142	2.08691	3.49887	1.0791	11.3447	0.0369	-1	0.0861
6m	H	D02AX	Other emollients and protectives	138	32	25362	1615	1.04365	0.239038	4.36604	2.83956	1.77735	4.53659	1.27e-05	-1	8.89e-05
6m	H	D07AC	Corticosteroids, potent (group III)	161	9	26289	688	0.612174	0.409563	1.4947	1.84444	0.82647	4.11624	0.135	0	0.247
6m	H	G04BD	Urinary antispasmodics	161	9	26051	926	0.260035	0.394883	0.658513	1.29698	0.598125	2.81236	0.51	0	0.621
6m	H	G04BE	Drugs used in erectile dysfunction	162	8	26265	712	0.560323	0.404886	1.3839	1.75124	0.791936	3.87258	0.166	0	0.278
6m	H	G04CA	Alpha-adrenoreceptor antagonists	165	5	26859	118	1.60449	0.535505	2.99622	4.97534	1.74172	14.2123	0.00274	-1	0.00958
6m	H	G04CB	Testosterone-5-alpha reductase inhibitors	164	6	26132	845	-0.919777	0.586885	-1.56722	0.398608	0.126173	1.25929	0.117	0	0.219
6m	H	H02AB	Glucocorticoids	144	26	25408	1569	1.09247	0.270453	4.03942	2.98164	1.75483	5.06612	5.37e-05	-1	0.000311
6m	H	H03AA	Thyroid hormones	151	19	24575	2402	0.240293	0.31109	0.772423	1.27162	0.691108	2.33976	0.44	0	0.568
6m	H	J01AA	Tetracyclines [DG:DG01197]	148	22	25851	1126	1.41188	0.273288	5.16627	4.10366	2.40181	7.01141	2.41e-07	-1	3.37e-06
6m	H	J01CA	Penicillins with extended spectrum [DG:DG01780]	136	34	25554	1423	1.53667	0.22699	6.7698	4.6491	2.97952	7.25423	1.32e-11	-1	2.22e-10
6m	H	J01CF	Beta-lactamase resistant penicillins [DG:DG01779]	149	21	26064	913	1.1161	0.296002	3.7706	3.05294	1.70903	5.45364	0.000163	-1	0.000762
6m	H	J01CR	Combinations of penicillins, incl. beta-lactamase inhibitors	160	10	26483	494	1.06296	0.414971	2.56152	2.89492	1.2835	6.52944	0.0104	-1	0.0292
6m	H	J01EA	Trimethoprim and derivatives [DG:DG01581]	163	7	26534	443	0.144504	0.569029	0.253948	1.15547	0.378771	3.52483	0.799	0	0.884
6m	H	J01FA	Macrolides [DG:DG01551]	159	11	26328	649	1.01625	0.379588	2.67724	2.76281	1.3129	5.81395	0.00743	-1	0.0215
6m	H	J01XE	Nitrofuran derivatives	150	20	25539	1438	0.782025	0.280039	2.79256	2.18589	1.26255	3.78451	0.00523	-1	0.0169
6m	H	M01AE	Propionic acid derivatives	163	7	25776	1201	0.276481	0.413552	0.668551	1.31848	0.586195	2.96556	0.504	0	0.621
6m	H	M02AA	Antiinflammatory preparations, non-steroids for topical use	153	17	25691	1286	0.489979	0.30962	1.58252	1.63228	0.889682	2.99472	0.114	0	0.217
6m	H	M04AA	Preparations inhibiting uric acid production	161	9	26098	879	-0.308936	0.500321	-0.617475	0.734228	0.275383	1.9576	0.537	0	0.635
6m	H	M05BA	Bisphosphonates [DG:DG01600]	153	17	25918	1059	1.0995	0.30261	3.6334	3.00268	1.65926	5.43379	0.00028	-1	0.00124
6m	H	N02AA	Natural opium alkaloids	136	34	26022	955	1.94799	0.235765	8.26244	7.0146	4.41886	11.1351	1.49e-16	-1	6.26e-15
6m	H	N02AE	Oripavine derivatives	159	11	26688	289	1.35973	0.432845	3.14138	3.89514	1.66751	9.09867	0.00168	-1	0.00615
6m	H	N02AJ	Opioids in combination with non-opioid analgesics	151	19	25072	1905	0.318032	0.302166	1.05251	1.37442	0.760158	2.48505	0.293	0	0.417
6m	H	N02AX	Other opioids	165	5	26227	750	-0.0536964	0.557514	-0.0963141	0.94772	0.317762	2.82656	0.923	0	0.958
6m	H	N02BE	Anilides	96	74	22021	4956	0.939422	0.193994	4.84253	2.5585	1.74924	3.74215	1.29e-06	-1	1.35e-05
6m	H	N03AX	Other antiepileptics	139	31	25019	1958	0.841722	0.257682	3.26651	2.32036	1.40025	3.84507	0.00109	-1	0.00416
6m	H	N04BA	Dopa and dopa derivatives	163	7	26632	345	0.842123	0.443523	1.89871	2.32129	0.973161	5.53699	0.0576	0	0.131
6m	H	N05AD	Butyrophenone derivatives [DG:DG01940]	164	6	26933	44	2.37978	0.590334	4.03125	10.8026	3.39634	34.3591	5.56e-05	-1	0.000311
6m	H	N05AX	Other antipsychotics	162	8	26857	120	2.10447	0.444178	4.73789	8.20274	3.43445	19.5912	2.17e-06	-1	1.87e-05
6m	H	N05BA	Benzodiazepine derivatives [DG:DG01914]	155	15	26444	533	1.64583	0.323441	5.08852	5.18534	2.75075	9.77468	3.63e-07	-1	4.36e-06
6m	H	N05CD	Benzodiazepine derivatives	145	25	26799	178	3.12685	0.283817	11.0171	22.802	13.0731	39.7713	3.63e-28	-1	3.05e-26
6m	H	N06AA	Non-selective monoamine reuptake inhibitors [DG:DG01730]	159	11	25253	1724	0.0259199	0.385236	0.0672832	1.02626	0.482313	2.18366	0.946	0	0.958
6m	H	N06AB	Selective serotonin reuptake inhibitors	150	20	24623	2354	0.37784	0.308874	1.22328	1.45913	0.796467	2.67313	0.221	0	0.344
6m	H	N06AX	Other antidepressants	155	15	25758	1219	0.843751	0.314563	2.68229	2.32507	1.25507	4.3073	0.00732	-1	0.0215
6m	H	N06DA	Anticholinesterases	160	10	26683	294	1.0357	0.411759	2.5153	2.81708	1.25688	6.314	0.0119	-1	0.0322
6m	H	N06DX	Other anti-dementia drugs	157	13	26791	186	1.70669	0.38147	4.47399	5.51072	2.60907	11.6394	7.71e-06	-1	5.89e-05
6m	H	R01AD	Corticosteroids	164	6	25456	1521	-0.415056	0.478052	-0.868223	0.660303	0.258706	1.68531	0.385	0	0.522
6m	H	R03AC	Selective beta-2-adrenoreceptor agonists	149	21	24294	2683	0.184584	0.361522	0.510574	1.20272	0.592136	2.4429	0.61	0	0.702
6m	H	R03AK	Adrenergics in combination with corticosteroids or other drugs, excl. anticholinergics	160	10	25334	1643	-0.102014	0.491832	-0.207416	0.903017	0.344373	2.3679	0.836	0	0.889
6m	H	R03AL	Adrenergics in combination with anticholinergics incl. triple combinations with corticosteroids	164	6	26659	318	0.70822	0.616483	1.14881	2.03037	0.606459	6.79752	0.251	0	0.369
6m	H	R05CB	Mucolytics	162	8	26481	496	0.788132	0.497022	1.58571	2.19928	0.830227	5.82593	0.113	0	0.217
6m	H	R05DA	Opium alkaloids and derivatives	162	8	25940	1037	-0.0120035	0.448626	-0.0267561	0.988068	0.410109	2.38054	0.979	0	0.979
6m	H	R06AE	Piperazine derivatives	154	16	26169	808	1.23704	0.313463	3.94635	3.44539	1.86383	6.36899	7.96e-05	-1	0.000418
6m	H	R06AX	Other antihistamines for systemic use	165	5	26174	803	-0.131676	0.608078	-0.216545	0.876625	0.266191	2.88691	0.829	0	0.889
6m	H	S01AA	Antibiotics	160	10	26725	252	1.61986	0.425452	3.80739	5.0524	2.1945	11.6321	0.000141	-1	0.000695
6m	H	S01XA	Other ophthalmologicals	159	11	25340	1637	-0.273496	0.390879	-0.699694	0.760716	0.353583	1.63664	0.484	0	0.607
6m	H	V07AY	Other non-therapeutic auxiliary products	156	14	26198	779	0.710181	0.409142	1.73578	2.03436	0.912325	4.53634	0.0826	0	0.183
1yrs	A	A01AB	Antiinfectives and antiseptics for local oral treatment	1266	52	2466	74	0.224554	0.201398	1.11498	1.25176	0.843409	1.85784	0.265	0	0.561
1yrs	A	A01AD	Other agents for local oral treatment	1301	17	2525	15	0.323902	0.400959	0.807817	1.38251	0.629889	3.0344	0.419	0	0.667
1yrs	A	A02BA	H2-receptor antagonists [DG:DG01481]	1262	56	2499	41	0.45209	0.239797	1.8853	1.57159	0.98211	2.5149	0.0595	0	0.207
1yrs	A	A02BC	Proton pump inhibitors [DG:DG01646]	862	456	1748	792	-0.257357	0.0846289	-3.04101	0.773092	0.654896	0.912621	0.00237	1	0.0178
1yrs	A	A02BX	Other drugs for peptic ulcer and gastro-oesophageal reflux disease (GORD)	1260	58	2455	85	-0.243353	0.207673	-1.17181	0.783995	0.521778	1.17799	0.241	0	0.543
1yrs	A	A03AA	Synthetic anticholinergics, esters with tertiary amino group	1299	19	2512	28	0.0580627	0.337347	0.172115	1.05978	0.546985	2.05332	0.863	0	0.921
1yrs	A	A03AX	Other drugs for functional gastrointestinal disorders	1312	6	2527	13	-0.577714	0.608591	-0.949265	0.56118	0.170179	1.85054	0.343	0	0.617
1yrs	A	A03BB	Belladonna alkaloids, semisynthetic, quaternary ammonium compounds	1274	44	2507	33	0.710323	0.257488	2.75866	2.03465	1.22813	3.3708	0.00583	-1	0.042
1yrs	A	A03FA	Propulsives [DG:DG01763]	1289	29	2532	8	2.02629	0.464975	4.35785	7.5859	3.04856	18.8764	1.35e-05	-1	0.000347
1yrs	A	A06AA	Softeners, emollients	1243	75	2510	30	1.36319	0.276291	4.93387	3.90863	2.27389	6.71859	8.4e-07	-1	2.93e-05
1yrs	A	A06AB	Contact laxatives	1189	129	2476	64	0.959996	0.195754	4.90409	2.61169	1.77927	3.83354	9.78e-07	-1	2.93e-05
1yrs	A	A06AC	Bulk-forming laxatives	1309	9	2530	10	-0.0761194	0.531032	-0.143342	0.926706	0.327178	2.62482	0.886	0	0.933
1yrs	A	A06AD	Osmotically acting laxatives	1101	217	2393	147	0.918504	0.136253	6.74114	2.50554	1.91816	3.27278	1.81e-11	-1	1.63e-09
1yrs	A	A06AG	Enemas	1309	9	2532	8	0.471583	0.583363	0.808388	1.60253	0.510611	5.02947	0.419	0	0.667
1yrs	A	A06AX	Other drugs for constipation	1309	9	2535	5	0.440071	0.612023	0.719044	1.55282	0.467736	5.15513	0.472	0	0.692
1yrs	A	A07AA	Antibiotics	1284	34	2520	20	0.722118	0.332977	2.16867	2.05879	1.07175	3.95487	0.0302	-1	0.123
1yrs	A	A07DA	Antipropulsives	1274	44	2513	27	0.575249	0.283809	2.02689	1.77757	1.019	3.10086	0.0427	-1	0.164
1yrs	A	A07EC	Aminosalicylic acid and similar agents	1300	18	2520	20	0.475891	0.369521	1.28786	1.60945	0.779903	3.32134	0.198	0	0.509
1yrs	A	A08AB	Peripherally acting antiobesity products	1313	5	2535	5	0.624435	0.732714	0.852222	1.86719	0.44392	7.85367	0.394	0	0.652
1yrs	A	A09AB	Acid preparations	1313	5	2534	6	-0.224416	0.71017	-0.316003	0.798983	0.19854	3.21534	0.752	0	0.865
1yrs	A	A10AB	Insulins and analogues for injection, fast-acting	1220	98	2470	70	0.291622	0.241068	1.20971	1.3386	0.834426	2.1474	0.227	0	0.524
1yrs	A	A10AC	Insulins and analogues for injection, intermediate-acting	1305	13	2533	7	0.141673	0.682892	0.20746	1.1522	0.30204	4.39532	0.836	0	0.906
1yrs	A	A10AD	Insulins and analogues for injection, intermediate- or long-acting combined with fast-acting	1288	30	2528	12	0.0504973	0.478496	0.105533	1.05179	0.411629	2.68754	0.916	0	0.948
1yrs	A	A10AE	Insulins and analogues for injection, long-acting	1292	26	2529	11	0.559349	0.506205	1.10499	1.74953	0.648491	4.71998	0.269	0	0.563
1yrs	A	A10BA	Biguanides [DG:DG01684]	1178	140	2367	173	-0.444842	0.184637	-2.40928	0.640925	0.446266	0.920493	0.016	1	0.0874
1yrs	A	A10BB	Sulfonylureas	1279	39	2482	58	-0.424208	0.29199	-1.45282	0.654288	0.369104	1.15982	0.146	0	0.412
1yrs	A	A10BD	Combinations of oral blood glucose lowering drugs	1312	6	2535	5	0.28806	0.716869	0.40183	1.33384	0.327122	5.4387	0.688	0	0.827
1yrs	A	A10BG	Thiazolidinediones [DG:DG01683]	1313	5	2535	5	-0.801978	0.874149	-0.917439	0.448441	0.0807967	2.48896	0.359	0	0.64
1yrs	A	A10BH	Dipeptidyl peptidase 4 (DPP-4) inhibitors [DG:DG01601]	1276	42	2494	46	-0.371759	0.310477	-1.19738	0.68952	0.375133	1.26739	0.231	0	0.527
1yrs	A	A10BJ	Glucagon-like peptide-1 receptor (GLP-1) analogues	1309	9	2521	19	-1.15477	0.633934	-1.82159	0.315131	0.0909315	1.09211	0.0686	0	0.229
1yrs	A	A10BK	Sodium-glucose co-transporter 2 (SGLT2) inhibitors	1296	22	2505	35	-0.243357	0.351322	-0.692689	0.783992	0.393706	1.56117	0.488	0	0.698
1yrs	A	A11CC	Vitamin D and analogues	1243	75	2471	69	0.486251	0.206534	2.35434	1.62621	1.08472	2.438	0.0186	-1	0.095
1yrs	A	A11DA	Vitamin B1, plain	1283	35	2534	6	2.16395	0.586386	3.69032	8.70546	2.75741	27.4841	0.000227	-1	0.00293
1yrs	A	A12AA	Calcium	1310	8	2530	10	-0.48123	0.597852	-0.804931	0.618023	0.191404	1.99553	0.421	0	0.667
1yrs	A	A12AX	Calcium, combinations with vitamin D and/or other drugs	1136	182	2362	178	0.220953	0.137188	1.61059	1.24727	0.953119	1.63219	0.107	0	0.339
1yrs	A	B01AA	Vitamin K antagonists	1279	39	2506	34	0.350311	0.309961	1.13018	1.41951	0.773064	2.60652	0.259	0	0.561
1yrs	A	B01AB	Heparin group	1309	9	2534	6	0.675048	0.5884	1.14726	1.96413	0.619675	6.22551	0.251	0	0.552
1yrs	A	B01AC	Platelet aggregation inhibitors excl. heparin	1087	231	2275	265	-0.231863	0.134379	-1.72544	0.793054	0.609373	1.0321	0.0845	0	0.272
1yrs	A	B01AF	Direct factor Xa inhibitors	1197	121	2435	105	0.358581	0.170294	2.10566	1.4313	1.02501	1.99862	0.0353	-1	0.138
1yrs	A	B03AA	Iron bivalent, oral preparations	1219	99	2487	53	0.796004	0.218143	3.64901	2.21666	1.4453	3.39971	0.000267	-1	0.0032
1yrs	A	B03BA	Vitamin B12 (cyanocobalamin and analogues)	1247	71	2464	76	0.1863	0.205122	0.90824	1.20478	0.805849	1.80121	0.364	0	0.642
1yrs	A	B03BB	Folic acid and derivatives	1223	95	2467	73	0.351421	0.200053	1.75664	1.42109	0.960022	2.10358	0.0791	0	0.259
1yrs	A	B05CB	Salt solutions	1303	15	2530	10	0.390963	0.506857	0.771347	1.4784	0.547292	3.99362	0.441	0	0.678
1yrs	A	C01AA	Digitalis glycosides [DG:DG01697]	1302	16	2519	21	-0.0974199	0.456668	-0.213328	0.907175	0.370554	2.22091	0.831	0	0.906
1yrs	A	C01DA	Organic nitrates	1224	94	2457	83	0.0941152	0.219791	0.428203	1.09869	0.714049	1.69052	0.668	0	0.824
1yrs	A	C01DX	Other vasodilators used in cardiac diseases	1305	13	2535	5	0.306851	0.742148	0.413463	1.35914	0.31721	5.82345	0.679	0	0.827
1yrs	A	C01EB	Other cardiac preparations	1308	10	2523	17	-0.666803	0.551694	-1.20865	0.513347	0.174045	1.51413	0.227	0	0.524
1yrs	A	C02CA	Alpha-adrenoreceptor antagonists	1272	46	2488	52	-0.209797	0.257827	-0.81371	0.810749	0.489051	1.34406	0.416	0	0.667
1yrs	A	C03AA	Thiazides, plain [DG:DG01749]	1264	54	2462	78	-0.218855	0.217168	-1.00777	0.803438	0.524857	1.22989	0.314	0	0.604
1yrs	A	C03BA	Sulfonamides, plain	1275	43	2492	48	0.0815353	0.261058	0.312326	1.08495	0.65032	1.81006	0.755	0	0.865
1yrs	A	C03CA	Sulfonamides, plain	1174	144	2462	78	0.705876	0.191326	3.68938	2.02562	1.39203	2.94759	0.000228	-1	0.00293
1yrs	A	C03DA	Aldosterone antagonists	1289	29	2515	25	0.117228	0.351947	0.333085	1.12438	0.563948	2.24173	0.739	0	0.858
1yrs	A	C05AX	Other agents for treatment of hemorrhoids and anal fissures for topical use	1295	23	2510	30	0.0270688	0.335456	0.0806925	1.02744	0.532261	1.98329	0.936	0	0.962
1yrs	A	C07AA	Beta blocking agents, non-selective	1299	19	2510	30	0.663498	0.299201	2.21757	1.94157	1.07992	3.49071	0.0266	-1	0.12
1yrs	A	C07AB	Beta blocking agents, selective	1104	214	2302	238	0.0152118	0.133695	0.11378	1.01533	0.781212	1.3196	0.909	0	0.948
1yrs	A	C07AG	Alpha and beta blocking agents	1310	8	2535	5	0.56123	0.759569	0.73888	1.75283	0.395356	7.77122	0.46	0	0.69
1yrs	A	C08CA	Dihydropyridine derivatives [DG:DG01928]	1066	252	2159	381	-0.259785	0.110699	-2.34677	0.771218	0.620755	0.95815	0.019	1	0.095
1yrs	A	C08DB	Benzothiazepine derivatives	1307	11	2520	20	-0.47948	0.483246	-0.992206	0.619105	0.240046	1.59674	0.321	0	0.604
1yrs	A	C09AA	ACE inhibitors, plain [DG:DG01501]	1098	220	2172	368	-0.385028	0.118341	-3.25355	0.680432	0.539537	0.85812	0.00115	1	0.0103
1yrs	A	C09CA	Angiotensin II receptor blockers, plain [DG:DG01495]	1195	123	2338	202	-0.348106	0.14914	-2.3341	0.706024	0.527026	0.945818	0.0196	1	0.0955
1yrs	A	C10AA	HMG CoA reductase inhibitors [DG:DG01660]	854	464	1746	794	-0.69099	0.0943172	-7.32623	0.50108	0.416484	0.602858	2.87e-13	1	5.17e-11
1yrs	A	C10AB	Fibrates	1308	10	2534	6	0.452583	0.720253	0.628367	1.57237	0.383072	6.45399	0.53	0	0.732
1yrs	A	C10AC	Bile acid sequestrants	1312	6	2533	7	0.67964	0.607953	1.11792	1.97317	0.599115	6.49857	0.264	0	0.561
1yrs	A	C10AX	Other lipid modifying agents	1297	21	2516	24	-0.159351	0.370149	-0.430505	0.852697	0.41269	1.76184	0.667	0	0.824
1yrs	A	D01AC	Imidazole and triazole derivatives	1213	105	2427	113	0.169819	0.166272	1.02133	1.18509	0.855413	1.64183	0.307	0	0.604
1yrs	A	D01AE	Other antifungals for topical use	1299	19	2519	21	0.280445	0.375085	0.747684	1.32372	0.634486	2.76166	0.455	0	0.69
1yrs	A	D01AX		1273	45	2506	34	0.517187	0.265806	1.94573	1.6773	0.99606	2.82447	0.0518	0	0.19
1yrs	A	D01BA	Antifungals for systemic use	1306	12	2521	19	0.453909	0.364807	1.24424	1.57445	0.77003	3.21923	0.213	0	0.523
1yrs	A	D02AC	Soft paraffin and fat products	1287	31	2503	37	-0.125454	0.306657	-0.409102	0.882096	0.483511	1.60926	0.682	0	0.827
1yrs	A	D02AE	Carbamide products	1306	12	2526	14	0.0302637	0.470048	0.0643842	1.03073	0.410121	2.59045	0.949	0	0.969
1yrs	A	D02AX	Other emollients and protectives	1137	181	2366	174	0.212956	0.136739	1.55739	1.23733	0.94636	1.61776	0.119	0	0.365
1yrs	A	D05AX	Other antipsoriatics for topical use	1301	17	2515	25	-0.105668	0.367975	-0.28716	0.899724	0.43731	1.8511	0.774	0	0.882
1yrs	A	D06AX	Other antibiotics for topical use	1295	23	2509	31	0.0532782	0.312302	0.170598	1.05472	0.571771	1.9456	0.865	0	0.921
1yrs	A	D06BB	Antivirals	1313	5	2534	6	0.350143	0.669911	0.52267	1.41927	0.381642	5.27806	0.601	0	0.784
1yrs	A	D07AA	Corticosteroids, weak (group I)	1281	37	2512	28	0.608538	0.276911	2.19759	1.83774	1.06783	3.16276	0.028	-1	0.123
1yrs	A	D07AB	Corticosteroids, moderately potent (group II)	1284	34	2516	24	1.01243	0.302571	3.3461	2.75229	1.52077	4.9811	0.000828	-1	0.00784
1yrs	A	D07AC	Corticosteroids, potent (group III)	1243	75	2451	89	0.0613415	0.184116	0.333167	1.06326	0.74109	1.52549	0.739	0	0.858
1yrs	A	D07AD	Corticosteroids, very potent (group IV)	1293	25	2506	34	0.279505	0.286097	0.97696	1.32247	0.754718	2.31734	0.329	0	0.604
1yrs	A	D07CA	Corticosteroids, weak, combinations with antibiotics	1306	12	2528	12	0.48396	0.450857	1.07342	1.62249	0.670331	3.9271	0.283	0	0.579
1yrs	A	D07CC	Corticosteroids, potent, combinations with antibiotics	1284	34	2505	35	0.0133825	0.300858	0.0444811	1.01347	0.561876	1.82803	0.965	0	0.975
1yrs	A	D07CD	Corticosteroids, very potent, combinations with antibiotics	1311	7	2529	11	-0.352575	0.631769	-0.558076	0.702876	0.203679	2.42555	0.577	0	0.762
1yrs	A	D09AA	Medicated dressings with antiinfectives	1304	14	2529	11	0.44219	0.499568	0.885145	1.55611	0.584351	4.14388	0.376	0	0.651
1yrs	A	D11AC	Medicated shampoos	1309	9	2523	17	-0.892444	0.603546	-1.47867	0.409653	0.125463	1.33757	0.139	0	0.411
1yrs	A	G01AF	Imidazole derivatives	1288	30	2522	18	0.692967	0.363347	1.90718	1.99964	0.980783	4.07691	0.0566	0	0.204
1yrs	A	G03BA	3-oxoandrosten (4) derivatives	1311	7	2528	12	-0.561821	0.560687	-1.00202	0.57017	0.189931	1.71164	0.316	0	0.604
1yrs	A	G03CA	Natural and semisynthetic estrogens, plain	1269	49	2410	130	0.0190232	0.177702	0.107051	1.01921	0.719372	1.44401	0.915	0	0.948
1yrs	A	G03FA	Progestogens and estrogens, fixed combinations	1313	5	2529	11	1.18368	0.448504	2.63918	3.26639	1.35575	7.86965	0.00834	-1	0.0536
1yrs	A	G03FB	Progestogens and estrogens, sequential preparations	1311	7	2519	21	0.567714	0.397417	1.42851	1.76423	0.809405	3.84543	0.153	0	0.412
1yrs	A	G04BD	Urinary antispasmodics	1267	51	2462	78	-0.105532	0.217177	-0.485925	0.899846	0.587825	1.37749	0.627	0	0.8
1yrs	A	G04BE	Drugs used in erectile dysfunction	1256	62	2453	87	0.232743	0.188591	1.23411	1.26206	0.871965	1.82666	0.217	0	0.523
1yrs	A	G04CA	Alpha-adrenoreceptor antagonists	1310	8	2531	9	-0.206523	0.549442	-0.375878	0.813407	0.276996	2.38859	0.707	0	0.837
1yrs	A	G04CB	Testosterone-5-alpha reductase inhibitors	1280	38	2498	42	-0.172975	0.284792	-0.607373	0.841159	0.481267	1.47018	0.544	0	0.741
1yrs	A	H02AA	Mineralocorticoids	1310	8	2535	5	0.276515	0.733568	0.376945	1.31853	0.312952	5.55521	0.706	0	0.837
1yrs	A	H02AB	Glucocorticoids	1140	178	2396	144	0.722097	0.140824	5.12766	2.05875	1.56205	2.71338	3.08e-07	-1	1.39e-05
1yrs	A	H02BX	Corticosteroids for systemic use, combinations	1307	11	2525	15	-0.125321	0.446007	-0.280984	0.882214	0.367969	2.11512	0.779	0	0.882
1yrs	A	H03AA	Thyroid hormones	1234	84	2353	187	-0.369555	0.157201	-2.35084	0.691042	0.507752	0.940495	0.0188	1	0.095
1yrs	A	J01AA	Tetracyclines [DG:DG01197]	1159	159	2391	149	0.55485	0.13708	4.04764	1.74168	1.33122	2.2787	5.28e-05	-1	0.00095
1yrs	A	J01CA	Penicillins with extended spectrum [DG:DG01780]	1064	254	2268	272	0.441149	0.108763	4.05607	1.55449	1.25597	1.92396	5.09e-05	-1	0.00095
1yrs	A	J01CE	Beta-lactamase sensitive penicillins [DG:DG01778]	1305	13	2518	22	0.0954092	0.384966	0.247838	1.10011	0.517188	2.34004	0.804	0	0.894
1yrs	A	J01CF	Beta-lactamase resistant penicillins [DG:DG01779]	1180	138	2409	131	0.466162	0.146779	3.17594	1.59386	1.19529	2.12534	0.00151	-1	0.0123
1yrs	A	J01CR	Combinations of penicillins, incl. beta-lactamase inhibitors	1245	73	2500	40	1.00644	0.235785	4.26846	2.73584	1.72317	4.34365	2.02e-05	-1	0.000454
1yrs	A	J01DB	First-generation cephalosporins [DG:DG01774]	1295	23	2519	21	0.41356	0.398662	1.03737	1.51219	0.692082	3.30412	0.3	0	0.604
1yrs	A	J01EA	Trimethoprim and derivatives [DG:DG01581]	1275	43	2507	33	0.734252	0.270963	2.70979	2.08392	1.22508	3.54485	0.00676	-1	0.0468
1yrs	A	J01EE	Combinations of sulfonamides and trimethoprim, incl. derivatives	1311	7	2534	6	0.520579	0.661066	0.787483	1.683	0.460475	6.15124	0.431	0	0.675
1yrs	A	J01FA	Macrolides [DG:DG01551]	1235	83	2456	84	0.466615	0.184874	2.52397	1.59459	1.10977	2.2912	0.0116	-1	0.0676
1yrs	A	J01FF	Lincosamides [DG:DG01578]	1308	10	2535	5	0.530954	0.814871	0.651581	1.70055	0.344153	8.4029	0.515	0	0.718
1yrs	A	J01MA	Fluoroquinolones [DG:DG01549]	1296	22	2525	15	0.586363	0.390412	1.50191	1.79744	0.836047	3.86437	0.133	0	0.4
1yrs	A	J01XE	Nitrofuran derivatives	1176	142	2365	175	0.331293	0.134776	2.45811	1.39277	1.06935	1.814	0.014	-1	0.0788
1yrs	A	J02AC	Triazole derivatives	1295	23	2520	20	0.879248	0.34265	2.56602	2.40909	1.23054	4.71638	0.0103	-1	0.0641
1yrs	A	J05AB	Nucleosides and nucleotides excl. reverse transcriptase inhibitors [DG:DG02840]	1298	20	2510	30	0.246789	0.316051	0.780851	1.27991	0.688765	2.37841	0.435	0	0.675
1yrs	A	J07AL	Pneumococcal vaccines	1312	6	2528	12	-0.264994	0.53125	-0.498813	0.76721	0.270751	2.17399	0.618	0	0.8
1yrs	A	J07BB	Influenza vaccines	1189	129	2365	175	0.0324	0.135444	0.239214	1.03293	0.792036	1.34709	0.811	0	0.896
1yrs	A	J07CA	Bacterial and viral vaccines, combined	1310	8	2521	19	-0.324638	0.476693	-0.68102	0.722789	0.283871	1.84036	0.496	0	0.703
1yrs	A	L01BC	Pyrimidine analogues	1310	8	2535	5	1.19918	0.557451	2.15118	3.31738	1.1121	9.89573	0.0315	-1	0.126
1yrs	A	L02AE	Gonadotropin releasing hormone analogues	1304	14	2534	6	0.760655	0.618166	1.2305	2.13968	0.636793	7.1895	0.219	0	0.523
1yrs	A	L02BG	Aromatase inhibitors [DG:DG01596]	1307	11	2512	28	-0.218996	0.380038	-0.576248	0.803325	0.381329	1.69232	0.565	0	0.753
1yrs	A	L04AX	Other immunosuppressants	1302	16	2511	29	-0.307246	0.361242	-0.850527	0.735469	0.362224	1.49332	0.395	0	0.652
1yrs	A	M01AB	Acetic acid derivatives and related substances	1307	11	2526	14	0.30989	0.438662	0.706444	1.36328	0.576867	3.22175	0.48	0	0.692
1yrs	A	M01AE	Propionic acid derivatives	1232	86	2368	172	-0.0660091	0.144755	-0.456006	0.936122	0.70482	1.24333	0.648	0	0.816
1yrs	A	M01AH	Coxibs	1309	9	2531	9	0.361728	0.536038	0.674817	1.43581	0.501967	4.10693	0.5	0	0.703
1yrs	A	M02AA	Antiinflammatory preparations, non-steroids for topical use	1174	144	2365	175	0.00822216	0.140401	0.0585619	1.00826	0.765638	1.32776	0.953	0	0.969
1yrs	A	M03BX	Other centrally acting agents	1304	14	2534	6	1.53314	0.499823	3.06736	4.6327	1.7388	12.3429	0.00217	-1	0.017
1yrs	A	M04AA	Preparations inhibiting uric acid production	1261	57	2466	74	-0.343085	0.240003	-1.4295	0.709578	0.443246	1.13594	0.153	0	0.412
1yrs	A	M04AC	Preparations with no effect on uric acid metabolism	1299	19	2516	24	0.0042305	0.400735	0.0105569	1.00424	0.457745	2.20319	0.992	0	0.992
1yrs	A	M05BA	Bisphosphonates [DG:DG01600]	1245	73	2474	66	0.371526	0.198288	1.87367	1.44995	0.982914	2.13889	0.0611	0	0.207
1yrs	A	N01BB	Amides	1287	31	2511	29	0.655333	0.287173	2.28201	1.92578	1.0967	3.38164	0.0225	-1	0.107
1yrs	A	N01BX	Other local anesthetics	1313	5	2535	5	-0.703291	0.876919	-0.802003	0.494953	0.0886939	2.76207	0.423	0	0.667
1yrs	A	N02AA	Natural opium alkaloids	1220	98	2497	43	1.23685	0.220144	5.61835	3.44474	2.23723	5.30399	2.07e-08	-1	1.24e-06
1yrs	A	N02AE	Oripavine derivatives	1290	28	2520	20	0.293014	0.402598	0.727809	1.34046	0.608772	2.95158	0.467	0	0.692
1yrs	A	N02AJ	Opioids in combination with non-opioid analgesics	1178	140	2323	217	-0.0937484	0.132798	-0.705949	0.910512	0.701798	1.1813	0.48	0	0.692
1yrs	A	N02AX	Other opioids	1269	49	2484	56	-0.0362189	0.250707	-0.144467	0.964429	0.589931	1.57667	0.885	0	0.933
1yrs	A	N02BE	Anilides	948	370	2093	447	0.0962526	0.0983461	0.978713	1.10104	0.907953	1.33518	0.328	0	0.604
1yrs	A	N02BG	Other analgesics and antipyretics	1310	8	2533	7	0.504927	0.583193	0.865798	1.65686	0.528099	5.19827	0.387	0	0.652
1yrs	A	N02CC	Selective serotonin (5HT1) agonists [DG:DG01943]	1306	12	2500	40	-0.204152	0.32731	-0.623726	0.815339	0.429184	1.54893	0.533	0	0.732
1yrs	A	N03AB	Hydantoin derivatives	1313	5	2535	5	0.66676	0.778405	0.856572	1.94792	0.42343	8.96106	0.392	0	0.652
1yrs	A	N03AE	Benzodiazepine derivatives	1313	5	2530	10	-0.720478	0.736419	-0.978354	0.486519	0.114831	2.06129	0.328	0	0.604
1yrs	A	N03AF	Carboxamide derivatives	1307	11	2533	7	0.704341	0.571249	1.23298	2.02251	0.659918	6.19859	0.218	0	0.523
1yrs	A	N03AG	Fatty acid derivatives	1308	10	2527	13	-0.317157	0.573587	-0.552936	0.728216	0.23652	2.24209	0.58	0	0.762
1yrs	A	N03AX	Other antiepileptics	1163	155	2430	110	0.637738	0.158865	4.01434	1.8922	1.38579	2.58366	6.08e-05	-1	0.000995
1yrs	A	N04BA	Dopa and dopa derivatives	1294	24	2524	16	0.819761	0.376701	2.17616	2.26996	1.0846	4.75081	0.0296	-1	0.123
1yrs	A	N04BC	Dopamine agonists	1302	16	2528	12	0.543218	0.443729	1.22421	1.72154	0.721264	4.10902	0.221	0	0.523
1yrs	A	N05AB	Phenothiazines with piperazine structure	1281	37	2512	28	0.972073	0.27652	3.51538	2.64342	1.53716	4.54584	0.000444	-1	0.005
1yrs	A	N05AH	Diazepines, oxazepines and thiazepines	1307	11	2522	18	-0.18909	0.472733	-0.399994	0.827712	0.327613	2.09121	0.689	0	0.827
1yrs	A	N05AX	Other antipsychotics	1295	23	2524	16	0.57366	0.396107	1.44824	1.77475	0.816326	3.85843	0.148	0	0.412
1yrs	A	N05BA	Benzodiazepine derivatives [DG:DG01914]	1248	70	2472	68	0.670414	0.196185	3.41725	1.95505	1.3308	2.87212	0.000639	-1	0.00677
1yrs	A	N05CD	Benzodiazepine derivatives	1281	37	2520	20	1.04536	0.324247	3.22395	2.84442	1.50628	5.37131	0.00128	-1	0.0109
1yrs	A	N05CF	Benzodiazepine related drugs	1275	43	2487	53	0.226715	0.23439	0.967258	1.25447	0.792292	1.98626	0.334	0	0.606
1yrs	A	N06AA	Non-selective monoamine reuptake inhibitors [DG:DG01730]	1209	109	2393	147	-0.00233016	0.157326	-0.014811	0.997673	0.732875	1.35814	0.988	0	0.992
1yrs	A	N06AB	Selective serotonin reuptake inhibitors	1178	140	2294	246	-0.0462232	0.136825	-0.337828	0.954829	0.730169	1.24861	0.736	0	0.858
1yrs	A	N06AX	Other antidepressants	1224	94	2440	100	0.400743	0.176947	2.26476	1.49293	1.0553	2.11206	0.0236	-1	0.109
1yrs	A	N06DA	Anticholinesterases	1286	32	2503	37	0.135854	0.302227	0.449508	1.14551	0.633378	2.07175	0.653	0	0.816
1yrs	A	N06DX	Other anti-dementia drugs	1285	33	2507	33	0.313372	0.320306	0.978354	1.36803	0.730071	2.56346	0.328	0	0.604
1yrs	A	N07CA	Antivertigo preparations	1296	22	2506	34	-0.561298	0.3573	-1.57094	0.570468	0.28314	1.14937	0.116	0	0.361
1yrs	A	P01AB	Nitroimidazole derivatives	1301	17	2515	25	0.416114	0.329233	1.26389	1.51606	0.795032	2.891	0.206	0	0.523
1yrs	A	P01BA	Aminoquinolines	1308	10	2529	11	0.294136	0.510698	0.575949	1.34197	0.493057	3.65246	0.565	0	0.753
1yrs	A	P01BC	Methanolquinolines	1287	31	2514	26	0.386193	0.351902	1.09745	1.47137	0.738053	2.93329	0.273	0	0.564
1yrs	A	R01AD	Corticosteroids	1220	98	2363	177	-0.0878644	0.147798	-0.59449	0.915885	0.685481	1.22373	0.552	0	0.747
1yrs	A	R03AC	Selective beta-2-adrenoreceptor agonists	1110	208	2248	292	0.0611068	0.134249	0.455175	1.06301	0.817013	1.38308	0.649	0	0.816
1yrs	A	R03AK	Adrenergics in combination with corticosteroids or other drugs, excl. anticholinergics	1215	103	2386	154	-0.0465033	0.180713	-0.257332	0.954561	0.669779	1.36043	0.797	0	0.891
1yrs	A	R03AL	Adrenergics in combination with anticholinergics incl. triple combinations with corticosteroids	1291	27	2524	16	0.591543	0.406084	1.4567	1.80677	0.814958	4.00565	0.145	0	0.412
1yrs	A	R03BA	Glucocorticoids	1278	40	2418	122	-0.74423	0.220465	-3.37573	0.4751	0.308365	0.731988	0.000744	1	0.00744
1yrs	A	R03BB	Anticholinergics	1273	45	2499	41	0.235482	0.317892	0.740761	1.26552	0.678567	2.36018	0.459	0	0.69
1yrs	A	R03DA	Xanthines	1313	5	2535	5	-0.831007	0.923157	-0.90018	0.43561	0.0712948	2.66158	0.368	0	0.643
1yrs	A	R03DC	Leukotriene receptor antagonists	1307	11	2514	26	-0.651261	0.453799	-1.43513	0.521388	0.214173	1.26928	0.151	0	0.412
1yrs	A	R05CB	Mucolytics	1282	36	2519	21	0.408843	0.35637	1.14724	1.50507	0.748375	3.02689	0.251	0	0.552
1yrs	A	R05DA	Opium alkaloids and derivatives	1228	90	2440	100	0.46921	0.174488	2.68906	1.59873	1.13554	2.25085	0.0072	-1	0.048
1yrs	A	R06AB	Substituted alkylamines	1305	13	2534	6	1.19038	0.545017	2.18412	3.28833	1.12956	9.57287	0.029	-1	0.123
1yrs	A	R06AD	Phenothiazine derivatives	1303	15	2533	7	0.994614	0.528743	1.88109	2.70368	0.958841	7.62367	0.06	0	0.207
1yrs	A	R06AE	Piperazine derivatives	1218	100	2470	70	0.71409	0.183338	3.89493	2.04233	1.42567	2.92572	9.99e-05	-1	0.0015
1yrs	A	R06AX	Other antihistamines for systemic use	1266	52	2461	79	-0.186282	0.213142	-0.873983	0.830039	0.546531	1.26062	0.382	0	0.652
1yrs	A	S01AA	Antibiotics	1281	37	2507	33	0.387771	0.291005	1.33252	1.47369	0.832961	2.60729	0.183	0	0.477
1yrs	A	S01BA	Corticosteroids, plain	1309	9	2533	7	0.563876	0.560761	1.00555	1.75747	0.585351	5.27667	0.315	0	0.604
1yrs	A	S01EC	Carbonic anhydrase inhibitors	1307	11	2528	12	-0.109539	0.505894	-0.216525	0.896248	0.33241	2.41647	0.829	0	0.906
1yrs	A	S01ED	Beta blocking agents	1308	10	2516	24	-0.941519	0.467088	-2.01572	0.390035	0.156096	0.974575	0.0439	1	0.165
1yrs	A	S01EE	Prostaglandin analogues	1295	23	2494	46	-0.809775	0.319461	-2.53482	0.444958	0.237852	0.832398	0.0113	1	0.0676
1yrs	A	S01GX	Other antiallergics	1305	13	2524	16	-0.089596	0.459008	-0.195195	0.9143	0.371755	2.24865	0.845	0	0.911
1yrs	A	S01XA	Other ophthalmologicals	1236	82	2433	107	-0.0880051	0.180346	-0.487979	0.915756	0.643014	1.30419	0.626	0	0.8
1yrs	A	S02AA	Antiinfectives	1310	8	2530	10	-0.155589	0.578578	-0.268916	0.855911	0.275287	2.66116	0.788	0	0.887
1yrs	A	S02CA	Corticosteroids and antiinfectives in combination	1313	5	2524	16	-0.834359	0.605586	-1.37777	0.434153	0.132435	1.42325	0.168	0	0.446
1yrs	A	V07AY	Other non-therapeutic auxiliary products	1229	89	2453	87	0.146032	0.205075	0.712088	1.15723	0.774114	1.72996	0.476	0	0.692
1yrs	B	A01AB	Antiinfectives and antiseptics for local oral treatment	164	6	3568	120	0.0158974	0.493909	0.0321869	1.01602	0.385794	2.6758	0.974	0	0.984
1yrs	B	A02BA	H2-receptor antagonists [DG:DG01481]	161	9	3600	88	0.431296	0.459411	0.938802	1.53925	0.625366	3.78865	0.348	0	0.509
1yrs	B	A02BC	Proton pump inhibitors [DG:DG01646]	104	66	2506	1182	0.00691064	0.204353	0.0338171	1.00693	0.674529	1.50315	0.973	0	0.984
1yrs	B	A02BX	Other drugs for peptic ulcer and gastro-oesophageal reflux disease (GORD)	159	11	3556	132	0.374885	0.393827	0.951904	1.45482	0.672169	3.14878	0.341	0	0.509
1yrs	B	A03BB	Belladonna alkaloids, semisynthetic, quaternary ammonium compounds	152	18	3629	59	1.7103	0.356846	4.79284	5.53065	2.74747	11.1332	1.71e-06	-1	5.36e-05
1yrs	B	A03FA	Propulsives [DG:DG01763]	162	8	3659	29	1.56506	0.539989	2.89832	4.78297	1.65926	13.7874	0.00377	-1	0.0296
1yrs	B	A06AA	Softeners, emollients	158	12	3595	93	0.507504	0.382327	1.32741	1.66114	0.784994	3.51517	0.184	0	0.337
1yrs	B	A06AB	Contact laxatives	134	36	3531	157	1.13353	0.265477	4.26978	3.1066	1.84603	5.22794	2e-05	-1	0.00047
1yrs	B	A06AD	Osmotically acting laxatives	121	49	3373	315	0.8186	0.226671	3.6114	2.26732	1.45382	3.53604	0.000308	-1	0.00414
1yrs	B	A07AA	Antibiotics	163	7	3641	47	0.477621	0.560414	0.852265	1.61223	0.537344	4.83731	0.394	0	0.561
1yrs	B	A07DA	Antipropulsives	161	9	3626	62	1.09847	0.481842	2.27974	2.99958	1.16624	7.71499	0.0227	-1	0.101
1yrs	B	A10AB	Insulins and analogues for injection, fast-acting	151	19	3539	149	0.76692	0.449843	1.70486	2.15312	0.891335	5.20112	0.0883	0	0.213
1yrs	B	A10AD	Insulins and analogues for injection, intermediate- or long-acting combined with fast-acting	164	6	3652	36	0.308353	0.757499	0.407067	1.36118	0.308268	6.01041	0.684	0	0.794
1yrs	B	A10AE	Insulins and analogues for injection, long-acting	163	7	3658	30	0.929123	0.746783	1.24417	2.53229	0.585665	10.9491	0.213	0	0.365
1yrs	B	A10BA	Biguanides [DG:DG01684]	153	17	3392	296	-0.484804	0.426658	-1.13628	0.615818	0.266788	1.42147	0.256	0	0.415
1yrs	B	A10BB	Sulfonylureas	163	7	3598	90	0.192563	0.58867	0.327116	1.21235	0.382291	3.84472	0.744	0	0.832
1yrs	B	A10BH	Dipeptidyl peptidase 4 (DPP-4) inhibitors [DG:DG01601]	163	7	3607	81	-0.256766	0.65945	-0.389364	0.773549	0.212317	2.81832	0.697	0	0.797
1yrs	B	A11CC	Vitamin D and analogues	156	14	3558	130	0.569129	0.375076	1.51737	1.76673	0.846845	3.68583	0.129	0	0.27
1yrs	B	A11DA	Vitamin B1, plain	160	10	3657	31	1.53977	0.506813	3.03815	4.66353	1.72655	12.5965	0.0024	-1	0.0231
1yrs	B	A12AX	Calcium, combinations with vitamin D and/or other drugs	138	32	3360	328	0.490699	0.265406	1.84886	1.63346	0.970784	2.74848	0.0645	0	0.184
1yrs	B	B01AA	Vitamin K antagonists	164	6	3621	67	0.0225701	0.634982	0.0355445	1.02283	0.294533	3.55198	0.972	0	0.984
1yrs	B	B01AC	Platelet aggregation inhibitors excl. heparin	131	39	3231	457	-0.186201	0.264488	-0.704007	0.830107	0.494232	1.39424	0.481	0	0.637
1yrs	B	B01AF	Direct factor Xa inhibitors	144	26	3488	200	0.518396	0.289798	1.78882	1.67933	0.951442	2.96409	0.0737	0	0.198
1yrs	B	B03AA	Iron bivalent, oral preparations	150	20	3556	132	0.75581	0.354243	2.13359	2.12933	1.0632	4.26453	0.0329	-1	0.129
1yrs	B	B03BA	Vitamin B12 (cyanocobalamin and analogues)	160	10	3551	137	0.0872468	0.419221	0.208117	1.09117	0.479664	2.48225	0.835	0	0.912
1yrs	B	B03BB	Folic acid and derivatives	147	23	3543	145	0.759897	0.325279	2.33614	2.13806	1.12993	4.04562	0.0195	-1	0.101
1yrs	B	B05CB	Salt solutions	165	5	3668	20	1.00699	0.631155	1.59547	2.73735	0.794181	9.43495	0.111	0	0.242
1yrs	B	C01AA	Digitalis glycosides [DG:DG01697]	164	6	3657	31	0.82311	0.579277	1.42093	2.27757	0.731535	7.09103	0.155	0	0.306
1yrs	B	C01DA	Organic nitrates	160	10	3521	167	-0.217199	0.428422	-0.506975	0.80477	0.347442	1.86406	0.612	0	0.738
1yrs	B	C02CA	Alpha-adrenoreceptor antagonists	164	6	3596	92	-0.473296	0.570502	-0.829614	0.622945	0.203556	1.90641	0.407	0	0.571
1yrs	B	C03AA	Thiazides, plain [DG:DG01749]	161	9	3565	123	-0.0458928	0.425258	-0.107917	0.955144	0.414929	2.19869	0.914	0	0.965
1yrs	B	C03BA	Sulfonamides, plain	159	11	3608	80	0.477964	0.455031	1.0504	1.61279	0.660894	3.93571	0.294	0	0.462
1yrs	B	C03CA	Sulfonamides, plain	140	30	3496	192	0.503826	0.295256	1.7064	1.65504	0.927699	2.95264	0.088	0	0.213
1yrs	B	C07AB	Beta blocking agents, selective	129	41	3277	411	0.345258	0.255664	1.35044	1.41235	0.855565	2.33149	0.177	0	0.333
1yrs	B	C08CA	Dihydropyridine derivatives [DG:DG01928]	133	37	3092	596	-0.188799	0.249104	-0.75791	0.827953	0.508044	1.34931	0.449	0	0.611
1yrs	B	C09AA	ACE inhibitors, plain [DG:DG01501]	135	35	3135	553	-0.18683	0.262165	-0.712643	0.829585	0.496175	1.38703	0.476	0	0.637
1yrs	B	C09CA	Angiotensin II receptor blockers, plain [DG:DG01495]	148	22	3385	303	0.113645	0.298633	0.38055	1.12035	0.623847	2.01202	0.704	0	0.797
1yrs	B	C10AA	HMG CoA reductase inhibitors [DG:DG01660]	91	79	2509	1179	-0.206149	0.204841	-1.00638	0.813712	0.544571	1.21587	0.314	0	0.484
1yrs	B	D01AC	Imidazole and triazole derivatives	148	22	3492	196	0.212535	0.33979	0.625489	1.23681	0.635304	2.40782	0.532	0	0.685
1yrs	B	D01AX		160	10	3619	69	0.838987	0.426797	1.96578	2.31402	1.00222	5.34284	0.0494	-1	0.16
1yrs	B	D02AE	Carbamide products	165	5	3667	21	1.39678	0.719913	1.9402	4.04214	0.985434	16.5804	0.0524	0	0.16
1yrs	B	D02AX	Other emollients and protectives	130	40	3373	315	0.687038	0.246615	2.78587	1.98782	1.22572	3.22376	0.00536	-1	0.036
1yrs	B	D06AX	Other antibiotics for topical use	165	5	3639	49	0.766292	0.612228	1.25164	2.15177	0.647891	7.14646	0.211	0	0.365
1yrs	B	D07AA	Corticosteroids, weak (group I)	163	7	3630	58	0.89232	0.482326	1.85003	2.44079	0.948076	6.28371	0.0644	0	0.184
1yrs	B	D07AC	Corticosteroids, potent (group III)	157	13	3537	151	0.423069	0.364045	1.16213	1.52664	0.747761	3.11681	0.245	0	0.407
1yrs	B	D07CC	Corticosteroids, potent, combinations with antibiotics	161	9	3628	60	0.686256	0.50456	1.36011	1.98626	0.738617	5.3414	0.174	0	0.333
1yrs	B	D09AA	Medicated dressings with antiinfectives	165	5	3668	20	1.29202	0.635368	2.0335	3.64013	1.04742	12.6507	0.0421	-1	0.152
1yrs	B	G04BD	Urinary antispasmodics	161	9	3568	120	0.0839238	0.426824	0.196624	1.08755	0.470998	2.51117	0.844	0	0.912
1yrs	B	G04BE	Drugs used in erectile dysfunction	160	10	3549	139	0.583891	0.399711	1.46078	1.793	0.818914	3.92576	0.144	0	0.295
1yrs	B	G04CA	Alpha-adrenoreceptor antagonists	165	5	3676	12	1.65909	0.676459	2.45261	5.25451	1.39492	19.7933	0.0142	-1	0.0836
1yrs	B	G04CB	Testosterone-5-alpha reductase inhibitors	164	6	3614	74	-0.95612	0.621982	-1.53722	0.384381	0.113544	1.30125	0.124	0	0.266
1yrs	B	H02AB	Glucocorticoids	140	30	3396	292	0.743742	0.281617	2.64097	2.10379	1.2112	3.65419	0.0083	-1	0.052
1yrs	B	H03AA	Thyroid hormones	150	20	3437	251	0.563848	0.327983	1.71914	1.75742	0.923864	3.34306	0.0857	0	0.213
1yrs	B	J01AA	Tetracyclines [DG:DG01197]	146	24	3404	284	0.558894	0.2861	1.9535	1.74874	0.997974	3.06429	0.0508	0	0.16
1yrs	B	J01CA	Penicillins with extended spectrum [DG:DG01780]	128	42	3204	484	0.468455	0.232527	2.01463	1.59752	1.01265	2.52021	0.044	-1	0.153
1yrs	B	J01CF	Beta-lactamase resistant penicillins [DG:DG01779]	141	29	3448	240	0.592646	0.277878	2.13276	1.80877	1.04901	3.1188	0.033	-1	0.129
1yrs	B	J01CR	Combinations of penicillins, incl. beta-lactamase inhibitors	158	12	3587	101	0.436578	0.416482	1.04825	1.5474	0.683882	3.50127	0.295	0	0.462
1yrs	B	J01EA	Trimethoprim and derivatives [DG:DG01581]	160	10	3622	66	0.607089	0.459231	1.32197	1.83508	0.745819	4.5152	0.186	0	0.337
1yrs	B	J01FA	Macrolides [DG:DG01551]	156	14	3535	153	0.489529	0.37714	1.298	1.63155	0.778891	3.41761	0.194	0	0.345
1yrs	B	J01MA	Fluoroquinolones [DG:DG01549]	164	6	3657	31	1.05359	0.609946	1.72735	2.86794	0.867399	9.48245	0.0842	0	0.213
1yrs	B	J01XE	Nitrofuran derivatives	139	31	3402	286	0.760694	0.255947	2.97208	2.13976	1.29549	3.53424	0.00298	-1	0.0254
1yrs	B	J07BB	Influenza vaccines	162	8	3392	296	-0.968242	0.425793	-2.27397	0.37975	0.164797	0.87508	0.023	1	0.101
1yrs	B	M01AE	Propionic acid derivatives	161	9	3439	249	-0.00980355	0.404135	-0.0242581	0.990244	0.448366	2.18701	0.981	0	0.984
1yrs	B	M02AA	Antiinflammatory preparations, non-steroids for topical use	144	26	3395	293	0.159368	0.277506	0.574288	1.17277	0.680652	2.02069	0.566	0	0.7
1yrs	B	M04AA	Preparations inhibiting uric acid production	161	9	3566	122	-0.353647	0.537732	-0.657665	0.702122	0.244653	2.015	0.511	0	0.667
1yrs	B	M05BA	Bisphosphonates [DG:DG01600]	151	19	3568	120	1.1978	0.322745	3.7113	3.31283	1.75951	6.23745	0.000209	-1	0.00393
1yrs	B	N02AA	Natural opium alkaloids	134	36	3583	105	1.8316	0.27388	6.68762	6.2439	3.64968	10.6821	2.6e-11	-1	1.22e-09
1yrs	B	N02AE	Oripavine derivatives	159	11	3651	37	1.04085	0.504187	2.06441	2.83162	1.05374	7.60914	0.0391	-1	0.147
1yrs	B	N02AJ	Opioids in combination with non-opioid analgesics	146	24	3355	333	0.330483	0.285266	1.15851	1.39164	0.795484	2.43457	0.247	0	0.407
1yrs	B	N02AX	Other opioids	161	9	3592	96	0.723704	0.447749	1.61632	2.06206	0.857147	4.96073	0.106	0	0.237
1yrs	B	N02BE	Anilides	89	81	2952	736	0.7048	0.203229	3.46801	2.02344	1.35846	3.01394	0.00053	-1	0.00623
1yrs	B	N03AX	Other antiepileptics	137	33	3456	232	0.852802	0.281416	3.0304	2.34621	1.35129	4.07366	0.00246	-1	0.0231
1yrs	B	N04BA	Dopa and dopa derivatives	163	7	3655	33	0.906792	0.500316	1.81244	2.47637	0.928562	6.60418	0.07	0	0.194
1yrs	B	N05AX	Other antipsychotics	162	8	3657	31	1.40956	0.505968	2.78586	4.09414	1.51826	11.0403	0.00536	-1	0.036
1yrs	B	N05BA	Benzodiazepine derivatives [DG:DG01914]	150	20	3570	118	1.18029	0.323663	3.64667	3.25532	1.72586	6.14021	0.000269	-1	0.00414
1yrs	B	N05CD	Benzodiazepine derivatives	145	25	3656	32	2.47269	0.358087	6.90528	11.8543	5.87456	23.9208	5.84e-12	-1	5.49e-10
1yrs	B	N05CF	Benzodiazepine related drugs	165	5	3597	91	-0.362521	0.621191	-0.583591	0.695919	0.205889	2.35226	0.559	0	0.7
1yrs	B	N06AA	Non-selective monoamine reuptake inhibitors [DG:DG01730]	156	14	3446	242	0.0555095	0.37564	0.147773	1.05708	0.506129	2.20777	0.882	0	0.943
1yrs	B	N06AB	Selective serotonin reuptake inhibitors	149	21	3323	365	0.189714	0.323262	0.586875	1.2089	0.641422	2.27845	0.557	0	0.7
1yrs	B	N06AX	Other antidepressants	153	17	3511	177	0.738046	0.323361	2.28242	2.09184	1.10968	3.94332	0.0225	-1	0.101
1yrs	B	N06DA	Anticholinesterases	159	11	3630	58	0.683422	0.408005	1.67503	1.98064	0.890026	4.40768	0.094	0	0.221
1yrs	B	N06DX	Other anti-dementia drugs	157	13	3635	53	0.825076	0.42568	1.93825	2.28205	0.990539	5.25751	0.0527	0	0.16
1yrs	B	R01AD	Corticosteroids	163	7	3420	268	-0.659547	0.465002	-1.41837	0.517086	0.207791	1.28676	0.156	0	0.306
1yrs	B	R03AC	Selective beta-2-adrenoreceptor agonists	148	22	3210	478	-0.33741	0.362327	-0.931229	0.713616	0.350715	1.45203	0.352	0	0.509
1yrs	B	R03AK	Adrenergics in combination with corticosteroids or other drugs, excl. anticholinergics	158	12	3443	245	-0.00931164	0.461449	-0.0201791	0.990732	0.400909	2.44831	0.984	0	0.984
1yrs	B	R03AL	Adrenergics in combination with anticholinergics incl. triple combinations with corticosteroids	164	6	3651	37	0.530406	0.663773	0.799077	1.69962	0.462561	6.24504	0.424	0	0.587
1yrs	B	R03BB	Anticholinergics	163	7	3609	79	0.290334	0.636641	0.456041	1.33687	0.383716	4.6577	0.648	0	0.762
1yrs	B	R05CB	Mucolytics	162	8	3639	49	0.881161	0.545021	1.61675	2.4137	0.829113	7.02672	0.106	0	0.237
1yrs	B	R05DA	Opium alkaloids and derivatives	158	12	3510	178	0.0951354	0.390046	0.243908	1.09981	0.511922	2.36282	0.807	0	0.893
1yrs	B	R06AE	Piperazine derivatives	151	19	3537	151	0.768432	0.330675	2.32383	2.15638	1.12763	4.12369	0.0202	-1	0.101
1yrs	B	R06AX	Other antihistamines for systemic use	163	7	3564	124	0.25821	0.523702	0.493049	1.29461	0.463685	3.61456	0.622	0	0.74
1yrs	B	S01AA	Antibiotics	159	11	3629	59	1.03959	0.459017	2.26481	2.82805	1.14987	6.95548	0.0236	-1	0.101
1yrs	B	S01XA	Other ophthalmologicals	158	12	3511	177	-0.218059	0.414034	-0.526668	0.804078	0.357076	1.81066	0.599	0	0.731
1yrs	B	V07AY	Other non-therapeutic auxiliary products	154	16	3528	160	0.400685	0.426257	0.940008	1.49285	0.647247	3.44318	0.347	0	0.509
1yrs	C	A01AB	Antiinfectives and antiseptics for local oral treatment	1266	52	385401	7741	0.596403	0.151945	3.92514	1.81558	1.34797	2.4454	8.67e-05	-1	0.000354
1yrs	C	A01AD	Other agents for local oral treatment	1301	17	391604	1538	0.820687	0.286941	2.86012	2.27206	1.29471	3.98718	0.00424	-1	0.0116
1yrs	C	A02BA	H2-receptor antagonists [DG:DG01481]	1262	56	386194	6948	0.482122	0.166755	2.89119	1.61951	1.16799	2.24557	0.00384	-1	0.0108
1yrs	C	A02BC	Proton pump inhibitors [DG:DG01646]	862	456	283814	109328	-0.0557245	0.0687556	-0.810472	0.9458	0.826559	1.08224	0.418	0	0.564
1yrs	C	A02BX	Other drugs for peptic ulcer and gastro-oesophageal reflux disease (GORD)	1260	58	383722	9420	0.245669	0.161959	1.51686	1.27848	0.930748	1.75611	0.129	0	0.219
1yrs	C	A03AA	Synthetic anticholinergics, esters with tertiary amino group	1299	19	388996	4146	0.0890881	0.263595	0.337974	1.09318	0.652105	1.83258	0.735	0	0.806
1yrs	C	A03AX	Other drugs for functional gastrointestinal disorders	1312	6	391432	1710	-0.439344	0.513465	-0.855646	0.644459	0.235577	1.76303	0.392	0	0.544
1yrs	C	A03BB	Belladonna alkaloids, semisynthetic, quaternary ammonium compounds	1274	44	390072	3070	1.27715	0.170755	7.47944	3.58641	2.56633	5.01196	7.48e-14	-1	9.97e-13
1yrs	C	A03FA	Propulsives [DG:DG01763]	1289	29	391336	1806	1.4069	0.207979	6.76464	4.08329	2.7163	6.13823	1.34e-11	-1	1.49e-10
1yrs	C	A04AA	Serotonin (5HT3) antagonists	1312	6	392749	393	1.61551	0.406767	3.97159	5.03047	2.26656	11.1648	7.14e-05	-1	0.00031
1yrs	C	A06AA	Softeners, emollients	1243	75	389191	3951	1.38403	0.145393	9.51929	3.99097	3.00137	5.30686	1.75e-21	-1	5e-20
1yrs	C	A06AB	Contact laxatives	1189	129	387741	5401	1.53549	0.117714	13.0442	4.64359	3.68685	5.84861	6.98e-39	-1	6.98e-37
1yrs	C	A06AC	Bulk-forming laxatives	1309	9	390620	2522	-0.230573	0.408962	-0.563799	0.794079	0.356249	1.77	0.573	0	0.714
1yrs	C	A06AD	Osmotically acting laxatives	1101	217	375078	18064	1.18437	0.0877414	13.4984	3.26862	2.75219	3.88195	1.63e-41	-1	3.26e-39
1yrs	C	A06AG	Enemas	1309	9	392795	347	1.59998	0.406619	3.93484	4.95293	2.23227	10.9895	8.33e-05	-1	0.000348
1yrs	C	A06AX	Other drugs for constipation	1309	9	392179	963	0.471357	0.434873	1.0839	1.60217	0.683192	3.75728	0.278	0	0.406
1yrs	C	A07AA	Antibiotics	1284	34	390951	2191	1.18806	0.212061	5.60245	3.28071	2.16501	4.97136	2.12e-08	-1	1.93e-07
1yrs	C	A07DA	Antipropulsives	1274	44	389087	4055	0.780654	0.189474	4.1201	2.1829	1.50575	3.16457	3.79e-05	-1	0.000176
1yrs	C	A07EC	Aminosalicylic acid and similar agents	1300	18	389491	3651	0.217248	0.259404	0.837491	1.24265	0.747385	2.06612	0.402	0	0.547
1yrs	C	A08AB	Peripherally acting antiobesity products	1313	5	392732	410	0.597687	0.521531	1.14602	1.81791	0.654098	5.05245	0.252	0	0.377
1yrs	C	A09AB	Acid preparations	1313	5	392980	162	1.49177	0.525047	2.8412	4.44493	1.58834	12.4391	0.00449	-1	0.012
1yrs	C	A10AB	Insulins and analogues for injection, fast-acting	1220	98	383004	10138	0.189879	0.165915	1.14443	1.2091	0.873445	1.67375	0.252	0	0.377
1yrs	C	A10AC	Insulins and analogues for injection, intermediate-acting	1305	13	391989	1153	-0.010301	0.420114	-0.0245196	0.989752	0.434434	2.25491	0.98	0	0.98
1yrs	C	A10AD	Insulins and analogues for injection, intermediate- or long-acting combined with fast-acting	1288	30	391353	1789	0.251177	0.294993	0.851467	1.28554	0.721083	2.29184	0.395	0	0.544
1yrs	C	A10AE	Insulins and analogues for injection, long-acting	1292	26	390087	3055	-0.155435	0.292816	-0.530829	0.856042	0.482224	1.51964	0.596	0	0.729
1yrs	C	A10BA	Biguanides [DG:DG01684]	1178	140	369828	23314	-0.400572	0.139206	-2.87755	0.669937	0.509966	0.880089	0.00401	1	0.0111
1yrs	C	A10BB	Sulfonylureas	1279	39	386387	6755	-0.334249	0.216873	-1.54122	0.715875	0.467988	1.09507	0.123	0	0.213
1yrs	C	A10BD	Combinations of oral blood glucose lowering drugs	1312	6	392761	381	0.616184	0.483583	1.27421	1.85185	0.717757	4.77785	0.203	0	0.319
1yrs	C	A10BG	Thiazolidinediones [DG:DG01683]	1313	5	392339	803	-0.566615	0.675221	-0.839155	0.567443	0.151067	2.13144	0.401	0	0.547
1yrs	C	A10BH	Dipeptidyl peptidase 4 (DPP-4) inhibitors [DG:DG01601]	1276	42	387096	6046	-0.289958	0.224475	-1.29171	0.748295	0.481946	1.16184	0.197	0	0.312
1yrs	C	A10BJ	Glucagon-like peptide-1 receptor (GLP-1) analogues	1309	9	391309	1833	-1.07885	0.518366	-2.08126	0.339985	0.12309	0.939063	0.0374	1	0.0788
1yrs	C	A10BK	Sodium-glucose co-transporter 2 (SGLT2) inhibitors	1296	22	389384	3758	-0.254135	0.266248	-0.954506	0.775587	0.460256	1.30696	0.34	0	0.482
1yrs	C	A11CC	Vitamin D and analogues	1243	75	384921	8221	0.607303	0.141264	4.29906	1.83547	1.39157	2.42099	1.72e-05	-1	8.82e-05
1yrs	C	A11DA	Vitamin B1, plain	1283	35	391551	1591	1.24255	0.220097	5.64545	3.46442	2.25052	5.33308	1.65e-08	-1	1.57e-07
1yrs	C	A11EX	Vitamin B-complex, other combinations	1309	9	392234	908	0.300175	0.409793	0.732503	1.35009	0.604709	3.01427	0.464	0	0.614
1yrs	C	A12AA	Calcium	1310	8	392405	737	0.588048	0.481324	1.22173	1.80047	0.70094	4.62478	0.222	0	0.339
1yrs	C	A12AX	Calcium, combinations with vitamin D and/or other drugs	1136	182	358488	34654	0.200232	0.100031	2.00169	1.22169	1.00418	1.4863	0.0453	-1	0.0925
1yrs	C	A12BA	Potassium	1313	5	392823	319	1.0936	0.561074	1.94911	2.98499	0.993925	8.9646	0.0513	0	0.104
1yrs	C	B01AA	Vitamin K antagonists	1279	39	386684	6458	-0.0232702	0.217076	-0.107198	0.976998	0.638436	1.4951	0.915	0	0.938
1yrs	C	B01AB	Heparin group	1309	9	392437	705	1.10301	0.386799	2.85163	3.01321	1.41184	6.43093	0.00435	-1	0.0118
1yrs	C	B01AC	Platelet aggregation inhibitors excl. heparin	1087	231	349128	44014	-0.194	0.103669	-1.87134	0.823658	0.672208	1.00923	0.0613	0	0.121
1yrs	C	B01AF	Direct factor Xa inhibitors	1197	121	376098	17044	0.395707	0.120524	3.28321	1.48543	1.1729	1.88124	0.00103	-1	0.00336
1yrs	C	B03AA	Iron bivalent, oral preparations	1219	99	385045	8097	0.708805	0.136111	5.20757	2.03156	1.55587	2.6527	1.91e-07	-1	1.41e-06
1yrs	C	B03BA	Vitamin B12 (cyanocobalamin and analogues)	1247	71	384889	8253	0.51575	0.148807	3.4659	1.67489	1.25119	2.24209	0.000528	-1	0.00185
1yrs	C	B03BB	Folic acid and derivatives	1223	95	384571	8571	0.683087	0.137553	4.966	1.97998	1.51208	2.59267	6.84e-07	-1	4.72e-06
1yrs	C	B05CB	Salt solutions	1303	15	392623	519	1.6268	0.3341	4.86919	5.08755	2.64315	9.79256	1.12e-06	-1	6.79e-06
1yrs	C	B05XA	Electrolyte solutions	1312	6	392688	454	0.321525	0.58493	0.549681	1.37923	0.43827	4.34041	0.583	0	0.719
1yrs	C	C01AA	Digitalis glycosides [DG:DG01697]	1302	16	390817	2325	0.134837	0.328438	0.410538	1.14435	0.601161	2.17835	0.681	0	0.77
1yrs	C	C01CA	Adrenergic and dopaminergic agents	1311	7	392126	1016	0.856952	0.385128	2.22511	2.35597	1.10751	5.01178	0.0261	-1	0.0579
1yrs	C	C01DA	Organic nitrates	1224	94	382471	10671	0.238582	0.156527	1.52423	1.26945	0.934068	1.72525	0.128	0	0.218
1yrs	C	C01DX	Other vasodilators used in cardiac diseases	1305	13	391581	1561	-0.307655	0.415491	-0.740463	0.735169	0.325626	1.65979	0.459	0	0.612
1yrs	C	C01EB	Other cardiac preparations	1308	10	391956	1186	0.0105731	0.421475	0.0250859	1.01063	0.442416	2.30862	0.98	0	0.98
1yrs	C	C02AC	Imidazoline receptor agonists	1313	5	392549	593	0.257568	0.56507	0.455816	1.29378	0.427435	3.91607	0.648	0	0.745
1yrs	C	C02CA	Alpha-adrenoreceptor antagonists	1272	46	384232	8910	-0.214582	0.190458	-1.12666	0.806879	0.555507	1.172	0.26	0	0.385
1yrs	C	C03AA	Thiazides, plain [DG:DG01749]	1264	54	377052	16090	-0.308844	0.165937	-1.86121	0.734295	0.530426	1.01652	0.0627	0	0.122
1yrs	C	C03BA	Sulfonamides, plain	1275	43	384490	8652	-0.0724441	0.192578	-0.376181	0.930118	0.637698	1.35663	0.707	0	0.785
1yrs	C	C03CA	Sulfonamides, plain	1174	144	381915	11227	0.73892	0.123783	5.96949	2.09367	1.64265	2.66854	2.38e-09	-1	2.51e-08
1yrs	C	C03DA	Aldosterone antagonists	1289	29	389430	3712	0.118263	0.248526	0.475858	1.12554	0.691536	1.83192	0.634	0	0.738
1yrs	C	C05AX	Other agents for treatment of hemorrhoids and anal fissures for topical use	1295	23	389099	4043	0.141819	0.252728	0.561151	1.15237	0.702212	1.8911	0.575	0	0.714
1yrs	C	C07AA	Beta blocking agents, non-selective	1299	19	388281	4861	0.350773	0.219601	1.59732	1.42016	0.923451	2.18406	0.11	0	0.195
1yrs	C	C07AB	Beta blocking agents, selective	1104	214	350509	42633	-0.159133	0.102907	-1.54638	0.852883	0.697099	1.04348	0.122	0	0.212
1yrs	C	C07AG	Alpha and beta blocking agents	1310	8	392574	568	0.608964	0.490004	1.24277	1.83853	0.703681	4.80356	0.214	0	0.33
1yrs	C	C08CA	Dihydropyridine derivatives [DG:DG01928]	1066	252	327494	65648	-0.278899	0.086789	-3.21353	0.756616	0.638264	0.896914	0.00131	1	0.00423
1yrs	C	C08DB	Benzothiazepine derivatives	1307	11	389438	3704	-0.725924	0.380747	-1.90658	0.483877	0.229426	1.02054	0.0566	0	0.113
1yrs	C	C09AA	ACE inhibitors, plain [DG:DG01501]	1098	220	331703	61439	-0.488408	0.0931624	-5.24255	0.613602	0.511195	0.736525	1.59e-07	1	1.25e-06
1yrs	C	C09CA	Angiotensin II receptor blockers, plain [DG:DG01495]	1195	123	358901	34241	-0.391624	0.11629	-3.36764	0.675958	0.538186	0.848998	0.000758	1	0.00261
1yrs	C	C10AA	HMG CoA reductase inhibitors [DG:DG01660]	854	464	255620	137522	-0.716256	0.0756799	-9.46428	0.488578	0.421226	0.5667	2.97e-21	1	7.42e-20
1yrs	C	C10AB	Fibrates	1308	10	391471	1671	-0.120039	0.408418	-0.293913	0.886885	0.39831	1.97476	0.769	0	0.836
1yrs	C	C10AC	Bile acid sequestrants	1312	6	392386	756	0.870108	0.414355	2.09991	2.38717	1.0597	5.37754	0.0357	-1	0.0769
1yrs	C	C10AX	Other lipid modifying agents	1297	21	388838	4304	-0.202619	0.278316	-0.728019	0.816589	0.47326	1.40899	0.467	0	0.614
1yrs	C	D01AC	Imidazole and triazole derivatives	1213	105	380909	12233	0.58671	0.121902	4.81298	1.79806	1.41593	2.28333	1.49e-06	-1	8.76e-06
1yrs	C	D01AE	Other antifungals for topical use	1299	19	390817	2325	0.707327	0.253256	2.79294	2.02856	1.23486	3.33243	0.00522	-1	0.0137
1yrs	C	D01AX		1273	45	388248	4894	0.674609	0.17692	3.81308	1.96327	1.38798	2.77699	0.000137	-1	0.000518
1yrs	C	D01BA	Antifungals for systemic use	1306	12	391754	1388	1.09377	0.280044	3.90569	2.9855	1.72441	5.16882	9.4e-05	-1	0.000376
1yrs	C	D02AC	Soft paraffin and fat products	1287	31	386841	6301	-0.104789	0.231982	-0.45171	0.900515	0.571514	1.41891	0.651	0	0.745
1yrs	C	D02AE	Carbamide products	1306	12	391360	1782	0.239185	0.352475	0.678587	1.27021	0.636574	2.53457	0.497	0	0.642
1yrs	C	D02AX	Other emollients and protectives	1137	181	371138	22004	0.524818	0.0983927	5.33391	1.69015	1.39371	2.04964	9.62e-08	-1	8.37e-07
1yrs	C	D05AX	Other antipsoriatics for topical use	1301	17	389483	3659	0.0581266	0.285102	0.20388	1.05985	0.606127	1.85321	0.838	0	0.887
1yrs	C	D06AX	Other antibiotics for topical use	1295	23	390094	3048	0.565767	0.240611	2.35137	1.7608	1.09875	2.82175	0.0187	-1	0.0435
1yrs	C	D06BA	Sulfonamides	1313	5	393046	96	2.59586	0.48789	5.3206	13.4082	5.15319	34.887	1.04e-07	-1	8.67e-07
1yrs	C	D06BB	Antivirals	1313	5	392392	750	0.683407	0.467093	1.46311	1.98061	0.792881	4.94756	0.143	0	0.239
1yrs	C	D07AA	Corticosteroids, weak (group I)	1281	37	388016	5126	0.62247	0.188624	3.30007	1.86353	1.28759	2.69707	0.000967	-1	0.00322
1yrs	C	D07AB	Corticosteroids, moderately potent (group II)	1284	34	388587	4555	0.693885	0.192253	3.60923	2.00148	1.37311	2.91741	0.000307	-1	0.00112
1yrs	C	D07AC	Corticosteroids, potent (group III)	1243	75	379641	13501	0.25636	0.139535	1.83725	1.29222	0.983022	1.69867	0.0662	0	0.125
1yrs	C	D07AD	Corticosteroids, very potent (group IV)	1293	25	388579	4563	0.532212	0.211773	2.51313	1.7027	1.12428	2.57869	0.012	-1	0.0288
1yrs	C	D07BC	Corticosteroids, potent, combinations with antiseptics	1313	5	392459	683	0.342429	0.543194	0.630399	1.40836	0.485675	4.08398	0.528	0	0.674
1yrs	C	D07CA	Corticosteroids, weak, combinations with antibiotics	1306	12	391362	1780	0.578626	0.322064	1.79662	1.78359	0.94875	3.35302	0.0724	0	0.134
1yrs	C	D07CC	Corticosteroids, potent, combinations with antibiotics	1284	34	389723	3419	0.641906	0.217807	2.94713	1.9001	1.23988	2.91188	0.00321	-1	0.00944
1yrs	C	D07CD	Corticosteroids, very potent, combinations with antibiotics	1311	7	392226	916	0.450844	0.461289	0.977358	1.56964	0.635548	3.87659	0.328	0	0.469
1yrs	C	D09AA	Medicated dressings with antiinfectives	1304	14	392555	587	1.56339	0.33071	4.72738	4.77499	2.4973	9.13007	2.28e-06	-1	1.27e-05
1yrs	C	D11AC	Medicated shampoos	1309	9	391693	1449	-0.244686	0.493303	-0.496015	0.782951	0.297737	2.0589	0.62	0	0.738
1yrs	C	G01AF	Imidazole derivatives	1288	30	390877	2265	0.915498	0.235474	3.8879	2.49802	1.57456	3.96307	0.000101	-1	0.000395
1yrs	C	G03BA	3-oxoandrosten (4) derivatives	1311	7	391967	1175	0.0499008	0.43467	0.114801	1.05117	0.448413	2.46414	0.909	0	0.938
1yrs	C	G03CA	Natural and semisynthetic estrogens, plain	1269	49	371957	21185	-0.0754958	0.149508	-0.504962	0.927284	0.691753	1.24301	0.614	0	0.735
1yrs	C	G03FA	Progestogens and estrogens, fixed combinations	1313	5	392132	1010	1.10615	0.353029	3.13331	3.02269	1.51319	6.038	0.00173	-1	0.00532
1yrs	C	G03FB	Progestogens and estrogens, sequential preparations	1311	7	391500	1642	0.686274	0.338456	2.02766	1.9863	1.02317	3.85603	0.0426	-1	0.0878
1yrs	C	G04BD	Urinary antispasmodics	1267	51	382123	11019	0.00995539	0.166558	0.0597714	1.01001	0.7287	1.3999	0.952	0	0.967
1yrs	C	G04BE	Drugs used in erectile dysfunction	1256	62	380209	12933	0.131214	0.141756	0.925629	1.14021	0.863618	1.50539	0.355	0	0.496
1yrs	C	G04CA	Alpha-adrenoreceptor antagonists	1310	8	391718	1424	0.0743598	0.423212	0.175703	1.07719	0.469953	2.46907	0.861	0	0.906
1yrs	C	G04CB	Testosterone-5-alpha reductase inhibitors	1280	38	384405	8737	-0.221449	0.207724	-1.06607	0.801357	0.533348	1.20404	0.286	0	0.415
1yrs	C	H02AA	Mineralocorticoids	1310	8	392620	522	0.884004	0.489977	1.80417	2.42057	0.926504	6.32396	0.0712	0	0.133
1yrs	C	H02AB	Glucocorticoids	1140	178	372897	20245	0.815052	0.0987316	8.25522	2.25929	1.86179	2.74166	1.52e-16	-1	2.34e-15
1yrs	C	H02BX	Corticosteroids for systemic use, combinations	1307	11	391287	1855	0.384913	0.343352	1.12105	1.46949	0.749727	2.88024	0.262	0	0.386
1yrs	C	H03AA	Thyroid hormones	1234	84	359009	34133	-0.482573	0.128709	-3.74934	0.617193	0.479583	0.794289	0.000177	1	0.000657
1yrs	C	J01AA	Tetracyclines [DG:DG01197]	1159	159	376970	16172	0.915709	0.100013	9.15587	2.49855	2.05379	3.03962	5.42e-20	-1	1.2e-18
1yrs	C	J01CA	Penicillins with extended spectrum [DG:DG01780]	1064	254	366276	26866	0.974794	0.0799004	12.2001	2.65062	2.2664	3.09998	3.15e-34	-1	2.1e-32
1yrs	C	J01CE	Beta-lactamase sensitive penicillins [DG:DG01778]	1305	13	390434	2708	0.220192	0.304666	0.722734	1.24632	0.685955	2.26444	0.47	0	0.614
1yrs	C	J01CF	Beta-lactamase resistant penicillins [DG:DG01779]	1180	138	380509	12633	0.996693	0.104448	9.5425	2.70931	2.20776	3.32479	1.4e-21	-1	4.67e-20
1yrs	C	J01CR	Combinations of penicillins, incl. beta-lactamase inhibitors	1245	73	388192	4950	1.24438	0.143368	8.67963	3.47079	2.62055	4.59688	3.99e-18	-1	6.65e-17
1yrs	C	J01DB	First-generation cephalosporins [DG:DG01774]	1295	23	390749	2393	0.697902	0.267331	2.61063	2.00953	1.18999	3.3935	0.00904	-1	0.0229
1yrs	C	J01EA	Trimethoprim and derivatives [DG:DG01581]	1275	43	388287	4855	0.843008	0.176487	4.7766	2.32335	1.64395	3.28352	1.78e-06	-1	1.02e-05
1yrs	C	J01EE	Combinations of sulfonamides and trimethoprim, incl. derivatives	1311	7	392714	428	1.28532	0.442887	2.90215	3.61584	1.51782	8.61383	0.00371	-1	0.0107
1yrs	C	J01FA	Macrolides [DG:DG01551]	1235	83	384061	9081	0.78587	0.132068	5.95051	2.19431	1.69388	2.8426	2.68e-09	-1	2.68e-08
1yrs	C	J01FF	Lincosamides [DG:DG01578]	1308	10	392803	339	1.26815	0.495298	2.56039	3.55428	1.34633	9.38321	0.0105	-1	0.0258
1yrs	C	J01MA	Fluoroquinolones [DG:DG01549]	1296	22	390677	2465	0.646383	0.256054	2.5244	1.90863	1.15549	3.15264	0.0116	-1	0.0283
1yrs	C	J01XE	Nitrofuran derivatives	1176	142	374700	18442	0.881303	0.0997852	8.832	2.41404	1.98521	2.9355	1.03e-18	-1	1.87e-17
1yrs	C	J01XX	Other antibacterials	1312	6	392416	726	0.279312	0.594624	0.469729	1.32222	0.412247	4.24083	0.638	0	0.738
1yrs	C	J02AC	Triazole derivatives	1295	23	391058	2084	1.06953	0.233049	4.58927	2.914	1.84551	4.6011	4.45e-06	-1	2.41e-05
1yrs	C	J05AB	Nucleosides and nucleotides excl. reverse transcriptase inhibitors [DG:DG02840]	1298	20	389680	3462	0.537212	0.242296	2.21717	1.71123	1.0643	2.75138	0.0266	-1	0.0585
1yrs	C	J07AL	Pneumococcal vaccines	1312	6	391126	2016	-0.123492	0.437184	-0.282472	0.883829	0.375176	2.0821	0.778	0	0.841
1yrs	C	J07BB	Influenza vaccines	1189	129	346811	46331	-0.301061	0.104017	-2.89434	0.740033	0.603547	0.907383	0.0038	1	0.0108
1yrs	C	J07CA	Bacterial and viral vaccines, combined	1310	8	390013	3129	-0.373327	0.403223	-0.925858	0.68844	0.31235	1.51737	0.354	0	0.496
1yrs	C	L01BC	Pyrimidine analogues	1310	8	390735	2407	0.251409	0.35838	0.701514	1.28584	0.636987	2.59561	0.483	0	0.627
1yrs	C	L02AE	Gonadotropin releasing hormone analogues	1304	14	391341	1801	0.415483	0.346517	1.19903	1.5151	0.76822	2.98813	0.231	0	0.349
1yrs	C	L02BG	Aromatase inhibitors [DG:DG01596]	1307	11	389273	3869	0.0191306	0.321305	0.0595403	1.01931	0.543015	1.91339	0.953	0	0.967
1yrs	C	L04AA	Selective immunosuppressants	1311	7	392453	689	0.795432	0.431094	1.84515	2.2154	0.951705	5.15704	0.065	0	0.124
1yrs	C	L04AX	Other immunosuppressants	1302	16	388814	4328	-0.164966	0.292256	-0.564458	0.847922	0.478174	1.50358	0.572	0	0.714
1yrs	C	M01AB	Acetic acid derivatives and related substances	1307	11	391485	1657	0.51851	0.329604	1.57313	1.67952	0.880291	3.20439	0.116	0	0.203
1yrs	C	M01AE	Propionic acid derivatives	1232	86	372778	20364	0.195246	0.117029	1.66836	1.21561	0.966448	1.52901	0.0953	0	0.172
1yrs	C	M01AH	Coxibs	1309	9	391829	1313	0.521906	0.372859	1.39974	1.68524	0.811488	3.49977	0.162	0	0.267
1yrs	C	M02AA	Antiinflammatory preparations, non-steroids for topical use	1174	144	373860	19282	0.514994	0.105197	4.8955	1.67363	1.3618	2.05685	9.81e-07	-1	6.13e-06
1yrs	C	M03BA	Carbamic acid esters	1313	5	392985	157	1.3483	0.654426	2.06028	3.85088	1.06785	13.8871	0.0394	-1	0.082
1yrs	C	M03BX	Other centrally acting agents	1304	14	392115	1027	1.21623	0.285333	4.26247	3.37443	1.92896	5.90306	2.02e-05	-1	0.000101
1yrs	C	M04AA	Preparations inhibiting uric acid production	1261	57	382946	10196	-0.272824	0.183702	-1.48515	0.761227	0.531063	1.09114	0.138	0	0.231
1yrs	C	M04AC	Preparations with no effect on uric acid metabolism	1299	19	390923	2219	0.366201	0.292946	1.25006	1.44224	0.812236	2.56092	0.211	0	0.33
1yrs	C	M05BA	Bisphosphonates [DG:DG01600]	1245	73	379446	13696	0.44684	0.14246	3.1366	1.56336	1.18249	2.06692	0.00171	-1	0.00532
1yrs	C	N01BB	Amides	1287	31	389255	3887	0.79383	0.198903	3.99104	2.21185	1.49778	3.26635	6.58e-05	-1	0.000292
1yrs	C	N01BX	Other local anesthetics	1313	5	392299	843	-0.352665	0.692223	-0.509468	0.702812	0.180974	2.72937	0.61	0	0.735
1yrs	C	N02AA	Natural opium alkaloids	1220	98	387416	5726	1.3139	0.127872	10.2751	3.72066	2.89584	4.78041	9.19e-25	-1	3.68e-23
1yrs	C	N02AB	Phenylpiperidine derivatives	1305	13	392557	585	1.23769	0.350134	3.5349	3.44764	1.73575	6.8479	0.000408	-1	0.00146
1yrs	C	N02AE	Oripavine derivatives	1290	28	391173	1969	0.701324	0.258525	2.71279	2.01642	1.21485	3.34687	0.00667	-1	0.0171
1yrs	C	N02AJ	Opioids in combination with non-opioid analgesics	1178	140	369619	23523	0.236541	0.105462	2.2429	1.26686	1.03029	1.55775	0.0249	-1	0.056
1yrs	C	N02AX	Other opioids	1269	49	386054	7088	0.0940173	0.185323	0.507317	1.09858	0.763983	1.57971	0.612	0	0.735
1yrs	C	N02BE	Anilides	948	370	343710	49432	0.55556	0.0768789	7.22643	1.74292	1.49912	2.02636	4.97e-13	-1	6.21e-12
1yrs	C	N02BG	Other analgesics and antipyretics	1310	8	392568	574	1.12422	0.407134	2.76131	3.07782	1.38576	6.83592	0.00576	-1	0.015
1yrs	C	N02CC	Selective serotonin (5HT1) agonists [DG:DG01943]	1306	12	388010	5132	-0.139264	0.283686	-0.490908	0.869999	0.498935	1.51703	0.624	0	0.738
1yrs	C	N03AB	Hydantoin derivatives	1313	5	392648	494	0.732181	0.535928	1.36619	2.07961	0.727441	5.9452	0.172	0	0.282
1yrs	C	N03AE	Benzodiazepine derivatives	1313	5	392419	723	0.0624081	0.582491	0.10714	1.0644	0.339848	3.33367	0.915	0	0.938
1yrs	C	N03AF	Carboxamide derivatives	1307	11	391462	1680	0.224088	0.369699	0.606137	1.25118	0.606221	2.58232	0.544	0	0.689
1yrs	C	N03AG	Fatty acid derivatives	1308	10	391816	1326	-0.180539	0.460173	-0.392329	0.83482	0.33876	2.05728	0.695	0	0.781
1yrs	C	N03AX	Other antiepileptics	1163	155	376275	16867	0.534141	0.108917	4.90409	1.70598	1.37805	2.11196	9.39e-07	-1	6.06e-06
1yrs	C	N04BA	Dopa and dopa derivatives	1294	24	390648	2494	0.939205	0.230778	4.06973	2.55795	1.62724	4.02097	4.71e-05	-1	0.000214
1yrs	C	N04BB	Adamantane derivatives	1313	5	392894	248	1.40739	0.567742	2.47892	4.08528	1.34263	12.4304	0.0132	-1	0.0314
1yrs	C	N04BC	Dopamine agonists	1302	16	391402	1740	0.690985	0.302555	2.28383	1.99568	1.10295	3.61099	0.0224	-1	0.0514
1yrs	C	N04BD	Monoamine oxidase B inhibitors	1311	7	392557	585	1.3305	0.400999	3.31795	3.78292	1.72383	8.30156	0.000907	-1	0.00307
1yrs	C	N05AB	Phenothiazines with piperazine structure	1281	37	388165	4977	0.749892	0.180404	4.15675	2.11677	1.48632	3.01463	3.23e-05	-1	0.000154
1yrs	C	N05AD	Butyrophenone derivatives [DG:DG01940]	1310	8	392921	221	1.76023	0.447443	3.93398	5.8138	2.41877	13.9741	8.36e-05	-1	0.000348
1yrs	C	N05AH	Diazepines, oxazepines and thiazepines	1307	11	391546	1596	0.124417	0.361635	0.34404	1.13249	0.557454	2.30069	0.731	0	0.806
1yrs	C	N05AX	Other antipsychotics	1295	23	392299	843	1.36929	0.261372	5.23888	3.93257	2.35611	6.56383	1.62e-07	-1	1.25e-06
1yrs	C	N05BA	Benzodiazepine derivatives [DG:DG01914]	1248	70	387526	5616	1.20284	0.136101	8.83788	3.32958	2.54999	4.34749	9.79e-19	-1	1.87e-17
1yrs	C	N05CD	Benzodiazepine derivatives	1281	37	391787	1355	1.99186	0.186355	10.6885	7.32917	5.08661	10.5604	1.16e-26	-1	5.8e-25
1yrs	C	N05CF	Benzodiazepine related drugs	1275	43	386905	6237	0.534375	0.17605	3.03537	1.70638	1.20843	2.40952	0.0024	-1	0.00717
1yrs	C	N05CH	Melatonin receptor agonists	1309	9	392576	566	1.02473	0.416462	2.46057	2.78636	1.23181	6.30276	0.0139	-1	0.0326
1yrs	C	N06AA	Non-selective monoamine reuptake inhibitors [DG:DG01730]	1209	109	371462	21680	0.0891659	0.120085	0.742522	1.09326	0.863987	1.38338	0.458	0	0.612
1yrs	C	N06AB	Selective serotonin reuptake inhibitors	1178	140	363943	29199	0.0478729	0.110934	0.431544	1.04904	0.844041	1.30382	0.666	0	0.757
1yrs	C	N06AX	Other antidepressants	1224	94	381788	11354	0.553669	0.130165	4.2536	1.73962	1.3479	2.24518	2.1e-05	-1	0.000102
1yrs	C	N06DA	Anticholinesterases	1286	32	391006	2136	1.13337	0.227994	4.97106	3.10611	1.98677	4.85608	6.66e-07	-1	4.72e-06
1yrs	C	N06DX	Other anti-dementia drugs	1285	33	392134	1008	1.8622	0.237076	7.8549	6.43792	4.04525	10.2458	4.01e-15	-1	5.73e-14
1yrs	C	N07CA	Antivertigo preparations	1296	22	389008	4134	-0.153503	0.291103	-0.527316	0.857698	0.484782	1.51748	0.598	0	0.729
1yrs	C	P01AB	Nitroimidazole derivatives	1301	17	391444	1698	1.13001	0.249231	4.53397	3.09567	1.89937	5.04547	5.79e-06	-1	3.05e-05
1yrs	C	P01BA	Aminoquinolines	1308	10	391238	1904	0.173565	0.369033	0.470323	1.18954	0.577106	2.45189	0.638	0	0.738
1yrs	C	P01BC	Methanolquinolines	1287	31	388653	4489	0.145977	0.232125	0.628874	1.15717	0.734195	1.82382	0.529	0	0.674
1yrs	C	P03AC	Pyrethrines, incl. synthetic compounds	1313	5	392826	316	0.849943	0.625693	1.3584	2.33951	0.68633	7.97477	0.174	0	0.283
1yrs	C	R01AD	Corticosteroids	1220	98	367822	25320	0.0290739	0.115644	0.25141	1.0295	0.820711	1.29141	0.801	0	0.857
1yrs	C	R01AX	Other nasal preparations	1313	5	392641	501	0.945585	0.505793	1.86951	2.57432	0.955278	6.93738	0.0616	0	0.121
1yrs	C	R03AC	Selective beta-2-adrenoreceptor agonists	1110	208	354667	38475	0.199752	0.10758	1.85679	1.2211	0.988961	1.50773	0.0633	0	0.122
1yrs	C	R03AK	Adrenergics in combination with corticosteroids or other drugs, excl. anticholinergics	1215	103	372482	20660	-0.0175829	0.140516	-0.125131	0.982571	0.74603	1.29411	0.9	0	0.938
1yrs	C	R03AL	Adrenergics in combination with anticholinergics incl. triple combinations with corticosteroids	1291	27	390049	3093	0.348424	0.262925	1.32518	1.41683	0.846283	2.37204	0.185	0	0.296
1yrs	C	R03BA	Glucocorticoids	1278	40	378273	14869	-0.389094	0.185742	-2.09481	0.67767	0.470884	0.975265	0.0362	1	0.077
1yrs	C	R03BB	Anticholinergics	1273	45	386934	6208	0.0523358	0.219425	0.238514	1.05373	0.685416	1.61996	0.811	0	0.863
1yrs	C	R03DA	Xanthines	1313	5	392614	528	-0.27769	0.736213	-0.377187	0.757532	0.178951	3.20677	0.706	0	0.785
1yrs	C	R03DC	Leukotriene receptor antagonists	1307	11	389572	3570	-0.595679	0.372799	-1.59786	0.551188	0.265444	1.14453	0.11	0	0.195
1yrs	C	R05CB	Mucolytics	1282	36	389370	3772	0.394499	0.23415	1.68481	1.48364	0.937604	2.34767	0.092	0	0.167
1yrs	C	R05DA	Opium alkaloids and derivatives	1228	90	381378	11764	0.621673	0.125362	4.95902	1.86204	1.4564	2.38066	7.09e-07	-1	4.73e-06
1yrs	C	R06AB	Substituted alkylamines	1305	13	392038	1104	0.952267	0.313164	3.04079	2.59158	1.40281	4.78774	0.00236	-1	0.00715
1yrs	C	R06AD	Phenothiazine derivatives	1303	15	391969	1173	0.818769	0.316611	2.58604	2.26771	1.21923	4.21781	0.00971	-1	0.0243
1yrs	C	R06AE	Piperazine derivatives	1218	100	383627	9515	0.86723	0.122908	7.05591	2.38031	1.87074	3.02868	1.72e-12	-1	2.02e-11
1yrs	C	R06AX	Other antihistamines for systemic use	1266	52	381954	11188	0.0232866	0.16488	0.141234	1.02356	0.740912	1.41403	0.888	0	0.93
1yrs	C	S01AA	Antibiotics	1281	37	388835	4307	0.642154	0.202168	3.17635	1.90057	1.27879	2.82468	0.00149	-1	0.00474
1yrs	C	S01BA	Corticosteroids, plain	1309	9	391295	1847	0.106693	0.385298	0.27691	1.11259	0.52284	2.36758	0.782	0	0.841
1yrs	C	S01EC	Carbonic anhydrase inhibitors	1307	11	389719	3423	-0.362189	0.36716	-0.986461	0.696151	0.338981	1.42966	0.324	0	0.466
1yrs	C	S01ED	Beta blocking agents	1308	10	388022	5120	-0.853004	0.390861	-2.18237	0.426133	0.198081	0.916743	0.0291	1	0.0632
1yrs	C	S01EE	Prostaglandin analogues	1295	23	384759	8383	-0.600112	0.265697	-2.25864	0.54875	0.325996	0.923713	0.0239	1	0.0543
1yrs	C	S01GX	Other antiallergics	1305	13	390640	2502	-0.11695	0.34886	-0.335235	0.889629	0.449012	1.76263	0.737	0	0.806
1yrs	C	S01XA	Other ophthalmologicals	1236	82	371393	21749	-0.167437	0.134874	-1.24143	0.84583	0.649348	1.10176	0.214	0	0.33
1yrs	C	S02AA	Antiinfectives	1310	8	391880	1262	0.211611	0.441002	0.479841	1.23567	0.520617	2.93281	0.631	0	0.738
1yrs	C	S02CA	Corticosteroids and antiinfectives in combination	1313	5	392018	1124	-0.0235051	0.525349	-0.0447419	0.976769	0.348829	2.73509	0.964	0	0.974
1yrs	C	V03AE	Drugs for treatment of hyperkalemia and hyperphosphatemia	1307	11	393007	135	2.064	0.531428	3.88388	7.87745	2.77991	22.3223	0.000103	-1	0.000395
1yrs	C	V06DC	Carbohydrates	1307	11	392811	331	0.897245	0.520264	1.72459	2.45284	0.884744	6.80017	0.0846	0	0.155
1yrs	C	V07AY	Other non-therapeutic auxiliary products	1229	89	381878	11264	0.200514	0.148797	1.34757	1.22203	0.912905	1.63583	0.178	0	0.287
1yrs	D	A01AB	Antiinfectives and antiseptics for local oral treatment	164	6	385401	7741	0.502872	0.455685	1.10355	1.65346	0.676883	4.03902	0.27	0	0.371
1yrs	D	A02BA	H2-receptor antagonists [DG:DG01481]	161	9	386194	6948	0.557071	0.422075	1.31984	1.74555	0.76324	3.99213	0.187	0	0.265
1yrs	D	A02BC	Proton pump inhibitors [DG:DG01646]	104	66	283814	109328	-0.0544062	0.194796	-0.279298	0.947047	0.646488	1.38734	0.78	0	0.842
1yrs	D	A02BX	Other drugs for peptic ulcer and gastro-oesophageal reflux disease (GORD)	159	11	383722	9420	0.664788	0.357073	1.86177	1.94408	0.965543	3.91432	0.0626	0	0.112
1yrs	D	A03BB	Belladonna alkaloids, semisynthetic, quaternary ammonium compounds	152	18	390072	3070	2.57824	0.281024	9.17446	13.174	7.59464	22.852	4.56e-20	-1	1.08e-18
1yrs	D	A03FA	Propulsives [DG:DG01763]	162	8	391336	1806	2.27331	0.415077	5.47683	9.71147	4.30496	21.9079	4.33e-08	-1	3.43e-07
1yrs	D	A06AA	Softeners, emollients	158	12	389191	3951	1.39671	0.342178	4.08182	4.04188	2.0669	7.90401	4.47e-05	-1	0.00017
1yrs	D	A06AB	Contact laxatives	134	36	387741	5401	2.26436	0.234731	9.64665	9.625	6.07571	15.2477	5.11e-22	-1	1.62e-20
1yrs	D	A06AD	Osmotically acting laxatives	121	49	375078	18064	1.60003	0.203273	7.87132	4.95319	3.3255	7.37755	3.52e-15	-1	6.69e-14
1yrs	D	A07AA	Antibiotics	163	7	390951	2191	1.65611	0.482886	3.42961	5.2389	2.03332	13.4982	0.000605	-1	0.00174
1yrs	D	A07DA	Antipropulsives	161	9	389087	4055	1.18241	0.403916	2.92737	3.26223	1.47809	7.19995	0.00342	-1	0.00792
1yrs	D	A10AB	Insulins and analogues for injection, fast-acting	151	19	383004	10138	0.664998	0.410591	1.61961	1.94449	0.869578	4.34812	0.105	0	0.164
1yrs	D	A10AD	Insulins and analogues for injection, intermediate- or long-acting combined with fast-acting	164	6	391353	1789	0.515952	0.656082	0.786414	1.67523	0.463037	6.06087	0.432	0	0.526
1yrs	D	A10AE	Insulins and analogues for injection, long-acting	163	7	390087	3055	0.502293	0.595092	0.844059	1.65251	0.514752	5.30504	0.399	0	0.492
1yrs	D	A10BA	Biguanides [DG:DG01684]	153	17	369828	23314	-0.704616	0.394789	-1.78479	0.494298	0.228004	1.07161	0.0743	0	0.126
1yrs	D	A10BB	Sulfonylureas	163	7	386387	6755	-0.134436	0.531834	-0.252779	0.874208	0.308259	2.47922	0.8	0	0.848
1yrs	D	A10BH	Dipeptidyl peptidase 4 (DPP-4) inhibitors [DG:DG01601]	163	7	387096	6046	-0.459188	0.607669	-0.755656	0.631796	0.192011	2.07887	0.45	0	0.541
1yrs	D	A11CC	Vitamin D and analogues	156	14	384921	8221	1.14315	0.322897	3.54029	3.13664	1.66576	5.9063	0.0004	-1	0.00127
1yrs	D	A11DA	Vitamin B1, plain	160	10	391551	1591	2.13828	0.398843	5.36121	8.48487	3.88283	18.5414	8.27e-08	-1	5.61e-07
1yrs	D	A12AX	Calcium, combinations with vitamin D and/or other drugs	138	32	358488	34654	0.589865	0.241296	2.44457	1.80374	1.12404	2.89446	0.0145	-1	0.0293
1yrs	D	B01AA	Vitamin K antagonists	164	6	386684	6458	-0.513081	0.581072	-0.88299	0.598648	0.191673	1.86975	0.377	0	0.471
1yrs	D	B01AC	Platelet aggregation inhibitors excl. heparin	131	39	349128	44014	-0.218566	0.244111	-0.895354	0.803671	0.49807	1.29678	0.371	0	0.469
1yrs	D	B01AF	Direct factor Xa inhibitors	144	26	376098	17044	0.515554	0.259051	1.99016	1.67457	1.00785	2.78233	0.0466	-1	0.0851
1yrs	D	B03AA	Iron bivalent, oral preparations	150	20	385045	8097	0.956253	0.314361	3.04189	2.60193	1.40511	4.81815	0.00235	-1	0.00558
1yrs	D	B03BA	Vitamin B12 (cyanocobalamin and analogues)	160	10	384889	8253	0.557668	0.387194	1.44028	1.7466	0.817732	3.73055	0.15	0	0.222
1yrs	D	B03BB	Folic acid and derivatives	147	23	384571	8571	1.29407	0.279548	4.62917	3.64762	2.10891	6.30902	3.67e-06	-1	1.83e-05
1yrs	D	B05CB	Salt solutions	165	5	392623	519	2.48406	0.519625	4.78048	11.9898	4.33018	33.1987	1.75e-06	-1	9.24e-06
1yrs	D	C01AA	Digitalis glycosides [DG:DG01697]	164	6	390817	2325	0.835899	0.48562	1.7213	2.30689	0.890562	5.9757	0.0852	0	0.135
1yrs	D	C01DA	Organic nitrates	160	10	382471	10671	-0.0318417	0.393412	-0.0809372	0.96866	0.44802	2.09433	0.935	0	0.935
1yrs	D	C02CA	Alpha-adrenoreceptor antagonists	164	6	384232	8910	-0.641618	0.535665	-1.1978	0.52644	0.184242	1.50421	0.231	0	0.323
1yrs	D	C03AA	Thiazides, plain [DG:DG01749]	161	9	377052	16090	-0.275747	0.392722	-0.702142	0.759005	0.351526	1.63882	0.483	0	0.566
1yrs	D	C03BA	Sulfonamides, plain	159	11	384490	8652	0.379508	0.406221	0.93424	1.46157	0.659236	3.24038	0.35	0	0.456
1yrs	D	C03CA	Sulfonamides, plain	140	30	381915	11227	0.849644	0.269963	3.14726	2.33881	1.37785	3.96999	0.00165	-1	0.00423
1yrs	D	C07AB	Beta blocking agents, selective	129	41	350509	42633	0.0586964	0.235648	0.249084	1.06045	0.6682	1.68297	0.803	0	0.848
1yrs	D	C08CA	Dihydropyridine derivatives [DG:DG01928]	133	37	327494	65648	-0.462721	0.232403	-1.99103	0.629568	0.399227	0.992808	0.0465	1	0.0851
1yrs	D	C09AA	ACE inhibitors, plain [DG:DG01501]	135	35	331703	61439	-0.55436	0.242455	-2.28645	0.57444	0.357163	0.923895	0.0222	1	0.0431
1yrs	D	C09CA	Angiotensin II receptor blockers, plain [DG:DG01495]	148	22	358901	34241	-0.169821	0.27179	-0.624823	0.843816	0.495335	1.43746	0.532	0	0.602
1yrs	D	C10AA	HMG CoA reductase inhibitors [DG:DG01660]	91	79	255620	137522	-0.683237	0.197109	-3.46629	0.50498	0.343158	0.743111	0.000528	1	0.00157
1yrs	D	D01AC	Imidazole and triazole derivatives	148	22	380909	12233	0.867896	0.298501	2.90751	2.38189	1.3269	4.27571	0.00364	-1	0.00824
1yrs	D	D01AX		160	10	388248	4894	1.25695	0.356324	3.52755	3.51468	1.74816	7.06627	0.00042	-1	0.00129
1yrs	D	D02AE	Carbamide products	165	5	391360	1782	1.23997	0.580225	2.13705	3.45551	1.10821	10.7746	0.0326	-1	0.0619
1yrs	D	D02AX	Other emollients and protectives	130	40	371138	22004	1.07511	0.219117	4.90654	2.93031	1.90721	4.50222	9.27e-07	-1	5.18e-06
1yrs	D	D06AX	Other antibiotics for topical use	165	5	390094	3048	0.960396	0.553227	1.73599	2.61273	0.883457	7.72688	0.0826	0	0.133
1yrs	D	D07AA	Corticosteroids, weak (group I)	163	7	388016	5126	1.25408	0.397537	3.15462	3.50461	1.60788	7.63881	0.00161	-1	0.00423
1yrs	D	D07AC	Corticosteroids, potent (group III)	157	13	379641	13501	0.576464	0.331864	1.73705	1.77973	0.928691	3.41066	0.0824	0	0.133
1yrs	D	D07CC	Corticosteroids, potent, combinations with antibiotics	161	9	389723	3419	1.31682	0.419933	3.13579	3.73155	1.63848	8.49842	0.00171	-1	0.00428
1yrs	D	D09AA	Medicated dressings with antiinfectives	165	5	392555	587	2.53798	0.509756	4.97881	12.6541	4.65933	34.3666	6.4e-07	-1	3.8e-06
1yrs	D	G04BD	Urinary antispasmodics	161	9	382123	11019	0.185029	0.388744	0.475967	1.20325	0.561638	2.57785	0.634	0	0.709
1yrs	D	G04BE	Drugs used in erectile dysfunction	160	10	380209	12933	0.341614	0.363787	0.939048	1.40722	0.689769	2.8709	0.348	0	0.456
1yrs	D	G04CA	Alpha-adrenoreceptor antagonists	165	5	391718	1424	1.41182	0.508643	2.77566	4.10341	1.51421	11.12	0.00551	-1	0.0116
1yrs	D	G04CB	Testosterone-5-alpha reductase inhibitors	164	6	384405	8737	-0.900724	0.581601	-1.5487	0.406275	0.129945	1.27023	0.121	0	0.183
1yrs	D	H02AB	Glucocorticoids	140	30	372897	20245	1.04688	0.25579	4.09272	2.84874	1.72553	4.70307	4.26e-05	-1	0.000169
1yrs	D	H03AA	Thyroid hormones	150	20	359009	34133	0.19369	0.296819	0.652553	1.21372	0.678368	2.17156	0.514	0	0.592
1yrs	D	J01AA	Tetracyclines [DG:DG01197]	146	24	376970	16172	1.08841	0.265785	4.09509	2.96956	1.76382	4.99953	4.22e-05	-1	0.000169
1yrs	D	J01CA	Penicillins with extended spectrum [DG:DG01780]	128	42	366276	26866	1.28365	0.20964	6.12313	3.60979	2.39352	5.44413	9.18e-10	-1	9.69e-09
1yrs	D	J01CF	Beta-lactamase resistant penicillins [DG:DG01779]	141	29	380509	12633	1.4752	0.243176	6.06641	4.37192	2.71444	7.04149	1.31e-09	-1	1.24e-08
1yrs	D	J01CR	Combinations of penicillins, incl. beta-lactamase inhibitors	158	12	388192	4950	1.43693	0.365617	3.93016	4.20777	2.05512	8.61524	8.49e-05	-1	0.000299
1yrs	D	J01EA	Trimethoprim and derivatives [DG:DG01581]	160	10	388287	4855	0.954429	0.412231	2.31528	2.59719	1.15774	5.82635	0.0206	-1	0.0408
1yrs	D	J01FA	Macrolides [DG:DG01551]	156	14	384061	9081	1.08838	0.340926	3.19242	2.96946	1.52223	5.79262	0.00141	-1	0.00394
1yrs	D	J01MA	Fluoroquinolones [DG:DG01549]	164	6	390677	2465	1.31989	0.492952	2.67752	3.743	1.42435	9.8361	0.00742	-1	0.0153
1yrs	D	J01XE	Nitrofuran derivatives	139	31	374700	18442	1.51781	0.231057	6.56899	4.56223	2.90068	7.17553	5.07e-11	-1	6.86e-10
1yrs	D	J07BB	Influenza vaccines	162	8	346811	46331	-1.26358	0.407339	-3.10204	0.28264	0.127205	0.628003	0.00192	1	0.00468
1yrs	D	M01AE	Propionic acid derivatives	161	9	372778	20364	0.280371	0.375745	0.746173	1.32362	0.633764	2.76439	0.456	0	0.541
1yrs	D	M02AA	Antiinflammatory preparations, non-steroids for topical use	144	26	373860	19282	0.718502	0.251001	2.86254	2.05136	1.25426	3.35502	0.0042	-1	0.00914
1yrs	D	M04AA	Preparations inhibiting uric acid production	161	9	382946	10196	-0.486202	0.49246	-0.987292	0.614958	0.23424	1.61447	0.324	0	0.433
1yrs	D	M05BA	Bisphosphonates [DG:DG01600]	151	19	379446	13696	1.19509	0.285516	4.18572	3.30386	1.88794	5.78168	2.84e-05	-1	0.000123
1yrs	D	N02AA	Natural opium alkaloids	134	36	387416	5726	2.55738	0.231916	11.0272	12.902	8.18935	20.3266	2.85e-28	-1	1.35e-26
1yrs	D	N02AE	Oripavine derivatives	159	11	391173	1969	1.63086	0.417424	3.90696	5.10826	2.25403	11.5767	9.35e-05	-1	0.000317
1yrs	D	N02AJ	Opioids in combination with non-opioid analgesics	146	24	369619	23523	0.487564	0.264289	1.84481	1.62835	0.970023	2.73345	0.0651	0	0.114
1yrs	D	N02AX	Other opioids	161	9	386054	7088	0.724927	0.40277	1.79985	2.06458	0.937546	4.54643	0.0719	0	0.124
1yrs	D	N02BE	Anilides	89	81	343710	49432	1.27649	0.194896	6.54958	3.58402	2.4461	5.2513	5.78e-11	-1	6.86e-10
1yrs	D	N03AX	Other antiepileptics	137	33	376275	16867	1.07328	0.251199	4.27263	2.92495	1.78771	4.78564	1.93e-05	-1	8.73e-05
1yrs	D	N04BA	Dopa and dopa derivatives	163	7	390648	2494	1.24149	0.434019	2.86044	3.46075	1.4782	8.10231	0.00423	-1	0.00914
1yrs	D	N05AD	Butyrophenone derivatives [DG:DG01940]	164	6	392921	221	2.91811	0.542576	5.37826	18.5064	6.38967	53.5998	7.53e-08	-1	5.5e-07
1yrs	D	N05AX	Other antipsychotics	162	8	392299	843	2.45341	0.430382	5.70053	11.6279	5.00216	27.0299	1.2e-08	-1	1.04e-07
1yrs	D	N05BA	Benzodiazepine derivatives [DG:DG01914]	150	20	387526	5616	2.03411	0.279488	7.278	7.64546	4.42082	13.2222	3.39e-13	-1	5.37e-12
1yrs	D	N05CD	Benzodiazepine derivatives	145	25	391787	1355	3.39524	0.25767	13.1767	29.8218	17.9972	49.4155	1.22e-39	-1	1.16e-37
1yrs	D	N05CF	Benzodiazepine related drugs	165	5	386905	6237	0.115061	0.591056	0.194671	1.12194	0.352259	3.57338	0.846	0	0.869
1yrs	D	N06AA	Non-selective monoamine reuptake inhibitors [DG:DG01730]	156	14	371462	21680	0.118415	0.348525	0.339761	1.12571	0.56854	2.22891	0.734	0	0.801
1yrs	D	N06AB	Selective serotonin reuptake inhibitors	149	21	363943	29199	0.32146	0.309979	1.03704	1.37914	0.751194	2.532	0.3	0	0.407
1yrs	D	N06AX	Other antidepressants	153	17	381788	11354	1.14297	0.294749	3.87778	3.13608	1.75993	5.58828	0.000105	-1	0.000345
1yrs	D	N06DA	Anticholinesterases	159	11	391006	2136	1.26503	0.400411	3.15934	3.54321	1.61646	7.76656	0.00158	-1	0.00423
1yrs	D	N06DX	Other anti-dementia drugs	157	13	392134	1008	2.00159	0.401546	4.98472	7.40083	3.36886	16.2584	6.21e-07	-1	3.8e-06
1yrs	D	R01AD	Corticosteroids	163	7	367822	25320	-0.609132	0.443812	-1.3725	0.543822	0.227868	1.29787	0.17	0	0.245
1yrs	D	R03AC	Selective beta-2-adrenoreceptor agonists	148	22	354667	38475	-0.0710252	0.354121	-0.200568	0.931438	0.465291	1.86459	0.841	0	0.869
1yrs	D	R03AK	Adrenergics in combination with corticosteroids or other drugs, excl. anticholinergics	158	12	372482	20660	0.08255	0.439597	0.187786	1.08605	0.458843	2.57062	0.851	0	0.869
1yrs	D	R03AL	Adrenergics in combination with anticholinergics incl. triple combinations with corticosteroids	164	6	390049	3093	0.398158	0.615055	0.647353	1.48908	0.446047	4.97113	0.517	0	0.592
1yrs	D	R03BB	Anticholinergics	163	7	386934	6208	0.0621738	0.568402	0.109384	1.06415	0.349282	3.24211	0.913	0	0.923
1yrs	D	R05CB	Mucolytics	162	8	389370	3772	0.848877	0.487426	1.74155	2.33702	0.899009	6.07521	0.0816	0	0.133
1yrs	D	R05DA	Opium alkaloids and derivatives	158	12	381378	11764	0.553682	0.353143	1.56787	1.73965	0.870691	3.47583	0.117	0	0.179
1yrs	D	R06AE	Piperazine derivatives	151	19	383627	9515	1.31078	0.291426	4.49782	3.70906	2.09508	6.56639	6.87e-06	-1	3.26e-05
1yrs	D	R06AX	Other antihistamines for systemic use	163	7	381954	11188	0.178261	0.479838	0.371502	1.19514	0.466636	3.06096	0.71	0	0.785
1yrs	D	S01AA	Antibiotics	159	11	388835	4307	1.47484	0.371112	3.97411	4.37033	2.11165	9.04495	7.07e-05	-1	0.000258
1yrs	D	S01XA	Other ophthalmologicals	158	12	371393	21749	-0.344128	0.377122	-0.912512	0.708838	0.338485	1.48441	0.361	0	0.464
1yrs	D	V07AY	Other non-therapeutic auxiliary products	154	16	381878	11264	0.527457	0.381418	1.38288	1.69462	0.80243	3.57879	0.167	0	0.244
1yrs	E	A01AB	Antiinfectives and antiseptics for local oral treatment	3732	126	385401	7741	0.485978	0.0931581	5.2167	1.62576	1.35444	1.95144	1.82e-07	-1	1.54e-06
1yrs	E	A01AD	Other agents for local oral treatment	3826	32	391604	1538	0.62782	0.194203	3.2328	1.87352	1.28042	2.74136	0.00123	-1	0.0051
1yrs	E	A02BA	H2-receptor antagonists [DG:DG01481]	3761	97	386194	6948	0.265559	0.115191	2.30538	1.30416	1.04059	1.63449	0.0211	-1	0.0643
1yrs	E	A02BC	Proton pump inhibitors [DG:DG01646]	2610	1248	283814	109328	0.168814	0.0376711	4.48125	1.1839	1.09964	1.27462	7.42e-06	-1	4.88e-05
1yrs	E	A02BX	Other drugs for peptic ulcer and gastro-oesophageal reflux disease (GORD)	3715	143	383722	9420	0.46399	0.0926059	5.01037	1.59041	1.32642	1.90693	5.44e-07	-1	4.3e-06
1yrs	E	A03AA	Synthetic anticholinergics, esters with tertiary amino group	3811	47	388996	4146	0.122054	0.152766	0.798961	1.12982	0.837476	1.5242	0.424	0	0.588
1yrs	E	A03AX	Other drugs for functional gastrointestinal disorders	3839	19	391432	1710	0.00709431	0.2507	0.028298	1.00712	0.616147	1.64618	0.977	0	0.979
1yrs	E	A03BB	Belladonna alkaloids, semisynthetic, quaternary ammonium compounds	3781	77	390072	3070	0.892119	0.122851	7.26181	2.44029	1.9181	3.10465	3.83e-13	-1	6.98e-12
1yrs	E	A03FA	Propulsives [DG:DG01763]	3821	37	391336	1806	0.594075	0.182934	3.24749	1.81136	1.26558	2.59249	0.00116	-1	0.00502
1yrs	E	A04AA	Serotonin (5HT3) antagonists	3850	8	392749	393	0.83004	0.354662	2.34037	2.29341	1.14444	4.59591	0.0193	-1	0.0601
1yrs	E	A05AA	Bile acid and derivatives [DG:DG01956]	3851	7	392636	506	0.111259	0.449695	0.247409	1.11768	0.462953	2.69837	0.805	0	0.867
1yrs	E	A06AA	Softeners, emollients	3753	105	389191	3951	0.813822	0.120999	6.72588	2.25652	1.7801	2.86044	1.75e-11	-1	2.77e-10
1yrs	E	A06AB	Contact laxatives	3665	193	387741	5401	1.10902	0.0915779	12.1101	3.03138	2.53331	3.62737	9.47e-34	-1	1.12e-31
1yrs	E	A06AC	Bulk-forming laxatives	3839	19	390620	2522	-0.200394	0.249529	-0.80309	0.818408	0.501845	1.33466	0.422	0	0.588
1yrs	E	A06AD	Osmotically acting laxatives	3494	364	375078	18064	0.692792	0.0643489	10.7662	1.99929	1.76239	2.26803	5.02e-27	-1	2.97e-25
1yrs	E	A06AG	Enemas	3841	17	392795	347	1.43105	0.283845	5.04168	4.18311	2.39822	7.2964	4.62e-07	-1	3.78e-06
1yrs	E	A06AX	Other drugs for constipation	3844	14	392179	963	0.338024	0.29225	1.15663	1.40217	0.790747	2.48637	0.247	0	0.416
1yrs	E	A07AA	Antibiotics	3804	54	390951	2191	0.738811	0.158943	4.64828	2.09344	1.53309	2.85861	3.35e-06	-1	2.27e-05
1yrs	E	A07DA	Antipropulsives	3787	71	389087	4055	0.505886	0.136148	3.71572	1.65845	1.27003	2.16567	0.000203	-1	0.00104
1yrs	E	A07EC	Aminosalicylic acid and similar agents	3820	38	389491	3651	-0.0485183	0.174206	-0.278511	0.95264	0.677086	1.34034	0.781	0	0.854
1yrs	E	A08AB	Peripherally acting antiobesity products	3848	10	392732	410	0.279722	0.361599	0.77357	1.32276	0.651159	2.68705	0.439	0	0.597
1yrs	E	A09AA	Enzyme preparations	3853	5	392306	836	-0.553233	0.485446	-1.13964	0.575088	0.222086	1.48918	0.254	0	0.419
1yrs	E	A09AB	Acid preparations	3847	11	392980	162	1.57958	0.355854	4.43885	4.85293	2.41602	9.74785	9.05e-06	-1	5.8e-05
1yrs	E	A10AB	Insulins and analogues for injection, fast-acting	3690	168	383004	10138	0.0308489	0.115466	0.267169	1.03133	0.822456	1.29325	0.789	0	0.854
1yrs	E	A10AC	Insulins and analogues for injection, intermediate-acting	3838	20	391989	1153	-0.136357	0.320526	-0.425417	0.872531	0.46553	1.63536	0.67	0	0.775
1yrs	E	A10AD	Insulins and analogues for injection, intermediate- or long-acting combined with fast-acting	3816	42	391353	1789	0.181656	0.225048	0.807189	1.1992	0.771491	1.86403	0.42	0	0.588
1yrs	E	A10AE	Insulins and analogues for injection, long-acting	3821	37	390087	3055	-0.528652	0.230525	-2.29325	0.589399	0.375133	0.926047	0.0218	1	0.0647
1yrs	E	A10BA	Biguanides [DG:DG01684]	3545	313	369828	23314	-0.120113	0.0851808	-1.41009	0.88682	0.750463	1.04795	0.159	0	0.304
1yrs	E	A10BB	Sulfonylureas	3761	97	386387	6755	-0.0363532	0.134308	-0.27067	0.9643	0.74112	1.25469	0.787	0	0.854
1yrs	E	A10BD	Combinations of oral blood glucose lowering drugs	3847	11	392761	381	0.538098	0.352124	1.52815	1.71275	0.858941	3.41525	0.127	0	0.256
1yrs	E	A10BG	Thiazolidinediones [DG:DG01683]	3848	10	392339	803	-0.291185	0.405506	-0.718078	0.747377	0.337576	1.65466	0.473	0	0.616
1yrs	E	A10BH	Dipeptidyl peptidase 4 (DPP-4) inhibitors [DG:DG01601]	3770	88	387096	6046	-0.128866	0.144461	-0.892043	0.879092	0.662321	1.16681	0.372	0	0.552
1yrs	E	A10BJ	Glucagon-like peptide-1 receptor (GLP-1) analogues	3830	28	391309	1833	-0.339445	0.250098	-1.35725	0.712165	0.436211	1.16269	0.175	0	0.331
1yrs	E	A10BK	Sodium-glucose co-transporter 2 (SGLT2) inhibitors	3801	57	389384	3758	-0.123181	0.161491	-0.762774	0.884104	0.644231	1.21329	0.446	0	0.597
1yrs	E	A11CC	Vitamin D and analogues	3714	144	384921	8221	0.317747	0.0982393	3.23442	1.37403	1.13338	1.66578	0.00122	-1	0.0051
1yrs	E	A11DA	Vitamin B1, plain	3817	41	391551	1591	0.465796	0.199935	2.32973	1.59328	1.07673	2.35765	0.0198	-1	0.061
1yrs	E	A11EX	Vitamin B-complex, other combinations	3846	12	392234	908	-0.12446	0.344939	-0.360818	0.882973	0.44909	1.73605	0.718	0	0.814
1yrs	E	A12AA	Calcium	3840	18	392405	737	0.805852	0.271597	2.96709	2.2386	1.3146	3.81207	0.00301	-1	0.0117
1yrs	E	A12AX	Calcium, combinations with vitamin D and/or other drugs	3498	360	358488	34654	0.03251	0.0640044	0.507934	1.03304	0.911251	1.17112	0.612	0	0.731
1yrs	E	A12BA	Potassium	3850	8	392823	319	0.630087	0.444163	1.41859	1.87777	0.786267	4.48453	0.156	0	0.303
1yrs	E	B01AA	Vitamin K antagonists	3785	73	386684	6458	-0.0762328	0.149241	-0.510802	0.9266	0.691604	1.24144	0.61	0	0.731
1yrs	E	B01AB	Heparin group	3843	15	392437	705	0.686769	0.287658	2.38745	1.98728	1.13085	3.49233	0.017	-1	0.0551
1yrs	E	B01AC	Platelet aggregation inhibitors excl. heparin	3362	496	349128	44014	-0.00165777	0.0640924	-0.0258653	0.998344	0.88049	1.13197	0.979	0	0.979
1yrs	E	B01AE	Direct thrombin inhibitors	3850	8	392339	803	0.273088	0.369141	0.739793	1.31402	0.637362	2.70904	0.459	0	0.608
1yrs	E	B01AF	Direct factor Xa inhibitors	3632	226	376098	17044	0.258877	0.0817136	3.1681	1.29547	1.10376	1.52049	0.00153	-1	0.00616
1yrs	E	B02AA	Amino acids	3853	5	392889	253	0.251232	0.44349	0.566488	1.28561	0.539024	3.06626	0.571	0	0.712
1yrs	E	B03AA	Iron bivalent, oral preparations	3706	152	385045	8097	0.338599	0.101644	3.33121	1.40298	1.14956	1.71227	0.000865	-1	0.00399
1yrs	E	B03BA	Vitamin B12 (cyanocobalamin and analogues)	3711	147	384889	8253	0.418318	0.0963606	4.34117	1.5194	1.25791	1.83525	1.42e-05	-1	8.63e-05
1yrs	E	B03BB	Folic acid and derivatives	3690	168	384571	8571	0.442868	0.0951221	4.65579	1.55717	1.29231	1.87631	3.23e-06	-1	2.25e-05
1yrs	E	B05CB	Salt solutions	3833	25	392623	519	1.36882	0.250097	5.47318	3.93072	2.40763	6.41734	4.42e-08	-1	4.36e-07
1yrs	E	B05XA	Electrolyte solutions	3850	8	392688	454	-0.162441	0.514559	-0.315689	0.850066	0.310069	2.33049	0.752	0	0.837
1yrs	E	C01AA	Digitalis glycosides [DG:DG01697]	3821	37	390817	2325	0.262536	0.218142	1.20351	1.30022	0.84788	1.99389	0.229	0	0.396
1yrs	E	C01BC	Antiarrhythmics, class Ic [DG:DG01650]	3850	8	391940	1202	-0.330956	0.37739	-0.876959	0.718237	0.342793	1.50489	0.381	0	0.557
1yrs	E	C01BD	Antiarrhythmics, class III [DG:DG01648]	3845	13	392409	733	0.536958	0.318166	1.68767	1.71079	0.91701	3.1917	0.0915	0	0.21
1yrs	E	C01CA	Adrenergic and dopaminergic agents	3847	11	392126	1016	-0.0121468	0.319887	-0.0379723	0.987927	0.527759	1.84933	0.97	0	0.979
1yrs	E	C01DA	Organic nitrates	3681	177	382471	10671	0.295317	0.104307	2.83121	1.34355	1.09513	1.64832	0.00464	-1	0.0169
1yrs	E	C01DX	Other vasodilators used in cardiac diseases	3840	18	391581	1561	-0.402386	0.33862	-1.18831	0.668723	0.344359	1.29862	0.235	0	0.403
1yrs	E	C01EB	Other cardiac preparations	3831	27	391956	1186	0.440351	0.250324	1.75912	1.55325	0.950965	2.53699	0.0786	0	0.19
1yrs	E	C02AC	Imidazoline receptor agonists	3850	8	392549	593	0.0885774	0.408355	0.216913	1.09262	0.490767	2.43255	0.828	0	0.872
1yrs	E	C02CA	Alpha-adrenoreceptor antagonists	3760	98	384232	8910	-0.0660635	0.120824	-0.546773	0.936071	0.738691	1.18619	0.585	0	0.714
1yrs	E	C03AA	Thiazides, plain [DG:DG01749]	3726	132	377052	16090	-0.167869	0.100398	-1.67204	0.845465	0.694442	1.02933	0.0945	0	0.211
1yrs	E	C03BA	Sulfonamides, plain	3767	91	384490	8652	-0.102656	0.12207	-0.840958	0.902438	0.710413	1.14637	0.4	0	0.573
1yrs	E	C03CA	Sulfonamides, plain	3636	222	381915	11227	0.494251	0.0919059	5.3778	1.63927	1.36905	1.96282	7.55e-08	-1	6.63e-07
1yrs	E	C03DA	Aldosterone antagonists	3804	54	389430	3712	0.151122	0.167882	0.900165	1.16314	0.837007	1.61634	0.368	0	0.552
1yrs	E	C03DB	Other potassium-sparing agents	3853	5	392927	215	0.780098	0.505367	1.54363	2.18169	0.810255	5.87439	0.123	0	0.251
1yrs	E	C03EB	High-ceiling diuretics and potassium-sparing agents	3850	8	392772	370	0.466305	0.470194	0.991729	1.59409	0.634282	4.00631	0.321	0	0.511
1yrs	E	C05AE	Muscle relaxants	3852	6	392705	437	0.164359	0.429641	0.382551	1.17864	0.507771	2.73585	0.702	0	0.804
1yrs	E	C05AX	Other agents for treatment of hemorrhoids and anal fissures for topical use	3805	53	389099	4043	0.0931673	0.152302	0.611729	1.09765	0.814371	1.47946	0.541	0	0.688
1yrs	E	C07AA	Beta blocking agents, non-selective	3809	49	388281	4861	0.0507167	0.140083	0.362048	1.05202	0.799442	1.38441	0.717	0	0.814
1yrs	E	C07AB	Beta blocking agents, selective	3406	452	350509	42633	-0.085407	0.0644817	-1.32452	0.918139	0.809135	1.04183	0.185	0	0.338
1yrs	E	C07AG	Alpha and beta blocking agents	3845	13	392574	568	0.476312	0.356746	1.33516	1.61012	0.800195	3.23984	0.182	0	0.334
1yrs	E	C08CA	Dihydropyridine derivatives [DG:DG01928]	3225	633	327494	65648	-0.0873801	0.0503876	-1.73416	0.916329	0.830159	1.01144	0.0829	0	0.196
1yrs	E	C08DA	Phenylalkylamine derivatives	3849	9	392285	857	0.140651	0.353614	0.397753	1.15102	0.575554	2.30187	0.691	0	0.795
1yrs	E	C08DB	Benzothiazepine derivatives	3827	31	389438	3704	-0.361066	0.219359	-1.64601	0.696933	0.45339	1.0713	0.0998	0	0.219
1yrs	E	C09AA	ACE inhibitors, plain [DG:DG01501]	3270	588	331703	61439	-0.230727	0.0531087	-4.34444	0.793956	0.715468	0.881054	1.4e-05	1	8.63e-05
1yrs	E	C09CA	Angiotensin II receptor blockers, plain [DG:DG01495]	3533	325	358901	34241	-0.142405	0.0671113	-2.12192	0.86727	0.760377	0.98919	0.0338	1	0.0944
1yrs	E	C09DX	Angiotensin II receptor blockers (ARBs), other combinations	3850	8	392750	392	0.351751	0.459422	0.765639	1.42155	0.5777	3.49804	0.444	0	0.597
1yrs	E	C10AA	HMG CoA reductase inhibitors [DG:DG01660]	2600	1258	255620	137522	-0.180994	0.0420699	-4.30223	0.83444	0.768396	0.906161	1.69e-05	1	0.0001
1yrs	E	C10AB	Fibrates	3842	16	391471	1671	-0.503204	0.325064	-1.54802	0.604591	0.319717	1.14329	0.122	0	0.251
1yrs	E	C10AC	Bile acid sequestrants	3845	13	392386	756	0.479039	0.292538	1.63753	1.61452	0.909986	2.86453	0.102	0	0.221
1yrs	E	C10AX	Other lipid modifying agents	3813	45	388838	4304	-0.059323	0.171675	-0.345554	0.942402	0.673141	1.31937	0.73	0	0.824
1yrs	E	D01AC	Imidazole and triazole derivatives	3640	218	380909	12233	0.480959	0.0764264	6.29309	1.61762	1.39259	1.87902	3.12e-10	-1	4.11e-09
1yrs	E	D01AE	Other antifungals for topical use	3818	40	390817	2325	0.442845	0.173275	2.55573	1.55713	1.10875	2.18684	0.0106	-1	0.0359
1yrs	E	D01AX		3779	79	388248	4894	0.359799	0.126902	2.83525	1.43304	1.11748	1.83771	0.00458	-1	0.0169
1yrs	E	D01BA	Antifungals for systemic use	3827	31	391754	1388	0.860385	0.172459	4.98894	2.36407	1.68602	3.3148	6.07e-07	-1	4.5e-06
1yrs	E	D02AC	Soft paraffin and fat products	3790	68	386841	6301	0.0271561	0.137855	0.196991	1.02753	0.784244	1.34628	0.844	0	0.885
1yrs	E	D02AE	Carbamide products	3832	26	391360	1782	0.363335	0.214705	1.69225	1.43812	0.94414	2.19055	0.0906	0	0.21
1yrs	E	D02AX	Other emollients and protectives	3503	355	371138	22004	0.37513	0.0639625	5.86485	1.45518	1.28372	1.64954	4.5e-09	-1	5.08e-08
1yrs	E	D05AX	Other antipsoriatics for topical use	3816	42	389483	3659	0.0924971	0.166242	0.556401	1.09691	0.791891	1.51942	0.578	0	0.713
1yrs	E	D06AX	Other antibiotics for topical use	3804	54	390094	3048	0.541456	0.143312	3.77816	1.71851	1.29767	2.27583	0.000158	-1	0.000871
1yrs	E	D06BA	Sulfonamides	3851	7	393046	96	1.8161	0.438976	4.13712	6.14781	2.60053	14.5338	3.52e-05	-1	0.000203
1yrs	E	D06BB	Antivirals	3847	11	392392	750	0.409536	0.318083	1.28751	1.50612	0.807431	2.80939	0.198	0	0.353
1yrs	E	D06BX	Other chemotherapeutics	3837	21	391376	1766	0.218104	0.218268	0.99925	1.24372	0.810832	1.90771	0.318	0	0.509
1yrs	E	D07AA	Corticosteroids, weak (group I)	3793	65	388016	5126	0.266223	0.130614	2.03825	1.30503	1.01028	1.68577	0.0415	-1	0.112
1yrs	E	D07AB	Corticosteroids, moderately potent (group II)	3800	58	388587	4555	0.188859	0.143186	1.31898	1.20787	0.912305	1.59919	0.187	0	0.339
1yrs	E	D07AC	Corticosteroids, potent (group III)	3694	164	379641	13501	0.197689	0.0840097	2.35317	1.21858	1.03358	1.4367	0.0186	-1	0.0588
1yrs	E	D07AD	Corticosteroids, very potent (group IV)	3799	59	388579	4563	0.366435	0.132609	2.76327	1.44258	1.11241	1.87076	0.00572	-1	0.0202
1yrs	E	D07BC	Corticosteroids, potent, combinations with antiseptics	3852	6	392459	683	-0.348237	0.456367	-0.763063	0.705931	0.288603	1.72673	0.445	0	0.597
1yrs	E	D07CA	Corticosteroids, weak, combinations with antibiotics	3834	24	391362	1780	0.340121	0.209784	1.62129	1.40512	0.931416	2.11973	0.105	0	0.226
1yrs	E	D07CC	Corticosteroids, potent, combinations with antibiotics	3789	69	389723	3419	0.53094	0.138685	3.82839	1.70053	1.29579	2.23169	0.000129	-1	0.000728
1yrs	E	D07CD	Corticosteroids, very potent, combinations with antibiotics	3840	18	392226	916	0.497803	0.268686	1.85273	1.6451	0.971598	2.78548	0.0639	0	0.159
1yrs	E	D09AA	Medicated dressings with antiinfectives	3833	25	392555	587	1.33648	0.244977	5.45555	3.80564	2.35452	6.15111	4.89e-08	-1	4.48e-07
1yrs	E	D10AF	Antiinfectives for treatment of acne	3853	5	392745	397	0.098302	0.437605	0.224636	1.1033	0.467951	2.60126	0.822	0	0.871
1yrs	E	D11AC	Medicated shampoos	3832	26	391693	1449	0.222978	0.241941	0.921624	1.24979	0.777853	2.00807	0.357	0	0.55
1yrs	E	D11AH	Agents for dermatitis, excluding corticosteroids	3852	6	392559	583	0.220815	0.361902	0.610152	1.24709	0.613545	2.53484	0.542	0	0.688
1yrs	E	D11AX	Other dermatologicals	3851	7	392650	492	0.0949129	0.424317	0.223684	1.09956	0.478674	2.52581	0.823	0	0.871
1yrs	E	G01AF	Imidazole derivatives	3810	48	390877	2265	0.450362	0.16981	2.65214	1.56888	1.12472	2.18843	0.008	-1	0.0279
1yrs	E	G03AC	Progestogens	3850	8	392259	883	-0.504419	0.313239	-1.61033	0.603856	0.326816	1.11574	0.107	0	0.228
1yrs	E	G03BA	3-oxoandrosten (4) derivatives	3839	19	391967	1175	0.183385	0.249866	0.733933	1.20128	0.736133	1.96033	0.463	0	0.61
1yrs	E	G03CA	Natural and semisynthetic estrogens, plain	3679	179	371957	21185	-0.0726671	0.073758	-0.985211	0.92991	0.804744	1.07454	0.325	0	0.513
1yrs	E	G03CX	Other estrogens	3852	6	392620	522	0.310617	0.359058	0.865088	1.36427	0.674944	2.75759	0.387	0	0.563
1yrs	E	G03DA	Pregnen (4) derivatives	3845	13	392001	1141	0.00966801	0.240074	0.0402709	1.00971	0.630734	1.61641	0.968	0	0.979
1yrs	E	G03FA	Progestogens and estrogens, fixed combinations	3842	16	392132	1010	0.396565	0.217326	1.82475	1.48671	0.971041	2.27622	0.068	0	0.168
1yrs	E	G03FB	Progestogens and estrogens, sequential preparations	3830	28	391500	1642	0.379745	0.169823	2.23612	1.46191	1.04801	2.03927	0.0253	-1	0.0741
1yrs	E	G04BD	Urinary antispasmodics	3729	129	382123	11019	0.143212	0.0982648	1.45741	1.15397	0.951815	1.39907	0.145	0	0.288
1yrs	E	G04BE	Drugs used in erectile dysfunction	3709	149	380209	12933	0.0799755	0.0883646	0.905062	1.08326	0.910996	1.2881	0.365	0	0.552
1yrs	E	G04CA	Alpha-adrenoreceptor antagonists	3841	17	391718	1424	0.338007	0.252351	1.33943	1.40215	0.855051	2.29931	0.18	0	0.334
1yrs	E	G04CB	Testosterone-5-alpha reductase inhibitors	3778	80	384405	8737	-0.100852	0.134368	-0.750568	0.904067	0.694746	1.17645	0.453	0	0.603
1yrs	E	H01BA	Vasopressin and analogues [DG:DG01952]	3853	5	392924	218	0.359431	0.589201	0.610031	1.43251	0.451407	4.546	0.542	0	0.688
1yrs	E	H02AA	Mineralocorticoids	3845	13	392620	522	0.600892	0.357366	1.68145	1.82374	0.905258	3.67414	0.0927	0	0.211
1yrs	E	H02AB	Glucocorticoids	3536	322	372897	20245	0.424107	0.0670248	6.32761	1.52823	1.3401	1.74277	2.49e-10	-1	3.47e-09
1yrs	E	H02BX	Corticosteroids for systemic use, combinations	3832	26	391287	1855	0.35113	0.204693	1.7154	1.42067	0.95117	2.12192	0.0863	0	0.202
1yrs	E	H03AA	Thyroid hormones	3587	271	359009	34133	-0.217739	0.0658626	-3.30596	0.804335	0.706927	0.915166	0.000947	1	0.00423
1yrs	E	J01AA	Tetracyclines [DG:DG01197]	3550	308	376970	16172	0.619056	0.0652512	9.48727	1.85717	1.63422	2.11055	2.38e-21	-1	6.27e-20
1yrs	E	J01CA	Penicillins with extended spectrum [DG:DG01780]	3332	526	366276	26866	0.672873	0.0509662	13.2023	1.95986	1.77355	2.16575	8.67e-40	-1	2.05e-37
1yrs	E	J01CE	Beta-lactamase sensitive penicillins [DG:DG01778]	3823	35	390434	2708	0.194611	0.169108	1.15081	1.21484	0.872113	1.69225	0.25	0	0.416
1yrs	E	J01CF	Beta-lactamase resistant penicillins [DG:DG01779]	3589	269	380509	12633	0.672526	0.0690514	9.73951	1.95918	1.71119	2.24311	2.06e-22	-1	6.1e-21
1yrs	E	J01CR	Combinations of penicillins, incl. beta-lactamase inhibitors	3745	113	388192	4950	0.65555	0.110222	5.94756	1.9262	1.55196	2.39069	2.72e-09	-1	3.39e-08
1yrs	E	J01DB	First-generation cephalosporins [DG:DG01774]	3814	44	390749	2393	0.439628	0.185319	2.37227	1.55213	1.0794	2.23189	0.0177	-1	0.0566
1yrs	E	J01EA	Trimethoprim and derivatives [DG:DG01581]	3782	76	388287	4855	0.419605	0.128502	3.26535	1.52136	1.18263	1.9571	0.00109	-1	0.0048
1yrs	E	J01EE	Combinations of sulfonamides and trimethoprim, incl. derivatives	3845	13	392714	428	0.925052	0.325656	2.84058	2.522	1.33213	4.77469	0.0045	-1	0.0169
1yrs	E	J01FA	Macrolides [DG:DG01551]	3691	167	384061	9081	0.492592	0.0876042	5.62292	1.63655	1.37835	1.94312	1.88e-08	-1	1.94e-07
1yrs	E	J01FF	Lincosamides [DG:DG01578]	3843	15	392803	339	0.935271	0.359116	2.60437	2.5479	1.26038	5.15068	0.0092	-1	0.0316
1yrs	E	J01MA	Fluoroquinolones [DG:DG01549]	3821	37	390677	2465	0.262787	0.186619	1.40815	1.30055	0.902144	1.8749	0.159	0	0.304
1yrs	E	J01XE	Nitrofuran derivatives	3541	317	374700	18442	0.622647	0.062459	9.96889	1.86386	1.6491	2.10658	2.1e-23	-1	7.11e-22
1yrs	E	J01XX	Other antibacterials	3851	7	392416	726	-0.39984	0.51558	-0.775515	0.670427	0.244055	1.84169	0.438	0	0.597
1yrs	E	J02AC	Triazole derivatives	3815	43	391058	2084	0.60688	0.164412	3.69122	1.8347	1.32928	2.53229	0.000223	-1	0.00113
1yrs	E	J05AB	Nucleosides and nucleotides excl. reverse transcriptase inhibitors [DG:DG02840]	3808	50	389680	3462	0.288438	0.146223	1.97259	1.33434	1.00185	1.77718	0.0485	-1	0.128
1yrs	E	J07AL	Pneumococcal vaccines	3840	18	391126	2016	-0.101881	0.237626	-0.428744	0.903137	0.566873	1.43887	0.668	0	0.775
1yrs	E	J07AP	Typhoid vaccines	3846	12	391750	1392	0.069843	0.252687	0.276401	1.07234	0.653498	1.75963	0.782	0	0.854
1yrs	E	J07BB	Influenza vaccines	3554	304	346811	46331	-0.312048	0.0624907	-4.99352	0.731946	0.64757	0.827316	5.93e-07	1	4.5e-06
1yrs	E	J07BC	Hepatitis vaccines	3852	6	392209	933	-0.163156	0.335969	-0.48563	0.849458	0.439708	1.64104	0.627	0	0.743
1yrs	E	J07CA	Bacterial and viral vaccines, combined	3831	27	390013	3129	-0.177374	0.190978	-0.928766	0.837467	0.575979	1.21767	0.353	0	0.55
1yrs	E	L01BC	Pyrimidine analogues	3845	13	390735	2407	-0.245785	0.266896	-0.920903	0.78209	0.463526	1.31959	0.357	0	0.55
1yrs	E	L02AE	Gonadotropin releasing hormone analogues	3838	20	391341	1801	0.016272	0.281143	0.0578779	1.01641	0.58581	1.76351	0.954	0	0.974
1yrs	E	L02BA	Anti-estrogens	3849	9	392078	1064	-0.178466	0.319116	-0.559253	0.836552	0.44757	1.5636	0.576	0	0.713
1yrs	E	L02BB	Anti-androgens	3851	7	392636	506	0.480263	0.410637	1.16956	1.6165	0.722837	3.61502	0.242	0	0.41
1yrs	E	L02BG	Aromatase inhibitors [DG:DG01596]	3819	39	389273	3869	0.252181	0.156865	1.60763	1.28683	0.94623	1.75003	0.108	0	0.228
1yrs	E	L04AA	Selective immunosuppressants	3847	11	392453	689	0.292671	0.330536	0.885443	1.34	0.701054	2.56129	0.376	0	0.553
1yrs	E	L04AD	Calcineurin inhibitors	3853	5	392935	207	0.386211	0.537914	0.717979	1.4714	0.51269	4.22283	0.473	0	0.616
1yrs	E	L04AX	Other immunosuppressants	3813	45	388814	4328	0.0497342	0.156149	0.318505	1.05099	0.7739	1.4273	0.75	0	0.837
1yrs	E	M01AB	Acetic acid derivatives and related substances	3833	25	391485	1657	0.302539	0.20787	1.45543	1.35329	0.900433	2.03391	0.146	0	0.288
1yrs	E	M01AC	Oxicams	3853	5	392255	887	-0.398475	0.427681	-0.931712	0.671343	0.290336	1.55234	0.351	0	0.55
1yrs	E	M01AE	Propionic acid derivatives	3600	258	372778	20364	0.237605	0.0631973	3.75973	1.26821	1.12046	1.43544	0.00017	-1	0.000916
1yrs	E	M01AH	Coxibs	3840	18	391829	1313	0.155511	0.255746	0.608066	1.16825	0.707694	1.92854	0.543	0	0.688
1yrs	E	M02AA	Antiinflammatory preparations, non-steroids for topical use	3539	319	373860	19282	0.544977	0.0656164	8.30549	1.72457	1.51645	1.96125	9.97e-17	-1	2.15e-15
1yrs	E	M03BA	Carbamic acid esters	3851	7	392985	157	0.698638	0.541451	1.29031	2.01101	0.695871	5.81166	0.197	0	0.353
1yrs	E	M03BX	Other centrally acting agents	3838	20	392115	1027	0.591326	0.232072	2.54803	1.80638	1.14622	2.84676	0.0108	-1	0.0362
1yrs	E	M04AA	Preparations inhibiting uric acid production	3727	131	382946	10196	-0.0485041	0.106626	-0.454901	0.952653	0.772992	1.17407	0.649	0	0.758
1yrs	E	M04AC	Preparations with no effect on uric acid metabolism	3815	43	390923	2219	0.390035	0.182509	2.13708	1.47703	1.03285	2.11224	0.0326	-1	0.0942
1yrs	E	M05BA	Bisphosphonates [DG:DG01600]	3719	139	379446	13696	0.192026	0.0946696	2.02839	1.2117	1.0065	1.45874	0.0425	-1	0.113
1yrs	E	M05BX	Other drugs affecting bone structure and mineralization	3850	8	392301	841	0.0952047	0.410422	0.231968	1.09988	0.492032	2.45867	0.817	0	0.871
1yrs	E	N01BB	Amides	3798	60	389255	3887	0.438874	0.138218	3.17522	1.55096	1.1829	2.03354	0.0015	-1	0.00612
1yrs	E	N01BX	Other local anesthetics	3848	10	392299	843	-0.0518093	0.369694	-0.140141	0.94951	0.46006	1.95968	0.888	0	0.927
1yrs	E	N02AA	Natural opium alkaloids	3717	141	387416	5726	0.72672	0.101493	7.16032	2.06829	1.69519	2.52349	8.06e-13	-1	1.36e-11
1yrs	E	N02AB	Phenylpiperidine derivatives	3842	16	392557	585	0.663165	0.3121	2.12485	1.94093	1.0528	3.57825	0.0336	-1	0.0944
1yrs	E	N02AE	Oripavine derivatives	3810	48	391173	1969	0.482927	0.193848	2.49127	1.62081	1.10848	2.36994	0.0127	-1	0.0419
1yrs	E	N02AJ	Opioids in combination with non-opioid analgesics	3501	357	369619	23523	0.388397	0.0603471	6.43605	1.47462	1.31012	1.65976	1.23e-10	-1	1.82e-09
1yrs	E	N02AX	Other opioids	3753	105	386054	7088	0.0607259	0.118138	0.514024	1.06261	0.842972	1.33947	0.607	0	0.731
1yrs	E	N02BA	Salicylic acid and derivatives	3852	6	392835	307	0.792069	0.410412	1.92994	2.20796	0.98775	4.93555	0.0536	0	0.137
1yrs	E	N02BE	Anilides	3041	817	343710	49432	0.525324	0.0466226	11.2676	1.69101	1.54333	1.85281	1.92e-29	-1	1.52e-27
1yrs	E	N02BG	Other analgesics and antipyretics	3843	15	392568	574	0.852719	0.284972	2.99229	2.34602	1.34203	4.1011	0.00277	-1	0.0109
1yrs	E	N02CC	Selective serotonin (5HT1) agonists [DG:DG01943]	3806	52	388010	5132	0.0396797	0.130917	0.303091	1.04048	0.805	1.34484	0.762	0	0.844
1yrs	E	N02CX	Other antimigraine preparations	3850	8	392086	1056	-0.635971	0.400035	-1.58979	0.529421	0.241707	1.15961	0.112	0	0.235
1yrs	E	N03AB	Hydantoin derivatives	3848	10	392648	494	0.463537	0.37471	1.23705	1.58969	0.762705	3.31334	0.216	0	0.379
1yrs	E	N03AE	Benzodiazepine derivatives	3843	15	392419	723	0.438861	0.307084	1.42913	1.55094	0.84958	2.8313	0.153	0	0.3
1yrs	E	N03AF	Carboxamide derivatives	3840	18	391462	1680	-0.250311	0.277444	-0.902203	0.778558	0.45199	1.34108	0.367	0	0.552
1yrs	E	N03AG	Fatty acid derivatives	3835	23	391816	1326	0.117402	0.243894	0.481365	1.12457	0.697242	1.8138	0.63	0	0.743
1yrs	E	N03AX	Other antiepileptics	3593	265	376275	16867	0.156289	0.0759336	2.05823	1.16916	1.00749	1.35678	0.0396	-1	0.108
1yrs	E	N04BA	Dopa and dopa derivatives	3818	40	390648	2494	0.515181	0.180578	2.85296	1.67394	1.17498	2.38478	0.00433	-1	0.0166
1yrs	E	N04BB	Adamantane derivatives	3853	5	392894	248	0.323638	0.566529	0.571265	1.38215	0.455326	4.19553	0.568	0	0.712
1yrs	E	N04BC	Dopamine agonists	3830	28	391402	1740	0.421193	0.214993	1.9591	1.52378	0.999813	2.32234	0.0501	0	0.13
1yrs	E	N04BD	Monoamine oxidase B inhibitors	3850	8	392557	585	0.422823	0.375799	1.12513	1.52626	0.730715	3.18795	0.261	0	0.426
1yrs	E	N05AB	Phenothiazines with piperazine structure	3793	65	388165	4977	0.279632	0.131265	2.13029	1.32264	1.02261	1.71071	0.0331	-1	0.0944
1yrs	E	N05AD	Butyrophenone derivatives [DG:DG01940]	3848	10	392921	221	1.2624	0.378831	3.33237	3.53391	1.68187	7.42536	0.000861	-1	0.00399
1yrs	E	N05AH	Diazepines, oxazepines and thiazepines	3829	29	391546	1596	0.180051	0.214377	0.839878	1.19728	0.786532	1.82253	0.401	0	0.573
1yrs	E	N05AN	Lithium	3852	6	392548	594	-0.339752	0.481271	-0.705947	0.711947	0.277196	1.82855	0.48	0	0.622
1yrs	E	N05AX	Other antipsychotics	3819	39	392299	843	1.06171	0.194652	5.45439	2.89131	1.97427	4.23431	4.92e-08	-1	4.48e-07
1yrs	E	N05BA	Benzodiazepine derivatives [DG:DG01914]	3720	138	387526	5616	0.809985	0.0939013	8.62592	2.24787	1.87	2.7021	6.38e-18	-1	1.51e-16
1yrs	E	N05BB	Diphenylmethane derivatives	3848	10	392533	609	0.321776	0.351296	0.915968	1.37958	0.69298	2.74644	0.36	0	0.55
1yrs	E	N05CD	Benzodiazepine derivatives	3801	57	391787	1355	1.54929	0.150211	10.3141	4.70813	3.50743	6.31988	6.13e-25	-1	2.42e-23
1yrs	E	N05CF	Benzodiazepine related drugs	3762	96	386905	6237	0.385034	0.111464	3.45434	1.46966	1.18124	1.82851	0.000552	-1	0.00272
1yrs	E	N05CH	Melatonin receptor agonists	3848	10	392576	566	0.210825	0.388216	0.54306	1.2347	0.576911	2.64248	0.587	0	0.714
1yrs	E	N06AA	Non-selective monoamine reuptake inhibitors [DG:DG01730]	3602	256	371462	21680	0.0715579	0.0708791	1.00958	1.07418	0.934856	1.23427	0.313	0	0.504
1yrs	E	N06AB	Selective serotonin reuptake inhibitors	3472	386	363943	29199	0.0523888	0.0614353	0.852747	1.05379	0.934239	1.18863	0.394	0	0.569
1yrs	E	N06AX	Other antidepressants	3664	194	381788	11354	0.318477	0.0853301	3.73229	1.37503	1.16327	1.62535	0.00019	-1	0.001
1yrs	E	N06DA	Anticholinesterases	3789	69	391006	2136	1.14687	0.156353	7.33517	3.14834	2.31736	4.2773	2.22e-13	-1	4.38e-12
1yrs	E	N06DX	Other anti-dementia drugs	3792	66	392134	1008	1.81132	0.169377	10.694	6.11849	4.39006	8.52744	1.1e-26	-1	5.21e-25
1yrs	E	N07BA	Drugs used in nicotine dependence	3850	8	392563	579	0.0521453	0.382241	0.13642	1.05353	0.49806	2.22849	0.891	0	0.927
1yrs	E	N07BC	Drugs used in opioid dependence	3852	6	393025	117	1.48402	0.445934	3.32789	4.41064	1.84043	10.5702	0.000875	-1	0.00399
1yrs	E	N07CA	Antivertigo preparations	3802	56	389008	4134	0.245887	0.149278	1.64718	1.27876	0.95438	1.71338	0.0995	0	0.219
1yrs	E	P01AB	Nitroimidazole derivatives	3816	42	391444	1698	0.927978	0.156353	5.93515	2.52939	1.86178	3.4364	2.94e-09	-1	3.48e-08
1yrs	E	P01BA	Aminoquinolines	3837	21	391238	1904	-0.0163417	0.239356	-0.0682738	0.983791	0.615407	1.57269	0.946	0	0.97
1yrs	E	P01BC	Methanolquinolines	3801	57	388653	4489	0.0444371	0.1657	0.268178	1.04544	0.755534	1.44658	0.789	0	0.854
1yrs	E	P03AC	Pyrethrines, incl. synthetic compounds	3851	7	392826	316	0.380595	0.467859	0.813481	1.46315	0.584852	3.66045	0.416	0	0.587
1yrs	E	R01AC	Antiallergic agents, excl. corticosteroids	3849	9	392540	602	0.297617	0.362759	0.820426	1.34665	0.661411	2.7418	0.412	0	0.585
1yrs	E	R01AD	Corticosteroids	3583	275	367822	25320	0.101444	0.0653088	1.55329	1.10677	0.97379	1.2579	0.12	0	0.25
1yrs	E	R01AX	Other nasal preparations	3849	9	392641	501	0.746811	0.325347	2.29543	2.11026	1.11532	3.99275	0.0217	-1	0.0647
1yrs	E	R02AX	Other throat preparetions	3851	7	392807	335	0.835174	0.403678	2.06891	2.30521	1.04496	5.08538	0.0386	-1	0.106
1yrs	E	R03AC	Selective beta-2-adrenoreceptor agonists	3358	500	354667	38475	0.116457	0.0622354	1.87124	1.12351	0.994493	1.26926	0.0613	0	0.155
1yrs	E	R03AK	Adrenergics in combination with corticosteroids or other drugs, excl. anticholinergics	3601	257	372482	20660	0.0190965	0.0810314	0.235668	1.01928	0.869599	1.19472	0.814	0	0.871
1yrs	E	R03AL	Adrenergics in combination with anticholinergics incl. triple combinations with corticosteroids	3815	43	390049	3093	0.115221	0.195463	0.589476	1.12212	0.764999	1.64596	0.555	0	0.7
1yrs	E	R03BA	Glucocorticoids	3696	162	378273	14869	0.0295141	0.0873884	0.337735	1.02995	0.867826	1.22237	0.736	0	0.826
1yrs	E	R03BB	Anticholinergics	3772	86	386934	6208	-0.0149903	0.148087	-0.101227	0.985121	0.73695	1.31687	0.919	0	0.947
1yrs	E	R03DA	Xanthines	3848	10	392614	528	0.222542	0.406591	0.547337	1.24925	0.563063	2.77167	0.584	0	0.714
1yrs	E	R03DC	Leukotriene receptor antagonists	3821	37	389572	3570	-0.255751	0.189509	-1.34954	0.774335	0.534094	1.12264	0.177	0	0.333
1yrs	E	R05CB	Mucolytics	3801	57	389370	3772	0.196621	0.171326	1.14764	1.21728	0.870078	1.70304	0.251	0	0.416
1yrs	E	R05DA	Opium alkaloids and derivatives	3668	190	381378	11764	0.387578	0.0825681	4.69404	1.47341	1.25326	1.73223	2.68e-06	-1	1.92e-05
1yrs	E	R06AB	Substituted alkylamines	3839	19	392038	1104	0.440569	0.253454	1.73826	1.55359	0.945357	2.55316	0.0822	0	0.196
1yrs	E	R06AD	Phenothiazine derivatives	3836	22	391969	1173	0.303042	0.245013	1.23684	1.35397	0.837633	2.1886	0.216	0	0.379
1yrs	E	R06AE	Piperazine derivatives	3688	170	383627	9515	0.510943	0.0877677	5.82154	1.66686	1.40343	1.97974	5.84e-09	-1	6.29e-08
1yrs	E	R06AX	Other antihistamines for systemic use	3727	131	381954	11188	0.0988562	0.0935003	1.05728	1.10391	0.919062	1.32593	0.29	0	0.471
1yrs	E	S01AA	Antibiotics	3788	70	388835	4307	0.375918	0.135551	2.77326	1.45633	1.11655	1.89951	0.00555	-1	0.0199
1yrs	E	S01AE	Fluoroquinolones	3853	5	392790	352	0.245841	0.486825	0.504987	1.2787	0.49247	3.32013	0.614	0	0.731
1yrs	E	S01BA	Corticosteroids, plain	3842	16	391295	1847	-0.0322491	0.260418	-0.123836	0.968265	0.5812	1.61311	0.901	0	0.933
1yrs	E	S01CA	Corticosteroids and antiinfectives in combination	3851	7	392739	403	0.629594	0.422849	1.48893	1.87685	0.819405	4.29893	0.137	0	0.274
1yrs	E	S01EC	Carbonic anhydrase inhibitors	3835	23	389719	3423	-0.309817	0.230578	-1.34365	0.733581	0.466852	1.1527	0.179	0	0.334
1yrs	E	S01ED	Beta blocking agents	3824	34	388022	5120	-0.339823	0.190919	-1.77993	0.711896	0.489672	1.03497	0.0751	0	0.183
1yrs	E	S01EE	Prostaglandin analogues	3789	69	384759	8383	-0.0614763	0.129739	-0.473844	0.940375	0.729233	1.21265	0.636	0	0.746
1yrs	E	S01GX	Other antiallergics	3829	29	390640	2502	0.00634278	0.202627	0.0313028	1.00636	0.676516	1.49703	0.975	0	0.979
1yrs	E	S01XA	Other ophthalmologicals	3669	189	371393	21749	-0.0732566	0.0818384	-0.895136	0.929362	0.791633	1.09105	0.371	0	0.552
1yrs	E	S02AA	Antiinfectives	3840	18	391880	1262	0.3001	0.254829	1.17765	1.34999	0.819257	2.22456	0.239	0	0.407
1yrs	E	S02CA	Corticosteroids and antiinfectives in combination	3837	21	392018	1124	0.462232	0.23623	1.9567	1.58761	0.999228	2.52246	0.0504	0	0.13
1yrs	E	S03BA	Corticosteroids	3850	8	392050	1092	-0.27993	0.360707	-0.776058	0.755837	0.372728	1.53272	0.438	0	0.597
1yrs	E	V03AE	Drugs for treatment of hyperkalemia and hyperphosphatemia	3846	12	393007	135	1.55406	0.452973	3.43079	4.73062	1.94691	11.4945	0.000602	-1	0.00291
1yrs	E	V06DC	Carbohydrates	3843	15	392811	331	0.680367	0.406679	1.67298	1.9746	0.889842	4.38174	0.0943	0	0.211
1yrs	E	V07AY	Other non-therapeutic auxiliary products	3682	176	381878	11264	0.115678	0.095838	1.20701	1.12263	0.93038	1.35461	0.227	0	0.396
1yrs	F	A01AB	Antiinfectives and antiseptics for local oral treatment	3732	126	26111	866	0.14049	0.101568	1.38321	1.15084	0.943096	1.40434	0.167	0	0.444
1yrs	F	A01AD	Other agents for local oral treatment	3826	32	26749	228	0.00477268	0.209581	0.0227725	1.00478	0.666301	1.51522	0.982	0	0.997
1yrs	F	A02BA	H2-receptor antagonists [DG:DG01481]	3761	97	25933	1044	-0.303443	0.120946	-2.50892	0.738272	0.582456	0.935771	0.0121	1	0.0821
1yrs	F	A02BC	Proton pump inhibitors [DG:DG01646]	2610	1248	15851	11126	-0.26503	0.0395101	-6.70791	0.767183	0.710013	0.828955	2.01e-11	1	2.38e-09
1yrs	F	A02BX	Other drugs for peptic ulcer and gastro-oesophageal reflux disease (GORD)	3715	143	25792	1185	0.0375862	0.0987493	0.380623	1.0383	0.855588	1.26003	0.704	0	0.882
1yrs	F	A03AA	Synthetic anticholinergics, esters with tertiary amino group	3811	47	26510	467	-0.274495	0.16179	-1.69662	0.759955	0.553435	1.04354	0.0898	0	0.296
1yrs	F	A03AX	Other drugs for functional gastrointestinal disorders	3839	19	26743	234	-0.506989	0.261886	-1.93591	0.602306	0.360488	1.00634	0.0529	0	0.218
1yrs	F	A03BB	Belladonna alkaloids, semisynthetic, quaternary ammonium compounds	3781	77	26410	567	0.0673055	0.131671	0.511163	1.06962	0.826318	1.38457	0.609	0	0.839
1yrs	F	A03FA	Propulsives [DG:DG01763]	3821	37	26543	434	-0.490001	0.190487	-2.57236	0.612626	0.421741	0.889906	0.0101	1	0.0783
1yrs	F	A04AA	Serotonin (5HT3) antagonists	3850	8	26845	132	-0.568676	0.365359	-1.55649	0.566275	0.276707	1.15887	0.12	0	0.368
1yrs	F	A05AA	Bile acid and derivatives [DG:DG01956]	3851	7	26914	63	-0.366357	0.47429	-0.772432	0.693255	0.273628	1.75641	0.44	0	0.74
1yrs	F	A06AA	Softeners, emollients	3753	105	26198	779	0.0122402	0.128141	0.0955217	1.01232	0.787477	1.30135	0.924	0	0.991
1yrs	F	A06AB	Contact laxatives	3665	193	25854	1123	0.300211	0.0976098	3.07563	1.35014	1.11504	1.63482	0.0021	-1	0.0262
1yrs	F	A06AC	Bulk-forming laxatives	3839	19	26702	275	-0.557851	0.25976	-2.14756	0.572438	0.344042	0.952457	0.0318	1	0.16
1yrs	F	A06AD	Osmotically acting laxatives	3494	364	23975	3002	-0.0529779	0.0679459	-0.779707	0.948401	0.830145	1.0835	0.436	0	0.74
1yrs	F	A06AG	Enemas	3841	17	26885	92	0.37969	0.30489	1.24533	1.46183	0.8042	2.65724	0.213	0	0.485
1yrs	F	A06AX	Other drugs for constipation	3844	14	26777	200	-0.569056	0.304446	-1.86915	0.566059	0.311679	1.02806	0.0616	0	0.236
1yrs	F	A07AA	Antibiotics	3804	54	26568	409	-0.0677355	0.169292	-0.400112	0.934508	0.670619	1.30224	0.689	0	0.882
1yrs	F	A07DA	Antipropulsives	3787	71	26312	665	-0.125962	0.143554	-0.877453	0.881649	0.665422	1.16814	0.38	0	0.688
1yrs	F	A07EC	Aminosalicylic acid and similar agents	3820	38	26606	371	-0.291308	0.184481	-1.57907	0.747286	0.520535	1.07281	0.114	0	0.361
1yrs	F	A08AB	Peripherally acting antiobesity products	3848	10	26918	59	-0.251271	0.396293	-0.634054	0.777811	0.357714	1.69127	0.526	0	0.794
1yrs	F	A09AA	Enzyme preparations	3853	5	26808	169	-1.40972	0.492226	-2.86397	0.244212	0.0930608	0.640865	0.00419	1	0.0397
1yrs	F	A09AB	Acid preparations	3847	11	26952	25	1.04104	0.415029	2.50835	2.83215	1.25554	6.38856	0.0121	-1	0.0821
[truncated: 3,752 more rows]
