# Supplementary material for: Exploring Drugs and Vaccines Associated with Altered Risks and Severity of COVID-19: A UK Biobank Cohort Study of All ATC Level-4 Drug Categories Reveals Repositioning Opportunities
Source: Pharmaceutics. 2021 Sep 18;13(9):1514. doi: 10.3390/pharmaceutics13091514 (PMC8471264; doi:10.3390/pharmaceutics13091514)
Supplement: Supplementary file 1 [file pharmaceutics-13-01514-s001.zip › TableS7-CompleteCovar-GP-available-IPW-rm_vaccine-p6m-rm-epv (1).xlsx]

## Sheet: TableS11-CompleteCovar-GP-avail
Windows	Model	drug	case_notx	case_tx	ctrl_notx	ctrl_tx	estimate	OR	lower_CI_OR	upper_CI_OR	p	sig	Full name	p.adj
p6m	A	A01AB	1146	25	2277	30	0.3117	1.3657	0.770179	2.42198	0.29	0	A01AB Antiinfectives and antiseptics for local oral treatment	0.461
p6m	A	A01AD	1160	11	2302	5	1.0093	2.7436	0.895379	8.4069	0.077	0	A01AD Other agents for local oral treatment	0.229
p6m	A	A02BA	1142	29	2293	14	1.115	3.0496	1.53772	6.05041	0.0014	-1	A02BA H2-receptor antagonists [DG:DG01481]	0.0103
p6m	A	A02BC	826	345	1776	531	-0.1202	0.8867	0.740783	1.06146	0.19	0	A02BC Proton pump inhibitors [DG:DG01646]	0.364
p6m	A	A02BX	1134	37	2253	54	-0.1471	0.8632	0.5449	1.36743	0.53	0	A02BX Other drugs for peptic ulcer and gastro-oesophageal reflux disease (GORD)	0.7
p6m	A	A03AA	1160	11	2290	17	0.067	1.0693	0.473984	2.4122	0.87	0	A03AA Synthetic anticholinergics, esters with tertiary amino group	0.916
p6m	A	A03AX	1166	5	2299	8	-0.1129	0.8932	0.263763	3.02513	0.86	0	A03AX Other drugs for functional gastrointestinal disorders	0.916
p6m	A	A03BB	1142	29	2289	18	0.8842	2.421	1.2915	4.53816	0.0058	-1	A03BB Belladonna alkaloids, semisynthetic, quaternary ammonium compounds	0.0369
p6m	A	A06AA	1116	55	2286	21	1.102	3.0102	1.76551	5.13463	5.2e-05	-1	A06AA Softeners, emollients	0.000712
p6m	A	A06AB	1082	89	2275	32	1.142	3.133	2.03303	4.82732	2.3e-07	-1	A06AB Contact laxatives	5.37e-06
p6m	A	A06AC	1165	6	2302	5	0.7542	2.1259	0.633204	7.13718	0.22	0	A06AC Bulk-forming laxatives	0.4
p6m	A	A06AD	1037	134	2225	82	0.7952	2.2149	1.63171	3.00664	3.4e-07	-1	A06AD Osmotically acting laxatives	6.8e-06
p6m	A	A07AA	1154	17	2300	7	1.1344	3.1093	1.23079	7.85507	0.016	-1	A07AA Antibiotics	0.0772
p6m	A	A07DA	1140	31	2289	18	0.8446	2.327	1.24627	4.34539	0.008	-1	A07DA Antipropulsives	0.0467
p6m	A	A07EC	1155	16	2292	15	0.4381	1.5497	0.728176	3.29818	0.26	0	A07EC Aminosalicylic acid and similar agents	0.433
p6m	A	A10AB	1105	66	2267	40	0.3629	1.4375	0.893346	2.31313	0.14	0	A10AB Insulins and analogues for injection, fast-acting	0.327
p6m	A	A10AC	1160	11	2301	6	0.2443	1.2767	0.42954	3.795	0.66	0	A10AC Insulins and analogues for injection, intermediate-acting	0.788
p6m	A	A10AD	1147	24	2299	8	0.6455	1.907	0.804249	4.52183	0.14	0	A10AD Insulins and analogues for injection, intermediate- or long-acting combined with fast-acting	0.327
p6m	A	A10AE	1153	18	2299	8	0.4546	1.5755	0.638287	3.88889	0.32	0	A10AE Insulins and analogues for injection, long-acting	0.498
p6m	A	A10BA	1062	109	2175	132	-0.3337	0.7163	0.507934	1.01012	0.057	0	A10BA Biguanides [DG:DG01684]	0.181
p6m	A	A10BB	1142	29	2262	45	-0.6107	0.543	0.316242	0.932178	0.027	1	A10BB Sulfonylureas	0.111
p6m	A	A10BH	1139	32	2269	38	-0.4715	0.6241	0.363899	1.07025	0.087	0	A10BH Dipeptidyl peptidase 4 (DPP-4) inhibitors [DG:DG01601]	0.239
p6m	A	A10BJ	1164	7	2291	16	-0.6965	0.4983	0.18448	1.34621	0.17	0	A10BJ Glucagon-like peptide-1 receptor (GLP-1) analogues	0.35
p6m	A	A10BK	1155	16	2275	32	-0.5085	0.6014	0.308602	1.17197	0.14	0	A10BK Sodium-glucose co-transporter 2 (SGLT2) inhibitors	0.327
p6m	A	A11CC	1130	41	2273	34	0.3521	1.4221	0.859327	2.35343	0.17	0	A11CC Vitamin D and analogues	0.35
p6m	A	A11DA	1143	28	2302	5	1.8797	6.5516	2.43203	17.6491	0.0002	-1	A11DA Vitamin B1, plain	0.00215
p6m	A	A12AX	1038	133	2186	121	0.428	1.5341	1.15879	2.03102	0.0028	-1	A12AX Calcium, combinations with vitamin D and/or other drugs	0.0187
p6m	A	B01AA	1143	28	2283	24	0.2507	1.2849	0.715154	2.30883	0.4	0	B01AA Vitamin K antagonists	0.554
p6m	A	B01AC	983	188	2100	207	-0.1219	0.8852	0.689199	1.13704	0.34	0	B01AC Platelet aggregation inhibitors excl. heparin	0.517
p6m	A	B01AF	1072	99	2222	85	0.3382	1.4024	1.01658	1.93471	0.039	-1	B01AF Direct factor Xa inhibitors	0.14
p6m	A	B03AA	1101	70	2276	31	0.944	2.5701	1.6204	4.07645	6.1e-05	-1	B03AA Iron bivalent, oral preparations	0.000712
p6m	A	B03BA	1125	46	2272	35	0.5271	1.694	1.04667	2.74193	0.032	-1	B03BA Vitamin B12 (cyanocobalamin and analogues)	0.124
p6m	A	B03BB	1111	60	2256	51	0.2043	1.2267	0.814643	1.84715	0.33	0	B03BB Folic acid and derivatives	0.508
p6m	A	C01AA	1158	13	2289	18	-0.458	0.6325	0.296027	1.35166	0.24	0	C01AA Digitalis glycosides [DG:DG01697]	0.42
p6m	A	C01DA	1113	58	2257	50	0.038	1.0387	0.66764	1.616	0.87	0	C01DA Organic nitrates	0.916
p6m	A	C01EB	1164	7	2294	13	-0.7777	0.4595	0.170428	1.23872	0.12	0	C01EB Other cardiac preparations	0.305
p6m	A	C02CA	1138	33	2270	37	-0.2401	0.7865	0.470978	1.31362	0.36	0	C02CA Alpha-adrenoreceptor antagonists	0.536
p6m	A	C03AA	1133	38	2246	61	-0.3354	0.7151	0.457776	1.11703	0.14	0	C03AA Thiazides, plain [DG:DG01749]	0.327
p6m	A	C03BA	1140	31	2277	30	0.3541	1.4249	0.827328	2.4542	0.2	0	C03BA Sulfonamides, plain	0.373
p6m	A	C03CA	1069	102	2254	53	0.6064	1.8339	1.26656	2.65535	0.0013	-1	C03CA Sulfonamides, plain	0.0101
p6m	A	C03DA	1147	24	2290	17	0.3628	1.4374	0.734043	2.81455	0.29	0	C03DA Aldosterone antagonists	0.461
p6m	A	C05AX	1159	12	2292	15	0.0174	1.0175	0.444896	2.32721	0.97	0	C05AX Other agents for treatment of hemorrhoids and anal fissures for topical use	0.991
p6m	A	C07AA	1157	14	2292	15	0.6941	2.0019	0.905712	4.42471	0.086	0	C07AA Beta blocking agents, non-selective	0.239
p6m	A	C07AB	1011	160	2124	183	0.0132	1.0133	0.785006	1.30807	0.92	0	C07AB Beta blocking agents, selective	0.947
p6m	A	C07AG	1163	8	2302	5	0.5238	1.6884	0.505429	5.6402	0.4	0	C07AG Alpha and beta blocking agents	0.554
p6m	A	C08CA	968	203	2012	295	-0.1361	0.8728	0.700706	1.0871	0.23	0	C08CA Dihydropyridine derivatives [DG:DG01928]	0.413
p6m	A	C08DB	1161	10	2294	13	-0.1996	0.8191	0.344827	1.9453	0.65	0	C08DB Benzothiazepine derivatives	0.788
p6m	A	C09AA	1005	166	2030	277	-0.309	0.7342	0.581828	0.926355	0.0092	1	C09AA ACE inhibitors, plain [DG:DG01501]	0.0495
p6m	A	C09CA	1076	95	2147	160	-0.3535	0.7022	0.524636	0.939886	0.018	1	C09CA Angiotensin II receptor blockers, plain [DG:DG01495]	0.0813
p6m	A	C10AA	789	382	1681	626	-0.5216	0.5936	0.493702	0.713634	2.9e-08	1	C10AA HMG CoA reductase inhibitors [DG:DG01660]	1.02e-06
p6m	A	C10AB	1163	8	2302	5	0.2846	1.3292	0.409628	4.31315	0.64	0	C10AB Fibrates	0.786
p6m	A	C10AX	1156	15	2286	21	-0.1919	0.8254	0.404656	1.68349	0.6	0	C10AX Other lipid modifying agents	0.771
p6m	A	D01AC	1122	49	2261	46	0.3144	1.3694	0.880169	2.13081	0.16	0	D01AC Imidazole and triazole derivatives	0.35
p6m	A	D01AE	1165	6	2301	6	0.0197	1.0199	0.286521	3.63028	0.98	0	D01AE Other antifungals for topical use	0.994
p6m	A	D02AC	1155	16	2282	25	-0.3977	0.6719	0.340049	1.32733	0.25	0	D02AC Soft paraffin and fat products	0.422
p6m	A	D02AE	1164	7	2299	8	0.1353	1.1449	0.377082	3.47635	0.81	0	D02AE Carbamide products	0.907
p6m	A	D02AX	1070	101	2211	96	0.2236	1.2506	0.913652	1.71185	0.16	0	D02AX Other emollients and protectives	0.35
p6m	A	D05AX	1165	6	2295	12	-0.1747	0.8397	0.294659	2.39292	0.74	0	D05AX Other antipsoriatics for topical use	0.849
p6m	A	D06AX	1163	8	2296	11	0.0626	1.0645	0.393098	2.88288	0.9	0	D06AX Other antibiotics for topical use	0.94
p6m	A	D07AA	1158	13	2295	12	0.7489	2.1146	0.901943	4.95756	0.085	0	D07AA Corticosteroids, weak (group I)	0.239
p6m	A	D07AB	1154	17	2299	8	1.4585	4.2993	1.74008	10.6225	0.0016	-1	D07AB Corticosteroids, moderately potent (group II)	0.0112
p6m	A	D07AC	1138	33	2269	38	0.2028	1.2248	0.740418	2.02624	0.43	0	D07AC Corticosteroids, potent (group III)	0.584
p6m	A	D07AD	1161	10	2296	11	0.4064	1.5014	0.597242	3.77427	0.39	0	D07AD Corticosteroids, very potent (group IV)	0.554
p6m	A	D07CC	1158	13	2288	19	-0.1376	0.8714	0.401104	1.89331	0.73	0	D07CC Corticosteroids, potent, combinations with antibiotics	0.845
p6m	A	D11AC	1166	5	2300	7	-0.3193	0.7267	0.206761	2.55368	0.62	0	D11AC Medicated shampoos	0.775
p6m	A	G01AF	1161	10	2301	6	1.1728	3.2311	1.07688	9.69489	0.036	-1	G01AF Imidazole derivatives	0.133
p6m	A	G03BA	1165	6	2298	9	-0.4125	0.662	0.217836	2.01184	0.47	0	G03BA 3-oxoandrosten (4) derivatives	0.633
p6m	A	G03CA	1141	30	2235	72	0.213	1.2374	0.77974	1.9638	0.37	0	G03CA Natural and semisynthetic estrogens, plain	0.545
p6m	A	G04BD	1139	32	2255	52	-0.3291	0.7196	0.443666	1.16713	0.18	0	G04BD Urinary antispasmodics	0.36
p6m	A	G04BE	1129	42	2247	60	-0.0008	0.9992	0.648617	1.53934	1	0	G04BE Drugs used in erectile dysfunction	1
p6m	A	G04CA	1164	7	2301	6	0.2566	1.2925	0.408601	4.08833	0.66	0	G04CA Alpha-adrenoreceptor antagonists	0.788
p6m	A	G04CB	1140	31	2276	31	-0.2552	0.7748	0.452697	1.32593	0.35	0	G04CB Testosterone-5-alpha reductase inhibitors	0.527
p6m	A	H02AB	1065	106	2252	55	1.1727	3.2307	2.24623	4.64651	2.5e-10	-1	H02AB Glucocorticoids	2.45e-08
p6m	A	H03AA	1098	73	2148	159	-0.3008	0.7402	0.541095	1.01264	0.06	0	H03AA Thyroid hormones	0.187
p6m	A	J01AA	1068	103	2248	59	1.095	2.9892	2.10133	4.24836	1.1e-09	-1	J01AA Tetracyclines [DG:DG01197]	5.13e-08
p6m	A	J01CA	1041	130	2224	83	0.9785	2.6604	1.95974	3.61147	3.5e-10	-1	J01CA Penicillins with extended spectrum [DG:DG01780]	2.45e-08
p6m	A	J01CE	1163	8	2300	7	0.8337	2.3018	0.748715	7.07641	0.15	0	J01CE Beta-lactamase sensitive penicillins [DG:DG01778]	0.339
p6m	A	J01CF	1107	64	2259	48	0.6804	1.9747	1.30989	2.97677	0.0012	-1	J01CF Beta-lactamase resistant penicillins [DG:DG01779]	0.00988
p6m	A	J01CR	1134	37	2292	15	1.3618	3.9031	2.04456	7.45105	3.7e-05	-1	J01CR Combinations of penicillins, incl. beta-lactamase inhibitors	0.000576
p6m	A	J01DB	1159	12	2302	5	1.163	3.1995	1.05514	9.70948	0.04	-1	J01DB First-generation cephalosporins [DG:DG01774]	0.14
p6m	A	J01EA	1143	28	2290	17	0.8699	2.3866	1.24646	4.56981	0.0087	-1	J01EA Trimethoprim and derivatives [DG:DG01581]	0.0487
p6m	A	J01FA	1129	42	2279	28	0.9327	2.5413	1.50569	4.28918	0.00048	-1	J01FA Macrolides [DG:DG01551]	0.00448
p6m	A	J01MA	1159	12	2300	7	0.6414	1.8992	0.715301	5.04243	0.2	0	J01MA Fluoroquinolones [DG:DG01549]	0.373
p6m	A	J01XE	1096	75	2247	60	0.6979	2.0094	1.37626	2.93396	0.0003	-1	J01XE Nitrofuran derivatives	0.003
p6m	A	J02AC	1160	11	2299	8	0.9636	2.6211	0.973775	7.05458	0.057	0	J02AC Triazole derivatives	0.181
p6m	A	J05AB	1157	14	2289	18	0.5496	1.7326	0.826076	3.63384	0.15	0	J05AB Nucleosides and nucleotides excl. reverse transcriptase inhibitors [DG:DG02840]	0.339
p6m	A	L02BG	1163	8	2286	21	-0.2214	0.8014	0.33741	1.90359	0.62	0	L02BG Aromatase inhibitors [DG:DG01596]	0.775
p6m	A	L04AX	1160	11	2284	23	-0.3327	0.717	0.331653	1.54989	0.4	0	L04AX Other immunosuppressants	0.554
p6m	A	M01AB	1164	7	2298	9	0.4582	1.5812	0.563802	4.43484	0.38	0	M01AB Acetic acid derivatives and related substances	0.548
p6m	A	M01AE	1128	43	2235	72	0.123	1.1309	0.749378	1.70672	0.56	0	M01AE Propionic acid derivatives	0.733
p6m	A	M01AH	1165	6	2301	6	0.3509	1.4203	0.42719	4.722	0.57	0	M01AH Coxibs	0.739
p6m	A	M02AA	1097	74	2233	74	0.189	1.208	0.846065	1.72483	0.3	0	M02AA Antiinflammatory preparations, non-steroids for topical use	0.472
p6m	A	M04AA	1124	47	2242	65	-0.2962	0.7437	0.487253	1.13501	0.17	0	M04AA Preparations inhibiting uric acid production	0.35
p6m	A	M04AC	1161	10	2297	10	0.2113	1.2353	0.465164	3.28071	0.67	0	M04AC Preparations with no effect on uric acid metabolism	0.788
p6m	A	M05BA	1126	45	2266	41	0.4721	1.6033	1.01767	2.52591	0.042	-1	M05BA Bisphosphonates [DG:DG01600]	0.143
p6m	A	N01BB	1159	12	2301	6	1.2755	3.5804	1.27186	10.0793	0.016	-1	N01BB Amides	0.0772
p6m	A	N02AA	1095	76	2280	27	1.3062	3.6921	2.31826	5.88022	3.8e-08	-1	N02AA Natural opium alkaloids	1.06e-06
p6m	A	N02AE	1150	21	2292	15	0.1807	1.1981	0.592782	2.4214	0.61	0	N02AE Oripavine derivatives	0.775
p6m	A	N02AJ	1083	88	2202	105	0.248	1.2814	0.934031	1.75799	0.12	0	N02AJ Opioids in combination with non-opioid analgesics	0.305
p6m	A	N02AX	1142	29	2279	28	0.1806	1.1979	0.683751	2.09864	0.53	0	N02AX Other opioids	0.7
p6m	A	N02BE	898	273	2052	255	0.3567	1.4286	1.15949	1.7601	0.00081	-1	N02BE Anilides	0.00709
p6m	A	N02CC	1165	6	2276	31	-0.615	0.5406	0.218847	1.33551	0.18	0	N02CC Selective serotonin (5HT1) agonists [DG:DG01943]	0.36
p6m	A	N03AF	1161	10	2302	5	1.091	2.9772	0.987692	8.97733	0.053	0	N03AF Carboxamide derivatives	0.177
p6m	A	N03AG	1164	7	2297	10	-0.101	0.9039	0.304058	2.68756	0.86	0	N03AG Fatty acid derivatives	0.916
p6m	A	N03AX	1057	114	2238	69	0.8392	2.3145	1.6592	3.22893	7.8e-07	-1	N03AX Other antiepileptics	1.37e-05
p6m	A	N04BA	1153	18	2296	11	0.6524	1.9202	0.882283	4.17923	0.1	0	N04BA Dopa and dopa derivatives	0.264
p6m	A	N04BC	1158	13	2298	9	0.635	1.887	0.767944	4.63672	0.17	0	N04BC Dopamine agonists	0.35
p6m	A	N05AB	1154	17	2298	9	1.018	2.7677	1.17336	6.52576	0.02	-1	N05AB Phenothiazines with piperazine structure	0.0875
p6m	A	N05AH	1163	8	2292	15	-0.1989	0.8196	0.324225	2.07206	0.67	0	N05AH Diazepines, oxazepines and thiazepines	0.788
p6m	A	N05AX	1153	18	2296	11	0.6963	2.0064	0.904744	4.44953	0.087	0	N05AX Other antipsychotics	0.239
p6m	A	N05BA	1131	40	2265	42	0.4063	1.5013	0.940087	2.39728	0.089	0	N05BA Benzodiazepine derivatives [DG:DG01914]	0.24
p6m	A	N05CD	1143	28	2293	14	0.8342	2.3029	1.1722	4.52445	0.015	-1	N05CD Benzodiazepine derivatives	0.0772
p6m	A	N05CF	1144	27	2275	32	0.3046	1.3561	0.785596	2.34103	0.27	0	N05CF Benzodiazepine related drugs	0.445
p6m	A	N06AA	1104	67	2209	98	-0.0469	0.9542	0.671639	1.3555	0.79	0	N06AA Non-selective monoamine reuptake inhibitors [DG:DG01730]	0.892
p6m	A	N06AB	1069	102	2123	184	-0.0141	0.986	0.738913	1.31576	0.92	0	N06AB Selective serotonin reuptake inhibitors	0.947
p6m	A	N06AX	1095	76	2231	76	0.403	1.4963	1.0474	2.13752	0.027	-1	N06AX Other antidepressants	0.111
p6m	A	N06DA	1145	26	2276	31	-0.0816	0.9216	0.523851	1.62132	0.78	0	N06DA Anticholinesterases	0.888
p6m	A	N06DX	1142	29	2276	31	-0.0464	0.9546	0.544095	1.67494	0.87	0	N06DX Other anti-dementia drugs	0.916
p6m	A	N07CA	1157	14	2288	19	-0.1341	0.8745	0.404991	1.88849	0.73	0	N07CA Antivertigo preparations	0.845
p6m	A	P01AB	1162	9	2298	9	0.5745	1.7762	0.671402	4.69898	0.25	0	P01AB Nitroimidazole derivatives	0.422
p6m	A	P01BA	1162	9	2299	8	0.4706	1.601	0.565824	4.53013	0.38	0	P01BA Aminoquinolines	0.548
p6m	A	P01BC	1147	24	2290	17	0.3919	1.4798	0.755907	2.89712	0.25	0	P01BC Methanolquinolines	0.422
p6m	A	R01AD	1121	50	2215	92	-0.2567	0.7736	0.52685	1.13584	0.19	0	R01AD Corticosteroids	0.364
p6m	A	R03AC	1037	134	2154	153	0.3161	1.3718	1.02494	1.83596	0.034	-1	R03AC Selective beta-2-adrenoreceptor agonists	0.129
p6m	A	R03AK	1097	74	2196	111	0.0351	1.0357	0.725575	1.47842	0.85	0	R03AK Adrenergics in combination with corticosteroids or other drugs, excl. anticholinergics	0.916
p6m	A	R03AL	1148	23	2298	9	1	2.7183	1.19703	6.17667	0.017	-1	R03AL Adrenergics in combination with anticholinergics incl. triple combinations with corticosteroids	0.0793
p6m	A	R03BA	1140	31	2238	69	-0.4515	0.6367	0.392621	1.0324	0.067	0	R03BA Glucocorticoids	0.204
p6m	A	R03BB	1145	26	2280	27	0.066	1.0682	0.57842	1.97282	0.83	0	R03BB Anticholinergics	0.915
p6m	A	R03DC	1163	8	2290	17	-0.5459	0.5793	0.235073	1.42766	0.24	0	R03DC Leukotriene receptor antagonists	0.42
p6m	A	R05CB	1149	22	2293	14	0.5645	1.7585	0.847114	3.65057	0.13	0	R05CB Mucolytics	0.325
p6m	A	R05DA	1124	47	2264	43	0.6291	1.876	1.19273	2.95074	0.0065	-1	R05DA Opium alkaloids and derivatives	0.0396
p6m	A	R06AE	1099	72	2260	47	0.8329	2.3001	1.53145	3.4545	6e-05	-1	R06AE Piperazine derivatives	0.000712
p6m	A	R06AX	1137	34	2254	53	-0.0015	0.9985	0.621147	1.60522	0.99	0	R06AX Other antihistamines for systemic use	0.997
p6m	A	S01AA	1152	19	2293	14	0.4795	1.6152	0.760979	3.42842	0.21	0	S01AA Antibiotics	0.387
p6m	A	S01EC	1162	9	2300	7	0.443	1.5574	0.535556	4.52915	0.42	0	S01EC Carbonic anhydrase inhibitors	0.576
p6m	A	S01ED	1163	8	2292	15	-0.5013	0.6057	0.242603	1.51239	0.28	0	S01ED Beta blocking agents	0.456
p6m	A	S01EE	1153	18	2274	33	-0.4231	0.655	0.350064	1.22554	0.19	0	S01EE Prostaglandin analogues	0.364
p6m	A	S01GX	1161	10	2296	11	0.2236	1.2506	0.494267	3.16424	0.64	0	S01GX Other antiallergics	0.786
p6m	A	S01XA	1112	59	2237	70	0.045	1.046	0.707749	1.54599	0.82	0	S01XA Other ophthalmologicals	0.911
p6m	A	V07AY	1119	52	2274	33	0.5543	1.7406	1.0611	2.85538	0.028	-1	V07AY Other non-therapeutic auxiliary products	0.112
p6m	B	A02BA	141	6	3294	37	0.8888	2.4323	0.924593	6.39849	0.072	0	A02BA H2-receptor antagonists [DG:DG01481]	0.163
p6m	B	A02BC	93	54	2509	822	0.1561	1.169	0.799672	1.70887	0.42	0	A02BC Proton pump inhibitors [DG:DG01646]	0.574
p6m	B	A02BX	139	8	3248	83	0.487	1.6274	0.733522	3.61046	0.23	0	A02BX Other drugs for peptic ulcer and gastro-oesophageal reflux disease (GORD)	0.394
p6m	B	A03BB	131	16	3300	31	2.1152	8.2915	3.98943	17.2329	1.5e-08	-1	A03BB Belladonna alkaloids, semisynthetic, quaternary ammonium compounds	3.85e-07
p6m	B	A03FA	140	7	3315	16	1.855	6.3914	2.25851	18.0874	0.00047	-1	A03FA Propulsives [DG:DG01763]	0.00362
p6m	B	A06AA	136	11	3266	65	0.5758	1.7785	0.879522	3.59629	0.11	0	A06AA Softeners, emollients	0.217
p6m	B	A06AB	117	30	3240	91	1.3951	4.0354	2.44217	6.66789	5.2e-08	-1	A06AB Contact laxatives	1e-06
p6m	B	A06AD	112	35	3150	181	0.8963	2.4505	1.56974	3.82559	8e-05	-1	A06AD Osmotically acting laxatives	0.00077
p6m	B	A07DA	141	6	3288	43	0.7733	2.1669	0.801091	5.86109	0.13	0	A07DA Antipropulsives	0.25
p6m	B	A10AB	133	14	3239	92	0.7636	2.1461	0.99565	4.62574	0.051	0	A10AB Insulins and analogues for injection, fast-acting	0.123
p6m	B	A10AD	142	5	3304	27	0.4762	1.61	0.510475	5.07773	0.42	0	A10AD Insulins and analogues for injection, intermediate- or long-acting combined with fast-acting	0.574
p6m	B	A10AE	141	6	3311	20	0.9932	2.6999	0.856209	8.51364	0.09	0	A10AE Insulins and analogues for injection, long-acting	0.192
p6m	B	A10BA	134	13	3103	228	-0.2985	0.742	0.363728	1.51349	0.41	0	A10BA Biguanides [DG:DG01684]	0.574
p6m	B	A10BB	142	5	3262	69	0.0844	1.0881	0.381538	3.10292	0.88	0	A10BB Sulfonylureas	0.928
p6m	B	A10BH	142	5	3266	65	-0.1941	0.8236	0.293848	2.30841	0.71	0	A10BH Dipeptidyl peptidase 4 (DPP-4) inhibitors [DG:DG01601]	0.804
p6m	B	A11CC	139	8	3264	67	0.3305	1.3917	0.600935	3.22314	0.44	0	A11CC Vitamin D and analogues	0.574
p6m	B	A11DA	139	8	3306	25	1.0768	2.9353	1.18001	7.30139	0.021	-1	A11DA Vitamin B1, plain	0.0647
p6m	B	A12AX	127	20	3097	234	0.1624	1.1763	0.688519	2.00975	0.55	0	A12AX Calcium, combinations with vitamin D and/or other drugs	0.672
p6m	B	B01AC	113	34	2970	361	0.0297	1.0302	0.653085	1.62496	0.9	0	B01AC Platelet aggregation inhibitors excl. heparin	0.936
p6m	B	B01AF	127	20	3167	164	0.2434	1.2756	0.746827	2.17881	0.37	0	B01AF Direct factor Xa inhibitors	0.548
p6m	B	B03AA	131	16	3246	85	0.9376	2.5537	1.36511	4.77736	0.0034	-1	B03AA Iron bivalent, oral preparations	0.0175
p6m	B	B03BA	141	6	3256	75	-0.0241	0.9761	0.395993	2.40623	0.96	0	B03BA Vitamin B12 (cyanocobalamin and analogues)	0.97
p6m	B	B03BB	132	15	3235	96	0.5065	1.6594	0.887635	3.10224	0.11	0	B03BB Folic acid and derivatives	0.217
p6m	B	C01DA	139	8	3231	100	-0.2202	0.8024	0.351777	1.83015	0.6	0	C01DA Organic nitrates	0.7
p6m	B	C02CA	142	5	3266	65	-0.111	0.895	0.335091	2.3903	0.82	0	C02CA Alpha-adrenoreceptor antagonists	0.902
p6m	B	C03AA	140	7	3239	92	0.0394	1.0402	0.449298	2.40826	0.93	0	C03AA Thiazides, plain [DG:DG01749]	0.955
p6m	B	C03BA	138	9	3279	52	0.9691	2.6355	1.17309	5.92084	0.019	-1	C03BA Sulfonamides, plain	0.0636
p6m	B	C03CA	127	20	3196	135	0.2119	1.236	0.697911	2.18889	0.47	0	C03CA Sulfonamides, plain	0.593
p6m	B	C07AB	114	33	3021	310	0.403	1.4964	0.946276	2.36623	0.085	0	C07AB Beta blocking agents, selective	0.187
p6m	B	C08CA	115	32	2865	466	0.0467	1.0478	0.670274	1.63787	0.84	0	C08CA Dihydropyridine derivatives [DG:DG01928]	0.909
p6m	B	C09AA	123	24	2912	419	-0.1431	0.8667	0.53077	1.41527	0.57	0	C09AA ACE inhibitors, plain [DG:DG01501]	0.675
p6m	B	C09CA	131	16	3092	239	-0.074	0.9286	0.519435	1.6602	0.8	0	C09CA Angiotensin II receptor blockers, plain [DG:DG01495]	0.893
p6m	B	C10AA	85	62	2385	946	-0.1078	0.8978	0.618611	1.30295	0.57	0	C10AA HMG CoA reductase inhibitors [DG:DG01660]	0.675
p6m	B	D01AC	132	15	3251	80	0.7978	2.2207	1.16111	4.2473	0.016	-1	D01AC Imidazole and triazole derivatives	0.0616
p6m	B	D02AX	119	28	3162	169	0.6705	1.9552	1.20022	3.18502	0.0071	-1	D02AX Other emollients and protectives	0.0322
p6m	B	D07AC	141	6	3266	65	0.2863	1.3315	0.533287	3.32437	0.54	0	D07AC Corticosteroids, potent (group III)	0.671
p6m	B	G04BD	141	6	3253	78	-0.0833	0.9201	0.377831	2.24045	0.85	0	G04BD Urinary antispasmodics	0.909
p6m	B	G04BE	140	7	3236	95	0.5447	1.7241	0.726613	4.09085	0.22	0	G04BE Drugs used in erectile dysfunction	0.385
p6m	B	G04CA	142	5	3323	8	2.0408	7.6965	2.06836	28.6395	0.0023	-1	G04CA Alpha-adrenoreceptor antagonists	0.0136
p6m	B	G04CB	142	5	3274	57	-0.6525	0.5207	0.195333	1.38825	0.19	0	G04CB Testosterone-5-alpha reductase inhibitors	0.357
p6m	B	H02AB	125	22	3192	139	1.1446	3.141	1.80559	5.46422	5.1e-05	-1	H02AB Glucocorticoids	0.000561
p6m	B	H03AA	129	18	3117	214	0.71	2.0339	1.13763	3.63643	0.017	-1	H03AA Thyroid hormones	0.0623
p6m	B	J01AA	128	19	3188	143	0.8695	2.3858	1.35586	4.19794	0.0026	-1	J01AA Tetracyclines [DG:DG01197]	0.0143
p6m	B	J01CA	119	28	3146	185	0.8893	2.4335	1.49938	3.94971	0.00032	-1	J01CA Penicillins with extended spectrum [DG:DG01780]	0.00274
p6m	B	J01CF	131	16	3235	96	0.729	2.073	1.11141	3.86668	0.022	-1	J01CF Beta-lactamase resistant penicillins [DG:DG01779]	0.0652
p6m	B	J01CR	140	7	3286	45	0.7265	2.0678	0.841769	5.07966	0.11	0	J01CR Combinations of penicillins, incl. beta-lactamase inhibitors	0.217
p6m	B	J01EA	140	7	3293	38	0.8609	2.3653	0.966792	5.78659	0.059	0	J01EA Trimethoprim and derivatives [DG:DG01581]	0.138
p6m	B	J01FA	139	8	3269	62	0.886	2.4253	1.05542	5.57325	0.037	-1	J01FA Macrolides [DG:DG01551]	0.102
p6m	B	J01XE	129	18	3214	117	0.7782	2.1775	1.21819	3.89219	0.0086	-1	J01XE Nitrofuran derivatives	0.0368
p6m	B	M01AE	140	7	3223	108	0.4383	1.55	0.65743	3.65442	0.32	0	M01AE Propionic acid derivatives	0.524
p6m	B	M02AA	131	16	3199	132	0.3799	1.4621	0.807267	2.64813	0.21	0	M02AA Antiinflammatory preparations, non-steroids for topical use	0.385
p6m	B	M04AA	139	8	3227	104	-0.0157	0.9844	0.437857	2.21304	0.97	0	M04AA Preparations inhibiting uric acid production	0.97
p6m	B	M05BA	135	12	3257	74	0.8821	2.4161	1.20143	4.85877	0.013	-1	M05BA Bisphosphonates [DG:DG01600]	0.0527
p6m	B	N02AA	117	30	3258	73	1.9004	6.6889	3.97762	11.2483	7.7e-13	-1	N02AA Natural opium alkaloids	3.12e-11
p6m	B	N02AE	137	10	3305	26	1.2909	3.636	1.58898	8.32001	0.0022	-1	N02AE Oripavine derivatives	0.0136
p6m	B	N02AJ	133	14	3152	179	0.3158	1.3713	0.731053	2.57229	0.33	0	N02AJ Opioids in combination with non-opioid analgesics	0.529
p6m	B	N02BE	82	65	2868	463	0.8222	2.2756	1.56523	3.30833	1.7e-05	-1	N02BE Anilides	0.000218
p6m	B	N03AX	119	28	3176	155	1.1558	3.1766	1.92831	5.23285	5.7e-06	-1	N03AX Other antiepileptics	8.78e-05
p6m	B	N04BA	141	6	3308	23	0.9958	2.7069	1.03232	7.09794	0.043	-1	N04BA Dopa and dopa derivatives	0.11
p6m	B	N05AX	140	7	3309	22	1.1645	3.2044	1.19408	8.5991	0.021	-1	N05AX Other antipsychotics	0.0647
p6m	B	N05BA	134	13	3262	69	0.9984	2.7139	1.34986	5.45642	0.0051	-1	N05BA Benzodiazepine derivatives [DG:DG01914]	0.0245
p6m	B	N05CD	125	22	3311	20	2.561	12.9485	6.42341	26.1022	8.1e-13	-1	N05CD Benzodiazepine derivatives	3.12e-11
p6m	B	N06AA	141	6	3172	159	-0.3422	0.7102	0.293405	1.71902	0.45	0	N06AA Non-selective monoamine reuptake inhibitors [DG:DG01730]	0.578
p6m	B	N06AB	131	16	3061	270	0.2878	1.3334	0.727279	2.44482	0.35	0	N06AB Selective serotonin reuptake inhibitors	0.539
p6m	B	N06AX	134	13	3192	139	0.3843	1.4686	0.764889	2.81983	0.25	0	N06AX Other antidepressants	0.418
p6m	B	N06DA	138	9	3283	48	0.3431	1.4093	0.633982	3.13262	0.4	0	N06DA Anticholinesterases	0.574
p6m	B	N06DX	134	13	3284	47	0.7294	2.0739	1.00123	4.29582	0.05	-1	N06DX Other anti-dementia drugs	0.123
p6m	B	R01AD	142	5	3194	137	-0.3914	0.6761	0.258079	1.77138	0.43	0	R01AD Corticosteroids	0.574
p6m	B	R03AC	129	18	3062	269	0.3062	1.3582	0.728727	2.53147	0.34	0	R03AC Selective beta-2-adrenoreceptor agonists	0.534
p6m	B	R03AK	138	9	3155	176	0.168	1.1829	0.525984	2.66038	0.69	0	R03AK Adrenergics in combination with corticosteroids or other drugs, excl. anticholinergics	0.793
p6m	B	R03AL	142	5	3304	27	0.6908	1.9954	0.666718	5.97174	0.22	0	R03AL Adrenergics in combination with anticholinergics incl. triple combinations with corticosteroids	0.385
p6m	B	R05CB	141	6	3301	30	1.0801	2.9449	1.07678	8.05419	0.035	-1	R05CB Mucolytics	0.0998
p6m	B	R05DA	139	8	3249	82	0.3786	1.4603	0.635804	3.35399	0.37	0	R05DA Opium alkaloids and derivatives	0.548
p6m	B	R06AE	133	14	3226	105	0.7838	2.1899	1.1416	4.20072	0.018	-1	R06AE Piperazine derivatives	0.063
p6m	B	S01AA	139	8	3306	25	1.5243	4.5918	1.81742	11.6015	0.0013	-1	S01AA Antibiotics	0.0091
p6m	B	S01XA	137	10	3212	119	0.2907	1.3374	0.638034	2.80329	0.44	0	S01XA Other ophthalmologicals	0.574
p6m	B	V07AY	135	12	3258	73	0.7971	2.2191	1.03054	4.77867	0.042	-1	V07AY Other non-therapeutic auxiliary products	0.11
p6m	C	A01AB	1146	25	360379	2157	0.9241	2.5196	1.6811	3.77645	7.6e-06	-1	A01AB Antiinfectives and antiseptics for local oral treatment	2.57e-05
p6m	C	A01AD	1160	11	362037	499	1.4363	4.2052	2.26412	7.81025	5.4e-06	-1	A01AD Other agents for local oral treatment	1.91e-05
p6m	C	A02BA	1142	29	359842	2694	0.7102	2.0345	1.39294	2.97155	0.00024	-1	A02BA H2-receptor antagonists [DG:DG01481]	0.000623
p6m	C	A02BC	826	345	296958	65578	0.2183	1.244	1.08524	1.42588	0.0017	-1	A02BC Proton pump inhibitors [DG:DG01646]	0.00371
p6m	C	A02BX	1134	37	358240	4296	0.5521	1.737	1.24051	2.43214	0.0013	-1	A02BX Other drugs for peptic ulcer and gastro-oesophageal reflux disease (GORD)	0.00292
p6m	C	A03AA	1160	11	360580	1956	0.1804	1.1977	0.654603	2.19146	0.56	0	A03AA Synthetic anticholinergics, esters with tertiary amino group	0.641
p6m	C	A03AX	1166	5	361747	789	0.1985	1.2195	0.497469	2.98963	0.66	0	A03AX Other drugs for functional gastrointestinal disorders	0.721
p6m	C	A03BB	1142	29	361304	1232	1.5116	4.5339	3.08092	6.67207	1.7e-14	-1	A03BB Belladonna alkaloids, semisynthetic, quaternary ammonium compounds	1.49e-13
p6m	C	A03FA	1151	20	361786	750	1.5987	4.9467	3.11909	7.84529	1.1e-11	-1	A03FA Propulsives [DG:DG01763]	7.3e-11
p6m	C	A04AA	1166	5	362390	146	2.0522	7.7849	3.12851	19.3716	1e-05	-1	A04AA Serotonin (5HT3) antagonists	3.25e-05
p6m	C	A06AA	1116	55	360436	2100	1.4978	4.472	3.35434	5.9621	1.8e-24	-1	A06AA Softeners, emollients	2.49e-23
p6m	C	A06AB	1082	89	359855	2681	1.6117	5.0113	3.94891	6.35961	4.1e-40	-1	A06AB Contact laxatives	1.7e-38
p6m	C	A06AC	1165	6	361235	1301	0.1463	1.1575	0.515653	2.59848	0.72	0	A06AC Bulk-forming laxatives	0.781
p6m	C	A06AD	1037	134	354297	8239	1.3018	3.676	3.03856	4.44719	6.2e-41	-1	A06AD Osmotically acting laxatives	3.43e-39
p6m	C	A06AX	1166	5	362122	414	0.8734	2.395	0.971735	5.90264	0.058	0	A06AX Other drugs for constipation	0.0926
p6m	C	A07AA	1154	17	361897	639	1.6936	5.4391	3.29881	8.96789	3.2e-11	-1	A07AA Antibiotics	2.04e-10
p6m	C	A07DA	1140	31	360719	1817	1.1708	3.2247	2.22058	4.68275	7.7e-10	-1	A07DA Antipropulsives	4.26e-09
p6m	C	A07EC	1155	16	360116	2420	0.3947	1.4839	0.900833	2.44435	0.12	0	A07EC Aminosalicylic acid and similar agents	0.169
p6m	C	A10AB	1105	66	357218	5318	0.4591	1.5826	1.18246	2.1182	0.002	-1	A10AB Insulins and analogues for injection, fast-acting	0.00415
p6m	C	A10AC	1160	11	361852	684	0.5051	1.6571	0.889978	3.08558	0.11	0	A10AC Insulins and analogues for injection, intermediate-acting	0.159
p6m	C	A10AD	1147	24	361418	1118	0.796	2.2167	1.4361	3.42151	0.00032	-1	A10AD Insulins and analogues for injection, intermediate- or long-acting combined with fast-acting	0.000817
p6m	C	A10AE	1153	18	360802	1734	0.1439	1.1548	0.705846	1.88921	0.57	0	A10AE Insulins and analogues for injection, long-acting	0.644
p6m	C	A10BA	1062	109	346774	15762	-0.097	0.9076	0.715749	1.15075	0.42	0	A10BA Biguanides [DG:DG01684]	0.502
p6m	C	A10BB	1142	29	358108	4428	-0.3074	0.7353	0.496052	1.09007	0.13	0	A10BB Sulfonylureas	0.18
p6m	C	A10BH	1139	32	358403	4133	-0.0951	0.9093	0.624249	1.32457	0.62	0	A10BH Dipeptidyl peptidase 4 (DPP-4) inhibitors [DG:DG01601]	0.682
p6m	C	A10BJ	1164	7	361280	1256	-0.6177	0.5392	0.252048	1.15338	0.11	0	A10BJ Glucagon-like peptide-1 receptor (GLP-1) analogues	0.159
p6m	C	A10BK	1155	16	359983	2553	-0.2413	0.7856	0.470743	1.31108	0.36	0	A10BK Sodium-glucose co-transporter 2 (SGLT2) inhibitors	0.439
p6m	C	A11CC	1130	41	359204	3332	0.7605	2.1393	1.54095	2.97038	5.6e-06	-1	A11CC Vitamin D and analogues	1.94e-05
p6m	C	A11DA	1143	28	361510	1026	1.3947	4.0339	2.69872	6.02974	1e-11	-1	A11DA Vitamin B1, plain	6.92e-11
p6m	C	A11EX	1166	5	362012	524	0.0905	1.0947	0.441355	2.71535	0.84	0	A11EX Vitamin B-complex, other combinations	0.855
p6m	C	A12AX	1038	133	340509	22027	0.4905	1.6332	1.35061	1.97482	4.2e-07	-1	A12AX Calcium, combinations with vitamin D and/or other drugs	1.7e-06
p6m	C	B01AA	1143	28	358702	3834	0.2664	1.3053	0.888351	1.91797	0.17	0	B01AA Vitamin K antagonists	0.228
p6m	C	B01AB	1164	7	362332	204	1.9606	7.1039	3.27555	15.4068	6.9e-07	-1	B01AB Heparin group	2.73e-06
p6m	C	B01AC	983	188	332780	29756	0.0989	1.104	0.923311	1.32001	0.28	0	B01AC Platelet aggregation inhibitors excl. heparin	0.352
p6m	C	B01AF	1072	99	350204	12332	0.5772	1.7811	1.43706	2.20742	1.4e-07	-1	B01AF Direct factor Xa inhibitors	6.46e-07
p6m	C	B03AA	1101	70	358768	3768	1.0636	2.8968	2.23532	3.75406	8.9e-16	-1	B03AA Iron bivalent, oral preparations	8.21e-15
p6m	C	B03BA	1125	46	358820	3716	0.8889	2.4325	1.79448	3.29731	1e-08	-1	B03BA Vitamin B12 (cyanocobalamin and analogues)	5.19e-08
p6m	C	B03BB	1111	60	357781	4755	0.8732	2.3946	1.8263	3.13982	2.7e-10	-1	B03BB Folic acid and derivatives	1.55e-09
p6m	C	B05CB	1163	8	362377	159	2.1339	8.4478	4.05612	17.5944	1.2e-08	-1	B05CB Salt solutions	6.04e-08
p6m	C	C01AA	1158	13	360866	1670	0.2135	1.238	0.709115	2.1613	0.45	0	C01AA Digitalis glycosides [DG:DG01697]	0.534
p6m	C	C01CA	1166	5	362159	377	1.3612	3.9007	1.60164	9.49999	0.0027	-1	C01CA Adrenergic and dopaminergic agents	0.00547
p6m	C	C01DA	1113	58	357699	4837	0.421	1.5235	1.13318	2.04829	0.0053	-1	C01DA Organic nitrates	0.0101
p6m	C	C01DX	1160	11	361466	1070	-0.0489	0.9522	0.513206	1.76687	0.88	0	C01DX Other vasodilators used in cardiac diseases	0.891
p6m	C	C01EB	1164	7	361729	807	-0.1012	0.9038	0.421541	1.93769	0.8	0	C01EB Other cardiac preparations	0.846
p6m	C	C02CA	1138	33	356552	5984	-0.1641	0.8487	0.594807	1.21085	0.37	0	C02CA Alpha-adrenoreceptor antagonists	0.448
p6m	C	C03AA	1133	38	351906	10630	-0.2502	0.7787	0.559408	1.08382	0.14	0	C03AA Thiazides, plain [DG:DG01749]	0.192
p6m	C	C03BA	1140	31	356926	5610	0.1623	1.1762	0.818504	1.69024	0.38	0	C03BA Sulfonamides, plain	0.457
p6m	C	C03CA	1069	102	355361	7175	0.7549	2.1274	1.69797	2.66548	5.3e-11	-1	C03CA Sulfonamides, plain	3.26e-10
p6m	C	C03DA	1147	24	360011	2525	0.2791	1.322	0.868069	2.01325	0.19	0	C03DA Aldosterone antagonists	0.248
p6m	C	C05AX	1159	12	361397	1139	0.8488	2.3368	1.30964	4.16941	0.0041	-1	C05AX Other agents for treatment of hemorrhoids and anal fissures for topical use	0.00801
p6m	C	C07AA	1157	14	359854	2682	0.3617	1.4357	0.8442	2.44165	0.18	0	C07AA Beta blocking agents, non-selective	0.239
p6m	C	C07AB	1011	160	332675	29861	-0.047	0.9541	0.792386	1.14883	0.62	0	C07AB Beta blocking agents, selective	0.682
p6m	C	C07AG	1163	8	362141	395	1.0277	2.7947	1.36559	5.71939	0.0049	-1	C07AG Alpha and beta blocking agents	0.00946
p6m	C	C08CA	968	203	318062	44474	0.0088	1.0088	0.858686	1.18521	0.92	0	C08CA Dihydropyridine derivatives [DG:DG01928]	0.926
p6m	C	C08DB	1161	10	359990	2546	-0.5069	0.6024	0.320445	1.1323	0.12	0	C08DB Benzothiazepine derivatives	0.169
p6m	C	C09AA	1005	166	320272	42264	-0.2798	0.756	0.635177	0.899693	0.0016	1	C09AA ACE inhibitors, plain [DG:DG01501]	0.00354
p6m	C	C09CA	1076	95	338827	23709	-0.2581	0.7725	0.621159	0.960816	0.02	1	C09CA Angiotensin II receptor blockers, plain [DG:DG01495]	0.0357
p6m	C	C10AA	789	382	269137	93399	-0.2098	0.8107	0.708341	0.927899	0.0023	1	C10AA HMG CoA reductase inhibitors [DG:DG01660]	0.00471
p6m	C	C10AB	1163	8	361376	1160	0.0773	1.0803	0.534164	2.18488	0.83	0	C10AB Fibrates	0.855
p6m	C	C10AX	1156	15	359644	2892	-0.1441	0.8658	0.515865	1.45313	0.58	0	C10AX Other lipid modifying agents	0.651
p6m	C	D01AC	1122	49	359203	3333	1.0547	2.8711	2.13399	3.86273	3.2e-12	-1	D01AC Imidazole and triazole derivatives	2.41e-11
p6m	C	D01AE	1165	6	361912	624	0.6803	1.9746	0.8667	4.49853	0.1	0	D01AE Other antifungals for topical use	0.151
p6m	C	D01BA	1165	6	362113	423	1.3609	3.8999	1.72477	8.81794	0.0011	-1	D01BA Antifungals for systemic use	0.0025
p6m	C	D02AC	1155	16	359662	2874	0.1491	1.1608	0.702296	1.91855	0.56	0	D02AC Soft paraffin and fat products	0.641
p6m	C	D02AE	1164	7	361823	713	0.6353	1.8876	0.889208	4.00699	0.098	0	D02AE Carbamide products	0.149
p6m	C	D02AX	1070	101	354202	8334	0.8941	2.4452	1.97339	3.0298	3e-16	-1	D02AX Other emollients and protectives	2.93e-15
p6m	C	D05AX	1165	6	361388	1148	0.1085	1.1146	0.494662	2.51129	0.79	0	D05AX Other antipsoriatics for topical use	0.841
p6m	C	D06AX	1163	8	361760	776	0.6308	1.8792	0.898907	3.92843	0.094	0	D06AX Other antibiotics for topical use	0.144
p6m	C	D07AA	1158	13	361361	1175	0.9932	2.7	1.54188	4.72796	0.00051	-1	D07AA Corticosteroids, weak (group I)	0.00125
p6m	C	D07AB	1154	17	361386	1150	1.2819	3.6033	2.20973	5.87588	2.8e-07	-1	D07AB Corticosteroids, moderately potent (group II)	1.19e-06
p6m	C	D07AC	1138	33	358901	3635	0.7678	2.1551	1.51584	3.06386	1.9e-05	-1	D07AC Corticosteroids, potent (group III)	5.95e-05
p6m	C	D07AD	1161	10	361270	1266	0.7103	2.0345	1.08398	3.81865	0.027	-1	D07AD Corticosteroids, very potent (group IV)	0.0467
p6m	C	D07CA	1162	9	362094	442	1.607	4.9876	2.55324	9.74308	2.6e-06	-1	D07CA Corticosteroids, weak, combinations with antibiotics	9.59e-06
p6m	C	D07CC	1158	13	361609	927	1.087	2.9654	1.68887	5.20666	0.00015	-1	D07CC Corticosteroids, potent, combinations with antibiotics	0.000402
p6m	C	D09AA	1166	5	362384	152	1.6198	5.0518	2.02922	12.5768	0.0005	-1	D09AA Medicated dressings with antiinfectives	0.00124
p6m	C	D11AC	1166	5	361972	564	0.5372	1.7113	0.70221	4.17023	0.24	0	D11AC Medicated shampoos	0.309
p6m	C	G01AF	1161	10	361938	598	1.2485	3.485	1.83577	6.61596	0.00014	-1	G01AF Imidazole derivatives	0.000387
p6m	C	G03BA	1165	6	361861	675	0.4288	1.5354	0.679338	3.47037	0.3	0	G03BA 3-oxoandrosten (4) derivatives	0.372
p6m	C	G03CA	1141	30	353542	8994	0.3653	1.4409	0.993784	2.08915	0.054	0	G03CA Natural and semisynthetic estrogens, plain	0.0888
p6m	C	G04BD	1139	32	356002	6534	-0.01	0.9901	0.692543	1.41539	0.96	0	G04BD Urinary antispasmodics	0.96
p6m	C	G04BE	1129	42	355881	6655	0.2571	1.2932	0.94235	1.77461	0.11	0	G04BE Drugs used in erectile dysfunction	0.159
p6m	C	G04CA	1164	7	361665	871	0.2865	1.3317	0.624546	2.8396	0.46	0	G04CA Alpha-adrenoreceptor antagonists	0.542
p6m	C	G04CB	1140	31	356491	6045	-0.0402	0.9606	0.666145	1.38513	0.83	0	G04CB Testosterone-5-alpha reductase inhibitors	0.855
p6m	C	H02AB	1065	106	356480	6056	1.4328	4.1902	3.38583	5.18576	1.2e-39	-1	H02AB Glucocorticoids	3.98e-38
p6m	C	H03AA	1098	73	338961	23575	-0.1974	0.8209	0.643363	1.0474	0.11	0	H03AA Thyroid hormones	0.159
p6m	C	J01AA	1068	103	359039	3497	1.9395	6.9554	5.59907	8.64031	9.3e-69	-1	J01AA Tetracyclines [DG:DG01197]	7.72e-67
p6m	C	J01CA	1041	130	358775	3761	2.1512	8.5951	7.07908	10.4357	1.1e-104	-1	J01CA Penicillins with extended spectrum [DG:DG01780]	1.83e-102
p6m	C	J01CE	1163	8	361666	870	0.7895	2.2023	1.09045	4.44785	0.028	-1	J01CE Beta-lactamase sensitive penicillins [DG:DG01778]	0.0479
p6m	C	J01CF	1107	64	358883	3653	1.42	4.137	3.18552	5.37256	1.8e-26	-1	J01CF Beta-lactamase resistant penicillins [DG:DG01779]	3.32e-25
p6m	C	J01CR	1134	37	361192	1344	1.8317	6.2444	4.4315	8.79896	1.2e-25	-1	J01CR Combinations of penicillins, incl. beta-lactamase inhibitors	1.99e-24
p6m	C	J01DB	1159	12	361676	860	1.1201	3.0651	1.71559	5.47633	0.00015	-1	J01DB First-generation cephalosporins [DG:DG01774]	0.000402
p6m	C	J01EA	1143	28	361090	1446	1.3965	4.041	2.7338	5.97327	2.5e-12	-1	J01EA Trimethoprim and derivatives [DG:DG01581]	1.98e-11
p6m	C	J01EE	1166	5	362349	187	1.6386	5.1481	2.06592	12.8287	0.00044	-1	J01EE Combinations of sulfonamides and trimethoprim, incl. derivatives	0.00111
p6m	C	J01FA	1129	42	360337	2199	1.3796	3.9731	2.86872	5.50271	1e-16	-1	J01FA Macrolides [DG:DG01551]	1.11e-15
p6m	C	J01FF	1166	5	362421	115	1.9739	7.1984	2.75302	18.822	5.7e-05	-1	J01FF Lincosamides [DG:DG01578]	0.000163
p6m	C	J01MA	1159	12	361845	691	1.2394	3.4537	1.92987	6.18076	3e-05	-1	J01MA Fluoroquinolones [DG:DG01549]	9.05e-05
p6m	C	J01XE	1096	75	357167	5369	1.3764	3.9607	3.10924	5.04536	7.5e-29	-1	J01XE Nitrofuran derivatives	1.56e-27
p6m	C	J02AC	1160	11	361952	584	1.6229	5.0676	2.75941	9.3065	1.7e-07	-1	J02AC Triazole derivatives	7.43e-07
p6m	C	J05AB	1157	14	361338	1198	1.2617	3.5315	2.066	6.03664	4e-06	-1	J05AB Nucleosides and nucleotides excl. reverse transcriptase inhibitors [DG:DG02840]	1.44e-05
p6m	C	L01BC	1166	5	362027	509	1.1943	3.3012	1.3613	8.00576	0.0082	-1	L01BC Pyrimidine analogues	0.0151
p6m	C	L02AE	1162	9	361625	911	0.7835	2.1891	1.11849	4.28432	0.022	-1	L02AE Gonadotropin releasing hormone analogues	0.0389
p6m	C	L02BG	1163	8	359889	2647	0.0742	1.077	0.533896	2.17247	0.84	0	L02BG Aromatase inhibitors [DG:DG01596]	0.855
p6m	C	L04AA	1166	5	362120	416	0.8712	2.3898	0.976221	5.85048	0.057	0	L04AA Selective immunosuppressants	0.0926
p6m	C	L04AX	1160	11	359527	3009	-0.1027	0.9024	0.496268	1.64077	0.74	0	L04AX Other immunosuppressants	0.798
p6m	C	M01AB	1164	7	361821	715	0.8994	2.4581	1.15837	5.21606	0.019	-1	M01AB Acetic acid derivatives and related substances	0.0343
p6m	C	M01AE	1128	43	354787	7749	0.4359	1.5464	1.13683	2.10351	0.0055	-1	M01AE Propionic acid derivatives	0.0104
p6m	C	M01AH	1165	6	361821	715	0.7827	2.1873	0.973859	4.91254	0.058	0	M01AH Coxibs	0.0926
p6m	C	M02AA	1097	74	355503	7033	0.7579	2.1339	1.67257	2.7224	1.1e-09	-1	M02AA Antiinflammatory preparations, non-steroids for topical use	5.89e-09
p6m	C	M03BX	1164	7	361953	583	0.7683	2.1561	1.0077	4.61306	0.048	-1	M03BX Other centrally acting agents	0.0797
p6m	C	M04AA	1124	47	355645	6891	0.105	1.1107	0.819632	1.5052	0.5	0	M04AA Preparations inhibiting uric acid production	0.585
p6m	C	M04AC	1161	10	361782	754	0.8285	2.2899	1.21022	4.33273	0.011	-1	M04AC Preparations with no effect on uric acid metabolism	0.0201
p6m	C	M05BA	1126	45	353781	8755	0.4823	1.6199	1.19406	2.19754	0.0019	-1	M05BA Bisphosphonates [DG:DG01600]	0.00404
p6m	C	N01BB	1159	12	361896	640	1.2507	3.4929	1.94137	6.28448	3e-05	-1	N01BB Amides	9.05e-05
p6m	C	N02AA	1095	76	359527	3009	1.4902	4.4379	3.44155	5.72279	1.5e-30	-1	N02AA Natural opium alkaloids	3.56e-29
p6m	C	N02AB	1163	8	362147	389	1.0118	2.7505	1.34041	5.64406	0.0058	-1	N02AB Phenylpiperidine derivatives	0.0108
p6m	C	N02AE	1150	21	361326	1210	0.8997	2.4588	1.56495	3.86326	9.5e-05	-1	N02AE Oripavine derivatives	0.000267
p6m	C	N02AJ	1083	88	351572	10964	0.4924	1.6362	1.3065	2.04902	1.8e-05	-1	N02AJ Opioids in combination with non-opioid analgesics	5.75e-05
p6m	C	N02AX	1142	29	358732	3804	0.181	1.1985	0.819095	1.75352	0.35	0	N02AX Other opioids	0.43
p6m	C	N02BE	898	273	336761	25775	0.8866	2.4268	2.08898	2.81922	4.5e-31	-1	N02BE Anilides	1.25e-29
p6m	C	N02BG	1165	6	362288	248	1.3942	4.0319	1.76583	9.20586	0.00093	-1	N02BG Other analgesics and antipyretics	0.00221
p6m	C	N02CC	1165	6	360178	2358	-0.0923	0.9118	0.406374	2.0458	0.82	0	N02CC Selective serotonin (5HT1) agonists [DG:DG01943]	0.855
p6m	C	N03AF	1161	10	361467	1069	0.7172	2.0487	1.08638	3.86363	0.027	-1	N03AF Carboxamide derivatives	0.0467
p6m	C	N03AG	1164	7	361630	906	0.081	1.0844	0.501102	2.34678	0.84	0	N03AG Fatty acid derivatives	0.855
p6m	C	N03AX	1057	114	351655	10881	0.7173	2.0488	1.66714	2.51789	9.2e-12	-1	N03AX Other antiepileptics	6.64e-11
p6m	C	N04BA	1153	18	360671	1865	0.8037	2.2338	1.38919	3.59195	0.00091	-1	N04BA Dopa and dopa derivatives	0.00219
p6m	C	N04BC	1158	13	361320	1216	0.842	2.3209	1.32423	4.06781	0.0033	-1	N04BC Dopamine agonists	0.00652
p6m	C	N04BD	1165	6	362121	415	1.367	3.9238	1.72397	8.93047	0.0011	-1	N04BD Monoamine oxidase B inhibitors	0.0025
p6m	C	N05AB	1154	17	361087	1449	1.0119	2.7508	1.68693	4.48564	5e-05	-1	N05AB Phenothiazines with piperazine structure	0.000148
p6m	C	N05AD	1164	7	362438	98	2.5948	13.3936	6.00025	29.8967	2.4e-10	-1	N05AD Butyrophenone derivatives [DG:DG01940]	1.42e-09
p6m	C	N05AH	1163	8	361429	1107	0.1923	1.212	0.595542	2.46675	0.6	0	N05AH Diazepines, oxazepines and thiazepines	0.668
p6m	C	N05AX	1153	18	361961	575	1.3599	3.8958	2.33988	6.48641	1.7e-07	-1	N05AX Other antipsychotics	7.43e-07
p6m	C	N05BA	1131	40	360490	2046	1.4358	4.203	3.02399	5.84178	1.3e-17	-1	N05BA Benzodiazepine derivatives [DG:DG01914]	1.54e-16
p6m	C	N05CD	1143	28	361894	642	2.1245	8.3691	5.60267	12.5016	3.2e-25	-1	N05CD Benzodiazepine derivatives	4.83e-24
p6m	C	N05CF	1144	27	359894	2642	0.7438	2.1039	1.41931	3.1186	0.00021	-1	N05CF Benzodiazepine related drugs	0.000553
p6m	C	N06AA	1104	67	350540	11996	0.2252	1.2526	0.97101	1.6158	0.083	0	N06AA Non-selective monoamine reuptake inhibitors [DG:DG01730]	0.131
p6m	C	N06AB	1069	102	343798	18738	0.2382	1.2689	1.01727	1.58279	0.035	-1	N06AB Selective serotonin reuptake inhibitors	0.0593
p6m	C	N06AX	1095	76	355256	7280	0.6626	1.9399	1.50615	2.49862	2.9e-07	-1	N06AX Other antidepressants	1.2e-06
p6m	C	N06DA	1145	26	360967	1569	0.9044	2.4705	1.59126	3.8356	5.6e-05	-1	N06DA Anticholinesterases	0.000163
p6m	C	N06DX	1142	29	361765	771	1.7887	5.9818	3.91887	9.1307	1.1e-16	-1	N06DX Other anti-dementia drugs	1.14e-15
p6m	C	N07CA	1157	14	360688	1848	0.3911	1.4787	0.865737	2.52549	0.15	0	N07CA Antivertigo preparations	0.202
p6m	C	P01AB	1162	9	362119	417	1.6949	5.4458	2.78472	10.65	7.3e-07	-1	P01AB Nitroimidazole derivatives	2.82e-06
p6m	C	P01BA	1162	9	361312	1224	0.5433	1.7217	0.886381	3.34439	0.11	0	P01BA Aminoquinolines	0.159
p6m	C	P01BC	1147	24	359877	2659	0.3668	1.4431	0.951864	2.18782	0.084	0	P01BC Methanolquinolines	0.132
p6m	C	R01AD	1121	50	351589	10947	0.0958	1.1005	0.824812	1.46839	0.52	0	R01AD Corticosteroids	0.604
p6m	C	R03AC	1037	134	348570	13966	0.8126	2.2537	1.81772	2.79422	1.3e-13	-1	R03AC Selective beta-2-adrenoreceptor agonists	1.08e-12
p6m	C	R03AK	1097	74	350313	12223	0.2726	1.3133	1.00655	1.71357	0.045	-1	R03AK Adrenergics in combination with corticosteroids or other drugs, excl. anticholinergics	0.0755
p6m	C	R03AL	1148	23	360562	1974	0.6683	1.9509	1.25382	3.03565	0.0031	-1	R03AL Adrenergics in combination with anticholinergics incl. triple combinations with corticosteroids	0.0062
p6m	C	R03BA	1140	31	356418	6118	0.2959	1.3443	0.927401	1.94863	0.12	0	R03BA Glucocorticoids	0.169
p6m	C	R03BB	1145	26	358708	3828	0.1191	1.1265	0.742951	1.70815	0.57	0	R03BB Anticholinergics	0.644
p6m	C	R03DC	1163	8	360203	2333	-0.4763	0.6211	0.305203	1.26383	0.19	0	R03DC Leukotriene receptor antagonists	0.248
p6m	C	R05CB	1149	22	360245	2291	0.3841	1.4683	0.937358	2.29997	0.093	0	R05CB Mucolytics	0.144
p6m	C	R05DA	1124	47	358051	4485	0.8282	2.2892	1.69829	3.08575	5.4e-08	-1	R05DA Opium alkaloids and derivatives	2.56e-07
p6m	C	R06AB	1163	8	362044	492	1.132	3.1018	1.52334	6.31577	0.0018	-1	R06AB Substituted alkylamines	0.00388
p6m	C	R06AD	1163	8	362065	471	1.1206	3.0667	1.50694	6.24086	0.002	-1	R06AD Phenothiazine derivatives	0.00415
p6m	C	R06AE	1099	72	357701	4835	1.1396	3.1255	2.43422	4.0132	4.1e-19	-1	R06AE Piperazine derivatives	5.24e-18
p6m	C	R06AX	1137	34	356248	6288	0.2	1.2213	0.86146	1.73157	0.26	0	R06AX Other antihistamines for systemic use	0.329
p6m	C	S01AA	1152	19	361445	1091	1.3416	3.825	2.39726	6.10306	1.8e-08	-1	S01AA Antibiotics	8.79e-08
p6m	C	S01BA	1166	5	361909	627	0.5792	1.7845	0.734664	4.33472	0.2	0	S01BA Corticosteroids, plain	0.259
p6m	C	S01EC	1162	9	360222	2314	-0.1092	0.8966	0.463072	1.73593	0.75	0	S01EC Carbonic anhydrase inhibitors	0.803
p6m	C	S01ED	1163	8	359166	3370	-0.5123	0.5991	0.297824	1.20526	0.15	0	S01ED Beta blocking agents	0.202
p6m	C	S01EE	1153	18	356969	5567	-0.2694	0.7638	0.477754	1.22126	0.26	0	S01EE Prostaglandin analogues	0.329
p6m	C	S01GX	1161	10	361279	1257	0.4854	1.6249	0.862672	3.06056	0.13	0	S01GX Other antiallergics	0.18
p6m	C	S01XA	1112	59	350745	11791	0.1418	1.1523	0.880392	1.50827	0.3	0	S01XA Other ophthalmologicals	0.372
p6m	C	V03AE	1163	8	362450	86	2.059	7.8382	3.4204	17.9621	1.1e-06	-1	V03AE Drugs for treatment of hyperkalemia and hyperphosphatemia	4.15e-06
p6m	C	V06DC	1165	6	362404	132	1.479	4.3887	1.82538	10.5515	0.00095	-1	V06DC Carbohydrates	0.00222
p6m	C	V07AY	1119	52	358884	3652	0.6887	1.9912	1.46744	2.70196	9.7e-06	-1	V07AY Other non-therapeutic auxiliary products	3.22e-05
p6m	D	A02BA	141	6	359842	2694	1.0283	2.7963	1.19173	6.56127	0.018	-1	A02BA H2-receptor antagonists [DG:DG01481]	0.0312
p6m	D	A02BC	93	54	296958	65578	0.2882	1.334	0.932768	1.90778	0.11	0	A02BC Proton pump inhibitors [DG:DG01646]	0.145
p6m	D	A02BX	139	8	358240	4296	0.9607	2.6134	1.24881	5.46923	0.011	-1	A02BX Other drugs for peptic ulcer and gastro-oesophageal reflux disease (GORD)	0.0204
p6m	D	A03BB	131	16	361304	1232	3.1625	23.6288	13.5089	41.3298	1.5e-28	-1	A03BB Belladonna alkaloids, semisynthetic, quaternary ammonium compounds	2.92e-27
p6m	D	A03FA	140	7	361786	750	2.7798	16.1161	7.35409	35.3176	3.8e-12	-1	A03FA Propulsives [DG:DG01763]	2.47e-11
p6m	D	A06AA	136	11	360436	2100	1.6137	5.0213	2.63253	9.57761	9.7e-07	-1	A06AA Softeners, emollients	2.97e-06
p6m	D	A06AB	117	30	359855	2681	2.341	10.3915	6.60474	16.3493	4.3e-24	-1	A06AB Contact laxatives	6.71e-23
p6m	D	A06AD	112	35	354297	8239	1.7367	5.6787	3.80349	8.47847	2e-17	-1	A06AD Osmotically acting laxatives	1.95e-16
p6m	D	A07DA	141	6	360719	1817	1.3882	4.0075	1.70803	9.4026	0.0014	-1	A07DA Antipropulsives	0.00312
p6m	D	A10AB	133	14	357218	5318	1.01	2.7456	1.38672	5.43618	0.0037	-1	A10AB Insulins and analogues for injection, fast-acting	0.00802
p6m	D	A10AD	142	5	361418	1118	1.23	3.4212	1.3014	8.99377	0.013	-1	A10AD Insulins and analogues for injection, intermediate- or long-acting combined with fast-acting	0.023
p6m	D	A10AE	141	6	360802	1734	0.9741	2.6489	1.05458	6.65353	0.038	-1	A10AE Insulins and analogues for injection, long-acting	0.057
p6m	D	A10BA	134	13	346774	15762	-0.4024	0.6687	0.347549	1.28669	0.23	0	A10BA Biguanides [DG:DG01684]	0.289
p6m	D	A10BB	142	5	358108	4428	-0.217	0.8049	0.309727	2.09186	0.66	0	A10BB Sulfonylureas	0.725
p6m	D	A10BH	142	5	358403	4133	-0.1659	0.8471	0.326534	2.19769	0.73	0	A10BH Dipeptidyl peptidase 4 (DPP-4) inhibitors [DG:DG01601]	0.77
p6m	D	A11CC	139	8	359204	3332	1.0411	2.8324	1.32989	6.0325	0.0069	-1	A11CC Vitamin D and analogues	0.0142
p6m	D	A11DA	139	8	361510	1026	2.1257	8.3789	3.84771	18.2463	8.6e-08	-1	A11DA Vitamin B1, plain	3.16e-07
p6m	D	A12AX	127	20	340509	22027	0.4291	1.5358	0.938429	2.51353	0.088	0	A12AX Calcium, combinations with vitamin D and/or other drugs	0.122
p6m	D	B01AC	113	34	332780	29756	0.148	1.1596	0.760934	1.76702	0.49	0	B01AC Platelet aggregation inhibitors excl. heparin	0.562
p6m	D	B01AF	127	20	350204	12332	0.5553	1.7425	1.07073	2.83586	0.025	-1	B01AF Direct factor Xa inhibitors	0.0398
p6m	D	B03AA	131	16	358768	3768	1.4497	4.2616	2.44724	7.42125	3e-07	-1	B03AA Iron bivalent, oral preparations	9.75e-07
p6m	D	B03BA	141	6	358820	3716	0.7804	2.1824	0.952906	4.99814	0.065	0	B03BA Vitamin B12 (cyanocobalamin and analogues)	0.0939
p6m	D	B03BB	132	15	357781	4755	1.3819	3.9826	2.2897	6.92727	9.9e-07	-1	B03BB Folic acid and derivatives	2.97e-06
p6m	D	C01DA	139	8	357699	4837	0.1317	1.1408	0.52126	2.49652	0.74	0	C01DA Organic nitrates	0.77
p6m	D	C02CA	142	5	356552	5984	-0.3097	0.7337	0.295932	1.81882	0.5	0	C02CA Alpha-adrenoreceptor antagonists	0.565
p6m	D	C03AA	140	7	351906	10630	-0.1847	0.8314	0.383468	1.80241	0.64	0	C03AA Thiazides, plain [DG:DG01749]	0.713
p6m	D	C03BA	138	9	356926	5610	0.8878	2.4298	1.22266	4.82883	0.011	-1	C03BA Sulfonamides, plain	0.0204
p6m	D	C03CA	127	20	355361	7175	0.6956	2.0049	1.18928	3.37971	0.009	-1	C03CA Sulfonamides, plain	0.0175
p6m	D	C07AB	114	33	332675	29861	0.173	1.1889	0.777462	1.81793	0.42	0	C07AB Beta blocking agents, selective	0.504
p6m	D	C08CA	115	32	318062	44474	-0.0345	0.9661	0.64098	1.45601	0.87	0	C08CA Dihydropyridine derivatives [DG:DG01928]	0.87
p6m	D	C09AA	123	24	320272	42264	-0.3928	0.6752	0.428568	1.06368	0.09	0	C09AA ACE inhibitors, plain [DG:DG01501]	0.122
p6m	D	C09CA	131	16	338827	23709	-0.1991	0.8195	0.479808	1.39964	0.47	0	C09CA Angiotensin II receptor blockers, plain [DG:DG01495]	0.547
p6m	D	C10AA	85	62	269137	93399	-0.1904	0.8267	0.585001	1.16817	0.28	0	C10AA HMG CoA reductase inhibitors [DG:DG01660]	0.347
p6m	D	D01AC	132	15	359203	3333	1.8059	6.0854	3.46947	10.6736	3e-10	-1	D01AC Imidazole and triazole derivatives	1.46e-09
p6m	D	D02AX	119	28	354202	8334	1.5105	4.5291	2.9241	7.01495	1.3e-11	-1	D02AX Other emollients and protectives	7.24e-11
p6m	D	D07AC	141	6	358901	3635	0.9858	2.68	1.17349	6.12056	0.019	-1	D07AC Corticosteroids, potent (group III)	0.0322
p6m	D	G04BD	141	6	356002	6534	0.1244	1.1325	0.49148	2.60953	0.77	0	G04BD Urinary antispasmodics	0.78
p6m	D	G04BE	140	7	355881	6655	0.5781	1.7827	0.819285	3.879	0.14	0	G04BE Drugs used in erectile dysfunction	0.182
p6m	D	G04CA	142	5	361665	871	1.6849	5.3919	2.15308	13.503	0.00032	-1	G04CA Alpha-adrenoreceptor antagonists	0.00078
p6m	D	G04CB	142	5	356491	6045	-0.3825	0.6821	0.275348	1.68989	0.41	0	G04CB Testosterone-5-alpha reductase inhibitors	0.5
p6m	D	H02AB	125	22	356480	6056	1.8586	6.4151	3.96835	10.3703	3.3e-14	-1	H02AB Glucocorticoids	2.57e-13
p6m	D	H03AA	129	18	338961	23575	0.5045	1.6561	0.984648	2.78558	0.057	0	H03AA Thyroid hormones	0.0839
p6m	D	J01AA	128	19	359039	3497	2.2748	9.726	5.80828	16.2861	5.2e-18	-1	J01AA Tetracyclines [DG:DG01197]	6.76e-17
p6m	D	J01CA	119	28	358775	3761	2.5408	12.6899	8.20639	19.623	3.1e-30	-1	J01CA Penicillins with extended spectrum [DG:DG01780]	8.06e-29
p6m	D	J01CF	131	16	358883	3653	1.863	6.4433	3.7272	11.1385	2.5e-11	-1	J01CF Beta-lactamase resistant penicillins [DG:DG01779]	1.3e-10
p6m	D	J01CR	140	7	361192	1344	2.1235	8.3601	3.79212	18.4309	1.4e-07	-1	J01CR Combinations of penicillins, incl. beta-lactamase inhibitors	4.75e-07
p6m	D	J01EA	140	7	361090	1446	1.5846	4.8775	2.17595	10.9333	0.00012	-1	J01EA Trimethoprim and derivatives [DG:DG01581]	0.000312
p6m	D	J01FA	139	8	360337	2199	1.7397	5.6959	2.68865	12.0668	5.6e-06	-1	J01FA Macrolides [DG:DG01551]	1.56e-05
p6m	D	J01XE	129	18	357167	5369	1.8303	6.2355	3.71441	10.4677	4.4e-12	-1	J01XE Nitrofuran derivatives	2.64e-11
p6m	D	M01AE	140	7	354787	7749	0.8835	2.4193	1.12118	5.22049	0.024	-1	M01AE Propionic acid derivatives	0.039
p6m	D	M02AA	131	16	355503	7033	1.0291	2.7985	1.6374	4.78302	0.00017	-1	M02AA Antiinflammatory preparations, non-steroids for topical use	0.000428
p6m	D	M04AA	139	8	355645	6891	0.1235	1.1315	0.538646	2.37675	0.74	0	M04AA Preparations inhibiting uric acid production	0.77
p6m	D	M05BA	135	12	353781	8755	1.0067	2.7365	1.48553	5.04091	0.0012	-1	M05BA Bisphosphonates [DG:DG01600]	0.00275
p6m	D	N02AA	117	30	359527	3009	2.8143	16.6817	10.6621	26.0996	6.8e-35	-1	N02AA Natural opium alkaloids	2.65e-33
p6m	D	N02AE	137	10	361326	1210	2.0114	7.4735	3.76782	14.8239	8.6e-09	-1	N02AE Oripavine derivatives	3.35e-08
p6m	D	N02AJ	133	14	351572	10964	0.6294	1.8766	1.06507	3.3064	0.029	-1	N02AJ Opioids in combination with non-opioid analgesics	0.0452
p6m	D	N02BE	82	65	336761	25775	1.5386	4.6582	3.26897	6.6378	1.7e-17	-1	N02BE Anilides	1.89e-16
p6m	D	N03AX	119	28	351655	10881	1.393	4.0271	2.59592	6.2472	5e-10	-1	N03AX Other antiepileptics	2.29e-09
p6m	D	N04BA	141	6	360671	1865	1.2178	3.3797	1.45649	7.84259	0.0046	-1	N04BA Dopa and dopa derivatives	0.0097
p6m	D	N05AD	141	6	362438	98	3.9942	54.2805	20.8125	141.568	3.2e-16	-1	N05AD Butyrophenone derivatives [DG:DG01940]	2.77e-15
p6m	D	N05AX	140	7	361961	575	2.2044	9.065	3.72199	22.0781	1.2e-06	-1	N05AX Other antipsychotics	3.47e-06
p6m	D	N05BA	134	13	360490	2046	2.3405	10.3861	5.6559	19.0722	4.4e-14	-1	N05BA Benzodiazepine derivatives [DG:DG01914]	3.12e-13
p6m	D	N05CD	125	22	361894	642	3.7164	41.1147	24.7743	68.2329	7e-47	-1	N05CD Benzodiazepine derivatives	5.46e-45
p6m	D	N06AA	141	6	350540	11996	-0.134	0.8746	0.381398	2.00543	0.75	0	N06AA Non-selective monoamine reuptake inhibitors [DG:DG01730]	0.77
p6m	D	N06AB	131	16	343798	18738	0.6159	1.8513	1.05407	3.25163	0.032	-1	N06AB Selective serotonin reuptake inhibitors	0.0489
p6m	D	N06AX	134	13	355256	7280	0.8437	2.325	1.24952	4.32597	0.0077	-1	N06AX Other antidepressants	0.0154
p6m	D	N06DA	138	9	360967	1569	0.6939	2.0015	0.894271	4.47973	0.091	0	N06DA Anticholinesterases	0.122
p6m	D	N06DX	134	13	361765	771	2.1156	8.2947	4.18175	16.4528	1.4e-09	-1	N06DX Other anti-dementia drugs	6.07e-09
p6m	D	R01AD	142	5	351589	10947	-0.1748	0.8396	0.341078	2.06675	0.7	0	R01AD Corticosteroids	0.758
p6m	D	R03AC	129	18	348570	13966	1.0004	2.7195	1.49188	4.95716	0.0011	-1	R03AC Selective beta-2-adrenoreceptor agonists	0.0026
p6m	D	R03AK	138	9	350313	12223	0.5214	1.6845	0.779497	3.64005	0.18	0	R03AK Adrenergics in combination with corticosteroids or other drugs, excl. anticholinergics	0.23
p6m	D	R03AL	142	5	360562	1974	0.882	2.4157	0.917427	6.36059	0.074	0	R03AL Adrenergics in combination with anticholinergics incl. triple combinations with corticosteroids	0.105
p6m	D	R05CB	141	6	360245	2291	1.0458	2.8457	1.16842	6.93086	0.021	-1	R05CB Mucolytics	0.0349
p6m	D	R05DA	139	8	358051	4485	0.9319	2.5393	1.22635	5.25802	0.012	-1	R05DA Opium alkaloids and derivatives	0.0218
p6m	D	R06AE	133	14	357701	4835	1.5659	4.787	2.69653	8.49794	8.9e-08	-1	R06AE Piperazine derivatives	3.16e-07
p6m	D	S01AA	139	8	361445	1091	2.2839	9.8146	4.61474	20.8735	3e-09	-1	S01AA Antibiotics	1.23e-08
p6m	D	S01XA	137	10	350745	11791	0.2427	1.2746	0.661505	2.45608	0.47	0	S01XA Other ophthalmologicals	0.547
p6m	D	V07AY	135	12	358884	3652	1.34	3.8191	1.95593	7.45692	8.7e-05	-1	V07AY Other non-therapeutic auxiliary products	0.000234
p6m	E	A01AB	3423	55	360379	2157	0.859	2.3607	1.79665	3.10184	7e-10	-1	A01AB Antiinfectives and antiseptics for local oral treatment	4.6e-09
p6m	E	A01AD	3462	16	362037	499	1.0285	2.797	1.68166	4.65197	7.4e-05	-1	A01AD Other agents for local oral treatment	0.000243
p6m	E	A02BA	3435	43	359842	2694	0.3144	1.3695	1.00664	1.86303	0.045	-1	A02BA H2-receptor antagonists [DG:DG01481]	0.0806
p6m	E	A02BC	2602	876	296958	65578	0.3352	1.3982	1.28623	1.51991	3.5e-15	-1	A02BC Proton pump inhibitors [DG:DG01646]	3.28e-14
p6m	E	A02BX	3387	91	358240	4296	0.6874	1.9885	1.60364	2.46569	3.8e-10	-1	A02BX Other drugs for peptic ulcer and gastro-oesophageal reflux disease (GORD)	2.67e-09
p6m	E	A03AA	3450	28	360580	1956	0.2537	1.2888	0.882738	1.88155	0.19	0	A03AA Synthetic anticholinergics, esters with tertiary amino group	0.262
p6m	E	A03AX	3465	13	361747	789	0.3513	1.4209	0.815586	2.47529	0.21	0	A03AX Other drugs for functional gastrointestinal disorders	0.281
p6m	E	A03BB	3431	47	361304	1232	1.1277	3.0884	2.28386	4.17646	2.4e-13	-1	A03BB Belladonna alkaloids, semisynthetic, quaternary ammonium compounds	2.15e-12
p6m	E	A03FA	3455	23	361786	750	0.8807	2.4126	1.57779	3.68911	4.8e-05	-1	A03FA Propulsives [DG:DG01763]	0.000166
p6m	E	A04AA	3472	6	362390	146	1.3037	3.6828	1.61405	8.40292	0.0019	-1	A04AA Serotonin (5HT3) antagonists	0.0048
p6m	E	A05AA	3471	7	362175	361	0.7061	2.0261	0.956019	4.29388	0.065	0	A05AA Bile acid and derivatives [DG:DG01956]	0.109
p6m	E	A06AA	3402	76	360436	2100	1.0918	2.9796	2.34502	3.78582	4.1e-19	-1	A06AA Softeners, emollients	5.77e-18
p6m	E	A06AB	3357	121	359855	2681	1.2245	3.4023	2.79464	4.14207	3.2e-34	-1	A06AB Contact laxatives	1.26e-32
p6m	E	A06AC	3467	11	361235	1301	-0.0564	0.9452	0.520476	1.71643	0.85	0	A06AC Bulk-forming laxatives	0.872
p6m	E	A06AD	3262	216	354297	8239	0.9768	2.6558	2.29662	3.07123	1.2e-39	-1	A06AD Osmotically acting laxatives	5.91e-38
p6m	E	A06AG	3469	9	362424	112	1.8672	6.4699	3.18868	13.1275	2.3e-07	-1	A06AG Enemas	1.01e-06
p6m	E	A06AX	3471	7	362122	414	0.4096	1.5063	0.707239	3.2081	0.29	0	A06AX Other drugs for constipation	0.369
p6m	E	A07AA	3454	24	361897	639	1.1907	3.2892	2.16964	4.98658	2e-08	-1	A07AA Antibiotics	1.06e-07
p6m	E	A07DA	3429	49	360719	1817	0.872	2.3917	1.78463	3.20531	5.3e-09	-1	A07DA Antipropulsives	3.07e-08
p6m	E	A07EC	3447	31	360116	2420	0.1688	1.1839	0.827466	1.69396	0.36	0	A07EC Aminosalicylic acid and similar agents	0.443
p6m	E	A08AB	3470	8	362370	166	0.9652	2.6254	1.28007	5.38469	0.0084	-1	A08AB Peripherally acting antiobesity products	0.0176
p6m	E	A09AB	3473	5	362506	30	2.6739	14.4959	5.50101	38.1987	6.4e-08	-1	A09AB Acid preparations	3.12e-07
p6m	E	A10AB	3372	106	357218	5318	0.2533	1.2883	1.03223	1.60796	0.025	-1	A10AB Insulins and analogues for injection, fast-acting	0.0488
p6m	E	A10AC	3461	17	361852	684	0.3769	1.4578	0.887819	2.39371	0.14	0	A10AC Insulins and analogues for injection, intermediate-acting	0.2
p6m	E	A10AD	3446	32	361418	1118	0.5193	1.6809	1.16228	2.43092	0.0058	-1	A10AD Insulins and analogues for injection, intermediate- or long-acting combined with fast-acting	0.013
p6m	E	A10AE	3452	26	360802	1734	-0.1713	0.8425	0.562577	1.26181	0.41	0	A10AE Insulins and analogues for injection, long-acting	0.492
p6m	E	A10BA	3237	241	346774	15762	0.0666	1.0689	0.911376	1.25361	0.41	0	A10BA Biguanides [DG:DG01684]	0.492
p6m	E	A10BB	3404	74	358108	4428	0.0824	1.0859	0.844526	1.39637	0.52	0	A10BB Sulfonylureas	0.589
p6m	E	A10BD	3472	6	362286	250	0.2874	1.3329	0.58667	3.02852	0.49	0	A10BD Combinations of oral blood glucose lowering drugs	0.571
p6m	E	A10BG	3470	8	362010	526	0.021	1.0213	0.503817	2.07011	0.95	0	A10BG Thiazolidinediones [DG:DG01683]	0.95
p6m	E	A10BH	3408	70	358403	4133	0.117	1.1242	0.870926	1.45103	0.37	0	A10BH Dipeptidyl peptidase 4 (DPP-4) inhibitors [DG:DG01601]	0.453
p6m	E	A10BJ	3455	23	361280	1256	-0.11	0.8958	0.584345	1.37333	0.61	0	A10BJ Glucagon-like peptide-1 receptor (GLP-1) analogues	0.668
p6m	E	A10BK	3430	48	359983	2553	0.0739	1.0767	0.796135	1.45606	0.63	0	A10BK Sodium-glucose co-transporter 2 (SGLT2) inhibitors	0.686
p6m	E	A11CC	3403	75	359204	3332	0.6088	1.8383	1.44732	2.33492	6e-07	-1	A11CC Vitamin D and analogues	2.46e-06
p6m	E	A11DA	3445	33	361510	1026	0.7561	2.1299	1.48261	3.05971	4.3e-05	-1	A11DA Vitamin B1, plain	0.000151
p6m	E	A11EX	3471	7	362012	524	-0.2127	0.8084	0.377029	1.73329	0.58	0	A11EX Vitamin B-complex, other combinations	0.638
p6m	E	A12AA	3470	8	362098	438	0.5595	1.7498	0.864867	3.5401	0.12	0	A12AA Calcium	0.176
p6m	E	A12AX	3224	254	340509	22027	0.2511	1.2854	1.12474	1.46901	0.00023	-1	A12AX Calcium, combinations with vitamin D and/or other drugs	0.000687
p6m	E	B01AA	3426	52	358702	3834	0.2298	1.2584	0.950082	1.66666	0.11	0	B01AA Vitamin K antagonists	0.164
p6m	E	B01AB	3467	11	362332	204	1.5847	4.8781	2.62589	9.0619	5.3e-07	-1	B01AB Heparin group	2.22e-06
p6m	E	B01AC	3083	395	332780	29756	0.1971	1.2178	1.07878	1.37484	0.0014	-1	B01AC Platelet aggregation inhibitors excl. heparin	0.00363
p6m	E	B01AE	3470	8	361960	576	0.4208	1.5232	0.754853	3.07354	0.24	0	B01AE Direct thrombin inhibitors	0.311
p6m	E	B01AF	3294	184	350204	12332	0.4753	1.6085	1.378	1.8776	1.7e-09	-1	B01AF Direct factor Xa inhibitors	1.08e-08
p6m	E	B03AA	3377	101	358768	3768	0.732	2.0792	1.68729	2.56211	6.5e-12	-1	B03AA Iron bivalent, oral preparations	5.12e-11
p6m	E	B03BA	3397	81	358820	3716	0.6409	1.8982	1.51219	2.38288	3.3e-08	-1	B03BA Vitamin B12 (cyanocobalamin and analogues)	1.71e-07
p6m	E	B03BB	3367	111	357781	4755	0.7105	2.035	1.67127	2.4779	1.5e-12	-1	B03BB Folic acid and derivatives	1.28e-11
p6m	E	B05CB	3467	11	362377	159	1.8229	6.1895	3.313	11.5636	1.1e-08	-1	B05CB Salt solutions	6.02e-08
p6m	E	B05XA	3472	6	362210	326	0.112	1.1185	0.490466	2.55068	0.79	0	B05XA Electrolyte solutions	0.832
p6m	E	C01AA	3447	31	360866	1670	0.5196	1.6814	1.16927	2.41791	0.005	-1	C01AA Digitalis glycosides [DG:DG01697]	0.0113
p6m	E	C01BD	3470	8	362097	439	0.3661	1.442	0.700553	2.96835	0.32	0	C01BD Antiarrhythmics, class III [DG:DG01648]	0.402
p6m	E	C01CA	3471	7	362159	377	0.6476	1.9109	0.900101	4.05691	0.092	0	C01CA Adrenergic and dopaminergic agents	0.146
p6m	E	C01DA	3370	108	357699	4837	0.5115	1.6678	1.34674	2.0654	2.7e-06	-1	C01DA Organic nitrates	1.04e-05
p6m	E	C01DX	3464	14	361466	1070	-0.2525	0.7769	0.451715	1.33611	0.36	0	C01DX Other vasodilators used in cardiac diseases	0.443
p6m	E	C01EB	3458	20	361729	807	0.4316	1.5396	0.974478	2.43258	0.064	0	C01EB Other cardiac preparations	0.109
p6m	E	C02CA	3408	70	356552	5984	-0.0406	0.9603	0.752482	1.22539	0.74	0	C02CA Alpha-adrenoreceptor antagonists	0.792
p6m	E	C03AA	3379	99	351906	10630	-0.0614	0.9404	0.765035	1.15598	0.56	0	C03AA Thiazides, plain [DG:DG01749]	0.627
p6m	E	C03BA	3417	61	356926	5610	0.0158	1.0159	0.785081	1.31453	0.91	0	C03BA Sulfonamides, plain	0.924
p6m	E	C03CA	3323	155	355361	7175	0.5689	1.7664	1.48226	2.10499	2e-10	-1	C03CA Sulfonamides, plain	1.46e-09
p6m	E	C03DA	3437	41	360011	2525	0.2237	1.2507	0.909838	1.71937	0.17	0	C03DA Aldosterone antagonists	0.236
p6m	E	C03EB	3473	5	362299	237	0.6275	1.873	0.768323	4.5659	0.17	0	C03EB High-ceiling diuretics and potassium-sparing agents	0.236
p6m	E	C05AX	3451	27	361397	1139	0.7999	2.2253	1.51097	3.27739	5.1e-05	-1	C05AX Other agents for treatment of hemorrhoids and anal fissures for topical use	0.000173
p6m	E	C07AA	3449	29	359854	2682	0.046	1.0471	0.723884	1.5145	0.81	0	C07AA Beta blocking agents, non-selective	0.849
p6m	E	C07AB	3135	343	332675	29861	0.0422	1.0431	0.920538	1.18192	0.51	0	C07AB Beta blocking agents, selective	0.584
p6m	E	C07AG	3465	13	362141	395	0.8818	2.4153	1.37514	4.24235	0.0022	-1	C07AG Alpha and beta blocking agents	0.00542
p6m	E	C08CA	2980	498	318062	44474	0.1168	1.1239	1.0145	1.24511	0.025	-1	C08CA Dihydropyridine derivatives [DG:DG01928]	0.0488
p6m	E	C08DA	3469	9	361982	554	0.4099	1.5067	0.774887	2.92953	0.23	0	C08DA Phenylalkylamine derivatives	0.302
p6m	E	C08DB	3455	23	359990	2546	-0.3185	0.7273	0.478999	1.10419	0.14	0	C08DB Benzothiazepine derivatives	0.2
p6m	E	C09AA	3035	443	320272	42264	-0.0747	0.928	0.833176	1.0336	0.17	0	C09AA ACE inhibitors, plain [DG:DG01501]	0.236
p6m	E	C09CA	3223	255	338827	23709	-0.0133	0.9868	0.86254	1.12894	0.85	0	C09CA Angiotensin II receptor blockers, plain [DG:DG01495]	0.872
p6m	E	C09DX	3470	8	362234	302	0.6517	1.9188	0.942073	3.90836	0.073	0	C09DX Angiotensin II receptor blockers (ARBs), other combinations	0.12
p6m	E	C10AA	2470	1008	269137	93399	0.101	1.1063	1.01783	1.20249	0.018	-1	C10AA HMG CoA reductase inhibitors [DG:DG01660]	0.0366
p6m	E	C10AB	3465	13	361376	1160	-0.1554	0.8561	0.493013	1.48653	0.58	0	C10AB Fibrates	0.638
p6m	E	C10AC	3470	8	362130	406	0.5886	1.8015	0.891455	3.64059	0.1	0	C10AC Bile acid sequestrants	0.153
p6m	E	C10AX	3442	36	359644	2892	0.0458	1.0468	0.748442	1.4642	0.79	0	C10AX Other lipid modifying agents	0.832
p6m	E	D01AC	3383	95	359203	3333	0.9168	2.5012	2.02502	3.08931	1.8e-17	-1	D01AC Imidazole and triazole derivatives	2.09e-16
p6m	E	D01AE	3466	12	361912	624	0.5977	1.8179	1.02066	3.23786	0.042	-1	D01AE Other antifungals for topical use	0.0759
p6m	E	D01BA	3469	9	362113	423	0.7132	2.0406	1.05064	3.96332	0.035	-1	D01BA Antifungals for systemic use	0.065
p6m	E	D02AC	3437	41	359662	2874	0.3476	1.4157	1.03429	1.93784	0.03	-1	D02AC Soft paraffin and fat products	0.0574
p6m	E	D02AE	3463	15	361823	713	0.6669	1.9482	1.16169	3.26711	0.011	-1	D02AE Carbamide products	0.0228
p6m	E	D02AX	3281	197	354202	8334	0.7895	2.2023	1.89476	2.55983	8.1e-25	-1	D02AX Other emollients and protectives	1.33e-23
p6m	E	D05AX	3460	18	361388	1148	0.3566	1.4285	0.892347	2.28679	0.14	0	D05AX Other antipsoriatics for topical use	0.2
p6m	E	D06AX	3459	19	361760	776	0.7502	2.1174	1.32471	3.38432	0.0017	-1	D06AX Other antibiotics for topical use	0.00435
p6m	E	D06BX	3472	6	362049	487	0.1908	1.2102	0.537042	2.72714	0.65	0	D06BX Other chemotherapeutics	0.7
p6m	E	D07AA	3453	25	361361	1175	0.7696	2.1588	1.44411	3.22721	0.00018	-1	D07AA Corticosteroids, weak (group I)	0.000546
p6m	E	D07AB	3453	25	361386	1150	0.7707	2.1614	1.44644	3.22963	0.00017	-1	D07AB Corticosteroids, moderately potent (group II)	0.000523
p6m	E	D07AC	3407	71	358901	3635	0.6608	1.9363	1.5238	2.46052	6.5e-08	-1	D07AC Corticosteroids, potent (group III)	3.12e-07
p6m	E	D07AD	3457	21	361270	1266	0.5188	1.68	1.08711	2.59613	0.019	-1	D07AD Corticosteroids, very potent (group IV)	0.0378
p6m	E	D07CA	3465	13	362094	442	1.045	2.8434	1.62898	4.96313	0.00024	-1	D07CA Corticosteroids, weak, combinations with antibiotics	0.000695
p6m	E	D07CC	3446	32	361609	927	1.1413	3.1308	2.18561	4.48475	4.8e-10	-1	D07CC Corticosteroids, potent, combinations with antibiotics	3.26e-09
p6m	E	D07CD	3469	9	362288	248	1.195	3.3035	1.68833	6.46374	0.00048	-1	D07CD Corticosteroids, very potent, combinations with antibiotics	0.0013
p6m	E	D09AA	3469	9	362384	152	1.5511	4.7167	2.37343	9.37338	9.6e-06	-1	D09AA Medicated dressings with antiinfectives	3.64e-05
p6m	E	D11AC	3466	12	361972	564	0.6029	1.8274	1.02643	3.25349	0.041	-1	D11AC Medicated shampoos	0.0755
p6m	E	G01AF	3462	16	361938	598	0.7794	2.1801	1.31527	3.61348	0.0025	-1	G01AF Imidazole derivatives	0.00601
p6m	E	G03AC	3473	5	362287	249	0.3512	1.4207	0.583528	3.45904	0.44	0	G03AC Progestogens	0.522
p6m	E	G03BA	3463	15	361861	675	0.5186	1.6797	0.999348	2.82327	0.05	0	G03BA 3-oxoandrosten (4) derivatives	0.0879
p6m	E	G03CA	3376	102	353542	8994	0.2411	1.2726	1.0396	1.55788	0.019	-1	G03CA Natural and semisynthetic estrogens, plain	0.0378
p6m	E	G03DA	3469	9	362003	533	0.4229	1.5264	0.786945	2.96051	0.21	0	G03DA Pregnen (4) derivatives	0.281
p6m	E	G03FA	3471	7	362137	399	0.4888	1.6304	0.769711	3.45337	0.2	0	G03FA Progestogens and estrogens, fixed combinations	0.274
p6m	E	G03FB	3462	16	361970	566	0.9397	2.5592	1.55001	4.2253	0.00024	-1	G03FB Progestogens and estrogens, sequential preparations	0.000695
p6m	E	G04BD	3394	84	356002	6534	0.1857	1.2041	0.964873	1.50252	0.1	0	G04BD Urinary antispasmodics	0.153
p6m	E	G04BE	3376	102	355881	6655	0.3188	1.3755	1.12233	1.68569	0.0021	-1	G04BE Drugs used in erectile dysfunction	0.00524
p6m	E	G04CA	3465	13	361665	871	0.3304	1.3916	0.798791	2.42432	0.24	0	G04CA Alpha-adrenoreceptor antagonists	0.311
p6m	E	G04CB	3416	62	356491	6045	0.0802	1.0835	0.837069	1.40236	0.54	0	G04CB Testosterone-5-alpha reductase inhibitors	0.608
p6m	E	H02AA	3470	8	362208	328	0.7707	2.1613	1.05359	4.43358	0.035	-1	H02AA Mineralocorticoids	0.065
p6m	E	H02AB	3317	161	356480	6056	0.9764	2.6548	2.24728	3.1363	1.6e-30	-1	H02AB Glucocorticoids	4.5e-29
p6m	E	H03AA	3246	232	338961	23575	0.0043	1.0043	0.875271	1.15238	0.95	0	H03AA Thyroid hormones	0.95
p6m	E	J01AA	3316	162	359039	3497	1.4638	4.3222	3.65801	5.10696	2.9e-66	-1	J01AA Tetracyclines [DG:DG01197]	2.86e-64
p6m	E	J01CA	3265	213	358775	3761	1.7273	5.6253	4.85462	6.51835	8.1e-117	-1	J01CA Penicillins with extended spectrum [DG:DG01780]	1.6e-114
p6m	E	J01CE	3463	15	361666	870	0.4717	1.6028	0.958728	2.67945	0.072	0	J01CE Beta-lactamase sensitive penicillins [DG:DG01778]	0.119
p6m	E	J01CF	3366	112	358883	3653	1.0711	2.9185	2.40292	3.54477	3.5e-27	-1	J01CF Beta-lactamase resistant penicillins [DG:DG01779]	6.89e-26
p6m	E	J01CR	3426	52	361192	1344	1.2727	3.5703	2.68699	4.744	1.7e-18	-1	J01CR Combinations of penicillins, incl. beta-lactamase inhibitors	2.09e-17
p6m	E	J01DB	3461	17	361676	860	0.6624	1.9394	1.19383	3.15076	0.0075	-1	J01DB First-generation cephalosporins [DG:DG01774]	0.0161
p6m	E	J01EA	3433	45	361090	1446	1.0614	2.8905	2.13024	3.92213	9.3e-12	-1	J01EA Trimethoprim and derivatives [DG:DG01581]	7.05e-11
p6m	E	J01EE	3471	7	362349	187	1.1298	3.095	1.4356	6.67228	0.004	-1	J01EE Combinations of sulfonamides and trimethoprim, incl. derivatives	0.00938
p6m	E	J01FA	3408	70	360337	2199	1.0187	2.7697	2.16198	3.54832	7.6e-16	-1	J01FA Macrolides [DG:DG01551]	7.49e-15
p6m	E	J01FF	3472	6	362421	115	1.4241	4.154	1.7778	9.70636	0.001	-1	J01FF Lincosamides [DG:DG01578]	0.00263
p6m	E	J01MA	3459	19	361845	691	0.9375	2.5537	1.61136	4.04703	6.6e-05	-1	J01MA Fluoroquinolones [DG:DG01549]	0.00022
p6m	E	J01XE	3343	135	357167	5369	0.9993	2.7163	2.27449	3.24389	2.6e-28	-1	J01XE Nitrofuran derivatives	5.69e-27
p6m	E	J02AC	3459	19	361952	584	1.1195	3.0634	1.92667	4.87072	2.2e-06	-1	J02AC Triazole derivatives	8.67e-06
p6m	E	J05AB	3446	32	361338	1198	0.9792	2.6624	1.86504	3.80061	7e-08	-1	J05AB Nucleosides and nucleotides excl. reverse transcriptase inhibitors [DG:DG02840]	3.28e-07
p6m	E	L01BC	3471	7	362027	509	0.6047	1.8307	0.866469	3.86798	0.11	0	L01BC Pyrimidine analogues	0.164
p6m	E	L02AE	3467	11	361625	911	0.3328	1.3949	0.76478	2.54422	0.28	0	L02AE Gonadotropin releasing hormone analogues	0.361
p6m	E	L02BA	3472	6	361843	693	-0.0827	0.9206	0.411236	2.06109	0.84	0	L02BA Anti-estrogens	0.871
p6m	E	L02BG	3449	29	359889	2647	0.2641	1.3022	0.898889	1.88654	0.16	0	L02BG Aromatase inhibitors [DG:DG01596]	0.227
p6m	E	L04AA	3472	6	362120	416	0.193	1.2129	0.53841	2.7324	0.64	0	L04AA Selective immunosuppressants	0.693
p6m	E	L04AX	3444	34	359527	3009	0.1174	1.1246	0.799186	1.58258	0.5	0	L04AX Other immunosuppressants	0.579
p6m	E	M01AB	3462	16	361821	715	0.7293	2.0737	1.25886	3.41605	0.0042	-1	M01AB Acetic acid derivatives and related substances	0.00962
p6m	E	M01AE	3363	115	354787	7749	0.3463	1.4138	1.17072	1.70746	0.00032	-1	M01AE Propionic acid derivatives	0.000914
p6m	E	M01AH	3466	12	361821	715	0.4372	1.5483	0.871984	2.7493	0.14	0	M01AH Coxibs	0.2
p6m	E	M02AA	3330	148	355503	7033	0.7192	2.0527	1.73044	2.43506	1.6e-16	-1	M02AA Antiinflammatory preparations, non-steroids for topical use	1.75e-15
p6m	E	M03BX	3468	10	361953	583	0.2532	1.2881	0.684193	2.4252	0.43	0	M03BX Other centrally acting agents	0.513
p6m	E	M04AA	3366	112	355645	6891	0.3049	1.3565	1.11466	1.65074	0.0023	-1	M04AA Preparations inhibiting uric acid production	0.00559
p6m	E	M04AC	3458	20	361782	754	0.8114	2.251	1.43318	3.53538	0.00043	-1	M04AC Preparations with no effect on uric acid metabolism	0.00118
p6m	E	M05BA	3392	86	353781	8755	0.2139	1.2385	0.995365	1.54108	0.055	0	M05BA Bisphosphonates [DG:DG01600]	0.0942
p6m	E	M05BX	3473	5	362227	309	0.7367	2.089	0.856765	5.09337	0.1	0	M05BX Other drugs affecting bone structure and mineralization	0.153
p6m	E	N01BB	3460	18	361896	640	0.8722	2.3922	1.4843	3.85555	0.00034	-1	N01BB Amides	0.000957
p6m	E	N01BX	3473	5	362234	302	0.2935	1.3411	0.550753	3.26546	0.52	0	N01BX Other local anesthetics	0.589
p6m	E	N02AA	3375	103	359527	3009	0.9515	2.5895	2.09935	3.19415	6.3e-19	-1	N02AA Natural opium alkaloids	8.27e-18
p6m	E	N02AB	3467	11	362147	389	0.6324	1.8821	1.02429	3.45831	0.042	-1	N02AB Phenylpiperidine derivatives	0.0759
p6m	E	N02AE	3442	36	361326	1210	0.7654	2.1499	1.52495	3.03086	1.3e-05	-1	N02AE Oripavine derivatives	4.74e-05
p6m	E	N02AJ	3285	193	351572	10964	0.4511	1.57	1.35037	1.82542	4.5e-09	-1	N02AJ Opioids in combination with non-opioid analgesics	2.77e-08
p6m	E	N02AX	3421	57	358732	3804	0.0757	1.0786	0.823482	1.41278	0.58	0	N02AX Other opioids	0.638
p6m	E	N02BE	2950	528	336761	25775	0.7229	2.0605	1.8601	2.28248	1.3e-43	-1	N02BE Anilides	8.54e-42
p6m	E	N02BG	3471	7	362288	248	0.7031	2.02	0.945705	4.31463	0.069	0	N02BG Other analgesics and antipyretics	0.115
p6m	E	N02CC	3441	37	360178	2358	0.4186	1.5199	1.09289	2.11365	0.013	-1	N02CC Selective serotonin (5HT1) agonists [DG:DG01943]	0.0267
p6m	E	N02CX	3470	8	361976	560	0.0989	1.104	0.543296	2.24327	0.79	0	N02CX Other antimigraine preparations	0.832
p6m	E	N03AB	3470	8	362197	339	0.7102	2.0344	0.99455	4.16128	0.052	0	N03AB Hydantoin derivatives	0.0907
p6m	E	N03AE	3467	11	362080	456	0.5416	1.7187	0.928675	3.18089	0.085	0	N03AE Benzodiazepine derivatives	0.138
p6m	E	N03AF	3463	15	361467	1069	0.1718	1.1874	0.709531	1.98711	0.51	0	N03AF Carboxamide derivatives	0.584
p6m	E	N03AG	3461	17	361630	906	0.1858	1.2041	0.73388	1.97574	0.46	0	N03AG Fatty acid derivatives	0.543
p6m	E	N03AX	3295	183	351655	10881	0.2835	1.3278	1.13488	1.55359	0.0004	-1	N03AX Other antiepileptics	0.00111
p6m	E	N04BA	3449	29	360671	1865	0.5174	1.6777	1.15404	2.439	0.0067	-1	N04BA Dopa and dopa derivatives	0.0147
p6m	E	N04BC	3456	22	361320	1216	0.5752	1.7774	1.1585	2.72703	0.0084	-1	N04BC Dopamine agonists	0.0176
p6m	E	N04BD	3472	6	362121	415	0.5161	1.6755	0.74383	3.77429	0.21	0	N04BD Monoamine oxidase B inhibitors	0.281
p6m	E	N05AB	3452	26	361087	1449	0.5752	1.7774	1.19907	2.63469	0.0042	-1	N05AB Phenothiazines with piperazine structure	0.00962
p6m	E	N05AD	3470	8	362438	98	1.9679	7.1554	3.40528	15.0356	2.1e-07	-1	N05AD Butyrophenone derivatives [DG:DG01940]	9.62e-07
p6m	E	N05AH	3455	23	361429	1107	0.3406	1.4058	0.921275	2.14529	0.11	0	N05AH Diazepines, oxazepines and thiazepines	0.164
p6m	E	N05AN	3473	5	362095	441	-0.0755	0.9272	0.381416	2.25414	0.87	0	N05AN Lithium	0.888
p6m	E	N05AX	3449	29	361961	575	0.9908	2.6933	1.81073	4.00614	1e-06	-1	N05AX Other antipsychotics	4.02e-06
p6m	E	N05BA	3396	82	360490	2046	1.2288	3.4171	2.71353	4.30305	1.5e-25	-1	N05BA Benzodiazepine derivatives [DG:DG01914]	2.69e-24
p6m	E	N05CD	3436	42	361894	642	1.8452	6.3295	4.56711	8.77188	1.5e-28	-1	N05CD Benzodiazepine derivatives	3.69e-27
p6m	E	N05CF	3419	59	359894	2642	0.7025	2.0187	1.54774	2.63299	2.2e-07	-1	N05CF Benzodiazepine related drugs	9.85e-07
p6m	E	N06AA	3313	165	350540	11996	0.2231	1.2499	1.06302	1.46966	0.0069	-1	N06AA Non-selective monoamine reuptake inhibitors [DG:DG01730]	0.0149
p6m	E	N06AB	3192	286	343798	18738	0.2562	1.292	1.1326	1.47394	0.00014	-1	N06AB Selective serotonin reuptake inhibitors	0.000445
p6m	E	N06AX	3326	152	355256	7280	0.4569	1.5792	1.32563	1.88138	3.1e-07	-1	N06AX Other antidepressants	1.33e-06
p6m	E	N06DA	3421	57	360967	1569	1.0701	2.9156	2.1567	3.94153	3.5e-12	-1	N06DA Anticholinesterases	2.87e-11
p6m	E	N06DX	3418	60	361765	771	1.8519	6.3722	4.70248	8.63475	6.8e-33	-1	N06DX Other anti-dementia drugs	2.23e-31
p6m	E	N07CA	3445	33	360688	1848	0.4913	1.6345	1.15178	2.31958	0.0059	-1	N07CA Antivertigo preparations	0.0131
p6m	E	P01AB	3460	18	362119	417	1.4132	4.1091	2.5506	6.61994	6.3e-09	-1	P01AB Nitroimidazole derivatives	3.55e-08
p6m	E	P01BA	3461	17	361312	1224	0.2599	1.2968	0.800283	2.10143	0.29	0	P01BA Aminoquinolines	0.369
p6m	E	P01BC	3437	41	359877	2659	0.2695	1.3093	0.954143	1.79656	0.095	0	P01BC Methanolquinolines	0.149
p6m	E	R01AC	3472	6	362243	293	0.7078	2.0295	0.901546	4.5687	0.087	0	R01AC Antiallergic agents, excl. corticosteroids	0.139
p6m	E	R01AD	3336	142	351589	10947	0.2528	1.2877	1.08442	1.52899	0.0039	-1	R01AD Corticosteroids	0.00926
p6m	E	R03AC	3191	287	348570	13966	0.6513	1.918	1.66596	2.20817	1.3e-19	-1	R03AC Selective beta-2-adrenoreceptor agonists	1.97e-18
p6m	E	R03AK	3293	185	350313	12223	0.2904	1.3369	1.13197	1.57898	0.00063	-1	R03AK Adrenergics in combination with corticosteroids or other drugs, excl. anticholinergics	0.00168
p6m	E	R03AL	3446	32	360562	1974	0.2944	1.3424	0.931017	1.93548	0.12	0	R03AL Adrenergics in combination with anticholinergics incl. triple combinations with corticosteroids	0.176
p6m	E	R03BA	3378	100	356418	6118	0.4681	1.597	1.29539	1.9688	1.2e-05	-1	R03BA Glucocorticoids	4.46e-05
p6m	E	R03BB	3425	53	358708	3828	0.1231	1.131	0.846434	1.51111	0.41	0	R03BB Anticholinergics	0.492
p6m	E	R03DA	3470	8	362154	382	0.2509	1.2851	0.626941	2.63426	0.49	0	R03DA Xanthines	0.571
p6m	E	R03DC	3453	25	360203	2333	-0.2462	0.7818	0.521865	1.17115	0.23	0	R03DC Leukotriene receptor antagonists	0.302
p6m	E	R05CB	3442	36	360245	2291	0.2117	1.2358	0.874503	1.74638	0.23	0	R05CB Mucolytics	0.302
p6m	E	R05DA	3388	90	358051	4485	0.6033	1.8281	1.47511	2.26567	3.6e-08	-1	R05DA Opium alkaloids and derivatives	1.82e-07
p6m	E	R06AB	3467	11	362044	492	0.6648	1.944	1.06397	3.55211	0.031	-1	R06AB Substituted alkylamines	0.0587
p6m	E	R06AD	3466	12	362065	471	0.6519	1.9191	1.0745	3.42775	0.028	-1	R06AD Phenothiazine derivatives	0.0541
p6m	E	R06AE	3359	119	357701	4835	0.7879	2.1989	1.81712	2.66081	5.6e-16	-1	R06AE Piperazine derivatives	5.81e-15
p6m	E	R06AX	3391	87	356248	6288	0.2152	1.2401	0.997336	1.54195	0.053	0	R06AX Other antihistamines for systemic use	0.0916
p6m	E	S01AA	3445	33	361445	1091	1.0539	2.869	2.01508	4.08467	5e-09	-1	S01AA Antibiotics	2.98e-08
p6m	E	S01BA	3472	6	361909	627	-0.0422	0.9587	0.427882	2.14797	0.92	0	S01BA Corticosteroids, plain	0.929
p6m	E	S01EC	3462	16	360222	2314	-0.2552	0.7748	0.472179	1.2713	0.31	0	S01EC Carbonic anhydrase inhibitors	0.391
p6m	E	S01ED	3455	23	359166	3370	-0.2002	0.8186	0.541602	1.23722	0.34	0	S01ED Beta blocking agents	0.424
p6m	E	S01EE	3427	51	356969	5567	0.0291	1.0296	0.778273	1.36198	0.84	0	S01EE Prostaglandin analogues	0.871
p6m	E	S01GX	3457	21	361279	1257	0.3739	1.4533	0.938168	2.25137	0.094	0	S01GX Other antiallergics	0.148
p6m	E	S01XA	3349	129	350745	11791	0.1579	1.171	0.977489	1.40291	0.087	0	S01XA Other ophthalmologicals	0.139
p6m	E	S02CA	3472	6	362287	249	0.8318	2.2976	1.01506	5.20047	0.046	-1	S02CA Corticosteroids and antiinfectives in combination	0.0816
p6m	E	V03AE	3470	8	362450	86	1.5042	4.5005	2.07259	9.77274	0.00014	-1	V03AE Drugs for treatment of hyperkalemia and hyperphosphatemia	0.000445
p6m	E	V06DC	3468	10	362404	132	1.448	4.2546	2.15931	8.38286	2.9e-05	-1	V06DC Carbohydrates	0.000104
p6m	E	V07AY	3393	85	358884	3652	0.4452	1.5607	1.23742	1.96854	0.00017	-1	V07AY Other non-therapeutic auxiliary products	0.000523
p6m	F	A01AB	3423	55	24315	363	0.1601	1.1737	0.87702	1.57064	0.28	0	A01AB Antiinfectives and antiseptics for local oral treatment	0.634
p6m	F	A01AD	3462	16	24580	98	0.2376	1.2682	0.735767	2.18579	0.39	0	A01AD Other agents for local oral treatment	0.716
p6m	F	A02BA	3435	43	24149	529	-0.4415	0.6431	0.467789	0.884081	0.0066	1	A02BA H2-receptor antagonists [DG:DG01481]	0.0758
p6m	F	A02BC	2602	876	16225	8453	-0.3093	0.734	0.67328	0.800122	2.1e-12	1	A02BC Proton pump inhibitors [DG:DG01646]	4.14e-10
p6m	F	A02BX	3387	91	23961	717	0.0543	1.0558	0.841902	1.32401	0.64	0	A02BX Other drugs for peptic ulcer and gastro-oesophageal reflux disease (GORD)	0.846
p6m	F	A03AA	3450	28	24383	295	-0.3263	0.7216	0.485883	1.07167	0.11	0	A03AA Synthetic anticholinergics, esters with tertiary amino group	0.394
p6m	F	A03AX	3465	13	24544	134	-0.2656	0.7668	0.429715	1.36819	0.37	0	A03AX Other drugs for functional gastrointestinal disorders	0.708
p6m	F	A03BB	3431	47	24343	335	0.0633	1.0654	0.777363	1.46012	0.69	0	A03BB Belladonna alkaloids, semisynthetic, quaternary ammonium compounds	0.85
p6m	F	A03FA	3455	23	24429	249	-0.3636	0.6952	0.449138	1.07602	0.1	0	A03FA Propulsives [DG:DG01763]	0.372
p6m	F	A04AA	3472	6	24604	74	-0.4061	0.6663	0.287392	1.54456	0.34	0	A04AA Serotonin (5HT3) antagonists	0.67
p6m	F	A05AA	3471	7	24625	53	0.0525	1.0539	0.472821	2.34903	0.9	0	A05AA Bile acid and derivatives [DG:DG01956]	0.969
p6m	F	A06AA	3402	76	24148	530	0.1721	1.1878	0.925101	1.52508	0.18	0	A06AA Softeners, emollients	0.529
p6m	F	A06AB	3357	121	23942	736	0.2738	1.3149	1.07209	1.61279	0.0086	-1	A06AB Contact laxatives	0.077
p6m	F	A06AC	3467	11	24513	165	-0.4845	0.616	0.332554	1.14112	0.12	0	A06AC Bulk-forming laxatives	0.422
p6m	F	A06AD	3262	216	22789	1889	-0.0252	0.9751	0.838397	1.13408	0.74	0	A06AD Osmotically acting laxatives	0.884
p6m	F	A06AG	3469	9	24636	42	0.5321	1.7025	0.81452	3.55868	0.16	0	A06AG Enemas	0.515
p6m	F	A06AX	3471	7	24558	120	-0.7205	0.4865	0.225411	1.05007	0.066	0	A06AX Other drugs for constipation	0.317
p6m	F	A07AA	3454	24	24484	194	-0.0021	0.9979	0.646163	1.54099	0.99	0	A07AA Antibiotics	0.995
p6m	F	A07DA	3429	49	24263	415	-0.0141	0.986	0.726761	1.33772	0.93	0	A07DA Antipropulsives	0.99
p6m	F	A07EC	3447	31	24379	299	-0.243	0.7843	0.538267	1.14266	0.21	0	A07EC Aminosalicylic acid and similar agents	0.575
p6m	F	A08AB	3470	8	24651	27	0.4408	1.554	0.694044	3.47927	0.28	0	A08AB Peripherally acting antiobesity products	0.634
p6m	F	A09AB	3473	5	24667	11	1.4001	4.0556	1.39615	11.7807	0.01	-1	A09AB Acid preparations	0.0821
p6m	F	A10AB	3372	106	23847	831	-0.164	0.8487	0.671557	1.0726	0.17	0	A10AB Insulins and analogues for injection, fast-acting	0.515
p6m	F	A10AC	3461	17	24555	123	-0.0044	0.9956	0.587577	1.6871	0.99	0	A10AC Insulins and analogues for injection, intermediate-acting	0.995
p6m	F	A10AD	3446	32	24491	187	0.225	1.2523	0.840521	1.8659	0.27	0	A10AD Insulins and analogues for injection, intermediate- or long-acting combined with fast-acting	0.634
p6m	F	A10AE	3452	26	24388	290	-0.5784	0.5608	0.368002	0.854548	0.0071	1	A10AE Insulins and analogues for injection, long-acting	0.0758
p6m	F	A10BA	3237	241	23005	1673	0.0171	1.0173	0.858052	1.20602	0.84	0	A10BA Biguanides [DG:DG01684]	0.935
p6m	F	A10BB	3404	74	24143	535	-0.0368	0.9639	0.736729	1.26108	0.79	0	A10BB Sulfonylureas	0.905
p6m	F	A10BD	3472	6	24650	28	0.2285	1.2567	0.507215	3.11347	0.62	0	A10BD Combinations of oral blood glucose lowering drugs	0.842
p6m	F	A10BG	3470	8	24632	46	0.3435	1.4099	0.654854	3.03569	0.38	0	A10BG Thiazolidinediones [DG:DG01683]	0.713
p6m	F	A10BH	3408	70	24202	476	0.0934	1.098	0.834778	1.4441	0.5	0	A10BH Dipeptidyl peptidase 4 (DPP-4) inhibitors [DG:DG01601]	0.801
p6m	F	A10BJ	3455	23	24536	142	-0.1364	0.8725	0.549374	1.38568	0.56	0	A10BJ Glucagon-like peptide-1 receptor (GLP-1) analogues	0.83
p6m	F	A10BK	3430	48	24451	227	0.1728	1.1887	0.850947	1.66039	0.31	0	A10BK Sodium-glucose co-transporter 2 (SGLT2) inhibitors	0.65
p6m	F	A11CC	3403	75	24064	614	-0.067	0.9352	0.727591	1.20202	0.6	0	A11CC Vitamin D and analogues	0.832
p6m	F	A11DA	3445	33	24435	243	0.0049	1.0049	0.688044	1.46777	0.98	0	A11DA Vitamin B1, plain	0.995
p6m	F	A11EX	3471	7	24559	119	-0.8518	0.4267	0.197163	0.923276	0.031	1	A11EX Vitamin B-complex, other combinations	0.185
p6m	F	A12AA	3470	8	24610	68	-0.1012	0.9038	0.428136	1.90786	0.79	0	A12AA Calcium	0.905
p6m	F	A12AX	3224	254	22109	2569	-0.1258	0.8818	0.766938	1.01389	0.077	0	A12AX Calcium, combinations with vitamin D and/or other drugs	0.345
p6m	F	B01AA	3426	52	24103	575	-0.2545	0.7753	0.578258	1.03944	0.089	0	B01AA Vitamin K antagonists	0.351
p6m	F	B01AB	3467	11	24567	111	-0.3037	0.7381	0.393235	1.38545	0.34	0	B01AB Heparin group	0.67
p6m	F	B01AC	3083	395	21076	3602	-0.1086	0.897	0.79182	1.01625	0.088	0	B01AC Platelet aggregation inhibitors excl. heparin	0.351
p6m	F	B01AE	3470	8	24594	84	-0.1666	0.8465	0.405416	1.76766	0.66	0	B01AE Direct thrombin inhibitors	0.85
p6m	F	B01AF	3294	184	22795	1883	-0.121	0.886	0.754218	1.04086	0.14	0	B01AF Direct factor Xa inhibitors	0.467
p6m	F	B03AA	3377	101	23801	877	-0.0933	0.911	0.733317	1.13163	0.4	0	B03AA Iron bivalent, oral preparations	0.716
p6m	F	B03BA	3397	81	24049	629	0.0484	1.0496	0.825633	1.33438	0.69	0	B03BA Vitamin B12 (cyanocobalamin and analogues)	0.85
p6m	F	B03BB	3367	111	23838	840	0.1064	1.1123	0.903406	1.36947	0.32	0	B03BB Folic acid and derivatives	0.664
p6m	F	B05CB	3467	11	24614	64	0.3366	1.4001	0.729696	2.68658	0.31	0	B05CB Salt solutions	0.65
p6m	F	B05XA	3472	6	24597	81	-0.5491	0.5775	0.247589	1.34681	0.2	0	B05XA Electrolyte solutions	0.571
p6m	F	C01AA	3447	31	24352	326	-0.0902	0.9138	0.626615	1.33251	0.64	0	C01AA Digitalis glycosides [DG:DG01697]	0.846
p6m	F	C01BD	3470	8	24577	101	-0.4207	0.6566	0.3147	1.36984	0.26	0	C01BD Antiarrhythmics, class III [DG:DG01648]	0.632
p6m	F	C01CA	3471	7	24615	63	-0.1122	0.8939	0.404464	1.97551	0.78	0	C01CA Adrenergic and dopaminergic agents	0.905
p6m	F	C01DA	3370	108	23709	969	-0.0444	0.9565	0.768368	1.19077	0.69	0	C01DA Organic nitrates	0.85
p6m	F	C01DX	3464	14	24496	182	-0.3887	0.678	0.388202	1.18402	0.17	0	C01DX Other vasodilators used in cardiac diseases	0.515
p6m	F	C01EB	3458	20	24527	151	0.1045	1.1102	0.686067	1.79638	0.67	0	C01EB Other cardiac preparations	0.85
p6m	F	C02CA	3408	70	23968	710	-0.2146	0.8069	0.624911	1.0419	0.1	0	C02CA Alpha-adrenoreceptor antagonists	0.372
p6m	F	C03AA	3379	99	23809	869	0.0211	1.0214	0.820668	1.27117	0.85	0	C03AA Thiazides, plain [DG:DG01749]	0.941
p6m	F	C03BA	3417	61	24096	582	-0.1755	0.839	0.639319	1.10105	0.21	0	C03BA Sulfonamides, plain	0.575
p6m	F	C03CA	3323	155	23198	1480	-0.0771	0.9258	0.773125	1.10855	0.4	0	C03CA Sulfonamides, plain	0.716
p6m	F	C03DA	3437	41	24205	473	-0.3642	0.6948	0.500198	0.965043	0.03	1	C03DA Aldosterone antagonists	0.185
p6m	F	C03EB	3473	5	24645	33	0.3111	1.3649	0.524844	3.54951	0.52	0	C03EB High-ceiling diuretics and potassium-sparing agents	0.826
p6m	F	C05AX	3451	27	24417	261	-0.2752	0.7594	0.507522	1.1363	0.18	0	C05AX Other agents for treatment of hemorrhoids and anal fissures for topical use	0.529
p6m	F	C07AA	3449	29	24377	301	-0.3818	0.6826	0.463077	1.00619	0.054	0	C07AA Beta blocking agents, non-selective	0.295
p6m	F	C07AB	3135	343	21023	3655	-0.3107	0.7329	0.644569	0.833342	2.1e-06	1	C07AB Beta blocking agents, selective	0.000138
p6m	F	C07AG	3465	13	24591	87	0.1574	1.1705	0.644377	2.1262	0.6	0	C07AG Alpha and beta blocking agents	0.832
p6m	F	C08CA	2980	498	20581	4097	-0.0397	0.9611	0.862158	1.07137	0.47	0	C08CA Dihydropyridine derivatives [DG:DG01928]	0.772
p6m	F	C08DA	3469	9	24605	73	0.002	1.0021	0.49587	2.02494	0.99	0	C08DA Phenylalkylamine derivatives	0.995
p6m	F	C08DB	3455	23	24346	332	-0.4821	0.6175	0.401198	0.950335	0.028	1	C08DB Benzothiazepine derivatives	0.185
p6m	F	C09AA	3035	443	20738	3940	-0.1763	0.8384	0.748534	0.939014	0.0023	1	C09AA ACE inhibitors, plain [DG:DG01501]	0.0412
p6m	F	C09CA	3223	255	22211	2467	-0.2035	0.8159	0.708076	0.940043	0.0049	1	C09CA Angiotensin II receptor blockers, plain [DG:DG01495]	0.0704
p6m	F	C09DX	3470	8	24624	54	0.1173	1.1244	0.525723	2.40502	0.76	0	C09DX Angiotensin II receptor blockers (ARBs), other combinations	0.897
p6m	F	C10AA	2470	1008	15971	8707	-0.0753	0.9274	0.848909	1.0132	0.095	0	C10AA HMG CoA reductase inhibitors [DG:DG01660]	0.367
p6m	F	C10AB	3465	13	24538	140	-0.2574	0.7731	0.433239	1.37939	0.38	0	C10AB Fibrates	0.713
p6m	F	C10AC	3470	8	24606	72	-0.1379	0.8712	0.414483	1.8312	0.72	0	C10AC Bile acid sequestrants	0.876
p6m	F	C10AX	3442	36	24333	345	-0.1054	0.9	0.633147	1.27928	0.56	0	C10AX Other lipid modifying agents	0.83
p6m	F	D01AC	3383	95	24055	623	0.1592	1.1725	0.936508	1.46805	0.17	0	D01AC Imidazole and triazole derivatives	0.515
p6m	F	D01AE	3466	12	24570	108	-0.1745	0.8398	0.457652	1.54118	0.57	0	D01AE Other antifungals for topical use	0.83
p6m	F	D01BA	3469	9	24623	55	0.177	1.1936	0.583633	2.44118	0.63	0	D01BA Antifungals for systemic use	0.844
p6m	F	D02AC	3437	41	24235	443	-0.2548	0.775	0.558759	1.07506	0.13	0	D02AC Soft paraffin and fat products	0.442
p6m	F	D02AE	3463	15	24549	129	-0.0751	0.9277	0.537638	1.60067	0.79	0	D02AE Carbamide products	0.905
p6m	F	D02AX	3281	197	23236	1442	0.1111	1.1175	0.953376	1.30989	0.17	0	D02AX Other emollients and protectives	0.515
p6m	F	D05AX	3460	18	24521	157	-0.1417	0.8679	0.528739	1.4246	0.57	0	D05AX Other antipsoriatics for topical use	0.83
p6m	F	D06AX	3459	19	24488	190	-0.2957	0.744	0.459945	1.20355	0.23	0	D06AX Other antibiotics for topical use	0.612
p6m	F	D06BX	3472	6	24613	65	-0.4447	0.641	0.274835	1.49512	0.3	0	D06BX Other chemotherapeutics	0.649
p6m	F	D07AA	3453	25	24472	206	-0.036	0.9647	0.63193	1.47257	0.87	0	D07AA Corticosteroids, weak (group I)	0.952
p6m	F	D07AB	3453	25	24491	187	0.0739	1.0767	0.70251	1.65035	0.73	0	D07AB Corticosteroids, moderately potent (group II)	0.882
p6m	F	D07AC	3407	71	24061	617	-0.0717	0.9308	0.723184	1.19811	0.58	0	D07AC Corticosteroids, potent (group III)	0.83
p6m	F	D07AD	3457	21	24502	176	0.0487	1.0499	0.662354	1.66433	0.84	0	D07AD Corticosteroids, very potent (group IV)	0.935
p6m	F	D07CA	3465	13	24600	78	0.309	1.3621	0.748032	2.4801	0.31	0	D07CA Corticosteroids, weak, combinations with antibiotics	0.65
p6m	F	D07CC	3446	32	24510	168	0.3586	1.4313	0.97009	2.11179	0.071	0	D07CC Corticosteroids, potent, combinations with antibiotics	0.33
p6m	F	D07CD	3469	9	24627	51	0.3044	1.3559	0.660356	2.78391	0.41	0	D07CD Corticosteroids, very potent, combinations with antibiotics	0.728
p6m	F	D09AA	3469	9	24628	50	0.3893	1.4759	0.713956	3.05107	0.29	0	D09AA Medicated dressings with antiinfectives	0.649
p6m	F	D11AC	3466	12	24593	85	0.0022	1.0022	0.540136	1.8594	0.99	0	D11AC Medicated shampoos	0.995
p6m	F	G01AF	3462	16	24518	160	-0.3094	0.7339	0.434702	1.23894	0.25	0	G01AF Imidazole derivatives	0.623
p6m	F	G03AC	3473	5	24653	25	-0.2459	0.782	0.297434	2.0559	0.62	0	G03AC Progestogens	0.842
p6m	F	G03BA	3463	15	24603	75	0.178	1.1949	0.673798	2.11891	0.54	0	G03BA 3-oxoandrosten (4) derivatives	0.83
p6m	F	G03CA	3376	102	23660	1018	-0.4189	0.6578	0.531353	0.814225	0.00012	1	G03CA Natural and semisynthetic estrogens, plain	0.00473
p6m	F	G03DA	3469	9	24629	49	-0.2781	0.7572	0.369249	1.55273	0.45	0	G03DA Pregnen (4) derivatives	0.758
p6m	F	G03FA	3471	7	24634	44	-0.2391	0.7873	0.351567	1.7632	0.56	0	G03FA Progestogens and estrogens, fixed combinations	0.83
p6m	F	G03FB	3462	16	24628	50	0.3454	1.4126	0.796802	2.50431	0.24	0	G03FB Progestogens and estrogens, sequential preparations	0.614
p6m	F	G04BD	3394	84	23858	820	-0.1288	0.8792	0.696844	1.10924	0.28	0	G04BD Urinary antispasmodics	0.634
p6m	F	G04BE	3376	102	24017	661	0.0595	1.0613	0.852175	1.32163	0.59	0	G04BE Drugs used in erectile dysfunction	0.83
p6m	F	G04CA	3465	13	24570	108	-0.0368	0.9639	0.53589	1.73368	0.9	0	G04CA Alpha-adrenoreceptor antagonists	0.969
p6m	F	G04CB	3416	62	23907	771	-0.2965	0.7434	0.568828	0.971611	0.03	1	G04CB Testosterone-5-alpha reductase inhibitors	0.185
p6m	F	H02AA	3470	8	24610	68	-0.0129	0.9872	0.460626	2.11568	0.97	0	H02AA Mineralocorticoids	0.995
p6m	F	H02AB	3317	161	23265	1413	-0.0503	0.9509	0.799136	1.13151	0.57	0	H02AB Glucocorticoids	0.83
p6m	F	H03AA	3246	232	22498	2180	-0.2078	0.8123	0.702516	0.939308	0.005	1	H03AA Thyroid hormones	0.0704
p6m	F	J01AA	3316	162	23651	1027	0.2454	1.2781	1.07211	1.52374	0.0062	-1	J01AA Tetracyclines [DG:DG01197]	0.0758
p6m	F	J01CA	3265	213	23388	1290	0.2881	1.3339	1.14289	1.55685	0.00026	-1	J01CA Penicillins with extended spectrum [DG:DG01780]	0.00635
p6m	F	J01CE	3463	15	24522	156	-0.3936	0.6747	0.39366	1.15622	0.15	0	J01CE Beta-lactamase sensitive penicillins [DG:DG01778]	0.492
p6m	F	J01CF	3366	112	23876	802	0.0569	1.0585	0.86152	1.30056	0.59	0	J01CF Beta-lactamase resistant penicillins [DG:DG01779]	0.83
p6m	F	J01CR	3426	52	24230	448	-0.1076	0.898	0.668763	1.20572	0.47	0	J01CR Combinations of penicillins, incl. beta-lactamase inhibitors	0.772
p6m	F	J01DB	3461	17	24433	245	-0.4857	0.6153	0.373765	1.01283	0.056	0	J01DB First-generation cephalosporins [DG:DG01774]	0.298
p6m	F	J01EA	3433	45	24269	409	-0.1248	0.8826	0.643316	1.21098	0.44	0	J01EA Trimethoprim and derivatives [DG:DG01581]	0.754
p6m	F	J01EE	3471	7	24617	61	-0.1349	0.8738	0.395248	1.93192	0.74	0	J01EE Combinations of sulfonamides and trimethoprim, incl. derivatives	0.884
p6m	F	J01FA	3408	70	24084	594	-0.0804	0.9228	0.713839	1.19283	0.54	0	J01FA Macrolides [DG:DG01551]	0.83
p6m	F	J01FF	3472	6	24648	30	0.4727	1.6043	0.65188	3.94841	0.3	0	J01FF Lincosamides [DG:DG01578]	0.649
p6m	F	J01MA	3459	19	24444	234	-0.4476	0.6392	0.398052	1.02631	0.064	0	J01MA Fluoroquinolones [DG:DG01549]	0.317
p6m	F	J01XE	3343	135	23368	1310	-0.1654	0.8476	0.704832	1.01923	0.079	0	J01XE Nitrofuran derivatives	0.346
p6m	F	J02AC	3459	19	24527	151	-0.0433	0.9576	0.588749	1.55764	0.86	0	J02AC Triazole derivatives	0.946
p6m	F	J05AB	3446	32	24483	195	0.1909	1.2103	0.824599	1.77648	0.33	0	J05AB Nucleosides and nucleotides excl. reverse transcriptase inhibitors [DG:DG02840]	0.67
p6m	F	L01BC	3471	7	24596	82	-0.2197	0.8028	0.368995	1.74653	0.58	0	L01BC Pyrimidine analogues	0.83
p6m	F	L02AE	3467	11	24446	232	-0.83	0.4361	0.23684	0.802877	0.0077	1	L02AE Gonadotropin releasing hormone analogues	0.0758
p6m	F	L02BA	3472	6	24593	85	-0.805	0.4471	0.193163	1.0348	0.06	0	L02BA Anti-estrogens	0.311
p6m	F	L02BG	3449	29	24377	301	-0.1766	0.8381	0.568057	1.23647	0.37	0	L02BG Aromatase inhibitors [DG:DG01596]	0.708
p6m	F	L04AA	3472	6	24618	60	-0.3528	0.7027	0.300263	1.64455	0.42	0	L04AA Selective immunosuppressants	0.732
p6m	F	L04AX	3444	34	24374	304	-0.084	0.9194	0.640019	1.32086	0.65	0	L04AX Other immunosuppressants	0.848
p6m	F	M01AB	3462	16	24564	114	-0.07	0.9324	0.546227	1.59159	0.8	0	M01AB Acetic acid derivatives and related substances	0.911
p6m	F	M01AE	3363	115	23574	1104	-0.3678	0.6923	0.567744	0.84414	0.00028	1	M01AE Propionic acid derivatives	0.00635
p6m	F	M01AH	3466	12	24573	105	-0.2278	0.7963	0.434062	1.46083	0.46	0	M01AH Coxibs	0.768
p6m	F	M02AA	3330	148	23533	1145	0.1098	1.1161	0.931633	1.33706	0.23	0	M02AA Antiinflammatory preparations, non-steroids for topical use	0.612
p6m	F	M03BX	3468	10	24556	122	-0.5746	0.5629	0.292691	1.08267	0.085	0	M03BX Other centrally acting agents	0.351
p6m	F	M04AA	3366	112	23868	810	0.0841	1.0877	0.882427	1.34071	0.43	0	M04AA Preparations inhibiting uric acid production	0.743
p6m	F	M04AC	3458	20	24542	136	0.1333	1.1426	0.706707	1.84719	0.59	0	M04AC Preparations with no effect on uric acid metabolism	0.83
p6m	F	M05BA	3392	86	23710	968	-0.1516	0.8593	0.683829	1.07991	0.19	0	M05BA Bisphosphonates [DG:DG01600]	0.55
p6m	F	M05BX	3473	5	24629	49	0.0488	1.05	0.412294	2.6739	0.92	0	M05BX Other drugs affecting bone structure and mineralization	0.985
p6m	F	N01BB	3460	18	24495	183	-0.2738	0.7605	0.464386	1.24549	0.28	0	N01BB Amides	0.634
p6m	F	N01BX	3473	5	24609	69	-0.5439	0.5805	0.23124	1.45731	0.25	0	N01BX Other local anesthetics	0.623
p6m	F	N02AA	3375	103	23827	851	-0.0521	0.9492	0.766235	1.17596	0.63	0	N02AA Natural opium alkaloids	0.844
p6m	F	N02AB	3467	11	24579	99	-0.129	0.879	0.466648	1.6556	0.69	0	N02AB Phenylpiperidine derivatives	0.85
p6m	F	N02AE	3442	36	24424	254	0.1691	1.1843	0.824853	1.70037	0.36	0	N02AE Oripavine derivatives	0.702
p6m	F	N02AJ	3285	193	22926	1752	-0.1693	0.8442	0.721398	0.987996	0.035	1	N02AJ Opioids in combination with non-opioid analgesics	0.203
p6m	F	N02AX	3421	57	23996	682	-0.5152	0.5974	0.452066	0.789427	0.00029	1	N02AX Other opioids	0.00635
p6m	F	N02BE	2950	528	20209	4469	-0.0438	0.9572	0.86129	1.06372	0.42	0	N02BE Anilides	0.732
p6m	F	N02BG	3471	7	24623	55	0.0118	1.0119	0.455293	2.24875	0.98	0	N02BG Other analgesics and antipyretics	0.995
p6m	F	N02CC	3441	37	24430	248	-0.0744	0.9283	0.651717	1.32239	0.68	0	N02CC Selective serotonin (5HT1) agonists [DG:DG01943]	0.85
p6m	F	N02CX	3470	8	24617	61	-0.2245	0.7989	0.373647	1.7083	0.56	0	N02CX Other antimigraine preparations	0.83
p6m	F	N03AB	3470	8	24644	34	0.3923	1.4804	0.661948	3.31089	0.34	0	N03AB Hydantoin derivatives	0.67
p6m	F	N03AE	3467	11	24588	90	-0.1216	0.8855	0.465013	1.68614	0.71	0	N03AE Benzodiazepine derivatives	0.869
p6m	F	N03AF	3463	15	24537	141	-0.2332	0.792	0.460082	1.36327	0.4	0	N03AF Carboxamide derivatives	0.716
p6m	F	N03AG	3461	17	24545	133	-0.2797	0.756	0.446844	1.27916	0.3	0	N03AG Fatty acid derivatives	0.649
p6m	F	N03AX	3295	183	22929	1749	-0.304	0.7379	0.627249	0.867978	0.00024	1	N03AX Other antiepileptics	0.00635
p6m	F	N04BA	3449	29	24361	317	-0.1484	0.8621	0.584763	1.27095	0.45	0	N04BA Dopa and dopa derivatives	0.758
p6m	F	N04BC	3456	22	24498	180	0.1431	1.1538	0.735744	1.80943	0.53	0	N04BC Dopamine agonists	0.829
p6m	F	N04BD	3472	6	24611	67	-0.172	0.842	0.362432	1.95612	0.69	0	N04BD Monoamine oxidase B inhibitors	0.85
p6m	F	N05AB	3452	26	24403	275	-0.2645	0.7676	0.50904	1.15751	0.21	0	N05AB Phenothiazines with piperazine structure	0.575
p6m	F	N05AD	3470	8	24638	40	0.4668	1.5949	0.727493	3.49667	0.24	0	N05AD Butyrophenone derivatives [DG:DG01940]	0.614
p6m	F	N05AH	3455	23	24507	171	-0.1013	0.9036	0.575637	1.41847	0.66	0	N05AH Diazepines, oxazepines and thiazepines	0.85
p6m	F	N05AN	3473	5	24615	63	-0.4596	0.6315	0.251241	1.58739	0.33	0	N05AN Lithium	0.67
p6m	F	N05AX	3449	29	24575	103	0.6004	1.8229	1.17483	2.82841	0.0074	-1	N05AX Other antipsychotics	0.0758
p6m	F	N05BA	3396	82	24190	488	0.2132	1.2376	0.967697	1.58286	0.089	0	N05BA Benzodiazepine derivatives [DG:DG01914]	0.351
p6m	F	N05CD	3436	42	24525	153	0.8535	2.3478	1.64038	3.36038	3.1e-06	-1	N05CD Benzodiazepine derivatives	0.000153
p6m	F	N05CF	3419	59	24177	501	-0.0892	0.9147	0.692708	1.20784	0.53	0	N05CF Benzodiazepine related drugs	0.829
p6m	F	N06AA	3313	165	23110	1568	-0.2181	0.8041	0.678583	0.952742	0.012	1	N06AA Non-selective monoamine reuptake inhibitors [DG:DG01730]	0.0946
p6m	F	N06AB	3192	286	22544	2134	-0.0796	0.9235	0.803553	1.06137	0.26	0	N06AB Selective serotonin reuptake inhibitors	0.632
p6m	F	N06AX	3326	152	23578	1100	-0.0208	0.9794	0.815073	1.17686	0.82	0	N06AX Other antidepressants	0.923
p6m	F	N06DA	3421	57	24412	266	0.5631	1.7562	1.28189	2.40598	0.00046	-1	N06DA Anticholinesterases	0.00906
p6m	F	N06DX	3418	60	24510	168	1.1273	3.0874	2.23769	4.25968	6.7e-12	-1	N06DX Other anti-dementia drugs	6.6e-10
p6m	F	N07CA	3445	33	24447	231	0.2062	1.229	0.84623	1.78485	0.28	0	N07CA Antivertigo preparations	0.634
p6m	F	P01AB	3460	18	24552	126	-0.0016	0.9984	0.602958	1.65312	0.99	0	P01AB Nitroimidazole derivatives	0.995
p6m	F	P01BA	3461	17	24532	146	-0.0619	0.94	0.563236	1.56863	0.81	0	P01BA Aminoquinolines	0.917
p6m	F	P01BC	3437	41	24262	416	-0.1126	0.8935	0.64247	1.24261	0.5	0	P01BC Methanolquinolines	0.801
p6m	F	R01AC	3472	6	24647	31	0.3799	1.4621	0.600026	3.56284	0.4	0	R01AC Antiallergic agents, excl. corticosteroids	0.716
p6m	F	R01AD	3336	142	23293	1385	-0.2188	0.8035	0.670753	0.962408	0.018	1	R01AD Corticosteroids	0.131
p6m	F	R03AC	3191	287	22269	2409	-0.1349	0.8738	0.754519	1.01198	0.072	0	R03AC Selective beta-2-adrenoreceptor agonists	0.33
p6m	F	R03AK	3293	185	23204	1474	-0.0448	0.9562	0.801864	1.14031	0.62	0	R03AK Adrenergics in combination with corticosteroids or other drugs, excl. anticholinergics	0.842
p6m	F	R03AL	3446	32	24394	284	0.058	1.0597	0.722338	1.55458	0.77	0	R03AL Adrenergics in combination with anticholinergics incl. triple combinations with corticosteroids	0.903
p6m	F	R03BA	3378	100	23889	789	-0.0763	0.9265	0.741615	1.15759	0.5	0	R03BA Glucocorticoids	0.801
p6m	F	R03BB	3425	53	24072	606	-0.2488	0.7797	0.576635	1.05438	0.11	0	R03BB Anticholinergics	0.394
p6m	F	R03DA	3470	8	24608	70	0.0042	1.0042	0.473821	2.12821	0.99	0	R03DA Xanthines	0.995
p6m	F	R03DC	3453	25	24401	277	-0.5229	0.5928	0.387919	0.905839	0.016	1	R03DC Leukotriene receptor antagonists	0.121
p6m	F	R05CB	3442	36	24232	446	-0.3105	0.7331	0.513483	1.04661	0.087	0	R05CB Mucolytics	0.351
p6m	F	R05DA	3388	90	23732	946	-0.3126	0.7315	0.585302	0.914233	0.006	1	R05DA Opium alkaloids and derivatives	0.0758
p6m	F	R06AB	3467	11	24588	90	0.0459	1.047	0.554193	1.97784	0.89	0	R06AB Substituted alkylamines	0.969
p6m	F	R06AD	3466	12	24593	85	-0.0013	0.9987	0.539164	1.84995	1	0	R06AD Phenothiazine derivatives	1
p6m	F	R06AE	3359	119	23949	729	0.2731	1.314	1.07169	1.61113	0.0086	-1	R06AE Piperazine derivatives	0.077
p6m	F	R06AX	3391	87	23962	716	-0.137	0.872	0.691986	1.09876	0.24	0	R06AX Other antihistamines for systemic use	0.614
p6m	F	S01AA	3445	33	24444	234	0.0872	1.0911	0.75018	1.58692	0.65	0	S01AA Antibiotics	0.848
p6m	F	S01BA	3472	6	24543	135	-0.9161	0.4001	0.1756	0.91146	0.029	1	S01BA Corticosteroids, plain	0.185
p6m	F	S01EC	3462	16	24395	283	-0.6007	0.5484	0.329736	0.912185	0.021	1	S01EC Carbonic anhydrase inhibitors	0.148
p6m	F	S01ED	3455	23	24306	372	-0.5687	0.5663	0.36944	0.868	0.0091	1	S01ED Beta blocking agents	0.0779
p6m	F	S01EE	3427	51	24070	608	-0.2754	0.7593	0.566882	1.01692	0.065	0	S01EE Prostaglandin analogues	0.317
p6m	F	S01GX	3457	21	24525	153	0.0154	1.0155	0.635896	1.62183	0.95	0	S01GX Other antiallergics	0.995
p6m	F	S01XA	3349	129	23187	1491	-0.2864	0.751	0.621803	0.906944	0.0029	1	S01XA Other ophthalmologicals	0.0476
p6m	F	S02CA	3472	6	24635	43	-0.0237	0.9765	0.410327	2.32412	0.96	0	S02CA Corticosteroids and antiinfectives in combination	0.995
p6m	F	V03AE	3470	8	24628	50	0.1252	1.1334	0.518749	2.47638	0.75	0	V03AE Drugs for treatment of hyperkalemia and hyperphosphatemia	0.89
p6m	F	V06DC	3468	10	24636	42	0.751	2.1191	1.04131	4.31243	0.038	-1	V06DC Carbohydrates	0.214
p6m	F	V07AY	3393	85	23977	701	-0.1875	0.8291	0.651416	1.05514	0.13	0	V07AY Other non-therapeutic auxiliary products	0.442
p6m	G	A01AB	1146	25	24315	363	0.2803	1.3235	0.874269	2.00352	0.18	0	A01AB Antiinfectives and antiseptics for local oral treatment	0.383
p6m	G	A01AD	1160	11	24580	98	0.6673	1.9489	1.01687	3.73526	0.044	-1	A01AD Other agents for local oral treatment	0.182
p6m	G	A02BA	1142	29	24149	529	0.0019	1.0019	0.681825	1.4722	0.99	0	A02BA H2-receptor antagonists [DG:DG01481]	0.996
p6m	G	A02BC	826	345	16225	8453	-0.3496	0.705	0.615428	0.807562	4.6e-07	1	A02BC Proton pump inhibitors [DG:DG01646]	9.54e-06
p6m	G	A02BX	1134	37	23961	717	-0.0225	0.9777	0.694131	1.37715	0.9	0	A02BX Other drugs for peptic ulcer and gastro-oesophageal reflux disease (GORD)	0.982
p6m	G	A03AA	1160	11	24383	295	-0.2859	0.7513	0.408036	1.38352	0.36	0	A03AA Synthetic anticholinergics, esters with tertiary amino group	0.589
p6m	G	A03AX	1166	5	24544	134	-0.2371	0.7889	0.3206	1.94113	0.61	0	A03AX Other drugs for functional gastrointestinal disorders	0.756
p6m	G	A03BB	1142	29	24343	335	0.5323	1.7028	1.14917	2.52326	0.008	-1	A03BB Belladonna alkaloids, semisynthetic, quaternary ammonium compounds	0.0604
p6m	G	A03FA	1151	20	24429	249	0.4125	1.5105	0.945852	2.4123	0.084	0	A03FA Propulsives [DG:DG01763]	0.254
p6m	G	A04AA	1166	5	24604	74	0.3545	1.4255	0.568477	3.57456	0.45	0	A04AA Serotonin (5HT3) antagonists	0.65
p6m	G	A06AA	1116	55	24148	530	0.6699	1.954	1.45834	2.61806	7.2e-06	-1	A06AA Softeners, emollients	0.000133
p6m	G	A06AB	1082	89	23942	736	0.7213	2.057	1.61911	2.61335	3.5e-09	-1	A06AB Contact laxatives	1.94e-07
p6m	G	A06AC	1165	6	24513	165	-0.2287	0.7956	0.348974	1.81377	0.59	0	A06AC Bulk-forming laxatives	0.742
p6m	G	A06AD	1037	134	22789	1889	0.3642	1.4393	1.18751	1.74447	0.00021	-1	A06AD Osmotically acting laxatives	0.00268
p6m	G	A06AX	1166	5	24558	120	-0.1284	0.8795	0.355897	2.17341	0.78	0	A06AX Other drugs for constipation	0.881
p6m	G	A07AA	1154	17	24484	194	0.6134	1.8468	1.11029	3.07182	0.018	-1	A07AA Antibiotics	0.111
p6m	G	A07DA	1140	31	24263	415	0.3515	1.4213	0.972506	2.0771	0.069	0	A07DA Antipropulsives	0.232
p6m	G	A07EC	1155	16	24379	299	0.0627	1.0647	0.638897	1.7742	0.81	0	A07EC Aminosalicylic acid and similar agents	0.896
p6m	G	A10AB	1105	66	23847	831	0.0649	1.067	0.791396	1.43869	0.67	0	A10AB Insulins and analogues for injection, fast-acting	0.8
p6m	G	A10AC	1160	11	24555	123	0.2177	1.2432	0.656246	2.355	0.5	0	A10AC Insulins and analogues for injection, intermediate-acting	0.686
p6m	G	A10AD	1147	24	24491	187	0.4363	1.547	0.978677	2.44529	0.062	0	A10AD Insulins and analogues for injection, intermediate- or long-acting combined with fast-acting	0.219
p6m	G	A10AE	1153	18	24388	290	-0.235	0.7906	0.478137	1.30715	0.36	0	A10AE Insulins and analogues for injection, long-acting	0.589
p6m	G	A10BA	1062	109	23005	1673	-0.1205	0.8865	0.695326	1.13025	0.33	0	A10BA Biguanides [DG:DG01684]	0.571
p6m	G	A10BB	1142	29	24143	535	-0.4049	0.667	0.445312	0.999164	0.05	1	A10BB Sulfonylureas	0.189
p6m	G	A10BH	1139	32	24202	476	-0.1699	0.8438	0.571793	1.24509	0.39	0	A10BH Dipeptidyl peptidase 4 (DPP-4) inhibitors [DG:DG01601]	0.589
p6m	G	A10BJ	1164	7	24536	142	-0.6119	0.5423	0.248553	1.18318	0.12	0	A10BJ Glucagon-like peptide-1 receptor (GLP-1) analogues	0.302
p6m	G	A10BK	1155	16	24451	227	-0.1689	0.8446	0.496378	1.43697	0.53	0	A10BK Sodium-glucose co-transporter 2 (SGLT2) inhibitors	0.7
p6m	G	A11CC	1130	41	24064	614	0.1244	1.1325	0.810435	1.58261	0.47	0	A11CC Vitamin D and analogues	0.656
p6m	G	A11DA	1143	28	24435	243	0.7186	2.0515	1.35868	3.09749	0.00063	-1	A11DA Vitamin B1, plain	0.00615
p6m	G	A11EX	1166	5	24559	119	-0.3448	0.7083	0.285731	1.75599	0.46	0	A11EX Vitamin B-complex, other combinations	0.653
p6m	G	A12AX	1038	133	22109	2569	0.1261	1.1344	0.935608	1.37553	0.2	0	A12AX Calcium, combinations with vitamin D and/or other drugs	0.405
p6m	G	B01AA	1143	28	24103	575	-0.172	0.842	0.568258	1.2476	0.39	0	B01AA Vitamin K antagonists	0.589
p6m	G	B01AB	1164	7	24567	111	0.2252	1.2526	0.577054	2.71893	0.57	0	B01AB Heparin group	0.728
p6m	G	B01AC	983	188	21076	3602	-0.1453	0.8648	0.722751	1.03475	0.11	0	B01AC Platelet aggregation inhibitors excl. heparin	0.29
p6m	G	B01AF	1072	99	22795	1883	0.0264	1.0268	0.825407	1.27721	0.81	0	B01AF Direct factor Xa inhibitors	0.896
p6m	G	B03AA	1101	70	23801	877	0.3243	1.383	1.06537	1.79534	0.015	-1	B03AA Iron bivalent, oral preparations	0.0996
p6m	G	B03BA	1125	46	24049	629	0.3259	1.3853	1.014	1.89254	0.041	-1	B03BA Vitamin B12 (cyanocobalamin and analogues)	0.182
p6m	G	B03BB	1111	60	23838	840	0.2835	1.3278	1.00671	1.75121	0.045	-1	B03BB Folic acid and derivatives	0.182
p6m	G	B05CB	1163	8	24614	64	0.7646	2.1481	1.01283	4.55601	0.046	-1	B05CB Salt solutions	0.182
p6m	G	C01AA	1158	13	24352	326	-0.3446	0.7085	0.402509	1.2472	0.23	0	C01AA Digitalis glycosides [DG:DG01697]	0.455
p6m	G	C01CA	1166	5	24615	63	0.6657	1.9458	0.774989	4.88566	0.16	0	C01CA Adrenergic and dopaminergic agents	0.364
p6m	G	C01DA	1113	58	23709	969	-0.0631	0.9389	0.697925	1.26307	0.68	0	C01DA Organic nitrates	0.801
p6m	G	C01DX	1160	11	24496	182	-0.1375	0.8715	0.464668	1.63455	0.67	0	C01DX Other vasodilators used in cardiac diseases	0.8
p6m	G	C01EB	1164	7	24527	151	-0.3742	0.6879	0.317133	1.49193	0.34	0	C01EB Other cardiac preparations	0.576
p6m	G	C02CA	1138	33	23968	710	-0.3188	0.727	0.505261	1.04615	0.086	0	C02CA Alpha-adrenoreceptor antagonists	0.255
p6m	G	C03AA	1133	38	23809	869	-0.1529	0.8582	0.61185	1.20374	0.38	0	C03AA Thiazides, plain [DG:DG01749]	0.589
p6m	G	C03BA	1140	31	24096	582	0.0004	1.0004	0.68932	1.45188	1	0	C03BA Sulfonamides, plain	1
p6m	G	C03CA	1069	102	23198	1480	0.1505	1.1624	0.926893	1.4578	0.19	0	C03CA Sulfonamides, plain	0.394
p6m	G	C03DA	1147	24	24205	473	-0.2237	0.7996	0.522375	1.22385	0.3	0	C03DA Aldosterone antagonists	0.547
p6m	G	C05AX	1159	12	24417	261	-0.0992	0.9056	0.50374	1.62803	0.74	0	C05AX Other agents for treatment of hemorrhoids and anal fissures for topical use	0.853
p6m	G	C07AA	1157	14	24377	301	-0.0092	0.9908	0.575589	1.70551	0.97	0	C07AA Beta blocking agents, non-selective	0.982
p6m	G	C07AB	1011	160	21023	3655	-0.3451	0.7081	0.587376	0.853732	0.0003	1	C07AB Beta blocking agents, selective	0.00332
p6m	G	C07AG	1163	8	24591	87	0.3363	1.3998	0.665888	2.94245	0.38	0	C07AG Alpha and beta blocking agents	0.589
p6m	G	C08CA	968	203	20581	4097	-0.1208	0.8862	0.751389	1.04523	0.15	0	C08CA Dihydropyridine derivatives [DG:DG01928]	0.351
p6m	G	C08DB	1161	10	24346	332	-0.598	0.5499	0.290007	1.04269	0.067	0	C08DB Benzothiazepine derivatives	0.232
p6m	G	C09AA	1005	166	20738	3940	-0.3476	0.7064	0.591769	0.843122	0.00012	1	C09AA ACE inhibitors, plain [DG:DG01501]	0.00166
p6m	G	C09CA	1076	95	22211	2467	-0.4111	0.6629	0.530867	0.827834	0.00029	1	C09CA Angiotensin II receptor blockers, plain [DG:DG01495]	0.00332
p6m	G	C10AA	789	382	15971	8707	-0.3742	0.6879	0.598918	0.789997	1.2e-07	1	C10AA HMG CoA reductase inhibitors [DG:DG01660]	3.87e-06
p6m	G	C10AB	1163	8	24538	140	-0.0373	0.9634	0.466349	1.99003	0.92	0	C10AB Fibrates	0.982
p6m	G	C10AX	1156	15	24333	345	-0.2887	0.7492	0.44198	1.27013	0.28	0	C10AX Other lipid modifying agents	0.522
p6m	G	D01AC	1122	49	24055	623	0.3393	1.404	1.03615	1.90233	0.029	-1	D01AC Imidazole and triazole derivatives	0.15
p6m	G	D01AE	1165	6	24570	108	0.0493	1.0505	0.457405	2.41272	0.91	0	D01AE Other antifungals for topical use	0.982
p6m	G	D01BA	1165	6	24623	55	0.8199	2.2703	0.970376	5.3114	0.059	0	D01BA Antifungals for systemic use	0.213
p6m	G	D02AC	1155	16	24235	443	-0.3831	0.6818	0.41044	1.13241	0.14	0	D02AC Soft paraffin and fat products	0.332
p6m	G	D02AE	1164	7	24549	129	-0.0198	0.9804	0.453564	2.11904	0.96	0	D02AE Carbamide products	0.982
p6m	G	D02AX	1070	101	23236	1442	0.2493	1.2831	1.0317	1.59576	0.025	-1	D02AX Other emollients and protectives	0.138
p6m	G	D05AX	1165	6	24521	157	-0.3775	0.6856	0.299975	1.56691	0.37	0	D05AX Other antipsoriatics for topical use	0.589
p6m	G	D06AX	1163	8	24488	190	-0.2773	0.7578	0.366347	1.56757	0.46	0	D06AX Other antibiotics for topical use	0.653
p6m	G	D07AA	1158	13	24472	206	0.2808	1.3242	0.74952	2.33967	0.33	0	D07AA Corticosteroids, weak (group I)	0.571
p6m	G	D07AB	1154	17	24491	187	0.6578	1.9305	1.16364	3.20258	0.011	-1	D07AB Corticosteroids, moderately potent (group II)	0.0761
p6m	G	D07AC	1138	33	24061	617	0.0586	1.0603	0.740196	1.51891	0.75	0	D07AC Corticosteroids, potent (group III)	0.853
p6m	G	D07AD	1161	10	24502	176	0.2351	1.265	0.663218	2.41289	0.48	0	D07AD Corticosteroids, very potent (group IV)	0.664
p6m	G	D07CA	1162	9	24600	78	0.7912	2.2059	1.09564	4.44138	0.027	-1	D07CA Corticosteroids, weak, combinations with antibiotics	0.145
p6m	G	D07CC	1158	13	24510	168	0.3876	1.4735	0.830587	2.61409	0.18	0	D07CC Corticosteroids, potent, combinations with antibiotics	0.383
p6m	G	D09AA	1166	5	24628	50	0.5543	1.7407	0.681521	4.44602	0.25	0	D09AA Medicated dressings with antiinfectives	0.483
p6m	G	D11AC	1166	5	24593	85	-0.0247	0.9756	0.390281	2.43862	0.96	0	D11AC Medicated shampoos	0.982
p6m	G	G01AF	1161	10	24518	160	0.2647	1.303	0.679002	2.50046	0.43	0	G01AF Imidazole derivatives	0.637
p6m	G	G03BA	1165	6	24603	75	0.1385	1.1485	0.488285	2.70153	0.75	0	G03BA 3-oxoandrosten (4) derivatives	0.853
p6m	G	G03CA	1141	30	23660	1018	-0.257	0.7734	0.530405	1.12758	0.18	0	G03CA Natural and semisynthetic estrogens, plain	0.383
p6m	G	G04BD	1139	32	23858	820	-0.3363	0.7144	0.496369	1.02826	0.07	0	G04BD Urinary antispasmodics	0.232
p6m	G	G04BE	1129	42	24017	661	0.0643	1.0664	0.769375	1.47807	0.7	0	G04BE Drugs used in erectile dysfunction	0.818
p6m	G	G04CA	1164	7	24570	108	0.0201	1.0203	0.46648	2.23145	0.96	0	G04CA Alpha-adrenoreceptor antagonists	0.982
p6m	G	G04CB	1140	31	23907	771	-0.3732	0.6885	0.474222	0.999622	0.05	1	G04CB Testosterone-5-alpha reductase inhibitors	0.189
p6m	G	H02AB	1065	106	23265	1413	0.4872	1.6277	1.31051	2.02159	1.1e-05	-1	H02AB Glucocorticoids	0.000183
p6m	G	H03AA	1098	73	22498	2180	-0.3764	0.6863	0.535987	0.87876	0.0028	1	H03AA Thyroid hormones	0.0245
p6m	G	J01AA	1068	103	23651	1027	0.779	2.1793	1.74898	2.7155	3.9e-12	-1	J01AA Tetracyclines [DG:DG01197]	3.24e-10
p6m	G	J01CA	1041	130	23388	1290	0.7641	2.1471	1.76397	2.61341	2.5e-14	-1	J01CA Penicillins with extended spectrum [DG:DG01780]	4.15e-12
p6m	G	J01CE	1163	8	24522	156	-0.0116	0.9884	0.481407	2.02947	0.97	0	J01CE Beta-lactamase sensitive penicillins [DG:DG01778]	0.982
p6m	G	J01CF	1107	64	23876	802	0.4289	1.5355	1.1757	2.00543	0.0016	-1	J01CF Beta-lactamase resistant penicillins [DG:DG01779]	0.0148
p6m	G	J01CR	1134	37	24230	448	0.4934	1.6379	1.1578	2.31696	0.0053	-1	J01CR Combinations of penicillins, incl. beta-lactamase inhibitors	0.044
p6m	G	J01DB	1159	12	24433	245	0.0243	1.0246	0.569051	1.84466	0.94	0	J01DB First-generation cephalosporins [DG:DG01774]	0.982
p6m	G	J01EA	1143	28	24269	409	0.2759	1.3177	0.887114	1.95731	0.17	0	J01EA Trimethoprim and derivatives [DG:DG01581]	0.376
p6m	G	J01EE	1166	5	24617	61	0.5093	1.6642	0.661564	4.18638	0.28	0	J01EE Combinations of sulfonamides and trimethoprim, incl. derivatives	0.522
p6m	G	J01FA	1129	42	24084	594	0.337	1.4007	1.01078	1.94116	0.043	-1	J01FA Macrolides [DG:DG01551]	0.182
p6m	G	J01FF	1166	5	24648	30	1.1131	3.0439	1.15852	7.99765	0.024	-1	J01FF Lincosamides [DG:DG01578]	0.137
p6m	G	J01MA	1159	12	24444	234	-0.0174	0.9828	0.545485	1.77065	0.95	0	J01MA Fluoroquinolones [DG:DG01549]	0.982
p6m	G	J01XE	1096	75	23368	1310	0.2195	1.2455	0.974976	1.59103	0.079	0	J01XE Nitrofuran derivatives	0.254
p6m	G	J02AC	1160	11	24527	151	0.5101	1.6654	0.895617	3.09686	0.11	0	J02AC Triazole derivatives	0.29
p6m	G	J05AB	1157	14	24483	195	0.4269	1.5325	0.880505	2.66744	0.13	0	J05AB Nucleosides and nucleotides excl. reverse transcriptase inhibitors [DG:DG02840]	0.317
p6m	G	L01BC	1166	5	24596	82	0.4164	1.5165	0.611079	3.76354	0.37	0	L01BC Pyrimidine analogues	0.589
p6m	G	L02AE	1162	9	24446	232	-0.2963	0.7435	0.378076	1.46229	0.39	0	L02AE Gonadotropin releasing hormone analogues	0.589
p6m	G	L02BG	1163	8	24377	301	-0.3484	0.7058	0.346661	1.43705	0.34	0	L02BG Aromatase inhibitors [DG:DG01596]	0.576
p6m	G	L04AA	1166	5	24618	60	0.4791	1.6146	0.639318	4.07762	0.31	0	L04AA Selective immunosuppressants	0.559
p6m	G	L04AX	1160	11	24374	304	-0.2768	0.7582	0.412648	1.3932	0.37	0	L04AX Other immunosuppressants	0.589
p6m	G	M01AB	1164	7	24564	114	0.242	1.2738	0.588725	2.75621	0.54	0	M01AB Acetic acid derivatives and related substances	0.7
p6m	G	M01AE	1128	43	23574	1104	-0.2234	0.7998	0.584864	1.09374	0.16	0	M01AE Propionic acid derivatives	0.364
p6m	G	M01AH	1165	6	24573	105	0.2244	1.2515	0.545763	2.86999	0.6	0	M01AH Coxibs	0.749
p6m	G	M02AA	1097	74	23533	1145	0.1885	1.2075	0.940527	1.55013	0.14	0	M02AA Antiinflammatory preparations, non-steroids for topical use	0.332
p6m	G	M03BX	1164	7	24556	122	0.0379	1.0386	0.479775	2.24837	0.92	0	M03BX Other centrally acting agents	0.982
p6m	G	M04AA	1124	47	23868	810	-0.0655	0.9366	0.686117	1.27843	0.68	0	M04AA Preparations inhibiting uric acid production	0.801
p6m	G	M04AC	1161	10	24542	136	0.2203	1.2465	0.648473	2.39589	0.51	0	M04AC Preparations with no effect on uric acid metabolism	0.688
p6m	G	M05BA	1126	45	23710	968	0.1198	1.1273	0.825412	1.53963	0.45	0	M05BA Bisphosphonates [DG:DG01600]	0.65
p6m	G	N01BB	1159	12	24495	183	0.1489	1.1605	0.63716	2.11376	0.63	0	N01BB Amides	0.775
p6m	G	N02AA	1095	76	23827	851	0.5472	1.7284	1.34443	2.22204	2e-05	-1	N02AA Natural opium alkaloids	0.000302
p6m	G	N02AB	1163	8	24579	99	0.3685	1.4455	0.693138	3.01467	0.33	0	N02AB Phenylpiperidine derivatives	0.571
p6m	G	N02AE	1150	21	24424	254	0.3713	1.4496	0.914456	2.29804	0.11	0	N02AE Oripavine derivatives	0.29
p6m	G	N02AJ	1083	88	22926	1752	-0.0499	0.9514	0.757629	1.19463	0.67	0	N02AJ Opioids in combination with non-opioid analgesics	0.8
p6m	G	N02AX	1142	29	23996	682	-0.3329	0.7168	0.488223	1.05252	0.089	0	N02AX Other opioids	0.259
p6m	G	N02BE	898	273	20209	4469	0.1659	1.1805	1.01637	1.37112	0.03	-1	N02BE Anilides	0.151
p6m	G	N02BG	1165	6	24623	55	0.7228	2.0603	0.87398	4.85669	0.099	0	N02BG Other analgesics and antipyretics	0.277
p6m	G	N02CC	1165	6	24430	248	-0.5655	0.5681	0.251317	1.284	0.17	0	N02CC Selective serotonin (5HT1) agonists [DG:DG01943]	0.376
p6m	G	N03AF	1161	10	24537	141	0.2707	1.3109	0.681639	2.52113	0.42	0	N03AF Carboxamide derivatives	0.628
p6m	G	N03AG	1164	7	24545	133	-0.395	0.6737	0.305299	1.4867	0.33	0	N03AG Fatty acid derivatives	0.571
p6m	G	N03AX	1057	114	22929	1749	0.1832	1.201	0.976502	1.47723	0.083	0	N03AX Other antiepileptics	0.254
p6m	G	N04BA	1153	18	24361	317	0.1625	1.1764	0.723964	1.91173	0.51	0	N04BA Dopa and dopa derivatives	0.688
p6m	G	N04BC	1158	13	24498	180	0.4364	1.5472	0.873864	2.73937	0.13	0	N04BC Dopamine agonists	0.317
p6m	G	N04BD	1165	6	24611	67	0.7124	2.0389	0.871667	4.76923	0.1	0	N04BD Monoamine oxidase B inhibitors	0.277
p6m	G	N05AB	1154	17	24403	275	0.2262	1.2538	0.760327	2.06747	0.38	0	N05AB Phenothiazines with piperazine structure	0.589
p6m	G	N05AD	1164	7	24638	40	1.1117	3.0397	1.3172	7.01452	0.0092	-1	N05AD Butyrophenone derivatives [DG:DG01940]	0.0664
p6m	G	N05AH	1163	8	24507	171	-0.2647	0.7674	0.371705	1.58453	0.47	0	N05AH Diazepines, oxazepines and thiazepines	0.656
p6m	G	N05AX	1153	18	24575	103	0.936	2.5498	1.49092	4.36066	0.00063	-1	N05AX Other antipsychotics	0.00615
p6m	G	N05BA	1131	40	24190	488	0.4665	1.5943	1.137	2.23562	0.0068	-1	N05BA Benzodiazepine derivatives [DG:DG01914]	0.0538
p6m	G	N05CD	1143	28	24525	153	1.2216	3.3927	2.21827	5.1888	1.8e-08	-1	N05CD Benzodiazepine derivatives	7.47e-07
p6m	G	N05CF	1144	27	24177	501	0.0525	1.0539	0.708024	1.5686	0.8	0	N05CF Benzodiazepine related drugs	0.896
p6m	G	N06AA	1104	67	23110	1568	-0.163	0.8496	0.656119	1.10006	0.22	0	N06AA Non-selective monoamine reuptake inhibitors [DG:DG01730]	0.44
p6m	G	N06AB	1069	102	22544	2134	-0.0725	0.9301	0.744709	1.16164	0.52	0	N06AB Selective serotonin reuptake inhibitors	0.696
p6m	G	N06AX	1095	76	23578	1100	0.2259	1.2535	0.971443	1.6174	0.082	0	N06AX Other antidepressants	0.254
p6m	G	N06DA	1145	26	24412	266	0.4753	1.6085	1.02998	2.51193	0.037	-1	N06DA Anticholinesterases	0.181
p6m	G	N06DX	1142	29	24510	168	1.1187	3.0608	1.99195	4.70325	3.3e-07	-1	N06DX Other anti-dementia drugs	7.83e-06
p6m	G	N07CA	1157	14	24447	231	0.1605	1.1741	0.678472	2.03165	0.57	0	N07CA Antivertigo preparations	0.728
p6m	G	P01AB	1162	9	24552	126	0.4077	1.5033	0.75615	2.98883	0.24	0	P01AB Nitroimidazole derivatives	0.469
p6m	G	P01BA	1162	9	24532	146	0.1905	1.2098	0.61039	2.39783	0.58	0	P01BA Aminoquinolines	0.735
p6m	G	P01BC	1147	24	24262	416	0.019	1.0191	0.6666	1.55811	0.93	0	P01BC Methanolquinolines	0.982
p6m	G	R01AD	1121	50	23293	1385	-0.3043	0.7376	0.550465	0.98837	0.042	1	R01AD Corticosteroids	0.182
p6m	G	R03AC	1037	134	22269	2409	0.1034	1.1089	0.893443	1.37632	0.35	0	R03AC Selective beta-2-adrenoreceptor agonists	0.587
p6m	G	R03AK	1097	74	23204	1474	-0.0118	0.9883	0.754591	1.29429	0.93	0	R03AK Adrenergics in combination with corticosteroids or other drugs, excl. anticholinergics	0.982
p6m	G	R03AL	1148	23	24394	284	0.4675	1.5959	1.01343	2.51324	0.044	-1	R03AL Adrenergics in combination with anticholinergics incl. triple combinations with corticosteroids	0.182
p6m	G	R03BA	1140	31	23889	789	-0.2016	0.8174	0.560092	1.19288	0.3	0	R03BA Glucocorticoids	0.547
p6m	G	R03BB	1145	26	24072	606	-0.2396	0.7869	0.515117	1.20221	0.27	0	R03BB Anticholinergics	0.515
p6m	G	R03DC	1163	8	24401	277	-0.7376	0.4783	0.232616	0.983284	0.045	1	R03DC Leukotriene receptor antagonists	0.182
p6m	G	R05CB	1149	22	24232	446	-0.0812	0.922	0.585734	1.45123	0.73	0	R05CB Mucolytics	0.847
p6m	G	R05DA	1124	47	23732	946	0.0128	1.0129	0.74847	1.37082	0.93	0	R05DA Opium alkaloids and derivatives	0.982
p6m	G	R06AB	1163	8	24588	90	0.5777	1.782	0.855522	3.71167	0.12	0	R06AB Substituted alkylamines	0.302
p6m	G	R06AD	1163	8	24593	85	0.4949	1.6404	0.783358	3.43504	0.19	0	R06AD Phenothiazine derivatives	0.394
p6m	G	R06AE	1099	72	23949	729	0.6918	1.9973	1.54427	2.58332	1.4e-07	-1	R06AE Piperazine derivatives	3.87e-06
p6m	G	R06AX	1137	34	23962	716	-0.086	0.9176	0.642941	1.30964	0.64	0	R06AX Other antihistamines for systemic use	0.781
p6m	G	S01AA	1152	19	24444	234	0.3856	1.4705	0.908696	2.37959	0.12	0	S01AA Antibiotics	0.302
p6m	G	S01BA	1166	5	24543	135	-0.2798	0.756	0.307175	1.86047	0.54	0	S01BA Corticosteroids, plain	0.7
p6m	G	S01EC	1162	9	24395	283	-0.4422	0.6426	0.328379	1.25766	0.2	0	S01EC Carbonic anhydrase inhibitors	0.405
p6m	G	S01ED	1163	8	24306	372	-0.865	0.421	0.207186	0.855608	0.017	1	S01ED Beta blocking agents	0.109
p6m	G	S01EE	1153	18	24070	608	-0.5705	0.5652	0.350845	0.910647	0.019	1	S01EE Prostaglandin analogues	0.113
p6m	G	S01GX	1161	10	24525	153	0.2017	1.2234	0.638092	2.34575	0.54	0	S01GX Other antiallergics	0.7
p6m	G	S01XA	1112	59	23187	1491	-0.2644	0.7676	0.583534	1.00984	0.059	0	S01XA Other ophthalmologicals	0.213
p6m	G	V03AE	1163	8	24628	50	0.6879	1.9895	0.883704	4.47918	0.097	0	V03AE Drugs for treatment of hyperkalemia and hyperphosphatemia	0.277
p6m	G	V06DC	1165	6	24636	42	0.7895	2.2023	0.909328	5.33363	0.08	0	V06DC Carbohydrates	0.254
p6m	G	V07AY	1119	52	23977	701	0.1216	1.1293	0.8309	1.53476	0.44	0	V07AY Other non-therapeutic auxiliary products	0.646
p6m	H	A02BA	141	6	24149	529	0.4724	1.6038	0.690943	3.72257	0.27	0	A02BA H2-receptor antagonists [DG:DG01481]	0.383
p6m	H	A02BC	93	54	16225	8453	-0.1886	0.8281	0.581037	1.1802	0.3	0	A02BC Proton pump inhibitors [DG:DG01646]	0.418
p6m	H	A02BX	139	8	23961	717	0.4518	1.5711	0.753692	3.27492	0.23	0	A02BX Other drugs for peptic ulcer and gastro-oesophageal reflux disease (GORD)	0.374
p6m	H	A03BB	131	16	24343	335	2.1221	8.3483	4.73197	14.7284	2.4e-13	-1	A03BB Belladonna alkaloids, semisynthetic, quaternary ammonium compounds	6.24e-12
p6m	H	A03FA	140	7	24429	249	1.4683	4.3419	1.9712	9.56354	0.00027	-1	A03FA Propulsives [DG:DG01763]	0.00105
p6m	H	A06AA	136	11	24148	530	0.879	2.4085	1.26463	4.587	0.0075	-1	A06AA Softeners, emollients	0.0225
p6m	H	A06AB	117	30	23942	736	1.4324	4.1889	2.68564	6.53372	2.7e-10	-1	A06AB Contact laxatives	5.27e-09
p6m	H	A06AD	112	35	22789	1889	0.8429	2.3231	1.5584	3.46294	3.5e-05	-1	A06AD Osmotically acting laxatives	0.00021
p6m	H	A07DA	141	6	24263	415	0.7061	2.0262	0.86564	4.74252	0.1	0	A07DA Antipropulsives	0.211
p6m	H	A10AB	133	14	23847	831	0.6923	1.9984	1.01136	3.94861	0.046	-1	A10AB Insulins and analogues for injection, fast-acting	0.109
p6m	H	A10AD	142	5	24491	187	0.8131	2.2549	0.840748	6.04767	0.11	0	A10AD Insulins and analogues for injection, intermediate- or long-acting combined with fast-acting	0.22
p6m	H	A10AE	141	6	24388	290	0.7653	2.1496	0.860311	5.37118	0.1	0	A10AE Insulins and analogues for injection, long-acting	0.211
p6m	H	A10BA	134	13	23005	1673	-0.481	0.6181	0.319313	1.19666	0.15	0	A10BA Biguanides [DG:DG01684]	0.266
p6m	H	A10BB	142	5	24143	535	-0.41	0.6636	0.251352	1.75219	0.41	0	A10BB Sulfonylureas	0.533
p6m	H	A10BH	142	5	24202	476	-0.3117	0.7322	0.277229	1.93381	0.53	0	A10BH Dipeptidyl peptidase 4 (DPP-4) inhibitors [DG:DG01601]	0.646
p6m	H	A11CC	139	8	24064	614	0.4685	1.5976	0.754271	3.38378	0.22	0	A11CC Vitamin D and analogues	0.365
p6m	H	A11DA	139	8	24435	243	1.5638	4.7769	2.22369	10.2617	6.1e-05	-1	A11DA Vitamin B1, plain	0.00034
p6m	H	A12AX	127	20	22109	2569	0.1445	1.1555	0.706544	1.88972	0.56	0	A12AX Calcium, combinations with vitamin D and/or other drugs	0.652
p6m	H	B01AC	113	34	21076	3602	0.0061	1.0061	0.660575	1.53229	0.98	0	B01AC Platelet aggregation inhibitors excl. heparin	0.98
p6m	H	B01AF	127	20	22795	1883	0.1151	1.1219	0.687967	1.82965	0.65	0	B01AF Direct factor Xa inhibitors	0.714
p6m	H	B03AA	131	16	23801	877	0.7636	2.146	1.24037	3.71295	0.0063	-1	B03AA Iron bivalent, oral preparations	0.0205
p6m	H	B03BA	141	6	24049	629	0.1872	1.2058	0.522837	2.78101	0.66	0	B03BA Vitamin B12 (cyanocobalamin and analogues)	0.715
p6m	H	B03BB	132	15	23838	840	0.769	2.1575	1.23351	3.77378	0.007	-1	B03BB Folic acid and derivatives	0.0218
p6m	H	C01DA	139	8	23709	969	-0.2903	0.748	0.345691	1.61852	0.46	0	C01DA Organic nitrates	0.588
p6m	H	C02CA	142	5	23968	710	-0.4245	0.6541	0.261937	1.63342	0.36	0	C02CA Alpha-adrenoreceptor antagonists	0.476
p6m	H	C03AA	140	7	23809	869	-0.0753	0.9275	0.424841	2.02484	0.85	0	C03AA Thiazides, plain [DG:DG01749]	0.872
p6m	H	C03BA	138	9	24096	582	0.7892	2.2016	1.09807	4.41422	0.026	-1	C03BA Sulfonamides, plain	0.0699
p6m	H	C03CA	127	20	23198	1480	0.183	1.2008	0.719054	2.00531	0.48	0	C03CA Sulfonamides, plain	0.594
p6m	H	C07AB	114	33	21023	3655	-0.0842	0.9192	0.600112	1.4081	0.7	0	C07AB Beta blocking agents, selective	0.738
p6m	H	C08CA	115	32	20581	4097	-0.1016	0.9034	0.59741	1.36622	0.63	0	C08CA Dihydropyridine derivatives [DG:DG01928]	0.712
p6m	H	C09AA	123	24	20738	3940	-0.4827	0.6171	0.390549	0.975107	0.039	1	C09AA ACE inhibitors, plain [DG:DG01501]	0.0975
p6m	H	C09CA	131	16	22211	2467	-0.3078	0.7351	0.429747	1.25735	0.26	0	C09CA Angiotensin II receptor blockers, plain [DG:DG01495]	0.376
p6m	H	C10AA	85	62	15971	8707	-0.3379	0.7133	0.502281	1.01288	0.059	0	C10AA HMG CoA reductase inhibitors [DG:DG01660]	0.135
p6m	H	D01AC	132	15	24055	623	1.0562	2.8755	1.63353	5.06159	0.00025	-1	D01AC Imidazole and triazole derivatives	0.00103
p6m	H	D02AX	119	28	23236	1442	0.8661	2.3776	1.53538	3.68184	0.0001	-1	D02AX Other emollients and protectives	0.000459
p6m	H	D07AC	141	6	24061	617	0.3022	1.3529	0.588126	3.11196	0.48	0	D07AC Corticosteroids, potent (group III)	0.594
p6m	H	G04BD	141	6	23858	820	-0.1983	0.8201	0.35521	1.89348	0.64	0	G04BD Urinary antispasmodics	0.713
p6m	H	G04BE	140	7	24017	661	0.4595	1.5833	0.722792	3.46844	0.25	0	G04BE Drugs used in erectile dysfunction	0.375
p6m	H	G04CA	142	5	24570	108	1.5619	4.7681	1.83463	12.392	0.0014	-1	G04CA Alpha-adrenoreceptor antagonists	0.00475
p6m	H	G04CB	142	5	23907	771	-0.6705	0.5115	0.205029	1.27596	0.15	0	G04CB Testosterone-5-alpha reductase inhibitors	0.266
p6m	H	H02AB	125	22	23265	1413	0.9775	2.6578	1.63016	4.33331	8.9e-05	-1	H02AB Glucocorticoids	0.000434
p6m	H	H03AA	129	18	22498	2180	0.3868	1.4723	0.873019	2.48281	0.15	0	H03AA Thyroid hormones	0.266
p6m	H	J01AA	128	19	23651	1027	1.1686	3.2175	1.92495	5.3781	8.3e-06	-1	J01AA Tetracyclines [DG:DG01197]	6.47e-05
p6m	H	J01CA	119	28	23388	1290	1.2207	3.3894	2.19181	5.24149	4.1e-08	-1	J01CA Penicillins with extended spectrum [DG:DG01780]	6.4e-07
p6m	H	J01CF	131	16	23876	802	0.9733	2.6466	1.53428	4.56546	0.00047	-1	J01CF Beta-lactamase resistant penicillins [DG:DG01779]	0.00167
p6m	H	J01CR	140	7	24230	448	0.8996	2.4585	1.12413	5.37691	0.024	-1	J01CR Combinations of penicillins, incl. beta-lactamase inhibitors	0.0669
p6m	H	J01EA	140	7	24269	409	0.5714	1.7707	0.791305	3.9621	0.16	0	J01EA Trimethoprim and derivatives [DG:DG01581]	0.277
p6m	H	J01FA	139	8	24084	594	0.6893	1.9923	0.947705	4.18833	0.069	0	J01FA Macrolides [DG:DG01551]	0.154
p6m	H	J01XE	129	18	23368	1310	0.6781	1.9701	1.17602	3.30035	0.01	-1	J01XE Nitrofuran derivatives	0.0289
p6m	H	M01AE	140	7	23574	1104	0.2377	1.2683	0.580779	2.76975	0.55	0	M01AE Propionic acid derivatives	0.652
p6m	H	M02AA	131	16	23533	1145	0.4247	1.5291	0.887685	2.63394	0.13	0	M02AA Antiinflammatory preparations, non-steroids for topical use	0.254
p6m	H	M04AA	139	8	23868	810	-0.0505	0.9508	0.450495	2.00658	0.9	0	M04AA Preparations inhibiting uric acid production	0.912
p6m	H	M05BA	135	12	23710	968	0.6481	1.912	1.03092	3.54604	0.04	-1	M05BA Bisphosphonates [DG:DG01600]	0.0975
p6m	H	N02AA	117	30	23827	851	1.8072	6.0933	3.94374	9.41452	3.9e-16	-1	N02AA Natural opium alkaloids	1.52e-14
p6m	H	N02AE	137	10	24424	254	1.4776	4.3824	2.18266	8.79901	3.3e-05	-1	N02AE Oripavine derivatives	0.00021
p6m	H	N02AJ	133	14	22926	1752	0.1388	1.1489	0.652794	2.02192	0.63	0	N02AJ Opioids in combination with non-opioid analgesics	0.712
p6m	H	N02BE	82	65	20209	4469	0.8337	2.3018	1.62305	3.26443	2.9e-06	-1	N02BE Anilides	2.83e-05
p6m	H	N03AX	119	28	22929	1749	0.9568	2.6033	1.68069	4.03233	1.8e-05	-1	N03AX Other antiepileptics	0.000128
p6m	H	N04BA	141	6	24361	317	0.6478	1.9113	0.812945	4.49346	0.14	0	N04BA Dopa and dopa derivatives	0.266
p6m	H	N05AD	141	6	24638	40	2.5603	12.9392	4.75085	35.2406	5.5e-07	-1	N05AD Butyrophenone derivatives [DG:DG01940]	7.15e-06
p6m	H	N05AX	140	7	24575	103	1.6849	5.3919	2.22028	13.094	0.0002	-1	N05AX Other antipsychotics	0.000867
p6m	H	N05BA	134	13	24190	488	1.3983	4.0483	2.19062	7.4815	8.1e-06	-1	N05BA Benzodiazepine derivatives [DG:DG01914]	6.47e-05
p6m	H	N05CD	125	22	24525	153	2.8162	16.7129	9.79881	28.5056	4.8e-25	-1	N05CD Benzodiazepine derivatives	3.74e-23
p6m	H	N06AA	141	6	23110	1568	-0.4887	0.6134	0.266836	1.4101	0.25	0	N06AA Non-selective monoamine reuptake inhibitors [DG:DG01730]	0.375
p6m	H	N06AB	131	16	22544	2134	0.2874	1.3329	0.762113	2.33135	0.31	0	N06AB Selective serotonin reuptake inhibitors	0.424
p6m	H	N06AX	134	13	23578	1100	0.5021	1.6521	0.894307	3.05204	0.11	0	N06AX Other antidepressants	0.22
p6m	H	N06DA	138	9	24412	266	0.3905	1.4777	0.657335	3.32194	0.34	0	N06DA Anticholinesterases	0.457
p6m	H	N06DX	134	13	24510	168	1.6322	5.1149	2.62402	9.97032	1.6e-06	-1	N06DX Other anti-dementia drugs	1.78e-05
p6m	H	R01AD	142	5	23293	1385	-0.5206	0.5941	0.24049	1.46785	0.26	0	R01AD Corticosteroids	0.376
p6m	H	R03AC	129	18	22269	2409	0.3589	1.4317	0.785338	2.61012	0.24	0	R03AC Selective beta-2-adrenoreceptor agonists	0.374
p6m	H	R03AK	138	9	23204	1474	0.2299	1.2584	0.583133	2.71571	0.56	0	R03AK Adrenergics in combination with corticosteroids or other drugs, excl. anticholinergics	0.652
p6m	H	R03AL	142	5	24394	284	0.6866	1.987	0.741669	5.32349	0.17	0	R03AL Adrenergics in combination with anticholinergics incl. triple combinations with corticosteroids	0.288
p6m	H	R05CB	141	6	24232	446	0.5351	1.7076	0.695578	4.19206	0.24	0	R05CB Mucolytics	0.374
p6m	H	R05DA	139	8	23732	946	0.1233	1.1313	0.544032	2.35232	0.74	0	R05DA Opium alkaloids and derivatives	0.77
p6m	H	R06AE	133	14	23949	729	1.1527	3.1666	1.78558	5.61572	8e-05	-1	R06AE Piperazine derivatives	0.000416
p6m	H	S01AA	139	8	24444	234	1.4093	4.0931	1.892	8.85472	0.00034	-1	S01AA Antibiotics	0.00126
p6m	H	S01XA	137	10	23187	1491	-0.146	0.8642	0.445478	1.67644	0.67	0	S01XA Other ophthalmologicals	0.716
p6m	H	V07AY	135	12	23977	701	0.6943	2.0024	1.03942	3.8575	0.038	-1	V07AY Other non-therapeutic auxiliary products	0.0975
p1yr	A	A01AB	1127	44	2243	64	0.0957	1.1004	0.725613	1.66877	0.65	0	A01AB Antiinfectives and antiseptics for local oral treatment	0.761
p1yr	A	A01AD	1155	16	2297	10	0.7907	2.205	0.957916	5.07555	0.063	0	A01AD Other agents for local oral treatment	0.211
p1yr	A	A02BA	1123	48	2271	36	0.6714	1.957	1.2257	3.12439	0.0049	-1	A02BA H2-receptor antagonists [DG:DG01481]	0.0383
p1yr	A	A02BC	769	402	1597	710	-0.2597	0.7713	0.650943	0.913908	0.0027	1	A02BC Proton pump inhibitors [DG:DG01646]	0.0277
p1yr	A	A02BX	1124	47	2226	81	-0.3041	0.7378	0.494649	1.10033	0.14	0	A02BX Other drugs for peptic ulcer and gastro-oesophageal reflux disease (GORD)	0.338
p1yr	A	A03AA	1155	16	2279	28	0.0517	1.0531	0.545284	2.03369	0.88	0	A03AA Synthetic anticholinergics, esters with tertiary amino group	0.908
p1yr	A	A03AX	1166	5	2295	12	-0.5292	0.5891	0.191992	1.80734	0.35	0	A03AX Other drugs for functional gastrointestinal disorders	0.552
p1yr	A	A03BB	1132	39	2277	30	0.645	1.906	1.14401	3.17555	0.013	-1	A03BB Belladonna alkaloids, semisynthetic, quaternary ammonium compounds	0.0666
p1yr	A	A03FA	1146	25	2301	6	1.8243	6.1983	2.41571	15.9036	0.00015	-1	A03FA Propulsives [DG:DG01763]	0.00205
p1yr	A	A06AA	1110	61	2278	29	0.8929	2.4422	1.52189	3.91868	0.00021	-1	A06AA Softeners, emollients	0.00265
p1yr	A	A06AB	1063	108	2250	57	0.738	2.0917	1.47037	2.97555	4.1e-05	-1	A06AB Contact laxatives	0.000943
p1yr	A	A06AC	1163	8	2299	8	0.4546	1.5755	0.57752	4.29839	0.38	0	A06AC Bulk-forming laxatives	0.561
p1yr	A	A06AD	982	189	2186	121	0.7492	2.1153	1.63103	2.74347	1.6e-08	-1	A06AD Osmotically acting laxatives	1.31e-06
p1yr	A	A06AG	1164	7	2300	7	0.3217	1.3795	0.450537	4.22341	0.57	0	A06AG Enemas	0.737
p1yr	A	A07AA	1144	27	2292	15	0.9205	2.5104	1.27933	4.92621	0.0075	-1	A07AA Antibiotics	0.0492
p1yr	A	A07DA	1132	39	2282	25	0.776	2.1728	1.2653	3.73079	0.0049	-1	A07DA Antipropulsives	0.0383
p1yr	A	A07EC	1153	18	2288	19	0.3702	1.448	0.719757	2.9131	0.3	0	A07EC Aminosalicylic acid and similar agents	0.507
p1yr	A	A08AB	1166	5	2302	5	0.6462	1.9083	0.527052	6.90909	0.33	0	A08AB Peripherally acting antiobesity products	0.531
p1yr	A	A10AB	1088	83	2247	60	0.271	1.3113	0.85988	1.99963	0.21	0	A10AB Insulins and analogues for injection, fast-acting	0.405
p1yr	A	A10AC	1160	11	2300	7	0.1057	1.1115	0.392558	3.14687	0.84	0	A10AC Insulins and analogues for injection, intermediate-acting	0.883
p1yr	A	A10AD	1144	27	2297	10	0.5107	1.6664	0.756227	3.67214	0.2	0	A10AD Insulins and analogues for injection, intermediate- or long-acting combined with fast-acting	0.405
p1yr	A	A10AE	1149	22	2297	10	0.5727	1.7731	0.773438	4.06482	0.18	0	A10AE Insulins and analogues for injection, long-acting	0.399
p1yr	A	A10BA	1046	125	2156	151	-0.3429	0.7097	0.509189	0.989161	0.043	1	A10BA Biguanides [DG:DG01684]	0.164
p1yr	A	A10BB	1135	36	2256	51	-0.5263	0.5908	0.357537	0.97624	0.04	1	A10BB Sulfonylureas	0.164
p1yr	A	A10BD	1165	6	2302	5	0.2165	1.2417	0.356708	4.32231	0.73	0	A10BD Combinations of oral blood glucose lowering drugs	0.837
p1yr	A	A10BG	1166	5	2302	5	-0.3353	0.7151	0.195123	2.62079	0.61	0	A10BG Thiazolidinediones [DG:DG01683]	0.758
p1yr	A	A10BH	1133	38	2266	41	-0.3241	0.7232	0.433215	1.20716	0.21	0	A10BH Dipeptidyl peptidase 4 (DPP-4) inhibitors [DG:DG01601]	0.405
p1yr	A	A10BJ	1164	7	2289	18	-0.8825	0.4137	0.156827	1.09154	0.075	0	A10BJ Glucagon-like peptide-1 receptor (GLP-1) analogues	0.237
p1yr	A	A10BK	1153	18	2274	33	-0.4243	0.6542	0.343551	1.24589	0.2	0	A10BK Sodium-glucose co-transporter 2 (SGLT2) inhibitors	0.405
p1yr	A	A11CC	1105	66	2245	62	0.2913	1.3382	0.907253	1.97394	0.14	0	A11CC Vitamin D and analogues	0.338
p1yr	A	A11DA	1137	34	2302	5	2.0962	8.1353	3.07413	21.5289	2.4e-05	-1	A11DA Vitamin B1, plain	0.000656
p1yr	A	A12AA	1164	7	2299	8	0.0135	1.0136	0.347922	2.95262	0.98	0	A12AA Calcium	0.99
p1yr	A	A12AX	1017	154	2151	156	0.3338	1.3963	1.07785	1.80882	0.011	-1	A12AX Calcium, combinations with vitamin D and/or other drugs	0.0622
p1yr	A	B01AA	1136	35	2279	28	0.3531	1.4235	0.83426	2.42904	0.2	0	B01AA Vitamin K antagonists	0.405
p1yr	A	B01AB	1163	8	2301	6	0.5428	1.7208	0.573806	5.16115	0.33	0	B01AB Heparin group	0.531
p1yr	A	B01AC	959	212	2068	239	-0.1524	0.8586	0.675029	1.09219	0.21	0	B01AC Platelet aggregation inhibitors excl. heparin	0.405
p1yr	A	B01AF	1069	102	2212	95	0.2787	1.3214	0.96799	1.80397	0.079	0	B01AF Direct factor Xa inhibitors	0.244
p1yr	A	B03AA	1084	87	2261	46	0.7901	2.2035	1.48185	3.27665	9.5e-05	-1	B03AA Iron bivalent, oral preparations	0.00142
p1yr	A	B03BA	1110	61	2239	68	0.0942	1.0988	0.74796	1.6143	0.63	0	B03BA Vitamin B12 (cyanocobalamin and analogues)	0.761
p1yr	A	B03BB	1093	78	2239	68	0.2724	1.3131	0.915191	1.88399	0.14	0	B03BB Folic acid and derivatives	0.338
p1yr	A	B05CB	1156	15	2300	7	0.7441	2.1045	0.834902	5.3046	0.12	0	B05CB Salt solutions	0.323
p1yr	A	C01AA	1157	14	2287	20	-0.5006	0.6062	0.291902	1.25866	0.18	0	C01AA Digitalis glycosides [DG:DG01697]	0.399
p1yr	A	C01DA	1089	82	2233	74	0.0514	1.0528	0.718715	1.54205	0.79	0	C01DA Organic nitrates	0.87
p1yr	A	C01EB	1163	8	2291	16	-0.8813	0.4142	0.165849	1.03468	0.059	0	C01EB Other cardiac preparations	0.206
p1yr	A	C02CA	1127	44	2260	47	-0.1274	0.8804	0.56112	1.38117	0.58	0	C02CA Alpha-adrenoreceptor antagonists	0.737
p1yr	A	C03AA	1123	48	2235	72	-0.2658	0.7666	0.511363	1.14929	0.2	0	C03AA Thiazides, plain [DG:DG01749]	0.405
p1yr	A	C03BA	1133	38	2269	38	0.2946	1.3426	0.825003	2.1847	0.24	0	C03BA Sulfonamides, plain	0.442
p1yr	A	C03CA	1048	123	2240	67	0.6195	1.858	1.32921	2.59728	0.00029	-1	C03CA Sulfonamides, plain	0.0034
p1yr	A	C03DA	1145	26	2286	21	0.243	1.2751	0.684587	2.37484	0.44	0	C03DA Aldosterone antagonists	0.627
p1yr	A	C05AX	1150	21	2280	27	0.0732	1.0759	0.575889	2.00999	0.82	0	C05AX Other agents for treatment of hemorrhoids and anal fissures for topical use	0.879
p1yr	A	C07AA	1154	17	2280	27	0.3864	1.4716	0.762413	2.84054	0.25	0	C07AA Beta blocking agents, non-selective	0.451
p1yr	A	C07AB	984	187	2098	209	0.0368	1.0375	0.812454	1.32477	0.77	0	C07AB Beta blocking agents, selective	0.853
p1yr	A	C07AG	1163	8	2302	5	0.5238	1.6884	0.505429	5.6402	0.4	0	C07AG Alpha and beta blocking agents	0.581
p1yr	A	C08CA	936	235	1961	346	-0.1618	0.8506	0.690429	1.0479	0.13	0	C08CA Dihydropyridine derivatives [DG:DG01928]	0.333
p1yr	A	C08DB	1161	10	2288	19	-0.5028	0.6048	0.270349	1.35328	0.22	0	C08DB Benzothiazepine derivatives	0.42
p1yr	A	C09AA	973	198	1982	325	-0.3287	0.7199	0.577441	0.897335	0.0035	1	C09AA ACE inhibitors, plain [DG:DG01501]	0.0338
p1yr	A	C09CA	1064	107	2127	180	-0.3732	0.6885	0.52142	0.909134	0.0085	1	C09CA Angiotensin II receptor blockers, plain [DG:DG01495]	0.0536
p1yr	A	C10AA	752	419	1586	721	-0.6446	0.5248	0.436787	0.630667	6e-12	1	C10AA HMG CoA reductase inhibitors [DG:DG01660]	9.84e-10
p1yr	A	C10AB	1162	9	2301	6	0.2588	1.2954	0.425397	3.94487	0.65	0	C10AB Fibrates	0.761
p1yr	A	C10AX	1154	17	2283	24	-0.2632	0.7686	0.393322	1.50204	0.44	0	C10AX Other lipid modifying agents	0.627
p1yr	A	D01AC	1081	90	2211	96	0.2831	1.3272	0.958221	1.8382	0.088	0	D01AC Imidazole and triazole derivatives	0.262
p1yr	A	D01AE	1154	17	2286	21	-0.0052	0.9948	0.493286	2.00613	0.99	0	D01AE Other antifungals for topical use	0.99
p1yr	A	D01BA	1162	9	2293	14	0.4235	1.5273	0.626595	3.72251	0.35	0	D01BA Antifungals for systemic use	0.552
p1yr	A	D02AC	1147	24	2271	36	-0.2488	0.7797	0.441118	1.37835	0.39	0	D02AC Soft paraffin and fat products	0.571
p1yr	A	D02AE	1162	9	2293	14	-0.1184	0.8883	0.358129	2.20332	0.8	0	D02AE Carbamide products	0.875
p1yr	A	D02AX	1017	154	2148	159	0.1901	1.2094	0.935191	1.56403	0.15	0	D02AX Other emollients and protectives	0.351
p1yr	A	D05AX	1157	14	2284	23	-0.0772	0.9258	0.455708	1.88064	0.83	0	D05AX Other antipsoriatics for topical use	0.883
p1yr	A	D06AX	1152	19	2279	28	0.0942	1.0988	0.587335	2.0555	0.77	0	D06AX Other antibiotics for topical use	0.853
p1yr	A	D07AA	1138	33	2281	26	0.7245	2.0638	1.1744	3.62669	0.012	-1	D07AA Corticosteroids, weak (group I)	0.0635
p1yr	A	D07AB	1139	32	2283	24	0.8421	2.3212	1.30962	4.11412	0.0039	-1	D07AB Corticosteroids, moderately potent (group II)	0.0355
p1yr	A	D07AC	1106	65	2227	80	0.2204	1.2466	0.86998	1.7863	0.23	0	D07AC Corticosteroids, potent (group III)	0.434
p1yr	A	D07AD	1150	21	2275	32	0.2252	1.2526	0.69526	2.25653	0.45	0	D07AD Corticosteroids, very potent (group IV)	0.634
p1yr	A	D07CA	1159	12	2297	10	0.6867	1.9871	0.79152	4.98914	0.14	0	D07CA Corticosteroids, weak, combinations with antibiotics	0.338
p1yr	A	D07CC	1141	30	2276	31	0.2057	1.2284	0.707939	2.1315	0.46	0	D07CC Corticosteroids, potent, combinations with antibiotics	0.634
p1yr	A	D07CD	1165	6	2296	11	-0.1584	0.8535	0.293849	2.47931	0.77	0	D07CD Corticosteroids, very potent, combinations with antibiotics	0.853
p1yr	A	D09AA	1158	13	2301	6	0.8513	2.3427	0.855629	6.4148	0.098	0	D09AA Medicated dressings with antiinfectives	0.272
p1yr	A	D11AC	1163	8	2293	14	-0.529	0.5892	0.228348	1.52036	0.27	0	D11AC Medicated shampoos	0.481
p1yr	A	G01AF	1149	22	2292	15	0.9157	2.4985	1.22207	5.1083	0.012	-1	G01AF Imidazole derivatives	0.0635
p1yr	A	G03BA	1165	6	2297	10	-0.4938	0.6103	0.205762	1.81008	0.37	0	G03BA 3-oxoandrosten (4) derivatives	0.552
p1yr	A	G03CA	1128	43	2184	123	0.0562	1.0578	0.721105	1.55171	0.77	0	G03CA Natural and semisynthetic estrogens, plain	0.853
p1yr	A	G03FB	1164	7	2288	19	0.6961	2.0059	0.816432	4.92803	0.13	0	G03FB Progestogens and estrogens, sequential preparations	0.333
p1yr	A	G04BD	1128	43	2235	72	-0.2973	0.7428	0.490127	1.12574	0.16	0	G04BD Urinary antispasmodics	0.364
p1yr	A	G04BE	1113	58	2227	80	0.1168	1.1239	0.773266	1.6336	0.54	0	G04BE Drugs used in erectile dysfunction	0.72
p1yr	A	G04CA	1163	8	2299	8	0.1288	1.1375	0.397774	3.25285	0.81	0	G04CA Alpha-adrenoreceptor antagonists	0.879
p1yr	A	G04CB	1134	37	2268	39	-0.2433	0.784	0.480553	1.27925	0.33	0	G04CB Testosterone-5-alpha reductase inhibitors	0.531
p1yr	A	H02AB	1018	153	2183	124	0.7335	2.0824	1.57882	2.74651	2.1e-07	-1	H02AB Glucocorticoids	1.15e-05
p1yr	A	H02BX	1162	9	2293	14	-0.0668	0.9354	0.385537	2.26931	0.88	0	H02BX Corticosteroids for systemic use, combinations	0.908
p1yr	A	H03AA	1096	75	2132	175	-0.3606	0.6972	0.513242	0.947197	0.021	1	H03AA Thyroid hormones	0.0957
p1yr	A	J01AA	1031	140	2175	132	0.5523	1.7373	1.32492	2.27791	6.5e-05	-1	J01AA Tetracyclines [DG:DG01197]	0.00115
p1yr	A	J01CA	957	214	2067	240	0.3603	1.4338	1.15376	1.78188	0.0011	-1	J01CA Penicillins with extended spectrum [DG:DG01780]	0.012
p1yr	A	J01CE	1158	13	2286	21	0.2816	1.3253	0.625994	2.80572	0.46	0	J01CE Beta-lactamase sensitive penicillins [DG:DG01778]	0.634
p1yr	A	J01CF	1055	116	2186	121	0.3922	1.4803	1.11182	1.9708	0.0072	-1	J01CF Beta-lactamase resistant penicillins [DG:DG01779]	0.0492
p1yr	A	J01CR	1109	62	2273	34	0.9211	2.512	1.59544	3.95498	7e-05	-1	J01CR Combinations of penicillins, incl. beta-lactamase inhibitors	0.00115
p1yr	A	J01DB	1151	20	2291	16	0.4628	1.5885	0.769283	3.28032	0.21	0	J01DB First-generation cephalosporins [DG:DG01774]	0.405
p1yr	A	J01EA	1131	40	2276	31	0.6548	1.9248	1.16039	3.19266	0.011	-1	J01EA Trimethoprim and derivatives [DG:DG01581]	0.0622
p1yr	A	J01FA	1102	69	2234	73	0.3792	1.4611	1.0148	2.10369	0.042	-1	J01FA Macrolides [DG:DG01551]	0.164
p1yr	A	J01MA	1152	19	2293	14	0.497	1.6438	0.785554	3.4398	0.19	0	J01MA Fluoroquinolones [DG:DG01549]	0.405
p1yr	A	J01XE	1047	124	2152	155	0.3207	1.3781	1.05141	1.80634	0.02	-1	J01XE Nitrofuran derivatives	0.0937
p1yr	A	J02AC	1151	20	2290	17	0.9048	2.4714	1.22586	4.98276	0.011	-1	J02AC Triazole derivatives	0.0622
p1yr	A	J05AB	1153	18	2280	27	0.3412	1.4066	0.747463	2.6471	0.29	0	J05AB Nucleosides and nucleotides excl. reverse transcriptase inhibitors [DG:DG02840]	0.501
p1yr	A	J07BB	1074	97	2201	106	0.3518	1.4216	1.04836	1.92765	0.024	-1	J07BB Influenza vaccines	0.106
p1yr	A	J07CA	1164	7	2289	18	-0.2307	0.794	0.309413	2.03753	0.63	0	J07CA Bacterial and viral vaccines, combined	0.761
p1yr	A	L01BC	1164	7	2302	5	0.9951	2.705	0.795042	9.20374	0.11	0	L01BC Pyrimidine analogues	0.301
p1yr	A	L02AE	1159	12	2301	6	0.4713	1.6021	0.569786	4.50488	0.37	0	L02AE Gonadotropin releasing hormone analogues	0.552
p1yr	A	L02BG	1161	10	2281	26	-0.1533	0.8579	0.39562	1.86016	0.7	0	L02BG Aromatase inhibitors [DG:DG01596]	0.814
p1yr	A	L04AX	1157	14	2281	26	-0.1817	0.8339	0.415896	1.67176	0.61	0	L04AX Other immunosuppressants	0.758
p1yr	A	M01AB	1160	11	2294	13	0.4585	1.5817	0.675883	3.70136	0.29	0	M01AB Acetic acid derivatives and related substances	0.501
p1yr	A	M01AE	1096	75	2155	152	-0.032	0.9685	0.71379	1.31415	0.84	0	M01AE Propionic acid derivatives	0.883
p1yr	A	M01AH	1163	8	2298	9	0.2867	1.332	0.490521	3.61728	0.57	0	M01AH Coxibs	0.737
p1yr	A	M02AA	1047	124	2162	145	0.0646	1.0668	0.812063	1.40132	0.64	0	M02AA Antiinflammatory preparations, non-steroids for topical use	0.761
p1yr	A	M03BX	1162	9	2302	5	1.1537	3.17	1.01289	9.92127	0.048	-1	M03BX Other centrally acting agents	0.175
p1yr	A	M04AA	1120	51	2239	68	-0.2407	0.7861	0.521491	1.18489	0.25	0	M04AA Preparations inhibiting uric acid production	0.451
p1yr	A	M04AC	1157	14	2285	22	-0.3854	0.6802	0.322159	1.43602	0.31	0	M04AC Preparations with no effect on uric acid metabolism	0.519
p1yr	A	M05BA	1109	62	2250	57	0.4698	1.5997	1.08184	2.36521	0.019	-1	M05BA Bisphosphonates [DG:DG01600]	0.0916
p1yr	A	N01BB	1145	26	2281	26	0.4938	1.6385	0.914306	2.93645	0.097	0	N01BB Amides	0.272
p1yr	A	N02AA	1086	85	2265	42	0.9539	2.5957	1.74384	3.86368	2.6e-06	-1	N02AA Natural opium alkaloids	8.53e-05
p1yr	A	N02AE	1146	25	2291	16	0.3125	1.3668	0.701777	2.66238	0.36	0	N02AE Oripavine derivatives	0.552
p1yr	A	N02AJ	1048	123	2117	190	0.0016	1.0016	0.774071	1.29589	0.99	0	N02AJ Opioids in combination with non-opioid analgesics	0.99
p1yr	A	N02AX	1129	42	2263	44	0.1332	1.1425	0.720666	1.81127	0.57	0	N02AX Other opioids	0.737
p1yr	A	N02BE	850	321	1914	393	0.05	1.0512	0.869116	1.27148	0.61	0	N02BE Anilides	0.758
p1yr	A	N02BG	1164	7	2300	7	0.3973	1.4878	0.487111	4.54384	0.49	0	N02BG Other analgesics and antipyretics	0.67
p1yr	A	N02CC	1160	11	2268	39	-0.2	0.8187	0.406413	1.64922	0.58	0	N02CC Selective serotonin (5HT1) agonists [DG:DG01943]	0.737
p1yr	A	N03AF	1161	10	2301	6	0.8835	2.4194	0.854757	6.84798	0.096	0	N03AF Carboxamide derivatives	0.272
p1yr	A	N03AG	1163	8	2297	10	0.0333	1.0339	0.364812	2.93008	0.95	0	N03AG Fatty acid derivatives	0.974
p1yr	A	N03AX	1035	136	2213	94	0.7331	2.0815	1.54616	2.80198	1.3e-06	-1	N03AX Other antiepileptics	5.33e-05
p1yr	A	N04BA	1153	18	2294	13	0.4783	1.6134	0.769173	3.38419	0.21	0	N04BA Dopa and dopa derivatives	0.405
p1yr	A	N04BC	1157	14	2296	11	0.5365	1.71	0.739138	3.95609	0.21	0	N04BC Dopamine agonists	0.405
p1yr	A	N05AB	1140	31	2285	22	0.87	2.3869	1.31632	4.32824	0.0042	-1	N05AB Phenothiazines with piperazine structure	0.0363
p1yr	A	N05AH	1162	9	2291	16	-0.2059	0.8139	0.336345	1.96941	0.65	0	N05AH Diazepines, oxazepines and thiazepines	0.761
p1yr	A	N05AX	1150	21	2294	13	0.6295	1.8767	0.894968	3.93534	0.096	0	N05AX Other antipsychotics	0.272
p1yr	A	N05BA	1112	59	2245	62	0.4825	1.6201	1.09508	2.39679	0.016	-1	N05BA Benzodiazepine derivatives [DG:DG01914]	0.0795
p1yr	A	N05CD	1139	32	2290	17	0.8559	2.3536	1.26143	4.39135	0.0072	-1	N05CD Benzodiazepine derivatives	0.0492
p1yr	A	N05CF	1133	38	2260	47	0.2762	1.3181	0.834836	2.08126	0.24	0	N05CF Benzodiazepine related drugs	0.442
p1yr	A	N06AA	1080	91	2172	135	-0.026	0.9744	0.718959	1.3205	0.87	0	N06AA Non-selective monoamine reuptake inhibitors [DG:DG01730]	0.908
p1yr	A	N06AB	1052	119	2082	225	-0.0512	0.9501	0.72731	1.24118	0.71	0	N06AB Selective serotonin reuptake inhibitors	0.82
p1yr	A	N06AX	1085	86	2217	90	0.3793	1.4613	1.04665	2.04011	0.026	-1	N06AX Other antidepressants	0.112
p1yr	A	N06DA	1143	28	2274	33	-0.0864	0.9172	0.531532	1.58286	0.76	0	N06DA Anticholinesterases	0.853
p1yr	A	N06DX	1141	30	2276	31	-0.0136	0.9865	0.565304	1.72139	0.96	0	N06DX Other anti-dementia drugs	0.978
p1yr	A	N07CA	1152	19	2275	32	-0.2862	0.7511	0.402142	1.40279	0.37	0	N07CA Antivertigo preparations	0.552
p1yr	A	P01AB	1157	14	2283	24	0.1678	1.1827	0.589463	2.37282	0.64	0	P01AB Nitroimidazole derivatives	0.761
p1yr	A	P01BA	1162	9	2297	10	0.2444	1.2769	0.480008	3.39666	0.62	0	P01BA Aminoquinolines	0.761
p1yr	A	P01BC	1142	29	2285	22	0.3052	1.3569	0.740163	2.48734	0.32	0	P01BC Methanolquinolines	0.53
p1yr	A	R01AD	1082	89	2147	160	-0.1578	0.854	0.6361	1.14659	0.29	0	R01AD Corticosteroids	0.501
p1yr	A	R03AC	988	183	2053	254	0.1222	1.13	0.87092	1.46603	0.36	0	R03AC Selective beta-2-adrenoreceptor agonists	0.552
p1yr	A	R03AK	1085	86	2167	140	-0.1272	0.8806	0.629845	1.23105	0.46	0	R03AK Adrenergics in combination with corticosteroids or other drugs, excl. anticholinergics	0.634
p1yr	A	R03AL	1146	25	2294	13	0.7524	2.1221	1.03197	4.36375	0.041	-1	R03AL Adrenergics in combination with anticholinergics incl. triple combinations with corticosteroids	0.164
p1yr	A	R03BA	1131	40	2201	106	-0.5765	0.5619	0.369014	0.855431	0.0072	1	R03BA Glucocorticoids	0.0492
p1yr	A	R03BB	1134	37	2271	36	0.1741	1.1902	0.696411	2.03385	0.52	0	R03BB Anticholinergics	0.699
p1yr	A	R03DC	1163	8	2287	20	-0.7805	0.4582	0.189559	1.10748	0.083	0	R03DC Leukotriene receptor antagonists	0.252
p1yr	A	R05CB	1145	26	2290	17	0.5213	1.6842	0.864185	3.28233	0.13	0	R05CB Mucolytics	0.333
p1yr	A	R05DA	1091	80	2219	88	0.3679	1.4447	1.03284	2.02096	0.032	-1	R05DA Opium alkaloids and derivatives	0.135
p1yr	A	R06AB	1161	10	2302	5	1.1347	3.1102	1.03173	9.37558	0.044	-1	R06AB Substituted alkylamines	0.164
p1yr	A	R06AD	1160	11	2301	6	1.0678	2.909	0.985117	8.59011	0.053	0	R06AD Phenothiazine derivatives	0.189
p1yr	A	R06AE	1083	88	2245	62	0.7489	2.1147	1.47488	3.03213	4.6e-05	-1	R06AE Piperazine derivatives	0.000943
p1yr	A	R06AX	1125	46	2234	73	-0.0476	0.9535	0.633447	1.43524	0.82	0	R06AX Other antihistamines for systemic use	0.879
p1yr	A	S01AA	1140	31	2281	26	0.5213	1.6842	0.94964	2.98683	0.075	0	S01AA Antibiotics	0.237
p1yr	A	S01BA	1163	8	2301	6	0.6124	1.8449	0.576071	5.908	0.3	0	S01BA Corticosteroids, plain	0.507
p1yr	A	S01EC	1161	10	2299	8	0.4617	1.5868	0.575225	4.377	0.37	0	S01EC Carbonic anhydrase inhibitors	0.552
p1yr	A	S01ED	1162	9	2287	20	-0.7658	0.465	0.200587	1.07784	0.074	0	S01ED Beta blocking agents	0.237
p1yr	A	S01EE	1150	21	2265	42	-0.5443	0.5802	0.328363	1.02538	0.061	0	S01EE Prostaglandin analogues	0.208
p1yr	A	S01GX	1158	13	2292	15	0.2311	1.26	0.556041	2.85501	0.58	0	S01GX Other antiallergics	0.737
p1yr	A	S01XA	1101	70	2209	98	-0.1199	0.887	0.62669	1.2554	0.5	0	S01XA Other ophthalmologicals	0.678
p1yr	A	S02CA	1166	5	2291	16	-0.76	0.4677	0.16283	1.34317	0.16	0	S02CA Corticosteroids and antiinfectives in combination	0.364
p1yr	A	V07AY	1095	76	2235	72	0.2789	1.3216	0.904421	1.93128	0.15	0	V07AY Other non-therapeutic auxiliary products	0.351
p1yr	B	A02BA	141	6	3253	78	0.233	1.2624	0.511569	3.11509	0.61	0	A02BA H2-receptor antagonists [DG:DG01481]	0.735
p1yr	B	A02BC	90	57	2276	1055	-0.0298	0.9706	0.668875	1.4085	0.88	0	A02BC Proton pump inhibitors [DG:DG01646]	0.922
p1yr	B	A02BX	137	10	3213	118	0.3889	1.4753	0.719649	3.02447	0.29	0	A02BX Other drugs for peptic ulcer and gastro-oesophageal reflux disease (GORD)	0.47
p1yr	B	A03BB	131	16	3278	53	1.5032	4.4959	2.31209	8.74235	9.4e-06	-1	A03BB Belladonna alkaloids, semisynthetic, quaternary ammonium compounds	0.000276
p1yr	B	A03FA	140	7	3307	24	1.5469	4.6971	1.74832	12.6195	0.0022	-1	A03FA Propulsives [DG:DG01763]	0.0215
p1yr	B	A06AA	136	11	3252	79	0.356	1.4277	0.713466	2.85681	0.31	0	A06AA Softeners, emollients	0.47
p1yr	B	A06AB	115	32	3198	133	0.96	2.6116	1.62783	4.19002	6.9e-05	-1	A06AB Contact laxatives	0.00127
p1yr	B	A06AD	103	44	3065	266	0.7723	2.1647	1.43679	3.26145	0.00022	-1	A06AD Osmotically acting laxatives	0.00323
p1yr	B	A07AA	142	5	3294	37	0.3523	1.4224	0.495775	4.08074	0.51	0	A07AA Antibiotics	0.66
p1yr	B	A07DA	140	7	3274	57	0.6689	1.9522	0.790143	4.82316	0.15	0	A07DA Antipropulsives	0.33
p1yr	B	A10AB	131	16	3204	127	0.6318	1.881	0.900899	3.92756	0.092	0	A10AB Insulins and analogues for injection, fast-acting	0.275
p1yr	B	A10AD	141	6	3300	31	0.6217	1.8621	0.639367	5.42344	0.25	0	A10AD Insulins and analogues for injection, intermediate- or long-acting combined with fast-acting	0.468
p1yr	B	A10AE	141	6	3305	26	0.7128	2.0397	0.670107	6.20874	0.21	0	A10AE Insulins and analogues for injection, long-acting	0.42
p1yr	B	A10BA	133	14	3069	262	-0.4014	0.6694	0.334459	1.33979	0.26	0	A10BA Biguanides [DG:DG01684]	0.47
p1yr	B	A10BB	141	6	3250	81	0.0286	1.029	0.391872	2.70195	0.95	0	A10BB Sulfonylureas	0.96
p1yr	B	A10BH	142	5	3257	74	-0.3478	0.7063	0.253164	1.97024	0.51	0	A10BH Dipeptidyl peptidase 4 (DPP-4) inhibitors [DG:DG01601]	0.66
p1yr	B	A11CC	134	13	3216	115	0.3615	1.4354	0.726566	2.8359	0.3	0	A11CC Vitamin D and analogues	0.47
p1yr	B	A11DA	138	9	3301	30	1.1328	3.1043	1.30791	7.3682	0.01	-1	A11DA Vitamin B1, plain	0.0677
p1yr	B	A12AX	122	25	3046	285	0.2564	1.2923	0.789962	2.11402	0.31	0	A12AX Calcium, combinations with vitamin D and/or other drugs	0.47
p1yr	B	B01AC	113	34	2914	417	-0.197	0.8212	0.519772	1.29749	0.4	0	B01AC Platelet aggregation inhibitors excl. heparin	0.55
p1yr	B	B01AF	126	21	3155	176	0.2814	1.325	0.78431	2.23851	0.29	0	B01AF Direct factor Xa inhibitors	0.47
p1yr	B	B03AA	130	17	3215	116	0.6043	1.8299	1.00623	3.32786	0.048	-1	B03AA Iron bivalent, oral preparations	0.201
p1yr	B	B03BA	141	6	3208	123	-0.4941	0.6101	0.253887	1.46628	0.27	0	B03BA Vitamin B12 (cyanocobalamin and analogues)	0.47
p1yr	B	B03BB	129	18	3203	128	0.5034	1.6543	0.926909	2.95235	0.088	0	B03BB Folic acid and derivatives	0.275
p1yr	B	B05CB	142	5	3314	17	0.861	2.3656	0.787565	7.10549	0.12	0	B05CB Salt solutions	0.285
p1yr	B	C01DA	138	9	3184	147	-0.4887	0.6134	0.280786	1.3402	0.22	0	C01DA Organic nitrates	0.43
p1yr	B	C02CA	142	5	3245	86	-0.3899	0.6771	0.258784	1.7717	0.43	0	C02CA Alpha-adrenoreceptor antagonists	0.582
p1yr	B	C03AA	139	8	3219	112	-0.07	0.9324	0.424965	2.04559	0.86	0	C03AA Thiazides, plain [DG:DG01749]	0.912
p1yr	B	C03BA	138	9	3264	67	0.6617	1.9381	0.882938	4.25427	0.099	0	C03BA Sulfonamides, plain	0.275
p1yr	B	C03CA	124	23	3164	167	0.1226	1.1304	0.663666	1.92543	0.65	0	C03CA Sulfonamides, plain	0.773
p1yr	B	C07AB	113	34	2969	362	0.1712	1.1867	0.751326	1.8745	0.46	0	C07AB Beta blocking agents, selective	0.613
p1yr	B	C08CA	114	33	2783	548	-0.1204	0.8866	0.571904	1.37436	0.59	0	C08CA Dihydropyridine derivatives [DG:DG01928]	0.721
p1yr	B	C09AA	120	27	2835	496	-0.2909	0.7476	0.466148	1.19885	0.23	0	C09AA ACE inhibitors, plain [DG:DG01501]	0.44
p1yr	B	C09CA	129	18	3062	269	-0.0654	0.9367	0.539106	1.62749	0.82	0	C09CA Angiotensin II receptor blockers, plain [DG:DG01495]	0.902
p1yr	B	C10AA	81	66	2257	1074	-0.2354	0.7902	0.544717	1.14636	0.21	0	C10AA HMG CoA reductase inhibitors [DG:DG01660]	0.42
p1yr	B	D01AC	127	20	3165	166	0.4578	1.5805	0.905334	2.75932	0.11	0	D01AC Imidazole and triazole derivatives	0.285
p1yr	B	D02AX	113	34	3052	279	0.4036	1.4972	0.95826	2.3392	0.076	0	D02AX Other emollients and protectives	0.268
p1yr	B	D07AA	140	7	3279	52	0.7095	2.033	0.825711	5.0054	0.12	0	D07AA Corticosteroids, weak (group I)	0.285
p1yr	B	D07AC	137	10	3196	135	0.1942	1.2143	0.597983	2.46576	0.59	0	D07AC Corticosteroids, potent (group III)	0.721
p1yr	B	D07CC	140	7	3277	54	0.4856	1.6251	0.658676	4.0096	0.29	0	D07CC Corticosteroids, potent, combinations with antibiotics	0.47
p1yr	B	D09AA	142	5	3317	14	1.2084	3.3482	1.06823	10.4943	0.038	-1	D09AA Medicated dressings with antiinfectives	0.167
p1yr	B	G04BD	141	6	3222	109	-0.4606	0.6309	0.262261	1.51762	0.3	0	G04BD Urinary antispasmodics	0.47
p1yr	B	G04BE	138	9	3202	129	0.5091	1.6638	0.775903	3.56793	0.19	0	G04BE Drugs used in erectile dysfunction	0.408
p1yr	B	G04CA	142	5	3320	11	1.6448	5.1798	1.4686	18.2696	0.011	-1	G04CA Alpha-adrenoreceptor antagonists	0.0691
p1yr	B	G04CB	142	5	3260	71	-0.8101	0.4448	0.168879	1.17157	0.1	0	G04CB Testosterone-5-alpha reductase inhibitors	0.275
p1yr	B	H02AB	121	26	3080	251	0.7293	2.0737	1.25483	3.42681	0.0044	-1	H02AB Glucocorticoids	0.0352
p1yr	B	H03AA	129	18	3099	232	0.6346	1.8863	1.05975	3.35762	0.031	-1	H03AA Thyroid hormones	0.156
p1yr	B	J01AA	126	21	3080	251	0.4314	1.5393	0.913886	2.59286	0.1	0	J01AA Tetracyclines [DG:DG01197]	0.275
p1yr	B	J01CA	114	33	2910	421	0.1939	1.214	0.782905	1.88256	0.39	0	J01CA Penicillins with extended spectrum [DG:DG01780]	0.545
p1yr	B	J01CF	123	24	3118	213	0.4378	1.5493	0.933892	2.57026	0.09	0	J01CF Beta-lactamase resistant penicillins [DG:DG01779]	0.275
p1yr	B	J01CR	139	8	3243	88	-0.0296	0.9709	0.436901	2.1575	0.94	0	J01CR Combinations of penicillins, incl. beta-lactamase inhibitors	0.96
p1yr	B	J01EA	137	10	3270	61	0.8218	2.2745	1.0732	4.8206	0.032	-1	J01EA Trimethoprim and derivatives [DG:DG01581]	0.156
p1yr	B	J01FA	136	11	3200	131	0.3663	1.4424	0.721785	2.88244	0.3	0	J01FA Macrolides [DG:DG01551]	0.47
p1yr	B	J01MA	142	5	3303	28	0.8399	2.316	0.790886	6.78227	0.13	0	J01MA Fluoroquinolones [DG:DG01549]	0.301
p1yr	B	J01XE	121	26	3078	253	0.533	1.704	1.05065	2.76352	0.031	-1	J01XE Nitrofuran derivatives	0.156
p1yr	B	J07BB	140	7	3135	196	-0.688	0.5026	0.224281	1.12626	0.095	0	J07BB Influenza vaccines	0.275
p1yr	B	M01AE	138	9	3113	218	0.0338	1.0344	0.495975	2.15728	0.93	0	M01AE Propionic acid derivatives	0.96
p1yr	B	M02AA	123	24	3086	245	0.2344	1.2641	0.772645	2.06826	0.35	0	M02AA Antiinflammatory preparations, non-steroids for topical use	0.513
p1yr	B	M04AA	139	8	3220	111	-0.0896	0.9143	0.408431	2.04674	0.83	0	M04AA Preparations inhibiting uric acid production	0.902
p1yr	B	M05BA	133	14	3226	105	0.7103	2.0345	1.07391	3.85434	0.029	-1	M05BA Bisphosphonates [DG:DG01600]	0.156
p1yr	B	N02AA	115	32	3236	95	1.6776	5.3525	3.26237	8.78185	3.1e-11	-1	N02AA Natural opium alkaloids	1.36e-09
p1yr	B	N02AE	137	10	3300	31	1.1861	3.2743	1.45551	7.36596	0.0041	-1	N02AE Oripavine derivatives	0.0352
p1yr	B	N02AJ	129	18	3036	295	0.1094	1.1156	0.644807	1.93007	0.7	0	N02AJ Opioids in combination with non-opioid analgesics	0.8
p1yr	B	N02AX	140	7	3252	79	0.4291	1.5358	0.643871	3.66335	0.33	0	N02AX Other opioids	0.492
p1yr	B	N02BE	76	71	2688	643	0.5802	1.7864	1.23467	2.58476	0.0021	-1	N02BE Anilides	0.0215
p1yr	B	N03AX	117	30	3131	200	0.9661	2.6276	1.63054	4.23427	7.2e-05	-1	N03AX Other antiepileptics	0.00127
p1yr	B	N04BA	141	6	3306	25	0.8787	2.4078	0.922713	6.28303	0.073	0	N04BA Dopa and dopa derivatives	0.268
p1yr	B	N05AX	140	7	3304	27	0.7559	2.1294	0.813516	5.57389	0.12	0	N05AX Other antipsychotics	0.285
p1yr	B	N05BA	130	17	3227	104	0.9841	2.6755	1.43219	4.99803	0.002	-1	N05BA Benzodiazepine derivatives [DG:DG01914]	0.0215
p1yr	B	N05CD	125	22	3304	27	2.3497	10.4825	5.39779	20.357	4e-12	-1	N05CD Benzodiazepine derivatives	3.52e-10
p1yr	B	N05CF	142	5	3251	80	0.2026	1.2246	0.465435	3.22213	0.68	0	N05CF Benzodiazepine related drugs	0.787
p1yr	B	N06AA	138	9	3114	217	-0.2216	0.8013	0.384176	1.67113	0.56	0	N06AA Non-selective monoamine reuptake inhibitors [DG:DG01730]	0.704
p1yr	B	N06AB	131	16	3003	328	0.081	1.0844	0.598255	1.96548	0.79	0	N06AB Selective serotonin reuptake inhibitors	0.88
p1yr	B	N06AX	132	15	3170	161	0.4579	1.5808	0.856021	2.91913	0.14	0	N06AX Other antidepressants	0.316
p1yr	B	N06DA	137	10	3280	51	0.4251	1.5297	0.713429	3.28007	0.28	0	N06DA Anticholinesterases	0.47
p1yr	B	N06DX	134	13	3283	48	0.7042	2.0221	0.979258	4.17569	0.057	0	N06DX Other anti-dementia drugs	0.228
p1yr	B	R01AD	141	6	3088	243	-0.807	0.4462	0.187582	1.06125	0.068	0	R01AD Corticosteroids	0.26
p1yr	B	R03AC	129	18	2912	419	-0.2867	0.7507	0.405742	1.38907	0.36	0	R03AC Selective beta-2-adrenoreceptor agonists	0.519
p1yr	B	R03AK	136	11	3116	215	0.1401	1.1504	0.541727	2.44286	0.71	0	R03AK Adrenergics in combination with corticosteroids or other drugs, excl. anticholinergics	0.801
p1yr	B	R03AL	142	5	3298	33	0.4914	1.6345	0.561028	4.76213	0.37	0	R03AL Adrenergics in combination with anticholinergics incl. triple combinations with corticosteroids	0.525
p1yr	B	R03BB	141	6	3264	67	0.3227	1.3809	0.503988	3.78359	0.53	0	R03BB Anticholinergics	0.676
p1yr	B	R05CB	141	6	3294	37	0.799	2.2233	0.833899	5.92741	0.11	0	R05CB Mucolytics	0.285
p1yr	B	R05DA	136	11	3174	157	0.0176	1.0178	0.512237	2.02222	0.96	0	R05DA Opium alkaloids and derivatives	0.96
p1yr	B	R06AE	130	17	3198	133	0.7828	2.1876	1.20693	3.96526	0.0099	-1	R06AE Piperazine derivatives	0.0677
p1yr	B	R06AX	141	6	3218	113	0.1965	1.2171	0.487356	3.03957	0.67	0	R06AX Other antihistamines for systemic use	0.786
p1yr	B	S01AA	138	9	3283	48	0.9012	2.4625	1.06966	5.66918	0.034	-1	S01AA Antibiotics	0.157
p1yr	B	S01XA	136	11	3174	157	0.0643	1.0664	0.535103	2.12539	0.85	0	S01XA Other ophthalmologicals	0.912
p1yr	B	V07AY	133	14	3197	134	0.4422	1.5561	0.780392	3.10271	0.21	0	V07AY Other non-therapeutic auxiliary products	0.42
p1yr	C	A01AB	1127	44	355496	7040	0.4307	1.5383	1.13345	2.08779	0.0057	-1	A01AB Antiinfectives and antiseptics for local oral treatment	0.0153
p1yr	C	A01AD	1155	16	361175	1361	0.8975	2.4535	1.48008	4.06706	0.0005	-1	A01AD Other agents for local oral treatment	0.00178
p1yr	C	A02BA	1123	48	356214	6322	0.411	1.5084	1.1195	2.0323	0.0069	-1	A02BA H2-receptor antagonists [DG:DG01481]	0.018
p1yr	C	A02BC	769	402	262319	100217	-0.1158	0.8906	0.7808	1.01587	0.085	0	A02BC Proton pump inhibitors [DG:DG01646]	0.144
p1yr	C	A02BX	1124	47	353969	8567	0.1278	1.1363	0.842273	1.53296	0.4	0	A02BX Other drugs for peptic ulcer and gastro-oesophageal reflux disease (GORD)	0.536
p1yr	C	A03AA	1155	16	358776	3760	0.0158	1.0159	0.616092	1.67522	0.95	0	A03AA Synthetic anticholinergics, esters with tertiary amino group	0.96
p1yr	C	A03AX	1166	5	360983	1553	-0.3695	0.6911	0.284505	1.67872	0.41	0	A03AX Other drugs for functional gastrointestinal disorders	0.542
p1yr	C	A03BB	1132	39	359752	2784	1.1025	3.0117	2.16581	4.18807	5.6e-11	-1	A03BB Belladonna alkaloids, semisynthetic, quaternary ammonium compounds	5.18e-10
p1yr	C	A03FA	1146	25	360895	1641	1.1804	3.2555	2.16462	4.89628	1.4e-08	-1	A03FA Propulsives [DG:DG01763]	9.96e-08
p1yr	C	A04AA	1166	5	362196	340	1.2114	3.3582	1.37326	8.2122	0.0079	-1	A04AA Serotonin (5HT3) antagonists	0.02
p1yr	C	A06AA	1110	61	358998	3538	1.1628	3.199	2.44086	4.19269	3.6e-17	-1	A06AA Softeners, emollients	6.05e-16
p1yr	C	A06AB	1063	108	357756	4780	1.3336	3.7947	3.05767	4.70936	1e-33	-1	A06AB Contact laxatives	9.25e-32
p1yr	C	A06AC	1163	8	360223	2313	-0.1374	0.8717	0.432914	1.75503	0.7	0	A06AC Bulk-forming laxatives	0.794
p1yr	C	A06AD	982	189	346220	16316	1.033	2.8094	2.38204	3.31351	1.3e-34	-1	A06AD Osmotically acting laxatives	2.41e-32
p1yr	C	A06AG	1164	7	362239	297	1.4702	4.3503	2.00716	9.42868	0.00019	-1	A06AG Enemas	0.000717
p1yr	C	A06AX	1166	5	361687	849	0.1568	1.1698	0.480341	2.84885	0.73	0	A06AX Other drugs for constipation	0.809
p1yr	C	A07AA	1144	27	360556	1980	1.0874	2.9665	2.00095	4.39809	6.2e-08	-1	A07AA Antibiotics	4.1e-07
p1yr	C	A07DA	1132	39	358871	3665	0.7687	2.157	1.55061	3.00044	5e-06	-1	A07DA Antipropulsives	2.5e-05
p1yr	C	A07EC	1153	18	359150	3386	0.2229	1.2497	0.780913	1.9999	0.35	0	A07EC Aminosalicylic acid and similar agents	0.487
p1yr	C	A08AB	1166	5	362177	359	0.7413	2.0986	0.856759	5.14053	0.1	0	A08AB Peripherally acting antiobesity products	0.162
p1yr	C	A09AB	1166	5	362395	141	1.5292	4.6143	1.84889	11.5161	0.001	-1	A09AB Acid preparations	0.00319
p1yr	C	A10AB	1088	83	353404	9132	0.087	1.0909	0.830152	1.43346	0.53	0	A10AB Insulins and analogues for injection, fast-acting	0.667
p1yr	C	A10AC	1160	11	361478	1058	0.0716	1.0742	0.579716	1.99043	0.82	0	A10AC Insulins and analogues for injection, intermediate-acting	0.872
p1yr	C	A10AD	1144	27	360968	1568	0.5244	1.6894	1.11772	2.55345	0.013	-1	A10AD Insulins and analogues for injection, intermediate- or long-acting combined with fast-acting	0.0308
p1yr	C	A10AE	1149	22	359792	2744	-0.0813	0.9219	0.588154	1.44506	0.72	0	A10AE Insulins and analogues for injection, long-acting	0.807
p1yr	C	A10BA	1046	125	341469	21067	-0.3754	0.687	0.543051	0.869088	0.0018	1	A10BA Biguanides [DG:DG01684]	0.0052
p1yr	C	A10BB	1135	36	356435	6101	-0.4196	0.6573	0.459134	0.940937	0.022	1	A10BB Sulfonylureas	0.0468
p1yr	C	A10BD	1165	6	362208	328	0.6939	2.0014	0.872315	4.592	0.1	0	A10BD Combinations of oral blood glucose lowering drugs	0.162
p1yr	C	A10BG	1166	5	361815	721	-0.1098	0.896	0.367324	2.18548	0.81	0	A10BG Thiazolidinediones [DG:DG01683]	0.866
p1yr	C	A10BH	1133	38	357107	5429	-0.1865	0.8298	0.585258	1.17664	0.29	0	A10BH Dipeptidyl peptidase 4 (DPP-4) inhibitors [DG:DG01601]	0.416
p1yr	C	A10BJ	1164	7	360899	1637	-0.8904	0.4105	0.192056	0.877336	0.022	1	A10BJ Glucagon-like peptide-1 receptor (GLP-1) analogues	0.0468
p1yr	C	A10BK	1153	18	359145	3391	-0.4053	0.6668	0.410769	1.08242	0.1	0	A10BK Sodium-glucose co-transporter 2 (SGLT2) inhibitors	0.162
p1yr	C	A11CC	1105	66	355167	7369	0.5651	1.7596	1.35777	2.28052	1.9e-05	-1	A11CC Vitamin D and analogues	8.37e-05
p1yr	C	A11DA	1137	34	361117	1419	1.3498	3.8566	2.67813	5.55353	4e-13	-1	A11DA Vitamin B1, plain	4.93e-12
p1yr	C	A11EX	1162	9	361734	802	0.3028	1.3537	0.682771	2.68373	0.39	0	A11EX Vitamin B-complex, other combinations	0.527
p1yr	C	A12AA	1164	7	361859	677	0.767	2.1532	1.00926	4.59374	0.047	-1	A12AA Calcium	0.0852
p1yr	C	A12AX	1017	154	331005	31531	0.29	1.3364	1.11733	1.59844	0.0015	-1	A12AX Calcium, combinations with vitamin D and/or other drugs	0.0044
p1yr	C	B01AA	1136	35	356643	5893	0.0809	1.0842	0.767627	1.53138	0.65	0	B01AA Vitamin K antagonists	0.766
p1yr	C	B01AB	1163	8	361883	653	1.0056	2.7334	1.34849	5.54077	0.0053	-1	B01AB Heparin group	0.0146
p1yr	C	B01AC	959	212	322231	40305	-0.1606	0.8516	0.713913	1.01582	0.074	0	B01AC Platelet aggregation inhibitors excl. heparin	0.127
p1yr	C	B01AF	1069	102	346861	15675	0.3556	1.427	1.15498	1.76315	0.00098	-1	B01AF Direct factor Xa inhibitors	0.00318
p1yr	C	B03AA	1084	87	355195	7341	0.6966	2.0069	1.58887	2.53481	5e-09	-1	B03AA Iron bivalent, oral preparations	3.85e-08
p1yr	C	B03BA	1110	61	354995	7541	0.437	1.5481	1.18472	2.0229	0.0014	-1	B03BA Vitamin B12 (cyanocobalamin and analogues)	0.00418
p1yr	C	B03BB	1093	78	354760	7776	0.7002	2.0141	1.58603	2.55769	9.3e-09	-1	B03BB Folic acid and derivatives	6.88e-08
p1yr	C	B05CB	1156	15	362082	454	1.7728	5.8871	3.47003	9.98777	4.9e-11	-1	B05CB Salt solutions	4.77e-10
p1yr	C	B05XA	1166	5	362120	416	0.2502	1.2843	0.514686	3.20481	0.59	0	B05XA Electrolyte solutions	0.718
p1yr	C	C01AA	1157	14	360421	2115	0.0786	1.0818	0.632862	1.84907	0.77	0	C01AA Digitalis glycosides [DG:DG01697]	0.838
p1yr	C	C01CA	1165	6	361609	927	0.6848	1.9834	0.88372	4.45143	0.097	0	C01CA Adrenergic and dopaminergic agents	0.162
p1yr	C	C01DA	1089	82	352805	9731	0.1548	1.1674	0.900795	1.51303	0.24	0	C01DA Organic nitrates	0.355
p1yr	C	C01DX	1160	11	361123	1413	-0.3256	0.7221	0.390061	1.3367	0.3	0	C01DX Other vasodilators used in cardiac diseases	0.427
p1yr	C	C01EB	1163	8	361474	1062	-0.203	0.8163	0.400121	1.66531	0.58	0	C01EB Other cardiac preparations	0.718
p1yr	C	C02CA	1127	44	354430	8106	-0.161	0.8513	0.623767	1.16177	0.31	0	C02CA Alpha-adrenoreceptor antagonists	0.438
p1yr	C	C03AA	1123	48	347792	14744	-0.3533	0.7024	0.521825	0.945336	0.02	1	C03AA Thiazides, plain [DG:DG01749]	0.0435
p1yr	C	C03BA	1133	38	354641	7895	0.0338	1.0344	0.744401	1.43733	0.84	0	C03BA Sulfonamides, plain	0.878
p1yr	C	C03CA	1048	123	352386	10150	0.6455	1.907	1.54715	2.35059	1.4e-09	-1	C03CA Sulfonamides, plain	1.18e-08
p1yr	C	C03DA	1145	26	359168	3368	0.0785	1.0817	0.722658	1.619	0.7	0	C03DA Aldosterone antagonists	0.794
p1yr	C	C05AX	1150	21	358881	3655	0.3092	1.3624	0.880545	2.10793	0.17	0	C05AX Other agents for treatment of hemorrhoids and anal fissures for topical use	0.258
p1yr	C	C07AA	1154	17	358057	4479	0.0814	1.0848	0.6697	1.75718	0.74	0	C07AA Beta blocking agents, non-selective	0.81
p1yr	C	C07AB	984	187	323369	39167	-0.2053	0.8144	0.680751	0.974388	0.025	1	C07AB Beta blocking agents, selective	0.0503
p1yr	C	C07AG	1163	8	362025	511	0.7897	2.2028	1.07996	4.49316	0.03	-1	C07AG Alpha and beta blocking agents	0.0584
p1yr	C	C08CA	936	235	302198	60338	-0.2073	0.8128	0.69646	0.948459	0.0085	1	C08CA Dihydropyridine derivatives [DG:DG01928]	0.0213
p1yr	C	C08DB	1161	10	359161	3375	-0.7835	0.4568	0.243239	0.857965	0.015	1	C08DB Benzothiazepine derivatives	0.0347
p1yr	C	C09AA	973	198	306151	56385	-0.4507	0.6372	0.540623	0.750923	7.6e-08	1	C09AA ACE inhibitors, plain [DG:DG01501]	4.54e-07
p1yr	C	C09CA	1064	107	331065	31471	-0.4616	0.6303	0.512191	0.775628	1.3e-05	1	C09CA Angiotensin II receptor blockers, plain [DG:DG01495]	6.33e-05
p1yr	C	C10AA	752	419	236230	126306	-0.7107	0.4913	0.427613	0.564441	1.1e-23	1	C10AA HMG CoA reductase inhibitors [DG:DG01660]	5.09e-22
p1yr	C	C10AB	1162	9	361021	1515	-0.0646	0.9375	0.482616	1.82095	0.85	0	C10AB Fibrates	0.883
p1yr	C	C10AC	1165	6	361845	691	0.7627	2.1441	0.953803	4.81976	0.065	0	C10AC Bile acid sequestrants	0.113
p1yr	C	C10AX	1154	17	358628	3908	-0.2839	0.7528	0.463079	1.22386	0.25	0	C10AX Other lipid modifying agents	0.364
p1yr	C	D01AC	1081	90	351419	11117	0.608	1.8368	1.47314	2.2903	6.6e-08	-1	D01AC Imidazole and triazole derivatives	4.21e-07
p1yr	C	D01AE	1154	17	360432	2104	0.6342	1.8855	1.15926	3.06668	0.011	-1	D01AE Other antifungals for topical use	0.0268
p1yr	C	D01BA	1162	9	361271	1265	0.7544	2.1263	1.09787	4.11793	0.025	-1	D01BA Antifungals for systemic use	0.0503
p1yr	C	D02AC	1147	24	356792	5744	-0.1112	0.8948	0.593702	1.34857	0.59	0	D02AC Soft paraffin and fat products	0.718
p1yr	C	D02AE	1162	9	360921	1615	0.0871	1.091	0.561851	2.11839	0.8	0	D02AE Carbamide products	0.865
p1yr	C	D02AX	1017	154	342604	19932	0.5325	1.7032	1.42636	2.03371	4e-09	-1	D02AX Other emollients and protectives	3.22e-08
p1yr	C	D05AX	1157	14	359178	3358	0.0026	1.0026	0.589026	1.70664	0.99	0	D05AX Other antipsoriatics for topical use	0.99
p1yr	C	D06AX	1152	19	359726	2810	0.3841	1.4682	0.920269	2.34245	0.11	0	D06AX Other antibiotics for topical use	0.177
p1yr	C	D07AA	1138	33	357861	4675	0.609	1.8386	1.29255	2.61549	0.00071	-1	D07AA Corticosteroids, weak (group I)	0.00239
p1yr	C	D07AB	1139	32	358369	4167	0.7023	2.0184	1.41316	2.88297	0.00011	-1	D07AB Corticosteroids, moderately potent (group II)	0.000433
p1yr	C	D07AC	1106	65	350168	12368	0.2913	1.3382	1.03851	1.72438	0.024	-1	D07AC Corticosteroids, potent (group III)	0.0499
p1yr	C	D07AD	1150	21	358328	4208	0.3458	1.4131	0.914498	2.18359	0.12	0	D07AD Corticosteroids, very potent (group IV)	0.187
p1yr	C	D07CA	1159	12	360902	1634	0.6558	1.9268	1.08579	3.41914	0.025	-1	D07CA Corticosteroids, weak, combinations with antibiotics	0.0503
p1yr	C	D07CC	1141	30	359438	3098	0.8162	2.2619	1.56367	3.27185	1.5e-05	-1	D07CC Corticosteroids, potent, combinations with antibiotics	6.94e-05
p1yr	C	D07CD	1165	6	361716	820	0.4779	1.6126	0.716645	3.62888	0.25	0	D07CD Corticosteroids, very potent, combinations with antibiotics	0.364
p1yr	C	D09AA	1158	13	362000	536	1.4988	4.4762	2.54459	7.8741	2e-07	-1	D09AA Medicated dressings with antiinfectives	1.12e-06
p1yr	C	D11AC	1163	8	361221	1315	0.191	1.2105	0.599524	2.44398	0.59	0	D11AC Medicated shampoos	0.718
p1yr	C	G01AF	1149	22	360487	2049	0.921	2.5119	1.62872	3.87405	3.1e-05	-1	G01AF Imidazole derivatives	0.00013
p1yr	C	G03BA	1165	6	361453	1083	-0.0858	0.9178	0.406658	2.07136	0.84	0	G03BA 3-oxoandrosten (4) derivatives	0.878
p1yr	C	G03CA	1128	43	342998	19538	-0.0638	0.9382	0.684875	1.2853	0.69	0	G03CA Natural and semisynthetic estrogens, plain	0.793
p1yr	C	G03FB	1164	7	361033	1503	0.8685	2.3834	1.12305	5.05829	0.024	-1	G03FB Progestogens and estrogens, sequential preparations	0.0499
p1yr	C	G04BD	1128	43	352538	9998	-0.1031	0.902	0.661728	1.22959	0.51	0	G04BD Urinary antispasmodics	0.651
p1yr	C	G04BE	1113	58	350579	11957	0.0116	1.0117	0.770384	1.32857	0.93	0	G04BE Drugs used in erectile dysfunction	0.956
p1yr	C	G04CA	1163	8	361233	1303	0.0857	1.0895	0.537984	2.20648	0.81	0	G04CA Alpha-adrenoreceptor antagonists	0.866
p1yr	C	G04CB	1134	37	354467	8069	-0.1375	0.8715	0.622399	1.22037	0.42	0	G04CB Testosterone-5-alpha reductase inhibitors	0.551
p1yr	C	H02AA	1165	6	362070	466	0.9289	2.5316	1.11358	5.75537	0.027	-1	H02AA Mineralocorticoids	0.0537
p1yr	C	H02AB	1018	153	344000	18536	0.7246	2.0639	1.71629	2.48185	1.3e-14	-1	H02AB Glucocorticoids	1.85e-13
p1yr	C	H02BX	1162	9	360830	1706	0.2763	1.3183	0.680286	2.5546	0.41	0	H02BX Corticosteroids for systemic use, combinations	0.542
p1yr	C	H03AA	1096	75	331117	31419	-0.4689	0.6257	0.491946	0.795868	0.00013	1	H03AA Thyroid hormones	0.000501
p1yr	C	J01AA	1031	140	347793	14743	0.8625	2.3692	1.96565	2.85549	1.4e-19	-1	J01AA Tetracyclines [DG:DG01197]	3.7e-18
p1yr	C	J01CA	957	214	338005	24531	0.8627	2.3695	2.03056	2.76511	6.5e-28	-1	J01CA Penicillins with extended spectrum [DG:DG01780]	4.01e-26
p1yr	C	J01CE	1158	13	360072	2464	0.3479	1.4161	0.815998	2.45742	0.22	0	J01CE Beta-lactamase sensitive penicillins [DG:DG01778]	0.328
p1yr	C	J01CF	1055	116	351015	11521	0.9416	2.564	2.10563	3.12219	7.3e-21	-1	J01CF Beta-lactamase resistant penicillins [DG:DG01779]	2.7e-19
p1yr	C	J01CR	1109	62	357974	4562	1.1812	3.2581	2.50298	4.2411	1.6e-18	-1	J01CR Combinations of penicillins, incl. beta-lactamase inhibitors	2.96e-17
p1yr	C	J01DB	1151	20	360384	2152	0.7495	2.116	1.34888	3.31929	0.0011	-1	J01DB First-generation cephalosporins [DG:DG01774]	0.00339
p1yr	C	J01EA	1131	40	358106	4430	0.7779	2.1769	1.57647	3.00596	2.3e-06	-1	J01EA Trimethoprim and derivatives [DG:DG01581]	1.22e-05
p1yr	C	J01EE	1165	6	362154	382	1.1442	3.1399	1.38208	7.13347	0.0063	-1	J01EE Combinations of sulfonamides and trimethoprim, incl. derivatives	0.0166
p1yr	C	J01FA	1102	69	354259	8277	0.6902	1.9942	1.55051	2.5648	7.6e-08	-1	J01FA Macrolides [DG:DG01551]	4.54e-07
p1yr	C	J01FF	1161	10	362233	303	1.8287	6.2255	3.22166	12.03	5.3e-08	-1	J01FF Lincosamides [DG:DG01578]	3.63e-07
p1yr	C	J01MA	1152	19	360304	2232	0.5654	1.7601	1.10922	2.79291	0.016	-1	J01MA Fluoroquinolones [DG:DG01549]	0.0365
p1yr	C	J01XE	1047	124	345641	16895	0.8108	2.2497	1.8553	2.72797	1.7e-16	-1	J01XE Nitrofuran derivatives	2.62e-15
p1yr	C	J01XX	1165	6	361866	670	0.6943	2.0022	0.886141	4.52409	0.095	0	J01XX Other antibacterials	0.16
p1yr	C	J02AC	1151	20	360621	1915	0.996	2.7075	1.72482	4.24993	1.5e-05	-1	J02AC Triazole derivatives	6.94e-05
p1yr	C	J05AB	1153	18	359344	3192	0.5619	1.7541	1.09652	2.8059	0.019	-1	J05AB Nucleosides and nucleotides excl. reverse transcriptase inhibitors [DG:DG02840]	0.0418
p1yr	C	J07BB	1074	97	352217	10319	0.9724	2.6443	2.14112	3.26573	1.7e-19	-1	J07BB Influenza vaccines	3.93e-18
p1yr	C	J07CA	1164	7	359633	2903	-0.1585	0.8534	0.405049	1.79807	0.68	0	J07CA Bacterial and viral vaccines, combined	0.791
p1yr	C	L01BC	1164	7	360286	2250	0.0062	1.0062	0.476659	2.12402	0.99	0	L01BC Pyrimidine analogues	0.99
p1yr	C	L02AE	1159	12	360871	1665	0.4649	1.5918	0.891372	2.84261	0.12	0	L02AE Gonadotropin releasing hormone analogues	0.187
p1yr	C	L02BG	1161	10	358984	3552	0.0224	1.0226	0.545324	1.91762	0.94	0	L02BG Aromatase inhibitors [DG:DG01596]	0.96
p1yr	C	L04AA	1165	6	361891	645	0.6493	1.9142	0.846021	4.33125	0.12	0	L04AA Selective immunosuppressants	0.187
p1yr	C	L04AX	1157	14	358557	3979	-0.1359	0.873	0.513351	1.48449	0.62	0	L04AX Other immunosuppressants	0.74
p1yr	C	M01AB	1160	11	361015	1521	0.6451	1.9062	1.04694	3.47056	0.035	-1	M01AB Acetic acid derivatives and related substances	0.0654
p1yr	C	M01AE	1096	75	343881	18655	0.1588	1.1721	0.925483	1.48436	0.19	0	M01AE Propionic acid derivatives	0.286
p1yr	C	M01AH	1163	8	361338	1198	0.5521	1.737	0.861569	3.5018	0.12	0	M01AH Coxibs	0.187
p1yr	C	M02AA	1047	124	345107	17429	0.4226	1.5259	1.2569	1.85241	1.9e-05	-1	M02AA Antiinflammatory preparations, non-steroids for topical use	8.37e-05
p1yr	C	M03BA	1166	5	362394	142	1.855	6.3917	2.50178	16.3298	0.00011	-1	M03BA Carbamic acid esters	0.000433
p1yr	C	M03BX	1162	9	361672	864	0.6846	1.9831	1.01537	3.87304	0.045	-1	M03BX Other centrally acting agents	0.0824
p1yr	C	M04AA	1120	51	353130	9406	-0.1127	0.8934	0.667103	1.19655	0.45	0	M04AA Preparations inhibiting uric acid production	0.586
p1yr	C	M04AC	1157	14	360498	2038	0.233	1.2624	0.738726	2.15731	0.39	0	M04AC Preparations with no effect on uric acid metabolism	0.527
p1yr	C	M05BA	1109	62	350013	12523	0.4641	1.5906	1.22189	2.07068	0.00056	-1	M05BA Bisphosphonates [DG:DG01600]	0.00192
p1yr	C	N01BB	1145	26	359005	3531	0.6172	1.8537	1.24999	2.74898	0.0021	-1	N01BB Amides	0.00589
p1yr	C	N02AA	1086	85	357411	5125	1.104	3.0161	2.37573	3.82913	1.2e-19	-1	N02AA Natural opium alkaloids	3.7e-18
p1yr	C	N02AB	1160	11	362023	513	1.0403	2.83	1.52624	5.2476	0.00096	-1	N02AB Phenylpiperidine derivatives	0.00317
p1yr	C	N02AE	1146	25	360786	1750	0.7693	2.1583	1.42813	3.2618	0.00026	-1	N02AE Oripavine derivatives	0.000962
p1yr	C	N02AJ	1048	123	341192	21344	0.2128	1.2371	1.01983	1.50068	0.031	-1	N02AJ Opioids in combination with non-opioid analgesics	0.0597
p1yr	C	N02AX	1129	42	356117	6419	0.099	1.104	0.802225	1.51943	0.54	0	N02AX Other opioids	0.675
p1yr	C	N02BE	850	321	317807	44729	0.4878	1.6288	1.41209	1.87866	2.1e-11	-1	N02BE Anilides	2.16e-10
p1yr	C	N02BG	1164	7	362012	524	0.9114	2.4877	1.1652	5.31116	0.018	-1	N02BG Other analgesics and antipyretics	0.0406
p1yr	C	N02CC	1160	11	357817	4719	-0.1527	0.8584	0.471481	1.56292	0.62	0	N02CC Selective serotonin (5HT1) agonists [DG:DG01943]	0.74
p1yr	C	N03AF	1161	10	361029	1507	0.3656	1.4414	0.76512	2.71533	0.26	0	N03AF Carboxamide derivatives	0.376
p1yr	C	N03AG	1163	8	361339	1197	0.0217	1.0219	0.498208	2.09617	0.95	0	N03AG Fatty acid derivatives	0.96
p1yr	C	N03AX	1035	136	347291	15245	0.5948	1.8126	1.49716	2.19449	1.1e-09	-1	N03AX Other antiepileptics	9.69e-09
p1yr	C	N04BA	1153	18	360253	2283	0.5913	1.8063	1.12228	2.90734	0.015	-1	N04BA Dopa and dopa derivatives	0.0347
p1yr	C	N04BC	1157	14	360940	1596	0.6804	1.9747	1.15239	3.38388	0.013	-1	N04BC Dopamine agonists	0.0308
p1yr	C	N04BD	1165	6	361995	541	1.1113	3.0383	1.34118	6.88279	0.0077	-1	N04BD Monoamine oxidase B inhibitors	0.0198
p1yr	C	N05AB	1140	31	358025	4511	0.5991	1.8206	1.26761	2.61473	0.0012	-1	N05AB Phenothiazines with piperazine structure	0.00364
p1yr	C	N05AD	1164	7	362333	203	1.6859	5.3975	2.45687	11.858	2.7e-05	-1	N05AD Butyrophenone derivatives [DG:DG01940]	0.000116
p1yr	C	N05AH	1162	9	361142	1394	0.1113	1.1177	0.5722	2.18331	0.74	0	N05AH Diazepines, oxazepines and thiazepines	0.81
p1yr	C	N05AX	1150	21	361785	751	1.2821	3.6042	2.2498	5.77395	9.7e-08	-1	N05AX Other antipsychotics	5.61e-07
p1yr	C	N05BA	1112	59	357409	5127	0.9919	2.6963	2.05273	3.54161	1e-12	-1	N05BA Benzodiazepine derivatives [DG:DG01914]	1.16e-11
p1yr	C	N05CD	1139	32	361314	1222	1.6734	5.33	3.68227	7.71514	7.4e-19	-1	N05CD Benzodiazepine derivatives	1.52e-17
p1yr	C	N05CF	1133	38	356861	5675	0.4693	1.5989	1.1487	2.22568	0.0054	-1	N05CF Benzodiazepine related drugs	0.0147
p1yr	C	N05CH	1165	6	362027	509	0.8357	2.3065	1.01746	5.22843	0.045	-1	N05CH Melatonin receptor agonists	0.0824
p1yr	C	N06AA	1080	91	342733	19803	0.0825	1.086	0.870607	1.35478	0.46	0	N06AA Non-selective monoamine reuptake inhibitors [DG:DG01730]	0.595
p1yr	C	N06AB	1052	119	335816	26720	0.0499	1.0512	0.853538	1.29455	0.64	0	N06AB Selective serotonin reuptake inhibitors	0.759
p1yr	C	N06AX	1085	86	352261	10275	0.4764	1.6103	1.26842	2.04441	9.1e-05	-1	N06AX Other antidepressants	0.000374
p1yr	C	N06DA	1143	28	360574	1962	0.7543	2.1262	1.38728	3.25874	0.00053	-1	N06DA Anticholinesterases	0.00185
p1yr	C	N06DX	1141	30	361619	917	1.5917	4.9119	3.21702	7.49977	1.7e-13	-1	N06DX Other anti-dementia drugs	2.25e-12
p1yr	C	N07CA	1152	19	358759	3777	0.0813	1.0847	0.685465	1.71637	0.73	0	N07CA Antivertigo preparations	0.809
p1yr	C	P01AB	1157	14	361021	1515	0.8876	2.4293	1.42553	4.1398	0.0011	-1	P01AB Nitroimidazole derivatives	0.00339
p1yr	C	P01BA	1162	9	360780	1756	0.2148	1.2396	0.639267	2.40358	0.53	0	P01BA Aminoquinolines	0.667
p1yr	C	P01BC	1142	29	358458	4078	0.1806	1.1979	0.820523	1.74895	0.35	0	P01BC Methanolquinolines	0.487
p1yr	C	P03AC	1166	5	362246	290	1.186	3.2741	1.30699	8.2018	0.011	-1	P03AC Pyrethrines, incl. synthetic compounds	0.0268
p1yr	C	R01AD	1082	89	339238	23298	-0.0246	0.9757	0.782657	1.21628	0.83	0	R01AD Corticosteroids	0.877
p1yr	C	R03AC	988	183	327371	35165	0.214	1.2387	1.01597	1.51017	0.034	-1	R03AC Selective beta-2-adrenoreceptor agonists	0.0642
p1yr	C	R03AK	1085	86	343623	18913	-0.0656	0.9365	0.726389	1.20748	0.61	0	R03AK Adrenergics in combination with corticosteroids or other drugs, excl. anticholinergics	0.738
p1yr	C	R03AL	1146	25	359726	2810	0.4057	1.5003	0.981879	2.2924	0.061	0	R03AL Adrenergics in combination with anticholinergics incl. triple combinations with corticosteroids	0.107
p1yr	C	R03BA	1131	40	348901	13635	-0.244	0.7835	0.562665	1.09101	0.15	0	R03BA Glucocorticoids	0.231
p1yr	C	R03BB	1134	37	356896	5640	0.0729	1.0756	0.749403	1.5437	0.69	0	R03BB Anticholinergics	0.793
p1yr	C	R03DC	1163	8	359268	3268	-0.7954	0.4514	0.222267	0.916807	0.028	1	R03DC Leukotriene receptor antagonists	0.0551
p1yr	C	R05CB	1145	26	359106	3430	0.1915	1.2111	0.801404	1.83023	0.36	0	R05CB Mucolytics	0.493
p1yr	C	R05DA	1091	80	351751	10785	0.5572	1.7458	1.38398	2.2023	2.6e-06	-1	R05DA Opium alkaloids and derivatives	1.34e-05
p1yr	C	R06AB	1161	10	361557	979	0.6428	1.9017	1.00575	3.59588	0.048	-1	R06AB Substituted alkylamines	0.0862
p1yr	C	R06AD	1160	11	361475	1061	0.7233	2.0612	1.12752	3.76802	0.019	-1	R06AD Phenothiazine derivatives	0.0418
p1yr	C	R06AE	1083	88	353920	8616	0.8119	2.2523	1.79653	2.82363	1.9e-12	-1	R06AE Piperazine derivatives	2.07e-11
p1yr	C	R06AX	1125	46	352363	10173	0.0555	1.0571	0.781921	1.42909	0.72	0	R06AX Other antihistamines for systemic use	0.807
p1yr	C	S01AA	1140	31	358596	3940	0.6557	1.9264	1.34052	2.76838	0.00039	-1	S01AA Antibiotics	0.00141
p1yr	C	S01BA	1163	8	360858	1678	0.0527	1.0542	0.522553	2.12659	0.88	0	S01BA Corticosteroids, plain	0.909
p1yr	C	S01EC	1161	10	359379	3157	-0.2923	0.7465	0.398988	1.39685	0.36	0	S01EC Carbonic anhydrase inhibitors	0.493
p1yr	C	S01ED	1162	9	357813	4723	-0.7113	0.491	0.254046	0.948942	0.034	1	S01ED Beta blocking agents	0.0642
p1yr	C	S01EE	1150	21	354810	7726	-0.4153	0.6602	0.42742	1.01965	0.061	0	S01EE Prostaglandin analogues	0.107
p1yr	C	S01GX	1158	13	360283	2253	0.1959	1.2164	0.698583	2.11821	0.49	0	S01GX Other antiallergics	0.63
p1yr	C	S01XA	1101	70	342750	19786	-0.2281	0.796	0.620722	1.02083	0.072	0	S01XA Other ophthalmologicals	0.124
p1yr	C	S02CA	1166	5	361513	1023	0.1974	1.2183	0.503185	2.94962	0.66	0	S02CA Corticosteroids and antiinfectives in combination	0.773
p1yr	C	V03AE	1162	9	362419	117	1.9086	6.7435	3.08841	14.7243	1.7e-06	-1	V03AE Drugs for treatment of hyperkalemia and hyperphosphatemia	9.25e-06
p1yr	C	V06DC	1162	9	362231	305	1.1093	3.0322	1.49967	6.13075	0.002	-1	V06DC Carbohydrates	0.00569
p1yr	C	V07AY	1095	76	352318	10218	0.1807	1.1981	0.929312	1.54463	0.16	0	V07AY Other non-therapeutic auxiliary products	0.245
p1yr	D	A02BA	141	6	356214	6322	0.1564	1.1693	0.503197	2.71693	0.72	0	A02BA H2-receptor antagonists [DG:DG01481]	0.745
p1yr	D	A02BC	90	57	262319	100217	-0.1755	0.839	0.587685	1.1979	0.33	0	A02BC Proton pump inhibitors [DG:DG01646]	0.432
p1yr	D	A02BX	137	10	353969	8567	0.4923	1.6361	0.842582	3.17707	0.15	0	A02BX Other drugs for peptic ulcer and gastro-oesophageal reflux disease (GORD)	0.226
p1yr	D	A03BB	131	16	359752	2784	2.2886	9.8608	5.71171	17.0239	2.1e-16	-1	A03BB Belladonna alkaloids, semisynthetic, quaternary ammonium compounds	4.67e-15
p1yr	D	A03FA	140	7	360895	1641	2.1102	8.2503	3.78812	17.9686	1.1e-07	-1	A03FA Propulsives [DG:DG01763]	8.16e-07
p1yr	D	A06AA	136	11	358998	3538	1.1673	3.2133	1.70068	6.07119	0.00032	-1	A06AA Softeners, emollients	0.00102
p1yr	D	A06AB	115	32	357756	4780	1.9276	6.8731	4.45265	10.6094	3.2e-18	-1	A06AB Contact laxatives	9.49e-17
p1yr	D	A06AD	103	44	346220	16316	1.3953	4.0362	2.78196	5.85594	2e-13	-1	A06AD Osmotically acting laxatives	3.56e-12
p1yr	D	A07AA	142	5	360556	1980	1.4171	4.125	1.65481	10.2826	0.0024	-1	A07AA Antibiotics	0.00647
p1yr	D	A07DA	140	7	358871	3665	0.9316	2.5385	1.16042	5.55306	0.02	-1	A07DA Antipropulsives	0.0405
p1yr	D	A10AB	131	16	353404	9132	0.5063	1.6591	0.851349	3.23341	0.14	0	A10AB Insulins and analogues for injection, fast-acting	0.223
p1yr	D	A10AD	141	6	360968	1568	0.9759	2.6536	1.07617	6.54323	0.034	-1	A10AD Insulins and analogues for injection, intermediate- or long-acting combined with fast-acting	0.0658
p1yr	D	A10AE	141	6	359792	2744	0.5383	1.7131	0.687065	4.27143	0.25	0	A10AE Insulins and analogues for injection, long-acting	0.353
p1yr	D	A10BA	133	14	341469	21067	-0.8062	0.4466	0.232961	0.856021	0.015	1	A10BA Biguanides [DG:DG01684]	0.0318
p1yr	D	A10BB	141	6	356435	6101	-0.3646	0.6945	0.287126	1.67972	0.42	0	A10BB Sulfonylureas	0.498
p1yr	D	A10BH	142	5	357107	5429	-0.4456	0.6404	0.247596	1.65644	0.36	0	A10BH Dipeptidyl peptidase 4 (DPP-4) inhibitors [DG:DG01601]	0.451
p1yr	D	A11CC	134	13	355167	7369	0.9593	2.6099	1.43712	4.73959	0.0016	-1	A11CC Vitamin D and analogues	0.00445
p1yr	D	A11DA	138	9	361117	1419	2.0072	7.4422	3.57822	15.4786	7.8e-08	-1	A11DA Vitamin B1, plain	6.94e-07
p1yr	D	A12AX	122	25	331005	31531	0.3518	1.4216	0.904068	2.23537	0.13	0	A12AX Calcium, combinations with vitamin D and/or other drugs	0.218
p1yr	D	B01AC	113	34	322231	40305	-0.2772	0.7579	0.493809	1.16319	0.2	0	B01AC Platelet aggregation inhibitors excl. heparin	0.287
p1yr	D	B01AF	126	21	346861	15675	0.361	1.4348	0.890711	2.31123	0.14	0	B01AF Direct factor Xa inhibitors	0.223
p1yr	D	B03AA	130	17	355195	7341	0.8986	2.4561	1.43364	4.20792	0.0011	-1	B03AA Iron bivalent, oral preparations	0.00338
p1yr	D	B03BA	141	6	354995	7541	-0.0814	0.9218	0.399631	2.12617	0.85	0	B03BA Vitamin B12 (cyanocobalamin and analogues)	0.86
p1yr	D	B03BB	129	18	354760	7776	1.1128	3.0429	1.82667	5.06906	1.9e-05	-1	B03BB Folic acid and derivatives	7.35e-05
p1yr	D	B05CB	142	5	362082	454	2.3248	10.2249	4.05086	25.8089	8.6e-07	-1	B05CB Salt solutions	4.5e-06
p1yr	D	C01DA	138	9	352805	9731	-0.4247	0.654	0.311168	1.37455	0.26	0	C01DA Organic nitrates	0.362
p1yr	D	C02CA	142	5	354430	8106	-0.6179	0.5391	0.217864	1.33397	0.18	0	C02CA Alpha-adrenoreceptor antagonists	0.267
p1yr	D	C03AA	139	8	347792	14744	-0.3918	0.6759	0.326081	1.40082	0.29	0	C03AA Thiazides, plain [DG:DG01749]	0.397
p1yr	D	C03BA	138	9	354641	7895	0.5466	1.7274	0.869048	3.43343	0.12	0	C03BA Sulfonamides, plain	0.209
p1yr	D	C03CA	124	23	352386	10150	0.529	1.6973	1.03511	2.78309	0.036	-1	C03CA Sulfonamides, plain	0.0682
p1yr	D	C07AB	113	34	323369	39167	-0.1617	0.8507	0.554711	1.30459	0.46	0	C07AB Beta blocking agents, selective	0.529
p1yr	D	C08CA	114	33	302198	60338	-0.4182	0.6582	0.437869	0.989516	0.044	1	C08CA Dihydropyridine derivatives [DG:DG01928]	0.0816
p1yr	D	C09AA	120	27	306151	56385	-0.6402	0.5272	0.340608	0.815963	0.0041	1	C09AA ACE inhibitors, plain [DG:DG01501]	0.0101
p1yr	D	C09CA	129	18	331065	31471	-0.385	0.6805	0.408622	1.13315	0.14	0	C09CA Angiotensin II receptor blockers, plain [DG:DG01495]	0.223
p1yr	D	C10AA	81	66	236230	126306	-0.7815	0.4577	0.320891	0.652908	1.6e-05	1	C10AA HMG CoA reductase inhibitors [DG:DG01660]	6.47e-05
p1yr	D	D01AC	127	20	351419	11117	1.0778	2.9382	1.80943	4.77105	1.3e-05	-1	D01AC Imidazole and triazole derivatives	5.51e-05
p1yr	D	D02AX	113	34	342604	19932	0.9346	2.5462	1.70665	3.79878	4.7e-06	-1	D02AX Other emollients and protectives	2.09e-05
p1yr	D	D07AA	140	7	357861	4675	1.0236	2.7831	1.28128	6.04535	0.0097	-1	D07AA Corticosteroids, weak (group I)	0.0221
p1yr	D	D07AC	137	10	350168	12368	0.3298	1.3907	0.726773	2.66105	0.32	0	D07AC Corticosteroids, potent (group III)	0.425
p1yr	D	D07CC	140	7	359438	3098	1.2513	3.495	1.61048	7.58466	0.0015	-1	D07CC Corticosteroids, potent, combinations with antibiotics	0.00431
p1yr	D	D09AA	142	5	362000	536	2.3922	10.9379	4.3837	27.2915	2.9e-07	-1	D09AA Medicated dressings with antiinfectives	1.72e-06
p1yr	D	G04BD	141	6	352538	9998	-0.3051	0.7371	0.321167	1.69161	0.47	0	G04BD Urinary antispasmodics	0.529
p1yr	D	G04BE	138	9	350579	11957	0.245	1.2777	0.638562	2.55647	0.49	0	G04BE Drugs used in erectile dysfunction	0.538
p1yr	D	G04CA	142	5	361233	1303	1.3368	3.807	1.52613	9.49649	0.0042	-1	G04CA Alpha-adrenoreceptor antagonists	0.0101
p1yr	D	G04CB	142	5	354467	8069	-0.6688	0.5123	0.207021	1.26792	0.15	0	G04CB Testosterone-5-alpha reductase inhibitors	0.226
p1yr	D	H02AB	121	26	344000	18536	0.9803	2.6653	1.68698	4.21085	2.7e-05	-1	H02AB Glucocorticoids	0.0001
p1yr	D	H03AA	129	18	331117	31419	0.2322	1.2614	0.750791	2.11935	0.38	0	H03AA Thyroid hormones	0.457
p1yr	D	J01AA	126	21	347793	14743	0.9408	2.562	1.5742	4.16981	0.00015	-1	J01AA Tetracyclines [DG:DG01197]	0.000513
p1yr	D	J01CA	114	33	338005	24531	0.9618	2.6164	1.75036	3.91086	2.7e-06	-1	J01CA Penicillins with extended spectrum [DG:DG01780]	1.34e-05
p1yr	D	J01CF	123	24	351015	11521	1.2931	3.6441	2.32103	5.72123	1.9e-08	-1	J01CF Beta-lactamase resistant penicillins [DG:DG01779]	2.11e-07
p1yr	D	J01CR	139	8	357974	4562	1.0741	2.9274	1.4156	6.05384	0.0038	-1	J01CR Combinations of penicillins, incl. beta-lactamase inhibitors	0.00995
p1yr	D	J01EA	137	10	358106	4430	1.0999	3.0038	1.54454	5.84166	0.0012	-1	J01EA Trimethoprim and derivatives [DG:DG01581]	0.00356
p1yr	D	J01FA	136	11	354259	8277	0.926	2.5244	1.34331	4.74379	0.004	-1	J01FA Macrolides [DG:DG01551]	0.0101
p1yr	D	J01MA	142	5	360304	2232	1.1177	3.0577	1.22758	7.61623	0.016	-1	J01MA Fluoroquinolones [DG:DG01549]	0.0331
p1yr	D	J01XE	121	26	345641	16895	1.2049	3.3365	2.14087	5.19977	1e-07	-1	J01XE Nitrofuran derivatives	8.09e-07
p1yr	D	J07BB	140	7	352217	10319	0.1978	1.2187	0.566101	2.62362	0.61	0	J07BB Influenza vaccines	0.654
p1yr	D	M01AE	138	9	343881	18655	0.3207	1.3781	0.697488	2.72282	0.36	0	M01AE Propionic acid derivatives	0.451
p1yr	D	M02AA	123	24	345107	17429	0.5934	1.8101	1.14934	2.85087	0.011	-1	M02AA Antiinflammatory preparations, non-steroids for topical use	0.0245
p1yr	D	M04AA	139	8	353130	9406	-0.1642	0.8485	0.404786	1.77873	0.66	0	M04AA Preparations inhibiting uric acid production	0.691
p1yr	D	M05BA	133	14	350013	12523	0.8168	2.2632	1.27529	4.01655	0.0053	-1	M05BA Bisphosphonates [DG:DG01600]	0.0124
p1yr	D	N02AA	115	32	357411	5125	2.2771	9.7486	6.33641	14.9982	3.8e-25	-1	N02AA Natural opium alkaloids	1.69e-23
p1yr	D	N02AE	137	10	360786	1750	1.7253	5.6143	2.85239	11.0506	5.9e-07	-1	N02AE Oripavine derivatives	3.28e-06
p1yr	D	N02AJ	129	18	341192	21344	0.2319	1.261	0.760201	2.09186	0.37	0	N02AJ Opioids in combination with non-opioid analgesics	0.451
p1yr	D	N02AX	140	7	356117	6419	0.377	1.4579	0.662936	3.20627	0.35	0	N02AX Other opioids	0.451
p1yr	D	N02BE	76	71	317807	44729	1.083	2.9536	2.07672	4.20059	1.7e-09	-1	N02BE Anilides	2.16e-08
p1yr	D	N03AX	117	30	347291	15245	1.1514	3.1626	2.05669	4.86302	1.6e-07	-1	N03AX Other antiepileptics	1.1e-06
p1yr	D	N04BA	141	6	360253	2283	0.9953	2.7055	1.16331	6.29215	0.021	-1	N04BA Dopa and dopa derivatives	0.0415
p1yr	D	N05AD	141	6	362333	203	2.737	15.4406	5.87744	40.564	2.8e-08	-1	N05AD Butyrophenone derivatives [DG:DG01940]	2.77e-07
p1yr	D	N05AX	140	7	361785	751	1.889	6.6128	2.71898	16.0962	3.1e-05	-1	N05AX Other antipsychotics	0.00011
p1yr	D	N05BA	130	17	357409	5127	1.7224	5.5981	3.2495	9.64412	5.4e-10	-1	N05BA Benzodiazepine derivatives [DG:DG01914]	8.01e-09
p1yr	D	N05CD	125	22	361314	1222	3.0352	20.805	12.6666	34.1725	4.1e-33	-1	N05CD Benzodiazepine derivatives	3.65e-31
p1yr	D	N05CF	142	5	356861	5675	0.3385	1.4028	0.56489	3.48349	0.47	0	N05CF Benzodiazepine related drugs	0.529
p1yr	D	N06AA	138	9	342733	19803	-0.1612	0.8511	0.428339	1.69121	0.65	0	N06AA Non-selective monoamine reuptake inhibitors [DG:DG01730]	0.689
p1yr	D	N06AB	131	16	335816	26720	0.2604	1.2974	0.73805	2.28062	0.37	0	N06AB Selective serotonin reuptake inhibitors	0.451
p1yr	D	N06AX	132	15	352261	10275	0.7289	2.0728	1.16114	3.70028	0.014	-1	N06AX Other antidepressants	0.0304
p1yr	D	N06DA	137	10	360574	1962	0.5682	1.7651	0.808688	3.85282	0.15	0	N06DA Anticholinesterases	0.226
p1yr	D	N06DX	134	13	361619	917	1.847	6.3409	3.15036	12.7628	2.3e-07	-1	N06DX Other anti-dementia drugs	1.46e-06
p1yr	D	R01AD	141	6	339238	23298	-0.7055	0.4939	0.216875	1.12455	0.093	0	R01AD Corticosteroids	0.166
p1yr	D	R03AC	129	18	327371	35165	0.0031	1.0031	0.548767	1.83371	0.99	0	R03AC Selective beta-2-adrenoreceptor agonists	0.99
p1yr	D	R03AK	136	11	343623	18913	0.2912	1.338	0.649877	2.75469	0.43	0	R03AK Adrenergics in combination with corticosteroids or other drugs, excl. anticholinergics	0.504
p1yr	D	R03AL	142	5	359726	2810	0.4936	1.6383	0.624444	4.29802	0.32	0	R03AL Adrenergics in combination with anticholinergics incl. triple combinations with corticosteroids	0.425
p1yr	D	R03BB	141	6	356896	5640	0.1545	1.1671	0.475126	2.86686	0.74	0	R03BB Anticholinergics	0.757
p1yr	D	R05CB	141	6	359106	3430	0.5892	1.8025	0.746699	4.35113	0.19	0	R05CB Mucolytics	0.277
p1yr	D	R05DA	136	11	351751	10785	0.478	1.6129	0.864066	3.01076	0.13	0	R05DA Opium alkaloids and derivatives	0.218
p1yr	D	R06AE	130	17	353920	8616	1.2412	3.4599	2.05267	5.83191	3.2e-06	-1	R06AE Piperazine derivatives	1.5e-05
p1yr	D	R06AX	141	6	352363	10173	0.2277	1.2557	0.547216	2.88152	0.59	0	R06AX Other antihistamines for systemic use	0.64
p1yr	D	S01AA	138	9	358596	3940	1.2776	3.5879	1.79674	7.16451	0.00029	-1	S01AA Antibiotics	0.000956
p1yr	D	S01XA	136	11	342750	19786	-0.2182	0.804	0.429632	1.50459	0.49	0	S01XA Other ophthalmologicals	0.538
p1yr	D	V07AY	133	14	352318	10218	0.6191	1.8573	1.00839	3.42095	0.047	-1	V07AY Other non-therapeutic auxiliary products	0.0854
p1yr	E	A01AB	3370	108	355496	7040	0.396	1.4858	1.22304	1.80508	6.7e-05	-1	A01AB Antiinfectives and antiseptics for local oral treatment	0.000368
p1yr	E	A01AD	3452	26	361175	1361	0.5422	1.7197	1.15955	2.5505	0.007	-1	A01AD Other agents for local oral treatment	0.0239
p1yr	E	A02BA	3394	84	356214	6322	0.1682	1.1832	0.947366	1.47764	0.14	0	A02BA H2-receptor antagonists [DG:DG01481]	0.276
p1yr	E	A02BC	2366	1112	262319	100217	0.1112	1.1177	1.03408	1.20802	0.005	-1	A02BC Proton pump inhibitors [DG:DG01646]	0.0179
p1yr	E	A02BX	3350	128	353969	8567	0.3604	1.4339	1.19529	1.72025	0.0001	-1	A02BX Other drugs for peptic ulcer and gastro-oesophageal reflux disease (GORD)	0.000536
p1yr	E	A03AA	3434	44	358776	3760	0.1021	1.1074	0.81883	1.49779	0.51	0	A03AA Synthetic anticholinergics, esters with tertiary amino group	0.687
p1yr	E	A03AX	3461	17	360983	1553	-0.0076	0.9924	0.612511	1.60785	0.97	0	A03AX Other drugs for functional gastrointestinal disorders	0.983
p1yr	E	A03BB	3409	69	359752	2784	0.7683	2.1561	1.68502	2.75886	1e-09	-1	A03BB Belladonna alkaloids, semisynthetic, quaternary ammonium compounds	1.25e-08
p1yr	E	A03FA	3447	31	360895	1641	0.4778	1.6125	1.12284	2.31557	0.0097	-1	A03FA Propulsives [DG:DG01763]	0.0303
p1yr	E	A04AA	3471	7	362196	340	0.6341	1.8853	0.887152	4.00661	0.099	0	A04AA Serotonin (5HT3) antagonists	0.201
p1yr	E	A05AA	3471	7	362072	464	0.4367	1.5476	0.731557	3.274	0.25	0	A05AA Bile acid and derivatives [DG:DG01956]	0.408
p1yr	E	A06AA	3388	90	358998	3538	0.8053	2.2373	1.79846	2.78328	4.9e-13	-1	A06AA Softeners, emollients	9.19e-12
p1yr	E	A06AB	3313	165	357756	4780	1.0472	2.8497	2.40728	3.37338	4.7e-34	-1	A06AB Contact laxatives	5.29e-32
p1yr	E	A06AC	3462	16	360223	2313	-0.271	0.7626	0.465028	1.25074	0.28	0	A06AC Bulk-forming laxatives	0.441
p1yr	E	A06AD	3168	310	346220	16316	0.6721	1.9583	1.73147	2.21487	1e-26	-1	A06AD Osmotically acting laxatives	7.5e-25
p1yr	E	A06AG	3464	14	362239	297	1.3558	3.88	2.22298	6.7722	1.8e-06	-1	A06AG Enemas	1.19e-05
p1yr	E	A06AX	3470	8	361687	849	-0.1466	0.8637	0.428113	1.74237	0.68	0	A06AX Other drugs for constipation	0.81
p1yr	E	A07AA	3436	42	360556	1980	0.6507	1.9169	1.40243	2.62005	4.5e-05	-1	A07AA Antibiotics	0.000259
p1yr	E	A07DA	3414	64	358871	3665	0.4734	1.6055	1.24467	2.07097	0.00027	-1	A07DA Antipropulsives	0.00132
p1yr	E	A07EC	3441	37	359150	3386	0.0249	1.0252	0.738809	1.42264	0.88	0	A07EC Aminosalicylic acid and similar agents	0.957
p1yr	E	A08AB	3468	10	362177	359	0.4652	1.5923	0.844033	3.00385	0.15	0	A08AB Peripherally acting antiobesity products	0.288
p1yr	E	A09AB	3469	9	362395	141	1.5192	4.5688	2.29487	9.0959	1.5e-05	-1	A09AB Acid preparations	9.38e-05
p1yr	E	A10AB	3335	143	353404	9132	-0.0369	0.9637	0.788653	1.17771	0.72	0	A10AB Insulins and analogues for injection, fast-acting	0.831
p1yr	E	A10AC	3460	18	361478	1058	0.0164	1.0165	0.629506	1.64137	0.95	0	A10AC Insulins and analogues for injection, intermediate-acting	0.972
p1yr	E	A10AD	3441	37	360968	1568	0.2948	1.3429	0.950576	1.89716	0.094	0	A10AD Insulins and analogues for injection, intermediate- or long-acting combined with fast-acting	0.196
p1yr	E	A10AE	3446	32	359792	2744	-0.4124	0.662	0.459028	0.954834	0.027	1	A10AE Insulins and analogues for injection, long-acting	0.0723
p1yr	E	A10BA	3202	276	341469	21067	-0.1902	0.8268	0.706164	0.968017	0.018	1	A10BA Biguanides [DG:DG01684]	0.0526
p1yr	E	A10BB	3391	87	356435	6101	-0.0968	0.9077	0.717683	1.14803	0.42	0	A10BB Sulfonylureas	0.602
p1yr	E	A10BD	3467	11	362208	328	0.6386	1.8939	1.02444	3.50134	0.042	-1	A10BD Combinations of oral blood glucose lowering drugs	0.103
p1yr	E	A10BG	3468	10	361815	721	-0.076	0.9268	0.492272	1.74484	0.81	0	A10BG Thiazolidinediones [DG:DG01683]	0.898
p1yr	E	A10BH	3399	79	357107	5429	-0.0445	0.9564	0.750808	1.21839	0.72	0	A10BH Dipeptidyl peptidase 4 (DPP-4) inhibitors [DG:DG01601]	0.831
p1yr	E	A10BJ	3453	25	360899	1637	-0.3008	0.7402	0.491159	1.11566	0.15	0	A10BJ Glucagon-like peptide-1 receptor (GLP-1) analogues	0.288
p1yr	E	A10BK	3427	51	359145	3391	-0.1608	0.8514	0.635135	1.14143	0.28	0	A10BK Sodium-glucose co-transporter 2 (SGLT2) inhibitors	0.441
p1yr	E	A11CC	3350	128	355167	7369	0.3887	1.4751	1.22832	1.77147	3.2e-05	-1	A11CC Vitamin D and analogues	0.000189
p1yr	E	A11DA	3439	39	361117	1419	0.6439	1.904	1.36689	2.65211	0.00014	-1	A11DA Vitamin B1, plain	0.0007
p1yr	E	A11EX	3467	11	361734	802	-0.1505	0.8603	0.467976	1.58159	0.63	0	A11EX Vitamin B-complex, other combinations	0.779
p1yr	E	A12AA	3463	15	361859	677	0.7424	2.101	1.25171	3.52657	0.005	-1	A12AA Calcium	0.0179
p1yr	E	A12AX	3168	310	331005	31531	0.0885	1.0926	0.966655	1.23485	0.16	0	A12AX Calcium, combinations with vitamin D and/or other drugs	0.303
p1yr	E	A12BA	3471	7	362247	289	0.7506	2.1184	0.992752	4.52025	0.052	0	A12BA Potassium	0.119
p1yr	E	B01AA	3415	63	356643	5893	0.0105	1.0106	0.782693	1.30476	0.94	0	B01AA Vitamin K antagonists	0.97
p1yr	E	B01AB	3464	14	361883	653	0.7201	2.0546	1.20354	3.50729	0.0083	-1	B01AB Heparin group	0.0271
p1yr	E	B01AC	3027	451	322231	40305	-0.0326	0.9679	0.859861	1.08956	0.59	0	B01AC Platelet aggregation inhibitors excl. heparin	0.742
p1yr	E	B01AE	3470	8	361809	727	0.1696	1.1848	0.587616	2.38904	0.64	0	B01AE Direct thrombin inhibitors	0.787
p1yr	E	B01AF	3281	197	346861	15675	0.2906	1.3372	1.15129	1.5532	0.00014	-1	B01AF Direct factor Xa inhibitors	0.0007
p1yr	E	B03AA	3345	133	355195	7341	0.3783	1.4599	1.21708	1.75106	4.6e-05	-1	B03AA Iron bivalent, oral preparations	0.000259
p1yr	E	B03BA	3349	129	354995	7541	0.3899	1.4768	1.2306	1.77226	2.8e-05	-1	B03BA Vitamin B12 (cyanocobalamin and analogues)	0.00017
p1yr	E	B03BB	3332	146	354760	7776	0.5178	1.6783	1.41308	1.99335	3.6e-09	-1	B03BB Folic acid and derivatives	4.05e-08
p1yr	E	B05CB	3456	22	362082	454	1.4712	4.3543	2.81363	6.73849	4e-11	-1	B05CB Salt solutions	5.62e-10
p1yr	E	B05XA	3471	7	362120	416	0.0344	1.035	0.481827	2.22339	0.93	0	B05XA Electrolyte solutions	0.97
p1yr	E	C01AA	3444	34	360421	2115	0.3934	1.482	1.04834	2.09511	0.026	-1	C01AA Digitalis glycosides [DG:DG01697]	0.0705
p1yr	E	C01BC	3472	6	361419	1117	-0.4856	0.6153	0.275533	1.37411	0.24	0	C01BC Antiarrhythmics, class Ic [DG:DG01650]	0.394
p1yr	E	C01BD	3466	12	361857	679	0.3831	1.4668	0.816354	2.63564	0.2	0	C01BD Antiarrhythmics, class III [DG:DG01648]	0.349
p1yr	E	C01CA	3470	8	361609	927	-0.1375	0.8715	0.433456	1.75242	0.7	0	C01CA Adrenergic and dopaminergic agents	0.82
p1yr	E	C01DA	3322	156	352805	9731	0.2187	1.2444	1.03533	1.49574	0.02	-1	C01DA Organic nitrates	0.057
p1yr	E	C01DX	3463	15	361123	1413	-0.4588	0.632	0.37462	1.06628	0.086	0	C01DX Other vasodilators used in cardiac diseases	0.188
p1yr	E	C01EB	3454	24	361474	1062	0.3632	1.4379	0.946956	2.1835	0.088	0	C01EB Other cardiac preparations	0.189
p1yr	E	C02AC	3472	6	362000	536	-0.1905	0.8266	0.367662	1.85823	0.65	0	C02AC Imidazoline receptor agonists	0.791
p1yr	E	C02CA	3387	91	354430	8106	-0.0759	0.9269	0.747166	1.14987	0.49	0	C02CA Alpha-adrenoreceptor antagonists	0.664
p1yr	E	C03AA	3358	120	347792	14744	-0.2098	0.8107	0.671105	0.979438	0.03	1	C03AA Thiazides, plain [DG:DG01749]	0.0767
p1yr	E	C03BA	3402	76	354641	7895	-0.104	0.9012	0.714828	1.1362	0.38	0	C03BA Sulfonamides, plain	0.559
p1yr	E	C03CA	3288	190	352386	10150	0.4525	1.5722	1.33941	1.84556	3.1e-08	-1	C03CA Sulfonamides, plain	2.91e-07
p1yr	E	C03DA	3431	47	359168	3368	0.0721	1.0748	0.798445	1.44671	0.63	0	C03DA Aldosterone antagonists	0.779
p1yr	E	C03EB	3473	5	362194	342	0.2784	1.321	0.543926	3.2081	0.54	0	C03EB High-ceiling diuretics and potassium-sparing agents	0.698
p1yr	E	C05AE	3473	5	362134	402	0.054	1.0555	0.435466	2.55826	0.91	0	C05AE Muscle relaxants	0.97
p1yr	E	C05AX	3430	48	358881	3655	0.2211	1.2474	0.93464	1.66484	0.13	0	C05AX Other agents for treatment of hemorrhoids and anal fissures for topical use	0.259
p1yr	E	C07AA	3434	44	358057	4479	-0.0472	0.9539	0.706431	1.28801	0.76	0	C07AA Beta blocking agents, non-selective	0.868
p1yr	E	C07AB	3082	396	323369	39167	-0.1304	0.8777	0.778208	0.990005	0.034	1	C07AB Beta blocking agents, selective	0.086
p1yr	E	C07AG	3465	13	362025	511	0.6347	1.8865	1.07766	3.30244	0.026	-1	C07AG Alpha and beta blocking agents	0.0705
p1yr	E	C08CA	2897	581	302198	60338	-0.0828	0.9206	0.834936	1.01498	0.097	0	C08CA Dihydropyridine derivatives [DG:DG01928]	0.2
p1yr	E	C08DA	3469	9	361749	787	0.0491	1.0503	0.541513	2.03727	0.88	0	C08DA Phenylalkylamine derivatives	0.957
p1yr	E	C08DB	3449	29	359161	3375	-0.36	0.6976	0.480542	1.01283	0.058	0	C08DB Benzothiazepine derivatives	0.131
p1yr	E	C09AA	2955	523	306151	56385	-0.2525	0.7769	0.701385	0.860506	1.3e-06	1	C09AA ACE inhibitors, plain [DG:DG01501]	8.86e-06
p1yr	E	C09CA	3191	287	331065	31471	-0.2169	0.805	0.708189	0.915044	0.00091	1	C09CA Angiotensin II receptor blockers, plain [DG:DG01495]	0.00379
p1yr	E	C09DX	3470	8	362175	361	0.489	1.6306	0.802827	3.31203	0.18	0	C09DX Angiotensin II receptor blockers (ARBs), other combinations	0.324
p1yr	E	C10AA	2338	1140	236230	126306	-0.2472	0.781	0.71771	0.84983	9.8e-09	1	C10AA HMG CoA reductase inhibitors [DG:DG01660]	1e-07
p1yr	E	C10AB	3463	15	361021	1515	-0.2779	0.7574	0.453235	1.26554	0.29	0	C10AB Fibrates	0.45
p1yr	E	C10AC	3468	10	361845	691	0.2932	1.3408	0.716042	2.51058	0.36	0	C10AC Bile acid sequestrants	0.536
p1yr	E	C10AX	3437	41	358628	3908	-0.1093	0.8965	0.654927	1.22713	0.49	0	C10AX Other lipid modifying agents	0.664
p1yr	E	D01AC	3292	186	351419	11117	0.4493	1.5673	1.34689	1.82373	6.2e-09	-1	D01AC Imidazole and triazole derivatives	6.64e-08
p1yr	E	D01AE	3440	38	360432	2104	0.5678	1.7644	1.27477	2.4422	0.00062	-1	D01AE Other antifungals for topical use	0.00274
p1yr	E	D01BA	3455	23	361271	1265	0.6063	1.8336	1.21067	2.77703	0.0042	-1	D01BA Antifungals for systemic use	0.0158
p1yr	E	D02AC	3418	60	356792	5744	0.034	1.0346	0.798159	1.34112	0.8	0	D02AC Soft paraffin and fat products	0.896
p1yr	E	D02AE	3455	23	360921	1615	0.2808	1.3242	0.872662	2.00945	0.19	0	D02AE Carbamide products	0.339
p1yr	E	D02AX	3165	313	342604	19932	0.4191	1.5205	1.34704	1.71635	1.2e-11	-1	D02AX Other emollients and protectives	1.93e-10
p1yr	E	D05AX	3441	37	359178	3358	0.0916	1.0959	0.789739	1.5207	0.58	0	D05AX Other antipsoriatics for topical use	0.733
p1yr	E	D06AX	3431	47	359726	2810	0.4384	1.5502	1.15477	2.08092	0.0035	-1	D06AX Other antibiotics for topical use	0.0133
p1yr	E	D06BB	3468	10	361854	682	0.4251	1.5298	0.816595	2.86576	0.18	0	D06BB Antivirals	0.324
p1yr	E	D06BX	3458	20	360922	1614	0.2777	1.3201	0.846727	2.05801	0.22	0	D06BX Other chemotherapeutics	0.369
p1yr	E	D07AA	3419	59	357861	4675	0.2605	1.2976	0.999345	1.68474	0.051	0	D07AA Corticosteroids, weak (group I)	0.119
p1yr	E	D07AB	3422	56	358369	4167	0.3285	1.3889	1.06269	1.81512	0.016	-1	D07AB Corticosteroids, moderately potent (group II)	0.0474
p1yr	E	D07AC	3333	145	350168	12368	0.1754	1.1917	1.00661	1.41075	0.042	-1	D07AC Corticosteroids, potent (group III)	0.103
p1yr	E	D07AD	3425	53	358328	4208	0.2929	1.3403	1.01855	1.76359	0.036	-1	D07AD Corticosteroids, very potent (group IV)	0.09
p1yr	E	D07BC	3473	5	361914	622	-0.3377	0.7134	0.293599	1.73338	0.46	0	D07BC Corticosteroids, potent, combinations with antiseptics	0.651
p1yr	E	D07CA	3456	22	360902	1634	0.3056	1.3574	0.888513	2.07384	0.16	0	D07CA Corticosteroids, weak, combinations with antibiotics	0.303
p1yr	E	D07CC	3417	61	359438	3098	0.6442	1.9045	1.47138	2.46505	9.9e-07	-1	D07CC Corticosteroids, potent, combinations with antibiotics	7.19e-06
p1yr	E	D07CD	3461	17	361716	820	0.6426	1.9014	1.17029	3.08936	0.0095	-1	D07CD Corticosteroids, very potent, combinations with antibiotics	0.0301
p1yr	E	D09AA	3459	19	362000	536	1.1683	3.2166	2.01779	5.1278	9.1e-07	-1	D09AA Medicated dressings with antiinfectives	6.82e-06
p1yr	E	D10AF	3473	5	362172	364	0.1935	1.2135	0.500434	2.94277	0.67	0	D10AF Antiinfectives for treatment of acne	0.802
p1yr	E	D11AC	3456	22	361221	1315	0.3678	1.4445	0.943092	2.21257	0.091	0	D11AC Medicated shampoos	0.191
p1yr	E	D11AH	3473	5	362001	535	-0.1154	0.891	0.368553	2.15394	0.8	0	D11AH Agents for dermatitis, excluding corticosteroids	0.896
p1yr	E	D11AX	3471	7	362082	454	0.4726	1.6042	0.758571	3.39249	0.22	0	D11AX Other dermatologicals	0.369
p1yr	E	G01AF	3441	37	360487	2049	0.4414	1.5549	1.11607	2.16616	0.0091	-1	G01AF Imidazole derivatives	0.0293
p1yr	E	G03AC	3471	7	361730	806	-0.4485	0.6386	0.302337	1.34879	0.24	0	G03AC Progestogens	0.394
p1yr	E	G03BA	3462	16	361453	1083	0.0638	1.0659	0.645854	1.75903	0.8	0	G03BA 3-oxoandrosten (4) derivatives	0.896
p1yr	E	G03CA	3312	166	342998	19538	-0.0584	0.9432	0.802328	1.10892	0.48	0	G03CA Natural and semisynthetic estrogens, plain	0.663
p1yr	E	G03CX	3472	6	362057	479	0.2555	1.291	0.575279	2.89737	0.54	0	G03CX Other estrogens	0.698
p1yr	E	G03DA	3466	12	361488	1048	0.0222	1.0224	0.576623	1.81296	0.94	0	G03DA Pregnen (4) derivatives	0.97
p1yr	E	G03FA	3464	14	361607	929	0.3317	1.3933	0.818721	2.37117	0.22	0	G03FA Progestogens and estrogens, fixed combinations	0.369
p1yr	E	G03FB	3452	26	361033	1503	0.4551	1.5764	1.06426	2.33485	0.023	-1	G03FB Progestogens and estrogens, sequential preparations	0.0647
p1yr	E	G04BD	3363	115	352538	9998	0.0943	1.0989	0.908586	1.32899	0.33	0	G04BD Urinary antispasmodics	0.502
p1yr	E	G04BE	3340	138	350579	11957	0.0411	1.0419	0.873413	1.2429	0.65	0	G04BE Drugs used in erectile dysfunction	0.791
p1yr	E	G04CA	3462	16	361233	1303	0.1774	1.1941	0.725109	1.96641	0.49	0	G04CA Alpha-adrenoreceptor antagonists	0.664
p1yr	E	G04CB	3402	76	354467	8069	0.0001	1.0001	0.791315	1.26391	1	0	G04CB Testosterone-5-alpha reductase inhibitors	1
p1yr	E	H02AA	3468	10	362070	466	0.6351	1.8872	0.995257	3.57848	0.052	0	H02AA Mineralocorticoids	0.119
p1yr	E	H02AB	3201	277	344000	18536	0.3757	1.456	1.27686	1.66019	2e-08	-1	H02AB Glucocorticoids	1.96e-07
p1yr	E	H02BX	3455	23	360830	1706	0.2834	1.3276	0.876137	2.01167	0.18	0	H02BX Corticosteroids for systemic use, combinations	0.324
p1yr	E	H03AA	3228	250	331117	31419	-0.2302	0.7944	0.695556	0.90732	0.00069	1	H03AA Thyroid hormones	0.00299
p1yr	E	J01AA	3206	272	347793	14743	0.5829	1.7912	1.57331	2.03917	1.3e-18	-1	J01AA Tetracyclines [DG:DG01197]	2.93e-17
p1yr	E	J01CA	3024	454	338005	24531	0.6471	1.91	1.72364	2.11661	4.8e-35	-1	J01CA Penicillins with extended spectrum [DG:DG01780]	1.08e-32
p1yr	E	J01CE	3444	34	360072	2464	0.2422	1.274	0.905153	1.79326	0.17	0	J01CE Beta-lactamase sensitive penicillins [DG:DG01778]	0.314
p1yr	E	J01CF	3241	237	351015	11521	0.7122	2.0384	1.78038	2.33376	6.1e-25	-1	J01CF Beta-lactamase resistant penicillins [DG:DG01779]	2.29e-23
p1yr	E	J01CR	3382	96	357974	4562	0.6977	2.0091	1.63179	2.47364	4.9e-11	-1	J01CR Combinations of penicillins, incl. beta-lactamase inhibitors	6.49e-10
p1yr	E	J01DB	3442	36	360384	2152	0.4991	1.6472	1.17854	2.30226	0.0035	-1	J01DB First-generation cephalosporins [DG:DG01774]	0.0133
p1yr	E	J01EA	3407	71	358106	4430	0.4689	1.5983	1.25704	2.03213	0.00013	-1	J01EA Trimethoprim and derivatives [DG:DG01581]	0.00068
p1yr	E	J01EE	3468	10	362154	382	0.8135	2.2558	1.19461	4.25978	0.012	-1	J01EE Combinations of sulfonamides and trimethoprim, incl. derivatives	0.0365
p1yr	E	J01FA	3336	142	354259	8277	0.4677	1.5964	1.34262	1.89813	1.2e-07	-1	J01FA Macrolides [DG:DG01551]	1.04e-06
p1yr	E	J01FF	3465	13	362233	303	1.29	3.6328	2.05955	6.40794	8.4e-06	-1	J01FF Lincosamides [DG:DG01578]	5.4e-05
p1yr	E	J01MA	3445	33	360304	2232	0.3006	1.3506	0.953231	1.91368	0.091	0	J01MA Fluoroquinolones [DG:DG01549]	0.191
p1yr	E	J01XE	3199	279	345641	16895	0.6167	1.8528	1.63276	2.10239	1.1e-21	-1	J01XE Nitrofuran derivatives	3.09e-20
p1yr	E	J01XX	3471	7	361866	670	0.0463	1.0474	0.494927	2.21642	0.9	0	J01XX Other antibacterials	0.969
p1yr	E	J02AC	3441	37	360621	1915	0.5853	1.7956	1.29061	2.49807	0.00051	-1	J02AC Triazole derivatives	0.00234
p1yr	E	J05AB	3433	45	359344	3192	0.3413	1.4068	1.04448	1.89471	0.025	-1	J05AB Nucleosides and nucleotides excl. reverse transcriptase inhibitors [DG:DG02840]	0.0694
p1yr	E	J07AL	3464	14	360681	1855	-0.2176	0.8044	0.474592	1.36347	0.42	0	J07AL Pneumococcal vaccines	0.602
p1yr	E	J07AP	3467	11	361251	1285	-0.0724	0.9301	0.512866	1.68693	0.81	0	J07AP Typhoid vaccines	0.898
p1yr	E	J07BB	3275	203	352217	10319	0.7396	2.0952	1.81321	2.42099	1.1e-23	-1	J07BB Influenza vaccines	3.54e-22
p1yr	E	J07BC	3472	6	361668	868	-0.3642	0.6947	0.31083	1.5528	0.38	0	J07BC Hepatitis vaccines	0.559
p1yr	E	J07CA	3453	25	359633	2903	-0.0723	0.9303	0.626244	1.38189	0.72	0	J07CA Bacterial and viral vaccines, combined	0.831
p1yr	E	L01BC	3466	12	360286	2250	-0.3647	0.6944	0.393033	1.22689	0.21	0	L01BC Pyrimidine analogues	0.361
p1yr	E	L02AE	3460	18	360871	1665	0.2407	1.2722	0.795164	2.03527	0.32	0	L02AE Gonadotropin releasing hormone analogues	0.49
p1yr	E	L02BA	3469	9	361562	974	-0.0395	0.9613	0.497287	1.85809	0.91	0	L02BA Anti-estrogens	0.97
p1yr	E	L02BG	3442	36	358984	3552	0.1893	1.2084	0.865934	1.68628	0.27	0	L02BG Aromatase inhibitors [DG:DG01596]	0.431
p1yr	E	L04AA	3470	8	361891	645	0.0234	1.0237	0.505754	2.07193	0.95	0	L04AA Selective immunosuppressants	0.972
p1yr	E	L04AX	3438	40	358557	3979	-0.0045	0.9955	0.726389	1.36421	0.98	0	L04AX Other immunosuppressants	0.989
p1yr	E	M01AB	3454	24	361015	1521	0.3997	1.4914	0.993528	2.23887	0.054	0	M01AB Acetic acid derivatives and related substances	0.123
p1yr	E	M01AE	3251	227	343881	18655	0.1709	1.1864	1.03508	1.35982	0.014	-1	M01AE Propionic acid derivatives	0.042
p1yr	E	M01AH	3461	17	361338	1198	0.2771	1.3193	0.814661	2.13661	0.26	0	M01AH Coxibs	0.418
p1yr	E	M02AA	3209	269	345107	17429	0.4381	1.5498	1.36099	1.76477	3.8e-11	-1	M02AA Antiinflammatory preparations, non-steroids for topical use	5.62e-10
p1yr	E	M03BA	3472	6	362394	142	1.1411	3.1303	1.36249	7.19173	0.0072	-1	M03BA Carbamic acid esters	0.0242
p1yr	E	M03BX	3464	14	361672	864	0.2342	1.264	0.740734	2.15675	0.39	0	M03BX Other centrally acting agents	0.57
p1yr	E	M04AA	3359	119	353130	9406	0.0409	1.0417	0.86112	1.26026	0.67	0	M04AA Preparations inhibiting uric acid production	0.802
p1yr	E	M04AC	3442	36	360498	2038	0.4394	1.5518	1.10975	2.16984	0.01	-1	M04AC Preparations with no effect on uric acid metabolism	0.0308
p1yr	E	M05BA	3359	119	350013	12523	0.189	1.2081	1.0014	1.45744	0.048	-1	M05BA Bisphosphonates [DG:DG01600]	0.114
p1yr	E	M05BX	3472	6	361761	775	0.0671	1.0694	0.47715	2.39675	0.87	0	M05BX Other drugs affecting bone structure and mineralization	0.957
p1yr	E	N01BB	3426	52	359005	3531	0.3994	1.4909	1.1291	1.96853	0.0049	-1	N01BB Amides	0.0179
p1yr	E	N01BX	3470	8	361785	751	-0.0547	0.9468	0.470187	1.90646	0.88	0	N01BX Other local anesthetics	0.957
p1yr	E	N02AA	3351	127	357411	5125	0.6686	1.9515	1.61644	2.35597	3.5e-12	-1	N02AA Natural opium alkaloids	6.06e-11
p1yr	E	N02AB	3464	14	362023	513	0.5997	1.8216	1.06072	3.12841	0.03	-1	N02AB Phenylpiperidine derivatives	0.0767
p1yr	E	N02AE	3437	41	360786	1750	0.577	1.7807	1.29332	2.45184	0.00041	-1	N02AE Oripavine derivatives	0.00196
p1yr	E	N02AJ	3165	313	341192	21344	0.3074	1.3599	1.20511	1.53448	6.1e-07	-1	N02AJ Opioids in combination with non-opioid analgesics	4.9e-06
p1yr	E	N02AX	3392	86	356117	6419	0.0059	1.006	0.806208	1.25519	0.96	0	N02AX Other opioids	0.977
p1yr	E	N02BE	2764	714	317807	44729	0.4898	1.632	1.48894	1.78885	1.3e-25	-1	N02BE Anilides	5.85e-24
p1yr	E	N02BG	3464	14	362012	524	0.7662	2.1516	1.25716	3.68252	0.0052	-1	N02BG Other analgesics and antipyretics	0.0183
p1yr	E	N02CC	3428	50	357817	4719	0.0417	1.0426	0.785164	1.38442	0.77	0	N02CC Selective serotonin (5HT1) agonists [DG:DG01943]	0.875
p1yr	E	N02CX	3470	8	361576	960	-0.4474	0.6393	0.316156	1.2927	0.21	0	N02CX Other antimigraine preparations	0.361
p1yr	E	N03AB	3470	8	362098	438	0.4688	1.5981	0.785027	3.25326	0.2	0	N03AB Hydantoin derivatives	0.349
p1yr	E	N03AE	3465	13	361888	648	0.397	1.4874	0.847257	2.61129	0.17	0	N03AE Benzodiazepine derivatives	0.314
p1yr	E	N03AF	3462	16	361029	1507	-0.0987	0.906	0.550856	1.49014	0.7	0	N03AF Carboxamide derivatives	0.82
p1yr	E	N03AG	3460	18	361339	1197	-0.0037	0.9963	0.617851	1.60656	0.99	0	N03AG Fatty acid derivatives	0.994
p1yr	E	N03AX	3248	230	347291	15245	0.1972	1.218	1.05734	1.4031	0.0063	-1	N03AX Other antiepileptics	0.0218
p1yr	E	N04BA	3447	31	360253	2283	0.3669	1.4433	1.00427	2.07415	0.047	-1	N04BA Dopa and dopa derivatives	0.113
p1yr	E	N04BC	3453	25	360940	1596	0.4451	1.5607	1.04555	2.32962	0.029	-1	N04BC Dopamine agonists	0.0759
p1yr	E	N04BD	3472	6	361995	541	0.2276	1.2556	0.558169	2.82445	0.58	0	N04BD Monoamine oxidase B inhibitors	0.733
p1yr	E	N05AB	3425	53	358025	4511	0.1804	1.1976	0.909756	1.57665	0.2	0	N05AB Phenothiazines with piperazine structure	0.349
p1yr	E	N05AD	3469	9	362333	203	1.2167	3.3761	1.6938	6.72913	0.00055	-1	N05AD Butyrophenone derivatives [DG:DG01940]	0.00248
p1yr	E	N05AH	3453	25	361142	1394	0.198	1.2189	0.813399	1.82657	0.34	0	N05AH Diazepines, oxazepines and thiazepines	0.513
p1yr	E	N05AN	3473	5	362000	536	-0.2764	0.7585	0.312352	1.84191	0.54	0	N05AN Lithium	0.698
p1yr	E	N05AX	3444	34	361785	751	0.9102	2.4848	1.72356	3.5822	1.1e-06	-1	N05AX Other antipsychotics	7.73e-06
p1yr	E	N05BA	3357	121	357409	5127	0.7433	2.1028	1.74173	2.53875	1e-14	-1	N05BA Benzodiazepine derivatives [DG:DG01914]	2.05e-13
p1yr	E	N05BB	3470	8	361982	554	0.2332	1.2626	0.623547	2.55666	0.52	0	N05BB Diphenylmethane derivatives	0.696
p1yr	E	N05CD	3429	49	361314	1222	1.3666	3.9221	2.91453	5.2781	1.9e-19	-1	N05CD Benzodiazepine derivatives	4.75e-18
p1yr	E	N05CF	3393	85	356861	5675	0.3612	1.435	1.15148	1.78837	0.0013	-1	N05CF Benzodiazepine related drugs	0.00532
p1yr	E	N05CH	3471	7	362027	509	0.1498	1.1616	0.546564	2.46853	0.7	0	N05CH Melatonin receptor agonists	0.82
p1yr	E	N06AA	3252	226	342733	19803	0.0584	1.0601	0.92202	1.21891	0.41	0	N06AA Non-selective monoamine reuptake inhibitors [DG:DG01730]	0.595
p1yr	E	N06AB	3134	344	335816	26720	0.0747	1.0775	0.953389	1.21781	0.23	0	N06AB Selective serotonin reuptake inhibitors	0.383
p1yr	E	N06AX	3302	176	352261	10275	0.2784	1.321	1.12229	1.55497	0.00082	-1	N06AX Other antidepressants	0.00348
p1yr	E	N06DA	3417	61	360574	1962	0.9096	2.4834	1.85223	3.32965	1.2e-09	-1	N06DA Anticholinesterases	1.42e-08
p1yr	E	N06DX	3417	61	361619	917	1.6458	5.1852	3.82266	7.03351	3.7e-26	-1	N06DX Other anti-dementia drugs	2.08e-24
p1yr	E	N07BA	3473	5	362031	505	-0.2716	0.7622	0.31388	1.8507	0.55	0	N07BA Drugs used in nicotine dependence	0.707
p1yr	E	N07BC	3473	5	362434	102	1.0456	2.8451	1.1166	7.24944	0.028	-1	N07BC Drugs used in opioid dependence	0.0741
p1yr	E	N07CA	3427	51	358759	3777	0.2581	1.2945	0.977037	1.71514	0.072	0	N07CA Antivertigo preparations	0.159
p1yr	E	P01AB	3440	38	361021	1515	0.8769	2.4034	1.73505	3.32909	1.3e-07	-1	P01AB Nitroimidazole derivatives	1.08e-06
p1yr	E	P01BA	3459	19	360780	1756	0.0332	1.0338	0.655411	1.63059	0.89	0	P01BA Aminoquinolines	0.963
p1yr	E	P01BC	3427	51	358458	4078	0.0878	1.0918	0.822324	1.44954	0.54	0	P01BC Methanolquinolines	0.698
p1yr	E	P03AC	3471	7	362246	290	0.664	1.9425	0.905177	4.16869	0.088	0	P03AC Pyrethrines, incl. synthetic compounds	0.189
p1yr	E	R01AC	3471	7	361999	537	0.2782	1.3207	0.625004	2.79077	0.47	0	R01AC Antiallergic agents, excl. corticosteroids	0.661
p1yr	E	R01AD	3229	249	339238	23298	0.0754	1.0784	0.945067	1.23044	0.26	0	R01AD Corticosteroids	0.418
p1yr	E	R01AX	3471	7	362081	455	0.4028	1.496	0.706026	3.16984	0.29	0	R01AX Other nasal preparations	0.45
p1yr	E	R02AX	3471	7	362224	312	0.779	2.1793	1.02462	4.63533	0.043	-1	R02AX Other throat preparetions	0.104
p1yr	E	R03AC	3041	437	327371	35165	0.1029	1.1084	0.979534	1.25422	0.1	0	R03AC Selective beta-2-adrenoreceptor agonists	0.201
p1yr	E	R03AK	3252	226	343623	18913	0.0063	1.0064	0.861426	1.17568	0.94	0	R03AK Adrenergics in combination with corticosteroids or other drugs, excl. anticholinergics	0.97
p1yr	E	R03AL	3440	38	359726	2810	0.1214	1.1291	0.806138	1.58138	0.48	0	R03AL Adrenergics in combination with anticholinergics incl. triple combinations with corticosteroids	0.663
p1yr	E	R03BA	3332	146	348901	13635	0.0084	1.0084	0.844527	1.20413	0.93	0	R03BA Glucocorticoids	0.97
p1yr	E	R03BB	3405	73	356896	5640	0.0426	1.0435	0.810062	1.34433	0.74	0	R03BB Anticholinergics	0.849
p1yr	E	R03DA	3470	8	362062	474	0.0344	1.035	0.506326	2.11567	0.93	0	R03DA Xanthines	0.97
p1yr	E	R03DC	3450	28	359268	3268	-0.4554	0.6342	0.433005	0.928867	0.019	1	R03DC Leukotriene receptor antagonists	0.0548
p1yr	E	R05CB	3435	43	359106	3430	0.0162	1.0163	0.740945	1.39405	0.92	0	R05CB Mucolytics	0.97
p1yr	E	R05DA	3310	168	351751	10785	0.3986	1.4897	1.27098	1.74615	8.7e-07	-1	R05DA Opium alkaloids and derivatives	6.75e-06
p1yr	E	R06AB	3463	15	361557	979	0.243	1.2751	0.760043	2.13916	0.36	0	R06AB Substituted alkylamines	0.536
p1yr	E	R06AD	3461	17	361475	1061	0.2534	1.2885	0.794274	2.0901	0.3	0	R06AD Phenothiazine derivatives	0.462
p1yr	E	R06AE	3328	150	353920	8616	0.4713	1.6021	1.35221	1.89818	5.1e-08	-1	R06AE Piperazine derivatives	4.59e-07
p1yr	E	R06AX	3359	119	352363	10173	0.0679	1.0702	0.8876	1.29041	0.48	0	R06AX Other antihistamines for systemic use	0.663
p1yr	E	S01AA	3421	57	358596	3940	0.3614	1.4353	1.09999	1.87294	0.0078	-1	S01AA Antibiotics	0.0258
p1yr	E	S01BA	3464	14	360858	1678	-0.1513	0.8596	0.506354	1.45924	0.57	0	S01BA Corticosteroids, plain	0.729
p1yr	E	S01CA	3472	6	362176	360	0.5708	1.7697	0.782077	4.00436	0.17	0	S01CA Corticosteroids and antiinfectives in combination	0.314
p1yr	E	S01EC	3460	18	359379	3157	-0.4427	0.6423	0.402943	1.0238	0.063	0	S01EC Carbonic anhydrase inhibitors	0.14
p1yr	E	S01ED	3449	29	357813	4723	-0.3042	0.7377	0.510568	1.06591	0.1	0	S01ED Beta blocking agents	0.201
p1yr	E	S01EE	3415	63	354810	7726	-0.0786	0.9244	0.718469	1.18934	0.54	0	S01EE Prostaglandin analogues	0.698
p1yr	E	S01GX	3450	28	360283	2253	0.1018	1.1071	0.758681	1.61557	0.6	0	S01GX Other antiallergics	0.75
p1yr	E	S01XA	3310	168	342750	19786	-0.116	0.8905	0.759077	1.04457	0.15	0	S01XA Other ophthalmologicals	0.288
p1yr	E	S02AA	3464	14	361399	1137	0.2	1.2214	0.718689	2.07575	0.46	0	S02AA Antiinfectives	0.651
p1yr	E	S02CA	3457	21	361513	1023	0.6585	1.9319	1.24923	2.98766	0.0031	-1	S02CA Corticosteroids and antiinfectives in combination	0.0122
p1yr	E	S03BA	3470	8	361537	999	-0.158	0.8539	0.424999	1.71545	0.66	0	S03BA Corticosteroids	0.798
p1yr	E	V03AE	3469	9	362419	117	1.3177	3.7348	1.7958	7.76746	0.00042	-1	V03AE Drugs for treatment of hyperkalemia and hyperphosphatemia	0.00197
p1yr	E	V06DC	3465	13	362231	305	0.8885	2.4316	1.3631	4.33768	0.0026	-1	V06DC Carbohydrates	0.0104
p1yr	E	V07AY	3330	148	352318	10218	0.055	1.0565	0.884438	1.26206	0.54	0	V07AY Other non-therapeutic auxiliary products	0.698
p1yr	F	A01AB	3370	108	23895	783	0.0321	1.0326	0.838312	1.27197	0.76	0	A01AB Antiinfectives and antiseptics for local oral treatment	0.871
p1yr	F	A01AD	3452	26	24480	198	-0.0333	0.9673	0.635892	1.47139	0.88	0	A01AD Other agents for local oral treatment	0.919
p1yr	F	A02BA	3394	84	23741	937	-0.3505	0.7044	0.559206	0.887189	0.0029	1	A02BA H2-receptor antagonists [DG:DG01481]	0.0435
p1yr	F	A02BC	2366	1112	14530	10148	-0.278	0.7573	0.698701	0.820761	1.3e-11	1	A02BC Proton pump inhibitors [DG:DG01646]	1.46e-09
p1yr	F	A02BX	3350	128	23595	1083	-0.0313	0.9692	0.800181	1.17388	0.75	0	A02BX Other drugs for peptic ulcer and gastro-oesophageal reflux disease (GORD)	0.865
p1yr	F	A03AA	3434	44	24253	425	-0.2536	0.776	0.564746	1.06622	0.12	0	A03AA Synthetic anticholinergics, esters with tertiary amino group	0.333
p1yr	F	A03AX	3461	17	24465	213	-0.4452	0.6407	0.388119	1.05755	0.082	0	A03AX Other drugs for functional gastrointestinal disorders	0.28
p1yr	F	A03BB	3409	69	24165	513	0.0231	1.0234	0.788849	1.32768	0.86	0	A03BB Belladonna alkaloids, semisynthetic, quaternary ammonium compounds	0.913
p1yr	F	A03FA	3447	31	24286	392	-0.5311	0.5879	0.40471	0.854128	0.0053	1	A03FA Propulsives [DG:DG01763]	0.0542
p1yr	F	A04AA	3471	7	24563	115	-0.6742	0.5096	0.23597	1.10048	0.086	0	A04AA Serotonin (5HT3) antagonists	0.288
p1yr	F	A05AA	3471	7	24619	59	-0.0696	0.9328	0.420744	2.06807	0.86	0	A05AA Bile acid and derivatives [DG:DG01956]	0.913
p1yr	F	A06AA	3388	90	23984	694	0.0657	1.0679	0.84943	1.34251	0.57	0	A06AA Softeners, emollients	0.759
p1yr	F	A06AB	3313	165	23680	998	0.3098	1.3631	1.14226	1.62675	0.00059	-1	A06AB Contact laxatives	0.0121
p1yr	F	A06AC	3462	16	24425	253	-0.57	0.5655	0.339145	0.942949	0.029	1	A06AC Bulk-forming laxatives	0.155
p1yr	F	A06AD	3168	310	21968	2710	-0.0476	0.9535	0.838301	1.08463	0.47	0	A06AD Osmotically acting laxatives	0.696
p1yr	F	A06AG	3464	14	24600	78	0.4646	1.5914	0.887832	2.85261	0.12	0	A06AG Enemas	0.333
p1yr	F	A06AX	3470	8	24503	175	-0.9603	0.3828	0.187336	0.782085	0.0084	1	A06AX Other drugs for constipation	0.07
p1yr	F	A07AA	3436	42	24315	363	-0.0641	0.9379	0.67518	1.30298	0.7	0	A07AA Antibiotics	0.842
p1yr	F	A07DA	3414	64	24076	602	-0.1153	0.8911	0.683039	1.16259	0.4	0	A07DA Antipropulsives	0.638
p1yr	F	A07EC	3441	37	24334	344	-0.217	0.8049	0.569621	1.13739	0.22	0	A07EC Aminosalicylic acid and similar agents	0.485
p1yr	F	A08AB	3468	10	24626	52	-0.0497	0.9515	0.475743	1.90311	0.89	0	A08AB Peripherally acting antiobesity products	0.919
p1yr	F	A09AB	3469	9	24654	24	1.1171	3.0561	1.39573	6.69159	0.0052	-1	A09AB Acid preparations	0.0542
p1yr	F	A10AB	3335	143	23586	1092	-0.1493	0.8613	0.696916	1.06439	0.17	0	A10AB Insulins and analogues for injection, fast-acting	0.42
p1yr	F	A10AC	3460	18	24525	153	-0.2234	0.7998	0.481053	1.32979	0.39	0	A10AC Insulins and analogues for injection, intermediate-acting	0.631
p1yr	F	A10AD	3441	37	24454	224	0.1956	1.2161	0.837782	1.76523	0.3	0	A10AD Insulins and analogues for injection, intermediate- or long-acting combined with fast-acting	0.582
p1yr	F	A10AE	3446	32	24320	358	-0.5991	0.5493	0.374379	0.805971	0.0022	1	A10AE Insulins and analogues for injection, long-acting	0.0354
p1yr	F	A10BA	3202	276	22789	1889	0.0374	1.0381	0.880642	1.22377	0.66	0	A10BA Biguanides [DG:DG01684]	0.83
p1yr	F	A10BB	3391	87	24045	633	-0.0517	0.9496	0.738596	1.22088	0.69	0	A10BB Sulfonylureas	0.842
p1yr	F	A10BD	3467	11	24647	31	0.7282	2.0713	1.01119	4.24292	0.046	-1	A10BD Combinations of oral blood glucose lowering drugs	0.207
p1yr	F	A10BG	3468	10	24620	58	0.2251	1.2524	0.627659	2.49913	0.52	0	A10BG Thiazolidinediones [DG:DG01683]	0.741
p1yr	F	A10BH	3399	79	24127	551	0.0652	1.0674	0.822874	1.38457	0.62	0	A10BH Dipeptidyl peptidase 4 (DPP-4) inhibitors [DG:DG01601]	0.796
p1yr	F	A10BJ	3453	25	24517	161	-0.1806	0.8347	0.53566	1.3008	0.42	0	A10BJ Glucagon-like peptide-1 receptor (GLP-1) analogues	0.652
p1yr	F	A10BK	3427	51	24404	274	0.034	1.0345	0.750334	1.42638	0.84	0	A10BK Sodium-glucose co-transporter 2 (SGLT2) inhibitors	0.913
p1yr	F	A11CC	3350	128	23733	945	0.0053	1.0054	0.826599	1.22276	0.96	0	A11CC Vitamin D and analogues	0.974
p1yr	F	A11DA	3439	39	24396	282	0.0036	1.0036	0.707954	1.4227	0.98	0	A11DA Vitamin B1, plain	0.98
p1yr	F	A11EX	3467	11	24516	162	-0.7243	0.4847	0.260751	0.900834	0.022	1	A11EX Vitamin B-complex, other combinations	0.141
p1yr	F	A12AA	3463	15	24581	97	0.2074	1.2304	0.70484	2.14799	0.47	0	A12AA Calcium	0.696
p1yr	F	A12AX	3168	310	21628	3050	-0.1121	0.8939	0.786273	1.01635	0.087	0	A12AX Calcium, combinations with vitamin D and/or other drugs	0.288
p1yr	F	A12BA	3471	7	24613	65	-0.1964	0.8216	0.37147	1.81738	0.63	0	A12BA Potassium	0.796
p1yr	F	B01AA	3415	63	23989	689	-0.2283	0.7959	0.609129	1.03988	0.094	0	B01AA Vitamin K antagonists	0.293
p1yr	F	B01AB	3464	14	24496	182	-0.5322	0.5873	0.33861	1.01864	0.058	0	B01AB Heparin group	0.242
p1yr	F	B01AC	3027	451	20581	4097	-0.1065	0.899	0.79776	1.013	0.081	0	B01AC Platelet aggregation inhibitors excl. heparin	0.28
p1yr	F	B01AE	3470	8	24579	99	-0.3191	0.7268	0.350182	1.50846	0.39	0	B01AE Direct thrombin inhibitors	0.631
p1yr	F	B01AF	3281	197	22594	2084	-0.1717	0.8423	0.720789	0.984217	0.031	1	B01AF Direct factor Xa inhibitors	0.162
p1yr	F	B03AA	3345	133	23381	1297	-0.2063	0.8136	0.673707	0.982439	0.032	1	B03AA Iron bivalent, oral preparations	0.164
p1yr	F	B03BA	3349	129	23779	899	0.1556	1.1684	0.961857	1.41923	0.12	0	B03BA Vitamin B12 (cyanocobalamin and analogues)	0.333
p1yr	F	B03BB	3332	146	23619	1059	0.1398	1.1501	0.957612	1.38126	0.14	0	B03BB Folic acid and derivatives	0.375
p1yr	F	B05CB	3456	22	24560	118	0.4408	1.554	0.975596	2.47529	0.064	0	B05CB Salt solutions	0.257
p1yr	F	B05XA	3471	7	24576	102	-0.6484	0.5229	0.238904	1.14447	0.1	0	B05XA Electrolyte solutions	0.3
p1yr	F	C01AA	3444	34	24309	369	-0.1184	0.8883	0.619883	1.27306	0.52	0	C01AA Digitalis glycosides [DG:DG01697]	0.741
p1yr	F	C01BC	3472	6	24553	125	-0.9258	0.3962	0.173628	0.904152	0.028	1	C01BC Antiarrhythmics, class Ic [DG:DG01650]	0.154
p1yr	F	C01BD	3466	12	24541	137	-0.3302	0.7188	0.393599	1.31266	0.28	0	C01BD Antiarrhythmics, class III [DG:DG01648]	0.558
p1yr	F	C01CA	3470	8	24565	113	-0.6189	0.5385	0.260694	1.11249	0.095	0	C01CA Adrenergic and dopaminergic agents	0.293
p1yr	F	C01DA	3322	156	23272	1406	-0.0692	0.9332	0.773525	1.12577	0.47	0	C01DA Organic nitrates	0.696
p1yr	F	C01DX	3463	15	24473	205	-0.4378	0.6454	0.376783	1.10562	0.11	0	C01DX Other vasodilators used in cardiac diseases	0.321
p1yr	F	C01EB	3454	24	24504	174	0.1286	1.1373	0.730579	1.7703	0.57	0	C01EB Other cardiac preparations	0.759
p1yr	F	C02AC	3472	6	24616	62	-0.2755	0.7592	0.323625	1.78086	0.53	0	C02AC Imidazoline receptor agonists	0.741
p1yr	F	C02CA	3387	91	23865	813	-0.0725	0.9301	0.740712	1.1679	0.53	0	C02CA Alpha-adrenoreceptor antagonists	0.741
p1yr	F	C03AA	3358	120	23657	1021	0.0628	1.0648	0.871101	1.3016	0.54	0	C03AA Thiazides, plain [DG:DG01749]	0.745
p1yr	F	C03BA	3402	76	24000	678	-0.1106	0.8953	0.700375	1.14455	0.38	0	C03BA Sulfonamides, plain	0.629
p1yr	F	C03CA	3288	190	22902	1776	-0.0494	0.9518	0.807425	1.12192	0.56	0	C03CA Sulfonamides, plain	0.759
p1yr	F	C03DA	3431	47	24122	556	-0.3901	0.677	0.498038	0.920272	0.013	1	C03DA Aldosterone antagonists	0.0975
p1yr	F	C03EB	3473	5	24637	41	0.082	1.0854	0.422596	2.78788	0.86	0	C03EB High-ceiling diuretics and potassium-sparing agents	0.913
p1yr	F	C05AE	3473	5	24603	75	-0.8384	0.4324	0.173091	1.08024	0.073	0	C05AE Muscle relaxants	0.277
p1yr	F	C05AX	3430	48	24156	522	-0.3842	0.681	0.503665	0.920771	0.013	1	C05AX Other agents for treatment of hemorrhoids and anal fissures for topical use	0.0975
p1yr	F	C07AA	3434	44	24258	420	-0.3067	0.7359	0.535685	1.01095	0.058	0	C07AA Beta blocking agents, non-selective	0.242
p1yr	F	C07AB	3082	396	20642	4036	-0.261	0.7703	0.681498	0.870672	3e-05	1	C07AB Beta blocking agents, selective	0.00113
p1yr	F	C07AG	3465	13	24585	93	0.0965	1.1013	0.608318	1.99379	0.75	0	C07AG Alpha and beta blocking agents	0.865
p1yr	F	C08CA	2897	581	19963	4715	-0.0217	0.9785	0.882703	1.08472	0.68	0	C08CA Dihydropyridine derivatives [DG:DG01928]	0.841
p1yr	F	C08DA	3469	9	24595	83	-0.1365	0.8724	0.433509	1.75563	0.7	0	C08DA Phenylalkylamine derivatives	0.842
p1yr	F	C08DB	3449	29	24302	376	-0.3783	0.685	0.465448	1.00813	0.055	0	C08DB Benzothiazepine derivatives	0.242
p1yr	F	C09AA	2955	523	20239	4439	-0.12	0.8869	0.796767	0.987283	0.028	1	C09AA ACE inhibitors, plain [DG:DG01501]	0.154
p1yr	F	C09CA	3191	287	21932	2746	-0.198	0.8204	0.716738	0.938991	0.0041	1	C09CA Angiotensin II receptor blockers, plain [DG:DG01495]	0.0513
p1yr	F	C09DX	3470	8	24617	61	-0.0299	0.9705	0.457053	2.06079	0.94	0	C09DX Angiotensin II receptor blockers (ARBs), other combinations	0.966
p1yr	F	C10AA	2338	1140	15054	9624	-0.0433	0.9576	0.877845	1.04469	0.33	0	C10AA HMG CoA reductase inhibitors [DG:DG01660]	0.589
p1yr	F	C10AB	3463	15	24520	158	-0.2768	0.7582	0.441792	1.30111	0.32	0	C10AB Fibrates	0.589
p1yr	F	C10AC	3468	10	24587	91	-0.1381	0.871	0.448539	1.69129	0.68	0	C10AC Bile acid sequestrants	0.841
p1yr	F	C10AX	3437	41	24283	395	-0.1221	0.885	0.636236	1.23108	0.47	0	C10AX Other lipid modifying agents	0.696
p1yr	F	D01AC	3292	186	23314	1364	0.0114	1.0115	0.860272	1.18926	0.89	0	D01AC Imidazole and triazole derivatives	0.919
p1yr	F	D01AE	3440	38	24438	240	0.1686	1.1837	0.832585	1.68276	0.35	0	D01AE Other antifungals for topical use	0.601
p1yr	F	D01BA	3455	23	24577	101	0.4498	1.5679	0.98569	2.49413	0.058	0	D01BA Antifungals for systemic use	0.242
p1yr	F	D02AC	3418	60	24025	653	-0.2849	0.7521	0.573197	0.98672	0.04	1	D02AC Soft paraffin and fat products	0.188
p1yr	F	D02AE	3455	23	24450	228	-0.2479	0.7805	0.503069	1.21084	0.27	0	D02AE Carbamide products	0.557
p1yr	F	D02AX	3165	313	22329	2349	0.0735	1.0763	0.945962	1.22463	0.26	0	D02AX Other emollients and protectives	0.557
p1yr	F	D05AX	3441	37	24341	337	-0.1169	0.8897	0.629613	1.25711	0.51	0	D05AX Other antipsoriatics for topical use	0.736
p1yr	F	D06AX	3431	47	24242	436	-0.2568	0.7736	0.568035	1.05344	0.1	0	D06AX Other antibiotics for topical use	0.3
p1yr	F	D06BB	3468	10	24603	75	0.0157	1.0159	0.518688	1.9896	0.96	0	D06BB Antivirals	0.974
p1yr	F	D06BX	3458	20	24540	138	0.0466	1.0477	0.649626	1.68965	0.85	0	D06BX Other chemotherapeutics	0.913
p1yr	F	D07AA	3419	59	24170	508	-0.1132	0.893	0.677281	1.17737	0.42	0	D07AA Corticosteroids, weak (group I)	0.652
p1yr	F	D07AB	3422	56	24217	461	-0.0423	0.9586	0.720924	1.27459	0.77	0	D07AB Corticosteroids, moderately potent (group II)	0.871
p1yr	F	D07AC	3333	145	23369	1309	-0.1265	0.8812	0.736933	1.05368	0.17	0	D07AC Corticosteroids, potent (group III)	0.42
p1yr	F	D07AD	3425	53	24301	377	0.1617	1.1755	0.875263	1.57866	0.28	0	D07AD Corticosteroids, very potent (group IV)	0.558
p1yr	F	D07BC	3473	5	24612	66	-0.5852	0.557	0.221908	1.39814	0.21	0	D07BC Corticosteroids, potent, combinations with antiseptics	0.482
p1yr	F	D07CA	3456	22	24459	219	-0.2102	0.8105	0.518588	1.26658	0.36	0	D07CA Corticosteroids, weak, combinations with antibiotics	0.609
p1yr	F	D07CC	3417	61	24317	361	0.2926	1.3399	1.01286	1.7726	0.04	-1	D07CC Corticosteroids, potent, combinations with antibiotics	0.188
p1yr	F	D07CD	3461	17	24564	114	0.065	1.0672	0.633565	1.79761	0.81	0	D07CD Corticosteroids, very potent, combinations with antibiotics	0.907
p1yr	F	D09AA	3459	19	24571	107	0.4568	1.579	0.957146	2.60494	0.074	0	D09AA Medicated dressings with antiinfectives	0.277
p1yr	F	D10AF	3473	5	24641	37	-0.1303	0.8779	0.339628	2.26902	0.79	0	D10AF Antiinfectives for treatment of acne	0.889
p1yr	F	D11AC	3456	22	24538	140	0.1672	1.182	0.745349	1.87459	0.48	0	D11AC Medicated shampoos	0.701
p1yr	F	D11AH	3473	5	24629	49	-0.5028	0.6049	0.237639	1.53951	0.29	0	D11AH Agents for dermatitis, excluding corticosteroids	0.567
p1yr	F	D11AX	3471	7	24642	36	0.3931	1.4815	0.647276	3.39086	0.35	0	D11AX Other dermatologicals	0.601
p1yr	F	G01AF	3441	37	24357	321	-0.2028	0.8165	0.575307	1.15869	0.26	0	G01AF Imidazole derivatives	0.557
p1yr	F	G03AC	3471	7	24625	53	-0.6768	0.5082	0.229743	1.12435	0.095	0	G03AC Progestogens	0.293
p1yr	F	G03BA	3462	16	24584	94	0.0397	1.0405	0.602663	1.79648	0.89	0	G03BA 3-oxoandrosten (4) derivatives	0.919
p1yr	F	G03CA	3312	166	23114	1564	-0.3755	0.6869	0.57851	0.815709	1.8e-05	1	G03CA Natural and semisynthetic estrogens, plain	0.00081
p1yr	F	G03CX	3472	6	24638	40	-0.0892	0.9147	0.383086	2.18394	0.84	0	G03CX Other estrogens	0.913
p1yr	F	G03DA	3466	12	24602	76	-0.4486	0.6385	0.344943	1.18203	0.15	0	G03DA Pregnen (4) derivatives	0.388
p1yr	F	G03FA	3464	14	24614	64	0.0531	1.0545	0.585917	1.89792	0.86	0	G03FA Progestogens and estrogens, fixed combinations	0.913
p1yr	F	G03FB	3452	26	24576	102	0.1257	1.134	0.730402	1.7606	0.57	0	G03FB Progestogens and estrogens, sequential preparations	0.759
p1yr	F	G04BD	3363	115	23632	1046	-0.0705	0.9319	0.762504	1.13896	0.49	0	G04BD Urinary antispasmodics	0.711
p1yr	F	G04BE	3340	138	23676	1002	-0.0532	0.9482	0.784765	1.14566	0.58	0	G04BE Drugs used in erectile dysfunction	0.759
p1yr	F	G04CA	3462	16	24542	136	-0.0596	0.9421	0.55546	1.59802	0.82	0	G04CA Alpha-adrenoreceptor antagonists	0.909
p1yr	F	G04CB	3402	76	23788	890	-0.2329	0.7922	0.620832	1.01097	0.061	0	G04CB Testosterone-5-alpha reductase inhibitors	0.25
p1yr	F	H02AA	3468	10	24600	78	0.0673	1.0696	0.539929	2.11904	0.85	0	H02AA Mineralocorticoids	0.913
p1yr	F	H02AB	3201	277	22149	2529	-0.124	0.8834	0.770014	1.01346	0.077	0	H02AB Glucocorticoids	0.279
p1yr	F	H02BX	3455	23	24458	220	-0.2189	0.8034	0.518427	1.24491	0.33	0	H02BX Corticosteroids for systemic use, combinations	0.589
p1yr	F	H03AA	3228	250	22339	2339	-0.2075	0.8126	0.706072	0.935304	0.0038	1	H03AA Thyroid hormones	0.0503
p1yr	F	J01AA	3206	272	22636	2042	0.0741	1.077	0.938547	1.23577	0.29	0	J01AA Tetracyclines [DG:DG01197]	0.567
p1yr	F	J01CA	3024	454	21474	3204	0.1271	1.1355	1.01748	1.26716	0.023	-1	J01CA Penicillins with extended spectrum [DG:DG01780]	0.144
p1yr	F	J01CE	3444	34	24401	277	-0.2034	0.816	0.566793	1.17469	0.27	0	J01CE Beta-lactamase sensitive penicillins [DG:DG01778]	0.557
p1yr	F	J01CF	3241	237	23011	1667	0.0745	1.0774	0.932074	1.24537	0.31	0	J01CF Beta-lactamase resistant penicillins [DG:DG01779]	0.589
p1yr	F	J01CR	3382	96	23802	876	-0.1451	0.8649	0.695562	1.0755	0.19	0	J01CR Combinations of penicillins, incl. beta-lactamase inhibitors	0.46
p1yr	F	J01DB	3442	36	24265	413	-0.2984	0.742	0.523833	1.05104	0.093	0	J01DB First-generation cephalosporins [DG:DG01774]	0.293
p1yr	F	J01EA	3407	71	23888	790	-0.3	0.7408	0.576789	0.951492	0.019	1	J01EA Trimethoprim and derivatives [DG:DG01581]	0.13
p1yr	F	J01EE	3468	10	24569	109	-0.3661	0.6934	0.35982	1.33633	0.27	0	J01EE Combinations of sulfonamides and trimethoprim, incl. derivatives	0.557
p1yr	F	J01FA	3336	142	23470	1208	-0.0948	0.9096	0.757878	1.09166	0.31	0	J01FA Macrolides [DG:DG01551]	0.589
p1yr	F	J01FF	3465	13	24626	52	0.7154	2.045	1.09291	3.82649	0.025	-1	J01FF Lincosamides [DG:DG01578]	0.148
p1yr	F	J01MA	3445	33	24209	469	-0.5854	0.5569	0.389028	0.797198	0.0014	1	J01MA Fluoroquinolones [DG:DG01549]	0.0242
p1yr	F	J01XE	3199	279	22230	2448	-0.0735	0.9291	0.813398	1.06124	0.28	0	J01XE Nitrofuran derivatives	0.558
p1yr	F	J01XX	3471	7	24543	135	-0.8149	0.4427	0.205686	0.952729	0.037	1	J01XX Other antibacterials	0.181
p1yr	F	J02AC	3441	37	24384	294	-0.0532	0.9482	0.668515	1.34482	0.77	0	J02AC Triazole derivatives	0.871
p1yr	F	J05AB	3433	45	24306	372	-0.1442	0.8657	0.630839	1.18811	0.37	0	J05AB Nucleosides and nucleotides excl. reverse transcriptase inhibitors [DG:DG02840]	0.617
p1yr	F	J07AL	3464	14	24462	216	-0.7647	0.4655	0.269871	0.802892	0.006	1	J07AL Pneumococcal vaccines	0.0587
p1yr	F	J07AP	3467	11	24553	125	-0.5743	0.5631	0.301666	1.05118	0.071	0	J07AP Typhoid vaccines	0.275
p1yr	F	J07BB	3275	203	21650	3028	-0.6359	0.5295	0.456188	0.614491	5.9e-17	1	J07BB Influenza vaccines	1.33e-14
p1yr	F	J07BC	3472	6	24599	79	-0.7629	0.4663	0.201609	1.07861	0.075	0	J07BC Hepatitis vaccines	0.277
p1yr	F	J07CA	3453	25	24426	252	-0.4438	0.6416	0.422504	0.974366	0.037	1	J07CA Bacterial and viral vaccines, combined	0.181
p1yr	F	L01BC	3466	12	24439	239	-0.7413	0.4765	0.265705	0.854558	0.013	1	L01BC Pyrimidine analogues	0.0975
p1yr	F	L02AE	3460	18	24380	298	-0.5809	0.5594	0.345483	0.905839	0.018	1	L02AE Gonadotropin releasing hormone analogues	0.127
p1yr	F	L02BA	3469	9	24571	107	-0.6162	0.54	0.270457	1.07824	0.081	0	L02BA Anti-estrogens	0.28
p1yr	F	L02BG	3442	36	24339	339	-0.0881	0.9156	0.644086	1.30166	0.62	0	L02BG Aromatase inhibitors [DG:DG01596]	0.796
p1yr	F	L04AA	3470	8	24598	80	-0.3676	0.6924	0.330823	1.44921	0.33	0	L04AA Selective immunosuppressants	0.589
p1yr	F	L04AX	3438	40	24310	368	-0.1192	0.8876	0.635706	1.23929	0.48	0	L04AX Other immunosuppressants	0.701
p1yr	F	M01AB	3454	24	24507	171	-0.0827	0.9207	0.594714	1.42525	0.71	0	M01AB Acetic acid derivatives and related substances	0.845
p1yr	F	M01AE	3251	227	22720	1958	-0.2824	0.754	0.65227	0.871556	0.00013	1	M01AE Propionic acid derivatives	0.00418
p1yr	F	M01AH	3461	17	24538	140	-0.1451	0.865	0.518415	1.44313	0.58	0	M01AH Coxibs	0.759
p1yr	F	M02AA	3209	269	22561	2117	0.0835	1.0871	0.947103	1.24782	0.23	0	M02AA Antiinflammatory preparations, non-steroids for topical use	0.502
p1yr	F	M03BA	3472	6	24664	14	1.141	3.13	1.15681	8.46863	0.025	-1	M03BA Carbamic acid esters	0.148
p1yr	F	M03BX	3464	14	24531	147	-0.4091	0.6643	0.380323	1.16016	0.15	0	M03BX Other centrally acting agents	0.388
[truncated: 3,450 more rows]
