# Supplementary material for: Exploring Drugs and Vaccines Associated with Altered Risks and Severity of COVID-19: A UK Biobank Cohort Study of All ATC Level-4 Drug Categories Reveals Repositioning Opportunities
Source: Pharmaceutics. 2021 Sep 18;13(9):1514. doi: 10.3390/pharmaceutics13091514 (PMC8471264; doi:10.3390/pharmaceutics13091514)
Supplement: Supplementary file 1 [file pharmaceutics-13-01514-s001.zip › TableS8-CompleteCovar-GP-available-no-IPW-int-rm-all-vaccine-p6m-rm-epv.xlsx]

## Sheet: TableS12-CompleteCovar-GP-avail
Windows	Model	drug	case_notx	case_tx	ctrl_notx	ctrl_tx	estimate	OR	lower_CI_OR	upper_CI_OR	p	sig	Full name	p.adj
p6m	A	A01AB	1146	25	2277	30	0.3117	1.3657	0.770179	2.42198	0.29	0	A01AB Antiinfectives and antiseptics for local oral treatment	0.461
p6m	A	A01AB	1127	44	2243	64	0.0957	1.1004	0.725613	1.66877	0.65	0	A01AB Antiinfectives and antiseptics for local oral treatment	0.761
p6m	A	A01AB	1021	150	2055	252	0.0645	1.0666	0.845326	1.34593	0.59	0	A01AB Antiinfectives and antiseptics for local oral treatment	0.761
p6m	A	A01AB	1097	74	2176	131	-0.0258	0.9746	0.709864	1.33797	0.87	0	A01AB Antiinfectives and antiseptics for local oral treatment	0.928
p6m	B	A01AB	137	10	3136	195	0.0745	1.0773	0.532431	2.17997	0.84	0	A01AB Antiinfectives and antiseptics for local oral treatment	0.913
p6m	B	A01AB	130	17	2946	385	-0.0207	0.9795	0.564733	1.69903	0.94	0	A01AB Antiinfectives and antiseptics for local oral treatment	0.971
p6m	C	A01AB	1146	25	360379	2157	0.9241	2.5196	1.6811	3.77645	7.6e-06	-1	A01AB Antiinfectives and antiseptics for local oral treatment	2.57e-05
p6m	C	A01AB	1127	44	355496	7040	0.4307	1.5383	1.13345	2.08779	0.0057	-1	A01AB Antiinfectives and antiseptics for local oral treatment	0.0153
p6m	C	A01AB	1021	150	329941	32595	0.18	1.1972	1.00545	1.42561	0.043	-1	A01AB Antiinfectives and antiseptics for local oral treatment	0.104
p6m	C	A01AB	1097	74	347604	14932	0.236	1.2662	0.997577	1.60704	0.052	0	A01AB Antiinfectives and antiseptics for local oral treatment	0.108
p6m	D	A01AB	137	10	347604	14932	0.3037	1.3549	0.70949	2.58747	0.36	0	A01AB Antiinfectives and antiseptics for local oral treatment	0.462
p6m	D	A01AB	130	17	329941	32595	0.0216	1.0219	0.612537	1.70477	0.93	0	A01AB Antiinfectives and antiseptics for local oral treatment	0.974
p6m	E	A01AB	3423	55	360379	2157	0.859	2.3607	1.79665	3.10184	7e-10	-1	A01AB Antiinfectives and antiseptics for local oral treatment	4.6e-09
p6m	E	A01AB	3273	205	347604	14932	0.3055	1.3573	1.17606	1.56639	2.9e-05	-1	A01AB Antiinfectives and antiseptics for local oral treatment	0.000176
p6m	E	A01AB	3370	108	355496	7040	0.396	1.4858	1.22304	1.80508	6.7e-05	-1	A01AB Antiinfectives and antiseptics for local oral treatment	0.000368
p6m	E	A01AB	3076	402	329941	32595	0.2026	1.2246	1.10151	1.36147	0.00018	-1	A01AB Antiinfectives and antiseptics for local oral treatment	0.00111
p6m	F	A01AB	3273	205	23257	1421	0.0717	1.0744	0.920962	1.25332	0.36	0	A01AB Antiinfectives and antiseptics for local oral treatment	0.614
p6m	F	A01AB	3423	55	24315	363	0.1601	1.1737	0.87702	1.57064	0.28	0	A01AB Antiinfectives and antiseptics for local oral treatment	0.634
p6m	F	A01AB	3076	402	21760	2918	0.0225	1.0228	0.9129	1.14584	0.7	0	A01AB Antiinfectives and antiseptics for local oral treatment	0.843
p6m	F	A01AB	3370	108	23895	783	0.0321	1.0326	0.838312	1.27197	0.76	0	A01AB Antiinfectives and antiseptics for local oral treatment	0.871
p6m	G	A01AB	1146	25	24315	363	0.2803	1.3235	0.874269	2.00352	0.18	0	A01AB Antiinfectives and antiseptics for local oral treatment	0.383
p6m	G	A01AB	1127	44	23895	783	0.0669	1.0692	0.781476	1.46286	0.68	0	A01AB Antiinfectives and antiseptics for local oral treatment	0.85
p6m	G	A01AB	1021	150	21760	2918	0.0215	1.0217	0.854482	1.22172	0.81	0	A01AB Antiinfectives and antiseptics for local oral treatment	0.924
p6m	G	A01AB	1097	74	23257	1421	0.0093	1.0094	0.790237	1.28926	0.94	0	A01AB Antiinfectives and antiseptics for local oral treatment	0.968
p6m	H	A01AB	130	17	21760	2918	-0.1248	0.8827	0.526932	1.47867	0.64	0	A01AB Antiinfectives and antiseptics for local oral treatment	0.818
p6m	H	A01AB	137	10	23257	1421	0.085	1.0887	0.566512	2.09229	0.8	0	A01AB Antiinfectives and antiseptics for local oral treatment	0.889
p6m	A	A01AC	1165	6	2300	7	0.4158	1.5156	0.482897	4.7571	0.48	0	A01AC Corticosteroids for local oral treatment	0.681
p6m	C	A01AC	1165	6	361328	1208	0.2171	1.2425	0.553236	2.79046	0.6	0	A01AC Corticosteroids for local oral treatment	0.755
p6m	E	A01AC	3465	13	361328	1208	0.0407	1.0415	0.600107	1.80763	0.89	0	A01AC Corticosteroids for local oral treatment	0.94
p6m	F	A01AC	3465	13	24522	156	-0.3897	0.6772	0.381681	1.20168	0.18	0	A01AC Corticosteroids for local oral treatment	0.395
p6m	G	A01AC	1165	6	24522	156	-0.2011	0.8178	0.359022	1.8629	0.63	0	A01AC Corticosteroids for local oral treatment	0.872
p6m	A	A01AD	1155	16	2297	10	0.7907	2.205	0.957916	5.07555	0.063	0	A01AD Other agents for local oral treatment	0.211
p6m	A	A01AD	1160	11	2302	5	1.0093	2.7436	0.895379	8.4069	0.077	0	A01AD Other agents for local oral treatment	0.229
p6m	A	A01AD	1149	22	2285	22	0.3525	1.4227	0.758326	2.66907	0.27	0	A01AD Other agents for local oral treatment	0.491
p6m	A	A01AD	1116	55	2241	66	0.1105	1.1168	0.74877	1.66577	0.59	0	A01AD Other agents for local oral treatment	0.761
p6m	B	A01AD	141	6	3216	115	-0.0165	0.9836	0.40368	2.39663	0.97	0	A01AD Other agents for local oral treatment	0.986
p6m	C	A01AD	1160	11	362037	499	1.4363	4.2052	2.26412	7.81025	5.4e-06	-1	A01AD Other agents for local oral treatment	1.91e-05
p6m	C	A01AD	1155	16	361175	1361	0.8975	2.4535	1.48008	4.06706	0.0005	-1	A01AD Other agents for local oral treatment	0.00178
p6m	C	A01AD	1116	55	354640	7896	0.4583	1.5815	1.19837	2.087	0.0012	-1	A01AD Other agents for local oral treatment	0.00486
p6m	C	A01AD	1149	22	359824	2712	0.5424	1.7201	1.11771	2.6471	0.014	-1	A01AD Other agents for local oral treatment	0.0385
p6m	D	A01AD	141	6	354640	7896	0.4079	1.5036	0.657417	3.43888	0.33	0	A01AD Other agents for local oral treatment	0.529
p6m	E	A01AD	3462	16	362037	499	1.0285	2.797	1.68166	4.65197	7.4e-05	-1	A01AD Other agents for local oral treatment	0.000243
p6m	E	A01AD	3357	121	354640	7896	0.3335	1.3958	1.15925	1.68066	0.00043	-1	A01AD Other agents for local oral treatment	0.00234
p6m	E	A01AD	3452	26	361175	1361	0.5422	1.7197	1.15955	2.5505	0.007	-1	A01AD Other agents for local oral treatment	0.0239
p6m	E	A01AD	3434	44	359824	2712	0.3634	1.4383	1.06189	1.94805	0.019	-1	A01AD Other agents for local oral treatment	0.0599
p6m	F	A01AD	3462	16	24580	98	0.2376	1.2682	0.735767	2.18579	0.39	0	A01AD Other agents for local oral treatment	0.716
p6m	F	A01AD	3434	44	24323	355	-0.0868	0.9168	0.66413	1.26572	0.6	0	A01AD Other agents for local oral treatment	0.795
p6m	F	A01AD	3357	121	23842	836	0.0468	1.0479	0.857913	1.28003	0.65	0	A01AD Other agents for local oral treatment	0.818
p6m	F	A01AD	3452	26	24480	198	-0.0333	0.9673	0.635892	1.47139	0.88	0	A01AD Other agents for local oral treatment	0.919
p6m	G	A01AD	1160	11	24580	98	0.6673	1.9489	1.01687	3.73526	0.044	-1	A01AD Other agents for local oral treatment	0.182
p6m	G	A01AD	1155	16	24480	198	0.3661	1.4422	0.851955	2.44128	0.17	0	A01AD Other agents for local oral treatment	0.408
p6m	G	A01AD	1116	55	23842	836	0.1941	1.2142	0.911575	1.61731	0.18	0	A01AD Other agents for local oral treatment	0.521
p6m	G	A01AD	1149	22	24323	355	0.1135	1.1202	0.71785	1.74801	0.62	0	A01AD Other agents for local oral treatment	0.845
p6m	H	A01AD	141	6	23842	836	0.2005	1.222	0.530186	2.81649	0.64	0	A01AD Other agents for local oral treatment	0.818
p6m	A	A02BA	1142	29	2293	14	1.115	3.0496	1.53772	6.05041	0.0014	-1	A02BA H2-receptor antagonists [DG:DG01481]	0.0103
p6m	A	A02BA	1123	48	2271	36	0.6714	1.957	1.2257	3.12439	0.0049	-1	A02BA H2-receptor antagonists [DG:DG01481]	0.0383
p6m	A	A02BA	1107	64	2229	78	0.2878	1.3335	0.927126	1.91814	0.12	0	A02BA H2-receptor antagonists [DG:DG01481]	0.382
p6m	A	A02BA	1073	98	2175	132	0.1996	1.2209	0.910822	1.63645	0.18	0	A02BA H2-receptor antagonists [DG:DG01481]	0.454
p6m	B	A02BA	141	6	3294	37	0.8888	2.4323	0.924593	6.39849	0.072	0	A02BA H2-receptor antagonists [DG:DG01481]	0.163
p6m	B	A02BA	141	6	3253	78	0.233	1.2624	0.511569	3.11509	0.61	0	A02BA H2-receptor antagonists [DG:DG01481]	0.735
p6m	B	A02BA	136	11	3112	219	-0.0374	0.9633	0.490662	1.89105	0.91	0	A02BA H2-receptor antagonists [DG:DG01481]	0.964
p6m	B	A02BA	140	7	3196	135	-0.0336	0.9669	0.425293	2.19841	0.94	0	A02BA H2-receptor antagonists [DG:DG01481]	0.969
p6m	C	A02BA	1142	29	359842	2694	0.7102	2.0345	1.39294	2.97155	0.00024	-1	A02BA H2-receptor antagonists [DG:DG01481]	0.000623
p6m	C	A02BA	1123	48	356214	6322	0.411	1.5084	1.1195	2.0323	0.0069	-1	A02BA H2-receptor antagonists [DG:DG01481]	0.018
p6m	C	A02BA	1107	64	351780	10756	0.2477	1.2811	0.988442	1.6603	0.061	0	A02BA H2-receptor antagonists [DG:DG01481]	0.12
p6m	C	A02BA	1073	98	343872	18664	0.1878	1.2067	0.974911	1.49348	0.084	0	A02BA H2-receptor antagonists [DG:DG01481]	0.172
p6m	D	A02BA	141	6	359842	2694	1.0283	2.7963	1.19173	6.56127	0.018	-1	A02BA H2-receptor antagonists [DG:DG01481]	0.0312
p6m	D	A02BA	141	6	356214	6322	0.1564	1.1693	0.503197	2.71693	0.72	0	A02BA H2-receptor antagonists [DG:DG01481]	0.745
p6m	D	A02BA	140	7	351780	10756	-0.1088	0.8969	0.412072	1.95201	0.78	0	A02BA H2-receptor antagonists [DG:DG01481]	0.839
p6m	D	A02BA	136	11	343872	18664	-0.1	0.9048	0.482082	1.69819	0.76	0	A02BA H2-receptor antagonists [DG:DG01481]	0.857
p6m	E	A02BA	3248	230	343872	18664	0.173	1.1888	1.03575	1.36455	0.014	-1	A02BA H2-receptor antagonists [DG:DG01481]	0.0455
p6m	E	A02BA	3336	142	351780	10756	0.2146	1.2394	1.04286	1.47298	0.015	-1	A02BA H2-receptor antagonists [DG:DG01481]	0.0491
p6m	E	A02BA	3435	43	359842	2694	0.3144	1.3695	1.00664	1.86303	0.045	-1	A02BA H2-receptor antagonists [DG:DG01481]	0.0806
p6m	E	A02BA	3394	84	356214	6322	0.1682	1.1832	0.947366	1.47764	0.14	0	A02BA H2-receptor antagonists [DG:DG01481]	0.276
p6m	F	A02BA	3248	230	22513	2165	-0.2206	0.8021	0.693929	0.927044	0.0028	1	A02BA H2-receptor antagonists [DG:DG01481]	0.0316
p6m	F	A02BA	3394	84	23741	937	-0.3505	0.7044	0.559206	0.887189	0.0029	1	A02BA H2-receptor antagonists [DG:DG01481]	0.0435
p6m	F	A02BA	3435	43	24149	529	-0.4415	0.6431	0.467789	0.884081	0.0066	1	A02BA H2-receptor antagonists [DG:DG01481]	0.0758
p6m	F	A02BA	3336	142	23291	1387	-0.2414	0.7855	0.655662	0.941051	0.0088	1	A02BA H2-receptor antagonists [DG:DG01481]	0.0781
p6m	G	A02BA	1073	98	22513	2165	-0.1548	0.8566	0.689788	1.06367	0.16	0	A02BA H2-receptor antagonists [DG:DG01481]	0.505
p6m	G	A02BA	1107	64	23291	1387	-0.1463	0.8639	0.664235	1.12348	0.28	0	A02BA H2-receptor antagonists [DG:DG01481]	0.583
p6m	G	A02BA	1123	48	23741	937	-0.0553	0.9462	0.699539	1.27987	0.72	0	A02BA H2-receptor antagonists [DG:DG01481]	0.876
p6m	G	A02BA	1142	29	24149	529	0.0019	1.0019	0.681825	1.4722	0.99	0	A02BA H2-receptor antagonists [DG:DG01481]	0.996
p6m	H	A02BA	141	6	24149	529	0.4724	1.6038	0.690943	3.72257	0.27	0	A02BA H2-receptor antagonists [DG:DG01481]	0.383
p6m	H	A02BA	140	7	23291	1387	-0.359	0.6984	0.321731	1.51594	0.36	0	A02BA H2-receptor antagonists [DG:DG01481]	0.6
p6m	H	A02BA	136	11	22513	2165	-0.3283	0.7201	0.383034	1.35387	0.31	0	A02BA H2-receptor antagonists [DG:DG01481]	0.652
p6m	H	A02BA	141	6	23741	937	-0.1516	0.8594	0.372048	1.98493	0.72	0	A02BA H2-receptor antagonists [DG:DG01481]	0.781
p6m	A	A02BC	769	402	1597	710	-0.2597	0.7713	0.650943	0.913908	0.0027	1	A02BC Proton pump inhibitors [DG:DG01646]	0.0277
p6m	A	A02BC	706	465	1454	853	-0.2503	0.7786	0.661825	0.915969	0.0025	1	A02BC Proton pump inhibitors [DG:DG01646]	0.0331
p6m	A	A02BC	552	619	1163	1144	-0.1688	0.8447	0.7224	0.987649	0.034	1	A02BC Proton pump inhibitors [DG:DG01646]	0.209
p6m	A	A02BC	826	345	1776	531	-0.1202	0.8867	0.740783	1.06146	0.19	0	A02BC Proton pump inhibitors [DG:DG01646]	0.364
p6m	B	A02BC	93	54	2509	822	0.1561	1.169	0.799672	1.70887	0.42	0	A02BC Proton pump inhibitors [DG:DG01646]	0.574
p6m	B	A02BC	84	63	2076	1255	-0.0666	0.9356	0.649012	1.34866	0.72	0	A02BC Proton pump inhibitors [DG:DG01646]	0.837
p6m	B	A02BC	64	83	1651	1680	-0.0449	0.9561	0.662906	1.37903	0.81	0	A02BC Proton pump inhibitors [DG:DG01646]	0.916
p6m	B	A02BC	90	57	2276	1055	-0.0298	0.9706	0.668875	1.4085	0.88	0	A02BC Proton pump inhibitors [DG:DG01646]	0.922
p6m	C	A02BC	826	345	296958	65578	0.2183	1.244	1.08524	1.42588	0.0017	-1	A02BC Proton pump inhibitors [DG:DG01646]	0.00371
p6m	C	A02BC	706	465	241154	121382	-0.1201	0.8868	0.781413	1.00643	0.063	0	A02BC Proton pump inhibitors [DG:DG01646]	0.122
p6m	C	A02BC	769	402	262319	100217	-0.1158	0.8906	0.7808	1.01587	0.085	0	A02BC Proton pump inhibitors [DG:DG01646]	0.144
p6m	C	A02BC	552	619	197587	164949	-0.0307	0.9697	0.858161	1.09583	0.62	0	A02BC Proton pump inhibitors [DG:DG01646]	0.761
p6m	D	A02BC	93	54	296958	65578	0.2882	1.334	0.932768	1.90778	0.11	0	A02BC Proton pump inhibitors [DG:DG01646]	0.145
p6m	D	A02BC	84	63	241154	121382	-0.2273	0.7967	0.562257	1.1288	0.2	0	A02BC Proton pump inhibitors [DG:DG01646]	0.317
p6m	D	A02BC	90	57	262319	100217	-0.1755	0.839	0.587685	1.1979	0.33	0	A02BC Proton pump inhibitors [DG:DG01646]	0.432
p6m	D	A02BC	64	83	197587	164949	-0.0987	0.906	0.643039	1.27663	0.57	0	A02BC Proton pump inhibitors [DG:DG01646]	0.721
p6m	E	A02BC	2602	876	296958	65578	0.3352	1.3982	1.28623	1.51991	3.5e-15	-1	A02BC Proton pump inhibitors [DG:DG01646]	3.28e-14
p6m	E	A02BC	1715	1763	197587	164949	0.1475	1.1589	1.07974	1.24387	4.4e-05	-1	A02BC Proton pump inhibitors [DG:DG01646]	0.000304
p6m	E	A02BC	2160	1318	241154	121382	0.1079	1.1139	1.03451	1.19938	0.0043	-1	A02BC Proton pump inhibitors [DG:DG01646]	0.0178
p6m	E	A02BC	2366	1112	262319	100217	0.1112	1.1177	1.03408	1.20802	0.005	-1	A02BC Proton pump inhibitors [DG:DG01646]	0.0179
p6m	F	A02BC	2602	876	16225	8453	-0.3093	0.734	0.67328	0.800122	2.1e-12	1	A02BC Proton pump inhibitors [DG:DG01646]	4.14e-10
p6m	F	A02BC	2366	1112	14530	10148	-0.278	0.7573	0.698701	0.820761	1.3e-11	1	A02BC Proton pump inhibitors [DG:DG01646]	1.46e-09
p6m	F	A02BC	2160	1318	13104	11574	-0.2554	0.7746	0.71699	0.83691	9.6e-11	1	A02BC Proton pump inhibitors [DG:DG01646]	7.97e-09
p6m	F	A02BC	1715	1763	10382	14296	-0.1696	0.844	0.783003	0.909701	9.3e-06	1	A02BC Proton pump inhibitors [DG:DG01646]	0.000526
p6m	G	A02BC	706	465	13104	11574	-0.4049	0.6671	0.588112	0.7566	3e-10	1	A02BC Proton pump inhibitors [DG:DG01646]	3.81e-08
p6m	G	A02BC	769	402	14530	10148	-0.4146	0.6606	0.579985	0.752398	4.2e-10	1	A02BC Proton pump inhibitors [DG:DG01646]	7.77e-08
p6m	G	A02BC	826	345	16225	8453	-0.3496	0.705	0.615428	0.807562	4.6e-07	1	A02BC Proton pump inhibitors [DG:DG01646]	9.54e-06
p6m	G	A02BC	552	619	10382	14296	-0.283	0.7535	0.666354	0.852079	6.4e-06	1	A02BC Proton pump inhibitors [DG:DG01646]	0.000222
p6m	H	A02BC	84	63	13104	11574	-0.4154	0.6601	0.468159	0.930742	0.018	1	A02BC Proton pump inhibitors [DG:DG01646]	0.0621
p6m	H	A02BC	90	57	14530	10148	-0.3635	0.6953	0.4901	0.986337	0.042	1	A02BC Proton pump inhibitors [DG:DG01646]	0.121
p6m	H	A02BC	93	54	16225	8453	-0.1886	0.8281	0.581037	1.1802	0.3	0	A02BC Proton pump inhibitors [DG:DG01646]	0.418
p6m	H	A02BC	64	83	10382	14296	-0.2649	0.7673	0.545397	1.07942	0.13	0	A02BC Proton pump inhibitors [DG:DG01646]	0.436
p6m	A	A02BX	1124	47	2226	81	-0.3041	0.7378	0.494649	1.10033	0.14	0	A02BX Other drugs for peptic ulcer and gastro-oesophageal reflux disease (GORD)	0.338
p6m	A	A02BX	1098	73	2192	115	-0.218	0.8041	0.577712	1.11935	0.2	0	A02BX Other drugs for peptic ulcer and gastro-oesophageal reflux disease (GORD)	0.431
p6m	A	A02BX	1040	131	2107	200	-0.1277	0.8801	0.682128	1.13548	0.33	0	A02BX Other drugs for peptic ulcer and gastro-oesophageal reflux disease (GORD)	0.585
p6m	A	A02BX	1134	37	2253	54	-0.1471	0.8632	0.5449	1.36743	0.53	0	A02BX Other drugs for peptic ulcer and gastro-oesophageal reflux disease (GORD)	0.7
p6m	B	A02BX	139	8	3248	83	0.487	1.6274	0.733522	3.61046	0.23	0	A02BX Other drugs for peptic ulcer and gastro-oesophageal reflux disease (GORD)	0.394
p6m	B	A02BX	137	10	3213	118	0.3889	1.4753	0.719649	3.02447	0.29	0	A02BX Other drugs for peptic ulcer and gastro-oesophageal reflux disease (GORD)	0.47
p6m	B	A02BX	129	18	3018	313	-0.1688	0.8447	0.488941	1.45924	0.55	0	A02BX Other drugs for peptic ulcer and gastro-oesophageal reflux disease (GORD)	0.812
p6m	B	A02BX	135	12	3155	176	0.0469	1.048	0.546198	2.01074	0.89	0	A02BX Other drugs for peptic ulcer and gastro-oesophageal reflux disease (GORD)	0.937
p6m	C	A02BX	1134	37	358240	4296	0.5521	1.737	1.24051	2.43214	0.0013	-1	A02BX Other drugs for peptic ulcer and gastro-oesophageal reflux disease (GORD)	0.00292
p6m	C	A02BX	1040	131	339354	23182	0.2299	1.2584	1.04098	1.52131	0.018	-1	A02BX Other drugs for peptic ulcer and gastro-oesophageal reflux disease (GORD)	0.0486
p6m	C	A02BX	1098	73	350119	12417	0.2257	1.2533	0.981391	1.60043	0.07	0	A02BX Other drugs for peptic ulcer and gastro-oesophageal reflux disease (GORD)	0.132
p6m	C	A02BX	1124	47	353969	8567	0.1278	1.1363	0.842273	1.53296	0.4	0	A02BX Other drugs for peptic ulcer and gastro-oesophageal reflux disease (GORD)	0.536
p6m	D	A02BX	139	8	358240	4296	0.9607	2.6134	1.24881	5.46923	0.011	-1	A02BX Other drugs for peptic ulcer and gastro-oesophageal reflux disease (GORD)	0.0204
p6m	D	A02BX	137	10	353969	8567	0.4923	1.6361	0.842582	3.17707	0.15	0	A02BX Other drugs for peptic ulcer and gastro-oesophageal reflux disease (GORD)	0.226
p6m	D	A02BX	135	12	350119	12417	0.3046	1.3561	0.737251	2.49454	0.33	0	A02BX Other drugs for peptic ulcer and gastro-oesophageal reflux disease (GORD)	0.458
p6m	D	A02BX	129	18	339354	23182	0.095	1.0997	0.658503	1.83633	0.72	0	A02BX Other drugs for peptic ulcer and gastro-oesophageal reflux disease (GORD)	0.842
p6m	E	A02BX	3387	91	358240	4296	0.6874	1.9885	1.60364	2.46569	3.8e-10	-1	A02BX Other drugs for peptic ulcer and gastro-oesophageal reflux disease (GORD)	2.67e-09
p6m	E	A02BX	3147	331	339354	23182	0.3432	1.4095	1.25216	1.58664	1.3e-08	-1	A02BX Other drugs for peptic ulcer and gastro-oesophageal reflux disease (GORD)	1.84e-07
p6m	E	A02BX	3290	188	350119	12417	0.3858	1.4708	1.26306	1.71268	6.8e-07	-1	A02BX Other drugs for peptic ulcer and gastro-oesophageal reflux disease (GORD)	6.51e-06
p6m	E	A02BX	3350	128	353969	8567	0.3604	1.4339	1.19529	1.72025	0.0001	-1	A02BX Other drugs for peptic ulcer and gastro-oesophageal reflux disease (GORD)	0.000536
p6m	F	A02BX	3147	331	22081	2597	0.0271	1.0275	0.906424	1.16469	0.67	0	A02BX Other drugs for peptic ulcer and gastro-oesophageal reflux disease (GORD)	0.828
p6m	F	A02BX	3387	91	23961	717	0.0543	1.0558	0.841902	1.32401	0.64	0	A02BX Other drugs for peptic ulcer and gastro-oesophageal reflux disease (GORD)	0.846
p6m	F	A02BX	3350	128	23595	1083	-0.0313	0.9692	0.800181	1.17388	0.75	0	A02BX Other drugs for peptic ulcer and gastro-oesophageal reflux disease (GORD)	0.865
p6m	F	A02BX	3290	188	23172	1506	0.0093	1.0094	0.859431	1.18547	0.91	0	A02BX Other drugs for peptic ulcer and gastro-oesophageal reflux disease (GORD)	0.956
p6m	G	A02BX	1124	47	23595	1083	-0.201	0.8179	0.603235	1.10889	0.2	0	A02BX Other drugs for peptic ulcer and gastro-oesophageal reflux disease (GORD)	0.457
p6m	G	A02BX	1098	73	23172	1506	-0.0875	0.9162	0.714425	1.1749	0.49	0	A02BX Other drugs for peptic ulcer and gastro-oesophageal reflux disease (GORD)	0.801
p6m	G	A02BX	1040	131	22081	2597	-0.0437	0.9572	0.789302	1.16083	0.66	0	A02BX Other drugs for peptic ulcer and gastro-oesophageal reflux disease (GORD)	0.872
p6m	G	A02BX	1134	37	23961	717	-0.0225	0.9777	0.694131	1.37715	0.9	0	A02BX Other drugs for peptic ulcer and gastro-oesophageal reflux disease (GORD)	0.982
p6m	H	A02BX	139	8	23961	717	0.4518	1.5711	0.753692	3.27492	0.23	0	A02BX Other drugs for peptic ulcer and gastro-oesophageal reflux disease (GORD)	0.374
p6m	H	A02BX	137	10	23595	1083	0.2515	1.286	0.66207	2.49794	0.46	0	A02BX Other drugs for peptic ulcer and gastro-oesophageal reflux disease (GORD)	0.577
p6m	H	A02BX	135	12	23172	1506	0.1079	1.114	0.605819	2.04833	0.73	0	A02BX Other drugs for peptic ulcer and gastro-oesophageal reflux disease (GORD)	0.849
p6m	H	A02BX	129	18	22081	2597	-0.0607	0.9411	0.563593	1.57149	0.82	0	A02BX Other drugs for peptic ulcer and gastro-oesophageal reflux disease (GORD)	0.933
p6m	A	A03AA	1134	37	2212	95	-0.3175	0.728	0.483182	1.09685	0.13	0	A03AA Synthetic anticholinergics, esters with tertiary amino group	0.388
p6m	A	A03AA	1154	17	2266	41	-0.2247	0.7988	0.436954	1.46014	0.47	0	A03AA Synthetic anticholinergics, esters with tertiary amino group	0.655
p6m	A	A03AA	1155	16	2279	28	0.0517	1.0531	0.545284	2.03369	0.88	0	A03AA Synthetic anticholinergics, esters with tertiary amino group	0.908
p6m	A	A03AA	1160	11	2290	17	0.067	1.0693	0.473984	2.4122	0.87	0	A03AA Synthetic anticholinergics, esters with tertiary amino group	0.916
p6m	C	A03AA	1154	17	356777	5759	-0.2991	0.7415	0.457068	1.20288	0.23	0	A03AA Synthetic anticholinergics, esters with tertiary amino group	0.348
p6m	C	A03AA	1134	37	351019	11517	-0.1634	0.8493	0.609161	1.18401	0.34	0	A03AA Synthetic anticholinergics, esters with tertiary amino group	0.478
p6m	C	A03AA	1160	11	360580	1956	0.1804	1.1977	0.654603	2.19146	0.56	0	A03AA Synthetic anticholinergics, esters with tertiary amino group	0.641
p6m	C	A03AA	1155	16	358776	3760	0.0158	1.0159	0.616092	1.67522	0.95	0	A03AA Synthetic anticholinergics, esters with tertiary amino group	0.96
p6m	E	A03AA	3450	28	360580	1956	0.2537	1.2888	0.882738	1.88155	0.19	0	A03AA Synthetic anticholinergics, esters with tertiary amino group	0.262
p6m	E	A03AA	3346	132	351019	11517	0.1218	1.1296	0.946245	1.3484	0.18	0	A03AA Synthetic anticholinergics, esters with tertiary amino group	0.314
p6m	E	A03AA	3434	44	358776	3760	0.1021	1.1074	0.81883	1.49779	0.51	0	A03AA Synthetic anticholinergics, esters with tertiary amino group	0.687
p6m	E	A03AA	3420	58	356777	5759	-0.0252	0.9751	0.749512	1.26866	0.85	0	A03AA Synthetic anticholinergics, esters with tertiary amino group	0.928
p6m	F	A03AA	3420	58	24061	617	-0.3468	0.7069	0.536475	0.931545	0.014	1	A03AA Synthetic anticholinergics, esters with tertiary amino group	0.0996
p6m	F	A03AA	3346	132	23482	1196	-0.2099	0.8107	0.672269	0.977576	0.028	1	A03AA Synthetic anticholinergics, esters with tertiary amino group	0.155
p6m	F	A03AA	3434	44	24253	425	-0.2536	0.776	0.564746	1.06622	0.12	0	A03AA Synthetic anticholinergics, esters with tertiary amino group	0.333
p6m	F	A03AA	3450	28	24383	295	-0.3263	0.7216	0.485883	1.07167	0.11	0	A03AA Synthetic anticholinergics, esters with tertiary amino group	0.394
p6m	G	A03AA	1134	37	23482	1196	-0.4592	0.6318	0.451188	0.884717	0.0075	1	A03AA Synthetic anticholinergics, esters with tertiary amino group	0.0868
p6m	G	A03AA	1154	17	24061	617	-0.5624	0.5698	0.349355	0.929447	0.024	1	A03AA Synthetic anticholinergics, esters with tertiary amino group	0.141
p6m	G	A03AA	1155	16	24253	425	-0.2624	0.7692	0.463065	1.27774	0.31	0	A03AA Synthetic anticholinergics, esters with tertiary amino group	0.562
p6m	G	A03AA	1160	11	24383	295	-0.2859	0.7513	0.408036	1.38352	0.36	0	A03AA Synthetic anticholinergics, esters with tertiary amino group	0.589
p6m	E	A03AB	3473	5	362272	264	0.4061	1.5009	0.616268	3.65552	0.37	0	A03AB Synthetic anticholinergics, quaternary ammonium compounds	0.503
p6m	F	A03AB	3473	5	24640	38	0.0422	1.0431	0.40337	2.69747	0.93	0	A03AB Synthetic anticholinergics, quaternary ammonium compounds	0.971
p6m	A	A03AX	1165	6	2290	17	-0.5699	0.5656	0.208701	1.53284	0.26	0	A03AX Other drugs for functional gastrointestinal disorders	0.491
p6m	A	A03AX	1166	5	2295	12	-0.5292	0.5891	0.191992	1.80734	0.35	0	A03AX Other drugs for functional gastrointestinal disorders	0.552
p6m	A	A03AX	1143	28	2268	39	0.1609	1.1746	0.697022	1.97911	0.55	0	A03AX Other drugs for functional gastrointestinal disorders	0.743
p6m	A	A03AX	1166	5	2299	8	-0.1129	0.8932	0.263763	3.02513	0.86	0	A03AX Other drugs for functional gastrointestinal disorders	0.916
p6m	C	A03AX	1165	6	359968	2568	-0.6163	0.5399	0.240513	1.21206	0.14	0	A03AX Other drugs for functional gastrointestinal disorders	0.242
p6m	C	A03AX	1143	28	357088	5448	0.2098	1.2334	0.841107	1.8086	0.28	0	A03AX Other drugs for functional gastrointestinal disorders	0.412
p6m	C	A03AX	1166	5	360983	1553	-0.3695	0.6911	0.284505	1.67872	0.41	0	A03AX Other drugs for functional gastrointestinal disorders	0.542
p6m	C	A03AX	1166	5	361747	789	0.1985	1.2195	0.497469	2.98963	0.66	0	A03AX Other drugs for functional gastrointestinal disorders	0.721
p6m	E	A03AX	3465	13	361747	789	0.3513	1.4209	0.815586	2.47529	0.21	0	A03AX Other drugs for functional gastrointestinal disorders	0.281
p6m	E	A03AX	3411	67	357088	5448	0.1714	1.187	0.927942	1.51838	0.17	0	A03AX Other drugs for functional gastrointestinal disorders	0.304
p6m	E	A03AX	3455	23	359968	2568	-0.1682	0.8451	0.5584	1.27914	0.43	0	A03AX Other drugs for functional gastrointestinal disorders	0.598
p6m	E	A03AX	3461	17	360983	1553	-0.0076	0.9924	0.612511	1.60785	0.97	0	A03AX Other drugs for functional gastrointestinal disorders	0.983
p6m	F	A03AX	3455	23	24361	317	-0.541	0.5822	0.378879	0.894511	0.014	1	A03AX Other drugs for functional gastrointestinal disorders	0.0996
p6m	F	A03AX	3461	17	24465	213	-0.4452	0.6407	0.388119	1.05755	0.082	0	A03AX Other drugs for functional gastrointestinal disorders	0.28
p6m	F	A03AX	3411	67	24086	592	-0.1117	0.8943	0.689446	1.16003	0.4	0	A03AX Other drugs for functional gastrointestinal disorders	0.632
p6m	F	A03AX	3465	13	24544	134	-0.2656	0.7668	0.429715	1.36819	0.37	0	A03AX Other drugs for functional gastrointestinal disorders	0.708
p6m	G	A03AX	1165	6	24361	317	-0.9068	0.4038	0.179158	0.910141	0.029	1	A03AX Other drugs for functional gastrointestinal disorders	0.153
p6m	G	A03AX	1166	5	24465	213	-0.7101	0.4916	0.201431	1.1998	0.12	0	A03AX Other drugs for functional gastrointestinal disorders	0.358
p6m	G	A03AX	1166	5	24544	134	-0.2371	0.7889	0.3206	1.94113	0.61	0	A03AX Other drugs for functional gastrointestinal disorders	0.756
p6m	G	A03AX	1143	28	24086	592	-0.0322	0.9684	0.656012	1.42942	0.87	0	A03AX Other drugs for functional gastrointestinal disorders	0.94
p6m	A	A03BB	1142	29	2289	18	0.8842	2.421	1.2915	4.53816	0.0058	-1	A03BB Belladonna alkaloids, semisynthetic, quaternary ammonium compounds	0.0369
p6m	A	A03BB	1132	39	2277	30	0.645	1.906	1.14401	3.17555	0.013	-1	A03BB Belladonna alkaloids, semisynthetic, quaternary ammonium compounds	0.0666
p6m	A	A03BB	1120	51	2256	51	0.4617	1.5868	1.03927	2.42257	0.033	-1	A03BB Belladonna alkaloids, semisynthetic, quaternary ammonium compounds	0.175
p6m	A	A03BB	1098	73	2205	102	0.1457	1.1568	0.83026	1.61205	0.39	0	A03BB Belladonna alkaloids, semisynthetic, quaternary ammonium compounds	0.623
p6m	B	A03BB	131	16	3300	31	2.1152	8.2915	3.98943	17.2329	1.5e-08	-1	A03BB Belladonna alkaloids, semisynthetic, quaternary ammonium compounds	3.85e-07
p6m	B	A03BB	131	16	3278	53	1.5032	4.4959	2.31209	8.74235	9.4e-06	-1	A03BB Belladonna alkaloids, semisynthetic, quaternary ammonium compounds	0.000276
p6m	B	A03BB	131	16	3245	86	1.0781	2.9391	1.5597	5.53845	0.00085	-1	A03BB Belladonna alkaloids, semisynthetic, quaternary ammonium compounds	0.0142
p6m	B	A03BB	129	18	3174	157	0.8249	2.2817	1.27475	4.08401	0.0055	-1	A03BB Belladonna alkaloids, semisynthetic, quaternary ammonium compounds	0.062
p6m	C	A03BB	1142	29	361304	1232	1.5116	4.5339	3.08092	6.67207	1.7e-14	-1	A03BB Belladonna alkaloids, semisynthetic, quaternary ammonium compounds	1.49e-13
p6m	C	A03BB	1132	39	359752	2784	1.1025	3.0117	2.16581	4.18807	5.6e-11	-1	A03BB Belladonna alkaloids, semisynthetic, quaternary ammonium compounds	5.18e-10
p6m	C	A03BB	1120	51	357692	4844	0.9016	2.4635	1.84601	3.28765	9.2e-10	-1	A03BB Belladonna alkaloids, semisynthetic, quaternary ammonium compounds	1.11e-08
p6m	C	A03BB	1098	73	351477	11059	0.4981	1.6456	1.29134	2.09694	5.6e-05	-1	A03BB Belladonna alkaloids, semisynthetic, quaternary ammonium compounds	0.000324
p6m	D	A03BB	131	16	361304	1232	3.1625	23.6288	13.5089	41.3298	1.5e-28	-1	A03BB Belladonna alkaloids, semisynthetic, quaternary ammonium compounds	2.92e-27
p6m	D	A03BB	131	16	359752	2784	2.2886	9.8608	5.71171	17.0239	2.1e-16	-1	A03BB Belladonna alkaloids, semisynthetic, quaternary ammonium compounds	4.67e-15
p6m	D	A03BB	131	16	357692	4844	1.8231	6.1913	3.60877	10.622	3.6e-11	-1	A03BB Belladonna alkaloids, semisynthetic, quaternary ammonium compounds	7.2e-10
p6m	D	A03BB	129	18	351477	11059	1.1883	3.2815	1.97496	5.45245	4.5e-06	-1	A03BB Belladonna alkaloids, semisynthetic, quaternary ammonium compounds	4.65e-05
p6m	E	A03BB	3431	47	361304	1232	1.1277	3.0884	2.28386	4.17646	2.4e-13	-1	A03BB Belladonna alkaloids, semisynthetic, quaternary ammonium compounds	2.15e-12
p6m	E	A03BB	3376	102	357692	4844	0.6609	1.9366	1.58103	2.37211	1.7e-10	-1	A03BB Belladonna alkaloids, semisynthetic, quaternary ammonium compounds	2.65e-09
p6m	E	A03BB	3409	69	359752	2784	0.7683	2.1561	1.68502	2.75886	1e-09	-1	A03BB Belladonna alkaloids, semisynthetic, quaternary ammonium compounds	1.25e-08
p6m	E	A03BB	3303	175	351477	11059	0.4154	1.515	1.29627	1.77061	1.8e-07	-1	A03BB Belladonna alkaloids, semisynthetic, quaternary ammonium compounds	2.32e-06
p6m	F	A03BB	3303	175	23276	1402	-0.0842	0.9192	0.779096	1.08451	0.32	0	A03BB Belladonna alkaloids, semisynthetic, quaternary ammonium compounds	0.549
p6m	F	A03BB	3431	47	24343	335	0.0633	1.0654	0.777363	1.46012	0.69	0	A03BB Belladonna alkaloids, semisynthetic, quaternary ammonium compounds	0.85
p6m	F	A03BB	3376	102	23936	742	0.0386	1.0394	0.837864	1.28938	0.72	0	A03BB Belladonna alkaloids, semisynthetic, quaternary ammonium compounds	0.854
p6m	F	A03BB	3409	69	24165	513	0.0231	1.0234	0.788849	1.32768	0.86	0	A03BB Belladonna alkaloids, semisynthetic, quaternary ammonium compounds	0.913
p6m	G	A03BB	1142	29	24343	335	0.5323	1.7028	1.14917	2.52326	0.008	-1	A03BB Belladonna alkaloids, semisynthetic, quaternary ammonium compounds	0.0604
p6m	G	A03BB	1132	39	24165	513	0.4102	1.5072	1.07457	2.11389	0.018	-1	A03BB Belladonna alkaloids, semisynthetic, quaternary ammonium compounds	0.101
p6m	G	A03BB	1120	51	23936	742	0.3193	1.3761	1.02313	1.85085	0.035	-1	A03BB Belladonna alkaloids, semisynthetic, quaternary ammonium compounds	0.176
p6m	G	A03BB	1098	73	23276	1402	0.0459	1.047	0.817207	1.3413	0.72	0	A03BB Belladonna alkaloids, semisynthetic, quaternary ammonium compounds	0.913
p6m	H	A03BB	131	16	24343	335	2.1221	8.3483	4.73197	14.7284	2.4e-13	-1	A03BB Belladonna alkaloids, semisynthetic, quaternary ammonium compounds	6.24e-12
p6m	H	A03BB	131	16	24165	513	1.6442	5.1766	2.96441	9.03978	7.4e-09	-1	A03BB Belladonna alkaloids, semisynthetic, quaternary ammonium compounds	2.2e-07
p6m	H	A03BB	131	16	23936	742	1.2998	3.6684	2.11693	6.357	3.6e-06	-1	A03BB Belladonna alkaloids, semisynthetic, quaternary ammonium compounds	7.2e-05
p6m	H	A03BB	129	18	23276	1402	0.8123	2.2532	1.34702	3.76885	0.002	-1	A03BB Belladonna alkaloids, semisynthetic, quaternary ammonium compounds	0.0191
p6m	A	A03FA	1146	25	2301	6	1.8243	6.1983	2.41571	15.9036	0.00015	-1	A03FA Propulsives [DG:DG01763]	0.00205
p6m	A	A03FA	1113	58	2261	46	0.7174	2.0492	1.34287	3.12695	0.00088	-1	A03FA Propulsives [DG:DG01763]	0.0209
p6m	A	A03FA	1142	29	2291	16	1.0257	2.7892	1.44729	5.37516	0.0022	-1	A03FA Propulsives [DG:DG01763]	0.0323
p6m	B	A03FA	140	7	3315	16	1.855	6.3914	2.25851	18.0874	0.00047	-1	A03FA Propulsives [DG:DG01763]	0.00362
p6m	B	A03FA	140	7	3307	24	1.5469	4.6971	1.74832	12.6195	0.0022	-1	A03FA Propulsives [DG:DG01763]	0.0215
p6m	B	A03FA	139	8	3294	37	1.3225	3.753	1.54523	9.11502	0.0035	-1	A03FA Propulsives [DG:DG01763]	0.0318
p6m	B	A03FA	136	11	3238	93	0.8235	2.2785	1.12016	4.63454	0.023	-1	A03FA Propulsives [DG:DG01763]	0.158
p6m	C	A03FA	1151	20	361786	750	1.5987	4.9467	3.11909	7.84529	1.1e-11	-1	A03FA Propulsives [DG:DG01763]	7.3e-11
p6m	C	A03FA	1146	25	360895	1641	1.1804	3.2555	2.16462	4.89628	1.4e-08	-1	A03FA Propulsives [DG:DG01763]	9.96e-08
p6m	C	A03FA	1113	58	354983	7553	0.612	1.844	1.40594	2.41868	9.8e-06	-1	A03FA Propulsives [DG:DG01763]	6.94e-05
p6m	C	A03FA	1142	29	359433	3103	0.753	2.1234	1.45702	3.0946	8.9e-05	-1	A03FA Propulsives [DG:DG01763]	0.000407
p6m	D	A03FA	140	7	361786	750	2.7798	16.1161	7.35409	35.3176	3.8e-12	-1	A03FA Propulsives [DG:DG01763]	2.47e-11
p6m	D	A03FA	140	7	360895	1641	2.1102	8.2503	3.78812	17.9686	1.1e-07	-1	A03FA Propulsives [DG:DG01763]	8.16e-07
p6m	D	A03FA	139	8	359433	3103	1.668	5.3015	2.56299	10.9662	6.9e-06	-1	A03FA Propulsives [DG:DG01763]	4.06e-05
p6m	D	A03FA	136	11	354983	7553	1.0634	2.8963	1.54127	5.4428	0.00095	-1	A03FA Propulsives [DG:DG01763]	0.00561
p6m	E	A03FA	3455	23	361786	750	0.8807	2.4126	1.57779	3.68911	4.8e-05	-1	A03FA Propulsives [DG:DG01763]	0.000166
p6m	E	A03FA	3447	31	360895	1641	0.4778	1.6125	1.12284	2.31557	0.0097	-1	A03FA Propulsives [DG:DG01763]	0.0303
p6m	E	A03FA	3374	104	354983	7553	0.245	1.2776	1.04625	1.56016	0.016	-1	A03FA Propulsives [DG:DG01763]	0.0509
p6m	E	A03FA	3433	45	359433	3103	0.2516	1.2861	0.952777	1.73599	0.1	0	A03FA Propulsives [DG:DG01763]	0.202
p6m	F	A03FA	3374	104	23466	1212	-0.4454	0.6405	0.520444	0.788372	2.6e-05	1	A03FA Propulsives [DG:DG01763]	0.00123
p6m	F	A03FA	3433	45	24051	627	-0.6339	0.5305	0.389202	0.723131	6e-05	1	A03FA Propulsives [DG:DG01763]	0.00187
p6m	F	A03FA	3447	31	24286	392	-0.5311	0.5879	0.40471	0.854128	0.0053	1	A03FA Propulsives [DG:DG01763]	0.0542
p6m	F	A03FA	3455	23	24429	249	-0.3636	0.6952	0.449138	1.07602	0.1	0	A03FA Propulsives [DG:DG01763]	0.372
p6m	G	A03FA	1151	20	24429	249	0.4125	1.5105	0.945852	2.4123	0.084	0	A03FA Propulsives [DG:DG01763]	0.254
p6m	G	A03FA	1146	25	24286	392	0.2212	1.2476	0.823782	1.88932	0.3	0	A03FA Propulsives [DG:DG01763]	0.561
p6m	G	A03FA	1142	29	24051	627	-0.0848	0.9187	0.626786	1.34652	0.66	0	A03FA Propulsives [DG:DG01763]	0.855
p6m	G	A03FA	1113	58	23466	1212	-0.0222	0.978	0.742879	1.28754	0.87	0	A03FA Propulsives [DG:DG01763]	0.94
p6m	H	A03FA	140	7	24429	249	1.4683	4.3419	1.9712	9.56354	0.00027	-1	A03FA Propulsives [DG:DG01763]	0.00105
p6m	H	A03FA	140	7	24286	392	1.1058	3.0216	1.38534	6.59035	0.0054	-1	A03FA Propulsives [DG:DG01763]	0.0229
p6m	H	A03FA	139	8	24051	627	0.8251	2.2822	1.10107	4.73031	0.026	-1	A03FA Propulsives [DG:DG01763]	0.0839
p6m	H	A03FA	136	11	23466	1212	0.5006	1.6497	0.880335	3.09137	0.12	0	A03FA Propulsives [DG:DG01763]	0.425
p6m	A	A04AA	1159	12	2301	6	1.379	3.9709	1.41716	11.1252	0.0087	-1	A04AA Serotonin (5HT3) antagonists	0.11
p6m	C	A04AA	1166	5	362390	146	2.0522	7.7849	3.12851	19.3716	1e-05	-1	A04AA Serotonin (5HT3) antagonists	3.25e-05
p6m	C	A04AA	1159	12	361480	1056	1.0187	2.7695	1.55434	4.93461	0.00055	-1	A04AA Serotonin (5HT3) antagonists	0.00239
p6m	C	A04AA	1166	5	362196	340	1.2114	3.3582	1.37326	8.2122	0.0079	-1	A04AA Serotonin (5HT3) antagonists	0.02
p6m	C	A04AA	1165	6	361944	592	0.9	2.4595	1.09175	5.54084	0.03	-1	A04AA Serotonin (5HT3) antagonists	0.0702
p6m	E	A04AA	3472	6	362390	146	1.3037	3.6828	1.61405	8.40292	0.0019	-1	A04AA Serotonin (5HT3) antagonists	0.0048
p6m	E	A04AA	3460	18	361480	1056	0.4914	1.6346	1.02154	2.6155	0.041	-1	A04AA Serotonin (5HT3) antagonists	0.111
p6m	E	A04AA	3471	7	362196	340	0.6341	1.8853	0.887152	4.00661	0.099	0	A04AA Serotonin (5HT3) antagonists	0.201
p6m	E	A04AA	3469	9	361944	592	0.3629	1.4375	0.7414	2.78725	0.28	0	A04AA Serotonin (5HT3) antagonists	0.43
p6m	F	A04AA	3469	9	24512	166	-0.8139	0.4431	0.225204	0.871904	0.018	1	A04AA Serotonin (5HT3) antagonists	0.115
p6m	F	A04AA	3460	18	24445	233	-0.4607	0.6309	0.388264	1.02504	0.063	0	A04AA Serotonin (5HT3) antagonists	0.244
p6m	F	A04AA	3471	7	24563	115	-0.6742	0.5096	0.23597	1.10048	0.086	0	A04AA Serotonin (5HT3) antagonists	0.288
p6m	F	A04AA	3472	6	24604	74	-0.4061	0.6663	0.287392	1.54456	0.34	0	A04AA Serotonin (5HT3) antagonists	0.67
p6m	G	A04AA	1166	5	24604	74	0.3545	1.4255	0.568477	3.57456	0.45	0	A04AA Serotonin (5HT3) antagonists	0.65
p6m	G	A04AA	1165	6	24512	166	-0.2773	0.7578	0.332975	1.72471	0.51	0	A04AA Serotonin (5HT3) antagonists	0.808
p6m	G	A04AA	1159	12	24445	233	0.0897	1.0938	0.607311	1.97013	0.77	0	A04AA Serotonin (5HT3) antagonists	0.92
p6m	G	A04AA	1166	5	24563	115	-0.0812	0.922	0.372858	2.27994	0.86	0	A04AA Serotonin (5HT3) antagonists	0.941
p6m	E	A05AA	3471	7	362175	361	0.7061	2.0261	0.956019	4.29388	0.065	0	A05AA Bile acid and derivatives [DG:DG01956]	0.109
p6m	E	A05AA	3471	7	362072	464	0.4367	1.5476	0.731557	3.274	0.25	0	A05AA Bile acid and derivatives [DG:DG01956]	0.408
p6m	E	A05AA	3471	7	362038	498	0.2936	1.3412	0.630499	2.85302	0.45	0	A05AA Bile acid and derivatives [DG:DG01956]	0.612
p6m	E	A05AA	3471	7	361961	575	0.1087	1.1148	0.525123	2.36659	0.78	0	A05AA Bile acid and derivatives [DG:DG01956]	0.859
p6m	F	A05AA	3471	7	24596	82	-0.3724	0.6891	0.315364	1.50575	0.35	0	A05AA Bile acid and derivatives [DG:DG01956]	0.583
p6m	F	A05AA	3471	7	24609	69	-0.2048	0.8148	0.370409	1.79243	0.61	0	A05AA Bile acid and derivatives [DG:DG01956]	0.795
p6m	F	A05AA	3471	7	24619	59	-0.0696	0.9328	0.420744	2.06807	0.86	0	A05AA Bile acid and derivatives [DG:DG01956]	0.913
p6m	F	A05AA	3471	7	24625	53	0.0525	1.0539	0.472821	2.34903	0.9	0	A05AA Bile acid and derivatives [DG:DG01956]	0.969
p6m	A	A06AA	1094	77	2272	35	0.9452	2.5733	1.67537	3.95263	1.6e-05	-1	A06AA Softeners, emollients	0.000491
p6m	A	A06AA	1116	55	2286	21	1.102	3.0102	1.76551	5.13463	5.2e-05	-1	A06AA Softeners, emollients	0.000712
p6m	A	A06AA	1068	103	2242	65	0.7103	2.0346	1.44591	2.86289	4.6e-05	-1	A06AA Softeners, emollients	0.00261
p6m	A	A06AA	1110	61	2278	29	0.8929	2.4422	1.52189	3.91868	0.00021	-1	A06AA Softeners, emollients	0.00265
p6m	B	A06AA	136	11	3266	65	0.5758	1.7785	0.879522	3.59629	0.11	0	A06AA Softeners, emollients	0.217
p6m	B	A06AA	136	11	3252	79	0.356	1.4277	0.713466	2.85681	0.31	0	A06AA Softeners, emollients	0.47
p6m	B	A06AA	134	13	3232	99	0.23	1.2586	0.660397	2.39848	0.48	0	A06AA Softeners, emollients	0.762
p6m	B	A06AA	130	17	3180	151	0.1666	1.1813	0.665401	2.0971	0.57	0	A06AA Softeners, emollients	0.818
p6m	C	A06AA	1116	55	360436	2100	1.4978	4.472	3.35434	5.9621	1.8e-24	-1	A06AA Softeners, emollients	2.49e-23
p6m	C	A06AA	1094	77	357394	5142	1.069	2.9126	2.28413	3.71393	6.7e-18	-1	A06AA Softeners, emollients	2.3e-16
p6m	C	A06AA	1110	61	358998	3538	1.1628	3.199	2.44086	4.19269	3.6e-17	-1	A06AA Softeners, emollients	6.05e-16
p6m	C	A06AA	1068	103	353585	8951	0.8826	2.4173	1.95557	2.98797	3.3e-16	-1	A06AA Softeners, emollients	1.34e-14
p6m	D	A06AA	136	11	360436	2100	1.6137	5.0213	2.63253	9.57761	9.7e-07	-1	A06AA Softeners, emollients	2.97e-06
p6m	D	A06AA	136	11	358998	3538	1.1673	3.2133	1.70068	6.07119	0.00032	-1	A06AA Softeners, emollients	0.00102
p6m	D	A06AA	134	13	357394	5142	0.9616	2.6159	1.44589	4.73286	0.0015	-1	A06AA Softeners, emollients	0.00469
p6m	D	A06AA	130	17	353585	8951	0.7838	2.1899	1.2955	3.70171	0.0034	-1	A06AA Softeners, emollients	0.0156
p6m	E	A06AA	3402	76	360436	2100	1.0918	2.9796	2.34502	3.78582	4.1e-19	-1	A06AA Softeners, emollients	5.77e-18
p6m	E	A06AA	3388	90	358998	3538	0.8053	2.2373	1.79846	2.78328	4.9e-13	-1	A06AA Softeners, emollients	9.19e-12
p6m	E	A06AA	3310	168	353585	8951	0.5573	1.746	1.48546	2.05216	1.4e-11	-1	A06AA Softeners, emollients	3.05e-10
p6m	E	A06AA	3366	112	357394	5142	0.6707	1.9557	1.60717	2.37981	2.1e-11	-1	A06AA Softeners, emollients	4.02e-10
p6m	F	A06AA	3402	76	24148	530	0.1721	1.1878	0.925101	1.52508	0.18	0	A06AA Softeners, emollients	0.529
p6m	F	A06AA	3388	90	23984	694	0.0657	1.0679	0.84943	1.34251	0.57	0	A06AA Softeners, emollients	0.759
p6m	F	A06AA	3310	168	23273	1405	-0.0307	0.9698	0.818206	1.14949	0.72	0	A06AA Softeners, emollients	0.86
p6m	F	A06AA	3366	112	23745	933	-0.0152	0.9849	0.801734	1.20991	0.89	0	A06AA Softeners, emollients	0.943
p6m	G	A06AA	1116	55	24148	530	0.6699	1.954	1.45834	2.61806	7.2e-06	-1	A06AA Softeners, emollients	0.000133
p6m	G	A06AA	1110	61	23984	694	0.4966	1.6431	1.24644	2.16599	0.00043	-1	A06AA Softeners, emollients	0.0053
p6m	G	A06AA	1094	77	23745	933	0.4318	1.5401	1.20142	1.97424	0.00065	-1	A06AA Softeners, emollients	0.0103
p6m	G	A06AA	1068	103	23273	1405	0.331	1.3923	1.12106	1.72918	0.0028	-1	A06AA Softeners, emollients	0.0425
p6m	H	A06AA	136	11	24148	530	0.879	2.4085	1.26463	4.587	0.0075	-1	A06AA Softeners, emollients	0.0225
p6m	H	A06AA	136	11	23984	694	0.5526	1.7377	0.916476	3.29498	0.09	0	A06AA Softeners, emollients	0.191
p6m	H	A06AA	134	13	23745	933	0.3496	1.4184	0.780822	2.57673	0.25	0	A06AA Softeners, emollients	0.481
p6m	H	A06AA	130	17	23273	1405	0.2229	1.2497	0.734569	2.12611	0.41	0	A06AA Softeners, emollients	0.706
p6m	A	A06AB	1082	89	2275	32	1.142	3.133	2.03303	4.82732	2.3e-07	-1	A06AB Contact laxatives	5.37e-06
p6m	A	A06AB	1039	132	2235	72	0.7287	2.0724	1.50437	2.85489	8.3e-06	-1	A06AB Contact laxatives	0.000406
p6m	A	A06AB	1063	108	2250	57	0.738	2.0917	1.47037	2.97555	4.1e-05	-1	A06AB Contact laxatives	0.000943
p6m	A	A06AB	997	174	2184	123	0.5427	1.7206	1.3199	2.24297	6e-05	-1	A06AB Contact laxatives	0.00272
p6m	B	A06AB	117	30	3240	91	1.3951	4.0354	2.44217	6.66789	5.2e-08	-1	A06AB Contact laxatives	1e-06
p6m	B	A06AB	109	38	3165	166	0.9745	2.6497	1.69575	4.14035	1.9e-05	-1	A06AB Contact laxatives	0.000633
p6m	B	A06AB	115	32	3198	133	0.96	2.6116	1.62783	4.19002	6.9e-05	-1	A06AB Contact laxatives	0.00127
p6m	B	A06AB	102	45	3079	252	0.8427	2.3226	1.53463	3.51513	6.7e-05	-1	A06AB Contact laxatives	0.00277
p6m	C	A06AB	1082	89	359855	2681	1.6117	5.0113	3.94891	6.35961	4.1e-40	-1	A06AB Contact laxatives	1.7e-38
p6m	C	A06AB	1039	132	355360	7176	1.2265	3.4092	2.8007	4.14996	2.3e-34	-1	A06AB Contact laxatives	4.74e-32
p6m	C	A06AB	1063	108	357756	4780	1.3336	3.7947	3.05767	4.70936	1e-33	-1	A06AB Contact laxatives	9.25e-32
p6m	C	A06AB	997	174	349261	13275	0.9794	2.6627	2.23708	3.16939	3.1e-28	-1	A06AB Contact laxatives	7.53e-26
p6m	D	A06AB	117	30	359855	2681	2.341	10.3915	6.60474	16.3493	4.3e-24	-1	A06AB Contact laxatives	6.71e-23
p6m	D	A06AB	109	38	355360	7176	1.8484	6.3497	4.23545	9.51946	3.7e-19	-1	A06AB Contact laxatives	1.23e-17
p6m	D	A06AB	115	32	357756	4780	1.9276	6.8731	4.45265	10.6094	3.2e-18	-1	A06AB Contact laxatives	9.49e-17
p6m	D	A06AB	102	45	349261	13275	1.5354	4.643	3.17229	6.79561	2.8e-15	-1	A06AB Contact laxatives	1.16e-13
p6m	E	A06AB	3357	121	359855	2681	1.2245	3.4023	2.79464	4.14207	3.2e-34	-1	A06AB Contact laxatives	1.26e-32
p6m	E	A06AB	3313	165	357756	4780	1.0472	2.8497	2.40728	3.37338	4.7e-34	-1	A06AB Contact laxatives	5.29e-32
p6m	E	A06AB	3274	204	355360	7176	0.9118	2.4887	2.13839	2.8964	5e-32	-1	A06AB Contact laxatives	6.23e-30
p6m	E	A06AB	3181	297	349261	13275	0.7278	2.0705	1.82287	2.35181	4.2e-29	-1	A06AB Contact laxatives	5.94e-27
p6m	F	A06AB	3313	165	23680	998	0.3098	1.3631	1.14226	1.62675	0.00059	-1	A06AB Contact laxatives	0.0121
p6m	F	A06AB	3181	297	22666	2012	0.1998	1.2212	1.06729	1.39721	0.0036	-1	A06AB Contact laxatives	0.0351
p6m	F	A06AB	3274	204	23358	1320	0.2454	1.2781	1.08943	1.49944	0.0026	-1	A06AB Contact laxatives	0.0405
p6m	F	A06AB	3357	121	23942	736	0.2738	1.3149	1.07209	1.61279	0.0086	-1	A06AB Contact laxatives	0.077
p6m	G	A06AB	1082	89	23942	736	0.7213	2.057	1.61911	2.61335	3.5e-09	-1	A06AB Contact laxatives	1.94e-07
p6m	G	A06AB	1039	132	23358	1320	0.5912	1.8061	1.47898	2.20556	6.7e-09	-1	A06AB Contact laxatives	3.45e-07
p6m	G	A06AB	1063	108	23680	998	0.6417	1.8997	1.52686	2.36362	8.6e-09	-1	A06AB Contact laxatives	5.3e-07
p6m	G	A06AB	997	174	22666	2012	0.4763	1.6101	1.34841	1.92264	1.4e-07	-1	A06AB Contact laxatives	1.13e-05
p6m	H	A06AB	117	30	23942	736	1.4324	4.1889	2.68564	6.53372	2.7e-10	-1	A06AB Contact laxatives	5.27e-09
p6m	H	A06AB	109	38	23358	1320	1.187	3.2772	2.1877	4.90919	8.6e-09	-1	A06AB Contact laxatives	2.15e-07
p6m	H	A06AB	115	32	23680	998	1.2264	3.4089	2.21869	5.23744	2.2e-08	-1	A06AB Contact laxatives	4.89e-07
p6m	H	A06AB	102	45	22666	2012	1.0192	2.7709	1.88989	4.0626	1.8e-07	-1	A06AB Contact laxatives	5.58e-06
p6m	A	A06AC	1165	6	2302	5	0.7542	2.1259	0.633204	7.13718	0.22	0	A06AC Bulk-forming laxatives	0.4
p6m	A	A06AC	1146	25	2282	25	0.3641	1.4393	0.789657	2.6233	0.23	0	A06AC Bulk-forming laxatives	0.497
p6m	A	A06AC	1163	8	2299	8	0.4546	1.5755	0.57752	4.29839	0.38	0	A06AC Bulk-forming laxatives	0.561
p6m	A	A06AC	1160	11	2293	14	0.0571	1.0587	0.46247	2.42372	0.89	0	A06AC Bulk-forming laxatives	0.934
p6m	C	A06AC	1160	11	359340	3196	-0.2095	0.811	0.443449	1.48306	0.5	0	A06AC Bulk-forming laxatives	0.609
p6m	C	A06AC	1165	6	361235	1301	0.1463	1.1575	0.515653	2.59848	0.72	0	A06AC Bulk-forming laxatives	0.781
p6m	C	A06AC	1163	8	360223	2313	-0.1374	0.8717	0.432914	1.75503	0.7	0	A06AC Bulk-forming laxatives	0.794
p6m	C	A06AC	1146	25	356792	5744	0.0324	1.0329	0.690519	1.54512	0.88	0	A06AC Bulk-forming laxatives	0.922
p6m	E	A06AC	3462	16	360223	2313	-0.271	0.7626	0.465028	1.25074	0.28	0	A06AC Bulk-forming laxatives	0.441
p6m	E	A06AC	3453	25	359340	3196	-0.1922	0.8251	0.553976	1.22898	0.34	0	A06AC Bulk-forming laxatives	0.513
p6m	E	A06AC	3428	50	356792	5744	-0.1096	0.8962	0.675287	1.18938	0.45	0	A06AC Bulk-forming laxatives	0.582
p6m	E	A06AC	3467	11	361235	1301	-0.0564	0.9452	0.520476	1.71643	0.85	0	A06AC Bulk-forming laxatives	0.872
p6m	F	A06AC	3428	50	24056	622	-0.3916	0.676	0.503367	0.90773	0.0092	1	A06AC Bulk-forming laxatives	0.0704
p6m	F	A06AC	3453	25	24320	358	-0.4973	0.6081	0.402691	0.918434	0.018	1	A06AC Bulk-forming laxatives	0.115
p6m	F	A06AC	3462	16	24425	253	-0.57	0.5655	0.339145	0.942949	0.029	1	A06AC Bulk-forming laxatives	0.155
p6m	F	A06AC	3467	11	24513	165	-0.4845	0.616	0.332554	1.14112	0.12	0	A06AC Bulk-forming laxatives	0.422
p6m	G	A06AC	1160	11	24320	358	-0.4752	0.6217	0.337401	1.14568	0.13	0	A06AC Bulk-forming laxatives	0.383
p6m	G	A06AC	1163	8	24425	253	-0.3737	0.6882	0.33772	1.40243	0.3	0	A06AC Bulk-forming laxatives	0.561
p6m	G	A06AC	1146	25	24056	622	-0.2307	0.794	0.526556	1.19714	0.27	0	A06AC Bulk-forming laxatives	0.596
p6m	G	A06AC	1165	6	24513	165	-0.2287	0.7956	0.348974	1.81377	0.59	0	A06AC Bulk-forming laxatives	0.742
p6m	A	A06AD	982	189	2186	121	0.7492	2.1153	1.63103	2.74347	1.6e-08	-1	A06AD Osmotically acting laxatives	1.31e-06
p6m	A	A06AD	1037	134	2225	82	0.7952	2.2149	1.63171	3.00664	3.4e-07	-1	A06AD Osmotically acting laxatives	6.8e-06
p6m	A	A06AD	939	232	2138	169	0.6247	1.8677	1.48095	2.35549	1.3e-07	-1	A06AD Osmotically acting laxatives	1.24e-05
p6m	A	A06AD	868	303	2021	286	0.4171	1.5175	1.24218	1.85392	4.4e-05	-1	A06AD Osmotically acting laxatives	0.00261
p6m	B	A06AD	112	35	3150	181	0.8963	2.4505	1.56974	3.82559	8e-05	-1	A06AD Osmotically acting laxatives	0.00077
p6m	B	A06AD	103	44	3065	266	0.7723	2.1647	1.43679	3.26145	0.00022	-1	A06AD Osmotically acting laxatives	0.00323
p6m	B	A06AD	83	64	2806	525	0.6626	1.9399	1.33388	2.82123	0.00052	-1	A06AD Osmotically acting laxatives	0.0161
p6m	B	A06AD	98	49	2979	352	0.6154	1.8504	1.24844	2.74263	0.0022	-1	A06AD Osmotically acting laxatives	0.0244
p6m	C	A06AD	1037	134	354297	8239	1.3018	3.676	3.03856	4.44719	6.2e-41	-1	A06AD Osmotically acting laxatives	3.43e-39
p6m	C	A06AD	982	189	346220	16316	1.033	2.8094	2.38204	3.31351	1.3e-34	-1	A06AD Osmotically acting laxatives	2.41e-32
p6m	C	A06AD	939	232	337922	24614	0.8558	2.3532	2.01937	2.74215	5.7e-28	-1	A06AD Osmotically acting laxatives	5.87e-26
p6m	C	A06AD	868	303	319553	42983	0.5992	1.8207	1.58316	2.09398	4.5e-17	-1	A06AD Osmotically acting laxatives	3.64e-15
p6m	D	A06AD	112	35	354297	8239	1.7367	5.6787	3.80349	8.47847	2e-17	-1	A06AD Osmotically acting laxatives	1.95e-16
p6m	D	A06AD	103	44	346220	16316	1.3953	4.0362	2.78196	5.85594	2e-13	-1	A06AD Osmotically acting laxatives	3.56e-12
p6m	D	A06AD	98	49	337922	24614	1.1389	3.1234	2.17481	4.48571	7e-10	-1	A06AD Osmotically acting laxatives	1.17e-08
p6m	D	A06AD	83	64	319553	42983	1.0093	2.7436	1.94252	3.87509	1e-08	-1	A06AD Osmotically acting laxatives	2.07e-07
p6m	E	A06AD	3262	216	354297	8239	0.9768	2.6558	2.29662	3.07123	1.2e-39	-1	A06AD Osmotically acting laxatives	5.91e-38
p6m	E	A06AD	3168	310	346220	16316	0.6721	1.9583	1.73147	2.21487	1e-26	-1	A06AD Osmotically acting laxatives	7.5e-25
p6m	E	A06AD	3077	401	337922	24614	0.5216	1.6848	1.50899	1.881	1.7e-20	-1	A06AD Osmotically acting laxatives	8.47e-19
p6m	E	A06AD	2889	589	319553	42983	0.3537	1.4244	1.29629	1.56516	1.9e-13	-1	A06AD Osmotically acting laxatives	7.68e-12
p6m	F	A06AD	2889	589	19193	5485	-0.1729	0.8412	0.762069	0.928602	0.00061	1	A06AD Osmotically acting laxatives	0.0123
p6m	F	A06AD	3077	401	20988	3690	-0.1106	0.8953	0.797952	1.00459	0.06	0	A06AD Osmotically acting laxatives	0.223
p6m	F	A06AD	3168	310	21968	2710	-0.0476	0.9535	0.838301	1.08463	0.47	0	A06AD Osmotically acting laxatives	0.696
p6m	F	A06AD	3262	216	22789	1889	-0.0252	0.9751	0.838397	1.13408	0.74	0	A06AD Osmotically acting laxatives	0.884
p6m	G	A06AD	982	189	21968	2710	0.3623	1.4367	1.21557	1.69796	2.1e-05	-1	A06AD Osmotically acting laxatives	0.000486
p6m	G	A06AD	1037	134	22789	1889	0.3642	1.4393	1.18751	1.74447	0.00021	-1	A06AD Osmotically acting laxatives	0.00268
p6m	G	A06AD	939	232	20988	3690	0.2616	1.299	1.11329	1.51578	0.00089	-1	A06AD Osmotically acting laxatives	0.0115
p6m	G	A06AD	868	303	19193	5485	0.0996	1.1047	0.959313	1.27221	0.17	0	A06AD Osmotically acting laxatives	0.51
p6m	H	A06AD	112	35	22789	1889	0.8429	2.3231	1.5584	3.46294	3.5e-05	-1	A06AD Osmotically acting laxatives	0.00021
p6m	H	A06AD	103	44	21968	2710	0.7605	2.1394	1.47457	3.10409	6.2e-05	-1	A06AD Osmotically acting laxatives	0.00069
p6m	H	A06AD	98	49	20988	3690	0.5793	1.7848	1.24541	2.55784	0.0016	-1	A06AD Osmotically acting laxatives	0.0106
p6m	H	A06AD	83	64	19193	5485	0.5431	1.7213	1.22116	2.42629	0.0019	-1	A06AD Osmotically acting laxatives	0.0191
p6m	A	A06AG	1163	8	2300	7	0.4705	1.6008	0.542921	4.71977	0.39	0	A06AG Enemas	0.591
p6m	A	A06AG	1164	7	2300	7	0.3217	1.3795	0.450537	4.22341	0.57	0	A06AG Enemas	0.737
p6m	A	A06AG	1158	13	2292	15	0.2373	1.2679	0.564238	2.84888	0.57	0	A06AG Enemas	0.752
p6m	C	A06AG	1164	7	362239	297	1.4702	4.3503	2.00716	9.42868	0.00019	-1	A06AG Enemas	0.000717
p6m	C	A06AG	1163	8	361957	579	0.8951	2.4475	1.1968	5.00541	0.014	-1	A06AG Enemas	0.0385
p6m	C	A06AG	1158	13	361291	1245	0.6132	1.8464	1.05031	3.24584	0.033	-1	A06AG Enemas	0.0827
p6m	E	A06AG	3469	9	362424	112	1.8672	6.4699	3.18868	13.1275	2.3e-07	-1	A06AG Enemas	1.01e-06
p6m	E	A06AG	3464	14	362239	297	1.3558	3.88	2.22298	6.7722	1.8e-06	-1	A06AG Enemas	1.19e-05
p6m	E	A06AG	3450	28	361291	1245	0.6164	1.8522	1.25882	2.72527	0.0018	-1	A06AG Enemas	0.00809
p6m	E	A06AG	3463	15	361957	579	0.7423	2.1007	1.23902	3.56154	0.0059	-1	A06AG Enemas	0.0237
p6m	F	A06AG	3464	14	24600	78	0.4646	1.5914	0.887832	2.85261	0.12	0	A06AG Enemas	0.333
p6m	F	A06AG	3469	9	24636	42	0.5321	1.7025	0.81452	3.55868	0.16	0	A06AG Enemas	0.515
p6m	F	A06AG	3450	28	24444	234	-0.033	0.9676	0.645881	1.44952	0.87	0	A06AG Enemas	0.943
p6m	F	A06AG	3463	15	24545	133	0.0076	1.0076	0.582519	1.74299	0.98	0	A06AG Enemas	0.984
p6m	G	A06AG	1164	7	24600	78	0.6808	1.9755	0.897264	4.34924	0.091	0	A06AG Enemas	0.285
p6m	G	A06AG	1163	8	24545	133	0.23	1.2586	0.606398	2.61214	0.54	0	A06AG Enemas	0.836
p6m	G	A06AG	1158	13	24444	234	0.0198	1.02	0.574082	1.81238	0.95	0	A06AG Enemas	0.966
p6m	A	A06AX	1149	22	2285	22	0.3117	1.3658	0.721617	2.5849	0.34	0	A06AX Other drugs for constipation	0.598
p6m	A	A06AX	1165	6	2301	6	0.3231	1.3814	0.411561	4.63709	0.6	0	A06AX Other drugs for constipation	0.754
p6m	B	A06AX	142	5	3292	39	0.7847	2.1918	0.785875	6.11301	0.13	0	A06AX Other drugs for constipation	0.488
p6m	C	A06AX	1149	22	359656	2880	0.4728	1.6045	1.04391	2.466	0.031	-1	A06AX Other drugs for constipation	0.0785
p6m	C	A06AX	1166	5	362122	414	0.8734	2.395	0.971735	5.90264	0.058	0	A06AX Other drugs for constipation	0.0926
p6m	C	A06AX	1165	6	361115	1421	-0.1569	0.8548	0.380314	1.92125	0.7	0	A06AX Other drugs for constipation	0.767
p6m	C	A06AX	1166	5	361687	849	0.1568	1.1698	0.480341	2.84885	0.73	0	A06AX Other drugs for constipation	0.809
p6m	D	A06AX	142	5	359656	2880	0.8233	2.2781	0.921365	5.6327	0.075	0	A06AX Other drugs for constipation	0.186
p6m	E	A06AX	3434	44	359656	2880	0.3813	1.4642	1.08121	1.98287	0.014	-1	A06AX Other drugs for constipation	0.0455
p6m	E	A06AX	3471	7	362122	414	0.4096	1.5063	0.707239	3.2081	0.29	0	A06AX Other drugs for constipation	0.369
p6m	E	A06AX	3466	12	361115	1421	-0.2266	0.7973	0.449804	1.41313	0.44	0	A06AX Other drugs for constipation	0.609
p6m	E	A06AX	3470	8	361687	849	-0.1466	0.8637	0.428113	1.74237	0.68	0	A06AX Other drugs for constipation	0.81
p6m	F	A06AX	3466	12	24406	272	-0.9976	0.3688	0.205794	0.660792	0.0008	1	A06AX Other drugs for constipation	0.0181
p6m	F	A06AX	3470	8	24503	175	-0.9603	0.3828	0.187336	0.782085	0.0084	1	A06AX Other drugs for constipation	0.07
p6m	F	A06AX	3471	7	24558	120	-0.7205	0.4865	0.225411	1.05007	0.066	0	A06AX Other drugs for constipation	0.317
p6m	F	A06AX	3434	44	24236	442	-0.1945	0.8233	0.599679	1.13021	0.23	0	A06AX Other drugs for constipation	0.465
p6m	G	A06AX	1165	6	24406	272	-0.8482	0.4282	0.189243	0.968753	0.042	1	A06AX Other drugs for constipation	0.201
p6m	G	A06AX	1166	5	24503	175	-0.5321	0.5874	0.239742	1.43905	0.24	0	A06AX Other drugs for constipation	0.516
p6m	G	A06AX	1166	5	24558	120	-0.1284	0.8795	0.355897	2.17341	0.78	0	A06AX Other drugs for constipation	0.881
p6m	G	A06AX	1149	22	24236	442	-0.0359	0.9648	0.622479	1.49524	0.87	0	A06AX Other drugs for constipation	0.94
p6m	H	A06AX	142	5	24236	442	0.3322	1.394	0.558259	3.48089	0.48	0	A06AX Other drugs for constipation	0.732
p6m	A	A07AA	1096	75	2251	56	0.6636	1.9418	1.32555	2.84464	0.00066	-1	A07AA Antibiotics	0.0209
p6m	A	A07AA	1124	47	2278	29	0.8132	2.2551	1.36486	3.72588	0.0015	-1	A07AA Antibiotics	0.0255
p6m	A	A07AA	1144	27	2292	15	0.9205	2.5104	1.27933	4.92621	0.0075	-1	A07AA Antibiotics	0.0492
p6m	A	A07AA	1154	17	2300	7	1.1344	3.1093	1.23079	7.85507	0.016	-1	A07AA Antibiotics	0.0772
p6m	B	A07AA	142	5	3294	37	0.3523	1.4224	0.495775	4.08074	0.51	0	A07AA Antibiotics	0.66
p6m	B	A07AA	139	8	3208	123	-0.2026	0.8166	0.367765	1.81311	0.62	0	A07AA Antibiotics	0.818
p6m	B	A07AA	141	6	3261	70	0.0067	1.0067	0.39946	2.53714	0.99	0	A07AA Antibiotics	0.99
p6m	C	A07AA	1154	17	361897	639	1.6936	5.4391	3.29881	8.96789	3.2e-11	-1	A07AA Antibiotics	2.04e-10
p6m	C	A07AA	1124	47	358316	4220	0.9232	2.5173	1.862	3.40326	2e-09	-1	A07AA Antibiotics	2.17e-08
p6m	C	A07AA	1144	27	360556	1980	1.0874	2.9665	2.00095	4.39809	6.2e-08	-1	A07AA Antibiotics	4.1e-07
p6m	C	A07AA	1096	75	352784	9752	0.5861	1.7969	1.40922	2.29126	2.3e-06	-1	A07AA Antibiotics	2.07e-05
p6m	D	A07AA	142	5	360556	1980	1.4171	4.125	1.65481	10.2826	0.0024	-1	A07AA Antibiotics	0.00647
p6m	D	A07AA	141	6	358316	4220	0.8656	2.3763	1.03336	5.46464	0.042	-1	A07AA Antibiotics	0.0857
p6m	D	A07AA	139	8	352784	9752	0.3456	1.4129	0.681671	2.92839	0.35	0	A07AA Antibiotics	0.529
p6m	E	A07AA	3454	24	361897	639	1.1907	3.2892	2.16964	4.98658	2e-08	-1	A07AA Antibiotics	1.06e-07
p6m	E	A07AA	3402	76	358316	4220	0.5026	1.653	1.30861	2.08794	2.5e-05	-1	A07AA Antibiotics	0.000156
p6m	E	A07AA	3436	42	360556	1980	0.6507	1.9169	1.40243	2.62005	4.5e-05	-1	A07AA Antibiotics	0.000259
p6m	E	A07AA	3347	131	352784	9752	0.2257	1.2532	1.0469	1.50015	0.014	-1	A07AA Antibiotics	0.0455
p6m	F	A07AA	3347	131	23445	1233	-0.1886	0.8282	0.685454	1.00057	0.051	0	A07AA Antibiotics	0.212
p6m	F	A07AA	3436	42	24315	363	-0.0641	0.9379	0.67518	1.30298	0.7	0	A07AA Antibiotics	0.842
p6m	F	A07AA	3402	76	24045	633	-0.0504	0.9508	0.742967	1.21678	0.69	0	A07AA Antibiotics	0.85
p6m	F	A07AA	3454	24	24484	194	-0.0021	0.9979	0.646163	1.54099	0.99	0	A07AA Antibiotics	0.995
p6m	G	A07AA	1124	47	24045	633	0.4384	1.5503	1.13782	2.1123	0.0055	-1	A07AA Antibiotics	0.0472
p6m	G	A07AA	1154	17	24484	194	0.6134	1.8468	1.11029	3.07182	0.018	-1	A07AA Antibiotics	0.111
p6m	G	A07AA	1144	27	24315	363	0.4293	1.5362	1.02649	2.29889	0.037	-1	A07AA Antibiotics	0.185
p6m	G	A07AA	1096	75	23445	1233	0.2224	1.249	0.974235	1.60133	0.079	0	A07AA Antibiotics	0.4
p6m	H	A07AA	142	5	24315	363	0.8186	2.2673	0.899155	5.71727	0.083	0	A07AA Antibiotics	0.191
p6m	H	A07AA	141	6	24045	633	0.4482	1.5656	0.67496	3.63131	0.3	0	A07AA Antibiotics	0.545
p6m	H	A07AA	139	8	23445	1233	0.0713	1.0739	0.51609	2.23458	0.85	0	A07AA Antibiotics	0.935
p6m	A	A07DA	1132	39	2282	25	0.776	2.1728	1.2653	3.73079	0.0049	-1	A07DA Antipropulsives	0.0383
p6m	A	A07DA	1140	31	2289	18	0.8446	2.327	1.24627	4.34539	0.008	-1	A07DA Antipropulsives	0.0467
p6m	A	A07DA	1114	57	2268	39	0.6364	1.8897	1.21586	2.93688	0.0047	-1	A07DA Antipropulsives	0.0528
p6m	A	A07DA	1075	96	2231	76	0.4788	1.6141	1.15729	2.25135	0.0048	-1	A07DA Antipropulsives	0.0778
p6m	B	A07DA	141	6	3288	43	0.7733	2.1669	0.801091	5.86109	0.13	0	A07DA Antipropulsives	0.25
p6m	B	A07DA	140	7	3274	57	0.6689	1.9522	0.790143	4.82316	0.15	0	A07DA Antipropulsives	0.33
p6m	B	A07DA	139	8	3243	88	0.3096	1.3629	0.604885	3.07095	0.46	0	A07DA Antipropulsives	0.742
p6m	B	A07DA	134	13	3172	159	0.0755	1.0785	0.565824	2.05554	0.82	0	A07DA Antipropulsives	0.916
p6m	C	A07DA	1075	96	352701	9835	0.7387	2.0933	1.68362	2.60267	3e-11	-1	A07DA Antipropulsives	6.63e-10
p6m	C	A07DA	1140	31	360719	1817	1.1708	3.2247	2.22058	4.68275	7.7e-10	-1	A07DA Antipropulsives	4.26e-09
p6m	C	A07DA	1114	57	357090	5446	0.7662	2.1516	1.63192	2.83673	5.6e-08	-1	A07DA Antipropulsives	4.27e-07
p6m	C	A07DA	1132	39	358871	3665	0.7687	2.157	1.55061	3.00044	5e-06	-1	A07DA Antipropulsives	2.5e-05
p6m	D	A07DA	141	6	360719	1817	1.3882	4.0075	1.70803	9.4026	0.0014	-1	A07DA Antipropulsives	0.00312
p6m	D	A07DA	140	7	358871	3665	0.9316	2.5385	1.16042	5.55306	0.02	-1	A07DA Antipropulsives	0.0405
p6m	D	A07DA	139	8	357090	5446	0.6562	1.9275	0.925872	4.01259	0.079	0	A07DA Antipropulsives	0.141
p6m	D	A07DA	134	13	352701	9835	0.5881	1.8005	1.00201	3.23542	0.049	-1	A07DA Antipropulsives	0.145
p6m	E	A07DA	3306	172	352701	9835	0.5073	1.6607	1.41622	1.94743	4.3e-10	-1	A07DA Antipropulsives	7.61e-09
p6m	E	A07DA	3429	49	360719	1817	0.872	2.3917	1.78463	3.20531	5.3e-09	-1	A07DA Antipropulsives	3.07e-08
p6m	E	A07DA	3382	96	357090	5446	0.4917	1.6351	1.32577	2.01666	4.3e-06	-1	A07DA Antipropulsives	3.15e-05
p6m	E	A07DA	3414	64	358871	3665	0.4734	1.6055	1.24467	2.07097	0.00027	-1	A07DA Antipropulsives	0.00132
p6m	F	A07DA	3306	172	23342	1336	0.0831	1.0867	0.918434	1.28578	0.33	0	A07DA Antipropulsives	0.559
p6m	F	A07DA	3414	64	24076	602	-0.1153	0.8911	0.683039	1.16259	0.4	0	A07DA Antipropulsives	0.638
p6m	F	A07DA	3382	96	23846	832	-0.0296	0.9708	0.779298	1.20944	0.79	0	A07DA Antipropulsives	0.882
p6m	F	A07DA	3429	49	24263	415	-0.0141	0.986	0.726761	1.33772	0.93	0	A07DA Antipropulsives	0.99
p6m	G	A07DA	1075	96	23342	1336	0.3493	1.4181	1.13459	1.77236	0.0021	-1	A07DA Antipropulsives	0.034
p6m	G	A07DA	1114	57	23846	832	0.2883	1.3342	1.00618	1.7691	0.045	-1	A07DA Antipropulsives	0.211
p6m	G	A07DA	1140	31	24263	415	0.3515	1.4213	0.972506	2.0771	0.069	0	A07DA Antipropulsives	0.232
p6m	G	A07DA	1132	39	24076	602	0.2306	1.2593	0.899062	1.76398	0.18	0	A07DA Antipropulsives	0.427
p6m	H	A07DA	141	6	24263	415	0.7061	2.0262	0.86564	4.74252	0.1	0	A07DA Antipropulsives	0.211
p6m	H	A07DA	140	7	24076	602	0.5114	1.6676	0.761243	3.6533	0.2	0	A07DA Antipropulsives	0.371
p6m	H	A07DA	139	8	23846	832	0.2439	1.2762	0.611755	2.6624	0.52	0	A07DA Antipropulsives	0.722
p6m	H	A07DA	134	13	23342	1336	0.2218	1.2483	0.692569	2.25012	0.46	0	A07DA Antipropulsives	0.732
p6m	C	A07EA	1165	6	361470	1066	0.4569	1.5792	0.70472	3.53885	0.27	0	A07EA Corticosteroids acting locally	0.412
p6m	E	A07EA	3472	6	361988	548	0.1502	1.162	0.518701	2.60325	0.71	0	A07EA Corticosteroids acting locally	0.85
p6m	E	A07EA	3468	10	361470	1066	-0.0136	0.9865	0.528172	1.84241	0.97	0	A07EA Corticosteroids acting locally	0.973
p6m	F	A07EA	3468	10	24532	146	-0.6383	0.5282	0.276158	1.01019	0.054	0	A07EA Corticosteroids acting locally	0.221
p6m	F	A07EA	3472	6	24590	88	-0.6446	0.5249	0.227443	1.21118	0.13	0	A07EA Corticosteroids acting locally	0.364
p6m	G	A07EA	1165	6	24532	146	-0.082	0.9213	0.405061	2.09553	0.84	0	A07EA Corticosteroids acting locally	0.94
p6m	A	A07EC	1146	25	2284	23	0.4943	1.6394	0.885424	3.03526	0.12	0	A07EC Aminosalicylic acid and similar agents	0.384
p6m	A	A07EC	1155	16	2292	15	0.4381	1.5497	0.728176	3.29818	0.26	0	A07EC Aminosalicylic acid and similar agents	0.433
p6m	A	A07EC	1153	18	2288	19	0.3702	1.448	0.719757	2.9131	0.3	0	A07EC Aminosalicylic acid and similar agents	0.507
p6m	A	A07EC	1153	18	2288	19	0.3702	1.448	0.719757	2.9131	0.3	0	A07EC Aminosalicylic acid and similar agents	0.526
p6m	C	A07EC	1155	16	360116	2420	0.3947	1.4839	0.900833	2.44435	0.12	0	A07EC Aminosalicylic acid and similar agents	0.169
p6m	C	A07EC	1146	25	357911	4625	0.2578	1.2941	0.866984	1.93173	0.21	0	A07EC Aminosalicylic acid and similar agents	0.342
p6m	C	A07EC	1153	18	359150	3386	0.2229	1.2497	0.780913	1.9999	0.35	0	A07EC Aminosalicylic acid and similar agents	0.487
p6m	C	A07EC	1153	18	358762	3774	0.1189	1.1262	0.703931	1.80181	0.62	0	A07EC Aminosalicylic acid and similar agents	0.702
p6m	E	A07EC	3447	31	360116	2420	0.1688	1.1839	0.827466	1.69396	0.36	0	A07EC Aminosalicylic acid and similar agents	0.443
p6m	E	A07EC	3441	37	358762	3774	-0.0825	0.9208	0.663789	1.27735	0.62	0	A07EC Aminosalicylic acid and similar agents	0.776
p6m	E	A07EC	3430	48	357911	4625	-0.0241	0.9761	0.731849	1.302	0.87	0	A07EC Aminosalicylic acid and similar agents	0.929
p6m	E	A07EC	3441	37	359150	3386	0.0249	1.0252	0.738809	1.42264	0.88	0	A07EC Aminosalicylic acid and similar agents	0.957
p6m	F	A07EC	3430	48	24197	481	-0.2755	0.7592	0.560605	1.02812	0.075	0	A07EC Aminosalicylic acid and similar agents	0.256
p6m	F	A07EC	3441	37	24298	380	-0.314	0.7305	0.517911	1.03041	0.074	0	A07EC Aminosalicylic acid and similar agents	0.26
p6m	F	A07EC	3441	37	24334	344	-0.217	0.8049	0.569621	1.13739	0.22	0	A07EC Aminosalicylic acid and similar agents	0.485
p6m	F	A07EC	3447	31	24379	299	-0.243	0.7843	0.538267	1.14266	0.21	0	A07EC Aminosalicylic acid and similar agents	0.575
p6m	G	A07EC	1155	16	24379	299	0.0627	1.0647	0.638897	1.7742	0.81	0	A07EC Aminosalicylic acid and similar agents	0.896
p6m	G	A07EC	1153	18	24298	380	-0.061	0.9408	0.581853	1.52125	0.8	0	A07EC Aminosalicylic acid and similar agents	0.905
p6m	G	A07EC	1153	18	24334	344	0.0395	1.0403	0.642635	1.68399	0.87	0	A07EC Aminosalicylic acid and similar agents	0.946
p6m	G	A07EC	1146	25	24197	481	0.0249	1.0252	0.680091	1.54541	0.91	0	A07EC Aminosalicylic acid and similar agents	0.953
p6m	A	A08AB	1164	7	2299	8	0.5732	1.774	0.610929	5.15121	0.29	0	A08AB Peripherally acting antiobesity products	0.518
p6m	A	A08AB	1166	5	2302	5	0.6462	1.9083	0.527052	6.90909	0.33	0	A08AB Peripherally acting antiobesity products	0.531
p6m	A	A08AB	1153	18	2285	22	0.3734	1.4527	0.7336	2.8768	0.28	0	A08AB Peripherally acting antiobesity products	0.534
p6m	C	A08AB	1166	5	362177	359	0.7413	2.0986	0.856759	5.14053	0.1	0	A08AB Peripherally acting antiobesity products	0.162
p6m	C	A08AB	1153	18	360564	1972	0.359	1.4319	0.884554	2.3179	0.14	0	A08AB Peripherally acting antiobesity products	0.252
p6m	C	A08AB	1164	7	361788	748	0.3768	1.4576	0.683362	3.10923	0.33	0	A08AB Peripherally acting antiobesity products	0.444
p6m	E	A08AB	3470	8	362370	166	0.9652	2.6254	1.28007	5.38469	0.0084	-1	A08AB Peripherally acting antiobesity products	0.0176
p6m	E	A08AB	3468	10	362177	359	0.4652	1.5923	0.844033	3.00385	0.15	0	A08AB Peripherally acting antiobesity products	0.288
p6m	E	A08AB	3438	40	360564	1972	0.1892	1.2083	0.875165	1.66815	0.25	0	A08AB Peripherally acting antiobesity products	0.385
p6m	E	A08AB	3463	15	361788	748	0.1583	1.1716	0.698105	1.96611	0.55	0	A08AB Peripherally acting antiobesity products	0.713
p6m	F	A08AB	3470	8	24651	27	0.4408	1.554	0.694044	3.47927	0.28	0	A08AB Peripherally acting antiobesity products	0.634
p6m	F	A08AB	3463	15	24595	83	-0.112	0.894	0.508271	1.57247	0.7	0	A08AB Peripherally acting antiobesity products	0.85
p6m	F	A08AB	3468	10	24626	52	-0.0497	0.9515	0.475743	1.90311	0.89	0	A08AB Peripherally acting antiobesity products	0.919
p6m	F	A08AB	3438	40	24462	216	-0.0178	0.9824	0.690445	1.39774	0.92	0	A08AB Peripherally acting antiobesity products	0.968
p6m	G	A08AB	1166	5	24626	52	0.3873	1.473	0.579877	3.7417	0.41	0	A08AB Peripherally acting antiobesity products	0.627
p6m	G	A08AB	1153	18	24462	216	0.2034	1.2256	0.742784	2.02213	0.43	0	A08AB Peripherally acting antiobesity products	0.731
p6m	G	A08AB	1164	7	24595	83	0.2117	1.2358	0.562411	2.71558	0.6	0	A08AB Peripherally acting antiobesity products	0.845
p6m	E	A09AA	3473	5	361585	951	-0.7856	0.4559	0.188714	1.1012	0.081	0	A09AA Enzyme preparations	0.179
p6m	F	A09AA	3473	5	24494	184	-1.5243	0.2178	0.0891805	0.531756	0.00082	1	A09AA Enzyme preparations	0.0145
p6m	A	A09AB	1157	14	2291	16	-0.35	0.7047	0.326391	1.52136	0.37	0	A09AB Acid preparations	0.622
p6m	A	A09AB	1166	5	2301	6	-0.1621	0.8504	0.251158	2.87891	0.79	0	A09AB Acid preparations	0.877
p6m	C	A09AB	1166	5	362395	141	1.5292	4.6143	1.84889	11.5161	0.001	-1	A09AB Acid preparations	0.00319
p6m	C	A09AB	1166	5	362175	361	0.4366	1.5474	0.623962	3.83757	0.35	0	A09AB Acid preparations	0.459
p6m	C	A09AB	1157	14	360739	1797	0.0786	1.0817	0.630412	1.85618	0.78	0	A09AB Acid preparations	0.858
p6m	E	A09AB	3473	5	362506	30	2.6739	14.4959	5.50101	38.1987	6.4e-08	-1	A09AB Acid preparations	3.12e-07
p6m	E	A09AB	3469	9	362395	141	1.5192	4.5688	2.29487	9.0959	1.5e-05	-1	A09AB Acid preparations	9.38e-05
p6m	E	A09AB	3467	11	362175	361	0.6686	1.9514	1.05363	3.61425	0.034	-1	A09AB Acid preparations	0.0882
p6m	E	A09AB	3448	30	360739	1797	0.208	1.2312	0.85123	1.78077	0.27	0	A09AB Acid preparations	0.406
p6m	F	A09AB	3469	9	24654	24	1.1171	3.0561	1.39573	6.69159	0.0052	-1	A09AB Acid preparations	0.0542
p6m	F	A09AB	3473	5	24667	11	1.4001	4.0556	1.39615	11.7807	0.01	-1	A09AB Acid preparations	0.0821
p6m	F	A09AB	3467	11	24618	60	0.2254	1.2528	0.644498	2.43544	0.51	0	A09AB Acid preparations	0.734
p6m	F	A09AB	3448	30	24448	230	-0.037	0.9637	0.650408	1.4279	0.85	0	A09AB Acid preparations	0.943
p6m	G	A09AB	1166	5	24654	24	1.3185	3.738	1.38291	10.1036	0.0094	-1	A09AB Acid preparations	0.0644
p6m	G	A09AB	1157	14	24448	230	-0.1933	0.8243	0.471942	1.43958	0.5	0	A09AB Acid preparations	0.789
p6m	G	A09AB	1166	5	24618	60	0.0722	1.0748	0.41613	2.77624	0.88	0	A09AB Acid preparations	0.945
p6m	A	A10AB	1105	66	2267	40	0.3629	1.4375	0.893346	2.31313	0.14	0	A10AB Insulins and analogues for injection, fast-acting	0.327
p6m	A	A10AB	1048	123	2217	90	0.3479	1.4161	0.967356	2.07311	0.074	0	A10AB Insulins and analogues for injection, fast-acting	0.33
p6m	A	A10AB	1073	98	2234	73	0.2963	1.3449	0.903903	2.00114	0.14	0	A10AB Insulins and analogues for injection, fast-acting	0.388
p6m	A	A10AB	1088	83	2247	60	0.271	1.3113	0.85988	1.99963	0.21	0	A10AB Insulins and analogues for injection, fast-acting	0.405
p6m	B	A10AB	133	14	3239	92	0.7636	2.1461	0.99565	4.62574	0.051	0	A10AB Insulins and analogues for injection, fast-acting	0.123
p6m	B	A10AB	125	22	3140	191	0.7329	2.0811	1.02755	4.21488	0.042	-1	A10AB Insulins and analogues for injection, fast-acting	0.217
p6m	B	A10AB	131	16	3204	127	0.6318	1.881	0.900899	3.92756	0.092	0	A10AB Insulins and analogues for injection, fast-acting	0.275
p6m	B	A10AB	130	17	3177	154	0.5506	1.7344	0.844531	3.56175	0.13	0	A10AB Insulins and analogues for injection, fast-acting	0.341
p6m	C	A10AB	1105	66	357218	5318	0.4591	1.5826	1.18246	2.1182	0.002	-1	A10AB Insulins and analogues for injection, fast-acting	0.00415
p6m	C	A10AB	1088	83	353404	9132	0.087	1.0909	0.830152	1.43346	0.53	0	A10AB Insulins and analogues for injection, fast-acting	0.667
p6m	C	A10AB	1048	123	348116	14420	0.0563	1.0579	0.819655	1.36535	0.67	0	A10AB Insulins and analogues for injection, fast-acting	0.787
p6m	C	A10AB	1073	98	351206	11330	0.0463	1.0474	0.805525	1.36178	0.73	0	A10AB Insulins and analogues for injection, fast-acting	0.791
p6m	D	A10AB	133	14	357218	5318	1.01	2.7456	1.38672	5.43618	0.0037	-1	A10AB Insulins and analogues for injection, fast-acting	0.00802
p6m	D	A10AB	131	16	353404	9132	0.5063	1.6591	0.851349	3.23341	0.14	0	A10AB Insulins and analogues for injection, fast-acting	0.223
p6m	D	A10AB	125	22	348116	14420	0.4054	1.5	0.781934	2.87733	0.22	0	A10AB Insulins and analogues for injection, fast-acting	0.407
p6m	D	A10AB	130	17	351206	11330	0.3086	1.3615	0.703492	2.6348	0.36	0	A10AB Insulins and analogues for injection, fast-acting	0.462
p6m	E	A10AB	3372	106	357218	5318	0.2533	1.2883	1.03223	1.60796	0.025	-1	A10AB Insulins and analogues for injection, fast-acting	0.0488
p6m	E	A10AB	3265	213	348116	14420	-0.1178	0.8889	0.740918	1.06635	0.2	0	A10AB Insulins and analogues for injection, fast-acting	0.341
p6m	E	A10AB	3307	171	351206	11330	-0.0844	0.9191	0.7598	1.11172	0.39	0	A10AB Insulins and analogues for injection, fast-acting	0.568
p6m	E	A10AB	3335	143	353404	9132	-0.0369	0.9637	0.788653	1.17771	0.72	0	A10AB Insulins and analogues for injection, fast-acting	0.831
p6m	F	A10AB	3265	213	23029	1649	-0.183	0.8328	0.686909	1.00967	0.063	0	A10AB Insulins and analogues for injection, fast-acting	0.244
p6m	F	A10AB	3307	171	23349	1329	-0.1705	0.8433	0.689895	1.03077	0.096	0	A10AB Insulins and analogues for injection, fast-acting	0.303
p6m	F	A10AB	3335	143	23586	1092	-0.1493	0.8613	0.696916	1.06439	0.17	0	A10AB Insulins and analogues for injection, fast-acting	0.42
p6m	F	A10AB	3372	106	23847	831	-0.164	0.8487	0.671557	1.0726	0.17	0	A10AB Insulins and analogues for injection, fast-acting	0.515
p6m	G	A10AB	1105	66	23847	831	0.0649	1.067	0.791396	1.43869	0.67	0	A10AB Insulins and analogues for injection, fast-acting	0.8
p6m	G	A10AB	1073	98	23349	1329	-0.0253	0.9751	0.746113	1.27426	0.85	0	A10AB Insulins and analogues for injection, fast-acting	0.945
p6m	G	A10AB	1048	123	23029	1649	-0.002	0.998	0.769274	1.29477	0.99	0	A10AB Insulins and analogues for injection, fast-acting	0.99
p6m	G	A10AB	1088	83	23586	1092	-0.0002	0.9998	0.756439	1.32156	1	0	A10AB Insulins and analogues for injection, fast-acting	1
p6m	H	A10AB	133	14	23847	831	0.6923	1.9984	1.01136	3.94861	0.046	-1	A10AB Insulins and analogues for injection, fast-acting	0.109
p6m	H	A10AB	131	16	23586	1092	0.4802	1.6164	0.833118	3.13596	0.16	0	A10AB Insulins and analogues for injection, fast-acting	0.31
p6m	H	A10AB	125	22	23029	1649	0.3931	1.4816	0.778385	2.82006	0.23	0	A10AB Insulins and analogues for injection, fast-acting	0.62
p6m	H	A10AB	130	17	23349	1329	0.2883	1.3341	0.694357	2.56325	0.39	0	A10AB Insulins and analogues for injection, fast-acting	0.629
p6m	A	A10AC	1153	18	2298	9	0.508	1.662	0.683921	4.03853	0.26	0	A10AC Insulins and analogues for injection, intermediate-acting	0.522
p6m	A	A10AC	1160	11	2301	6	0.2443	1.2767	0.42954	3.795	0.66	0	A10AC Insulins and analogues for injection, intermediate-acting	0.788
p6m	A	A10AC	1160	11	2300	7	0.1057	1.1115	0.392558	3.14687	0.84	0	A10AC Insulins and analogues for injection, intermediate-acting	0.883
p6m	A	A10AC	1160	11	2300	7	0.1057	1.1115	0.392558	3.14687	0.84	0	A10AC Insulins and analogues for injection, intermediate-acting	0.912
p6m	B	A10AC	142	5	3309	22	0.8243	2.2804	0.701975	7.40767	0.17	0	A10AC Insulins and analogues for injection, intermediate-acting	0.502
p6m	C	A10AC	1160	11	361852	684	0.5051	1.6571	0.889978	3.08558	0.11	0	A10AC Insulins and analogues for injection, intermediate-acting	0.159
p6m	C	A10AC	1153	18	361036	1500	0.2234	1.2504	0.765197	2.04319	0.37	0	A10AC Insulins and analogues for injection, intermediate-acting	0.499
p6m	C	A10AC	1160	11	361478	1058	0.0716	1.0742	0.579716	1.99043	0.82	0	A10AC Insulins and analogues for injection, intermediate-acting	0.872
p6m	C	A10AC	1160	11	361351	1185	-0.0363	0.9644	0.521008	1.78505	0.91	0	A10AC Insulins and analogues for injection, intermediate-acting	0.937
p6m	D	A10AC	142	5	361036	1500	0.8877	2.4295	0.923139	6.39397	0.072	0	A10AC Insulins and analogues for injection, intermediate-acting	0.182
p6m	E	A10AC	3461	17	361852	684	0.3769	1.4578	0.887819	2.39371	0.14	0	A10AC Insulins and analogues for injection, intermediate-acting	0.2
p6m	E	A10AC	3460	18	361351	1185	-0.0989	0.9058	0.561414	1.46155	0.69	0	A10AC Insulins and analogues for injection, intermediate-acting	0.838
p6m	E	A10AC	3451	27	361036	1500	0.0572	1.0589	0.712582	1.57339	0.78	0	A10AC Insulins and analogues for injection, intermediate-acting	0.859
p6m	E	A10AC	3460	18	361478	1058	0.0164	1.0165	0.629506	1.64137	0.95	0	A10AC Insulins and analogues for injection, intermediate-acting	0.972
p6m	F	A10AC	3460	18	24508	170	-0.3165	0.7287	0.439866	1.20712	0.22	0	A10AC Insulins and analogues for injection, intermediate-acting	0.481
p6m	F	A10AC	3460	18	24525	153	-0.2234	0.7998	0.481053	1.32979	0.39	0	A10AC Insulins and analogues for injection, intermediate-acting	0.631
p6m	F	A10AC	3451	27	24460	218	-0.174	0.8403	0.551785	1.27978	0.42	0	A10AC Insulins and analogues for injection, intermediate-acting	0.65
p6m	F	A10AC	3461	17	24555	123	-0.0044	0.9956	0.587577	1.6871	0.99	0	A10AC Insulins and analogues for injection, intermediate-acting	0.995
p6m	G	A10AC	1160	11	24555	123	0.2177	1.2432	0.656246	2.355	0.5	0	A10AC Insulins and analogues for injection, intermediate-acting	0.686
p6m	G	A10AC	1160	11	24508	170	-0.1331	0.8754	0.466074	1.64419	0.68	0	A10AC Insulins and analogues for injection, intermediate-acting	0.87
p6m	G	A10AC	1153	18	24460	218	0.0799	1.0832	0.652908	1.79701	0.76	0	A10AC Insulins and analogues for injection, intermediate-acting	0.914
p6m	G	A10AC	1160	11	24525	153	-0.0293	0.9711	0.515651	1.82887	0.93	0	A10AC Insulins and analogues for injection, intermediate-acting	0.965
p6m	H	A10AC	142	5	24460	218	0.8473	2.3333	0.878098	6.20028	0.089	0	A10AC Insulins and analogues for injection, intermediate-acting	0.381
p6m	A	A10AD	1147	24	2299	8	0.6455	1.907	0.804249	4.52183	0.14	0	A10AD Insulins and analogues for injection, intermediate- or long-acting combined with fast-acting	0.327
p6m	A	A10AD	1143	28	2297	10	0.5956	1.8141	0.825539	3.98642	0.14	0	A10AD Insulins and analogues for injection, intermediate- or long-acting combined with fast-acting	0.388
p6m	A	A10AD	1144	27	2297	10	0.5107	1.6664	0.756227	3.67214	0.2	0	A10AD Insulins and analogues for injection, intermediate- or long-acting combined with fast-acting	0.405
p6m	A	A10AD	1140	31	2294	13	0.4667	1.5947	0.778041	3.2685	0.2	0	A10AD Insulins and analogues for injection, intermediate- or long-acting combined with fast-acting	0.478
p6m	B	A10AD	141	6	3300	31	0.6217	1.8621	0.639367	5.42344	0.25	0	A10AD Insulins and analogues for injection, intermediate- or long-acting combined with fast-acting	0.468
p6m	B	A10AD	141	6	3299	32	0.6132	1.8464	0.63531	5.36625	0.26	0	A10AD Insulins and analogues for injection, intermediate- or long-acting combined with fast-acting	0.52
p6m	B	A10AD	142	5	3304	27	0.4762	1.61	0.510475	5.07773	0.42	0	A10AD Insulins and analogues for injection, intermediate- or long-acting combined with fast-acting	0.574
p6m	B	A10AD	141	6	3293	38	0.4462	1.5623	0.548932	4.44669	0.4	0	A10AD Insulins and analogues for injection, intermediate- or long-acting combined with fast-acting	0.719
p6m	C	A10AD	1147	24	361418	1118	0.796	2.2167	1.4361	3.42151	0.00032	-1	A10AD Insulins and analogues for injection, intermediate- or long-acting combined with fast-acting	0.000817
p6m	C	A10AD	1144	27	360968	1568	0.5244	1.6894	1.11772	2.55345	0.013	-1	A10AD Insulins and analogues for injection, intermediate- or long-acting combined with fast-acting	0.0308
p6m	C	A10AD	1143	28	360846	1690	0.475	1.608	1.0709	2.41442	0.022	-1	A10AD Insulins and analogues for injection, intermediate- or long-acting combined with fast-acting	0.054
p6m	C	A10AD	1140	31	360541	1995	0.3785	1.4601	0.987376	2.15926	0.058	0	A10AD Insulins and analogues for injection, intermediate- or long-acting combined with fast-acting	0.134
p6m	D	A10AD	142	5	361418	1118	1.23	3.4212	1.3014	8.99377	0.013	-1	A10AD Insulins and analogues for injection, intermediate- or long-acting combined with fast-acting	0.023
p6m	D	A10AD	141	6	360968	1568	0.9759	2.6536	1.07617	6.54323	0.034	-1	A10AD Insulins and analogues for injection, intermediate- or long-acting combined with fast-acting	0.0658
p6m	D	A10AD	141	6	360846	1690	0.8545	2.3503	0.95316	5.79526	0.064	0	A10AD Insulins and analogues for injection, intermediate- or long-acting combined with fast-acting	0.123
p6m	D	A10AD	141	6	360541	1995	0.5302	1.6993	0.680677	4.24207	0.26	0	A10AD Insulins and analogues for injection, intermediate- or long-acting combined with fast-acting	0.461
p6m	E	A10AD	3446	32	361418	1118	0.5193	1.6809	1.16228	2.43092	0.0058	-1	A10AD Insulins and analogues for injection, intermediate- or long-acting combined with fast-acting	0.013
p6m	E	A10AD	3441	37	360968	1568	0.2948	1.3429	0.950576	1.89716	0.094	0	A10AD Insulins and analogues for injection, intermediate- or long-acting combined with fast-acting	0.196
p6m	E	A10AD	3440	38	360846	1690	0.231	1.2599	0.895661	1.77216	0.18	0	A10AD Insulins and analogues for injection, intermediate- or long-acting combined with fast-acting	0.325
p6m	E	A10AD	3434	44	360541	1995	0.1943	1.2145	0.881765	1.67277	0.23	0	A10AD Insulins and analogues for injection, intermediate- or long-acting combined with fast-acting	0.372
p6m	F	A10AD	3441	37	24454	224	0.1956	1.2161	0.837782	1.76523	0.3	0	A10AD Insulins and analogues for injection, intermediate- or long-acting combined with fast-acting	0.582
p6m	F	A10AD	3446	32	24491	187	0.225	1.2523	0.840521	1.8659	0.27	0	A10AD Insulins and analogues for injection, intermediate- or long-acting combined with fast-acting	0.634
p6m	F	A10AD	3440	38	24436	242	0.132	1.1411	0.79093	1.64632	0.48	0	A10AD Insulins and analogues for injection, intermediate- or long-acting combined with fast-acting	0.699
p6m	F	A10AD	3434	44	24382	296	0.051	1.0523	0.747555	1.48125	0.77	0	A10AD Insulins and analogues for injection, intermediate- or long-acting combined with fast-acting	0.9
p6m	G	A10AD	1147	24	24491	187	0.4363	1.547	0.978677	2.44529	0.062	0	A10AD Insulins and analogues for injection, intermediate- or long-acting combined with fast-acting	0.219
p6m	G	A10AD	1144	27	24454	224	0.3742	1.4538	0.94184	2.24414	0.091	0	A10AD Insulins and analogues for injection, intermediate- or long-acting combined with fast-acting	0.285
p6m	G	A10AD	1143	28	24436	242	0.337	1.4007	0.914855	2.14459	0.12	0	A10AD Insulins and analogues for injection, intermediate- or long-acting combined with fast-acting	0.375
p6m	G	A10AD	1140	31	24382	296	0.2237	1.2507	0.833303	1.87724	0.28	0	A10AD Insulins and analogues for injection, intermediate- or long-acting combined with fast-acting	0.602
p6m	H	A10AD	141	6	24454	224	0.8025	2.2312	0.887368	5.60999	0.088	0	A10AD Insulins and analogues for injection, intermediate- or long-acting combined with fast-acting	0.191
p6m	H	A10AD	142	5	24491	187	0.8131	2.2549	0.840748	6.04767	0.11	0	A10AD Insulins and analogues for injection, intermediate- or long-acting combined with fast-acting	0.22
p6m	H	A10AD	141	6	24436	242	0.7334	2.0821	0.831443	5.21416	0.12	0	A10AD Insulins and analogues for injection, intermediate- or long-acting combined with fast-acting	0.308
p6m	H	A10AD	141	6	24382	296	0.4235	1.5272	0.607382	3.84019	0.37	0	A10AD Insulins and analogues for injection, intermediate- or long-acting combined with fast-acting	0.685
p6m	A	A10AE	1139	32	2294	13	0.8562	2.3542	1.14402	4.84469	0.02	-1	A10AE Insulins and analogues for injection, long-acting	0.146
p6m	A	A10AE	1146	25	2296	11	0.7005	2.0147	0.908334	4.4686	0.085	0	A10AE Insulins and analogues for injection, long-acting	0.295
p6m	A	A10AE	1149	22	2297	10	0.5727	1.7731	0.773438	4.06482	0.18	0	A10AE Insulins and analogues for injection, long-acting	0.399
p6m	A	A10AE	1153	18	2299	8	0.4546	1.5755	0.638287	3.88889	0.32	0	A10AE Insulins and analogues for injection, long-acting	0.498
p6m	B	A10AE	141	6	3311	20	0.9932	2.6999	0.856209	8.51364	0.09	0	A10AE Insulins and analogues for injection, long-acting	0.192
p6m	B	A10AE	141	6	3305	26	0.7128	2.0397	0.670107	6.20874	0.21	0	A10AE Insulins and analogues for injection, long-acting	0.42
p6m	B	A10AE	141	6	3301	30	0.6261	1.8704	0.624954	5.59768	0.26	0	A10AE Insulins and analogues for injection, long-acting	0.52
p6m	B	A10AE	141	6	3292	39	0.3393	1.404	0.48749	4.04354	0.53	0	A10AE Insulins and analogues for injection, long-acting	0.812
p6m	C	A10AE	1139	32	359316	3220	0.1452	1.1562	0.787634	1.69729	0.46	0	A10AE Insulins and analogues for injection, long-acting	0.598
p6m	C	A10AE	1153	18	360802	1734	0.1439	1.1548	0.705846	1.88921	0.57	0	A10AE Insulins and analogues for injection, long-acting	0.644
p6m	C	A10AE	1149	22	359792	2744	-0.0813	0.9219	0.588154	1.44506	0.72	0	A10AE Insulins and analogues for injection, long-acting	0.807
p6m	C	A10AE	1146	25	359587	2949	-0.0095	0.9906	0.647593	1.51522	0.96	0	A10AE Insulins and analogues for injection, long-acting	0.974
p6m	D	A10AE	141	6	360802	1734	0.9741	2.6489	1.05458	6.65353	0.038	-1	A10AE Insulins and analogues for injection, long-acting	0.057
p6m	D	A10AE	141	6	359792	2744	0.5383	1.7131	0.687065	4.27143	0.25	0	A10AE Insulins and analogues for injection, long-acting	0.353
p6m	D	A10AE	141	6	359587	2949	0.4793	1.6149	0.648954	4.01854	0.3	0	A10AE Insulins and analogues for injection, long-acting	0.423
p6m	D	A10AE	141	6	359316	3220	0.3021	1.3527	0.543267	3.36808	0.52	0	A10AE Insulins and analogues for injection, long-acting	0.686
p6m	E	A10AE	3446	32	359792	2744	-0.4124	0.662	0.459028	0.954834	0.027	1	A10AE Insulins and analogues for injection, long-acting	0.0723
p6m	E	A10AE	3442	36	359587	2949	-0.3614	0.6967	0.49232	0.985853	0.041	1	A10AE Insulins and analogues for injection, long-acting	0.102
p6m	E	A10AE	3433	45	359316	3220	-0.2285	0.7957	0.58069	1.09034	0.15	0	A10AE Insulins and analogues for injection, long-acting	0.277
p6m	E	A10AE	3452	26	360802	1734	-0.1713	0.8425	0.562577	1.26181	0.41	0	A10AE Insulins and analogues for injection, long-acting	0.492
p6m	F	A10AE	3446	32	24320	358	-0.5991	0.5493	0.374379	0.805971	0.0022	1	A10AE Insulins and analogues for injection, long-acting	0.0354
p6m	F	A10AE	3442	36	24294	384	-0.5457	0.5794	0.402566	0.833951	0.0033	1	A10AE Insulins and analogues for injection, long-acting	0.0457
p6m	F	A10AE	3452	26	24388	290	-0.5784	0.5608	0.368002	0.854548	0.0071	1	A10AE Insulins and analogues for injection, long-acting	0.0758
p6m	F	A10AE	3433	45	24248	430	-0.4265	0.6528	0.468385	0.909729	0.012	1	A10AE Insulins and analogues for injection, long-acting	0.0809
p6m	G	A10AE	1149	22	24320	358	-0.2582	0.7724	0.487354	1.22417	0.27	0	A10AE Insulins and analogues for injection, long-acting	0.561
p6m	G	A10AE	1153	18	24388	290	-0.235	0.7906	0.478137	1.30715	0.36	0	A10AE Insulins and analogues for injection, long-acting	0.589
p6m	G	A10AE	1146	25	24294	384	-0.1873	0.8292	0.536182	1.28246	0.4	0	A10AE Insulins and analogues for injection, long-acting	0.692
p6m	G	A10AE	1139	32	24248	430	-0.0608	0.941	0.633664	1.39749	0.76	0	A10AE Insulins and analogues for injection, long-acting	0.914
p6m	H	A10AE	141	6	24388	290	0.7653	2.1496	0.860311	5.37118	0.1	0	A10AE Insulins and analogues for injection, long-acting	0.211
p6m	H	A10AE	141	6	24320	358	0.5079	1.6618	0.668666	4.12997	0.27	0	A10AE Insulins and analogues for injection, long-acting	0.437
p6m	H	A10AE	141	6	24294	384	0.4508	1.5695	0.633041	3.8913	0.33	0	A10AE Insulins and analogues for injection, long-acting	0.589
p6m	H	A10AE	141	6	24248	430	0.2262	1.2539	0.504253	3.11794	0.63	0	A10AE Insulins and analogues for injection, long-acting	0.818
p6m	A	A10BA	1035	136	2139	168	-0.4327	0.6488	0.467352	0.900609	0.0097	1	A10BA Biguanides [DG:DG01684]	0.0926
p6m	A	A10BA	1046	125	2156	151	-0.3429	0.7097	0.509189	0.989161	0.043	1	A10BA Biguanides [DG:DG01684]	0.164
p6m	A	A10BA	1015	156	2127	180	-0.3719	0.6894	0.496791	0.956677	0.026	1	A10BA Biguanides [DG:DG01684]	0.164
p6m	A	A10BA	1062	109	2175	132	-0.3337	0.7163	0.507934	1.01012	0.057	0	A10BA Biguanides [DG:DG01684]	0.181
p6m	B	A10BA	133	14	3041	290	-0.7002	0.4965	0.246515	0.999929	0.05	0	A10BA Biguanides [DG:DG01684]	0.192
p6m	B	A10BA	133	14	3069	262	-0.4014	0.6694	0.334459	1.33979	0.26	0	A10BA Biguanides [DG:DG01684]	0.47
p6m	B	A10BA	134	13	3103	228	-0.2985	0.742	0.363728	1.51349	0.41	0	A10BA Biguanides [DG:DG01684]	0.574
p6m	B	A10BA	124	23	3018	313	-0.1626	0.8499	0.443284	1.62952	0.62	0	A10BA Biguanides [DG:DG01684]	0.818
p6m	C	A10BA	1046	125	341469	21067	-0.3754	0.687	0.543051	0.869088	0.0018	1	A10BA Biguanides [DG:DG01684]	0.0052
p6m	C	A10BA	1035	136	340207	22329	-0.3505	0.7043	0.557957	0.889144	0.0032	1	A10BA Biguanides [DG:DG01684]	0.011
p6m	C	A10BA	1015	156	337810	24726	-0.3474	0.7065	0.559059	0.892948	0.0036	1	A10BA Biguanides [DG:DG01684]	0.0125
p6m	C	A10BA	1062	109	346774	15762	-0.097	0.9076	0.715749	1.15075	0.42	0	A10BA Biguanides [DG:DG01684]	0.502
p6m	D	A10BA	133	14	340207	22329	-0.9629	0.3818	0.198276	0.735168	0.004	1	A10BA Biguanides [DG:DG01684]	0.0118
p6m	D	A10BA	133	14	341469	21067	-0.8062	0.4466	0.232961	0.856021	0.015	1	A10BA Biguanides [DG:DG01684]	0.0318
p6m	D	A10BA	134	13	346774	15762	-0.4024	0.6687	0.347549	1.28669	0.23	0	A10BA Biguanides [DG:DG01684]	0.289
p6m	D	A10BA	124	23	337810	24726	-0.4066	0.6659	0.362142	1.22458	0.19	0	A10BA Biguanides [DG:DG01684]	0.386
p6m	E	A10BA	3202	276	341469	21067	-0.1902	0.8268	0.706164	0.968017	0.018	1	A10BA Biguanides [DG:DG01684]	0.0526
p6m	E	A10BA	3142	336	337810	24726	-0.1569	0.8548	0.731772	0.998582	0.048	1	A10BA Biguanides [DG:DG01684]	0.122
p6m	E	A10BA	3174	304	340207	22329	-0.1289	0.879	0.752923	1.02626	0.1	0	A10BA Biguanides [DG:DG01684]	0.202
p6m	E	A10BA	3237	241	346774	15762	0.0666	1.0689	0.911376	1.25361	0.41	0	A10BA Biguanides [DG:DG01684]	0.492
p6m	F	A10BA	3174	304	22659	2019	0.0973	1.1022	0.937859	1.2954	0.24	0	A10BA Biguanides [DG:DG01684]	0.486
p6m	F	A10BA	3142	336	22374	2304	0.0375	1.0382	0.883339	1.2202	0.65	0	A10BA Biguanides [DG:DG01684]	0.818
p6m	F	A10BA	3202	276	22789	1889	0.0374	1.0381	0.880642	1.22377	0.66	0	A10BA Biguanides [DG:DG01684]	0.83
p6m	F	A10BA	3237	241	23005	1673	0.0171	1.0173	0.858052	1.20602	0.84	0	A10BA Biguanides [DG:DG01684]	0.935
p6m	G	A10BA	1062	109	23005	1673	-0.1205	0.8865	0.695326	1.13025	0.33	0	A10BA Biguanides [DG:DG01684]	0.571
p6m	G	A10BA	1046	125	22789	1889	-0.1046	0.9007	0.711751	1.13974	0.38	0	A10BA Biguanides [DG:DG01684]	0.617
p6m	G	A10BA	1015	156	22374	2304	-0.1155	0.8909	0.705881	1.1244	0.33	0	A10BA Biguanides [DG:DG01684]	0.642
p6m	G	A10BA	1035	136	22659	2019	-0.0786	0.9244	0.732487	1.16651	0.51	0	A10BA Biguanides [DG:DG01684]	0.808
p6m	H	A10BA	133	14	22789	1889	-0.5758	0.5623	0.294145	1.07474	0.082	0	A10BA Biguanides [DG:DG01684]	0.191
p6m	H	A10BA	134	13	23005	1673	-0.481	0.6181	0.319313	1.19666	0.15	0	A10BA Biguanides [DG:DG01684]	0.266
p6m	H	A10BA	133	14	22659	2019	-0.7119	0.4907	0.255827	0.941205	0.032	1	A10BA Biguanides [DG:DG01684]	0.1
p6m	H	A10BA	124	23	22374	2304	-0.2236	0.7997	0.439344	1.45553	0.46	0	A10BA Biguanides [DG:DG01684]	0.732
p6m	A	A10BB	1142	29	2262	45	-0.6107	0.543	0.316242	0.932178	0.027	1	A10BB Sulfonylureas	0.111
p6m	A	A10BB	1135	36	2256	51	-0.5263	0.5908	0.357537	0.97624	0.04	1	A10BB Sulfonylureas	0.164
p6m	A	A10BB	1126	45	2251	56	-0.422	0.6557	0.409773	1.04926	0.079	0	A10BB Sulfonylureas	0.292
p6m	A	A10BB	1105	66	2241	66	-0.1443	0.8656	0.564013	1.32846	0.51	0	A10BB Sulfonylureas	0.71
p6m	B	A10BB	141	6	3236	95	-0.2916	0.747	0.289172	1.92984	0.55	0	A10BB Sulfonylureas	0.764
p6m	B	A10BB	142	5	3262	69	0.0844	1.0881	0.381538	3.10292	0.88	0	A10BB Sulfonylureas	0.928
p6m	B	A10BB	141	6	3250	81	0.0286	1.029	0.391872	2.70195	0.95	0	A10BB Sulfonylureas	0.96
p6m	B	A10BB	138	9	3208	123	-0.0216	0.9786	0.428287	2.23613	0.96	0	A10BB Sulfonylureas	0.984
p6m	C	A10BB	1135	36	356435	6101	-0.4196	0.6573	0.459134	0.940937	0.022	1	A10BB Sulfonylureas	0.0468
p6m	C	A10BB	1126	45	355595	6941	-0.3144	0.7302	0.525997	1.01373	0.06	0	A10BB Sulfonylureas	0.12
p6m	C	A10BB	1142	29	358108	4428	-0.3074	0.7353	0.496052	1.09007	0.13	0	A10BB Sulfonylureas	0.18
p6m	C	A10BB	1105	66	353660	8876	-0.1632	0.8494	0.63763	1.13158	0.27	0	A10BB Sulfonylureas	0.412
p6m	D	A10BB	141	6	355595	6941	-0.5242	0.592	0.24503	1.43042	0.24	0	A10BB Sulfonylureas	0.358
p6m	D	A10BB	141	6	356435	6101	-0.3646	0.6945	0.287126	1.67972	0.42	0	A10BB Sulfonylureas	0.498
p6m	D	A10BB	138	9	353660	8876	-0.353	0.7026	0.329192	1.49954	0.36	0	A10BB Sulfonylureas	0.538
p6m	D	A10BB	142	5	358108	4428	-0.217	0.8049	0.309727	2.09186	0.66	0	A10BB Sulfonylureas	0.725
p6m	E	A10BB	3404	74	358108	4428	0.0824	1.0859	0.844526	1.39637	0.52	0	A10BB Sulfonylureas	0.589
p6m	E	A10BB	3391	87	356435	6101	-0.0968	0.9077	0.717683	1.14803	0.42	0	A10BB Sulfonylureas	0.602
p6m	E	A10BB	3346	132	353660	8876	-0.0627	0.9392	0.767294	1.14959	0.54	0	A10BB Sulfonylureas	0.664
p6m	E	A10BB	3377	101	355595	6941	-0.0738	0.9289	0.744218	1.15942	0.51	0	A10BB Sulfonylureas	0.675
p6m	F	A10BB	3391	87	24045	633	-0.0517	0.9496	0.738596	1.22088	0.69	0	A10BB Sulfonylureas	0.842
p6m	F	A10BB	3377	101	23934	744	-0.0409	0.9599	0.757514	1.21647	0.73	0	A10BB Sulfonylureas	0.857
p6m	F	A10BB	3404	74	24143	535	-0.0368	0.9639	0.736729	1.26108	0.79	0	A10BB Sulfonylureas	0.905
p6m	F	A10BB	3346	132	23725	953	-0.026	0.9743	0.785116	1.20918	0.81	0	A10BB Sulfonylureas	0.921
p6m	G	A10BB	1142	29	24143	535	-0.4049	0.667	0.445312	0.999164	0.05	1	A10BB Sulfonylureas	0.189
p6m	G	A10BB	1135	36	24045	633	-0.3594	0.6981	0.482747	1.00953	0.056	0	A10BB Sulfonylureas	0.237
p6m	G	A10BB	1126	45	23934	744	-0.274	0.7604	0.54252	1.06566	0.11	0	A10BB Sulfonylureas	0.354
p6m	G	A10BB	1105	66	23725	953	-0.1123	0.8937	0.664883	1.20136	0.46	0	A10BB Sulfonylureas	0.74
p6m	H	A10BB	141	6	23934	744	-0.5806	0.5595	0.228735	1.36874	0.2	0	A10BB Sulfonylureas	0.435
p6m	H	A10BB	141	6	24045	633	-0.4103	0.6634	0.269935	1.63049	0.37	0	A10BB Sulfonylureas	0.507
p6m	H	A10BB	142	5	24143	535	-0.41	0.6636	0.251352	1.75219	0.41	0	A10BB Sulfonylureas	0.533
p6m	H	A10BB	138	9	23725	953	-0.3385	0.7128	0.330564	1.53718	0.39	0	A10BB Sulfonylureas	0.701
p6m	A	A10BD	1164	7	2302	5	0.4529	1.5729	0.470591	5.257	0.46	0	A10BD Combinations of oral blood glucose lowering drugs	0.674
p6m	A	A10BD	1165	6	2302	5	0.2165	1.2417	0.356708	4.32231	0.73	0	A10BD Combinations of oral blood glucose lowering drugs	0.835
p6m	A	A10BD	1165	6	2302	5	0.2165	1.2417	0.356708	4.32231	0.73	0	A10BD Combinations of oral blood glucose lowering drugs	0.837
p6m	C	A10BD	1165	6	362208	328	0.6939	2.0014	0.872315	4.592	0.1	0	A10BD Combinations of oral blood glucose lowering drugs	0.162
p6m	C	A10BD	1165	6	362150	386	0.5199	1.6818	0.734754	3.84952	0.22	0	A10BD Combinations of oral blood glucose lowering drugs	0.341
p6m	C	A10BD	1164	7	362036	500	0.4209	1.5233	0.707849	3.27823	0.28	0	A10BD Combinations of oral blood glucose lowering drugs	0.412
p6m	E	A10BD	3467	11	362208	328	0.6386	1.8939	1.02444	3.50134	0.042	-1	A10BD Combinations of oral blood glucose lowering drugs	0.103
p6m	E	A10BD	3467	11	362150	386	0.4582	1.5813	0.857009	2.91759	0.14	0	A10BD Combinations of oral blood glucose lowering drugs	0.262
p6m	E	A10BD	3466	12	362036	500	0.2977	1.3467	0.750349	2.41715	0.32	0	A10BD Combinations of oral blood glucose lowering drugs	0.462
p6m	E	A10BD	3472	6	362286	250	0.2874	1.3329	0.58667	3.02852	0.49	0	A10BD Combinations of oral blood glucose lowering drugs	0.571
p6m	F	A10BD	3467	11	24647	31	0.7282	2.0713	1.01119	4.24292	0.046	-1	A10BD Combinations of oral blood glucose lowering drugs	0.207
p6m	F	A10BD	3467	11	24637	41	0.3841	1.4683	0.735828	2.92994	0.28	0	A10BD Combinations of oral blood glucose lowering drugs	0.535
p6m	F	A10BD	3466	12	24623	55	0.1969	1.2176	0.635544	2.33265	0.55	0	A10BD Combinations of oral blood glucose lowering drugs	0.763
p6m	F	A10BD	3472	6	24650	28	0.2285	1.2567	0.507215	3.11347	0.62	0	A10BD Combinations of oral blood glucose lowering drugs	0.842
p6m	G	A10BD	1165	6	24647	31	0.6965	2.0067	0.804103	5.00777	0.14	0	A10BD Combinations of oral blood glucose lowering drugs	0.381
p6m	G	A10BD	1165	6	24637	41	0.4248	1.5292	0.627715	3.72556	0.35	0	A10BD Combinations of oral blood glucose lowering drugs	0.644
p6m	G	A10BD	1164	7	24623	55	0.3281	1.3883	0.612677	3.14592	0.43	0	A10BD Combinations of oral blood glucose lowering drugs	0.731
p6m	A	A10BG	1165	6	2301	6	-0.3862	0.6796	0.207227	2.22896	0.52	0	A10BG Thiazolidinediones [DG:DG01683]	0.695
p6m	A	A10BG	1166	5	2302	5	-0.3353	0.7151	0.195123	2.62079	0.61	0	A10BG Thiazolidinediones [DG:DG01683]	0.758
p6m	A	A10BG	1159	12	2295	12	-0.182	0.8336	0.348457	1.99411	0.68	0	A10BG Thiazolidinediones [DG:DG01683]	0.829
p6m	C	A10BG	1165	6	361679	857	-0.1259	0.8817	0.389864	1.99392	0.76	0	A10BG Thiazolidinediones [DG:DG01683]	0.815
p6m	C	A10BG	1159	12	361189	1347	0.0999	1.105	0.614376	1.9876	0.74	0	A10BG Thiazolidinediones [DG:DG01683]	0.84
p6m	C	A10BG	1166	5	361815	721	-0.1098	0.896	0.367324	2.18548	0.81	0	A10BG Thiazolidinediones [DG:DG01683]	0.866
p6m	E	A10BG	3454	24	361189	1347	0.1485	1.1601	0.7645	1.7603	0.48	0	A10BG Thiazolidinediones [DG:DG01683]	0.604
p6m	E	A10BG	3468	10	361815	721	-0.076	0.9268	0.492272	1.74484	0.81	0	A10BG Thiazolidinediones [DG:DG01683]	0.898
p6m	E	A10BG	3466	12	361679	857	-0.0754	0.9274	0.5198	1.65457	0.8	0	A10BG Thiazolidinediones [DG:DG01683]	0.905
p6m	E	A10BG	3470	8	362010	526	0.021	1.0213	0.503817	2.07011	0.95	0	A10BG Thiazolidinediones [DG:DG01683]	0.95
p6m	F	A10BG	3454	24	24549	129	0.2358	1.266	0.800699	2.00163	0.31	0	A10BG Thiazolidinediones [DG:DG01683]	0.542
p6m	F	A10BG	3470	8	24632	46	0.3435	1.4099	0.654854	3.03569	0.38	0	A10BG Thiazolidinediones [DG:DG01683]	0.713
p6m	F	A10BG	3468	10	24620	58	0.2251	1.2524	0.627659	2.49913	0.52	0	A10BG Thiazolidinediones [DG:DG01683]	0.741
p6m	F	A10BG	3466	12	24598	80	0.0127	1.0128	0.542293	1.89141	0.97	0	A10BG Thiazolidinediones [DG:DG01683]	0.984
p6m	G	A10BG	1159	12	24549	129	0.2265	1.2542	0.677549	2.3218	0.47	0	A10BG Thiazolidinediones [DG:DG01683]	0.746
p6m	G	A10BG	1166	5	24620	58	0.1645	1.1788	0.465007	2.98804	0.73	0	A10BG Thiazolidinediones [DG:DG01683]	0.883
p6m	G	A10BG	1165	6	24598	80	-0.0029	0.9971	0.427845	2.32398	0.99	0	A10BG Thiazolidinediones [DG:DG01683]	0.99
p6m	A	A10BH	1139	32	2269	38	-0.4715	0.6241	0.363899	1.07025	0.087	0	A10BH Dipeptidyl peptidase 4 (DPP-4) inhibitors [DG:DG01601]	0.239
p6m	A	A10BH	1133	38	2266	41	-0.3241	0.7232	0.433215	1.20716	0.21	0	A10BH Dipeptidyl peptidase 4 (DPP-4) inhibitors [DG:DG01601]	0.405
p6m	A	A10BH	1124	47	2262	45	-0.186	0.8303	0.51217	1.34589	0.45	0	A10BH Dipeptidyl peptidase 4 (DPP-4) inhibitors [DG:DG01601]	0.646
p6m	A	A10BH	1107	64	2252	55	0.0046	1.0047	0.646611	1.56098	0.98	0	A10BH Dipeptidyl peptidase 4 (DPP-4) inhibitors [DG:DG01601]	0.98
p6m	B	A10BH	142	5	3257	74	-0.3478	0.7063	0.253164	1.97024	0.51	0	A10BH Dipeptidyl peptidase 4 (DPP-4) inhibitors [DG:DG01601]	0.66
p6m	B	A10BH	141	6	3245	86	-0.3005	0.7405	0.285176	1.92261	0.54	0	A10BH Dipeptidyl peptidase 4 (DPP-4) inhibitors [DG:DG01601]	0.764
p6m	B	A10BH	142	5	3266	65	-0.1941	0.8236	0.293848	2.30841	0.71	0	A10BH Dipeptidyl peptidase 4 (DPP-4) inhibitors [DG:DG01601]	0.804
p6m	B	A10BH	137	10	3222	109	0.1032	1.1087	0.493354	2.49146	0.8	0	A10BH Dipeptidyl peptidase 4 (DPP-4) inhibitors [DG:DG01601]	0.916
p6m	C	A10BH	1133	38	357107	5429	-0.1865	0.8298	0.585258	1.17664	0.29	0	A10BH Dipeptidyl peptidase 4 (DPP-4) inhibitors [DG:DG01601]	0.416
p6m	C	A10BH	1124	47	356364	6172	-0.095	0.9094	0.659704	1.25352	0.56	0	A10BH Dipeptidyl peptidase 4 (DPP-4) inhibitors [DG:DG01601]	0.659
p6m	C	A10BH	1139	32	358403	4133	-0.0951	0.9093	0.624249	1.32457	0.62	0	A10BH Dipeptidyl peptidase 4 (DPP-4) inhibitors [DG:DG01601]	0.682
p6m	C	A10BH	1107	64	354794	7742	0.003	1.003	0.752458	1.33686	0.98	0	A10BH Dipeptidyl peptidase 4 (DPP-4) inhibitors [DG:DG01601]	0.98
p6m	D	A10BH	142	5	357107	5429	-0.4456	0.6404	0.247596	1.65644	0.36	0	A10BH Dipeptidyl peptidase 4 (DPP-4) inhibitors [DG:DG01601]	0.451
p6m	D	A10BH	141	6	356364	6172	-0.418	0.6584	0.272266	1.59211	0.35	0	A10BH Dipeptidyl peptidase 4 (DPP-4) inhibitors [DG:DG01601]	0.461
p6m	D	A10BH	142	5	358403	4133	-0.1659	0.8471	0.326534	2.19769	0.73	0	A10BH Dipeptidyl peptidase 4 (DPP-4) inhibitors [DG:DG01601]	0.77
p6m	D	A10BH	137	10	354794	7742	-0.017	0.9832	0.473753	2.04038	0.96	0	A10BH Dipeptidyl peptidase 4 (DPP-4) inhibitors [DG:DG01601]	0.976
p6m	E	A10BH	3408	70	358403	4133	0.117	1.1242	0.870926	1.45103	0.37	0	A10BH Dipeptidyl peptidase 4 (DPP-4) inhibitors [DG:DG01601]	0.453
p6m	E	A10BH	3399	79	357107	5429	-0.0445	0.9564	0.750808	1.21839	0.72	0	A10BH Dipeptidyl peptidase 4 (DPP-4) inhibitors [DG:DG01601]	0.831
p6m	E	A10BH	3386	92	356364	6172	-0.0293	0.9711	0.773333	1.21949	0.8	0	A10BH Dipeptidyl peptidase 4 (DPP-4) inhibitors [DG:DG01601]	0.905
p6m	E	A10BH	3359	119	354794	7742	-0.0123	0.9878	0.802819	1.21529	0.91	0	A10BH Dipeptidyl peptidase 4 (DPP-4) inhibitors [DG:DG01601]	0.943
p6m	F	A10BH	3359	119	23876	802	0.0813	1.0847	0.867832	1.35585	0.47	0	A10BH Dipeptidyl peptidase 4 (DPP-4) inhibitors [DG:DG01601]	0.696
p6m	F	A10BH	3386	92	24047	631	0.0703	1.0729	0.839849	1.37055	0.57	0	A10BH Dipeptidyl peptidase 4 (DPP-4) inhibitors [DG:DG01601]	0.788
p6m	F	A10BH	3399	79	24127	551	0.0652	1.0674	0.822874	1.38457	0.62	0	A10BH Dipeptidyl peptidase 4 (DPP-4) inhibitors [DG:DG01601]	0.796
p6m	F	A10BH	3408	70	24202	476	0.0934	1.098	0.834778	1.4441	0.5	0	A10BH Dipeptidyl peptidase 4 (DPP-4) inhibitors [DG:DG01601]	0.801
p6m	G	A10BH	1139	32	24202	476	-0.1699	0.8438	0.571793	1.24509	0.39	0	A10BH Dipeptidyl peptidase 4 (DPP-4) inhibitors [DG:DG01601]	0.589
p6m	G	A10BH	1133	38	24127	551	-0.1471	0.8632	0.600918	1.2401	0.43	0	A10BH Dipeptidyl peptidase 4 (DPP-4) inhibitors [DG:DG01601]	0.631
p6m	G	A10BH	1124	47	24047	631	-0.0479	0.9533	0.683224	1.33005	0.78	0	A10BH Dipeptidyl peptidase 4 (DPP-4) inhibitors [DG:DG01601]	0.903
p6m	G	A10BH	1107	64	23876	802	0.0477	1.0488	0.778099	1.41381	0.75	0	A10BH Dipeptidyl peptidase 4 (DPP-4) inhibitors [DG:DG01601]	0.914
p6m	H	A10BH	142	5	24127	551	-0.5268	0.5905	0.223786	1.558	0.29	0	A10BH Dipeptidyl peptidase 4 (DPP-4) inhibitors [DG:DG01601]	0.453
p6m	H	A10BH	141	6	24047	631	-0.4303	0.6503	0.264821	1.597	0.35	0	A10BH Dipeptidyl peptidase 4 (DPP-4) inhibitors [DG:DG01601]	0.6
p6m	H	A10BH	142	5	24202	476	-0.3117	0.7322	0.277229	1.93381	0.53	0	A10BH Dipeptidyl peptidase 4 (DPP-4) inhibitors [DG:DG01601]	0.646
p6m	H	A10BH	137	10	23876	802	-0.041	0.9598	0.455571	2.02211	0.91	0	A10BH Dipeptidyl peptidase 4 (DPP-4) inhibitors [DG:DG01601]	0.948
p6m	A	A10BJ	1164	7	2289	18	-0.8825	0.4137	0.156827	1.09154	0.075	0	A10BJ Glucagon-like peptide-1 receptor (GLP-1) analogues	0.237
p6m	A	A10BJ	1156	15	2282	25	-0.6535	0.5202	0.246773	1.09675	0.086	0	A10BJ Glucagon-like peptide-1 receptor (GLP-1) analogues	0.342
p6m	A	A10BJ	1164	7	2291	16	-0.6965	0.4983	0.18448	1.34621	0.17	0	A10BJ Glucagon-like peptide-1 receptor (GLP-1) analogues	0.35
p6m	A	A10BJ	1162	9	2288	19	-0.6735	0.5099	0.210732	1.23382	0.14	0	A10BJ Glucagon-like peptide-1 receptor (GLP-1) analogues	0.388
p6m	C	A10BJ	1164	7	360899	1637	-0.8904	0.4105	0.192056	0.877336	0.022	1	A10BJ Glucagon-like peptide-1 receptor (GLP-1) analogues	0.0468
p6m	C	A10BJ	1162	9	360714	1822	-0.7404	0.4769	0.243052	0.935804	0.031	1	A10BJ Glucagon-like peptide-1 receptor (GLP-1) analogues	0.071
p6m	C	A10BJ	1164	7	361280	1256	-0.6177	0.5392	0.252048	1.15338	0.11	0	A10BJ Glucagon-like peptide-1 receptor (GLP-1) analogues	0.159
p6m	C	A10BJ	1156	15	360311	2225	-0.4268	0.6526	0.383188	1.11149	0.12	0	A10BJ Glucagon-like peptide-1 receptor (GLP-1) analogues	0.226
p6m	E	A10BJ	3450	28	360714	1822	-0.2939	0.7454	0.505069	1.09996	0.14	0	A10BJ Glucagon-like peptide-1 receptor (GLP-1) analogues	0.262
p6m	E	A10BJ	3453	25	360899	1637	-0.3008	0.7402	0.491159	1.11566	0.15	0	A10BJ Glucagon-like peptide-1 receptor (GLP-1) analogues	0.288
p6m	E	A10BJ	3438	40	360311	2225	-0.1299	0.8782	0.630136	1.22397	0.44	0	A10BJ Glucagon-like peptide-1 receptor (GLP-1) analogues	0.574
p6m	E	A10BJ	3455	23	361280	1256	-0.11	0.8958	0.584345	1.37333	0.61	0	A10BJ Glucagon-like peptide-1 receptor (GLP-1) analogues	0.668
p6m	F	A10BJ	3450	28	24493	185	-0.197	0.8212	0.539421	1.25004	0.36	0	A10BJ Glucagon-like peptide-1 receptor (GLP-1) analogues	0.614
p6m	F	A10BJ	3453	25	24517	161	-0.1806	0.8347	0.53566	1.3008	0.42	0	A10BJ Glucagon-like peptide-1 receptor (GLP-1) analogues	0.652
p6m	F	A10BJ	3455	23	24536	142	-0.1364	0.8725	0.549374	1.38568	0.56	0	A10BJ Glucagon-like peptide-1 receptor (GLP-1) analogues	0.83
p6m	F	A10BJ	3438	40	24442	236	-0.0498	0.9515	0.663179	1.36508	0.79	0	A10BJ Glucagon-like peptide-1 receptor (GLP-1) analogues	0.909
p6m	G	A10BJ	1164	7	24517	161	-0.7564	0.4694	0.215668	1.02147	0.057	0	A10BJ Glucagon-like peptide-1 receptor (GLP-1) analogues	0.237
p6m	G	A10BJ	1162	9	24493	185	-0.6459	0.5242	0.262501	1.04678	0.067	0	A10BJ Glucagon-like peptide-1 receptor (GLP-1) analogues	0.282
p6m	G	A10BJ	1164	7	24536	142	-0.6119	0.5423	0.248553	1.18318	0.12	0	A10BJ Glucagon-like peptide-1 receptor (GLP-1) analogues	0.302
p6m	G	A10BJ	1156	15	24442	236	-0.3792	0.6844	0.394715	1.18667	0.18	0	A10BJ Glucagon-like peptide-1 receptor (GLP-1) analogues	0.521
p6m	A	A10BK	1155	16	2275	32	-0.5085	0.6014	0.308602	1.17197	0.14	0	A10BK Sodium-glucose co-transporter 2 (SGLT2) inhibitors	0.327
p6m	A	A10BK	1153	18	2274	33	-0.4243	0.6542	0.343551	1.24589	0.2	0	A10BK Sodium-glucose co-transporter 2 (SGLT2) inhibitors	0.405
p6m	A	A10BK	1146	25	2269	38	-0.2951	0.7445	0.417818	1.32641	0.32	0	A10BK Sodium-glucose co-transporter 2 (SGLT2) inhibitors	0.536
p6m	A	A10BK	1141	30	2265	42	-0.2141	0.8073	0.469601	1.3878	0.44	0	A10BK Sodium-glucose co-transporter 2 (SGLT2) inhibitors	0.666
p6m	C	A10BK	1153	18	359145	3391	-0.4053	0.6668	0.410769	1.08242	0.1	0	A10BK Sodium-glucose co-transporter 2 (SGLT2) inhibitors	0.162
p6m	C	A10BK	1155	16	359983	2553	-0.2413	0.7856	0.470743	1.31108	0.36	0	A10BK Sodium-glucose co-transporter 2 (SGLT2) inhibitors	0.439
p6m	C	A10BK	1141	30	358059	4477	-0.1557	0.8558	0.581138	1.26021	0.43	0	A10BK Sodium-glucose co-transporter 2 (SGLT2) inhibitors	0.565
p6m	C	A10BK	1146	25	358751	3785	-0.156	0.8556	0.563091	1.29998	0.47	0	A10BK Sodium-glucose co-transporter 2 (SGLT2) inhibitors	0.587
p6m	E	A10BK	3427	51	359145	3391	-0.1608	0.8514	0.635135	1.14143	0.28	0	A10BK Sodium-glucose co-transporter 2 (SGLT2) inhibitors	0.441
p6m	E	A10BK	3406	72	358059	4477	-0.0791	0.924	0.717284	1.19018	0.54	0	A10BK Sodium-glucose co-transporter 2 (SGLT2) inhibitors	0.664
p6m	E	A10BK	3430	48	359983	2553	0.0739	1.0767	0.796135	1.45606	0.63	0	A10BK Sodium-glucose co-transporter 2 (SGLT2) inhibitors	0.686
p6m	E	A10BK	3415	63	358751	3785	-0.0393	0.9614	0.735833	1.2562	0.77	0	A10BK Sodium-glucose co-transporter 2 (SGLT2) inhibitors	0.892
p6m	F	A10BK	3415	63	24364	314	0.1525	1.1647	0.867588	1.56367	0.31	0	A10BK Sodium-glucose co-transporter 2 (SGLT2) inhibitors	0.555
p6m	F	A10BK	3430	48	24451	227	0.1728	1.1887	0.850947	1.66039	0.31	0	A10BK Sodium-glucose co-transporter 2 (SGLT2) inhibitors	0.65
p6m	F	A10BK	3406	72	24287	391	0.0774	1.0805	0.819272	1.42495	0.58	0	A10BK Sodium-glucose co-transporter 2 (SGLT2) inhibitors	0.778
p6m	F	A10BK	3427	51	24404	274	0.034	1.0345	0.750334	1.42638	0.84	0	A10BK Sodium-glucose co-transporter 2 (SGLT2) inhibitors	0.913
p6m	G	A10BK	1153	18	24404	274	-0.2383	0.788	0.477191	1.30115	0.35	0	A10BK Sodium-glucose co-transporter 2 (SGLT2) inhibitors	0.6
p6m	G	A10BK	1155	16	24451	227	-0.1689	0.8446	0.496378	1.43697	0.53	0	A10BK Sodium-glucose co-transporter 2 (SGLT2) inhibitors	0.7
p6m	G	A10BK	1141	30	24287	391	-0.0473	0.9538	0.637587	1.42675	0.82	0	A10BK Sodium-glucose co-transporter 2 (SGLT2) inhibitors	0.927
p6m	G	A10BK	1146	25	24364	314	-0.0113	0.9888	0.639693	1.52831	0.96	0	A10BK Sodium-glucose co-transporter 2 (SGLT2) inhibitors	0.974
p6m	C	A11BA	1166	5	362106	430	0.1932	1.2132	0.491955	2.9917	0.68	0	A11BA Multivitamins, plain	0.791
p6m	E	A11BA	3473	5	362106	430	-0.4196	0.6573	0.269168	1.60503	0.36	0	A11BA Multivitamins, plain	0.502
p6m	F	A11BA	3473	5	24620	58	-0.5406	0.5824	0.230505	1.47135	0.25	0	A11BA Multivitamins, plain	0.478
p6m	G	A11BA	1166	5	24620	58	0.1188	1.1261	0.441896	2.86967	0.8	0	A11BA Multivitamins, plain	0.924
p6m	A	A11CC	1105	66	2245	62	0.2913	1.3382	0.907253	1.97394	0.14	0	A11CC Vitamin D and analogues	0.338
p6m	A	A11CC	1130	41	2273	34	0.3521	1.4221	0.859327	2.35343	0.17	0	A11CC Vitamin D and analogues	0.35
p6m	A	A11CC	1086	85	2203	104	0.1468	1.1581	0.835104	1.60607	0.38	0	A11CC Vitamin D and analogues	0.59
p6m	A	A11CC	1022	149	2110	197	0.0954	1.1	0.855788	1.41401	0.46	0	A11CC Vitamin D and analogues	0.674
p6m	B	A11CC	115	32	3017	314	0.7844	2.1911	1.37853	3.48266	0.00091	-1	A11CC Vitamin D and analogues	0.0226
p6m	B	A11CC	127	20	3162	169	0.7877	2.1982	1.24141	3.89253	0.0069	-1	A11CC Vitamin D and analogues	0.0531
p6m	B	A11CC	134	13	3216	115	0.3615	1.4354	0.726566	2.8359	0.3	0	A11CC Vitamin D and analogues	0.47
p6m	B	A11CC	139	8	3264	67	0.3305	1.3917	0.600935	3.22314	0.44	0	A11CC Vitamin D and analogues	0.574
p6m	C	A11CC	1130	41	359204	3332	0.7605	2.1393	1.54095	2.97038	5.6e-06	-1	A11CC Vitamin D and analogues	1.94e-05
p6m	C	A11CC	1105	66	355167	7369	0.5651	1.7596	1.35777	2.28052	1.9e-05	-1	A11CC Vitamin D and analogues	8.37e-05
p6m	C	A11CC	1022	149	338385	24151	0.2876	1.3332	1.11131	1.59939	0.002	-1	A11CC Vitamin D and analogues	0.00759
p6m	C	A11CC	1086	85	350384	12152	0.3507	1.4201	1.1278	1.78814	0.0029	-1	A11CC Vitamin D and analogues	0.0101
p6m	D	A11CC	115	32	338385	24151	1.0015	2.7223	1.80385	4.10853	1.9e-06	-1	A11CC Vitamin D and analogues	2.14e-05
p6m	D	A11CC	127	20	350384	12152	1.0335	2.8109	1.71296	4.61254	4.3e-05	-1	A11CC Vitamin D and analogues	0.000215
p6m	D	A11CC	134	13	355167	7369	0.9593	2.6099	1.43712	4.73959	0.0016	-1	A11CC Vitamin D and analogues	0.00445
p6m	D	A11CC	139	8	359204	3332	1.0411	2.8324	1.32989	6.0325	0.0069	-1	A11CC Vitamin D and analogues	0.0142
p6m	E	A11CC	3403	75	359204	3332	0.6088	1.8383	1.44732	2.33492	6e-07	-1	A11CC Vitamin D and analogues	2.46e-06
p6m	E	A11CC	3350	128	355167	7369	0.3887	1.4751	1.22832	1.77147	3.2e-05	-1	A11CC Vitamin D and analogues	0.000189
p6m	E	A11CC	3289	189	350384	12152	0.2847	1.3294	1.14154	1.54818	0.00025	-1	A11CC Vitamin D and analogues	0.00132
p6m	E	A11CC	3132	346	338385	24151	0.2125	1.2367	1.10001	1.3904	0.00038	-1	A11CC Vitamin D and analogues	0.00211
p6m	F	A11CC	3132	346	22149	2529	-0.0547	0.9468	0.835209	1.07325	0.39	0	A11CC Vitamin D and analogues	0.624
p6m	F	A11CC	3289	189	23247	1431	-0.0463	0.9548	0.811414	1.12349	0.58	0	A11CC Vitamin D and analogues	0.795
p6m	F	A11CC	3403	75	24064	614	-0.067	0.9352	0.727591	1.20202	0.6	0	A11CC Vitamin D and analogues	0.832
p6m	F	A11CC	3350	128	23733	945	0.0053	1.0054	0.826599	1.22276	0.96	0	A11CC Vitamin D and analogues	0.974
p6m	G	A11CC	1105	66	23733	945	0.1803	1.1975	0.916495	1.56476	0.19	0	A11CC Vitamin D and analogues	0.445
p6m	G	A11CC	1130	41	24064	614	0.1244	1.1325	0.810435	1.58261	0.47	0	A11CC Vitamin D and analogues	0.656
p6m	G	A11CC	1022	149	22149	2529	0.0231	1.0234	0.849384	1.23297	0.81	0	A11CC Vitamin D and analogues	0.924
p6m	G	A11CC	1086	85	23247	1431	0.017	1.0171	0.802995	1.28841	0.89	0	A11CC Vitamin D and analogues	0.945
p6m	H	A11CC	115	32	22149	2529	0.6744	1.9629	1.29236	2.98137	0.0016	-1	A11CC Vitamin D and analogues	0.018
p6m	H	A11CC	127	20	23247	1431	0.6393	1.8952	1.14717	3.13111	0.013	-1	A11CC Vitamin D and analogues	0.052
p6m	H	A11CC	134	13	23733	945	0.5256	1.6914	0.923625	3.09754	0.089	0	A11CC Vitamin D and analogues	0.191
p6m	H	A11CC	139	8	24064	614	0.4685	1.5976	0.754271	3.38378	0.22	0	A11CC Vitamin D and analogues	0.365
p6m	A	A11DA	1134	37	2298	9	1.6867	5.4015	2.49842	11.678	1.8e-05	-1	A11DA Vitamin B1, plain	0.000491
p6m	A	A11DA	1137	34	2302	5	2.0962	8.1353	3.07413	21.5289	2.4e-05	-1	A11DA Vitamin B1, plain	0.000656
p6m	A	A11DA	1130	41	2296	11	1.5752	4.8316	2.3885	9.77363	1.2e-05	-1	A11DA Vitamin B1, plain	0.00136
p6m	A	A11DA	1143	28	2302	5	1.8797	6.5516	2.43203	17.6491	0.0002	-1	A11DA Vitamin B1, plain	0.00215
p6m	B	A11DA	139	8	3306	25	1.0768	2.9353	1.18001	7.30139	0.021	-1	A11DA Vitamin B1, plain	0.0647
p6m	B	A11DA	138	9	3301	30	1.1328	3.1043	1.30791	7.3682	0.01	-1	A11DA Vitamin B1, plain	0.0677
p6m	B	A11DA	136	11	3290	41	1.045	2.8434	1.31477	6.14949	0.0079	-1	A11DA Vitamin B1, plain	0.0816
p6m	B	A11DA	138	9	3294	37	0.9917	2.6957	1.1662	6.23121	0.02	-1	A11DA Vitamin B1, plain	0.111
p6m	C	A11DA	1134	37	360871	1665	1.3115	3.7119	2.61549	5.26781	2.1e-13	-1	A11DA Vitamin B1, plain	4.81e-12
p6m	C	A11DA	1137	34	361117	1419	1.3498	3.8566	2.67813	5.55353	4e-13	-1	A11DA Vitamin B1, plain	4.93e-12
p6m	C	A11DA	1130	41	360375	2161	1.1941	3.3007	2.36817	4.60038	1.8e-12	-1	A11DA Vitamin B1, plain	4.37e-11
p6m	C	A11DA	1143	28	361510	1026	1.3947	4.0339	2.69872	6.02974	1e-11	-1	A11DA Vitamin B1, plain	6.92e-11
p6m	D	A11DA	139	8	361510	1026	2.1257	8.3789	3.84771	18.2463	8.6e-08	-1	A11DA Vitamin B1, plain	3.16e-07
p6m	D	A11DA	138	9	361117	1419	2.0072	7.4422	3.57822	15.4786	7.8e-08	-1	A11DA Vitamin B1, plain	6.94e-07
p6m	D	A11DA	136	11	360375	2161	1.8507	6.3644	3.26592	12.4025	5.4e-08	-1	A11DA Vitamin B1, plain	8.37e-07
p6m	D	A11DA	138	9	360871	1665	1.8711	6.4953	3.13615	13.4524	4.7e-07	-1	A11DA Vitamin B1, plain	4.27e-06
p6m	E	A11DA	3432	46	360871	1665	0.6762	1.9665	1.44839	2.66983	1.5e-05	-1	A11DA Vitamin B1, plain	9.83e-05
p6m	E	A11DA	3445	33	361510	1026	0.7561	2.1299	1.48261	3.05971	4.3e-05	-1	A11DA Vitamin B1, plain	0.000151
p6m	E	A11DA	3439	39	361117	1419	0.6439	1.904	1.36689	2.65211	0.00014	-1	A11DA Vitamin B1, plain	0.0007
p6m	E	A11DA	3426	52	360375	2161	0.5461	1.7266	1.29586	2.30049	0.00019	-1	A11DA Vitamin B1, plain	0.00114
p6m	F	A11DA	3426	52	24272	406	-0.1097	0.8961	0.662377	1.21232	0.48	0	A11DA Vitamin B1, plain	0.697
p6m	F	A11DA	3432	46	24352	326	0.0142	1.0143	0.734655	1.40038	0.93	0	A11DA Vitamin B1, plain	0.961
p6m	F	A11DA	3439	39	24396	282	0.0036	1.0036	0.707954	1.4227	0.98	0	A11DA Vitamin B1, plain	0.98
p6m	F	A11DA	3445	33	24435	243	0.0049	1.0049	0.688044	1.46777	0.98	0	A11DA Vitamin B1, plain	0.995
p6m	G	A11DA	1137	34	24396	282	0.7899	2.2031	1.51209	3.20992	3.9e-05	-1	A11DA Vitamin B1, plain	0.000802
p6m	G	A11DA	1134	37	24352	326	0.7267	2.0682	1.44248	2.96535	7.7e-05	-1	A11DA Vitamin B1, plain	0.00198
p6m	G	A11DA	1143	28	24435	243	0.7186	2.0515	1.35868	3.09749	0.00063	-1	A11DA Vitamin B1, plain	0.00615
p6m	G	A11DA	1130	41	24272	406	0.612	1.8441	1.31049	2.59504	0.00045	-1	A11DA Vitamin B1, plain	0.00911
p6m	H	A11DA	138	9	24396	282	1.5938	4.9224	2.38237	10.1707	1.7e-05	-1	A11DA Vitamin B1, plain	0.000252
p6m	H	A11DA	139	8	24435	243	1.5638	4.7769	2.22369	10.2617	6.1e-05	-1	A11DA Vitamin B1, plain	0.00034
p6m	H	A11DA	136	11	24272	406	1.3851	3.9954	2.05762	7.75802	4.3e-05	-1	A11DA Vitamin B1, plain	0.000666
p6m	H	A11DA	138	9	24352	326	1.3938	4.0302	1.95053	8.3271	0.00017	-1	A11DA Vitamin B1, plain	0.00189
p6m	A	A11EX	1152	19	2299	8	1.096	2.9922	1.22774	7.29031	0.016	-1	A11EX Vitamin B-complex, other combinations	0.14
p6m	A	A11EX	1159	12	2302	5	1.165	3.2059	1.02855	9.99122	0.045	-1	A11EX Vitamin B-complex, other combinations	0.21
p6m	B	A11EX	142	5	3309	22	1.2712	3.5652	1.16203	10.938	0.026	-1	A11EX Vitamin B-complex, other combinations	0.161
p6m	C	A11EX	1152	19	360667	1869	0.364	1.439	0.897658	2.30693	0.13	0	A11EX Vitamin B-complex, other combinations	0.238
p6m	C	A11EX	1159	12	361434	1102	0.3321	1.3939	0.769891	2.52351	0.27	0	A11EX Vitamin B-complex, other combinations	0.389
p6m	C	A11EX	1162	9	361734	802	0.3028	1.3537	0.682771	2.68373	0.39	0	A11EX Vitamin B-complex, other combinations	0.527
p6m	C	A11EX	1166	5	362012	524	0.0905	1.0947	0.441355	2.71535	0.84	0	A11EX Vitamin B-complex, other combinations	0.855
p6m	D	A11EX	142	5	360667	1869	0.9054	2.4728	0.950936	6.43034	0.063	0	A11EX Vitamin B-complex, other combinations	0.175
p6m	E	A11EX	3471	7	362012	524	-0.2127	0.8084	0.377029	1.73329	0.58	0	A11EX Vitamin B-complex, other combinations	0.638
p6m	E	A11EX	3467	11	361734	802	-0.1505	0.8603	0.467976	1.58159	0.63	0	A11EX Vitamin B-complex, other combinations	0.779
p6m	E	A11EX	3451	27	360667	1869	-0.019	0.9812	0.66459	1.44858	0.92	0	A11EX Vitamin B-complex, other combinations	0.943
p6m	E	A11EX	3461	17	361434	1102	0.0105	1.0106	0.618351	1.65158	0.97	0	A11EX Vitamin B-complex, other combinations	0.974
p6m	F	A11EX	3451	27	24361	317	-0.5151	0.5975	0.399493	0.893519	0.012	1	A11EX Vitamin B-complex, other combinations	0.0809
p6m	F	A11EX	3467	11	24516	162	-0.7243	0.4847	0.260751	0.900834	0.022	1	A11EX Vitamin B-complex, other combinations	0.141
p6m	F	A11EX	3471	7	24559	119	-0.8518	0.4267	0.197163	0.923276	0.031	1	A11EX Vitamin B-complex, other combinations	0.185
p6m	F	A11EX	3461	17	24474	204	-0.5001	0.6064	0.366296	1.00403	0.052	0	A11EX Vitamin B-complex, other combinations	0.206
p6m	G	A11EX	1166	5	24559	119	-0.3448	0.7083	0.285731	1.75599	0.46	0	A11EX Vitamin B-complex, other combinations	0.653
p6m	G	A11EX	1162	9	24516	162	-0.0537	0.9477	0.477793	1.87969	0.88	0	A11EX Vitamin B-complex, other combinations	0.946
p6m	G	A11EX	1152	19	24361	317	-0.011	0.989	0.614128	1.5928	0.96	0	A11EX Vitamin B-complex, other combinations	0.968
p6m	G	A11EX	1159	12	24474	204	0.0074	1.0074	0.555356	1.82734	0.98	0	A11EX Vitamin B-complex, other combinations	0.99
p6m	H	A11EX	142	5	24361	317	0.7108	2.0356	0.796396	5.20282	0.14	0	A11EX Vitamin B-complex, other combinations	0.445
p6m	E	A11GA	3473	5	362377	159	0.8678	2.3817	0.965234	5.87663	0.06	0	A11GA Ascorbic acid (vitamin C), plain	0.144
p6m	F	A11GA	3473	5	24653	25	0.5114	1.6676	0.617658	4.50255	0.31	0	A11GA Ascorbic acid (vitamin C), plain	0.542
p6m	E	A11JC	3473	5	362036	500	-0.5903	0.5541	0.22754	1.34951	0.19	0	A11JC Vitamins, other combinations	0.33
p6m	F	A11JC	3473	5	24603	75	-0.9605	0.3827	0.153002	0.95732	0.04	1	A11JC Vitamins, other combinations	0.195
p6m	A	A12AA	1154	17	2294	13	0.4869	1.6272	0.746832	3.54533	0.22	0	A12AA Calcium	0.494
p6m	A	A12AA	1163	8	2297	10	-0.0764	0.9265	0.348067	2.466	0.88	0	A12AA Calcium	0.934
p6m	A	A12AA	1164	7	2299	8	0.0135	1.0136	0.347922	2.95262	0.98	0	A12AA Calcium	0.99
p6m	B	A12AA	142	5	3306	25	1.4617	4.3134	1.42192	13.085	0.0098	-1	A12AA Calcium	0.0868
p6m	C	A12AA	1154	17	361084	1452	0.9471	2.5782	1.57782	4.21289	0.00016	-1	A12AA Calcium	0.000845
p6m	C	A12AA	1164	7	361859	677	0.767	2.1532	1.00926	4.59374	0.047	-1	A12AA Calcium	0.0852
p6m	C	A12AA	1163	8	361660	876	0.6448	1.9055	0.939069	3.86665	0.074	0	A12AA Calcium	0.139
p6m	D	A12AA	142	5	361084	1452	1.6529	5.2219	2.04967	13.3038	0.00053	-1	A12AA Calcium	0.00329
p6m	E	A12AA	3448	30	361084	1452	0.6807	1.9753	1.36739	2.85348	0.00029	-1	A12AA Calcium	0.00171
p6m	E	A12AA	3463	15	361859	677	0.7424	2.101	1.25171	3.52657	0.005	-1	A12AA Calcium	0.0179
p6m	E	A12AA	3460	18	361660	876	0.6603	1.9354	1.20655	3.10468	0.0062	-1	A12AA Calcium	0.0241
p6m	E	A12AA	3470	8	362098	438	0.5595	1.7498	0.864867	3.5401	0.12	0	A12AA Calcium	0.176
p6m	F	A12AA	3448	30	24478	200	0.2224	1.249	0.842443	1.85189	0.27	0	A12AA Calcium	0.496
p6m	F	A12AA	3460	18	24556	122	0.1861	1.2046	0.725815	1.99913	0.47	0	A12AA Calcium	0.692
p6m	F	A12AA	3463	15	24581	97	0.2074	1.2304	0.70484	2.14799	0.47	0	A12AA Calcium	0.696
p6m	F	A12AA	3470	8	24610	68	-0.1012	0.9038	0.428136	1.90786	0.79	0	A12AA Calcium	0.905
p6m	G	A12AA	1154	17	24478	200	0.5046	1.6564	0.996924	2.75206	0.051	0	A12AA Calcium	0.318
p6m	G	A12AA	1164	7	24581	97	0.2158	1.2409	0.566436	2.71844	0.59	0	A12AA Calcium	0.791
p6m	G	A12AA	1163	8	24556	122	0.1746	1.1908	0.573854	2.47112	0.64	0	A12AA Calcium	0.845
p6m	H	A12AA	142	5	24478	200	1.2367	3.4443	1.31767	9.00343	0.012	-1	A12AA Calcium	0.0875
p6m	A	A12AX	1038	133	2186	121	0.428	1.5341	1.15879	2.03102	0.0028	-1	A12AX Calcium, combinations with vitamin D and/or other drugs	0.0187
p6m	A	A12AX	1017	154	2151	156	0.3338	1.3963	1.07785	1.80882	0.011	-1	A12AX Calcium, combinations with vitamin D and/or other drugs	0.0622
p6m	A	A12AX	932	239	2038	269	0.2847	1.3294	1.07101	1.65006	0.0098	-1	A12AX Calcium, combinations with vitamin D and/or other drugs	0.114
p6m	A	A12AX	994	177	2110	197	0.259	1.2956	1.01824	1.64846	0.035	-1	A12AX Calcium, combinations with vitamin D and/or other drugs	0.176
p6m	B	A12AX	105	42	2865	466	0.4326	1.5412	1.01103	2.34954	0.044	-1	A12AX Calcium, combinations with vitamin D and/or other drugs	0.218
p6m	B	A12AX	116	31	2988	343	0.3464	1.4139	0.896791	2.22919	0.14	0	A12AX Calcium, combinations with vitamin D and/or other drugs	0.341
p6m	B	A12AX	122	25	3046	285	0.2564	1.2923	0.789962	2.11402	0.31	0	A12AX Calcium, combinations with vitamin D and/or other drugs	0.47
p6m	B	A12AX	127	20	3097	234	0.1624	1.1763	0.688519	2.00975	0.55	0	A12AX Calcium, combinations with vitamin D and/or other drugs	0.672
p6m	C	A12AX	1038	133	340509	22027	0.4905	1.6332	1.35061	1.97482	4.2e-07	-1	A12AX Calcium, combinations with vitamin D and/or other drugs	1.7e-06
p6m	C	A12AX	932	239	314832	47704	0.3518	1.4216	1.22044	1.65597	6.2e-06	-1	A12AX Calcium, combinations with vitamin D and/or other drugs	5.02e-05
p6m	C	A12AX	994	177	325977	36559	0.2859	1.331	1.12315	1.5773	0.00097	-1	A12AX Calcium, combinations with vitamin D and/or other drugs	0.0037
p6m	C	A12AX	1017	154	331005	31531	0.29	1.3364	1.11733	1.59844	0.0015	-1	A12AX Calcium, combinations with vitamin D and/or other drugs	0.0044
p6m	D	A12AX	105	42	314832	47704	0.5682	1.7651	1.19974	2.59679	0.0039	-1	A12AX Calcium, combinations with vitamin D and/or other drugs	0.0173
p6m	D	A12AX	116	31	325977	36559	0.4444	1.5596	1.02295	2.37778	0.039	-1	A12AX Calcium, combinations with vitamin D and/or other drugs	0.0813
p6m	D	A12AX	127	20	340509	22027	0.4291	1.5358	0.938429	2.51353	0.088	0	A12AX Calcium, combinations with vitamin D and/or other drugs	0.122
p6m	D	A12AX	122	25	331005	31531	0.3518	1.4216	0.904068	2.23537	0.13	0	A12AX Calcium, combinations with vitamin D and/or other drugs	0.218
p6m	E	A12AX	3224	254	340509	22027	0.2511	1.2854	1.12474	1.46901	0.00023	-1	A12AX Calcium, combinations with vitamin D and/or other drugs	0.000687
p6m	E	A12AX	2970	508	314832	47704	0.165	1.1794	1.06678	1.30389	0.0013	-1	A12AX Calcium, combinations with vitamin D and/or other drugs	0.00603
p6m	E	A12AX	3104	374	325977	36559	0.131	1.14	1.01788	1.27673	0.023	-1	A12AX Calcium, combinations with vitamin D and/or other drugs	0.0674
p6m	E	A12AX	3168	310	331005	31531	0.0885	1.0926	0.966655	1.23485	0.16	0	A12AX Calcium, combinations with vitamin D and/or other drugs	0.303
p6m	F	A12AX	3168	310	21628	3050	-0.1121	0.8939	0.786273	1.01635	0.087	0	A12AX Calcium, combinations with vitamin D and/or other drugs	0.288
p6m	F	A12AX	3224	254	22109	2569	-0.1258	0.8818	0.766938	1.01389	0.077	0	A12AX Calcium, combinations with vitamin D and/or other drugs	0.345
p6m	F	A12AX	3104	374	21169	3509	-0.0724	0.9302	0.825888	1.04759	0.23	0	A12AX Calcium, combinations with vitamin D and/or other drugs	0.481
p6m	F	A12AX	2970	508	20142	4536	-0.0581	0.9436	0.848944	1.04872	0.28	0	A12AX Calcium, combinations with vitamin D and/or other drugs	0.508
p6m	G	A12AX	1038	133	22109	2569	0.1261	1.1344	0.935608	1.37553	0.2	0	A12AX Calcium, combinations with vitamin D and/or other drugs	0.405
p6m	G	A12AX	932	239	20142	4536	0.1294	1.1382	0.975411	1.3281	0.1	0	A12AX Calcium, combinations with vitamin D and/or other drugs	0.419
p6m	G	A12AX	1017	154	21628	3050	0.0933	1.0978	0.915439	1.31659	0.31	0	A12AX Calcium, combinations with vitamin D and/or other drugs	0.562
p6m	G	A12AX	994	177	21169	3509	0.0857	1.0895	0.917462	1.29384	0.33	0	A12AX Calcium, combinations with vitamin D and/or other drugs	0.635
p6m	H	A12AX	105	42	20142	4536	0.4053	1.4998	1.02322	2.19837	0.038	-1	A12AX Calcium, combinations with vitamin D and/or other drugs	0.196
p6m	H	A12AX	116	31	21169	3509	0.317	1.373	0.903777	2.08591	0.14	0	A12AX Calcium, combinations with vitamin D and/or other drugs	0.341
p6m	H	A12AX	122	25	21628	3050	0.2236	1.2505	0.795385	1.96607	0.33	0	A12AX Calcium, combinations with vitamin D and/or other drugs	0.466
p6m	H	A12AX	127	20	22109	2569	0.1445	1.1555	0.706544	1.88972	0.56	0	A12AX Calcium, combinations with vitamin D and/or other drugs	0.652
p6m	A	A12BA	1160	11	2298	9	0.4155	1.5151	0.598095	3.83793	0.38	0	A12BA Potassium	0.623
p6m	C	A12BA	1160	11	361270	1266	0.5779	1.7823	0.972172	3.26755	0.062	0	A12BA Potassium	0.138
p6m	E	A12BA	3471	7	362247	289	0.7506	2.1184	0.992752	4.52025	0.052	0	A12BA Potassium	0.119
p6m	E	A12BA	3458	20	361270	1266	0.3852	1.4699	0.939526	2.29956	0.092	0	A12BA Potassium	0.196
p6m	E	A12BA	3468	10	361955	581	0.4612	1.5861	0.843858	2.98103	0.15	0	A12BA Potassium	0.279
p6m	F	A12BA	3468	10	24574	104	-0.271	0.7626	0.394187	1.47534	0.42	0	A12BA Potassium	0.662
p6m	F	A12BA	3458	20	24485	193	-0.1691	0.8445	0.527885	1.35091	0.48	0	A12BA Potassium	0.697
p6m	F	A12BA	3471	7	24613	65	-0.1964	0.8216	0.37147	1.81738	0.63	0	A12BA Potassium	0.796
p6m	G	A12BA	1160	11	24485	193	0.0559	1.0575	0.569054	1.96502	0.86	0	A12BA Potassium	0.94
p6m	C	A12CC	1166	5	362240	296	0.6967	2.0071	0.807164	4.99086	0.13	0	A12CC Magnesium	0.238
p6m	E	A12CC	3472	6	362240	296	0.3298	1.3907	0.609772	3.17186	0.43	0	A12CC Magnesium	0.563
p6m	F	A12CC	3472	6	24611	67	-0.2191	0.8032	0.343573	1.87775	0.61	0	A12CC Magnesium	0.81
p6m	G	A12CC	1166	5	24611	67	0.2771	1.3193	0.524557	3.3183	0.56	0	A12CC Magnesium	0.82
p6m	A	B01AA	1108	63	2262	45	0.3247	1.3837	0.90846	2.10741	0.13	0	B01AA Vitamin K antagonists	0.388
p6m	A	B01AA	1136	35	2279	28	0.3531	1.4235	0.83426	2.42904	0.2	0	B01AA Vitamin K antagonists	0.405
p6m	A	B01AA	1129	42	2273	34	0.296	1.3445	0.823571	2.19498	0.24	0	B01AA Vitamin K antagonists	0.468
p6m	A	B01AA	1143	28	2283	24	0.2507	1.2849	0.715154	2.30883	0.4	0	B01AA Vitamin K antagonists	0.554
p6m	B	B01AA	132	15	3238	93	0.4835	1.6217	0.851766	3.08753	0.14	0	B01AA Vitamin K antagonists	0.496
p6m	B	B01AA	140	7	3262	69	0.01	1.0101	0.42308	2.41152	0.98	0	B01AA Vitamin K antagonists	0.99
p6m	C	B01AA	1108	63	353404	9132	0.2243	1.2514	0.959935	1.63149	0.097	0	B01AA Vitamin K antagonists	0.187
p6m	C	B01AA	1143	28	358702	3834	0.2664	1.3053	0.888351	1.91797	0.17	0	B01AA Vitamin K antagonists	0.228
p6m	C	B01AA	1129	42	355815	6721	0.1341	1.1436	0.832722	1.57041	0.41	0	B01AA Vitamin K antagonists	0.525
p6m	C	B01AA	1136	35	356643	5893	0.0809	1.0842	0.767627	1.53138	0.65	0	B01AA Vitamin K antagonists	0.766
p6m	D	B01AA	132	15	353404	9132	0.3706	1.4487	0.829735	2.52927	0.19	0	B01AA Vitamin K antagonists	0.386
p6m	D	B01AA	140	7	355815	6721	-0.0692	0.9331	0.430473	2.02278	0.86	0	B01AA Vitamin K antagonists	0.915
p6m	E	B01AA	3426	52	358702	3834	0.2298	1.2584	0.950082	1.66666	0.11	0	B01AA Vitamin K antagonists	0.164
p6m	E	B01AA	3370	108	353404	9132	0.101	1.1062	0.906576	1.34989	0.32	0	B01AA Vitamin K antagonists	0.462
p6m	E	B01AA	3402	76	355815	6721	0.0683	1.0706	0.847395	1.35272	0.57	0	B01AA Vitamin K antagonists	0.728
p6m	E	B01AA	3415	63	356643	5893	0.0105	1.0106	0.782693	1.30476	0.94	0	B01AA Vitamin K antagonists	0.97
p6m	F	B01AA	3370	108	23530	1148	-0.1962	0.8218	0.667452	1.01193	0.065	0	B01AA Vitamin K antagonists	0.245
p6m	F	B01AA	3415	63	23989	689	-0.2283	0.7959	0.609129	1.03988	0.094	0	B01AA Vitamin K antagonists	0.293
p6m	F	B01AA	3402	76	23866	812	-0.1986	0.8199	0.641892	1.04725	0.11	0	B01AA Vitamin K antagonists	0.326
p6m	F	B01AA	3426	52	24103	575	-0.2545	0.7753	0.578258	1.03944	0.089	0	B01AA Vitamin K antagonists	0.351
p6m	G	B01AA	1143	28	24103	575	-0.172	0.842	0.568258	1.2476	0.39	0	B01AA Vitamin K antagonists	0.589
p6m	G	B01AA	1136	35	23989	689	-0.12	0.8869	0.622654	1.26326	0.51	0	B01AA Vitamin K antagonists	0.699
p6m	G	B01AA	1129	42	23866	812	-0.1018	0.9032	0.652672	1.24996	0.54	0	B01AA Vitamin K antagonists	0.836
p6m	G	B01AA	1108	63	23530	1148	-0.0518	0.9496	0.723808	1.24572	0.71	0	B01AA Vitamin K antagonists	0.913
p6m	H	B01AA	140	7	23866	812	-0.2485	0.7799	0.357853	1.69988	0.53	0	B01AA Vitamin K antagonists	0.726
p6m	H	B01AA	132	15	23530	1148	0.1483	1.1599	0.659822	2.03894	0.61	0	B01AA Vitamin K antagonists	0.818
p6m	A	B01AB	1153	18	2298	9	1.187	3.2772	1.41051	7.61505	0.0058	-1	B01AB Heparin group	0.0615
p6m	A	B01AB	1143	28	2287	20	0.7056	2.0251	1.0941	3.74833	0.025	-1	B01AB Heparin group	0.162
p6m	A	B01AB	1163	8	2301	6	0.5428	1.7208	0.573806	5.16115	0.33	0	B01AB Heparin group	0.531
p6m	C	B01AB	1164	7	362332	204	1.9606	7.1039	3.27555	15.4068	6.9e-07	-1	B01AB Heparin group	2.73e-06
p6m	C	B01AB	1153	18	361149	1387	1.1414	3.131	1.95091	5.0249	2.3e-06	-1	B01AB Heparin group	1.32e-05
p6m	C	B01AB	1143	28	359220	3316	0.6468	1.9094	1.3038	2.79635	0.00089	-1	B01AB Heparin group	0.00373
p6m	C	B01AB	1163	8	361883	653	1.0056	2.7334	1.34849	5.54077	0.0053	-1	B01AB Heparin group	0.0146
p6m	E	B01AB	3467	11	362332	204	1.5847	4.8781	2.62589	9.0619	5.3e-07	-1	B01AB Heparin group	2.22e-06
p6m	E	B01AB	3451	27	361149	1387	0.6686	1.9514	1.3281	2.8673	0.00066	-1	B01AB Heparin group	0.00322
p6m	E	B01AB	3464	14	361883	653	0.7201	2.0546	1.20354	3.50729	0.0083	-1	B01AB Heparin group	0.0271
p6m	E	B01AB	3430	48	359220	3316	0.3468	1.4146	1.05866	1.89019	0.019	-1	B01AB Heparin group	0.0578
p6m	F	B01AB	3430	48	24163	515	-0.3052	0.737	0.54449	0.997452	0.048	1	B01AB Heparin group	0.209
p6m	F	B01AB	3464	14	24496	182	-0.5322	0.5873	0.33861	1.01864	0.058	0	B01AB Heparin group	0.242
p6m	F	B01AB	3451	27	24397	281	-0.2627	0.769	0.514601	1.14906	0.2	0	B01AB Heparin group	0.461
p6m	F	B01AB	3467	11	24567	111	-0.3037	0.7381	0.393235	1.38545	0.34	0	B01AB Heparin group	0.67
p6m	G	B01AB	1153	18	24397	281	0.2645	1.3027	0.801987	2.11617	0.28	0	B01AB Heparin group	0.583
p6m	G	B01AB	1164	7	24567	111	0.2252	1.2526	0.577054	2.71893	0.57	0	B01AB Heparin group	0.728
p6m	G	B01AB	1163	8	24496	182	-0.1344	0.8743	0.427392	1.78839	0.71	0	B01AB Heparin group	0.87
p6m	G	B01AB	1143	28	24163	515	0.0508	1.0521	0.711946	1.55488	0.8	0	B01AB Heparin group	0.924
p6m	A	B01AC	959	212	2068	239	-0.1524	0.8586	0.675029	1.09219	0.21	0	B01AC Platelet aggregation inhibitors excl. heparin	0.405
p6m	A	B01AC	983	188	2100	207	-0.1219	0.8852	0.689199	1.13704	0.34	0	B01AC Platelet aggregation inhibitors excl. heparin	0.517
p6m	A	B01AC	934	237	2044	263	-0.1144	0.8919	0.707073	1.125	0.33	0	B01AC Platelet aggregation inhibitors excl. heparin	0.543
p6m	A	B01AC	872	299	1982	325	-0.0683	0.934	0.748991	1.16467	0.54	0	B01AC Platelet aggregation inhibitors excl. heparin	0.734
p6m	B	B01AC	111	36	2867	464	-0.2747	0.7598	0.483553	1.19383	0.23	0	B01AC Platelet aggregation inhibitors excl. heparin	0.479
p6m	B	B01AC	113	34	2914	417	-0.197	0.8212	0.519772	1.29749	0.4	0	B01AC Platelet aggregation inhibitors excl. heparin	0.55
p6m	B	B01AC	99	48	2755	576	-0.2095	0.811	0.529857	1.24117	0.34	0	B01AC Platelet aggregation inhibitors excl. heparin	0.715
p6m	B	B01AC	113	34	2970	361	0.0297	1.0302	0.653085	1.62496	0.9	0	B01AC Platelet aggregation inhibitors excl. heparin	0.936
p6m	C	B01AC	959	212	322231	40305	-0.1606	0.8516	0.713913	1.01582	0.074	0	B01AC Platelet aggregation inhibitors excl. heparin	0.127
p6m	C	B01AC	934	237	318388	44148	-0.1099	0.8959	0.754897	1.06326	0.21	0	B01AC Platelet aggregation inhibitors excl. heparin	0.333
p6m	C	B01AC	983	188	332780	29756	0.0989	1.104	0.923311	1.32001	0.28	0	B01AC Platelet aggregation inhibitors excl. heparin	0.352
p6m	C	B01AC	872	299	308711	53825	-0.0037	0.9963	0.846767	1.17229	0.96	0	B01AC Platelet aggregation inhibitors excl. heparin	0.972
p6m	D	B01AC	111	36	318388	44148	-0.3401	0.7117	0.465595	1.08781	0.12	0	B01AC Platelet aggregation inhibitors excl. heparin	0.2
p6m	D	B01AC	113	34	322231	40305	-0.2772	0.7579	0.493809	1.16319	0.2	0	B01AC Platelet aggregation inhibitors excl. heparin	0.287
p6m	D	B01AC	99	48	308711	53825	-0.1937	0.8239	0.551556	1.23065	0.34	0	B01AC Platelet aggregation inhibitors excl. heparin	0.529
p6m	D	B01AC	113	34	332780	29756	0.148	1.1596	0.760934	1.76702	0.49	0	B01AC Platelet aggregation inhibitors excl. heparin	0.562
p6m	E	B01AC	3083	395	332780	29756	0.1971	1.2178	1.07878	1.37484	0.0014	-1	B01AC Platelet aggregation inhibitors excl. heparin	0.00363
p6m	E	B01AC	2854	624	308711	53825	0.065	1.0672	0.958633	1.18799	0.23	0	B01AC Platelet aggregation inhibitors excl. heparin	0.372
p6m	E	B01AC	3027	451	322231	40305	-0.0326	0.9679	0.859861	1.08956	0.59	0	B01AC Platelet aggregation inhibitors excl. heparin	0.742
p6m	E	B01AC	2978	500	318388	44148	-0.0029	0.9971	0.889321	1.11802	0.96	0	B01AC Platelet aggregation inhibitors excl. heparin	0.968
p6m	F	B01AC	2978	500	20123	4555	-0.1122	0.8939	0.796383	1.00334	0.057	0	B01AC Platelet aggregation inhibitors excl. heparin	0.218
p6m	F	B01AC	2854	624	19075	5603	-0.0992	0.9055	0.811981	1.00985	0.074	0	B01AC Platelet aggregation inhibitors excl. heparin	0.255
p6m	F	B01AC	3027	451	20581	4097	-0.1065	0.899	0.79776	1.013	0.081	0	B01AC Platelet aggregation inhibitors excl. heparin	0.28
p6m	F	B01AC	3083	395	21076	3602	-0.1086	0.897	0.79182	1.01625	0.088	0	B01AC Platelet aggregation inhibitors excl. heparin	0.351
p6m	G	B01AC	959	212	20581	4097	-0.1528	0.8583	0.721852	1.02053	0.084	0	B01AC Platelet aggregation inhibitors excl. heparin	0.285
p6m	G	B01AC	983	188	21076	3602	-0.1453	0.8648	0.722751	1.03475	0.11	0	B01AC Platelet aggregation inhibitors excl. heparin	0.29
p6m	G	B01AC	934	237	20123	4555	-0.1432	0.8665	0.73266	1.0249	0.094	0	B01AC Platelet aggregation inhibitors excl. heparin	0.327
p6m	G	B01AC	872	299	19075	5603	-0.0983	0.9064	0.772869	1.06291	0.23	0	B01AC Platelet aggregation inhibitors excl. heparin	0.559
p6m	H	B01AC	111	36	20123	4555	-0.2722	0.7617	0.501791	1.15619	0.2	0	B01AC Platelet aggregation inhibitors excl. heparin	0.435
p6m	H	B01AC	113	34	20581	4097	-0.1662	0.8469	0.555276	1.29168	0.44	0	B01AC Platelet aggregation inhibitors excl. heparin	0.568
p6m	H	B01AC	99	48	19075	5603	-0.1832	0.8326	0.562731	1.23195	0.36	0	B01AC Platelet aggregation inhibitors excl. heparin	0.685
p6m	H	B01AC	113	34	21076	3602	0.0061	1.0061	0.660575	1.53229	0.98	0	B01AC Platelet aggregation inhibitors excl. heparin	0.98
p6m	E	B01AE	3464	14	361530	1006	0.3801	1.4624	0.858945	2.48992	0.16	0	B01AE Direct thrombin inhibitors	0.288
p6m	E	B01AE	3470	8	361960	576	0.4208	1.5232	0.754853	3.07354	0.24	0	B01AE Direct thrombin inhibitors	0.311
p6m	E	B01AE	3467	11	361742	794	0.3857	1.4707	0.807079	2.67992	0.21	0	B01AE Direct thrombin inhibitors	0.358
p6m	E	B01AE	3470	8	361809	727	0.1696	1.1848	0.587616	2.38904	0.64	0	B01AE Direct thrombin inhibitors	0.787
p6m	F	B01AE	3470	8	24579	99	-0.3191	0.7268	0.350182	1.50846	0.39	0	B01AE Direct thrombin inhibitors	0.631
p6m	F	B01AE	3470	8	24594	84	-0.1666	0.8465	0.405416	1.76766	0.66	0	B01AE Direct thrombin inhibitors	0.85
p6m	F	B01AE	3467	11	24567	111	-0.0969	0.9077	0.48383	1.70287	0.76	0	B01AE Direct thrombin inhibitors	0.868
p6m	F	B01AE	3464	14	24542	136	-0.056	0.9455	0.540671	1.65343	0.84	0	B01AE Direct thrombin inhibitors	0.94
p6m	A	B01AF	1072	99	2222	85	0.3382	1.4024	1.01658	1.93471	0.039	-1	B01AF Direct factor Xa inhibitors	0.14
p6m	A	B01AF	1069	102	2212	95	0.2787	1.3214	0.96799	1.80397	0.079	0	B01AF Direct factor Xa inhibitors	0.244
p6m	A	B01AF	1063	108	2205	102	0.2692	1.309	0.96744	1.77104	0.081	0	B01AF Direct factor Xa inhibitors	0.292
p6m	A	B01AF	1047	124	2189	118	0.2422	1.274	0.958763	1.69287	0.095	0	B01AF Direct factor Xa inhibitors	0.359
p6m	B	B01AF	126	21	3155	176	0.2814	1.325	0.78431	2.23851	0.29	0	B01AF Direct factor Xa inhibitors	0.47
p6m	B	B01AF	127	20	3167	164	0.2434	1.2756	0.746827	2.17881	0.37	0	B01AF Direct factor Xa inhibitors	0.548
p6m	B	B01AF	125	22	3143	188	0.2584	1.2949	0.773209	2.16858	0.33	0	B01AF Direct factor Xa inhibitors	0.6
p6m	B	B01AF	121	26	3115	216	0.2785	1.3212	0.814849	2.14221	0.26	0	B01AF Direct factor Xa inhibitors	0.632
p6m	C	B01AF	1072	99	350204	12332	0.5772	1.7811	1.43706	2.20742	1.4e-07	-1	B01AF Direct factor Xa inhibitors	6.46e-07
p6m	C	B01AF	1047	124	343761	18775	0.4043	1.4983	1.23352	1.81998	4.6e-05	-1	B01AF Direct factor Xa inhibitors	0.000279
p6m	C	B01AF	1069	102	346861	15675	0.3556	1.427	1.15498	1.76315	0.00098	-1	B01AF Direct factor Xa inhibitors	0.00318
p1yr	C	B01AF	1063	108	345706	16830	0.3501	1.4193	1.15475	1.7444	0.00088	-1	B01AF Direct factor Xa inhibitors	0.00342
p1yr	D	B01AF	127	20	350204	12332	0.5553	1.7425	1.07073	2.83586	0.025	-1	B01AF Direct factor Xa inhibitors	0.0398
p1yr	D	B01AF	121	26	343761	18775	0.4649	1.5918	1.02593	2.46983	0.038	-1	B01AF Direct factor Xa inhibitors	0.121
p1yr	D	B01AF	126	21	346861	15675	0.361	1.4348	0.890711	2.31123	0.14	0	B01AF Direct factor Xa inhibitors	0.223
p1yr	D	B01AF	125	22	345706	16830	0.3506	1.4199	0.888939	2.2679	0.14	0	B01AF Direct factor Xa inhibitors	0.23
p1yr	E	B01AF	3294	184	350204	12332	0.4753	1.6085	1.378	1.8776	1.7e-09	-1	B01AF Direct factor Xa inhibitors	1.08e-08
p1yr	E	B01AF	3236	242	343761	18775	0.3169	1.3729	1.19785	1.57348	5.2e-06	-1	B01AF Direct factor Xa inhibitors	4.46e-05
p1yr	E	B01AF	3281	197	346861	15675	0.2906	1.3372	1.15129	1.5532	0.00014	-1	B01AF Direct factor Xa inhibitors	0.0007
p1yr	E	B01AF	3268	210	345706	16830	0.2801	1.3233	1.14421	1.53033	0.00016	-1	B01AF Direct factor Xa inhibitors	0.000885
p1yr	F	B01AF	3268	210	22463	2215	-0.1736	0.8406	0.722571	0.977906	0.025	1	B01AF Direct factor Xa inhibitors	0.132
p1yr	F	B01AF	3281	197	22594	2084	-0.1717	0.8423	0.720789	0.984217	0.031	1	B01AF Direct factor Xa inhibitors	0.162
p1yr	F	B01AF	3236	242	22230	2448	-0.1341	0.8745	0.758466	1.00833	0.065	0	B01AF Direct factor Xa inhibitors	0.245
p1yr	F	B01AF	3294	184	22795	1883	-0.121	0.886	0.754218	1.04086	0.14	0	B01AF Direct factor Xa inhibitors	0.467
p1yr	G	B01AF	1069	102	22594	2084	-0.0487	0.9525	0.768376	1.18078	0.66	0	B01AF Direct factor Xa inhibitors	0.831
p1yr	G	B01AF	1063	108	22463	2215	-0.0504	0.9509	0.771125	1.17251	0.64	0	B01AF Direct factor Xa inhibitors	0.845
p1yr	G	B01AF	1072	99	22795	1883	0.0264	1.0268	0.825407	1.27721	0.81	0	B01AF Direct factor Xa inhibitors	0.896
p1yr	G	B01AF	1047	124	22230	2448	-0.0074	0.9926	0.814509	1.20974	0.94	0	B01AF Direct factor Xa inhibitors	0.966
p1yr	H	B01AF	127	20	22795	1883	0.1151	1.1219	0.687967	1.82965	0.65	0	B01AF Direct factor Xa inhibitors	0.714
p1yr	H	B01AF	121	26	22230	2448	0.1616	1.1754	0.756001	1.82743	0.47	0	B01AF Direct factor Xa inhibitors	0.732
p1yr	H	B01AF	126	21	22594	2084	0.0665	1.0688	0.662153	1.7252	0.79	0	B01AF Direct factor Xa inhibitors	0.837
p1yr	H	B01AF	125	22	22463	2215	0.0702	1.0727	0.670604	1.7158	0.77	0	B01AF Direct factor Xa inhibitors	0.885
p1yr	A	B02AA	1165	6	2288	19	0.4434	1.558	0.593315	4.09133	0.37	0	B02AA Amino acids	0.622
p1yr	C	B02AA	1165	6	360989	1547	0.4499	1.5682	0.697495	3.52587	0.28	0	B02AA Amino acids	0.412
p1yr	E	B02AA	3453	25	360989	1547	0.2164	1.2416	0.831984	1.85274	0.29	0	B02AA Amino acids	0.43
p1yr	E	B02AA	3471	7	362054	482	0.1024	1.1078	0.523653	2.3437	0.79	0	B02AA Amino acids	0.905
p1yr	F	B02AA	3471	7	24625	53	-0.4973	0.6082	0.273474	1.35255	0.22	0	B02AA Amino acids	0.481
p1yr	F	B02AA	3453	25	24552	126	-0.17	0.8436	0.544279	1.30762	0.45	0	B02AA Amino acids	0.681
p1yr	G	B02AA	1165	6	24552	126	-0.0487	0.9525	0.415488	2.18356	0.91	0	B02AA Amino acids	0.953
p1yr	A	B03AA	1101	70	2276	31	0.944	2.5701	1.6204	4.07645	6.1e-05	-1	B03AA Iron bivalent, oral preparations	0.000712
p1yr	A	B03AA	1084	87	2261	46	0.7901	2.2035	1.48185	3.27665	9.5e-05	-1	B03AA Iron bivalent, oral preparations	0.00142
p1yr	A	B03AA	1051	120	2221	86	0.5746	1.7764	1.29467	2.43748	0.00037	-1	B03AA Iron bivalent, oral preparations	0.00785
p1yr	A	B03AA	1005	166	2136	171	0.2108	1.2346	0.95606	1.59439	0.11	0	B03AA Iron bivalent, oral preparations	0.373
p1yr	B	B03AA	131	16	3246	85	0.9376	2.5537	1.36511	4.77736	0.0034	-1	B03AA Iron bivalent, oral preparations	0.0175
p1yr	B	B03AA	123	24	3149	182	0.5756	1.7782	1.05363	3.00115	0.031	-1	B03AA Iron bivalent, oral preparations	0.141
p1yr	B	B03AA	130	17	3215	116	0.6043	1.8299	1.00623	3.32786	0.048	-1	B03AA Iron bivalent, oral preparations	0.201
p1yr	B	B03AA	119	28	3022	309	0.2212	1.2476	0.768587	2.02522	0.37	0	B03AA Iron bivalent, oral preparations	0.717
p1yr	C	B03AA	1101	70	358768	3768	1.0636	2.8968	2.23532	3.75406	8.9e-16	-1	B03AA Iron bivalent, oral preparations	8.21e-15
p1yr	C	B03AA	1051	120	350381	12155	0.6169	1.8532	1.51316	2.26968	2.5e-09	-1	B03AA Iron bivalent, oral preparations	2.34e-08
p1yr	C	B03AA	1084	87	355195	7341	0.6966	2.0069	1.58887	2.53481	5e-09	-1	B03AA Iron bivalent, oral preparations	3.85e-08
p1yr	C	B03AA	1005	166	339886	22650	0.3924	1.4806	1.23991	1.76799	1.5e-05	-1	B03AA Iron bivalent, oral preparations	0.000101
p1yr	D	B03AA	131	16	358768	3768	1.4497	4.2616	2.44724	7.42125	3e-07	-1	B03AA Iron bivalent, oral preparations	9.75e-07
p1yr	D	B03AA	123	24	350381	12155	0.914	2.4943	1.56102	3.98541	0.00013	-1	B03AA Iron bivalent, oral preparations	0.000619
p1yr	D	B03AA	130	17	355195	7341	0.8986	2.4561	1.43364	4.20792	0.0011	-1	B03AA Iron bivalent, oral preparations	0.00338
p1yr	D	B03AA	119	28	339886	22650	0.4839	1.6224	1.04145	2.52747	0.032	-1	B03AA Iron bivalent, oral preparations	0.107
p1yr	E	B03AA	3377	101	358768	3768	0.732	2.0792	1.68729	2.56211	6.5e-12	-1	B03AA Iron bivalent, oral preparations	5.12e-11
p1yr	E	B03AA	3272	206	350381	12155	0.3648	1.4402	1.24145	1.6707	1.5e-06	-1	B03AA Iron bivalent, oral preparations	1.33e-05
p1yr	E	B03AA	3141	337	339886	22650	0.2634	1.3014	1.15506	1.46617	1.5e-05	-1	B03AA Iron bivalent, oral preparations	0.000121
p1yr	E	B03AA	3345	133	355195	7341	0.3783	1.4599	1.21708	1.75106	4.6e-05	-1	B03AA Iron bivalent, oral preparations	0.000259
p1yr	F	B03AA	3345	133	23381	1297	-0.2063	0.8136	0.673707	0.982439	0.032	1	B03AA Iron bivalent, oral preparations	0.164
p1yr	F	B03AA	3141	337	21796	2882	-0.1349	0.8738	0.770719	0.990645	0.035	1	B03AA Iron bivalent, oral preparations	0.18
p1yr	F	B03AA	3272	206	22849	1829	-0.1185	0.8883	0.760468	1.03759	0.14	0	B03AA Iron bivalent, oral preparations	0.375
p1yr	F	B03AA	3377	101	23801	877	-0.0933	0.911	0.733317	1.13163	0.4	0	B03AA Iron bivalent, oral preparations	0.716
p1yr	G	B03AA	1101	70	23801	877	0.3243	1.383	1.06537	1.79534	0.015	-1	B03AA Iron bivalent, oral preparations	0.0996
p1yr	G	B03AA	1051	120	22849	1829	0.1799	1.1971	0.975373	1.46922	0.085	0	B03AA Iron bivalent, oral preparations	0.324
p1yr	G	B03AA	1084	87	23381	1297	0.1781	1.195	0.944938	1.51114	0.14	0	B03AA Iron bivalent, oral preparations	0.381
p1yr	G	B03AA	1005	166	21796	2882	0.0278	1.0282	0.859497	1.23008	0.76	0	B03AA Iron bivalent, oral preparations	0.914
p1yr	H	B03AA	131	16	23801	877	0.7636	2.146	1.24037	3.71295	0.0063	-1	B03AA Iron bivalent, oral preparations	0.0205
p1yr	H	B03AA	123	24	22849	1829	0.539	1.7143	1.07719	2.72832	0.023	-1	B03AA Iron bivalent, oral preparations	0.0767
p1yr	H	B03AA	130	17	23381	1297	0.4686	1.5978	0.939295	2.71792	0.084	0	B03AA Iron bivalent, oral preparations	0.191
p1yr	H	B03AA	119	28	21796	2882	0.1866	1.2052	0.776258	1.87104	0.41	0	B03AA Iron bivalent, oral preparations	0.706
p1yr	A	B03BA	1125	46	2272	35	0.5271	1.694	1.04667	2.74193	0.032	-1	B03BA Vitamin B12 (cyanocobalamin and analogues)	0.124
p1yr	A	B03BA	1079	92	2211	96	0.1912	1.2107	0.873124	1.67884	0.25	0	B03BA Vitamin B12 (cyanocobalamin and analogues)	0.516
p1yr	A	B03BA	1100	71	2228	79	0.1233	1.1312	0.78874	1.62257	0.5	0	B03BA Vitamin B12 (cyanocobalamin and analogues)	0.673
p1yr	A	B03BA	1110	61	2239	68	0.0942	1.0988	0.74796	1.6143	0.63	0	B03BA Vitamin B12 (cyanocobalamin and analogues)	0.761
p1yr	B	B03BA	141	6	3187	144	-0.6992	0.497	0.207086	1.1927	0.12	0	B03BA Vitamin B12 (cyanocobalamin and analogues)	0.333
p1yr	B	B03BA	141	6	3208	123	-0.4941	0.6101	0.253887	1.46628	0.27	0	B03BA Vitamin B12 (cyanocobalamin and analogues)	0.47
p1yr	B	B03BA	133	14	3157	174	0.1035	1.1091	0.595354	2.06602	0.74	0	B03BA Vitamin B12 (cyanocobalamin and analogues)	0.882
p1yr	B	B03BA	141	6	3256	75	-0.0241	0.9761	0.395993	2.40623	0.96	0	B03BA Vitamin B12 (cyanocobalamin and analogues)	0.97
p1yr	C	B03BA	1125	46	358820	3716	0.8889	2.4325	1.79448	3.29731	1e-08	-1	B03BA Vitamin B12 (cyanocobalamin and analogues)	5.19e-08
p1yr	C	B03BA	1079	92	351190	11346	0.4131	1.5114	1.20755	1.89183	0.00031	-1	B03BA Vitamin B12 (cyanocobalamin and analogues)	0.00151
p1yr	C	B03BA	1110	61	354995	7541	0.437	1.5481	1.18472	2.0229	0.0014	-1	B03BA Vitamin B12 (cyanocobalamin and analogues)	0.00418
p1yr	C	B03BA	1100	71	353505	9031	0.3904	1.4776	1.15048	1.89782	0.0022	-1	B03BA Vitamin B12 (cyanocobalamin and analogues)	0.00795
p1yr	D	B03BA	141	6	358820	3716	0.7804	2.1824	0.952906	4.99814	0.065	0	B03BA Vitamin B12 (cyanocobalamin and analogues)	0.0939
p1yr	D	B03BA	133	14	351190	11346	0.417	1.5174	0.854059	2.69583	0.15	0	B03BA Vitamin B12 (cyanocobalamin and analogues)	0.332
p1yr	D	B03BA	141	6	353505	9031	-0.2839	0.7528	0.326455	1.73601	0.51	0	B03BA Vitamin B12 (cyanocobalamin and analogues)	0.593
p1yr	D	B03BA	141	6	354995	7541	-0.0814	0.9218	0.399631	2.12617	0.85	0	B03BA Vitamin B12 (cyanocobalamin and analogues)	0.86
p1yr	E	B03BA	3397	81	358820	3716	0.6409	1.8982	1.51219	2.38288	3.3e-08	-1	B03BA Vitamin B12 (cyanocobalamin and analogues)	1.71e-07
p1yr	E	B03BA	3349	129	354995	7541	0.3899	1.4768	1.2306	1.77226	2.8e-05	-1	B03BA Vitamin B12 (cyanocobalamin and analogues)	0.00017
p1yr	E	B03BA	3290	188	351190	11346	0.3288	1.3893	1.19103	1.62063	2.9e-05	-1	B03BA Vitamin B12 (cyanocobalamin and analogues)	0.00021
p1yr	E	B03BA	3328	150	353505	9031	0.3475	1.4155	1.19401	1.67808	6.3e-05	-1	B03BA Vitamin B12 (cyanocobalamin and analogues)	0.000374
p1yr	F	B03BA	3349	129	23779	899	0.1556	1.1684	0.961857	1.41923	0.12	0	B03BA Vitamin B12 (cyanocobalamin and analogues)	0.333
p1yr	F	B03BA	3328	150	23616	1062	0.1152	1.1222	0.935979	1.34536	0.21	0	B03BA Vitamin B12 (cyanocobalamin and analogues)	0.471
p1yr	F	B03BA	3290	188	23361	1317	0.0949	1.0996	0.932911	1.29604	0.26	0	B03BA Vitamin B12 (cyanocobalamin and analogues)	0.481
p1yr	F	B03BA	3397	81	24049	629	0.0484	1.0496	0.825633	1.33438	0.69	0	B03BA Vitamin B12 (cyanocobalamin and analogues)	0.85
p1yr	G	B03BA	1125	46	24049	629	0.3259	1.3853	1.014	1.89254	0.041	-1	B03BA Vitamin B12 (cyanocobalamin and analogues)	0.182
p1yr	G	B03BA	1110	61	23779	899	0.2008	1.2224	0.928892	1.60857	0.15	0	B03BA Vitamin B12 (cyanocobalamin and analogues)	0.385
p1yr	G	B03BA	1079	92	23361	1317	0.1665	1.1811	0.937634	1.48786	0.16	0	B03BA Vitamin B12 (cyanocobalamin and analogues)	0.505
p1yr	G	B03BA	1100	71	23616	1062	0.1536	1.166	0.901837	1.5075	0.24	0	B03BA Vitamin B12 (cyanocobalamin and analogues)	0.537
p1yr	H	B03BA	141	6	23616	1062	-0.5451	0.5798	0.249238	1.3487	0.21	0	B03BA Vitamin B12 (cyanocobalamin and analogues)	0.438
p1yr	H	B03BA	141	6	23779	899	-0.3375	0.7135	0.307038	1.65827	0.43	0	B03BA Vitamin B12 (cyanocobalamin and analogues)	0.563
p1yr	H	B03BA	141	6	24049	629	0.1872	1.2058	0.522837	2.78101	0.66	0	B03BA Vitamin B12 (cyanocobalamin and analogues)	0.715
p1yr	H	B03BA	133	14	23361	1317	0.1825	1.2002	0.671192	2.14604	0.54	0	B03BA Vitamin B12 (cyanocobalamin and analogues)	0.761
p1yr	A	B03BB	1030	141	2171	136	0.3152	1.3705	1.04546	1.79676	0.022	-1	B03BB Folic acid and derivatives	0.151
p1yr	A	B03BB	1069	102	2217	90	0.3077	1.3603	0.988654	1.87151	0.059	0	B03BB Folic acid and derivatives	0.245
p1yr	A	B03BB	1093	78	2239	68	0.2724	1.3131	0.915191	1.88399	0.14	0	B03BB Folic acid and derivatives	0.338
p1yr	A	B03BB	1111	60	2256	51	0.2043	1.2267	0.814643	1.84715	0.33	0	B03BB Folic acid and derivatives	0.508
p1yr	B	B03BB	132	15	3235	96	0.5065	1.6594	0.887635	3.10224	0.11	0	B03BB Folic acid and derivatives	0.217
p1yr	B	B03BB	129	18	3203	128	0.5034	1.6543	0.926909	2.95235	0.088	0	B03BB Folic acid and derivatives	0.275
p1yr	B	B03BB	127	20	3159	172	0.3369	1.4006	0.81058	2.4201	0.23	0	B03BB Folic acid and derivatives	0.479
p1yr	B	B03BB	121	26	3080	251	0.3411	1.4065	0.861626	2.29603	0.17	0	B03BB Folic acid and derivatives	0.502
p1yr	C	B03BB	1030	141	346452	16084	0.6196	1.8581	1.54396	2.23621	5.5e-11	-1	B03BB Folic acid and derivatives	1.11e-09
p1yr	C	B03BB	1111	60	357781	4755	0.8732	2.3946	1.8263	3.13982	2.7e-10	-1	B03BB Folic acid and derivatives	1.55e-09
p1yr	C	B03BB	1069	102	351648	10888	0.6459	1.9077	1.54285	2.3589	2.5e-09	-1	B03BB Folic acid and derivatives	2.34e-08
p1yr	C	B03BB	1093	78	354760	7776	0.7002	2.0141	1.58603	2.55769	9.3e-09	-1	B03BB Folic acid and derivatives	6.88e-08
p1yr	D	B03BB	132	15	357781	4755	1.3819	3.9826	2.2897	6.92727	9.9e-07	-1	B03BB Folic acid and derivatives	2.97e-06
p1yr	D	B03BB	129	18	354760	7776	1.1128	3.0429	1.82667	5.06906	1.9e-05	-1	B03BB Folic acid and derivatives	7.35e-05
p1yr	D	B03BB	127	20	351648	10888	0.8498	2.3392	1.43198	3.82127	0.00069	-1	B03BB Folic acid and derivatives	0.00238
p1yr	D	B03BB	121	26	346452	16084	0.7903	2.2041	1.41428	3.43489	0.00048	-1	B03BB Folic acid and derivatives	0.00313
p1yr	E	B03BB	3367	111	357781	4755	0.7105	2.035	1.67127	2.4779	1.5e-12	-1	B03BB Folic acid and derivatives	1.28e-11
p1yr	E	B03BB	3201	277	346452	16084	0.4363	1.547	1.3603	1.7594	3e-11	-1	B03BB Folic acid and derivatives	5.66e-10
p1yr	E	B03BB	3332	146	354760	7776	0.5178	1.6783	1.41308	1.99335	3.6e-09	-1	B03BB Folic acid and derivatives	4.05e-08
p1yr	E	B03BB	3286	192	351648	10888	0.4537	1.5741	1.35275	1.83165	4.4e-09	-1	B03BB Folic acid and derivatives	6.09e-08
p1yr	F	B03BB	3201	277	22781	1897	0.1699	1.1852	1.03278	1.3601	0.016	-1	B03BB Folic acid and derivatives	0.103
p1yr	F	B03BB	3332	146	23619	1059	0.1398	1.1501	0.957612	1.38126	0.14	0	B03BB Folic acid and derivatives	0.375
p1yr	F	B03BB	3286	192	23255	1423	0.1134	1.1201	0.953335	1.31593	0.17	0	B03BB Folic acid and derivatives	0.428
p1yr	F	B03BB	3367	111	23838	840	0.1064	1.1123	0.903406	1.36947	0.32	0	B03BB Folic acid and derivatives	0.664
p1yr	G	B03BB	1030	141	22781	1897	0.3539	1.4246	1.17807	1.72266	0.00026	-1	B03BB Folic acid and derivatives	0.00702
p1yr	G	B03BB	1069	102	23255	1423	0.3108	1.3645	1.09778	1.69605	0.0051	-1	B03BB Folic acid and derivatives	0.0457
p1yr	G	B03BB	1093	78	23619	1059	0.333	1.3952	1.09156	1.7833	0.0078	-1	B03BB Folic acid and derivatives	0.0555
p1yr	G	B03BB	1111	60	23838	840	0.2835	1.3278	1.00671	1.75121	0.045	-1	B03BB Folic acid and derivatives	0.182
p1yr	H	B03BB	129	18	23619	1059	0.7574	2.1328	1.27405	3.57043	0.004	-1	B03BB Folic acid and derivatives	0.0178
p1yr	H	B03BB	132	15	23838	840	0.769	2.1575	1.23351	3.77378	0.007	-1	B03BB Folic acid and derivatives	0.0218
p1yr	H	B03BB	127	20	23255	1423	0.5265	1.6929	1.03671	2.76454	0.035	-1	B03BB Folic acid and derivatives	0.106
p1yr	H	B03BB	121	26	22781	1897	0.5252	1.6908	1.08481	2.6353	0.02	-1	B03BB Folic acid and derivatives	0.131
p1yr	C	B03XA	1161	10	362344	192	1.6963	5.454	2.69418	11.0407	2.4e-06	-1	B03XA Other antianemic preparations	2.08e-05
p1yr	C	B03XA	1165	6	362418	118	1.5791	4.8507	1.9914	11.8152	0.00051	-1	B03XA Other antianemic preparations	0.00206
p1yr	E	B03XA	3466	12	362344	192	1.3185	3.7379	1.99305	7.01015	4e-05	-1	B03XA Other antianemic preparations	0.000283
p1yr	E	B03XA	3471	7	362418	118	1.2086	3.3487	1.49453	7.50333	0.0033	-1	B03XA Other antianemic preparations	0.0142
p1yr	F	B03XA	3466	12	24605	73	0.2832	1.3274	0.705838	2.49641	0.38	0	B03XA Other antianemic preparations	0.618
p1yr	F	B03XA	3471	7	24634	44	0.2191	1.245	0.55191	2.80842	0.6	0	B03XA Other antianemic preparations	0.795
p1yr	G	B03XA	1161	10	24605	73	0.6913	1.9963	0.999472	3.98717	0.05	0	B03XA Other antianemic preparations	0.318
p1yr	G	B03XA	1165	6	24634	44	0.6695	1.9533	0.814501	4.68434	0.13	0	B03XA Other antianemic preparations	0.383
p1yr	A	B05CB	1156	15	2300	7	0.7441	2.1045	0.834902	5.3046	0.12	0	B05CB Salt solutions	0.323
p1yr	A	B05CB	1140	31	2288	19	0.4873	1.6279	0.891198	2.97371	0.11	0	B05CB Salt solutions	0.373
p1yr	A	B05CB	1153	18	2297	10	0.5351	1.7076	0.764164	3.81559	0.19	0	B05CB Salt solutions	0.427
p1yr	B	B05CB	140	7	3310	21	0.9486	2.5822	0.990516	6.73165	0.052	0	B05CB Salt solutions	0.193
p1yr	B	B05CB	142	5	3314	17	0.861	2.3656	0.787565	7.10549	0.12	0	B05CB Salt solutions	0.285
p1yr	B	B05CB	140	7	3288	43	0.2016	1.2233	0.506983	2.95191	0.65	0	B05CB Salt solutions	0.84
p1yr	C	B05CB	1156	15	362082	454	1.7728	5.8871	3.47003	9.98777	4.9e-11	-1	B05CB Salt solutions	4.77e-10
p1yr	C	B05CB	1163	8	362377	159	2.1339	8.4478	4.05612	17.5944	1.2e-08	-1	B05CB Salt solutions	6.04e-08
p1yr	C	B05CB	1153	18	361562	974	1.1852	3.2712	2.02068	5.29563	1.4e-06	-1	B05CB Salt solutions	8.24e-06
p1yr	C	B05CB	1140	31	360130	2406	0.8862	2.426	1.68259	3.4978	2.1e-06	-1	B05CB Salt solutions	1.96e-05
p1yr	D	B05CB	142	5	362082	454	2.3248	10.2249	4.05086	25.8089	8.6e-07	-1	B05CB Salt solutions	4.5e-06
p1yr	D	B05CB	140	7	361562	974	1.8927	6.6374	3.00763	14.6477	2.8e-06	-1	B05CB Salt solutions	2.33e-05
p1yr	D	B05CB	140	7	360130	2406	1.0525	2.8649	1.32057	6.21504	0.0077	-1	B05CB Salt solutions	0.0308
p1yr	E	B05CB	3456	22	362082	454	1.4712	4.3543	2.81363	6.73849	4e-11	-1	B05CB Salt solutions	5.62e-10
p1yr	E	B05CB	3467	11	362377	159	1.8229	6.1895	3.313	11.5636	1.1e-08	-1	B05CB Salt solutions	6.02e-08
p1yr	E	B05CB	3450	28	361562	974	0.9388	2.5568	1.74185	3.75301	1.6e-06	-1	B05CB Salt solutions	1.37e-05
p1yr	E	B05CB	3428	50	360130	2406	0.6299	1.8775	1.40955	2.50072	1.7e-05	-1	B05CB Salt solutions	0.00013
p1yr	F	B05CB	3456	22	24560	118	0.4408	1.554	0.975596	2.47529	0.064	0	B05CB Salt solutions	0.257
p1yr	F	B05CB	3467	11	24614	64	0.3366	1.4001	0.729696	2.68658	0.31	0	B05CB Salt solutions	0.65
p1yr	F	B05CB	3450	28	24483	195	0.1516	1.1637	0.774911	1.74742	0.47	0	B05CB Salt solutions	0.692
p1yr	F	B05CB	3428	50	24312	366	0.0992	1.1042	0.813898	1.49815	0.52	0	B05CB Salt solutions	0.739
p1yr	G	B05CB	1156	15	24560	118	0.8078	2.2429	1.29306	3.89062	0.004	-1	B05CB Salt solutions	0.0322
p1yr	G	B05CB	1163	8	24614	64	0.7646	2.1481	1.01283	4.55601	0.046	-1	B05CB Salt solutions	0.182
p1yr	G	B05CB	1140	31	24312	366	0.4028	1.4961	1.02428	2.18514	0.037	-1	B05CB Salt solutions	0.287
p1yr	G	B05CB	1153	18	24483	195	0.4531	1.5732	0.956747	2.58672	0.074	0	B05CB Salt solutions	0.299
p1yr	H	B05CB	140	7	24483	195	1.2849	3.6143	1.6191	8.06802	0.0017	-1	B05CB Salt solutions	0.0106
p1yr	H	B05CB	142	5	24560	118	1.4436	4.2358	1.64987	10.8748	0.0027	-1	B05CB Salt solutions	0.0134
p1yr	H	B05CB	140	7	24312	366	0.6517	1.9188	0.872974	4.21734	0.1	0	B05CB Salt solutions	0.388
p1yr	C	B05XA	1159	12	361935	601	0.7962	2.2171	1.20527	4.07822	0.011	-1	B05XA Electrolyte solutions	0.0318
p1yr	C	B05XA	1163	8	362060	476	0.6227	1.864	0.895663	3.87916	0.096	0	B05XA Electrolyte solutions	0.17
p1yr	C	B05XA	1166	5	362120	416	0.2502	1.2843	0.514686	3.20481	0.59	0	B05XA Electrolyte solutions	0.718
p1yr	E	B05XA	3463	15	361935	601	0.4313	1.5392	0.903492	2.62236	0.11	0	B05XA Electrolyte solutions	0.221
p1yr	E	B05XA	3468	10	362060	476	0.2692	1.3089	0.687089	2.49331	0.41	0	B05XA Electrolyte solutions	0.587
p1yr	E	B05XA	3472	6	362210	326	0.112	1.1185	0.490466	2.55068	0.79	0	B05XA Electrolyte solutions	0.832
p1yr	E	B05XA	3471	7	362120	416	0.0344	1.035	0.481827	2.22339	0.93	0	B05XA Electrolyte solutions	0.97
p1yr	F	B05XA	3471	7	24576	102	-0.6484	0.5229	0.238904	1.14447	0.1	0	B05XA Electrolyte solutions	0.3
p1yr	F	B05XA	3463	15	24516	162	-0.3857	0.68	0.393078	1.17638	0.17	0	B05XA Electrolyte solutions	0.382
p1yr	F	B05XA	3468	10	24558	120	-0.47	0.625	0.322051	1.21293	0.17	0	B05XA Electrolyte solutions	0.428
p1yr	F	B05XA	3472	6	24597	81	-0.5491	0.5775	0.247589	1.34681	0.2	0	B05XA Electrolyte solutions	0.571
p1yr	G	B05XA	1166	5	24576	102	-0.3104	0.7331	0.292133	1.83992	0.51	0	B05XA Electrolyte solutions	0.699
p1yr	G	B05XA	1159	12	24516	162	0.1004	1.1056	0.598106	2.04368	0.75	0	B05XA Electrolyte solutions	0.914
p1yr	G	B05XA	1163	8	24558	120	0.0025	1.0025	0.478166	2.10184	0.99	0	B05XA Electrolyte solutions	0.99
p1yr	A	C01AA	1157	14	2287	20	-0.5006	0.6062	0.291902	1.25866	0.18	0	C01AA Digitalis glycosides [DG:DG01697]	0.399
p1yr	A	C01AA	1158	13	2289	18	-0.458	0.6325	0.296027	1.35166	0.24	0	C01AA Digitalis glycosides [DG:DG01697]	0.42
p1yr	A	C01AA	1155	16	2287	20	-0.3078	0.7351	0.363522	1.48632	0.39	0	C01AA Digitalis glycosides [DG:DG01697]	0.591
p1yr	A	C01AA	1146	25	2283	24	-0.1457	0.8644	0.47077	1.58716	0.64	0	C01AA Digitalis glycosides [DG:DG01697]	0.798
p1yr	B	C01AA	139	8	3290	41	0.3723	1.451	0.624721	3.37032	0.39	0	C01AA Digitalis glycosides [DG:DG01697]	0.719
p1yr	B	C01AA	142	5	3300	31	0.1854	1.2037	0.431886	3.35479	0.72	0	C01AA Digitalis glycosides [DG:DG01697]	0.837
p1yr	C	C01AA	1146	25	359657	2879	0.3733	1.4525	0.967675	2.18026	0.072	0	C01AA Digitalis glycosides [DG:DG01697]	0.153
p1yr	C	C01AA	1158	13	360866	1670	0.2135	1.238	0.709115	2.1613	0.45	0	C01AA Digitalis glycosides [DG:DG01697]	0.534
p1yr	C	C01AA	1155	16	360177	2359	0.1175	1.1246	0.680546	1.85856	0.65	0	C01AA Digitalis glycosides [DG:DG01697]	0.724
p1yr	C	C01AA	1157	14	360421	2115	0.0786	1.0818	0.632862	1.84907	0.77	0	C01AA Digitalis glycosides [DG:DG01697]	0.838
p1yr	D	C01AA	139	8	359657	2879	0.7918	2.2073	1.05821	4.60402	0.035	-1	C01AA Digitalis glycosides [DG:DG01697]	0.114
p1yr	D	C01AA	142	5	360177	2359	0.4892	1.631	0.654491	4.06466	0.29	0	C01AA Digitalis glycosides [DG:DG01697]	0.414
p1yr	E	C01AA	3429	49	359657	2879	0.4505	1.5691	1.17354	2.09788	0.0024	-1	C01AA Digitalis glycosides [DG:DG01697]	0.0104
p1yr	E	C01AA	3447	31	360866	1670	0.5196	1.6814	1.16927	2.41791	0.005	-1	C01AA Digitalis glycosides [DG:DG01697]	0.0113
p1yr	E	C01AA	3444	34	360421	2115	0.3934	1.482	1.04834	2.09511	0.026	-1	C01AA Digitalis glycosides [DG:DG01697]	0.0705
p1yr	E	C01AA	3442	36	360177	2359	0.3454	1.4125	1.0091	1.97727	0.044	-1	C01AA Digitalis glycosides [DG:DG01697]	0.106
p1yr	F	C01AA	3442	36	24259	419	-0.1957	0.8222	0.580232	1.16519	0.27	0	C01AA Digitalis glycosides [DG:DG01697]	0.529
p1yr	F	C01AA	3444	34	24309	369	-0.1184	0.8883	0.619883	1.27306	0.52	0	C01AA Digitalis glycosides [DG:DG01697]	0.741
p1yr	F	C01AA	3429	49	24183	495	-0.0702	0.9322	0.688837	1.26151	0.65	0	C01AA Digitalis glycosides [DG:DG01697]	0.818
p1yr	F	C01AA	3447	31	24352	326	-0.0902	0.9138	0.626615	1.33251	0.64	0	C01AA Digitalis glycosides [DG:DG01697]	0.846
p1yr	G	C01AA	1157	14	24309	369	-0.3857	0.68	0.394504	1.17198	0.17	0	C01AA Digitalis glycosides [DG:DG01697]	0.408
p1yr	G	C01AA	1155	16	24259	419	-0.3693	0.6912	0.415103	1.15096	0.16	0	C01AA Digitalis glycosides [DG:DG01697]	0.452
p1yr	G	C01AA	1158	13	24352	326	-0.3446	0.7085	0.402509	1.2472	0.23	0	C01AA Digitalis glycosides [DG:DG01697]	0.455
p1yr	G	C01AA	1146	25	24183	495	-0.0936	0.9106	0.601791	1.37795	0.66	0	C01AA Digitalis glycosides [DG:DG01697]	0.872
p1yr	H	C01AA	139	8	24183	495	0.3341	1.3966	0.664072	2.93723	0.38	0	C01AA Digitalis glycosides [DG:DG01697]	0.693
p1yr	H	C01AA	142	5	24259	419	-0.0098	0.9902	0.39419	2.48748	0.98	0	C01AA Digitalis glycosides [DG:DG01697]	0.98
p1yr	E	C01BC	3472	6	361194	1342	-0.6681	0.5127	0.229877	1.14336	0.1	0	C01BC Antiarrhythmics, class Ic [DG:DG01650]	0.202
p1yr	E	C01BC	3468	10	360715	1821	-0.4722	0.6236	0.334517	1.16266	0.14	0	C01BC Antiarrhythmics, class Ic [DG:DG01650]	0.264
p1yr	E	C01BC	3472	6	361419	1117	-0.4856	0.6153	0.275533	1.37411	0.24	0	C01BC Antiarrhythmics, class Ic [DG:DG01650]	0.394
p1yr	F	C01BC	3468	10	24468	210	-0.9273	0.3956	0.208782	0.749724	0.0045	1	C01BC Antiarrhythmics, class Ic [DG:DG01650]	0.0411
p1yr	F	C01BC	3472	6	24525	153	-1.113	0.3286	0.144686	0.746202	0.0078	1	C01BC Antiarrhythmics, class Ic [DG:DG01650]	0.0719
p1yr	F	C01BC	3472	6	24553	125	-0.9258	0.3962	0.173628	0.904152	0.028	1	C01BC Antiarrhythmics, class Ic [DG:DG01650]	0.154
p1yr	A	C01BD	1166	5	2298	9	-0.3004	0.7405	0.238878	2.29582	0.6	0	C01BD Antiarrhythmics, class III [DG:DG01648]	0.754
p1yr	A	C01BD	1160	11	2293	14	0.0604	1.0623	0.464119	2.43149	0.89	0	C01BD Antiarrhythmics, class III [DG:DG01648]	0.944
p1yr	C	C01BD	1166	5	361582	954	-0.1651	0.8478	0.342372	2.09939	0.72	0	C01BD Antiarrhythmics, class III [DG:DG01648]	0.785
p1yr	C	C01BD	1160	11	360777	1759	0.0578	1.0595	0.574917	1.95241	0.85	0	C01BD Antiarrhythmics, class III [DG:DG01648]	0.902
p1yr	E	C01BD	3466	12	361857	679	0.3831	1.4668	0.816354	2.63564	0.2	0	C01BD Antiarrhythmics, class III [DG:DG01648]	0.349
p1yr	E	C01BD	3453	25	360777	1759	0.2373	1.2678	0.846685	1.89825	0.25	0	C01BD Antiarrhythmics, class III [DG:DG01648]	0.385
p1yr	E	C01BD	3470	8	362097	439	0.3661	1.442	0.700553	2.96835	0.32	0	C01BD Antiarrhythmics, class III [DG:DG01648]	0.402
p1yr	E	C01BD	3464	14	361582	954	0.2469	1.2801	0.746669	2.19456	0.37	0	C01BD Antiarrhythmics, class III [DG:DG01648]	0.548
p1yr	F	C01BD	3453	25	24375	303	-0.3813	0.683	0.450311	1.03583	0.073	0	C01BD Antiarrhythmics, class III [DG:DG01648]	0.255
p1yr	F	C01BD	3464	14	24491	187	-0.4826	0.6172	0.355273	1.07219	0.087	0	C01BD Antiarrhythmics, class III [DG:DG01648]	0.278
p1yr	F	C01BD	3466	12	24541	137	-0.3302	0.7188	0.393599	1.31266	0.28	0	C01BD Antiarrhythmics, class III [DG:DG01648]	0.558
p1yr	F	C01BD	3470	8	24577	101	-0.4207	0.6566	0.3147	1.36984	0.26	0	C01BD Antiarrhythmics, class III [DG:DG01648]	0.632
p1yr	G	C01BD	1166	5	24491	187	-0.8038	0.4476	0.180904	1.10756	0.082	0	C01BD Antiarrhythmics, class III [DG:DG01648]	0.319
p1yr	G	C01BD	1160	11	24375	303	-0.4586	0.6322	0.34109	1.17173	0.14	0	C01BD Antiarrhythmics, class III [DG:DG01648]	0.473
p1yr	A	C01CA	1164	7	2301	6	0.8567	2.3555	0.757962	7.31992	0.14	0	C01CA Adrenergic and dopaminergic agents	0.388
p1yr	A	C01CA	1163	8	2299	8	0.6016	1.8251	0.652153	5.1075	0.25	0	C01CA Adrenergic and dopaminergic agents	0.516
p1yr	C	C01CA	1166	5	362159	377	1.3612	3.9007	1.60164	9.49999	0.0027	-1	C01CA Adrenergic and dopaminergic agents	0.00547
p1yr	C	C01CA	1165	6	361609	927	0.6848	1.9834	0.88372	4.45143	0.097	0	C01CA Adrenergic and dopaminergic agents	0.162
p1yr	C	C01CA	1164	7	360979	1557	0.3625	1.4369	0.68065	3.03328	0.34	0	C01CA Adrenergic and dopaminergic agents	0.455
p1yr	C	C01CA	1163	8	360588	1948	0.2598	1.2966	0.644589	2.60824	0.47	0	C01CA Adrenergic and dopaminergic agents	0.608
p1yr	E	C01CA	3471	7	362159	377	0.6476	1.9109	0.900101	4.05691	0.092	0	C01CA Adrenergic and dopaminergic agents	0.146
p1yr	E	C01CA	3462	16	360588	1948	-0.1865	0.8299	0.506222	1.36044	0.46	0	C01CA Adrenergic and dopaminergic agents	0.584
p1yr	E	C01CA	3465	13	360979	1557	-0.1579	0.8539	0.493553	1.47731	0.57	0	C01CA Adrenergic and dopaminergic agents	0.728
p1yr	E	C01CA	3470	8	361609	927	-0.1375	0.8715	0.433456	1.75242	0.7	0	C01CA Adrenergic and dopaminergic agents	0.82
p1yr	F	C01CA	3470	8	24565	113	-0.6189	0.5385	0.260694	1.11249	0.095	0	C01CA Adrenergic and dopaminergic agents	0.293
p1yr	F	C01CA	3462	16	24495	183	-0.4188	0.6578	0.391375	1.10562	0.11	0	C01CA Adrenergic and dopaminergic agents	0.294
p1yr	F	C01CA	3465	13	24526	152	-0.4367	0.6461	0.363611	1.14822	0.14	0	C01CA Adrenergic and dopaminergic agents	0.375
p1yr	F	C01CA	3471	7	24615	63	-0.1122	0.8939	0.404464	1.97551	0.78	0	C01CA Adrenergic and dopaminergic agents	0.905
p1yr	G	C01CA	1166	5	24615	63	0.6657	1.9458	0.774989	4.88566	0.16	0	C01CA Adrenergic and dopaminergic agents	0.364
p1yr	G	C01CA	1165	6	24565	113	0.24	1.2713	0.554882	2.91255	0.57	0	C01CA Adrenergic and dopaminergic agents	0.77
p1yr	G	C01CA	1164	7	24526	152	0.1022	1.1076	0.515556	2.37943	0.79	0	C01CA Adrenergic and dopaminergic agents	0.904
p1yr	G	C01CA	1163	8	24495	183	0.0278	1.0282	0.503137	2.10103	0.94	0	C01CA Adrenergic and dopaminergic agents	0.966
p1yr	A	C01DA	1034	137	2158	149	-0.0637	0.9383	0.68955	1.27681	0.69	0	C01DA Organic nitrates	0.829
p1yr	A	C01DA	1064	107	2204	103	0.0548	1.0563	0.750646	1.4864	0.75	0	C01DA Organic nitrates	0.848
p1yr	A	C01DA	1089	82	2233	74	0.0514	1.0528	0.718715	1.54205	0.79	0	C01DA Organic nitrates	0.87
p1yr	A	C01DA	1113	58	2257	50	0.038	1.0387	0.66764	1.616	0.87	0	C01DA Organic nitrates	0.916
p1yr	B	C01DA	138	9	3184	147	-0.4887	0.6134	0.280786	1.3402	0.22	0	C01DA Organic nitrates	0.43
p1yr	B	C01DA	139	8	3231	100	-0.2202	0.8024	0.351777	1.83015	0.6	0	C01DA Organic nitrates	0.7
p1yr	B	C01DA	132	15	3136	195	-0.137	0.872	0.448038	1.69704	0.69	0	C01DA Organic nitrates	0.837
p1yr	B	C01DA	127	20	3065	266	-0.1095	0.8962	0.4863	1.65178	0.72	0	C01DA Organic nitrates	0.879
p1yr	C	C01DA	1113	58	357699	4837	0.421	1.5235	1.13318	2.04829	0.0053	-1	C01DA Organic nitrates	0.0101
p1yr	C	C01DA	1089	82	352805	9731	0.1548	1.1674	0.900795	1.51303	0.24	0	C01DA Organic nitrates	0.355
p1yr	C	C01DA	1064	107	347910	14626	0.0955	1.1002	0.869063	1.39273	0.43	0	C01DA Organic nitrates	0.547
p1yr	C	C01DA	1034	137	340722	21814	-0.011	0.9891	0.794725	1.23092	0.92	0	C01DA Organic nitrates	0.943
p1yr	D	C01DA	138	9	352805	9731	-0.4247	0.654	0.311168	1.37455	0.26	0	C01DA Organic nitrates	0.362
p1yr	D	C01DA	127	20	340722	21814	-0.1976	0.8207	0.464682	1.4496	0.5	0	C01DA Organic nitrates	0.68
p1yr	D	C01DA	132	15	347910	14626	-0.1586	0.8534	0.459942	1.58329	0.61	0	C01DA Organic nitrates	0.685
p1yr	D	C01DA	139	8	357699	4837	0.1317	1.1408	0.52126	2.49652	0.74	0	C01DA Organic nitrates	0.77
p1yr	E	C01DA	3370	108	357699	4837	0.5115	1.6678	1.34674	2.0654	2.7e-06	-1	C01DA Organic nitrates	1.04e-05
p1yr	E	C01DA	3322	156	352805	9731	0.2187	1.2444	1.03533	1.49574	0.02	-1	C01DA Organic nitrates	0.057
p1yr	E	C01DA	3268	210	347910	14626	0.1533	1.1656	0.989674	1.37286	0.066	0	C01DA Organic nitrates	0.148
p1yr	E	C01DA	3192	286	340722	21814	0.0919	1.0962	0.946632	1.26951	0.22	0	C01DA Organic nitrates	0.364
p1yr	F	C01DA	3192	286	22094	2584	-0.1068	0.8987	0.773663	1.04401	0.16	0	C01DA Organic nitrates	0.371
p1yr	F	C01DA	3268	210	22775	1903	-0.0895	0.9144	0.774003	1.08027	0.29	0	C01DA Organic nitrates	0.535
p1yr	F	C01DA	3322	156	23272	1406	-0.0692	0.9332	0.773525	1.12577	0.47	0	C01DA Organic nitrates	0.696
p1yr	F	C01DA	3370	108	23709	969	-0.0444	0.9565	0.768368	1.19077	0.69	0	C01DA Organic nitrates	0.85
p1yr	G	C01DA	1034	137	22094	2584	-0.1537	0.8575	0.69007	1.0656	0.17	0	C01DA Organic nitrates	0.51
p1yr	G	C01DA	1064	107	22775	1903	-0.0904	0.9136	0.722889	1.15455	0.45	0	C01DA Organic nitrates	0.748
p1yr	G	C01DA	1113	58	23709	969	-0.0631	0.9389	0.697925	1.26307	0.68	0	C01DA Organic nitrates	0.801
p1yr	G	C01DA	1089	82	23272	1406	-0.0657	0.9364	0.723292	1.21225	0.62	0	C01DA Organic nitrates	0.802
p1yr	H	C01DA	138	9	23272	1406	-0.579	0.5605	0.269184	1.16694	0.12	0	C01DA Organic nitrates	0.237
p1yr	H	C01DA	139	8	23709	969	-0.2903	0.748	0.345691	1.61852	0.46	0	C01DA Organic nitrates	0.588
p1yr	H	C01DA	132	15	22775	1903	-0.2816	0.7546	0.410746	1.38635	0.36	0	C01DA Organic nitrates	0.6
p1yr	H	C01DA	127	20	22094	2584	-0.2597	0.7713	0.441123	1.34851	0.36	0	C01DA Organic nitrates	0.685
p1yr	A	C01DX	1159	12	2301	6	0.4512	1.5702	0.55847	4.41435	0.39	0	C01DX Other vasodilators used in cardiac diseases	0.591
p1yr	A	C01DX	1154	17	2296	11	0.2534	1.2884	0.571834	2.90297	0.54	0	C01DX Other vasodilators used in cardiac diseases	0.734
p1yr	C	C01DX	1159	12	360962	1574	-0.3303	0.7187	0.398164	1.29739	0.27	0	C01DX Other vasodilators used in cardiac diseases	0.389
p1yr	C	C01DX	1160	11	361123	1413	-0.3256	0.7221	0.390061	1.3367	0.3	0	C01DX Other vasodilators used in cardiac diseases	0.427
p1yr	C	C01DX	1154	17	360446	2090	-0.2349	0.7906	0.478192	1.30726	0.36	0	C01DX Other vasodilators used in cardiac diseases	0.489
p1yr	C	C01DX	1160	11	361466	1070	-0.0489	0.9522	0.513206	1.76687	0.88	0	C01DX Other vasodilators used in cardiac diseases	0.891
p1yr	E	C01DX	3463	15	361123	1413	-0.4588	0.632	0.37462	1.06628	0.086	0	C01DX Other vasodilators used in cardiac diseases	0.188
p1yr	E	C01DX	3460	18	360962	1574	-0.3677	0.6924	0.428712	1.11813	0.13	0	C01DX Other vasodilators used in cardiac diseases	0.249
p1yr	E	C01DX	3464	14	361466	1070	-0.2525	0.7769	0.451715	1.33611	0.36	0	C01DX Other vasodilators used in cardiac diseases	0.443
p1yr	E	C01DX	3450	28	360446	2090	-0.1794	0.8357	0.565939	1.23415	0.37	0	C01DX Other vasodilators used in cardiac diseases	0.503
p1yr	F	C01DX	3463	15	24473	205	-0.4378	0.6454	0.376783	1.10562	0.11	0	C01DX Other vasodilators used in cardiac diseases	0.321
p1yr	F	C01DX	3460	18	24442	236	-0.3937	0.6745	0.411598	1.1054	0.12	0	C01DX Other vasodilators used in cardiac diseases	0.34
p1yr	F	C01DX	3450	28	24355	323	-0.256	0.7741	0.517181	1.15878	0.21	0	C01DX Other vasodilators used in cardiac diseases	0.444
p1yr	F	C01DX	3464	14	24496	182	-0.3887	0.678	0.388202	1.18402	0.17	0	C01DX Other vasodilators used in cardiac diseases	0.515
p1yr	G	C01DX	1160	11	24473	205	-0.2539	0.7757	0.414489	1.45184	0.43	0	C01DX Other vasodilators used in cardiac diseases	0.631
p1yr	G	C01DX	1159	12	24442	236	-0.3033	0.7384	0.405014	1.34613	0.32	0	C01DX Other vasodilators used in cardiac diseases	0.634
p1yr	G	C01DX	1154	17	24355	323	-0.2549	0.775	0.46478	1.29231	0.33	0	C01DX Other vasodilators used in cardiac diseases	0.642
p1yr	G	C01DX	1160	11	24496	182	-0.1375	0.8715	0.464668	1.63455	0.67	0	C01DX Other vasodilators used in cardiac diseases	0.8
p1yr	A	C01EB	1163	8	2289	18	-1.067	0.344	0.139966	0.845276	0.02	1	C01EB Other cardiac preparations	0.147
p1yr	A	C01EB	1163	8	2291	16	-0.8813	0.4142	0.165849	1.03468	0.059	0	C01EB Other cardiac preparations	0.206
p1yr	A	C01EB	1164	7	2294	13	-0.7777	0.4595	0.170428	1.23872	0.12	0	C01EB Other cardiac preparations	0.305
p1yr	A	C01EB	1158	13	2289	18	-0.5725	0.5641	0.258952	1.22879	0.15	0	C01EB Other cardiac preparations	0.415
p1yr	C	C01EB	1163	8	361301	1235	-0.3201	0.7261	0.356462	1.47908	0.38	0	C01EB Other cardiac preparations	0.489
p1yr	C	C01EB	1163	8	361474	1062	-0.203	0.8163	0.400121	1.66531	0.58	0	C01EB Other cardiac preparations	0.718
p1yr	C	C01EB	1164	7	361729	807	-0.1012	0.9038	0.421541	1.93769	0.8	0	C01EB Other cardiac preparations	0.846
p1yr	C	C01EB	1158	13	361013	1523	0.0113	1.0113	0.575057	1.77859	0.97	0	C01EB Other cardiac preparations	0.974
p1yr	E	C01EB	3458	20	361729	807	0.4316	1.5396	0.974478	2.43258	0.064	0	C01EB Other cardiac preparations	0.109
p1yr	E	C01EB	3454	24	361474	1062	0.3632	1.4379	0.946956	2.1835	0.088	0	C01EB Other cardiac preparations	0.189
p1yr	E	C01EB	3447	31	361013	1523	0.3144	1.3695	0.947433	1.97957	0.094	0	C01EB Other cardiac preparations	0.197
p1yr	E	C01EB	3452	26	361301	1235	0.3203	1.3775	0.922331	2.05735	0.12	0	C01EB Other cardiac preparations	0.235
p1yr	F	C01EB	3454	24	24504	174	0.1286	1.1373	0.730579	1.7703	0.57	0	C01EB Other cardiac preparations	0.759
p1yr	F	C01EB	3458	20	24527	151	0.1045	1.1102	0.686067	1.79638	0.67	0	C01EB Other cardiac preparations	0.85
p1yr	F	C01EB	3447	31	24414	264	-0.0244	0.9759	0.662626	1.43727	0.9	0	C01EB Other cardiac preparations	0.954
p1yr	F	C01EB	3452	26	24468	210	0.0162	1.0164	0.665919	1.55125	0.94	0	C01EB Other cardiac preparations	0.967
p1yr	G	C01EB	1163	8	24468	210	-0.6046	0.5463	0.265355	1.12474	0.1	0	C01EB Other cardiac preparations	0.327
p1yr	G	C01EB	1163	8	24504	174	-0.4075	0.6653	0.322023	1.37468	0.27	0	C01EB Other cardiac preparations	0.561
p1yr	G	C01EB	1164	7	24527	151	-0.3742	0.6879	0.317133	1.49193	0.34	0	C01EB Other cardiac preparations	0.576
p1yr	G	C01EB	1158	13	24414	264	-0.3096	0.7338	0.412936	1.30389	0.29	0	C01EB Other cardiac preparations	0.607
p1yr	C	C02AC	1165	6	361718	818	0.0401	1.041	0.459467	2.35836	0.92	0	C02AC Imidazoline receptor agonists	0.943
p1yr	E	C02AC	3470	8	361718	818	-0.3265	0.7214	0.357335	1.45651	0.36	0	C02AC Imidazoline receptor agonists	0.502
p1yr	E	C02AC	3472	6	361923	613	-0.33	0.7189	0.320067	1.61475	0.42	0	C02AC Imidazoline receptor agonists	0.594
p1yr	E	C02AC	3472	6	362000	536	-0.1905	0.8266	0.367662	1.85823	0.65	0	C02AC Imidazoline receptor agonists	0.791
p1yr	F	C02AC	3472	6	24605	73	-0.4585	0.6322	0.271628	1.47158	0.29	0	C02AC Imidazoline receptor agonists	0.535
p1yr	F	C02AC	3470	8	24585	93	-0.3806	0.6835	0.327773	1.42522	0.31	0	C02AC Imidazoline receptor agonists	0.542
p1yr	F	C02AC	3472	6	24616	62	-0.2755	0.7592	0.323625	1.78086	0.53	0	C02AC Imidazoline receptor agonists	0.741
p1yr	G	C02AC	1165	6	24585	93	-0.0652	0.9369	0.401662	2.18526	0.88	0	C02AC Imidazoline receptor agonists	0.942
p1yr	A	C02CA	1122	49	2250	57	-0.2446	0.783	0.513161	1.19484	0.26	0	C02CA Alpha-adrenoreceptor antagonists	0.491
p1yr	A	C02CA	1138	33	2270	37	-0.2401	0.7865	0.470978	1.31362	0.36	0	C02CA Alpha-adrenoreceptor antagonists	0.536
p1yr	A	C02CA	1100	71	2236	71	-0.1553	0.8561	0.590146	1.24203	0.41	0	C02CA Alpha-adrenoreceptor antagonists	0.651
p1yr	A	C02CA	1127	44	2260	47	-0.1274	0.8804	0.56112	1.38117	0.58	0	C02CA Alpha-adrenoreceptor antagonists	0.737
p1yr	B	C02CA	142	5	3230	101	-0.5841	0.5576	0.214652	1.44842	0.23	0	C02CA Alpha-adrenoreceptor antagonists	0.479
p1yr	B	C02CA	142	5	3245	86	-0.3899	0.6771	0.258784	1.7717	0.43	0	C02CA Alpha-adrenoreceptor antagonists	0.582
p1yr	B	C02CA	138	9	3198	133	-0.3829	0.6819	0.325305	1.42936	0.31	0	C02CA Alpha-adrenoreceptor antagonists	0.699
p1yr	B	C02CA	142	5	3266	65	-0.111	0.895	0.335091	2.3903	0.82	0	C02CA Alpha-adrenoreceptor antagonists	0.902
p1yr	C	C02CA	1122	49	353379	9157	-0.1704	0.8433	0.627219	1.13388	0.26	0	C02CA Alpha-adrenoreceptor antagonists	0.385
p1yr	C	C02CA	1127	44	354430	8106	-0.161	0.8513	0.623767	1.16177	0.31	0	C02CA Alpha-adrenoreceptor antagonists	0.438
p1yr	C	C02CA	1138	33	356552	5984	-0.1641	0.8487	0.594807	1.21085	0.37	0	C02CA Alpha-adrenoreceptor antagonists	0.448
p1yr	C	C02CA	1100	71	350934	11602	-0.0204	0.9798	0.761672	1.26045	0.87	0	C02CA Alpha-adrenoreceptor antagonists	0.915
p1yr	D	C02CA	142	5	353379	9157	-0.7465	0.474	0.191648	1.17246	0.11	0	C02CA Alpha-adrenoreceptor antagonists	0.186
p1yr	D	C02CA	142	5	354430	8106	-0.6179	0.5391	0.217864	1.33397	0.18	0	C02CA Alpha-adrenoreceptor antagonists	0.267
p1yr	D	C02CA	138	9	350934	11602	-0.3914	0.6761	0.338026	1.35247	0.27	0	C02CA Alpha-adrenoreceptor antagonists	0.465
p1yr	D	C02CA	142	5	356552	5984	-0.3097	0.7337	0.295932	1.81882	0.5	0	C02CA Alpha-adrenoreceptor antagonists	0.565
p1yr	E	C02CA	3387	91	354430	8106	-0.0759	0.9269	0.747166	1.14987	0.49	0	C02CA Alpha-adrenoreceptor antagonists	0.664
p1yr	E	C02CA	3408	70	356552	5984	-0.0406	0.9603	0.752482	1.22539	0.74	0	C02CA Alpha-adrenoreceptor antagonists	0.792
p1yr	E	C02CA	3336	142	350934	11602	0.0302	1.0307	0.86405	1.2294	0.74	0	C02CA Alpha-adrenoreceptor antagonists	0.828
p1yr	E	C02CA	3372	106	353379	9157	-0.0367	0.9639	0.788468	1.17847	0.72	0	C02CA Alpha-adrenoreceptor antagonists	0.854
p1yr	F	C02CA	3408	70	23968	710	-0.2146	0.8069	0.624911	1.0419	0.1	0	C02CA Alpha-adrenoreceptor antagonists	0.372
p1yr	F	C02CA	3372	106	23731	947	-0.0765	0.9264	0.749062	1.14561	0.48	0	C02CA Alpha-adrenoreceptor antagonists	0.699
p1yr	F	C02CA	3387	91	23865	813	-0.0725	0.9301	0.740712	1.1679	0.53	0	C02CA Alpha-adrenoreceptor antagonists	0.741
p1yr	F	C02CA	3336	142	23425	1253	-0.045	0.956	0.793356	1.15188	0.64	0	C02CA Alpha-adrenoreceptor antagonists	0.818
p1yr	G	C02CA	1138	33	23968	710	-0.3188	0.727	0.505261	1.04615	0.086	0	C02CA Alpha-adrenoreceptor antagonists	0.255
p1yr	G	C02CA	1122	49	23731	947	-0.2037	0.8157	0.601754	1.10576	0.19	0	C02CA Alpha-adrenoreceptor antagonists	0.502
p1yr	G	C02CA	1127	44	23865	813	-0.1532	0.8579	0.623172	1.18115	0.35	0	C02CA Alpha-adrenoreceptor antagonists	0.6
p1yr	G	C02CA	1100	71	23425	1253	-0.0965	0.908	0.700734	1.17668	0.47	0	C02CA Alpha-adrenoreceptor antagonists	0.746
p1yr	H	C02CA	142	5	23731	947	-0.7637	0.466	0.187248	1.15952	0.1	0	C02CA Alpha-adrenoreceptor antagonists	0.263
p1yr	H	C02CA	142	5	23865	813	-0.5977	0.5501	0.220809	1.37044	0.2	0	C02CA Alpha-adrenoreceptor antagonists	0.371
p1yr	H	C02CA	142	5	23968	710	-0.4245	0.6541	0.261937	1.63342	0.36	0	C02CA Alpha-adrenoreceptor antagonists	0.476
p1yr	H	C02CA	138	9	23425	1253	-0.488	0.6139	0.303755	1.24054	0.17	0	C02CA Alpha-adrenoreceptor antagonists	0.502
p1yr	C	C02DB	1165	6	362349	187	1.3876	4.0053	1.74504	9.19313	0.0011	-1	C02DB Hydrazinophthalazine derivatives [DG:DG02046]	0.00453
p1yr	E	C02DB	3471	7	362349	187	1.0378	2.8231	1.31454	6.0627	0.0078	-1	C02DB Hydrazinophthalazine derivatives [DG:DG02046]	0.0276
p1yr	E	C02DB	3473	5	362401	135	1.0057	2.7338	1.10799	6.74526	0.029	-1	C02DB Hydrazinophthalazine derivatives [DG:DG02046]	0.0785
p1yr	F	C02DB	3471	7	24646	32	0.6198	1.8586	0.804401	4.29445	0.15	0	C02DB Hydrazinophthalazine derivatives [DG:DG02046]	0.351
p1yr	F	C02DB	3473	5	24656	22	0.6325	1.8823	0.695925	5.0913	0.21	0	C02DB Hydrazinophthalazine derivatives [DG:DG02046]	0.471
p1yr	G	C02DB	1165	6	24646	32	0.958	2.6065	1.05506	6.43942	0.038	-1	C02DB Hydrazinophthalazine derivatives [DG:DG02046]	0.287
p1yr	A	C03AA	1116	55	2221	86	-0.3371	0.7138	0.489006	1.04211	0.081	0	C03AA Thiazides, plain [DG:DG01749]	0.292
p1yr	A	C03AA	1133	38	2246	61	-0.3354	0.7151	0.457776	1.11703	0.14	0	C03AA Thiazides, plain [DG:DG01749]	0.327
p1yr	A	C03AA	1123	48	2235	72	-0.2658	0.7666	0.511363	1.14929	0.2	0	C03AA Thiazides, plain [DG:DG01749]	0.405
p1yr	A	C03AA	1074	97	2189	118	-0.0505	0.9508	0.698177	1.29473	0.75	0	C03AA Thiazides, plain [DG:DG01749]	0.869
p1yr	B	C03AA	139	8	3219	112	-0.07	0.9324	0.424965	2.04559	0.86	0	C03AA Thiazides, plain [DG:DG01749]	0.912
p1yr	B	C03AA	137	10	3200	131	-0.0752	0.9275	0.452714	1.90027	0.84	0	C03AA Thiazides, plain [DG:DG01749]	0.913
p1yr	B	C03AA	129	18	3134	197	0.0675	1.0699	0.604707	1.89287	0.82	0	C03AA Thiazides, plain [DG:DG01749]	0.916
p1yr	B	C03AA	140	7	3239	92	0.0394	1.0402	0.449298	2.40826	0.93	0	C03AA Thiazides, plain [DG:DG01749]	0.955
p1yr	C	C03AA	1116	55	346018	16518	-0.35	0.7047	0.532919	0.931912	0.014	1	C03AA Thiazides, plain [DG:DG01749]	0.0385
p1yr	C	C03AA	1123	48	347792	14744	-0.3533	0.7024	0.521825	0.945336	0.02	1	C03AA Thiazides, plain [DG:DG01749]	0.0435
p1yr	C	C03AA	1133	38	351906	10630	-0.2502	0.7787	0.559408	1.08382	0.14	0	C03AA Thiazides, plain [DG:DG01749]	0.192
p1yr	C	C03AA	1074	97	340919	21617	-0.0538	0.9476	0.760965	1.17998	0.63	0	C03AA Thiazides, plain [DG:DG01749]	0.769
p1yr	D	C03AA	139	8	347792	14744	-0.3918	0.6759	0.326081	1.40082	0.29	0	C03AA Thiazides, plain [DG:DG01749]	0.397
p1yr	D	C03AA	137	10	346018	16518	-0.3122	0.7319	0.378461	1.41527	0.35	0	C03AA Thiazides, plain [DG:DG01749]	0.461
p1yr	D	C03AA	140	7	351906	10630	-0.1847	0.8314	0.383468	1.80241	0.64	0	C03AA Thiazides, plain [DG:DG01749]	0.713
p1yr	D	C03AA	129	18	340919	21617	-0.0285	0.9719	0.580522	1.62716	0.91	0	C03AA Thiazides, plain [DG:DG01749]	0.973
p1yr	E	C03AA	3358	120	347792	14744	-0.2098	0.8107	0.671105	0.979438	0.03	1	C03AA Thiazides, plain [DG:DG01749]	0.0767
p1yr	E	C03AA	3337	141	346018	16518	-0.1659	0.8471	0.710447	1.01012	0.065	0	C03AA Thiazides, plain [DG:DG01749]	0.148
p1yr	E	C03AA	3379	99	351906	10630	-0.0614	0.9404	0.765035	1.15598	0.56	0	C03AA Thiazides, plain [DG:DG01749]	0.627
p1yr	E	C03AA	3263	215	340919	21617	-0.0099	0.9902	0.854766	1.14706	0.9	0	C03AA Thiazides, plain [DG:DG01749]	0.943
p1yr	F	C03AA	3263	215	22967	1711	0.1335	1.1428	0.977413	1.33629	0.094	0	C03AA Thiazides, plain [DG:DG01749]	0.283
p1yr	F	C03AA	3358	120	23657	1021	0.0628	1.0648	0.871101	1.3016	0.54	0	C03AA Thiazides, plain [DG:DG01749]	0.745
p1yr	F	C03AA	3337	141	23457	1221	0.0416	1.0425	0.865044	1.25628	0.66	0	C03AA Thiazides, plain [DG:DG01749]	0.83
p1yr	F	C03AA	3379	99	23809	869	0.0211	1.0214	0.820668	1.27117	0.85	0	C03AA Thiazides, plain [DG:DG01749]	0.941
p1yr	G	C03AA	1133	38	23809	869	-0.1529	0.8582	0.61185	1.20374	0.38	0	C03AA Thiazides, plain [DG:DG01749]	0.589
p1yr	G	C03AA	1116	55	23457	1221	-0.14	0.8694	0.653065	1.15737	0.34	0	C03AA Thiazides, plain [DG:DG01749]	0.637
p1yr	G	C03AA	1074	97	22967	1711	0.0954	1.1001	0.877996	1.37834	0.41	0	C03AA Thiazides, plain [DG:DG01749]	0.722
p1yr	G	C03AA	1123	48	23657	1021	-0.0777	0.9252	0.682312	1.25467	0.62	0	C03AA Thiazides, plain [DG:DG01749]	0.802
p1yr	H	C03AA	139	8	23657	1021	-0.1374	0.8717	0.417927	1.81799	0.71	0	C03AA Thiazides, plain [DG:DG01749]	0.781
p1yr	H	C03AA	137	10	23457	1221	-0.1214	0.8857	0.45514	1.72357	0.72	0	C03AA Thiazides, plain [DG:DG01749]	0.847
p1yr	H	C03AA	129	18	22967	1711	0.1085	1.1146	0.6611	1.87921	0.68	0	C03AA Thiazides, plain [DG:DG01749]	0.852
p1yr	H	C03AA	140	7	23809	869	-0.0753	0.9275	0.424841	2.02484	0.85	0	C03AA Thiazides, plain [DG:DG01749]	0.872
p1yr	A	C03BA	1140	31	2277	30	0.3541	1.4249	0.827328	2.4542	0.2	0	C03BA Sulfonamides, plain	0.373
p1yr	A	C03BA	1098	73	2235	72	0.259	1.2957	0.90272	1.85969	0.16	0	C03BA Sulfonamides, plain	0.427
p1yr	A	C03BA	1133	38	2269	38	0.2946	1.3426	0.825003	2.1847	0.24	0	C03BA Sulfonamides, plain	0.442
p1yr	A	C03BA	1123	48	2259	48	0.2292	1.2576	0.809407	1.95385	0.31	0	C03BA Sulfonamides, plain	0.533
p1yr	B	C03BA	138	9	3279	52	0.9691	2.6355	1.17309	5.92084	0.019	-1	C03BA Sulfonamides, plain	0.0636
p1yr	B	C03BA	138	9	3264	67	0.6617	1.9381	0.882938	4.25427	0.099	0	C03BA Sulfonamides, plain	0.275
p1yr	B	C03BA	132	15	3201	130	0.4392	1.5515	0.834807	2.88344	0.17	0	C03BA Sulfonamides, plain	0.502
p1yr	B	C03BA	137	10	3245	86	0.4149	1.5142	0.72135	3.17838	0.27	0	C03BA Sulfonamides, plain	0.529
p1yr	C	C03BA	1098	73	350062	12474	0.2289	1.2572	0.984789	1.60507	0.066	0	C03BA Sulfonamides, plain	0.144
p1yr	C	C03BA	1140	31	356926	5610	0.1623	1.1762	0.818504	1.69024	0.38	0	C03BA Sulfonamides, plain	0.457
p1yr	C	C03BA	1123	48	353261	9275	0.111	1.1174	0.831926	1.50084	0.46	0	C03BA Sulfonamides, plain	0.581
p1yr	C	C03BA	1133	38	354641	7895	0.0338	1.0344	0.744401	1.43733	0.84	0	C03BA Sulfonamides, plain	0.878
p1yr	D	C03BA	138	9	356926	5610	0.8878	2.4298	1.22266	4.82883	0.011	-1	C03BA Sulfonamides, plain	0.0204
p1yr	D	C03BA	132	15	350062	12474	0.5203	1.6825	0.9706	2.91653	0.064	0	C03BA Sulfonamides, plain	0.175
p1yr	D	C03BA	138	9	354641	7895	0.5466	1.7274	0.869048	3.43343	0.12	0	C03BA Sulfonamides, plain	0.209
p1yr	D	C03BA	137	10	353261	9275	0.4689	1.5982	0.830073	3.07726	0.16	0	C03BA Sulfonamides, plain	0.258
p1yr	E	C03BA	3333	145	350062	12474	0.109	1.1152	0.939269	1.324	0.21	0	C03BA Sulfonamides, plain	0.356
p1yr	E	C03BA	3402	76	354641	7895	-0.104	0.9012	0.714828	1.1362	0.38	0	C03BA Sulfonamides, plain	0.559
p1yr	E	C03BA	3382	96	353261	9275	-0.0225	0.9777	0.794521	1.20317	0.83	0	C03BA Sulfonamides, plain	0.923
p1yr	E	C03BA	3417	61	356926	5610	0.0158	1.0159	0.785081	1.31453	0.91	0	C03BA Sulfonamides, plain	0.924
p1yr	F	C03BA	3417	61	24096	582	-0.1755	0.839	0.639319	1.10105	0.21	0	C03BA Sulfonamides, plain	0.575
p1yr	F	C03BA	3402	76	24000	678	-0.1106	0.8953	0.700375	1.14455	0.38	0	C03BA Sulfonamides, plain	0.629
p1yr	F	C03BA	3382	96	23830	848	-0.0905	0.9135	0.733052	1.13839	0.42	0	C03BA Sulfonamides, plain	0.662
p1yr	F	C03BA	3333	145	23471	1207	-0.0016	0.9984	0.831743	1.19838	0.99	0	C03BA Sulfonamides, plain	0.994
p1yr	G	C03BA	1098	73	23471	1207	0.1226	1.1304	0.878458	1.45454	0.34	0	C03BA Sulfonamides, plain	0.645
p1yr	G	C03BA	1123	48	23830	848	0.0495	1.0508	0.77527	1.42414	0.75	0	C03BA Sulfonamides, plain	0.893
p1yr	G	C03BA	1133	38	24000	678	0.0497	1.051	0.749041	1.47459	0.77	0	C03BA Sulfonamides, plain	0.907
p1yr	G	C03BA	1140	31	24096	582	0.0004	1.0004	0.68932	1.45188	1	0	C03BA Sulfonamides, plain	1
p1yr	H	C03BA	138	9	24096	582	0.7892	2.2016	1.09807	4.41422	0.026	-1	C03BA Sulfonamides, plain	0.0699
p1yr	H	C03BA	138	9	24000	678	0.6136	1.8471	0.922272	3.69935	0.083	0	C03BA Sulfonamides, plain	0.191
p1yr	H	C03BA	132	15	23471	1207	0.4075	1.5031	0.857971	2.63315	0.15	0	C03BA Sulfonamides, plain	0.465
p1yr	H	C03BA	137	10	23830	848	0.3895	1.4763	0.759671	2.86901	0.25	0	C03BA Sulfonamides, plain	0.481
p1yr	A	C03CA	1048	123	2240	67	0.6195	1.858	1.32921	2.59728	0.00029	-1	C03CA Sulfonamides, plain	0.0034
p1yr	A	C03CA	1069	102	2254	53	0.6064	1.8339	1.26656	2.65535	0.0013	-1	C03CA Sulfonamides, plain	0.0101
p1yr	A	C03CA	1028	143	2215	92	0.4846	1.6236	1.20118	2.19447	0.0016	-1	C03CA Sulfonamides, plain	0.0255
p1yr	A	C03CA	1000	171	2179	128	0.369	1.4463	1.10366	1.89529	0.0075	-1	C03CA Sulfonamides, plain	0.106
p1yr	B	C03CA	127	20	3196	135	0.2119	1.236	0.697911	2.18889	0.47	0	C03CA Sulfonamides, plain	0.593
p1yr	B	C03CA	120	27	3123	208	0.1525	1.1647	0.705952	1.92153	0.55	0	C03CA Sulfonamides, plain	0.764
p1yr	B	C03CA	124	23	3164	167	0.1226	1.1304	0.663666	1.92543	0.65	0	C03CA Sulfonamides, plain	0.773
p1yr	B	C03CA	117	30	3062	269	0.0328	1.0333	0.639516	1.66954	0.89	0	C03CA Sulfonamides, plain	0.951
p1yr	C	C03CA	1069	102	355361	7175	0.7549	2.1274	1.69797	2.66548	5.3e-11	-1	C03CA Sulfonamides, plain	3.26e-10
p1yr	C	C03CA	1028	143	349887	12649	0.6274	1.8727	1.53788	2.2803	4.3e-10	-1	C03CA Sulfonamides, plain	5.54e-09
p1yr	C	C03CA	1048	123	352386	10150	0.6455	1.907	1.54715	2.35059	1.4e-09	-1	C03CA Sulfonamides, plain	1.18e-08
p1yr	C	C03CA	1000	171	344615	17921	0.4988	1.6467	1.36944	1.98002	1.1e-07	-1	C03CA Sulfonamides, plain	1.49e-06
p1yr	D	C03CA	127	20	355361	7175	0.6956	2.0049	1.18928	3.37971	0.009	-1	C03CA Sulfonamides, plain	0.0175
p1yr	D	C03CA	120	27	349887	12649	0.5366	1.7102	1.07207	2.72805	0.024	-1	C03CA Sulfonamides, plain	0.0558
p1yr	D	C03CA	124	23	352386	10150	0.529	1.6973	1.03511	2.78309	0.036	-1	C03CA Sulfonamides, plain	0.0682
p1yr	D	C03CA	117	30	344615	17921	0.3257	1.385	0.882441	2.17368	0.16	0	C03CA Sulfonamides, plain	0.348
p1yr	E	C03CA	3243	235	349887	12649	0.4846	1.6235	1.40265	1.87912	8.3e-11	-1	C03CA Sulfonamides, plain	1.38e-09
p1yr	E	C03CA	3323	155	355361	7175	0.5689	1.7664	1.48226	2.10499	2e-10	-1	C03CA Sulfonamides, plain	1.46e-09
p1yr	E	C03CA	3179	299	344615	17921	0.3916	1.4793	1.29605	1.68845	6.5e-09	-1	C03CA Sulfonamides, plain	1.02e-07
p1yr	E	C03CA	3288	190	352386	10150	0.4525	1.5722	1.33941	1.84556	3.1e-08	-1	C03CA Sulfonamides, plain	2.91e-07
p1yr	F	C03CA	3179	299	21905	2773	-0.0636	0.9384	0.818666	1.07565	0.36	0	C03CA Sulfonamides, plain	0.592
p1yr	F	C03CA	3323	155	23198	1480	-0.0771	0.9258	0.773125	1.10855	0.4	0	C03CA Sulfonamides, plain	0.716
p1yr	F	C03CA	3288	190	22902	1776	-0.0494	0.9518	0.807425	1.12192	0.56	0	C03CA Sulfonamides, plain	0.759
p1yr	F	C03CA	3243	235	22560	2118	-0.0131	0.987	0.849024	1.14746	0.86	0	C03CA Sulfonamides, plain	0.923
p1yr	G	C03CA	1048	123	22902	1776	0.1862	1.2046	0.97746	1.48459	0.081	0	C03CA Sulfonamides, plain	0.285
p1yr	G	C03CA	1028	143	22560	2118	0.1691	1.1843	0.972336	1.44244	0.093	0	C03CA Sulfonamides, plain	0.327
p1yr	G	C03CA	1069	102	23198	1480	0.1505	1.1624	0.926893	1.4578	0.19	0	C03CA Sulfonamides, plain	0.394
p1yr	G	C03CA	1000	171	21905	2773	0.0737	1.0765	0.895255	1.29445	0.43	0	C03CA Sulfonamides, plain	0.731
p1yr	H	C03CA	127	20	23198	1480	0.183	1.2008	0.719054	2.00531	0.48	0	C03CA Sulfonamides, plain	0.594
p1yr	H	C03CA	124	23	22902	1776	0.1455	1.1566	0.713644	1.87458	0.56	0	C03CA Sulfonamides, plain	0.656
p1yr	H	C03CA	120	27	22560	2118	0.1316	1.1406	0.721077	1.80435	0.57	0	C03CA Sulfonamides, plain	0.747
p1yr	H	C03CA	117	30	21905	2773	-0.0623	0.9396	0.603569	1.4626	0.78	0	C03CA Sulfonamides, plain	0.912
p1yr	A	C03DA	1147	24	2290	17	0.3628	1.4374	0.734043	2.81455	0.29	0	C03DA Aldosterone antagonists	0.461
p1yr	A	C03DA	1136	35	2281	26	0.2886	1.3345	0.770577	2.31123	0.3	0	C03DA Aldosterone antagonists	0.526
p1yr	A	C03DA	1145	26	2286	21	0.243	1.2751	0.684587	2.37484	0.44	0	C03DA Aldosterone antagonists	0.627
p1yr	A	C03DA	1132	39	2272	35	0.0669	1.0692	0.64816	1.76358	0.79	0	C03DA Aldosterone antagonists	0.883
p1yr	B	C03DA	142	5	3262	69	-0.3884	0.6782	0.250665	1.83475	0.44	0	C03DA Aldosterone antagonists	0.758
p1yr	C	C03DA	1136	35	358762	3774	0.287	1.3324	0.937627	1.8935	0.11	0	C03DA Aldosterone antagonists	0.194
p1yr	C	C03DA	1147	24	360011	2525	0.2791	1.322	0.868069	2.01325	0.19	0	C03DA Aldosterone antagonists	0.248
p1yr	C	C03DA	1132	39	357868	4668	0.1829	1.2006	0.859801	1.67661	0.28	0	C03DA Aldosterone antagonists	0.412
p1yr	C	C03DA	1145	26	359168	3368	0.0785	1.0817	0.722658	1.619	0.7	0	C03DA Aldosterone antagonists	0.794
p1yr	D	C03DA	142	5	357868	4668	-0.3134	0.7309	0.289034	1.8485	0.51	0	C03DA Aldosterone antagonists	0.68
p1yr	E	C03DA	3404	74	357868	4668	0.2284	1.2566	0.988378	1.59759	0.062	0	C03DA Aldosterone antagonists	0.145
p1yr	E	C03DA	3417	61	358762	3774	0.2382	1.269	0.975541	1.65061	0.076	0	C03DA Aldosterone antagonists	0.167
p1yr	E	C03DA	3437	41	360011	2525	0.2237	1.2507	0.909838	1.71937	0.17	0	C03DA Aldosterone antagonists	0.236
p1yr	E	C03DA	3431	47	359168	3368	0.0721	1.0748	0.798445	1.44671	0.63	0	C03DA Aldosterone antagonists	0.779
p1yr	F	C03DA	3431	47	24122	556	-0.3901	0.677	0.498038	0.920272	0.013	1	C03DA Aldosterone antagonists	0.0975
p1yr	F	C03DA	3437	41	24205	473	-0.3642	0.6948	0.500198	0.965043	0.03	1	C03DA Aldosterone antagonists	0.185
p1yr	F	C03DA	3404	74	23906	772	-0.2487	0.7798	0.607783	1.00058	0.051	0	C03DA Aldosterone antagonists	0.212
p1yr	F	C03DA	3417	61	24033	645	-0.2633	0.7685	0.585079	1.00945	0.058	0	C03DA Aldosterone antagonists	0.219
p1yr	G	C03DA	1145	26	24122	556	-0.306	0.7364	0.489536	1.10775	0.14	0	C03DA Aldosterone antagonists	0.381
p1yr	G	C03DA	1132	39	23906	772	-0.23	0.7946	0.566116	1.11519	0.18	0	C03DA Aldosterone antagonists	0.521
p1yr	G	C03DA	1147	24	24205	473	-0.2237	0.7996	0.522375	1.22385	0.3	0	C03DA Aldosterone antagonists	0.547
p1yr	G	C03DA	1136	35	24033	645	-0.152	0.859	0.601122	1.22753	0.4	0	C03DA Aldosterone antagonists	0.692
p1yr	H	C03DA	142	5	23906	772	-0.7234	0.4851	0.191199	1.2308	0.13	0	C03DA Aldosterone antagonists	0.436
p1yr	C	C03DB	1165	6	362206	330	1.0586	2.8824	1.26973	6.54317	0.011	-1	C03DB Other potassium-sparing agents	0.0318
p1yr	E	C03DB	3470	8	362206	330	0.7101	2.0341	1.00033	4.13632	0.05	-1	C03DB Other potassium-sparing agents	0.126
p1yr	F	C03DB	3470	8	24627	51	0.3956	1.4853	0.695363	3.17262	0.31	0	C03DB Other potassium-sparing agents	0.542
p1yr	G	C03DB	1165	6	24627	51	0.7021	2.0179	0.851017	4.78495	0.11	0	C03DB Other potassium-sparing agents	0.424
p1yr	E	C03EB	3473	5	362299	237	0.6275	1.873	0.768323	4.5659	0.17	0	C03EB High-ceiling diuretics and potassium-sparing agents	0.236
p1yr	E	C03EB	3471	7	362117	419	0.4334	1.5425	0.727599	3.27028	0.26	0	C03EB High-ceiling diuretics and potassium-sparing agents	0.41
p1yr	E	C03EB	3473	5	362194	342	0.2784	1.321	0.543926	3.2081	0.54	0	C03EB High-ceiling diuretics and potassium-sparing agents	0.698
p1yr	E	C03EB	3470	8	361858	678	0.0348	1.0354	0.513304	2.08843	0.92	0	C03EB High-ceiling diuretics and potassium-sparing agents	0.943
p1yr	F	C03EB	3470	8	24586	92	-0.249	0.7795	0.374873	1.62104	0.51	0	C03EB High-ceiling diuretics and potassium-sparing agents	0.733
p1yr	F	C03EB	3473	5	24645	33	0.3111	1.3649	0.524844	3.54951	0.52	0	C03EB High-ceiling diuretics and potassium-sparing agents	0.826
p1yr	F	C03EB	3471	7	24623	55	0.1574	1.1705	0.526561	2.60178	0.7	0	C03EB High-ceiling diuretics and potassium-sparing agents	0.85
p1yr	F	C03EB	3473	5	24637	41	0.082	1.0854	0.422596	2.78788	0.86	0	C03EB High-ceiling diuretics and potassium-sparing agents	0.913
p1yr	A	C05AE	1161	10	2294	13	0.1811	1.1985	0.49254	2.91666	0.69	0	C05AE Muscle relaxants	0.829
p1yr	C	C05AE	1161	10	359640	2896	-0.3656	0.6938	0.369851	1.30143	0.26	0	C05AE Muscle relaxants	0.402
p1yr	E	C05AE	3455	23	359640	2896	-0.4038	0.6678	0.441241	1.0106	0.056	0	C05AE Muscle relaxants	0.137
p1yr	E	C05AE	3471	7	361552	984	-0.4929	0.6108	0.289798	1.28753	0.2	0	C05AE Muscle relaxants	0.351
p1yr	E	C05AE	3473	5	362134	402	0.054	1.0555	0.435466	2.55826	0.91	0	C05AE Muscle relaxants	0.97
p1yr	F	C05AE	3455	23	24346	332	-0.7025	0.4954	0.322449	0.760989	0.0013	1	C05AE Muscle relaxants	0.0194
p1yr	F	C05AE	3471	7	24532	146	-1.1182	0.3269	0.152141	0.702295	0.0042	1	C05AE Muscle relaxants	0.051
p1yr	F	C05AE	3473	5	24603	75	-0.8384	0.4324	0.173091	1.08024	0.073	0	C05AE Muscle relaxants	0.277
p1yr	G	C05AE	1161	10	24346	332	-0.6455	0.5244	0.277194	0.992153	0.047	1	C05AE Muscle relaxants	0.318
p1yr	A	C05AX	1150	21	2280	27	0.0732	1.0759	0.575889	2.00999	0.82	0	C05AX Other agents for treatment of hemorrhoids and anal fissures for topical use	0.879
p1yr	A	C05AX	1087	84	2167	140	-0.0387	0.962	0.709721	1.30409	0.8	0	C05AX Other agents for treatment of hemorrhoids and anal fissures for topical use	0.89
p1yr	A	C05AX	1134	37	2252	55	0.0234	1.0237	0.647408	1.61868	0.92	0	C05AX Other agents for treatment of hemorrhoids and anal fissures for topical use	0.945
p1yr	A	C05AX	1159	12	2292	15	0.0174	1.0175	0.444896	2.32721	0.97	0	C05AX Other agents for treatment of hemorrhoids and anal fissures for topical use	0.991
p1yr	B	C05AX	139	8	3247	84	0.6689	1.952	0.862162	4.41945	0.11	0	C05AX Other agents for treatment of hemorrhoids and anal fissures for topical use	0.314
p1yr	B	C05AX	135	12	3119	212	-0.0042	0.9958	0.515709	1.92279	0.99	0	C05AX Other agents for treatment of hemorrhoids and anal fissures for topical use	0.99
p1yr	C	C05AX	1159	12	361397	1139	0.8488	2.3368	1.30964	4.16941	0.0041	-1	C05AX Other agents for treatment of hemorrhoids and anal fissures for topical use	0.00801
p1yr	C	C05AX	1150	21	358881	3655	0.3092	1.3624	0.880545	2.10793	0.17	0	C05AX Other agents for treatment of hemorrhoids and anal fissures for topical use	0.258
p1yr	C	C05AX	1087	84	343070	19466	0.1334	1.1427	0.913035	1.43024	0.24	0	C05AX Other agents for treatment of hemorrhoids and anal fissures for topical use	0.381
p1yr	C	C05AX	1134	37	354705	7831	0.1804	1.1976	0.860398	1.66706	0.28	0	C05AX Other agents for treatment of hemorrhoids and anal fissures for topical use	0.398
p1yr	D	C05AX	139	8	354705	7831	0.7627	2.144	1.04296	4.40731	0.038	-1	C05AX Other agents for treatment of hemorrhoids and anal fissures for topical use	0.0809
p1yr	D	C05AX	135	12	343070	19466	0.2929	1.3403	0.738364	2.43301	0.34	0	C05AX Other agents for treatment of hemorrhoids and anal fissures for topical use	0.529
p1yr	E	C05AX	3451	27	361397	1139	0.7999	2.2253	1.51097	3.27739	5.1e-05	-1	C05AX Other agents for treatment of hemorrhoids and anal fissures for topical use	0.000173
p1yr	E	C05AX	3254	224	343070	19466	0.1241	1.1321	0.987058	1.2985	0.076	0	C05AX Other agents for treatment of hemorrhoids and anal fissures for topical use	0.169
p1yr	E	C05AX	3430	48	358881	3655	0.2211	1.2474	0.93464	1.66484	0.13	0	C05AX Other agents for treatment of hemorrhoids and anal fissures for topical use	0.259
p1yr	E	C05AX	3386	92	354705	7831	0.1308	1.1397	0.924295	1.40535	0.22	0	C05AX Other agents for treatment of hemorrhoids and anal fissures for topical use	0.365
p1yr	F	C05AX	3254	224	22700	1978	-0.2329	0.7922	0.684876	0.916364	0.0017	1	C05AX Other agents for treatment of hemorrhoids and anal fissures for topical use	0.0219
p1yr	F	C05AX	3386	92	23734	944	-0.3473	0.7066	0.567	0.88056	0.002	1	C05AX Other agents for treatment of hemorrhoids and anal fissures for topical use	0.0356
p1yr	F	C05AX	3430	48	24156	522	-0.3842	0.681	0.503665	0.920771	0.013	1	C05AX Other agents for treatment of hemorrhoids and anal fissures for topical use	0.0975
p1yr	F	C05AX	3451	27	24417	261	-0.2752	0.7594	0.507522	1.1363	0.18	0	C05AX Other agents for treatment of hemorrhoids and anal fissures for topical use	0.529
p1yr	G	C05AX	1134	37	23734	944	-0.2814	0.7547	0.538609	1.05759	0.1	0	C05AX Other agents for treatment of hemorrhoids and anal fissures for topical use	0.327
p1yr	G	C05AX	1087	84	22700	1978	-0.1971	0.8211	0.652736	1.03287	0.092	0	C05AX Other agents for treatment of hemorrhoids and anal fissures for topical use	0.419
p1yr	G	C05AX	1150	21	24156	522	-0.24	0.7867	0.504421	1.22683	0.29	0	C05AX Other agents for treatment of hemorrhoids and anal fissures for topical use	0.561
p1yr	G	C05AX	1159	12	24417	261	-0.0992	0.9056	0.50374	1.62803	0.74	0	C05AX Other agents for treatment of hemorrhoids and anal fissures for topical use	0.853
p1yr	H	C05AX	139	8	23734	944	0.2906	1.3373	0.642418	2.78372	0.44	0	C05AX Other agents for treatment of hemorrhoids and anal fissures for topical use	0.662
p1yr	H	C05AX	135	12	22700	1978	0.0067	1.0068	0.550426	1.84141	0.98	0	C05AX Other agents for treatment of hemorrhoids and anal fissures for topical use	0.99
p1yr	A	C05BA	1165	6	2291	16	-0.5781	0.561	0.205212	1.53333	0.26	0	C05BA Heparins or heparinoids for topical use	0.522
p1yr	C	C05BA	1165	6	360468	2068	-0.3026	0.7389	0.330148	1.65369	0.46	0	C05BA Heparins or heparinoids for topical use	0.598
p1yr	E	C05BA	3468	10	361802	734	0.3526	1.4228	0.760085	2.66327	0.27	0	C05BA Heparins or heparinoids for topical use	0.42
p1yr	E	C05BA	3456	22	360468	2068	0.0918	1.0961	0.717973	1.67351	0.67	0	C05BA Heparins or heparinoids for topical use	0.774
p1yr	F	C05BA	3456	22	24453	225	-0.2799	0.7559	0.483903	1.18063	0.22	0	C05BA Heparins or heparinoids for topical use	0.454
p1yr	F	C05BA	3468	10	24577	101	-0.249	0.7796	0.403281	1.50705	0.46	0	C05BA Heparins or heparinoids for topical use	0.692
p1yr	G	C05BA	1165	6	24453	225	-0.5812	0.5592	0.247275	1.26483	0.16	0	C05BA Heparins or heparinoids for topical use	0.505
p1yr	A	C07AA	1157	14	2292	15	0.6941	2.0019	0.905712	4.42471	0.086	0	C07AA Beta blocking agents, non-selective	0.239
p1yr	A	C07AA	1154	17	2280	27	0.3864	1.4716	0.762413	2.84054	0.25	0	C07AA Beta blocking agents, non-selective	0.451
p1yr	A	C07AA	1149	22	2264	43	0.2199	1.246	0.714194	2.17382	0.44	0	C07AA Beta blocking agents, non-selective	0.642
p1yr	A	C07AA	1137	34	2233	74	0.0893	1.0934	0.70226	1.70241	0.69	0	C07AA Beta blocking agents, non-selective	0.829
p1yr	B	C07AA	142	5	3228	103	0.5841	1.7933	0.662811	4.85215	0.25	0	C07AA Beta blocking agents, non-selective	0.632
p1yr	C	C07AA	1157	14	359854	2682	0.3617	1.4357	0.8442	2.44165	0.18	0	C07AA Beta blocking agents, non-selective	0.239
p1yr	C	C07AA	1154	17	358057	4479	0.0814	1.0848	0.6697	1.75718	0.74	0	C07AA Beta blocking agents, non-selective	0.81
p1yr	C	C07AA	1149	22	356198	6338	0.0493	1.0506	0.686925	1.60669	0.82	0	C07AA Beta blocking agents, non-selective	0.871
p1yr	C	C07AA	1137	34	351803	10733	-0.0242	0.9761	0.691665	1.37736	0.89	0	C07AA Beta blocking agents, non-selective	0.924
p1yr	D	C07AA	142	5	351803	10733	0.2692	1.3089	0.532052	3.22024	0.56	0	C07AA Beta blocking agents, non-selective	0.721
p1yr	E	C07AA	3449	29	359854	2682	0.046	1.0471	0.723884	1.5145	0.81	0	C07AA Beta blocking agents, non-selective	0.849
p1yr	E	C07AA	3434	44	358057	4479	-0.0472	0.9539	0.706431	1.28801	0.76	0	C07AA Beta blocking agents, non-selective	0.868
p1yr	E	C07AA	3370	108	351803	10733	-0.0111	0.9889	0.814459	1.20077	0.91	0	C07AA Beta blocking agents, non-selective	0.943
p1yr	E	C07AA	3413	65	356198	6338	0.011	1.011	0.788935	1.29566	0.93	0	C07AA Beta blocking agents, non-selective	0.957
p1yr	F	C07AA	3370	108	23752	926	-0.2496	0.7791	0.633686	0.957869	0.018	1	C07AA Beta blocking agents, non-selective	0.113
p1yr	F	C07AA	3413	65	24097	581	-0.2753	0.7594	0.583554	0.98817	0.041	1	C07AA Beta blocking agents, non-selective	0.186
p1yr	F	C07AA	3434	44	24258	420	-0.3067	0.7359	0.535685	1.01095	0.058	0	C07AA Beta blocking agents, non-selective	0.242
p1yr	F	C07AA	3449	29	24377	301	-0.3818	0.6826	0.463077	1.00619	0.054	0	C07AA Beta blocking agents, non-selective	0.295
p1yr	G	C07AA	1137	34	23752	926	-0.2181	0.8041	0.566197	1.14187	0.22	0	C07AA Beta blocking agents, non-selective	0.559
p1yr	G	C07AA	1149	22	24097	581	-0.1817	0.8338	0.540691	1.28584	0.41	0	C07AA Beta blocking agents, non-selective	0.698
p1yr	G	C07AA	1154	17	24258	420	-0.1284	0.8795	0.537642	1.43872	0.61	0	C07AA Beta blocking agents, non-selective	0.8
p1yr	G	C07AA	1157	14	24377	301	-0.0092	0.9908	0.575589	1.70551	0.97	0	C07AA Beta blocking agents, non-selective	0.982
p1yr	H	C07AA	142	5	23752	926	0.1516	1.1637	0.469402	2.88498	0.74	0	C07AA Beta blocking agents, non-selective	0.882
p1yr	A	C07AB	932	239	2044	263	0.0839	1.0875	0.866647	1.3647	0.47	0	C07AB Beta blocking agents, selective	0.68
p1yr	A	C07AB	984	187	2098	209	0.0368	1.0375	0.812454	1.32477	0.77	0	C07AB Beta blocking agents, selective	0.853
p1yr	A	C07AB	972	199	2081	226	0.0206	1.0208	0.803813	1.29635	0.87	0	C07AB Beta blocking agents, selective	0.928
p1yr	A	C07AB	1011	160	2124	183	0.0132	1.0133	0.785006	1.30807	0.92	0	C07AB Beta blocking agents, selective	0.947
p1yr	B	C07AB	114	33	3021	310	0.403	1.4964	0.946276	2.36623	0.085	0	C07AB Beta blocking agents, selective	0.187
p1yr	B	C07AB	110	37	2943	388	0.2373	1.2678	0.811145	1.98169	0.3	0	C07AB Beta blocking agents, selective	0.556
p1yr	B	C07AB	113	34	2969	362	0.1712	1.1867	0.751326	1.8745	0.46	0	C07AB Beta blocking agents, selective	0.613
p1yr	B	C07AB	104	43	2872	459	0.2502	1.2843	0.834395	1.97678	0.26	0	C07AB Beta blocking agents, selective	0.632
p1yr	C	C07AB	984	187	323369	39167	-0.2053	0.8144	0.680751	0.974388	0.025	1	C07AB Beta blocking agents, selective	0.0503
p1yr	C	C07AB	972	199	320790	41746	-0.1941	0.8236	0.690731	0.981982	0.031	1	C07AB Beta blocking agents, selective	0.071
p1yr	C	C07AB	932	239	315099	47437	-0.0859	0.9176	0.775951	1.08521	0.32	0	C07AB Beta blocking agents, selective	0.452
p1yr	C	C07AB	1011	160	332675	29861	-0.047	0.9541	0.792386	1.14883	0.62	0	C07AB Beta blocking agents, selective	0.682
p1yr	D	C07AB	114	33	332675	29861	0.173	1.1889	0.777462	1.81793	0.42	0	C07AB Beta blocking agents, selective	0.504
p1yr	D	C07AB	113	34	323369	39167	-0.1617	0.8507	0.554711	1.30459	0.46	0	C07AB Beta blocking agents, selective	0.529
p1yr	D	C07AB	110	37	320790	41746	-0.1074	0.8982	0.590956	1.36521	0.61	0	C07AB Beta blocking agents, selective	0.685
p1yr	D	C07AB	104	43	315099	47437	-0.0708	0.9316	0.618949	1.40223	0.73	0	C07AB Beta blocking agents, selective	0.842
p1yr	E	C07AB	3082	396	323369	39167	-0.1304	0.8777	0.778208	0.990005	0.034	1	C07AB Beta blocking agents, selective	0.086
p1yr	E	C07AB	3053	425	320790	41746	-0.115	0.8914	0.792769	1.00228	0.055	0	C07AB Beta blocking agents, selective	0.127
p1yr	E	C07AB	2976	502	315099	47437	-0.0505	0.9508	0.850695	1.06263	0.37	0	C07AB Beta blocking agents, selective	0.503
p1yr	E	C07AB	3135	343	332675	29861	0.0422	1.0431	0.920538	1.18192	0.51	0	C07AB Beta blocking agents, selective	0.584
p1yr	F	C07AB	3135	343	21023	3655	-0.3107	0.7329	0.644569	0.833342	2.1e-06	1	C07AB Beta blocking agents, selective	0.000138
p1yr	F	C07AB	3053	425	20327	4351	-0.2788	0.7567	0.671498	0.852694	4.8e-06	1	C07AB Beta blocking agents, selective	0.000199
p1yr	F	C07AB	3082	396	20642	4036	-0.261	0.7703	0.681498	0.870672	3e-05	1	C07AB Beta blocking agents, selective	0.00113
p1yr	F	C07AB	2976	502	19752	4926	-0.2333	0.7919	0.707061	0.886913	5.4e-05	1	C07AB Beta blocking agents, selective	0.00191
p1yr	G	C07AB	1011	160	21023	3655	-0.3451	0.7081	0.587376	0.853732	0.0003	1	C07AB Beta blocking agents, selective	0.00332
p1yr	G	C07AB	972	199	20327	4351	-0.2904	0.7479	0.62797	0.890817	0.0011	1	C07AB Beta blocking agents, selective	0.0133
p1yr	G	C07AB	984	187	20642	4036	-0.2679	0.765	0.640181	0.914046	0.0032	1	C07AB Beta blocking agents, selective	0.0269
p1yr	G	C07AB	932	239	19752	4926	-0.2021	0.817	0.691935	0.964727	0.017	1	C07AB Beta blocking agents, selective	0.172
p1yr	H	C07AB	113	34	20642	4036	-0.1864	0.8299	0.542861	1.26876	0.39	0	C07AB Beta blocking agents, selective	0.518
p1yr	H	C07AB	110	37	20327	4351	-0.1616	0.8508	0.561403	1.2893	0.45	0	C07AB Beta blocking agents, selective	0.662
p1yr	H	C07AB	114	33	21023	3655	-0.0842	0.9192	0.600112	1.4081	0.7	0	C07AB Beta blocking agents, selective	0.738
p1yr	H	C07AB	104	43	19752	4926	-0.1007	0.9042	0.604168	1.35335	0.62	0	C07AB Beta blocking agents, selective	0.818
p1yr	A	C07AG	1162	9	2302	5	0.6927	1.9992	0.620154	6.44462	0.25	0	C07AG Alpha and beta blocking agents	0.482
p1yr	A	C07AG	1161	10	2301	6	0.6024	1.8265	0.619384	5.38597	0.28	0	C07AG Alpha and beta blocking agents	0.534
p1yr	A	C07AG	1163	8	2302	5	0.5238	1.6884	0.505429	5.6402	0.4	0	C07AG Alpha and beta blocking agents	0.554
p1yr	A	C07AG	1163	8	2302	5	0.5238	1.6884	0.505429	5.6402	0.4	0	C07AG Alpha and beta blocking agents	0.581
p1yr	C	C07AG	1163	8	362141	395	1.0277	2.7947	1.36559	5.71939	0.0049	-1	C07AG Alpha and beta blocking agents	0.00946
p1yr	C	C07AG	1161	10	361842	694	0.7818	2.1855	1.15569	4.13278	0.016	-1	C07AG Alpha and beta blocking agents	0.0442
p1yr	C	C07AG	1162	9	361968	568	0.8223	2.2757	1.16154	4.45861	0.017	-1	C07AG Alpha and beta blocking agents	0.0461
p1yr	C	C07AG	1163	8	362025	511	0.7897	2.2028	1.07996	4.49316	0.03	-1	C07AG Alpha and beta blocking agents	0.0584
p1yr	E	C07AG	3465	13	362141	395	0.8818	2.4153	1.37514	4.24235	0.0022	-1	C07AG Alpha and beta blocking agents	0.00542
p1yr	E	C07AG	3462	16	361842	694	0.5867	1.798	1.08662	2.97523	0.022	-1	C07AG Alpha and beta blocking agents	0.0655
p1yr	E	C07AG	3464	14	361968	568	0.6241	1.8666	1.0886	3.20047	0.023	-1	C07AG Alpha and beta blocking agents	0.0674
p1yr	E	C07AG	3465	13	362025	511	0.6347	1.8865	1.07766	3.30244	0.026	-1	C07AG Alpha and beta blocking agents	0.0705
p1yr	F	C07AG	3465	13	24591	87	0.1574	1.1705	0.644377	2.1262	0.6	0	C07AG Alpha and beta blocking agents	0.832
p1yr	F	C07AG	3465	13	24585	93	0.0965	1.1013	0.608318	1.99379	0.75	0	C07AG Alpha and beta blocking agents	0.865
p1yr	F	C07AG	3462	16	24557	121	0.0773	1.0804	0.633585	1.84233	0.78	0	C07AG Alpha and beta blocking agents	0.905
p1yr	F	C07AG	3464	14	24572	106	0.0639	1.066	0.602676	1.88546	0.83	0	C07AG Alpha and beta blocking agents	0.91
p1yr	G	C07AG	1163	8	24591	87	0.3363	1.3998	0.665888	2.94245	0.38	0	C07AG Alpha and beta blocking agents	0.589
p1yr	G	C07AG	1163	8	24585	93	0.2799	1.323	0.63134	2.77227	0.46	0	C07AG Alpha and beta blocking agents	0.66
p1yr	G	C07AG	1161	10	24557	121	0.3026	1.3534	0.698978	2.62037	0.37	0	C07AG Alpha and beta blocking agents	0.681
p1yr	G	C07AG	1162	9	24572	106	0.2936	1.3413	0.667862	2.69362	0.41	0	C07AG Alpha and beta blocking agents	0.698
p1yr	E	C07CB	3472	6	362216	320	0.6925	1.9987	0.887759	4.49999	0.094	0	C07CB Beta blocking agents, selective, and other diuretics	0.197
p1yr	F	C07CB	3472	6	24658	20	0.8866	2.4269	0.953875	6.1746	0.063	0	C07CB Beta blocking agents, selective, and other diuretics	0.244
p1yr	A	C08CA	936	235	1961	346	-0.1618	0.8506	0.690429	1.0479	0.13	0	C08CA Dihydropyridine derivatives [DG:DG01928]	0.333
p1yr	A	C08CA	908	263	1927	380	-0.1534	0.8578	0.700618	1.05025	0.14	0	C08CA Dihydropyridine derivatives [DG:DG01928]	0.388
p1yr	A	C08CA	968	203	2012	295	-0.1361	0.8728	0.700706	1.0871	0.23	0	C08CA Dihydropyridine derivatives [DG:DG01928]	0.413
p1yr	A	C08CA	852	319	1866	441	-0.1076	0.898	0.739656	1.09021	0.28	0	C08CA Dihydropyridine derivatives [DG:DG01928]	0.534
p1yr	B	C08CA	114	33	2783	548	-0.1204	0.8866	0.571904	1.37436	0.59	0	C08CA Dihydropyridine derivatives [DG:DG01928]	0.721
p1yr	B	C08CA	91	56	2627	704	0.131	1.14	0.772398	1.68244	0.51	0	C08CA Dihydropyridine derivatives [DG:DG01928]	0.811
p1yr	B	C08CA	115	32	2865	466	0.0467	1.0478	0.670274	1.63787	0.84	0	C08CA Dihydropyridine derivatives [DG:DG01928]	0.909
p1yr	B	C08CA	106	41	2729	602	-0.0124	0.9877	0.652963	1.49391	0.95	0	C08CA Dihydropyridine derivatives [DG:DG01928]	0.969
p1yr	C	C08CA	936	235	302198	60338	-0.2073	0.8128	0.69646	0.948459	0.0085	1	C08CA Dihydropyridine derivatives [DG:DG01928]	0.0213
p1yr	C	C08CA	908	263	296859	65677	-0.1752	0.8393	0.722791	0.974634	0.022	1	C08CA Dihydropyridine derivatives [DG:DG01928]	0.054
p1yr	C	C08CA	852	319	286290	76246	-0.1207	0.8863	0.768256	1.02239	0.098	0	C08CA Dihydropyridine derivatives [DG:DG01928]	0.188
p1yr	C	C08CA	968	203	318062	44474	0.0088	1.0088	0.858686	1.18521	0.92	0	C08CA Dihydropyridine derivatives [DG:DG01928]	0.926
p1yr	D	C08CA	114	33	302198	60338	-0.4182	0.6582	0.437869	0.989516	0.044	1	C08CA Dihydropyridine derivatives [DG:DG01928]	0.0816
p1yr	D	C08CA	106	41	296859	65677	-0.2343	0.7911	0.539214	1.16074	0.23	0	C08CA Dihydropyridine derivatives [DG:DG01928]	0.348
p1yr	D	C08CA	115	32	318062	44474	-0.0345	0.9661	0.64098	1.45601	0.87	0	C08CA Dihydropyridine derivatives [DG:DG01928]	0.87
p1yr	D	C08CA	91	56	286290	76246	0.0111	1.0111	0.704258	1.45177	0.95	0	C08CA Dihydropyridine derivatives [DG:DG01928]	0.974
p1yr	E	C08CA	2980	498	318062	44474	0.1168	1.1239	1.0145	1.24511	0.025	-1	C08CA Dihydropyridine derivatives [DG:DG01928]	0.0488
p1yr	E	C08CA	2897	581	302198	60338	-0.0828	0.9206	0.834936	1.01498	0.097	0	C08CA Dihydropyridine derivatives [DG:DG01928]	0.2
p1yr	E	C08CA	2835	643	296859	65677	-0.0615	0.9403	0.855454	1.03361	0.2	0	C08CA Dihydropyridine derivatives [DG:DG01928]	0.351
p1yr	E	C08CA	2718	760	286290	76246	-0.0379	0.9629	0.879498	1.05412	0.41	0	C08CA Dihydropyridine derivatives [DG:DG01928]	0.545
p1yr	F	C08CA	2718	760	18286	6392	-0.0595	0.9422	0.856601	1.03637	0.22	0	C08CA Dihydropyridine derivatives [DG:DG01928]	0.454
p1yr	F	C08CA	2835	643	19358	5320	-0.0434	0.9576	0.866736	1.05791	0.39	0	C08CA Dihydropyridine derivatives [DG:DG01928]	0.639
p1yr	F	C08CA	2980	498	20581	4097	-0.0397	0.9611	0.862158	1.07137	0.47	0	C08CA Dihydropyridine derivatives [DG:DG01928]	0.772
p1yr	F	C08CA	2897	581	19963	4715	-0.0217	0.9785	0.882703	1.08472	0.68	0	C08CA Dihydropyridine derivatives [DG:DG01928]	0.841
p1yr	G	C08CA	968	203	20581	4097	-0.1208	0.8862	0.751389	1.04523	0.15	0	C08CA Dihydropyridine derivatives [DG:DG01928]	0.351
p1yr	G	C08CA	908	263	19358	5320	-0.1217	0.8854	0.760689	1.03061	0.12	0	C08CA Dihydropyridine derivatives [DG:DG01928]	0.375
p1yr	G	C08CA	936	235	19963	4715	-0.111	0.895	0.764764	1.0473	0.17	0	C08CA Dihydropyridine derivatives [DG:DG01928]	0.408
p1yr	G	C08CA	852	319	18286	6392	-0.1122	0.8939	0.773288	1.03325	0.13	0	C08CA Dihydropyridine derivatives [DG:DG01928]	0.471
p1yr	H	C08CA	114	33	19963	4715	-0.2424	0.7848	0.521446	1.18109	0.24	0	C08CA Dihydropyridine derivatives [DG:DG01928]	0.411
p1yr	H	C08CA	115	32	20581	4097	-0.1016	0.9034	0.59741	1.36622	0.63	0	C08CA Dihydropyridine derivatives [DG:DG01928]	0.712
p1yr	H	C08CA	106	41	19358	5320	-0.1109	0.895	0.609539	1.31419	0.57	0	C08CA Dihydropyridine derivatives [DG:DG01928]	0.747
p1yr	H	C08CA	91	56	18286	6392	0.0668	1.0691	0.744489	1.53511	0.72	0	C08CA Dihydropyridine derivatives [DG:DG01928]	0.875
p1yr	E	C08DA	3469	9	361982	554	0.4099	1.5067	0.774887	2.92953	0.23	0	C08DA Phenylalkylamine derivatives	0.302
p1yr	E	C08DA	3466	12	361228	1308	-0.1679	0.8454	0.47682	1.49896	0.57	0	C08DA Phenylalkylamine derivatives	0.686
p1yr	E	C08DA	3467	11	361616	920	0.0909	1.0952	0.601292	1.99485	0.77	0	C08DA Phenylalkylamine derivatives	0.892
p1yr	E	C08DA	3469	9	361749	787	0.0491	1.0503	0.541513	2.03727	0.88	0	C08DA Phenylalkylamine derivatives	0.957
p1yr	F	C08DA	3466	12	24539	139	-0.3225	0.7243	0.397844	1.31879	0.29	0	C08DA Phenylalkylamine derivatives	0.519
p1yr	F	C08DA	3469	9	24595	83	-0.1365	0.8724	0.433509	1.75563	0.7	0	C08DA Phenylalkylamine derivatives	0.842
p1yr	F	C08DA	3467	11	24580	98	-0.0668	0.9354	0.496167	1.76339	0.84	0	C08DA Phenylalkylamine derivatives	0.913
p1yr	F	C08DA	3469	9	24605	73	0.002	1.0021	0.49587	2.02494	0.99	0	C08DA Phenylalkylamine derivatives	0.995
p1yr	A	C08DB	1160	11	2285	22	-0.5557	0.5737	0.267822	1.22876	0.15	0	C08DB Benzothiazepine derivatives	0.398
p1yr	A	C08DB	1161	10	2288	19	-0.5028	0.6048	0.270349	1.35328	0.22	0	C08DB Benzothiazepine derivatives	0.42
p1yr	A	C08DB	1151	20	2276	31	-0.42	0.6571	0.357518	1.20758	0.18	0	C08DB Benzothiazepine derivatives	0.454
p1yr	A	C08DB	1161	10	2294	13	-0.1996	0.8191	0.344827	1.9453	0.65	0	C08DB Benzothiazepine derivatives	0.788
p1yr	C	C08DB	1160	11	358820	3716	-0.8073	0.4461	0.244252	0.81468	0.0086	1	C08DB Benzothiazepine derivatives	0.0264
p1yr	C	C08DB	1161	10	359161	3375	-0.7835	0.4568	0.243239	0.857965	0.015	1	C08DB Benzothiazepine derivatives	0.0347
p1yr	C	C08DB	1151	20	357858	4678	-0.4475	0.6392	0.405973	1.0064	0.053	0	C08DB Benzothiazepine derivatives	0.125
p1yr	C	C08DB	1161	10	359990	2546	-0.5069	0.6024	0.320445	1.1323	0.12	0	C08DB Benzothiazepine derivatives	0.169
p1yr	E	C08DB	3445	33	358820	3716	-0.3434	0.7093	0.499562	1.00716	0.055	0	C08DB Benzothiazepine derivatives	0.127
p1yr	E	C08DB	3449	29	359161	3375	-0.36	0.6976	0.480542	1.01283	0.058	0	C08DB Benzothiazepine derivatives	0.131
p1yr	E	C08DB	3455	23	359990	2546	-0.3185	0.7273	0.478999	1.10419	0.14	0	C08DB Benzothiazepine derivatives	0.2
p1yr	E	C08DB	3427	51	357858	4678	-0.1434	0.8664	0.650959	1.15307	0.33	0	C08DB Benzothiazepine derivatives	0.472
p1yr	F	C08DB	3445	33	24244	434	-0.4188	0.6579	0.457628	0.945683	0.024	1	C08DB Benzothiazepine derivatives	0.132
p1yr	F	C08DB	3455	23	24346	332	-0.4821	0.6175	0.401198	0.950335	0.028	1	C08DB Benzothiazepine derivatives	0.185
p1yr	F	C08DB	3449	29	24302	376	-0.3783	0.685	0.465448	1.00813	0.055	0	C08DB Benzothiazepine derivatives	0.242
p1yr	F	C08DB	3427	51	24115	563	-0.2421	0.785	0.58307	1.05673	0.11	0	C08DB Benzothiazepine derivatives	0.294
p1yr	G	C08DB	1160	11	24244	434	-0.8185	0.4411	0.239949	0.81092	0.0084	1	C08DB Benzothiazepine derivatives	0.0666
p1yr	G	C08DB	1161	10	24302	376	-0.7354	0.4793	0.253227	0.907283	0.024	1	C08DB Benzothiazepine derivatives	0.127
p1yr	G	C08DB	1151	20	24115	563	-0.4886	0.6135	0.387214	0.97205	0.037	1	C08DB Benzothiazepine derivatives	0.287
p1yr	G	C08DB	1161	10	24346	332	-0.598	0.5499	0.290007	1.04269	0.067	0	C08DB Benzothiazepine derivatives	0.232
p1yr	A	C09AA	953	218	1946	361	-0.3745	0.6877	0.55517	0.85176	0.0006	1	C09AA ACE inhibitors, plain [DG:DG01501]	0.0115
p1yr	A	C09AA	893	278	1869	438	-0.3414	0.7108	0.580832	0.869791	0.00092	1	C09AA ACE inhibitors, plain [DG:DG01501]	0.0209
p1yr	A	C09AA	973	198	1982	325	-0.3287	0.7199	0.577441	0.897335	0.0035	1	C09AA ACE inhibitors, plain [DG:DG01501]	0.0338
p1yr	A	C09AA	1005	166	2030	277	-0.309	0.7342	0.581828	0.926355	0.0092	1	C09AA ACE inhibitors, plain [DG:DG01501]	0.0495
p1yr	B	C09AA	118	29	2781	550	-0.4193	0.6575	0.414475	1.04297	0.075	0	C09AA ACE inhibitors, plain [DG:DG01501]	0.242
p1yr	B	C09AA	120	27	2835	496	-0.2909	0.7476	0.466148	1.19885	0.23	0	C09AA ACE inhibitors, plain [DG:DG01501]	0.44
p1yr	B	C09AA	106	41	2656	675	-0.3005	0.7405	0.485623	1.12909	0.16	0	C09AA ACE inhibitors, plain [DG:DG01501]	0.502
p1yr	B	C09AA	123	24	2912	419	-0.1431	0.8667	0.53077	1.41527	0.57	0	C09AA ACE inhibitors, plain [DG:DG01501]	0.675
p1yr	C	C09AA	973	198	306151	56385	-0.4507	0.6372	0.540623	0.750923	7.6e-08	1	C09AA ACE inhibitors, plain [DG:DG01501]	4.54e-07
p1yr	C	C09AA	953	218	301963	60573	-0.4311	0.6498	0.554089	0.762017	1.1e-07	1	C09AA ACE inhibitors, plain [DG:DG01501]	7.31e-07
p1yr	C	C09AA	893	278	292018	70518	-0.3247	0.7227	0.622616	0.838978	2e-05	1	C09AA ACE inhibitors, plain [DG:DG01501]	0.000131
p1yr	C	C09AA	1005	166	320272	42264	-0.2798	0.756	0.635177	0.899693	0.0016	1	C09AA ACE inhibitors, plain [DG:DG01501]	0.00354
p1yr	D	C09AA	118	29	301963	60573	-0.6672	0.5131	0.335022	0.78591	0.0022	1	C09AA ACE inhibitors, plain [DG:DG01501]	0.00667
p1yr	D	C09AA	120	27	306151	56385	-0.6402	0.5272	0.340608	0.815963	0.0041	1	C09AA ACE inhibitors, plain [DG:DG01501]	0.0101
p1yr	D	C09AA	106	41	292018	70518	-0.4406	0.6437	0.437631	0.946734	0.025	1	C09AA ACE inhibitors, plain [DG:DG01501]	0.0912
p1yr	D	C09AA	123	24	320272	42264	-0.3928	0.6752	0.428568	1.06368	0.09	0	C09AA ACE inhibitors, plain [DG:DG01501]	0.122
p1yr	E	C09AA	2955	523	306151	56385	-0.2525	0.7769	0.701385	0.860506	1.3e-06	1	C09AA ACE inhibitors, plain [DG:DG01501]	8.86e-06
p1yr	E	C09AA	2899	579	301963	60573	-0.2161	0.8056	0.729777	0.889382	1.8e-05	1	C09AA ACE inhibitors, plain [DG:DG01501]	0.000115
p1yr	E	C09AA	2762	716	292018	70518	-0.1367	0.8722	0.794546	0.957513	0.0041	1	C09AA ACE inhibitors, plain [DG:DG01501]	0.0159
p1yr	E	C09AA	3035	443	320272	42264	-0.0747	0.928	0.833176	1.0336	0.17	0	C09AA ACE inhibitors, plain [DG:DG01501]	0.236
p1yr	F	C09AA	3035	443	20738	3940	-0.1763	0.8384	0.748534	0.939014	0.0023	1	C09AA ACE inhibitors, plain [DG:DG01501]	0.0412
p1yr	F	C09AA	2899	579	19775	4903	-0.1155	0.8909	0.803205	0.988251	0.029	1	C09AA ACE inhibitors, plain [DG:DG01501]	0.147
p1yr	F	C09AA	2955	523	20239	4439	-0.12	0.8869	0.796767	0.987283	0.028	1	C09AA ACE inhibitors, plain [DG:DG01501]	0.154
p1yr	F	C09AA	2762	716	18724	5954	-0.1007	0.9042	0.820035	0.997033	0.043	1	C09AA ACE inhibitors, plain [DG:DG01501]	0.196
p1yr	G	C09AA	1005	166	20738	3940	-0.3476	0.7064	0.591769	0.843122	0.00012	1	C09AA ACE inhibitors, plain [DG:DG01501]	0.00166
p1yr	G	C09AA	953	218	19775	4903	-0.2976	0.7426	0.631906	0.872607	0.0003	1	C09AA ACE inhibitors, plain [DG:DG01501]	0.00618
p1yr	G	C09AA	973	198	20239	4439	-0.2818	0.7545	0.638739	0.891145	0.00091	1	C09AA ACE inhibitors, plain [DG:DG01501]	0.0099
p1yr	G	C09AA	893	278	18724	5954	-0.2613	0.7701	0.662224	0.895466	0.00069	1	C09AA ACE inhibitors, plain [DG:DG01501]	0.0129
p1yr	H	C09AA	118	29	19775	4903	-0.5661	0.5677	0.369758	0.871675	0.0097	1	C09AA ACE inhibitors, plain [DG:DG01501]	0.0441
p1yr	H	C09AA	120	27	20239	4439	-0.5007	0.6061	0.390812	0.939932	0.025	1	C09AA ACE inhibitors, plain [DG:DG01501]	0.089
p1yr	H	C09AA	123	24	20738	3940	-0.4827	0.6171	0.390549	0.975107	0.039	1	C09AA ACE inhibitors, plain [DG:DG01501]	0.0975
p1yr	H	C09AA	106	41	18724	5954	-0.4113	0.6628	0.449394	0.977514	0.038	1	C09AA ACE inhibitors, plain [DG:DG01501]	0.196
p1yr	A	C09CA	1064	107	2127	180	-0.3732	0.6885	0.52142	0.909134	0.0085	1	C09CA Angiotensin II receptor blockers, plain [DG:DG01495]	0.0536
p1yr	A	C09CA	1076	95	2147	160	-0.3535	0.7022	0.524636	0.939886	0.018	1	C09CA Angiotensin II receptor blockers, plain [DG:DG01495]	0.0813
p1yr	A	C09CA	1048	123	2117	190	-0.3295	0.7193	0.549999	0.940652	0.016	1	C09CA Angiotensin II receptor blockers, plain [DG:DG01495]	0.133
p1yr	A	C09CA	1029	142	2096	211	-0.2911	0.7474	0.578937	0.964947	0.025	1	C09CA Angiotensin II receptor blockers, plain [DG:DG01495]	0.162
p1yr	B	C09CA	128	19	3037	294	-0.1861	0.8302	0.483577	1.4253	0.5	0	C09CA Angiotensin II receptor blockers, plain [DG:DG01495]	0.764
p1yr	B	C09CA	120	27	3005	326	0.1232	1.1312	0.699889	1.82815	0.61	0	C09CA Angiotensin II receptor blockers, plain [DG:DG01495]	0.818
p1yr	B	C09CA	131	16	3092	239	-0.074	0.9286	0.519435	1.6602	0.8	0	C09CA Angiotensin II receptor blockers, plain [DG:DG01495]	0.893
p1yr	B	C09CA	129	18	3062	269	-0.0654	0.9367	0.539106	1.62749	0.82	0	C09CA Angiotensin II receptor blockers, plain [DG:DG01495]	0.902
p1yr	C	C09CA	1064	107	331065	31471	-0.4616	0.6303	0.512191	0.775628	1.3e-05	1	C09CA Angiotensin II receptor blockers, plain [DG:DG01495]	6.33e-05
p1yr	C	C09CA	1048	123	329564	32972	-0.3647	0.6944	0.570632	0.845015	0.00027	1	C09CA Angiotensin II receptor blockers, plain [DG:DG01495]	0.00116
p1yr	C	C09CA	1029	142	326433	36103	-0.3299	0.719	0.596835	0.866221	0.00052	1	C09CA Angiotensin II receptor blockers, plain [DG:DG01495]	0.0023
p1yr	C	C09CA	1076	95	338827	23709	-0.2581	0.7725	0.621159	0.960816	0.02	1	C09CA Angiotensin II receptor blockers, plain [DG:DG01495]	0.0357
p1yr	D	C09CA	128	19	329564	32972	-0.4029	0.6684	0.405765	1.10103	0.11	0	C09CA Angiotensin II receptor blockers, plain [DG:DG01495]	0.186
p1yr	D	C09CA	129	18	331065	31471	-0.385	0.6805	0.408622	1.13315	0.14	0	C09CA Angiotensin II receptor blockers, plain [DG:DG01495]	0.223
p1yr	D	C09CA	131	16	338827	23709	-0.1991	0.8195	0.479808	1.39964	0.47	0	C09CA Angiotensin II receptor blockers, plain [DG:DG01495]	0.547
p1yr	D	C09CA	120	27	326433	36103	-0.1168	0.8898	0.573288	1.38093	0.6	0	C09CA Angiotensin II receptor blockers, plain [DG:DG01495]	0.737
p1yr	E	C09CA	3191	287	331065	31471	-0.2169	0.805	0.708189	0.915044	0.00091	1	C09CA Angiotensin II receptor blockers, plain [DG:DG01495]	0.00379
p1yr	E	C09CA	3165	313	329564	32972	-0.1733	0.8409	0.74292	0.951697	0.0061	1	C09CA Angiotensin II receptor blockers, plain [DG:DG01495]	0.0241
p1yr	E	C09CA	3125	353	326433	36103	-0.1495	0.8611	0.764937	0.969438	0.013	1	C09CA Angiotensin II receptor blockers, plain [DG:DG01495]	0.0438
p1yr	E	C09CA	3223	255	338827	23709	-0.0133	0.9868	0.86254	1.12894	0.85	0	C09CA Angiotensin II receptor blockers, plain [DG:DG01495]	0.872
p1yr	F	C09CA	3125	353	21323	3355	-0.2019	0.8172	0.721208	0.925957	0.0015	1	C09CA Angiotensin II receptor blockers, plain [DG:DG01495]	0.0212
p1yr	F	C09CA	3191	287	21932	2746	-0.198	0.8204	0.716738	0.938991	0.0041	1	C09CA Angiotensin II receptor blockers, plain [DG:DG01495]	0.0513
p1yr	F	C09CA	3165	313	21721	2957	-0.1863	0.83	0.728407	0.945803	0.0052	1	C09CA Angiotensin II receptor blockers, plain [DG:DG01495]	0.0539
p1yr	F	C09CA	3223	255	22211	2467	-0.2035	0.8159	0.708076	0.940043	0.0049	1	C09CA Angiotensin II receptor blockers, plain [DG:DG01495]	0.0704
p1yr	G	C09CA	1064	107	21932	2746	-0.4045	0.6673	0.540161	0.824405	0.00018	1	C09CA Angiotensin II receptor blockers, plain [DG:DG01495]	0.00278
p1yr	G	C09CA	1076	95	22211	2467	-0.4111	0.6629	0.530867	0.827834	0.00029	1	C09CA Angiotensin II receptor blockers, plain [DG:DG01495]	0.00332
p1yr	G	C09CA	1029	142	21323	3355	-0.3493	0.7051	0.583058	0.852802	0.00032	1	C09CA Angiotensin II receptor blockers, plain [DG:DG01495]	0.00707
p1yr	G	C09CA	1048	123	21721	2957	-0.3449	0.7083	0.57978	0.865373	0.00074	1	C09CA Angiotensin II receptor blockers, plain [DG:DG01495]	0.0109
p1yr	H	C09CA	131	16	22211	2467	-0.3078	0.7351	0.429747	1.25735	0.26	0	C09CA Angiotensin II receptor blockers, plain [DG:DG01495]	0.376
p1yr	H	C09CA	128	19	21721	2957	-0.3537	0.7021	0.425364	1.15872	0.17	0	C09CA Angiotensin II receptor blockers, plain [DG:DG01495]	0.405
p1yr	H	C09CA	129	18	21932	2746	-0.3022	0.7392	0.44331	1.23249	0.25	0	C09CA Angiotensin II receptor blockers, plain [DG:DG01495]	0.42
p1yr	H	C09CA	120	27	21323	3355	-0.0896	0.9143	0.587768	1.42213	0.69	0	C09CA Angiotensin II receptor blockers, plain [DG:DG01495]	0.856
p1yr	E	C09DA	3472	6	361898	638	-0.1998	0.8189	0.364774	1.83855	0.63	0	C09DA Angiotensin II receptor blockers (ARBs) and diuretics	0.784
p1yr	E	C09DA	3468	10	361683	853	0.0223	1.0226	0.545292	1.91765	0.94	0	C09DA Angiotensin II receptor blockers (ARBs) and diuretics	0.95
p1yr	F	C09DA	3472	6	24616	62	-0.3118	0.7322	0.311884	1.71873	0.47	0	C09DA Angiotensin II receptor blockers (ARBs) and diuretics	0.692
p1yr	F	C09DA	3468	10	24591	87	-0.0785	0.9245	0.473945	1.80341	0.82	0	C09DA Angiotensin II receptor blockers (ARBs) and diuretics	0.928
p1yr	E	C09DX	3470	8	362234	302	0.6517	1.9188	0.942073	3.90836	0.073	0	C09DX Angiotensin II receptor blockers (ARBs), other combinations	0.12
p1yr	E	C09DX	3469	9	362162	374	0.5788	1.784	0.913421	3.48417	0.09	0	C09DX Angiotensin II receptor blockers (ARBs), other combinations	0.19
p1yr	E	C09DX	3469	9	362148	388	0.5347	1.7069	0.874363	3.33225	0.12	0	C09DX Angiotensin II receptor blockers (ARBs), other combinations	0.236
p1yr	E	C09DX	3470	8	362175	361	0.489	1.6306	0.802827	3.31203	0.18	0	C09DX Angiotensin II receptor blockers (ARBs), other combinations	0.324
p1yr	F	C09DX	3470	8	24624	54	0.1173	1.1244	0.525723	2.40502	0.76	0	C09DX Angiotensin II receptor blockers (ARBs), other combinations	0.897
p1yr	F	C09DX	3469	9	24616	62	0.0726	1.0753	0.525799	2.19897	0.84	0	C09DX Angiotensin II receptor blockers (ARBs), other combinations	0.913
p1yr	F	C09DX	3469	9	24615	63	0.0639	1.066	0.521612	2.17854	0.86	0	C09DX Angiotensin II receptor blockers (ARBs), other combinations	0.943
p1yr	F	C09DX	3470	8	24617	61	-0.0299	0.9705	0.457053	2.06079	0.94	0	C09DX Angiotensin II receptor blockers (ARBs), other combinations	0.966
p1yr	A	C10AA	724	447	1543	764	-0.6655	0.514	0.427969	0.617397	1.1e-12	1	C10AA HMG CoA reductase inhibitors [DG:DG01660]	2.1e-10
p1yr	A	C10AA	752	419	1586	721	-0.6446	0.5248	0.436787	0.630667	6e-12	1	C10AA HMG CoA reductase inhibitors [DG:DG01660]	9.84e-10
p1yr	A	C10AA	656	515	1471	836	-0.5874	0.5558	0.463227	0.666745	2.6e-10	1	C10AA HMG CoA reductase inhibitors [DG:DG01660]	5.9e-08
p1yr	A	C10AA	789	382	1681	626	-0.5216	0.5936	0.493702	0.713634	2.9e-08	1	C10AA HMG CoA reductase inhibitors [DG:DG01660]	1.02e-06
p1yr	B	C10AA	77	70	2190	1141	-0.3169	0.7284	0.502295	1.05628	0.095	0	C10AA HMG CoA reductase inhibitors [DG:DG01660]	0.288
p1yr	B	C10AA	81	66	2257	1074	-0.2354	0.7902	0.544717	1.14636	0.21	0	C10AA HMG CoA reductase inhibitors [DG:DG01660]	0.42
p1yr	B	C10AA	85	62	2385	946	-0.1078	0.8978	0.618611	1.30295	0.57	0	C10AA HMG CoA reductase inhibitors [DG:DG01660]	0.675
p1yr	B	C10AA	61	86	2066	1265	-0.1338	0.8748	0.597962	1.27968	0.49	0	C10AA HMG CoA reductase inhibitors [DG:DG01660]	0.81
p1yr	C	C10AA	752	419	236230	126306	-0.7107	0.4913	0.427613	0.564441	1.1e-23	1	C10AA HMG CoA reductase inhibitors [DG:DG01660]	5.09e-22
p1yr	C	C10AA	724	447	230467	132069	-0.6952	0.499	0.434374	0.57321	8.8e-23	1	C10AA HMG CoA reductase inhibitors [DG:DG01660]	6.04e-21
p1yr	C	C10AA	656	515	219975	142561	-0.5792	0.5604	0.487823	0.643694	2.7e-16	1	C10AA HMG CoA reductase inhibitors [DG:DG01660]	1.31e-14
p1yr	C	C10AA	789	382	269137	93399	-0.2098	0.8107	0.708341	0.927899	0.0023	1	C10AA HMG CoA reductase inhibitors [DG:DG01660]	0.00471
p1yr	D	C10AA	77	70	230467	132069	-0.7996	0.4495	0.314519	0.642465	1.1e-05	1	C10AA HMG CoA reductase inhibitors [DG:DG01660]	5.79e-05
p1yr	D	C10AA	81	66	236230	126306	-0.7815	0.4577	0.320891	0.652908	1.6e-05	1	C10AA HMG CoA reductase inhibitors [DG:DG01660]	6.47e-05
p1yr	D	C10AA	61	86	219975	142561	-0.536	0.5851	0.405683	0.843804	0.0041	1	C10AA HMG CoA reductase inhibitors [DG:DG01660]	0.0175
p1yr	D	C10AA	85	62	269137	93399	-0.1904	0.8267	0.585001	1.16817	0.28	0	C10AA HMG CoA reductase inhibitors [DG:DG01660]	0.347
p1yr	E	C10AA	2338	1140	236230	126306	-0.2472	0.781	0.71771	0.84983	9.8e-09	1	C10AA HMG CoA reductase inhibitors [DG:DG01660]	1e-07
p1yr	E	C10AA	2267	1211	230467	132069	-0.221	0.8017	0.737106	0.872	2.5e-07	1	C10AA HMG CoA reductase inhibitors [DG:DG01660]	2.71e-06
p1yr	E	C10AA	2127	1351	219975	142561	-0.1529	0.8582	0.789407	0.932971	0.00033	1	C10AA HMG CoA reductase inhibitors [DG:DG01660]	0.00191
p1yr	E	C10AA	2470	1008	269137	93399	0.101	1.1063	1.01783	1.20249	0.018	-1	C10AA HMG CoA reductase inhibitors [DG:DG01660]	0.0366
p1yr	F	C10AA	2470	1008	15971	8707	-0.0753	0.9274	0.848909	1.0132	0.095	0	C10AA HMG CoA reductase inhibitors [DG:DG01660]	0.367
p1yr	F	C10AA	2338	1140	15054	9624	-0.0433	0.9576	0.877845	1.04469	0.33	0	C10AA HMG CoA reductase inhibitors [DG:DG01660]	0.589
p1yr	F	C10AA	2267	1211	14532	10146	-0.0316	0.9689	0.88847	1.0566	0.47	0	C10AA HMG CoA reductase inhibitors [DG:DG01660]	0.692
p1yr	F	C10AA	2127	1351	13493	11185	-0.0118	0.9883	0.906417	1.07749	0.79	0	C10AA HMG CoA reductase inhibitors [DG:DG01660]	0.909
p1yr	G	C10AA	724	447	14532	10146	-0.4138	0.6611	0.576575	0.758082	3.1e-09	1	C10AA HMG CoA reductase inhibitors [DG:DG01660]	2.13e-07
p1yr	G	C10AA	752	419	15054	9624	-0.4166	0.6593	0.574745	0.7562	2.6e-09	1	C10AA HMG CoA reductase inhibitors [DG:DG01660]	2.41e-07
p1yr	G	C10AA	789	382	15971	8707	-0.3742	0.6879	0.598918	0.789997	1.2e-07	1	C10AA HMG CoA reductase inhibitors [DG:DG01660]	3.87e-06
p1yr	G	C10AA	656	515	13493	11185	-0.3532	0.7025	0.612811	0.805205	4e-07	1	C10AA HMG CoA reductase inhibitors [DG:DG01660]	2.04e-05
p1yr	H	C10AA	85	62	15971	8707	-0.3379	0.7133	0.502281	1.01288	0.059	0	C10AA HMG CoA reductase inhibitors [DG:DG01660]	0.135
p1yr	H	C10AA	77	70	14532	10146	-0.4554	0.6342	0.445965	0.90195	0.011	1	C10AA HMG CoA reductase inhibitors [DG:DG01660]	0.0478
p1yr	H	C10AA	81	66	15054	9624	-0.4395	0.6444	0.453728	0.915107	0.014	1	C10AA HMG CoA reductase inhibitors [DG:DG01660]	0.0519
p1yr	H	C10AA	61	86	13493	11185	-0.2674	0.7654	0.534777	1.09543	0.14	0	C10AA HMG CoA reductase inhibitors [DG:DG01660]	0.445
p1yr	A	C10AB	1162	9	2301	6	0.2588	1.2954	0.425397	3.94487	0.65	0	C10AB Fibrates	0.761
p1yr	A	C10AB	1163	8	2302	5	0.2846	1.3292	0.409628	4.31315	0.64	0	C10AB Fibrates	0.786
p1yr	A	C10AB	1159	12	2299	8	0.2356	1.2657	0.476523	3.36168	0.64	0	C10AB Fibrates	0.798
p1yr	A	C10AB	1162	9	2300	7	0.058	1.0597	0.366366	3.06493	0.92	0	C10AB Fibrates	0.945
p1yr	C	C10AB	1162	9	360858	1678	-0.1668	0.8464	0.4359	1.64351	0.62	0	C10AB Fibrates	0.702
p1yr	C	C10AB	1159	12	360293	2243	-0.1516	0.8594	0.48302	1.52896	0.61	0	C10AB Fibrates	0.756
p1yr	C	C10AB	1163	8	361376	1160	0.0773	1.0803	0.534164	2.18488	0.83	0	C10AB Fibrates	0.855
p1yr	C	C10AB	1162	9	361021	1515	-0.0646	0.9375	0.482616	1.82095	0.85	0	C10AB Fibrates	0.883
p1yr	E	C10AB	3458	20	360293	2243	-0.3623	0.6961	0.446025	1.08637	0.11	0	C10AB Fibrates	0.221
p1yr	E	C10AB	3462	16	360858	1678	-0.3108	0.7329	0.445759	1.20486	0.22	0	C10AB Fibrates	0.365
p1yr	E	C10AB	3463	15	361021	1515	-0.2779	0.7574	0.453235	1.26554	0.29	0	C10AB Fibrates	0.45
p1yr	E	C10AB	3465	13	361376	1160	-0.1554	0.8561	0.493013	1.48653	0.58	0	C10AB Fibrates	0.638
p1yr	F	C10AB	3458	20	24418	260	-0.489	0.6132	0.385716	0.97497	0.039	1	C10AB Fibrates	0.194
p1yr	F	C10AB	3462	16	24502	176	-0.3082	0.7348	0.436052	1.23818	0.25	0	C10AB Fibrates	0.498
p1yr	F	C10AB	3463	15	24520	158	-0.2768	0.7582	0.441792	1.30111	0.32	0	C10AB Fibrates	0.589
p1yr	F	C10AB	3465	13	24538	140	-0.2574	0.7731	0.433239	1.37939	0.38	0	C10AB Fibrates	0.713
p1yr	G	C10AB	1159	12	24418	260	-0.2782	0.7572	0.419299	1.36729	0.36	0	C10AB Fibrates	0.673
p1yr	G	C10AB	1162	9	24502	176	-0.161	0.8513	0.43057	1.68314	0.64	0	C10AB Fibrates	0.845
p1yr	G	C10AB	1162	9	24520	158	-0.0597	0.942	0.475404	1.86656	0.86	0	C10AB Fibrates	0.941
p1yr	G	C10AB	1163	8	24538	140	-0.0373	0.9634	0.466349	1.99003	0.92	0	C10AB Fibrates	0.982
p1yr	A	C10AC	1163	8	2301	6	0.9472	2.5784	0.835634	7.95611	0.099	0	C10AC Bile acid sequestrants	0.36
p1yr	A	C10AC	1165	6	2302	5	0.928	2.5294	0.715374	8.9433	0.15	0	C10AC Bile acid sequestrants	0.398
p1yr	C	C10AC	1165	6	361845	691	0.7627	2.1441	0.953803	4.81976	0.065	0	C10AC Bile acid sequestrants	0.113
p1yr	C	C10AC	1165	6	361618	918	0.4369	1.5479	0.686017	3.49283	0.29	0	C10AC Bile acid sequestrants	0.404
p1yr	C	C10AC	1163	8	361194	1342	0.3323	1.3941	0.689414	2.81921	0.35	0	C10AC Bile acid sequestrants	0.481
p1yr	E	C10AC	3470	8	362130	406	0.5886	1.8015	0.891455	3.64059	0.1	0	C10AC Bile acid sequestrants	0.153
p1yr	E	C10AC	3468	10	361845	691	0.2932	1.3408	0.716042	2.51058	0.36	0	C10AC Bile acid sequestrants	0.536
p1yr	E	C10AC	3467	11	361618	918	0.1004	1.1057	0.607792	2.01132	0.74	0	C10AC Bile acid sequestrants	0.873
p1yr	E	C10AC	3464	14	361194	1342	-0.0467	0.9544	0.561742	1.62144	0.86	0	C10AC Bile acid sequestrants	0.925
p1yr	F	C10AC	3464	14	24512	166	-0.3814	0.6829	0.392629	1.18777	0.18	0	C10AC Bile acid sequestrants	0.395
p1yr	F	C10AC	3467	11	24570	108	-0.1858	0.8305	0.442316	1.55921	0.56	0	C10AC Bile acid sequestrants	0.783
p1yr	F	C10AC	3468	10	24587	91	-0.1381	0.871	0.448539	1.69129	0.68	0	C10AC Bile acid sequestrants	0.841
p1yr	F	C10AC	3470	8	24606	72	-0.1379	0.8712	0.414483	1.8312	0.72	0	C10AC Bile acid sequestrants	0.876
p1yr	G	C10AC	1165	6	24587	91	0.3486	1.4171	0.613009	3.27578	0.41	0	C10AC Bile acid sequestrants	0.627
p1yr	G	C10AC	1165	6	24570	108	0.1812	1.1987	0.521397	2.75583	0.67	0	C10AC Bile acid sequestrants	0.863
p1yr	G	C10AC	1163	8	24512	166	0.0571	1.0587	0.516613	2.16979	0.88	0	C10AC Bile acid sequestrants	0.942
p1yr	A	C10AX	1154	17	2281	26	-0.3198	0.7263	0.375721	1.40391	0.34	0	C10AX Other lipid modifying agents	0.546
p1yr	A	C10AX	1149	22	2275	32	-0.2896	0.7486	0.41623	1.34633	0.33	0	C10AX Other lipid modifying agents	0.585
p1yr	A	C10AX	1154	17	2283	24	-0.2632	0.7686	0.393322	1.50204	0.44	0	C10AX Other lipid modifying agents	0.627
p1yr	A	C10AX	1156	15	2286	21	-0.1919	0.8254	0.404656	1.68349	0.6	0	C10AX Other lipid modifying agents	0.771
p1yr	C	C10AX	1149	22	356981	5555	-0.3846	0.6807	0.442531	1.04713	0.08	0	C10AX Other lipid modifying agents	0.165
p1yr	C	C10AX	1154	17	358174	4362	-0.3846	0.6807	0.418943	1.10613	0.12	0	C10AX Other lipid modifying agents	0.209
p1yr	C	C10AX	1154	17	358628	3908	-0.2839	0.7528	0.463079	1.22386	0.25	0	C10AX Other lipid modifying agents	0.364
p1yr	C	C10AX	1156	15	359644	2892	-0.1441	0.8658	0.515865	1.45313	0.58	0	C10AX Other lipid modifying agents	0.651
p1yr	E	C10AX	3424	54	356981	5555	-0.1783	0.8367	0.635472	1.10156	0.2	0	C10AX Other lipid modifying agents	0.341
p1yr	E	C10AX	3435	43	358174	4362	-0.1638	0.8489	0.624823	1.15333	0.29	0	C10AX Other lipid modifying agents	0.443
p1yr	E	C10AX	3437	41	358628	3908	-0.1093	0.8965	0.654927	1.22713	0.49	0	C10AX Other lipid modifying agents	0.664
p1yr	E	C10AX	3442	36	359644	2892	0.0458	1.0468	0.748442	1.4642	0.79	0	C10AX Other lipid modifying agents	0.832
p1yr	F	C10AX	3424	54	24122	556	-0.2122	0.8088	0.60617	1.07913	0.15	0	C10AX Other lipid modifying agents	0.351
p1yr	F	C10AX	3435	43	24235	443	-0.1917	0.8256	0.598713	1.13845	0.24	0	C10AX Other lipid modifying agents	0.486
p1yr	F	C10AX	3437	41	24283	395	-0.1221	0.885	0.636236	1.23108	0.47	0	C10AX Other lipid modifying agents	0.696
p1yr	F	C10AX	3442	36	24333	345	-0.1054	0.9	0.633147	1.27928	0.56	0	C10AX Other lipid modifying agents	0.83
p1yr	G	C10AX	1154	17	24235	443	-0.4115	0.6627	0.404103	1.08672	0.1	0	C10AX Other lipid modifying agents	0.327
p1yr	G	C10AX	1149	22	24122	556	-0.4185	0.658	0.42425	1.0206	0.062	0	C10AX Other lipid modifying agents	0.359
p1yr	G	C10AX	1156	15	24333	345	-0.2887	0.7492	0.44198	1.27013	0.28	0	C10AX Other lipid modifying agents	0.522
p1yr	G	C10AX	1154	17	24283	395	-0.2904	0.748	0.455456	1.2283	0.25	0	C10AX Other lipid modifying agents	0.532
p1yr	A	D01AC	1009	162	2127	180	0.3292	1.3899	1.08783	1.77589	0.0085	-1	D01AC Imidazole and triazole derivatives	0.0854
p1yr	A	D01AC	1081	90	2211	96	0.2831	1.3272	0.958221	1.8382	0.088	0	D01AC Imidazole and triazole derivatives	0.262
p1yr	A	D01AC	1122	49	2261	46	0.3144	1.3694	0.880169	2.13081	0.16	0	D01AC Imidazole and triazole derivatives	0.35
p1yr	A	D01AC	877	294	1899	408	0.099	1.104	0.915383	1.33151	0.3	0	D01AC Imidazole and triazole derivatives	0.554
p1yr	B	D01AC	132	15	3251	80	0.7978	2.2207	1.16111	4.2473	0.016	-1	D01AC Imidazole and triazole derivatives	0.0616
p1yr	B	D01AC	127	20	3165	166	0.4578	1.5805	0.905334	2.75932	0.11	0	D01AC Imidazole and triazole derivatives	0.285
p1yr	B	D01AC	108	39	2668	663	-0.2358	0.7899	0.518341	1.20385	0.27	0	D01AC Imidazole and triazole derivatives	0.632
p1yr	B	D01AC	121	26	3015	316	0.1562	1.169	0.721904	1.89301	0.53	0	D01AC Imidazole and triazole derivatives	0.764
p1yr	C	D01AC	1122	49	359203	3333	1.0547	2.8711	2.13399	3.86273	3.2e-12	-1	D01AC Imidazole and triazole derivatives	2.41e-11
p1yr	C	D01AC	1009	162	337863	24673	0.4756	1.609	1.35664	1.90837	4.7e-08	-1	D01AC Imidazole and triazole derivatives	3.72e-07
p1yr	C	D01AC	1081	90	351419	11117	0.608	1.8368	1.47314	2.2903	6.6e-08	-1	D01AC Imidazole and triazole derivatives	4.21e-07
p1yr	C	D01AC	877	294	305451	57085	0.3102	1.3637	1.19005	1.56262	8e-06	-1	D01AC Imidazole and triazole derivatives	6.07e-05
p1yr	D	D01AC	132	15	359203	3333	1.8059	6.0854	3.46947	10.6736	3e-10	-1	D01AC Imidazole and triazole derivatives	1.46e-09
p1yr	D	D01AC	127	20	351419	11117	1.0778	2.9382	1.80943	4.77105	1.3e-05	-1	D01AC Imidazole and triazole derivatives	5.51e-05
p1yr	D	D01AC	121	26	337863	24673	0.5948	1.8127	1.17322	2.80061	0.0074	-1	D01AC Imidazole and triazole derivatives	0.02
p1yr	D	D01AC	108	39	305451	57085	0.2242	1.2513	0.859477	1.82178	0.24	0	D01AC Imidazole and triazole derivatives	0.431
p1yr	E	D01AC	3383	95	359203	3333	0.9168	2.5012	2.02502	3.08931	1.8e-17	-1	D01AC Imidazole and triazole derivatives	2.09e-16
p1yr	E	D01AC	3292	186	351419	11117	0.4493	1.5673	1.34689	1.82373	6.2e-09	-1	D01AC Imidazole and triazole derivatives	6.64e-08
p1yr	E	D01AC	3136	342	337863	24673	0.2925	1.3398	1.19477	1.5025	5.6e-07	-1	D01AC Imidazole and triazole derivatives	5.58e-06
p1yr	E	D01AC	2776	702	305451	57085	0.2122	1.2364	1.13522	1.34665	1.1e-06	-1	D01AC Imidazole and triazole derivatives	1.11e-05
p1yr	F	D01AC	3383	95	24055	623	0.1592	1.1725	0.936508	1.46805	0.17	0	D01AC Imidazole and triazole derivatives	0.515
p1yr	F	D01AC	2776	702	19534	5144	0.022	1.0223	0.932487	1.12067	0.64	0	D01AC Imidazole and triazole derivatives	0.818
p1yr	F	D01AC	3136	342	22167	2511	0.0227	1.0229	0.904724	1.15656	0.72	0	D01AC Imidazole and triazole derivatives	0.854
p1yr	F	D01AC	3292	186	23314	1364	0.0114	1.0115	0.860272	1.18926	0.89	0	D01AC Imidazole and triazole derivatives	0.919
p1yr	G	D01AC	1009	162	22167	2511	0.2135	1.238	1.03855	1.47576	0.017	-1	D01AC Imidazole and triazole derivatives	0.109
p1yr	G	D01AC	1122	49	24055	623	0.3393	1.404	1.03615	1.90233	0.029	-1	D01AC Imidazole and triazole derivatives	0.15
p1yr	G	D01AC	1081	90	23314	1364	0.198	1.219	0.971519	1.52947	0.087	0	D01AC Imidazole and triazole derivatives	0.285
p1yr	G	D01AC	877	294	19534	5144	0.1162	1.1233	0.976484	1.29208	0.1	0	D01AC Imidazole and triazole derivatives	0.419
p1yr	H	D01AC	132	15	24055	623	1.0562	2.8755	1.63353	5.06159	0.00025	-1	D01AC Imidazole and triazole derivatives	0.00103
p1yr	H	D01AC	127	20	23314	1364	0.6357	1.8883	1.15439	3.08864	0.011	-1	D01AC Imidazole and triazole derivatives	0.0426
p1yr	H	D01AC	121	26	22167	2511	0.2587	1.2953	0.831643	2.01743	0.25	0	D01AC Imidazole and triazole derivatives	0.481
p1yr	H	D01AC	108	39	19534	5144	-0.0402	0.9606	0.656027	1.4067	0.84	0	D01AC Imidazole and triazole derivatives	0.935
p1yr	A	D01AE	1149	22	2254	53	-0.5264	0.5907	0.342766	1.01797	0.058	0	D01AE Other antifungals for topical use	0.245
p1yr	A	D01AE	1099	72	2196	111	0.1175	1.1247	0.810027	1.56169	0.48	0	D01AE Other antifungals for topical use	0.681
p1yr	A	D01AE	1154	17	2286	21	-0.0052	0.9948	0.493286	2.00613	0.99	0	D01AE Other antifungals for topical use	0.99
p1yr	A	D01AE	1165	6	2301	6	0.0197	1.0199	0.286521	3.63028	0.98	0	D01AE Other antifungals for topical use	0.994
p1yr	B	D01AE	134	13	3161	170	0.4128	1.5111	0.784077	2.91222	0.22	0	D01AE Other antifungals for topical use	0.593
p1yr	B	D01AE	142	5	3261	70	0.1861	1.2046	0.444654	3.26309	0.71	0	D01AE Other antifungals for topical use	0.837
p1yr	C	D01AE	1154	17	360432	2104	0.6342	1.8855	1.15926	3.06668	0.011	-1	D01AE Other antifungals for topical use	0.0268
p1yr	C	D01AE	1165	6	361912	624	0.6803	1.9746	0.8667	4.49853	0.1	0	D01AE Other antifungals for topical use	0.151
p1yr	C	D01AE	1099	72	346660	15876	0.1149	1.1217	0.880942	1.4283	0.35	0	D01AE Other antifungals for topical use	0.481
p1yr	C	D01AE	1149	22	357183	5353	-0.0276	0.9728	0.6356	1.48894	0.9	0	D01AE Other antifungals for topical use	0.932
p1yr	D	D01AE	134	13	346660	15876	0.4436	1.5583	0.876094	2.77175	0.13	0	D01AE Other antifungals for topical use	0.299
p1yr	D	D01AE	142	5	357183	5353	0.4989	1.6469	0.666582	4.0687	0.28	0	D01AE Other antifungals for topical use	0.406
p1yr	E	D01AE	3440	38	360432	2104	0.5678	1.7644	1.27477	2.4422	0.00062	-1	D01AE Other antifungals for topical use	0.00274
p1yr	E	D01AE	3403	75	357183	5353	0.3135	1.3682	1.08493	1.72549	0.0081	-1	D01AE Other antifungals for topical use	0.0306
p1yr	E	D01AE	3466	12	361912	624	0.5977	1.8179	1.02066	3.23786	0.042	-1	D01AE Other antifungals for topical use	0.0759
p1yr	E	D01AE	3295	183	346660	15876	0.1235	1.1315	0.972824	1.31602	0.11	0	D01AE Other antifungals for topical use	0.221
p1yr	F	D01AE	3440	38	24438	240	0.1686	1.1837	0.832585	1.68276	0.35	0	D01AE Other antifungals for topical use	0.601
p1yr	F	D01AE	3466	12	24570	108	-0.1745	0.8398	0.457652	1.54118	0.57	0	D01AE Other antifungals for topical use	0.83
p1yr	F	D01AE	3403	75	24159	519	0.0567	1.0583	0.824061	1.3592	0.66	0	D01AE Other antifungals for topical use	0.83
p1yr	F	D01AE	3295	183	23337	1341	-0.0072	0.9928	0.843974	1.16797	0.93	0	D01AE Other antifungals for topical use	0.971
p1yr	G	D01AE	1149	22	24159	519	-0.258	0.7726	0.499997	1.19378	0.24	0	D01AE Other antifungals for topical use	0.537
p1yr	G	D01AE	1154	17	24438	240	0.2771	1.3193	0.798609	2.17944	0.28	0	D01AE Other antifungals for topical use	0.561
p1yr	G	D01AE	1165	6	24570	108	0.0493	1.0505	0.457405	2.41272	0.91	0	D01AE Other antifungals for topical use	0.982
p1yr	G	D01AE	1099	72	23337	1341	0.0025	1.0025	0.782058	1.2852	0.98	0	D01AE Other antifungals for topical use	0.984
p1yr	H	D01AE	134	13	23337	1341	0.3247	1.3836	0.771444	2.4814	0.28	0	D01AE Other antifungals for topical use	0.631
p1yr	H	D01AE	142	5	24159	519	0.2897	1.3361	0.535006	3.33665	0.54	0	D01AE Other antifungals for topical use	0.73
p1yr	A	D01BA	1162	9	2293	14	0.4235	1.5273	0.626595	3.72251	0.35	0	D01BA Antifungals for systemic use	0.552
p1yr	A	D01BA	1154	17	2276	31	0.1968	1.2175	0.650291	2.27962	0.54	0	D01BA Antifungals for systemic use	0.706
p1yr	A	D01BA	1134	37	2238	69	0.0522	1.0536	0.685594	1.61919	0.81	0	D01BA Antifungals for systemic use	0.893
p1yr	C	D01BA	1165	6	362113	423	1.3609	3.8999	1.72477	8.81794	0.0011	-1	D01BA Antifungals for systemic use	0.0025
p1yr	C	D01BA	1162	9	361271	1265	0.7544	2.1263	1.09787	4.11793	0.025	-1	D01BA Antifungals for systemic use	0.0503
p1yr	C	D01BA	1154	17	359404	3132	0.4621	1.5873	0.978717	2.57443	0.061	0	D01BA Antifungals for systemic use	0.12
p1yr	C	D01BA	1134	37	353638	8898	0.1666	1.1813	0.84916	1.6434	0.32	0	D01BA Antifungals for systemic use	0.452
p1yr	E	D01BA	3430	48	359404	3132	0.4378	1.5493	1.16122	2.06714	0.0029	-1	D01BA Antifungals for systemic use	0.0127
p1yr	E	D01BA	3455	23	361271	1265	0.6063	1.8336	1.21067	2.77703	0.0042	-1	D01BA Antifungals for systemic use	0.0158
p1yr	E	D01BA	3469	9	362113	423	0.7132	2.0406	1.05064	3.96332	0.035	-1	D01BA Antifungals for systemic use	0.065
p1yr	E	D01BA	3372	106	353638	8898	0.1808	1.1982	0.985533	1.45681	0.07	0	D01BA Antifungals for systemic use	0.158
p1yr	F	D01BA	3430	48	24458	220	0.4195	1.5212	1.10375	2.09656	0.01	-1	D01BA Antifungals for systemic use	0.0803
p1yr	F	D01BA	3455	23	24577	101	0.4498	1.5679	0.98569	2.49413	0.058	0	D01BA Antifungals for systemic use	0.242
p1yr	F	D01BA	3372	106	24037	641	0.1742	1.1903	0.962093	1.47269	0.11	0	D01BA Antifungals for systemic use	0.294
[truncated: 3,450 more rows]
