# Supplementary material for: Exploring Drugs and Vaccines Associated with Altered Risks and Severity of COVID-19: A UK Biobank Cohort Study of All ATC Level-4 Drug Categories Reveals Repositioning Opportunities
Source: Pharmaceutics. 2021 Sep 18;13(9):1514. doi: 10.3390/pharmaceutics13091514 (PMC8471264; doi:10.3390/pharmaceutics13091514)
Supplement: Supplementary file 1 [file pharmaceutics-13-01514-s001.zip › TableS9-Multiple-imputation-on-covariates-GP-available-no-IPW-int-rm-vaccine-p6m-rm-epv.xlsx]

## Sheet: TableS13-Multiple-imputation-on
Windows	Model	drug	case_notx	case_tx	ctrl_notx	ctrl_tx	estimate	OR	conf.low	conf.high	p	sig	Full name	p.adj
p6m	A	A01AB	1286	32	2505	35	0.427695	1.53372	0.909683	2.58584	0.108	0	A01AB Antiinfectives and antiseptics for local oral treatment	0.258
p6m	A	A01AD	1306	12	2532	8	0.656866	1.92874	0.745432	4.99044	0.176	0	A01AD Other agents for local oral treatment	0.352
p6m	A	A02BA	1283	35	2524	16	1.09876	3.00046	1.58988	5.66252	0.000701	-1	A02BA H2-receptor antagonists [DG:DG01481]	0.0061
p6m	A	A02BC	925	393	1945	595	-0.144013	0.865876	0.730754	1.02598	0.0962	0	A02BC Proton pump inhibitors [DG:DG01646]	0.247
p6m	A	A02BX	1271	47	2484	56	0.059809	1.06163	0.692797	1.62683	0.783	0	A02BX Other drugs for peptic ulcer and gastro-oesophageal reflux disease (GORD)	0.878
p6m	A	A03AA	1305	13	2523	17	0.20053	1.22205	0.565188	2.64232	0.61	0	A03AA Synthetic anticholinergics, esters with tertiary amino group	0.774
p6m	A	A03AX	1313	5	2531	9	-0.307658	0.735167	0.223918	2.4137	0.612	0	A03AX Other drugs for functional gastrointestinal disorders	0.774
p6m	A	A03BB	1285	33	2520	20	0.883741	2.41994	1.33362	4.39111	0.00366	-1	A03BB Belladonna alkaloids, semisynthetic, quaternary ammonium compounds	0.0226
p6m	A	A03FA	1295	23	2535	5	1.78641	5.96799	2.19044	16.2602	0.000481	-1	A03FA Propulsives [DG:DG01763]	0.00445
p6m	A	A06AA	1251	67	2518	22	1.2336	3.43355	2.06595	5.70647	2e-06	-1	A06AA Softeners, emollients	3.39e-05
p6m	A	A06AB	1210	108	2501	39	1.13267	3.10395	2.0948	4.59925	1.75e-08	-1	A06AB Contact laxatives	4.32e-07
p6m	A	A06AC	1312	6	2535	5	0.676825	1.96762	0.58386	6.63092	0.275	0	A06AC Bulk-forming laxatives	0.473
p6m	A	A06AD	1165	153	2440	100	0.685895	1.98555	1.49777	2.63218	1.91e-06	-1	A06AD Osmotically acting laxatives	3.39e-05
p6m	A	A06AG	1312	6	2534	6	0.18507	1.2033	0.358405	4.03995	0.764	0	A06AG Enemas	0.87
p6m	A	A07AA	1297	21	2531	9	1.00574	2.73394	1.2023	6.21677	0.0164	-1	A07AA Antibiotics	0.0759
p6m	A	A07DA	1285	33	2520	20	0.706429	2.02674	1.11402	3.68726	0.0207	-1	A07DA Antipropulsives	0.0875
p6m	A	A07EC	1302	16	2524	16	0.352992	1.42332	0.677485	2.99023	0.351	0	A07EC Aminosalicylic acid and similar agents	0.565
p6m	A	A10AB	1238	80	2493	47	0.389747	1.47661	0.950583	2.29372	0.0828	0	A10AB Insulins and analogues for injection, fast-acting	0.219
p6m	A	A10AC	1305	13	2534	6	0.331569	1.39315	0.482578	4.02189	0.54	0	A10AC Insulins and analogues for injection, intermediate-acting	0.747
p6m	A	A10AD	1291	27	2530	10	0.517122	1.67719	0.760341	3.69963	0.2	0	A10AD Insulins and analogues for injection, intermediate- or long-acting combined with fast-acting	0.384
p6m	A	A10AE	1296	22	2531	9	0.532293	1.70283	0.734522	3.94765	0.215	0	A10AE Insulins and analogues for injection, long-acting	0.398
p6m	A	A10BA	1196	122	2391	149	-0.351012	0.703975	0.509166	0.97332	0.0337	1	A10BA Biguanides [DG:DG01684]	0.128
p6m	A	A10BB	1286	32	2488	52	-0.68606	0.503556	0.301749	0.84033	0.00866	1	A10BB Sulfonylureas	0.0458
p6m	A	A10BH	1283	35	2498	42	-0.486157	0.614985	0.367516	1.02909	0.0642	0	A10BH Dipeptidyl peptidase 4 (DPP-4) inhibitors [DG:DG01601]	0.196
p6m	A	A10BJ	1309	9	2523	17	-0.704977	0.49412	0.196297	1.2438	0.134	0	A10BJ Glucagon-like peptide-1 receptor (GLP-1) analogues	0.296
p6m	A	A10BK	1298	20	2507	33	-0.326488	0.721453	0.388116	1.34108	0.302	0	A10BK Sodium-glucose co-transporter 2 (SGLT2) inhibitors	0.508
p6m	A	A11CC	1272	46	2502	38	0.332496	1.39444	0.865676	2.24619	0.172	0	A11CC Vitamin D and analogues	0.349
p6m	A	A11DA	1289	29	2534	6	1.68722	5.40444	2.16401	13.4971	0.000305	-1	A11DA Vitamin B1, plain	0.00301
p6m	A	A12AX	1161	157	2404	136	0.400872	1.49313	1.14831	1.94148	0.00278	-1	A12AX Calcium, combinations with vitamin D and/or other drugs	0.0187
p6m	A	B01AA	1288	30	2512	28	0.187766	1.20655	0.693824	2.09818	0.506	0	B01AA Vitamin K antagonists	0.706
p6m	A	B01AC	1112	206	2309	231	-0.16865	0.844805	0.664585	1.0739	0.168	0	B01AC Platelet aggregation inhibitors excl. heparin	0.345
p6m	A	B01AF	1201	117	2446	94	0.402788	1.49599	1.10544	2.02452	0.00908	-1	B01AF Direct factor Xa inhibitors	0.0463
p6m	A	B03AA	1240	78	2507	33	0.95192	2.59068	1.6647	4.03173	2.5e-05	-1	B03AA Iron bivalent, oral preparations	0.000308
p6m	A	B03BA	1268	50	2499	41	0.440849	1.55403	0.98805	2.44421	0.0564	0	B03BA Vitamin B12 (cyanocobalamin and analogues)	0.194
p6m	A	B03BB	1245	73	2487	53	0.353099	1.42347	0.965099	2.09955	0.0749	0	B03BB Folic acid and derivatives	0.213
p6m	A	B05CB	1310	8	2534	6	0.315152	1.37047	0.463662	4.05075	0.569	0	B05CB Salt solutions	0.753
p6m	A	C01AA	1303	15	2521	19	-0.320031	0.726126	0.353312	1.49233	0.384	0	C01AA Digitalis glycosides [DG:DG01697]	0.586
p6m	A	C01DA	1250	68	2483	57	0.00549279	1.00551	0.663144	1.52462	0.979	0	C01DA Organic nitrates	0.992
p6m	A	C01EB	1309	9	2526	14	-0.72371	0.48495	0.194068	1.21183	0.121	0	C01EB Other cardiac preparations	0.276
p6m	A	C02CA	1283	35	2500	40	-0.213323	0.807895	0.491993	1.32663	0.399	0	C02CA Alpha-adrenoreceptor antagonists	0.596
p6m	A	C03AA	1274	44	2474	66	-0.271713	0.762073	0.499835	1.16189	0.207	0	C03AA Thiazides, plain [DG:DG01749]	0.393
p6m	A	C03BA	1282	36	2502	38	0.247739	1.28113	0.781567	2.09999	0.326	0	C03BA Sulfonamides, plain	0.536
p6m	A	C03CA	1200	118	2479	61	0.564025	1.75773	1.24341	2.48479	0.00141	-1	C03CA Sulfonamides, plain	0.0104
p6m	A	C03DA	1291	27	2519	21	0.253588	1.28864	0.691321	2.40206	0.425	0	C03DA Aldosterone antagonists	0.623
p6m	A	C05AX	1305	13	2524	16	-0.00375895	0.996248	0.442252	2.24422	0.993	0	C05AX Other agents for treatment of hemorrhoids and anal fissures for topical use	0.994
p6m	A	C07AA	1303	15	2523	17	0.639771	1.89605	0.890641	4.03641	0.097	0	C07AA Beta blocking agents, non-selective	0.247
p6m	A	C07AB	1132	186	2328	212	-0.0211096	0.979112	0.770273	1.24457	0.863	0	C07AB Beta blocking agents, selective	0.912
p6m	A	C07AG	1310	8	2535	5	0.545666	1.72576	0.514705	5.7863	0.377	0	C07AG Alpha and beta blocking agents	0.586
p6m	A	C08CA	1103	215	2217	323	-0.187974	0.828636	0.671061	1.02321	0.0807	0	C08CA Dihydropyridine derivatives [DG:DG01928]	0.219
p6m	A	C08DB	1307	11	2526	14	-0.23573	0.789994	0.344991	1.80901	0.577	0	C08DB Benzothiazepine derivatives	0.756
p6m	A	C09AA	1132	186	2223	317	-0.348631	0.705653	0.566062	0.879667	0.00194	1	C09AA ACE inhibitors, plain [DG:DG01501]	0.0137
p6m	A	C09CA	1208	110	2363	177	-0.32662	0.721357	0.547631	0.950195	0.0202	1	C09CA Angiotensin II receptor blockers, plain [DG:DG01495]	0.0875
p6m	A	C10AA	895	423	1856	684	-0.506654	0.602508	0.506037	0.71737	1.34e-08	1	C10AA HMG CoA reductase inhibitors [DG:DG01660]	3.97e-07
p6m	A	C10AB	1309	9	2535	5	0.351967	1.42186	0.446711	4.52573	0.551	0	C10AB Fibrates	0.753
p6m	A	C10AX	1300	18	2519	21	-0.0199414	0.980256	0.49871	1.92677	0.954	0	C10AX Other lipid modifying agents	0.98
p6m	A	D01AC	1259	59	2484	56	0.252563	1.28732	0.858238	1.93093	0.222	0	D01AC Imidazole and triazole derivatives	0.406
p6m	A	D01AE	1312	6	2534	6	0.00483135	1.00484	0.28436	3.55081	0.994	0	D01AE Other antifungals for topical use	0.994
p6m	A	D02AC	1298	20	2515	25	-0.113653	0.892568	0.473144	1.68379	0.726	0	D02AC Soft paraffin and fat products	0.844
p6m	A	D02AE	1308	10	2532	8	0.459528	1.58333	0.579536	4.32574	0.37	0	D02AE Carbamide products	0.583
p6m	A	D02AX	1197	121	2434	106	0.301377	1.35172	1.0089	1.81102	0.0435	-1	D02AX Other emollients and protectives	0.154
p6m	A	D05AX	1310	8	2526	14	-0.100702	0.904203	0.355785	2.29797	0.832	0	D05AX Other antipsoriatics for topical use	0.903
p6m	A	D06AX	1308	10	2528	12	0.163686	1.17784	0.474979	2.9208	0.724	0	D06AX Other antibiotics for topical use	0.844
p6m	A	D07AA	1303	15	2527	13	0.770245	2.1603	0.971262	4.80496	0.059	0	D07AA Corticosteroids, weak (group I)	0.194
p6m	A	D07AB	1300	18	2532	8	1.49373	4.45368	1.82373	10.8762	0.00105	-1	D07AB Corticosteroids, moderately potent (group II)	0.00818
p6m	A	D07AC	1279	39	2497	43	0.192608	1.21241	0.757653	1.94011	0.422	0	D07AC Corticosteroids, potent (group III)	0.623
p6m	A	D07AD	1305	13	2528	12	0.532556	1.70328	0.736503	3.93911	0.213	0	D07AD Corticosteroids, very potent (group IV)	0.398
p6m	A	D07CA	1309	9	2535	5	1.00061	2.71994	0.81996	9.02249	0.102	0	D07CA Corticosteroids, weak, combinations with antibiotics	0.247
p6m	A	D07CC	1303	15	2519	21	-0.212141	0.808851	0.389155	1.68118	0.57	0	D07CC Corticosteroids, potent, combinations with antibiotics	0.753
p6m	A	D09AA	1312	6	2533	7	-0.143346	0.866454	0.273526	2.74468	0.807	0	D09AA Medicated dressings with antiinfectives	0.885
p6m	A	D11AC	1312	6	2531	9	-0.517376	0.596083	0.192862	1.84233	0.369	0	D11AC Medicated shampoos	0.583
p6m	A	G01AF	1304	14	2532	8	1.12501	3.08025	1.19824	7.91823	0.0195	-1	G01AF Imidazole derivatives	0.0875
p6m	A	G03BA	1312	6	2529	11	-0.77353	0.461381	0.158014	1.34718	0.157	0	G03BA 3-oxoandrosten (4) derivatives	0.327
p6m	A	G03CA	1284	34	2463	77	0.20888	1.2323	0.794151	1.91218	0.351	0	G03CA Natural and semisynthetic estrogens, plain	0.565
p6m	A	G04BD	1280	38	2482	58	-0.227824	0.796265	0.508679	1.24644	0.319	0	G04BD Urinary antispasmodics	0.53
p6m	A	G04BE	1273	45	2475	65	-0.00842708	0.991608	0.653501	1.50464	0.968	0	G04BE Drugs used in erectile dysfunction	0.988
p6m	A	G04CA	1311	7	2533	7	0.171163	1.18668	0.392933	3.58387	0.761	0	G04CA Alpha-adrenoreceptor antagonists	0.87
p6m	A	G04CB	1286	32	2507	33	-0.234195	0.791208	0.468184	1.3371	0.382	0	G04CB Testosterone-5-alpha reductase inhibitors	0.586
p6m	A	H02AA	1312	6	2535	5	0.166745	1.18145	0.334753	4.16973	0.795	0	H02AA Mineralocorticoids	0.878
p6m	A	H02AB	1196	122	2474	66	1.06068	2.88833	2.06633	4.03732	5.89e-10	-1	H02AB Glucocorticoids	2.91e-08
p6m	A	H03AA	1237	81	2370	170	-0.282142	0.754167	0.559524	1.01652	0.064	0	H03AA Thyroid hormones	0.196
p6m	A	J01AA	1198	120	2475	65	1.12524	3.08096	2.20917	4.29679	3.76e-11	-1	J01AA Tetracyclines [DG:DG01197]	2.78e-09
p6m	A	J01CA	1161	157	2445	95	1.03872	2.82559	2.12792	3.75201	8.24e-13	-1	J01CA Penicillins with extended spectrum [DG:DG01780]	1.22e-10
p6m	A	J01CE	1310	8	2532	8	0.601231	1.82436	0.621818	5.35253	0.274	0	J01CE Beta-lactamase sensitive penicillins [DG:DG01778]	0.473
p6m	A	J01CF	1239	79	2489	51	0.790294	2.20404	1.49829	3.24224	6.07e-05	-1	J01CF Beta-lactamase resistant penicillins [DG:DG01779]	0.000642
p6m	A	J01CR	1273	45	2521	19	1.26715	3.55073	1.98898	6.33877	1.86e-05	-1	J01CR Combinations of penicillins, incl. beta-lactamase inhibitors	0.00025
p6m	A	J01DB	1303	15	2533	7	0.983434	2.67362	1.02836	6.95108	0.0437	-1	J01DB First-generation cephalosporins [DG:DG01774]	0.154
p6m	A	J01EA	1288	30	2522	18	0.815615	2.26057	1.20343	4.24633	0.0112	-1	J01EA Trimethoprim and derivatives [DG:DG01581]	0.0553
p6m	A	J01FA	1265	53	2510	30	1.08974	2.97351	1.82429	4.84668	1.26e-05	-1	J01FA Macrolides [DG:DG01551]	0.000186
p6m	A	J01MA	1304	14	2533	7	0.880884	2.41303	0.929397	6.26506	0.0703	0	J01MA Fluoroquinolones [DG:DG01549]	0.208
p6m	A	J01XE	1234	84	2465	75	0.504745	1.65656	1.16978	2.34592	0.00448	-1	J01XE Nitrofuran derivatives	0.0255
p6m	A	J02AC	1306	12	2529	11	0.652037	1.91945	0.783789	4.70059	0.154	0	J02AC Triazole derivatives	0.326
p6m	A	J05AB	1303	15	2522	18	0.581764	1.78919	0.864448	3.70318	0.117	0	J05AB Nucleosides and nucleotides excl. reverse transcriptase inhibitors [DG:DG02840]	0.273
p6m	A	L02BG	1309	9	2517	23	-0.245075	0.782645	0.343598	1.78271	0.559	0	L02BG Aromatase inhibitors [DG:DG01596]	0.753
p6m	A	L04AX	1305	13	2515	25	-0.256434	0.773806	0.37397	1.60114	0.489	0	L04AX Other immunosuppressants	0.703
p6m	A	M01AB	1311	7	2530	10	0.341235	1.40668	0.514709	3.84443	0.506	0	M01AB Acetic acid derivatives and related substances	0.706
p6m	A	M01AE	1271	47	2460	80	0.096417	1.10122	0.743822	1.63034	0.63	0	M01AE Propionic acid derivatives	0.784
p6m	A	M01AH	1312	6	2534	6	0.305976	1.35795	0.407751	4.52244	0.618	0	M01AH Coxibs	0.775
p6m	A	M02AA	1233	85	2450	90	0.0446316	1.04564	0.752192	1.45358	0.79	0	M02AA Antiinflammatory preparations, non-steroids for topical use	0.878
p6m	A	M04AA	1265	53	2471	69	-0.224767	0.798703	0.534179	1.19422	0.273	0	M04AA Preparations inhibiting uric acid production	0.473
p6m	A	M04AC	1307	11	2529	11	0.0941247	1.0987	0.428408	2.81772	0.845	0	M04AC Preparations with no effect on uric acid metabolism	0.906
p6m	A	M05BA	1262	56	2491	49	0.476171	1.6099	1.06448	2.43477	0.0241	-1	M05BA Bisphosphonates [DG:DG01600]	0.0991
p6m	A	N01BB	1304	14	2532	8	1.02005	2.77332	1.10822	6.94022	0.0293	-1	N01BB Amides	0.117
p6m	A	N02AA	1230	88	2513	27	1.4275	4.16827	2.64256	6.57485	9.04e-10	-1	N02AA Natural opium alkaloids	3.34e-08
p6m	A	N02AE	1294	24	2523	17	0.227009	1.25484	0.650046	2.42233	0.499	0	N02AE Oripavine derivatives	0.706
p6m	A	N02AJ	1217	101	2419	121	0.177117	1.19377	0.888198	1.60447	0.24	0	N02AJ Opioids in combination with non-opioid analgesics	0.433
p6m	A	N02AX	1282	36	2506	34	0.115565	1.12251	0.675526	1.86525	0.655	0	N02AX Other opioids	0.801
p6m	A	N02BE	1004	314	2246	294	0.294305	1.34219	1.10309	1.63312	0.00329	-1	N02BE Anilides	0.0212
p6m	A	N02CC	1311	7	2509	31	-0.460363	0.631055	0.269576	1.47724	0.289	0	N02CC Selective serotonin (5HT1) agonists [DG:DG01943]	0.492
p6m	A	N03AB	1313	5	2535	5	0.497074	1.6439	0.447981	6.03245	0.454	0	N03AB Hydantoin derivatives	0.659
p6m	A	N03AF	1307	11	2534	6	0.913358	2.49268	0.891722	6.96792	0.0816	0	N03AF Carboxamide derivatives	0.219
p6m	A	N03AG	1309	9	2528	12	-0.0862815	0.917336	0.348898	2.41189	0.861	0	N03AG Fatty acid derivatives	0.912
p6m	A	N03AX	1186	132	2457	83	0.744723	2.10586	1.54903	2.86285	2.06e-06	-1	N03AX Other antiepileptics	3.39e-05
p6m	A	N04BA	1294	24	2526	14	0.706692	2.02727	1.02099	4.02536	0.0435	-1	N04BA Dopa and dopa derivatives	0.154
p6m	A	N04BC	1303	15	2530	10	0.672753	1.95962	0.843843	4.55076	0.118	0	N04BC Dopamine agonists	0.273
p6m	A	N05AB	1295	23	2530	10	1.35243	3.8668	1.75261	8.53133	0.000814	-1	N05AB Phenothiazines with piperazine structure	0.00669
p6m	A	N05AH	1308	10	2523	17	-0.223496	0.799718	0.34407	1.85878	0.603	0	N05AH Diazepines, oxazepines and thiazepines	0.774
p6m	A	N05AX	1298	20	2528	12	0.725081	2.0649	0.967848	4.40545	0.0607	0	N05AX Other antipsychotics	0.195
p6m	A	N05BA	1272	46	2494	46	0.394638	1.48385	0.952801	2.31087	0.0808	0	N05BA Benzodiazepine derivatives [DG:DG01914]	0.219
p6m	A	N05CD	1285	33	2523	17	0.793016	2.21005	1.18733	4.11372	0.0124	-1	N05CD Benzodiazepine derivatives	0.0592
p6m	A	N05CF	1288	30	2502	38	0.134011	1.14341	0.684991	1.9086	0.608	0	N05CF Benzodiazepine related drugs	0.774
p6m	A	N06AA	1236	82	2437	103	0.0689874	1.07142	0.770312	1.49024	0.682	0	N06AA Non-selective monoamine reuptake inhibitors [DG:DG01730]	0.821
p6m	A	N06AB	1200	118	2339	201	-0.0499198	0.951306	0.724279	1.24949	0.72	0	N06AB Selective serotonin reuptake inhibitors	0.844
p6m	A	N06AX	1234	84	2454	86	0.325886	1.38526	0.987826	1.94259	0.0589	0	N06AX Other antidepressants	0.194
p6m	A	N06DA	1289	29	2506	34	-0.0741153	0.928565	0.543723	1.58579	0.786	0	N06DA Anticholinesterases	0.878
p6m	A	N06DX	1287	31	2507	33	-0.0325973	0.967928	0.561997	1.66706	0.906	0	N06DX Other anti-dementia drugs	0.944
p6m	A	N07CA	1301	17	2519	21	-0.0750153	0.927729	0.456783	1.88423	0.836	0	N07CA Antivertigo preparations	0.903
p6m	A	P01AB	1306	12	2530	10	0.745663	2.10784	0.867027	5.12439	0.0999	0	P01AB Nitroimidazole derivatives	0.247
p6m	A	P01BA	1308	10	2532	8	0.578523	1.7834	0.649849	4.89425	0.261	0	P01BA Aminoquinolines	0.465
p6m	A	P01BC	1292	26	2523	17	0.437161	1.5483	0.798062	3.00384	0.196	0	P01BC Methanolquinolines	0.382
p6m	A	R01AD	1260	58	2436	104	-0.269676	0.763627	0.532786	1.09448	0.142	0	R01AD Corticosteroids	0.309
p6m	A	R03AC	1163	155	2361	179	0.211632	1.23569	0.941675	1.62151	0.127	0	R03AC Selective beta-2-adrenoreceptor agonists	0.285
p6m	A	R03AK	1229	89	2420	120	0.0977106	1.10264	0.787522	1.54386	0.569	0	R03AK Adrenergics in combination with corticosteroids or other drugs, excl. anticholinergics	0.753
p6m	A	R03AL	1293	25	2529	11	0.83433	2.30327	1.07906	4.91639	0.031	-1	R03AL Adrenergics in combination with anticholinergics incl. triple combinations with corticosteroids	0.121
p6m	A	R03BA	1287	31	2458	82	-0.681696	0.505758	0.316982	0.80696	0.00425	1	R03BA Glucocorticoids	0.0252
p6m	A	R03BB	1285	33	2509	31	0.0989832	1.10405	0.628815	1.93844	0.73	0	R03BB Anticholinergics	0.844
p6m	A	R03DA	1313	5	2535	5	-0.246859	0.781251	0.205813	2.96557	0.717	0	R03DA Xanthines	0.844
p6m	A	R03DC	1307	11	2520	20	-0.347233	0.706641	0.318221	1.56917	0.394	0	R03DC Leukotriene receptor antagonists	0.595
p6m	A	R05CB	1286	32	2522	18	0.573937	1.77524	0.946755	3.32873	0.0735	0	R05CB Mucolytics	0.213
p6m	A	R05DA	1265	53	2491	49	0.578239	1.7829	1.16415	2.73051	0.00785	-1	R05DA Opium alkaloids and derivatives	0.043
p6m	A	R06AE	1236	82	2487	53	0.791104	2.20583	1.5057	3.23151	4.96e-05	-1	R06AE Piperazine derivatives	0.000565
p6m	A	R06AX	1280	38	2482	58	-0.0368531	0.963818	0.61391	1.51316	0.873	0	R06AX Other antihistamines for systemic use	0.916
p6m	A	S01AA	1295	23	2523	17	0.505873	1.65843	0.84119	3.26965	0.144	0	S01AA Antibiotics	0.309
p6m	A	S01EC	1308	10	2530	10	-0.035417	0.965203	0.371721	2.50622	0.942	0	S01EC Carbonic anhydrase inhibitors	0.975
p6m	A	S01ED	1309	9	2521	19	-0.709582	0.49185	0.211075	1.14612	0.1	0	S01ED Beta blocking agents	0.247
p6m	A	S01EE	1298	20	2505	35	-0.407965	0.665002	0.365249	1.21076	0.182	0	S01EE Prostaglandin analogues	0.359
p6m	A	S01GX	1308	10	2529	11	0.204495	1.22691	0.4849	3.10435	0.666	0	S01GX Other antiallergics	0.808
p6m	A	S01XA	1248	70	2464	76	0.0879239	1.09191	0.757263	1.57443	0.638	0	S01XA Other ophthalmologicals	0.787
p6m	A	V07AY	1256	62	2498	42	0.420408	1.52258	0.974532	2.37884	0.0648	0	V07AY Other non-therapeutic auxiliary products	0.196
p6m	B	A02BA	162	8	3645	43	0.963323	2.62039	1.1402	6.02212	0.0233	-1	A02BA H2-receptor antagonists [DG:DG01481]	0.056
p6m	B	A02BC	107	63	2763	925	0.12472	1.13283	0.798225	1.6077	0.485	0	A02BC Proton pump inhibitors [DG:DG01646]	0.641
p6m	B	A02BX	161	9	3594	94	0.39893	1.49023	0.707825	3.13747	0.293	0	A02BX Other drugs for peptic ulcer and gastro-oesophageal reflux disease (GORD)	0.462
p6m	B	A03BB	152	18	3653	35	2.08817	8.07013	4.08677	15.9361	1.94e-09	-1	A03BB Belladonna alkaloids, semisynthetic, quaternary ammonium compounds	5.3e-08
p6m	B	A03FA	162	8	3668	20	1.86787	6.47451	2.49537	16.7988	0.000124	-1	A03FA Propulsives [DG:DG01763]	0.00113
p6m	B	A06AA	158	12	3611	77	0.441318	1.55476	0.799566	3.02322	0.193	0	A06AA Softeners, emollients	0.344
p6m	B	A06AB	136	34	3575	113	1.24848	3.48505	2.20299	5.51322	1e-07	-1	A06AB Contact laxatives	2.05e-06
p6m	B	A06AD	131	39	3474	214	0.794147	2.21255	1.45921	3.35483	0.000186	-1	A06AD Osmotically acting laxatives	0.00127
p6m	B	A07AA	165	5	3663	25	0.752873	2.12309	0.728214	6.18983	0.168	0	A07AA Antibiotics	0.306
p6m	B	A07DA	164	6	3641	47	0.606702	1.83437	0.704843	4.774	0.214	0	A07DA Antipropulsives	0.373
p6m	B	A10AB	153	17	3578	110	0.885495	2.42419	1.19699	4.90954	0.0139	-1	A10AB Insulins and analogues for injection, fast-acting	0.041
p6m	B	A10AD	165	5	3656	32	0.332874	1.39497	0.465083	4.18408	0.552	0	A10AD Insulins and analogues for injection, intermediate- or long-acting combined with fast-acting	0.686
p6m	B	A10AE	163	7	3664	24	1.20153	3.32519	1.17273	9.42827	0.0239	-1	A10AE Insulins and analogues for injection, long-acting	0.056
p6m	B	A10BA	154	16	3433	255	-0.213381	0.807848	0.42211	1.54609	0.519	0	A10BA Biguanides [DG:DG01684]	0.665
p6m	B	A10BB	164	6	3610	78	0.142174	1.15278	0.442288	3.00459	0.771	0	A10BB Sulfonylureas	0.866
p6m	B	A10BH	163	7	3618	70	0.16373	1.1779	0.484703	2.86245	0.718	0	A10BH Dipeptidyl peptidase 4 (DPP-4) inhibitors [DG:DG01601]	0.829
p6m	B	A11CC	161	9	3613	75	0.357546	1.42982	0.657023	3.11157	0.367	0	A11CC Vitamin D and analogues	0.528
p6m	B	A11DA	161	9	3662	26	1.17485	3.23765	1.37905	7.60118	0.00699	-1	A11DA Vitamin B1, plain	0.0272
p6m	B	A12AX	144	26	3421	267	0.265807	1.30448	0.811382	2.09726	0.273	0	A12AX Calcium, combinations with vitamin D and/or other drugs	0.448
p6m	B	B01AC	131	39	3290	398	0.0507794	1.05209	0.686764	1.61175	0.816	0	B01AC Platelet aggregation inhibitors excl. heparin	0.892
p6m	B	B01AF	145	25	3502	186	0.353333	1.4238	0.878767	2.30689	0.151	0	B01AF Direct factor Xa inhibitors	0.288
p6m	B	B03AA	152	18	3595	93	0.965051	2.62492	1.45972	4.72022	0.00127	-1	B03AA Iron bivalent, oral preparations	0.00694
p6m	B	B03BA	162	8	3605	83	0.221808	1.24833	0.567451	2.7462	0.581	0	B03BA Vitamin B12 (cyanocobalamin and analogues)	0.711
p6m	B	B03BB	151	19	3581	107	0.671079	1.95635	1.11678	3.42708	0.019	-1	B03BB Folic acid and derivatives	0.0487
p6m	B	C01AA	164	6	3660	28	0.499813	1.64841	0.641163	4.23802	0.299	0	C01AA Digitalis glycosides [DG:DG01697]	0.462
p6m	B	C01DA	161	9	3572	116	-0.311955	0.732014	0.33965	1.57764	0.426	0	C01DA Organic nitrates	0.602
p6m	B	C02CA	164	6	3619	69	0.027	1.02737	0.416996	2.53116	0.953	0	C02CA Alpha-adrenoreceptor antagonists	0.991
p6m	B	C03AA	162	8	3586	102	-0.0360332	0.964608	0.441213	2.10889	0.928	0	C03AA Thiazides, plain [DG:DG01749]	0.988
p6m	B	C03BA	159	11	3625	63	0.893099	2.44269	1.18597	5.0311	0.0154	-1	C03BA Sulfonamides, plain	0.0421
p6m	B	C03CA	145	25	3534	154	0.361773	1.43587	0.861356	2.39359	0.165	0	C03CA Sulfonamides, plain	0.306
p6m	B	C07AB	130	40	3330	358	0.368484	1.44554	0.949995	2.19958	0.0853	0	C07AB Beta blocking agents, selective	0.189
p6m	B	C08CA	135	35	3185	503	-0.00476469	0.995247	0.654328	1.51379	0.982	0	C08CA Dihydropyridine derivatives [DG:DG01928]	0.991
p6m	B	C09AA	139	31	3216	472	0.00739766	1.00743	0.650566	1.56003	0.974	0	C09AA ACE inhibitors, plain [DG:DG01501]	0.991
p6m	B	C09CA	150	20	3421	267	0.00302648	1.00303	0.595335	1.68993	0.991	0	C09CA Angiotensin II receptor blockers, plain [DG:DG01495]	0.991
p6m	B	C10AA	95	75	2656	1032	0.00665453	1.00668	0.713926	1.41947	0.97	0	C10AA HMG CoA reductase inhibitors [DG:DG01660]	0.991
p6m	B	D01AC	153	17	3590	98	0.743737	2.10378	1.15873	3.81962	0.0145	-1	D01AC Imidazole and triazole derivatives	0.041
p6m	B	D02AE	165	5	3675	13	1.87644	6.5302	1.92992	22.096	0.00256	-1	D02AE Carbamide products	0.0117
p6m	B	D02AX	138	32	3493	195	0.755959	2.12965	1.3584	3.3388	0.000989	-1	D02AX Other emollients and protectives	0.00579
p6m	B	D07AC	161	9	3615	73	0.570443	1.76905	0.829944	3.77078	0.14	0	D07AC Corticosteroids, potent (group III)	0.273
p6m	B	G04BD	161	9	3601	87	0.256755	1.29273	0.614068	2.72144	0.499	0	G04BD Urinary antispasmodics	0.649
p6m	B	G04BE	162	8	3586	102	0.45856	1.58179	0.712146	3.51343	0.26	0	G04BE Drugs used in erectile dysfunction	0.435
p6m	B	G04CA	165	5	3679	9	1.86033	6.42587	1.84609	22.3672	0.00347	-1	G04CA Alpha-adrenoreceptor antagonists	0.015
p6m	B	G04CB	164	6	3629	59	-0.470963	0.6244	0.254412	1.53246	0.304	0	G04CB Testosterone-5-alpha reductase inhibitors	0.462
p6m	B	H02AB	144	26	3526	162	1.15278	3.16699	1.91131	5.24762	7.84e-06	-1	H02AB Glucocorticoids	0.000129
p6m	B	H03AA	151	19	3456	232	0.653245	1.92177	1.11038	3.32605	0.0196	-1	H03AA Thyroid hormones	0.0487
p6m	B	J01AA	148	22	3525	163	0.872938	2.39393	1.42676	4.01674	0.000952	-1	J01AA Tetracyclines [DG:DG01197]	0.00579
p6m	B	J01CA	136	34	3470	218	0.975783	2.65324	1.70835	4.12076	1.43e-05	-1	J01CA Penicillins with extended spectrum [DG:DG01780]	0.000168
p6m	B	J01CF	149	21	3579	109	0.894856	2.44698	1.41152	4.24205	0.00144	-1	J01CF Beta-lactamase resistant penicillins [DG:DG01779]	0.00738
p6m	B	J01CR	160	10	3634	54	1.01954	2.77192	1.29002	5.95613	0.009	-1	J01CR Combinations of penicillins, incl. beta-lactamase inhibitors	0.0307
p6m	B	J01EA	163	7	3647	41	0.752458	2.12221	0.881697	5.10807	0.0931	0	J01EA Trimethoprim and derivatives [DG:DG01581]	0.191
p6m	B	J01FA	159	11	3616	72	0.977071	2.65666	1.29599	5.4459	0.00764	-1	J01FA Macrolides [DG:DG01551]	0.0272
p6m	B	J01XE	150	20	3549	139	0.694991	2.00369	1.16581	3.44377	0.0119	-1	J01XE Nitrofuran derivatives	0.0375
p6m	B	M01AE	163	7	3568	120	0.331148	1.39257	0.602576	3.21825	0.438	0	M01AE Propionic acid derivatives	0.609
p6m	B	M02AA	153	17	3530	158	0.210353	1.23411	0.70445	2.16202	0.462	0	M02AA Antiinflammatory preparations, non-steroids for topical use	0.621
p6m	B	M04AA	161	9	3575	113	-0.0360864	0.964557	0.452254	2.05718	0.926	0	M04AA Preparations inhibiting uric acid production	0.988
p6m	B	M05BA	153	17	3600	88	1.16212	3.19672	1.7572	5.81552	0.000143	-1	M05BA Bisphosphonates [DG:DG01600]	0.00117
p6m	B	N02AA	136	34	3607	81	1.86864	6.47946	4.00283	10.4884	3.52e-14	-1	N02AA Natural opium alkaloids	1.74e-12
p6m	B	N02AE	159	11	3658	30	1.23412	3.43536	1.59461	7.40102	0.00163	-1	N02AE Oripavine derivatives	0.00786
p6m	B	N02AJ	151	19	3485	203	0.45827	1.58134	0.921286	2.71427	0.0964	0	N02AJ Opioids in combination with non-opioid analgesics	0.193
p6m	B	N02AX	165	5	3623	65	0.209608	1.23319	0.455069	3.34184	0.68	0	N02AX Other opioids	0.797
p6m	B	N02BE	96	74	3154	534	0.757633	2.13322	1.50802	3.01761	1.89e-05	-1	N02BE Anilides	0.000194
p6m	B	N03AX	139	31	3504	184	1.02709	2.79293	1.75859	4.43565	1.38e-05	-1	N03AX Other antiepileptics	0.000168
p6m	B	N04BA	163	7	3657	31	0.889745	2.43451	1.01246	5.85389	0.0469	-1	N04BA Dopa and dopa derivatives	0.107
p6m	B	N05AX	162	8	3664	24	1.2578	3.51766	1.39682	8.85865	0.00762	-1	N05AX Other antipsychotics	0.0272
p6m	B	N05BA	155	15	3611	77	0.938384	2.55585	1.34773	4.84695	0.00407	-1	N05BA Benzodiazepine derivatives [DG:DG01914]	0.0167
p6m	B	N05CD	145	25	3663	25	2.48002	11.9415	6.28841	22.6764	4.25e-14	-1	N05CD Benzodiazepine derivatives	1.74e-12
p6m	B	N06AA	159	11	3514	174	0.209451	1.233	0.626489	2.42669	0.544	0	N06AA Non-selective monoamine reuptake inhibitors [DG:DG01730]	0.686
p6m	B	N06AB	150	20	3389	299	0.330721	1.39197	0.807622	2.39912	0.234	0	N06AB Selective serotonin reuptake inhibitors	0.4
p6m	B	N06AX	155	15	3533	155	0.320659	1.37804	0.753286	2.52093	0.298	0	N06AX Other antidepressants	0.462
p6m	B	N06DA	160	10	3635	53	0.386789	1.47225	0.696772	3.11078	0.311	0	N06DA Anticholinesterases	0.464
p6m	B	N06DX	157	13	3637	51	0.606123	1.83331	0.902962	3.72222	0.0934	0	N06DX Other anti-dementia drugs	0.191
p6m	B	R01AD	164	6	3532	156	-0.334712	0.715544	0.298853	1.71323	0.452	0	R01AD Corticosteroids	0.618
p6m	B	R03AC	149	21	3375	313	0.278141	1.32067	0.750271	2.32472	0.335	0	R03AC Selective beta-2-adrenoreceptor agonists	0.491
p6m	B	R03AK	160	10	3489	199	0.0919691	1.09633	0.51353	2.34055	0.812	0	R03AK Adrenergics in combination with corticosteroids or other drugs, excl. anticholinergics	0.892
p6m	B	R03AL	164	6	3658	30	0.858222	2.35896	0.867896	6.41172	0.0925	0	R03AL Adrenergics in combination with anticholinergics incl. triple combinations with corticosteroids	0.191
p6m	B	R05CB	162	8	3646	42	1.06134	2.89025	1.20874	6.91095	0.017	-1	R05CB Mucolytics	0.045
p6m	B	R05DA	162	8	3594	94	0.190745	1.21015	0.541949	2.70222	0.642	0	R05DA Opium alkaloids and derivatives	0.763
p6m	B	R06AE	154	16	3569	119	0.752174	2.12161	1.16465	3.86487	0.014	-1	R06AE Piperazine derivatives	0.041
p6m	B	R06AX	165	5	3597	91	0.26839	1.30786	0.489736	3.49268	0.592	0	R06AX Other antihistamines for systemic use	0.714
p6m	B	S01AA	160	10	3658	30	1.55978	4.7578	2.11522	10.7018	0.000164	-1	S01AA Antibiotics	0.00122
p6m	B	S01XA	159	11	3553	135	0.106378	1.11224	0.555814	2.22572	0.764	0	S01XA Other ophthalmologicals	0.866
p6m	B	V07AY	156	14	3598	90	0.896265	2.45043	1.22091	4.91818	0.0117	-1	V07AY Other non-therapeutic auxiliary products	0.0375
p6m	C	A01AB	1286	32	390749	2393	1.01414	2.757	1.924	3.95065	3.29e-08	-1	A01AB Antiinfectives and antiseptics for local oral treatment	1.52e-07
p6m	C	A01AD	1306	12	392584	558	1.38326	3.98789	2.21184	7.19006	4.24e-06	-1	A01AD Other agents for local oral treatment	1.44e-05
p6m	C	A02BA	1283	35	390176	2966	0.743567	2.10342	1.48869	2.97201	2.49e-05	-1	A02BA H2-receptor antagonists [DG:DG01481]	7.07e-05
p6m	C	A02BC	925	393	321442	71700	0.211048	1.23497	1.08608	1.40427	0.00128	-1	A02BC Proton pump inhibitors [DG:DG01646]	0.00265
p6m	C	A02BX	1271	47	388391	4751	0.639638	1.89579	1.40408	2.55971	2.98e-05	-1	A02BX Other drugs for peptic ulcer and gastro-oesophageal reflux disease (GORD)	8.33e-05
p6m	C	A03AA	1305	13	390973	2169	0.198206	1.21921	0.699575	2.12483	0.484	0	A03AA Synthetic anticholinergics, esters with tertiary amino group	0.55
p6m	C	A03AX	1313	5	392272	870	0.053777	1.05525	0.432181	2.57659	0.906	0	A03AX Other drugs for functional gastrointestinal disorders	0.932
p6m	C	A03BB	1285	33	391773	1369	1.47586	4.37478	3.04457	6.28618	1.47e-15	-1	A03BB Belladonna alkaloids, semisynthetic, quaternary ammonium compounds	1.36e-14
p6m	C	A03FA	1295	23	392314	828	1.55619	4.74074	3.07915	7.29895	1.58e-12	-1	A03FA Propulsives [DG:DG01763]	1.11e-11
p6m	C	A04AA	1313	5	392969	173	1.69582	5.45113	2.19797	13.5193	0.000253	-1	A04AA Serotonin (5HT3) antagonists	0.000578
p6m	C	A06AA	1251	67	390791	2351	1.52189	4.58086	3.52302	5.95632	6.66e-30	-1	A06AA Softeners, emollients	1.07e-28
p6m	C	A06AB	1210	108	390079	3063	1.65169	5.21581	4.19877	6.47921	2.34e-50	-1	A06AB Contact laxatives	1.37e-48
p6m	C	A06AC	1312	6	391717	1425	0.0252781	1.0256	0.457408	2.2996	0.951	0	A06AC Bulk-forming laxatives	0.962
p6m	C	A06AD	1165	153	383979	9163	1.28569	3.61717	3.0263	4.32339	2.58e-45	-1	A06AD Osmotically acting laxatives	1.14e-43
p6m	C	A06AG	1312	6	393008	134	2.06298	7.86937	3.39289	18.252	1.54e-06	-1	A06AG Enemas	5.42e-06
p6m	C	A06AX	1309	9	392673	469	1.31197	3.71347	1.88525	7.3146	0.000149	-1	A06AX Other drugs for constipation	0.000364
p6m	C	A07AA	1297	21	392442	700	1.77785	5.91712	3.76943	9.28849	1.1e-14	-1	A07AA Antibiotics	9.22e-14
p6m	C	A07DA	1285	33	391115	2027	1.0761	2.93323	2.04677	4.20361	4.6e-09	-1	A07DA Antipropulsives	2.45e-08
p6m	C	A07EC	1302	16	390543	2599	0.288423	1.33432	0.810803	2.19587	0.257	0	A07EC Aminosalicylic acid and similar agents	0.328
p6m	C	A10AB	1238	80	387223	5919	0.555557	1.74291	1.33296	2.27895	4.9e-05	-1	A10AB Insulins and analogues for injection, fast-acting	0.000135
p6m	C	A10AC	1305	13	392389	753	0.519952	1.68195	0.946857	2.98772	0.0761	0	A10AC Insulins and analogues for injection, intermediate-acting	0.114
p6m	C	A10AD	1291	27	391869	1273	0.719012	2.05241	1.36202	3.09274	0.000589	-1	A10AD Insulins and analogues for injection, intermediate- or long-acting combined with fast-acting	0.0013
p6m	C	A10AE	1296	22	391195	1947	0.216434	1.24164	0.793978	1.94171	0.343	0	A10AE Insulins and analogues for injection, long-acting	0.419
p6m	C	A10BA	1196	122	375684	17458	-0.120405	0.886562	0.709135	1.10838	0.291	0	A10BA Biguanides [DG:DG01684]	0.366
p6m	C	A10BB	1286	32	388238	4904	-0.322679	0.724206	0.498459	1.05219	0.0905	0	A10BB Sulfonylureas	0.133
p6m	C	A10BH	1283	35	388544	4598	-0.150107	0.860616	0.601436	1.23149	0.412	0	A10BH Dipeptidyl peptidase 4 (DPP-4) inhibitors [DG:DG01601]	0.486
p6m	C	A10BJ	1309	9	391729	1413	-0.514539	0.597776	0.305042	1.17143	0.134	0	A10BJ Glucagon-like peptide-1 receptor (GLP-1) analogues	0.19
p6m	C	A10BK	1298	20	390308	2834	-0.162399	0.850102	0.535713	1.34899	0.491	0	A10BK Sodium-glucose co-transporter 2 (SGLT2) inhibitors	0.554
p6m	C	A11CC	1272	46	389402	3740	0.715081	2.04435	1.50218	2.78221	5.42e-06	-1	A11CC Vitamin D and analogues	1.77e-05
p6m	C	A11DA	1289	29	391982	1160	1.25829	3.5194	2.37925	5.20593	2.99e-10	-1	A11DA Vitamin B1, plain	1.7e-09
p6m	C	A11EX	1313	5	392543	599	-0.0609033	0.940914	0.382713	2.31327	0.894	0	A11EX Vitamin B-complex, other combinations	0.926
p6m	C	A12AX	1161	157	368867	24275	0.511956	1.66855	1.39959	1.98921	1.14e-08	-1	A12AX Calcium, combinations with vitamin D and/or other drugs	5.73e-08
p6m	C	B01AA	1288	30	388932	4210	0.19329	1.21324	0.837167	1.75824	0.307	0	B01AA Vitamin K antagonists	0.383
p6m	C	B01AB	1310	8	392922	220	1.98441	7.27473	3.52648	15.0069	7.82e-08	-1	B01AB Heparin group	3.44e-07
p6m	C	B01AC	1112	206	360572	32570	0.0402047	1.04102	0.878265	1.23394	0.643	0	B01AC Platelet aggregation inhibitors excl. heparin	0.694
p6m	C	B01AF	1201	117	379720	13422	0.618722	1.85655	1.52232	2.26417	9.99e-10	-1	B01AF Direct factor Xa inhibitors	5.49e-09
p6m	C	B03AA	1240	78	388952	4190	1.00212	2.72404	2.1309	3.48228	1.27e-15	-1	B03AA Iron bivalent, oral preparations	1.24e-14
p6m	C	B03BA	1268	50	389070	4072	0.831791	2.29743	1.71706	3.07397	2.16e-08	-1	B03BA Vitamin B12 (cyanocobalamin and analogues)	1.03e-07
p6m	C	B03BB	1245	73	387909	5233	0.935077	2.54741	1.99087	3.25953	1.05e-13	-1	B03BB Folic acid and derivatives	8.03e-13
p6m	C	B05CB	1310	8	392957	185	1.90481	6.71813	3.24265	13.9186	2.97e-07	-1	B05CB Salt solutions	1.16e-06
p6m	C	B05XA	1313	5	392788	354	0.273024	1.31393	0.525487	3.28536	0.559	0	B05XA Electrolyte solutions	0.619
p6m	C	C01AA	1303	15	391313	1829	0.211271	1.23525	0.734671	2.0769	0.425	0	C01AA Digitalis glycosides [DG:DG01697]	0.492
p6m	C	C01CA	1312	6	392730	412	1.40154	4.06146	1.8008	9.16006	0.000732	-1	C01CA Adrenergic and dopaminergic agents	0.00157
p6m	C	C01DA	1250	68	387790	5352	0.414927	1.51426	1.15037	1.99325	0.00309	-1	C01DA Organic nitrates	0.00591
p6m	C	C01DX	1305	13	391954	1188	-0.0495664	0.951642	0.53858	1.6815	0.865	0	C01DX Other vasodilators used in cardiac diseases	0.906
p6m	C	C01EB	1309	9	392236	906	-0.00710962	0.992916	0.505394	1.95072	0.984	0	C01EB Other cardiac preparations	0.99
p6m	C	C02CA	1283	35	386564	6578	-0.249486	0.779201	0.551783	1.10035	0.157	0	C02CA Alpha-adrenoreceptor antagonists	0.218
p6m	C	C03AA	1274	44	381539	11603	-0.213552	0.80771	0.59363	1.09899	0.174	0	C03AA Thiazides, plain [DG:DG01749]	0.236
p6m	C	C03BA	1282	36	387003	6139	0.183187	1.20104	0.857392	1.68242	0.287	0	C03BA Sulfonamides, plain	0.363
p6m	C	C03CA	1200	118	385186	7956	0.738533	2.09286	1.69565	2.58312	6.1e-12	-1	C03CA Sulfonamides, plain	4.13e-11
p6m	C	C03DA	1291	27	390343	2799	0.251927	1.2865	0.865996	1.9112	0.212	0	C03DA Aldosterone antagonists	0.276
p6m	C	C05AX	1305	13	391856	1286	0.722755	2.0601	1.18146	3.59216	0.0108	-1	C05AX Other agents for treatment of hemorrhoids and anal fissures for topical use	0.0194
p6m	C	C07AA	1303	15	390241	2901	0.300826	1.35097	0.808992	2.25606	0.25	0	C07AA Beta blocking agents, non-selective	0.321
p6m	C	C07AB	1132	186	360608	32534	-0.00988034	0.990168	0.83275	1.17734	0.911	0	C07AB Beta blocking agents, selective	0.932
p6m	C	C07AG	1310	8	392698	444	0.910775	2.48625	1.21833	5.07371	0.0123	-1	C07AG Alpha and beta blocking agents	0.0216
p6m	C	C08CA	1103	215	344730	48412	-0.0646125	0.937431	0.802779	1.09467	0.414	0	C08CA Dihydropyridine derivatives [DG:DG01928]	0.486
p6m	C	C08DB	1307	11	390349	2793	-0.563148	0.569414	0.311955	1.03936	0.0666	0	C08DB Benzothiazepine derivatives	0.101
p6m	C	C09AA	1132	186	347068	46074	-0.287143	0.750405	0.636635	0.884505	0.000619	1	C09AA ACE inhibitors, plain [DG:DG01501]	0.00134
p6m	C	C09CA	1208	110	367332	25810	-0.222085	0.800847	0.65359	0.981282	0.0322	1	C09CA Angiotensin II receptor blockers, plain [DG:DG01495]	0.0525
p6m	C	C10AA	895	423	291331	101811	-0.247034	0.781114	0.687503	0.887472	0.000149	1	C10AA HMG CoA reductase inhibitors [DG:DG01660]	0.000364
p6m	C	C10AB	1309	9	391858	1284	0.0268073	1.02717	0.527162	2.00143	0.937	0	C10AB Fibrates	0.953
p6m	C	C10AX	1300	18	389960	3182	-0.0938672	0.910404	0.566602	1.46282	0.698	0	C10AX Other lipid modifying agents	0.745
p6m	C	D01AC	1259	59	389431	3711	1.07422	2.92771	2.2311	3.84181	9.32e-15	-1	D01AC Imidazole and triazole derivatives	8.2e-14
p6m	C	D01AE	1312	6	392435	707	0.524271	1.68923	0.745673	3.82672	0.209	0	D01AE Other antifungals for topical use	0.276
p6m	C	D01BA	1312	6	392691	451	1.20895	3.34998	1.47308	7.61829	0.00393	-1	D01BA Antifungals for systemic use	0.00744
p6m	C	D02AC	1298	20	389978	3164	0.21734	1.24277	0.79115	1.95218	0.346	0	D02AC Soft paraffin and fat products	0.42
p6m	C	D02AE	1308	10	392351	791	0.833703	2.30183	1.22267	4.33348	0.0098	-1	D02AE Carbamide products	0.0178
p6m	C	D02AX	1197	121	383910	9232	0.931876	2.53927	2.0855	3.09176	1.74e-20	-1	D02AX Other emollients and protectives	2.04e-19
p6m	C	D05AX	1310	8	391904	1238	0.290352	1.3369	0.661115	2.70346	0.419	0	D05AX Other antipsoriatics for topical use	0.488
p6m	C	D06AX	1308	10	392320	822	0.763625	2.14604	1.11071	4.14643	0.0231	-1	D06AX Other antibiotics for topical use	0.0384
p6m	C	D07AA	1303	15	391847	1295	0.990521	2.69264	1.59954	4.53274	0.000193	-1	D07AA Corticosteroids, weak (group I)	0.000459
p6m	C	D07AB	1300	18	391878	1264	1.19866	3.31568	2.06348	5.32778	7.29e-07	-1	D07AB Corticosteroids, moderately potent (group II)	2.73e-06
p6m	C	D07AC	1279	39	389167	3975	0.805194	2.23713	1.6178	3.09355	1.12e-06	-1	D07AC Corticosteroids, potent (group III)	4.02e-06
p6m	C	D07AD	1305	13	391767	1375	0.857642	2.35759	1.35548	4.10059	0.00239	-1	D07AD Corticosteroids, very potent (group IV)	0.00467
p6m	C	D07CA	1309	9	392660	482	1.39229	4.02405	2.03157	7.9707	6.54e-05	-1	D07CA Corticosteroids, weak, combinations with antibiotics	0.000172
p6m	C	D07CC	1303	15	392104	1038	1.06484	2.90039	1.71738	4.8983	6.82e-05	-1	D07CC Corticosteroids, potent, combinations with antibiotics	0.000177
p6m	C	D09AA	1312	6	392977	165	1.66202	5.26997	2.28714	12.1429	9.52e-05	-1	D09AA Medicated dressings with antiinfectives	0.000243
p6m	C	D11AC	1312	6	392528	614	0.578156	1.78275	0.790272	4.02164	0.164	0	D11AC Medicated shampoos	0.226
p6m	C	G01AF	1304	14	392482	660	1.44486	4.24127	2.4571	7.321	2.13e-07	-1	G01AF Imidazole derivatives	8.52e-07
p6m	C	G03BA	1312	6	392408	734	0.300486	1.35052	0.597843	3.05079	0.47	0	G03BA 3-oxoandrosten (4) derivatives	0.537
p6m	C	G03CA	1284	34	383423	9719	0.36921	1.44659	1.02054	2.05051	0.0381	-1	G03CA Natural and semisynthetic estrogens, plain	0.0604
p6m	C	G04BD	1280	38	385895	7247	-0.000531517	0.999469	0.719624	1.38814	0.998	0	G04BD Urinary antispasmodics	0.998
p6m	C	G04BE	1273	45	385919	7223	0.21382	1.2384	0.912402	1.68088	0.17	0	G04BE Drugs used in erectile dysfunction	0.232
p6m	C	G04CA	1311	7	392189	953	0.193494	1.21348	0.570446	2.58138	0.615	0	G04CA Alpha-adrenoreceptor antagonists	0.668
p6m	C	G04CB	1286	32	386614	6528	-0.119565	0.887306	0.619474	1.27094	0.514	0	G04CB Testosterone-5-alpha reductase inhibitors	0.576
p6m	C	H02AA	1312	6	392771	371	1.11504	3.04968	1.34038	6.93874	0.00785	-1	H02AA Mineralocorticoids	0.0145
p6m	C	H02AB	1196	122	386491	6651	1.40967	4.09459	3.35398	4.99875	1.34e-43	-1	H02AB Glucocorticoids	4.72e-42
p6m	C	H03AA	1237	81	367529	25613	-0.229981	0.794548	0.630636	1.00106	0.0511	0	H03AA Thyroid hormones	0.0789
p6m	C	J01AA	1198	120	389325	3817	1.93996	6.95847	5.68618	8.51545	4.61e-79	-1	J01AA Tetracyclines [DG:DG01197]	4.06e-77
p6m	C	J01CA	1161	157	388974	4168	2.18624	8.9017	7.44933	10.6372	8.76e-128	-1	J01CA Penicillins with extended spectrum [DG:DG01780]	1.54e-125
p6m	C	J01CE	1310	8	392188	954	0.632834	1.88294	0.932887	3.80053	0.0774	0	J01CE Beta-lactamase sensitive penicillins [DG:DG01778]	0.115
p6m	C	J01CF	1239	79	389139	4003	1.4853	4.41627	3.48611	5.59461	8.25e-35	-1	J01CF Beta-lactamase resistant penicillins [DG:DG01779]	2.42e-33
p6m	C	J01CR	1273	45	391685	1457	1.90276	6.70439	4.9076	9.15903	6.28e-33	-1	J01CR Combinations of penicillins, incl. beta-lactamase inhibitors	1.23e-31
p6m	C	J01DB	1303	15	392173	969	1.15505	3.17418	1.88509	5.3448	1.4e-05	-1	J01DB First-generation cephalosporins [DG:DG01774]	4.18e-05
p6m	C	J01EA	1288	30	391541	1601	1.31747	3.73398	2.56282	5.44034	6.85e-12	-1	J01EA Trimethoprim and derivatives [DG:DG01581]	4.47e-11
p6m	C	J01EE	1312	6	392930	212	1.60248	4.96535	2.16036	11.4123	0.000161	-1	J01EE Combinations of sulfonamides and trimethoprim, incl. derivatives	0.000388
p6m	C	J01FA	1265	53	390713	2429	1.45444	4.28209	3.19851	5.73276	1.51e-22	-1	J01FA Macrolides [DG:DG01551]	2.04e-21
p6m	C	J01FF	1313	5	393018	124	1.8531	6.37955	2.46534	16.5084	0.000133	-1	J01FF Lincosamides [DG:DG01578]	0.000334
p6m	C	J01MA	1304	14	392374	768	1.22874	3.41692	1.9908	5.86466	8.27e-06	-1	J01MA Fluoroquinolones [DG:DG01549]	2.6e-05
p6m	C	J01XE	1234	84	387245	5897	1.33816	3.81203	3.0331	4.791	1.8e-30	-1	J01XE Nitrofuran derivatives	3.17e-29
p6m	C	J02AC	1306	12	392511	631	1.56137	4.76534	2.66265	8.52849	1.46e-07	-1	J02AC Triazole derivatives	6.12e-07
p6m	C	J05AB	1303	15	391838	1304	1.21031	3.35454	2.00064	5.62466	4.44e-06	-1	J05AB Nucleosides and nucleotides excl. reverse transcriptase inhibitors [DG:DG02840]	1.47e-05
p6m	C	L01BC	1312	6	392598	544	1.28576	3.61743	1.60931	8.13129	0.00186	-1	L01BC Pyrimidine analogues	0.00381
p6m	C	L02AE	1307	11	392154	988	0.83657	2.30843	1.25559	4.24411	0.00709	-1	L02AE Gonadotropin releasing hormone analogues	0.0133
p6m	C	L02BG	1309	9	390266	2876	0.0455959	1.04665	0.54008	2.02837	0.893	0	L02BG Aromatase inhibitors [DG:DG01596]	0.926
p6m	C	L04AA	1312	6	392699	443	0.982362	2.67076	1.17919	6.04899	0.0185	-1	L04AA Selective immunosuppressants	0.031
p6m	C	L04AX	1305	13	389875	3267	-0.0509894	0.950289	0.54807	1.64769	0.856	0	L04AX Other immunosuppressants	0.902
p6m	C	M01AB	1311	7	392361	781	0.761639	2.14178	1.01021	4.54089	0.047	-1	M01AB Acetic acid derivatives and related substances	0.0739
p6m	C	M01AE	1271	47	384683	8459	0.398086	1.48897	1.10967	1.99792	0.00796	-1	M01AE Propionic acid derivatives	0.0146
p6m	C	M01AH	1312	6	392365	777	0.648392	1.91246	0.852281	4.29144	0.116	0	M01AH Coxibs	0.167
p6m	C	M02AA	1233	85	385354	7788	0.747578	2.11188	1.68219	2.65133	1.19e-10	-1	M02AA Antiinflammatory preparations, non-steroids for topical use	6.98e-10
p6m	C	M03BX	1306	12	392444	698	1.09637	2.99328	1.66372	5.38534	0.000253	-1	M03BX Other centrally acting agents	0.000578
p6m	C	M04AA	1265	53	385659	7483	0.105527	1.1113	0.834455	1.47998	0.47	0	M04AA Preparations inhibiting uric acid production	0.537
p6m	C	M04AC	1307	11	392329	813	0.76614	2.15144	1.16337	3.97872	0.0146	-1	M04AC Preparations with no effect on uric acid metabolism	0.0252
p6m	C	M05BA	1262	56	383579	9563	0.562525	1.7551	1.33323	2.31045	6.06e-05	-1	M05BA Bisphosphonates [DG:DG01600]	0.000162
p6m	C	N01BB	1304	14	392419	723	1.20864	3.34893	1.9441	5.76891	1.33e-05	-1	N01BB Amides	4.04e-05
p6m	C	N01BX	1313	5	392804	338	0.90252	2.46581	1.00633	6.04196	0.0484	-1	N01BX Other local anesthetics	0.0754
p6m	C	N02AA	1230	88	389760	3382	1.45622	4.28973	3.38631	5.43416	1.56e-33	-1	N02AA Natural opium alkaloids	3.43e-32
p6m	C	N02AB	1308	10	392695	447	1.0186	2.76932	1.45067	5.2866	0.00202	-1	N02AB Phenylpiperidine derivatives	0.00399
p6m	C	N02AE	1294	24	391776	1366	0.864127	2.37293	1.55651	3.61758	5.91e-05	-1	N02AE Oripavine derivatives	0.00016
p6m	C	N02AJ	1217	101	381011	12131	0.485976	1.62576	1.31797	2.00544	5.68e-06	-1	N02AJ Opioids in combination with non-opioid analgesics	1.82e-05
p6m	C	N02AX	1282	36	388889	4253	0.250256	1.28435	0.912019	1.80869	0.152	0	N02AX Other opioids	0.212
p6m	C	N02BE	1004	314	364531	28611	0.872328	2.39247	2.07876	2.75354	4.91e-34	-1	N02BE Anilides	1.23e-32
p6m	C	N02BG	1312	6	392868	274	1.27354	3.5735	1.569	8.13888	0.00243	-1	N02BG Other analgesics and antipyretics	0.0047
p6m	C	N02CC	1311	7	390569	2573	-0.0723001	0.930252	0.440151	1.96607	0.85	0	N02CC Selective serotonin (5HT1) agonists [DG:DG01943]	0.901
p6m	C	N03AB	1313	5	392753	389	0.95124	2.58892	1.05573	6.34867	0.0377	-1	N03AB Hydantoin derivatives	0.0604
p6m	C	N03AF	1307	11	391953	1189	0.639773	1.89605	1.03573	3.47098	0.0381	-1	N03AF Carboxamide derivatives	0.0604
p6m	C	N03AG	1309	9	392133	1009	0.201364	1.22307	0.61636	2.42699	0.565	0	N03AG Fatty acid derivatives	0.621
p6m	C	N03AX	1186	132	381073	12069	0.710741	2.0355	1.67941	2.46709	4.36e-13	-1	N03AX Other antiepileptics	3.2e-12
p6m	C	N04BA	1294	24	391095	2047	0.991277	2.69467	1.78375	4.07079	2.49e-06	-1	N04BA Dopa and dopa derivatives	8.59e-06
p6m	C	N04BB	1313	5	392965	177	2.03761	7.67225	3.11704	18.8844	9.26e-06	-1	N04BB Adamantane derivatives	2.86e-05
p6m	C	N04BC	1303	15	391805	1337	0.86057	2.36451	1.40253	3.98629	0.00124	-1	N04BC Dopamine agonists	0.00263
p6m	C	N04BD	1312	6	392691	451	1.29214	3.64055	1.60572	8.25402	0.00198	-1	N04BD Monoamine oxidase B inhibitors	0.00399
p6m	C	N05AB	1295	23	391541	1601	1.15494	3.17382	2.07971	4.84353	8.56e-08	-1	N05AB Phenothiazines with piperazine structure	3.67e-07
p6m	C	N05AD	1310	8	393036	106	2.60797	13.5715	6.41921	28.6929	8.66e-12	-1	N05AD Butyrophenone derivatives [DG:DG01940]	5.44e-11
p6m	C	N05AH	1308	10	391863	1279	0.198889	1.22005	0.643625	2.31271	0.542	0	N05AH Diazepines, oxazepines and thiazepines	0.604
p6m	C	N05AX	1298	20	392498	644	1.34124	3.82378	2.36822	6.17397	4.09e-08	-1	N05AX Other antipsychotics	1.85e-07
p6m	C	N05BA	1272	46	390891	2251	1.42017	4.13783	3.0414	5.62953	1.55e-19	-1	N05BA Benzodiazepine derivatives [DG:DG01914]	1.7e-18
p6m	C	N05CD	1285	33	392415	727	2.08201	8.0206	5.53873	11.6146	3.04e-28	-1	N05CD Benzodiazepine derivatives	4.46e-27
p6m	C	N05CF	1288	30	390209	2933	0.685844	1.98545	1.36769	2.88224	0.00031	-1	N05CF Benzodiazepine related drugs	0.000699
p6m	C	N05CH	1313	5	392822	320	0.878244	2.40667	0.972463	5.95607	0.0575	0	N05CH Melatonin receptor agonists	0.088
p6m	C	N06AA	1236	82	379961	13181	0.284215	1.32872	1.05412	1.67484	0.0161	-1	N06AA Non-selective monoamine reuptake inhibitors [DG:DG01730]	0.0274
p6m	C	N06AB	1200	118	372620	20522	0.237535	1.26812	1.03206	1.55818	0.0238	-1	N06AB Selective serotonin reuptake inhibitors	0.0391
p6m	C	N06AX	1234	84	385054	8088	0.600219	1.82252	1.43401	2.31628	9.25e-07	-1	N06AX Other antidepressants	3.39e-06
p6m	C	N06DA	1289	29	391429	1713	0.916008	2.49929	1.6455	3.7961	1.74e-05	-1	N06DA Anticholinesterases	5.1e-05
p6m	C	N06DX	1287	31	392296	846	1.76673	5.85171	3.9039	8.77134	1.18e-17	-1	N06DX Other anti-dementia drugs	1.22e-16
p6m	C	N07CA	1301	17	391129	2013	0.42731	1.53313	0.94115	2.49746	0.0861	0	N07CA Antivertigo preparations	0.127
p6m	C	P01AB	1306	12	392681	461	1.75526	5.78493	3.18649	10.5023	7.98e-09	-1	P01AB Nitroimidazole derivatives	4.13e-08
p6m	C	P01BA	1308	10	391813	1329	0.521261	1.68415	0.896955	3.16221	0.105	0	P01BA Aminoquinolines	0.153
p6m	C	P01BC	1292	26	390215	2927	0.269148	1.30885	0.876552	1.95434	0.188	0	P01BC Methanolquinolines	0.253
p6m	C	R01AD	1260	58	381243	11899	0.121784	1.12951	0.863923	1.47674	0.373	0	R01AD Corticosteroids	0.45
p6m	C	R01AX	1313	5	392981	161	1.98084	7.24881	2.92378	17.9717	1.9e-05	-1	R01AX Other nasal preparations	5.48e-05
p6m	C	R03AC	1163	155	377701	15441	0.780421	2.18239	1.7846	2.66885	2.94e-14	-1	R03AC Selective beta-2-adrenoreceptor agonists	2.35e-13
p6m	C	R03AK	1229	89	379736	13406	0.308633	1.36156	1.06602	1.73905	0.0134	-1	R03AK Adrenergics in combination with corticosteroids or other drugs, excl. anticholinergics	0.0234
p6m	C	R03AL	1293	25	390974	2168	0.547948	1.7297	1.13244	2.64196	0.0112	-1	R03AL Adrenergics in combination with anticholinergics incl. triple combinations with corticosteroids	0.0199
p6m	C	R03BA	1287	31	386444	6698	0.156393	1.16929	0.80861	1.69084	0.406	0	R03BA Glucocorticoids	0.486
p6m	C	R03BB	1285	33	388919	4223	0.155074	1.16774	0.804659	1.69466	0.414	0	R03BB Anticholinergics	0.486
p6m	C	R03DA	1313	5	392713	429	0.233632	1.26318	0.510249	3.12715	0.614	0	R03DA Xanthines	0.668
p6m	C	R03DC	1307	11	390577	2565	-0.311834	0.732103	0.398285	1.34571	0.315	0	R03DC Leukotriene receptor antagonists	0.388
p6m	C	R05CB	1286	32	390617	2525	0.596088	1.815	1.24345	2.64928	0.00201	-1	R05CB Mucolytics	0.00399
p6m	C	R05DA	1265	53	388233	4909	0.809026	2.24572	1.69528	2.97489	1.71e-08	-1	R05DA Opium alkaloids and derivatives	8.36e-08
p6m	C	R06AB	1308	10	392582	560	1.14743	3.15008	1.66341	5.96546	0.000429	-1	R06AB Substituted alkylamines	0.000956
p6m	C	R06AD	1308	10	392619	523	1.2058	3.33944	1.76724	6.31033	0.000204	-1	R06AD Phenothiazine derivatives	0.000479
p6m	C	R06AE	1236	82	387786	5356	1.12605	3.08345	2.43952	3.89734	4.46e-21	-1	R06AE Piperazine derivatives	5.61e-20
p6m	C	R06AX	1280	38	386236	6906	0.170258	1.18561	0.852538	1.64881	0.312	0	R06AX Other antihistamines for systemic use	0.387
p6m	C	S01AA	1295	23	391960	1182	1.43139	4.18453	2.73428	6.40398	4.32e-11	-1	S01AA Antibiotics	2.62e-10
p6m	C	S01BA	1312	6	392456	686	0.621099	1.86097	0.826736	4.18903	0.134	0	S01BA Corticosteroids, plain	0.19
p6m	C	S01EC	1308	10	390622	2520	-0.129561	0.878481	0.46939	1.64411	0.685	0	S01EC Carbonic anhydrase inhibitors	0.735
p6m	C	S01ED	1309	9	389496	3646	-0.48579	0.615211	0.31833	1.18897	0.148	0	S01ED Beta blocking agents	0.208
p6m	C	S01EE	1298	20	387111	6031	-0.283938	0.752814	0.482133	1.17546	0.212	0	S01EE Prostaglandin analogues	0.276
p6m	C	S01GX	1308	10	391767	1375	0.3705	1.44846	0.770638	2.72246	0.25	0	S01GX Other antiallergics	0.321
p6m	C	S01XA	1248	70	380151	12991	0.164881	1.17925	0.920496	1.51075	0.192	0	S01XA Other ophthalmologicals	0.256
p6m	C	S02AA	1313	5	392761	381	1.09391	2.98591	1.22446	7.28133	0.0162	-1	S02AA Antiinfectives	0.0274
p6m	C	V03AE	1309	9	393041	101	2.04563	7.734	3.58083	16.7042	1.92e-07	-1	V03AE Drugs for treatment of hyperkalemia and hyperphosphatemia	7.86e-07
p6m	C	V06DC	1312	6	393001	141	1.42306	4.14979	1.74804	9.85146	0.00126	-1	V06DC Carbohydrates	0.00264
p6m	C	V07AY	1256	62	389076	4066	0.724918	2.06456	1.55873	2.73455	4.3e-07	-1	V07AY Other non-therapeutic auxiliary products	1.65e-06
p6m	D	A02BA	162	8	390176	2966	1.18351	3.26581	1.56735	6.80481	0.00158	-1	A02BA H2-receptor antagonists [DG:DG01481]	0.00312
p6m	D	A02BC	107	63	321442	71700	0.301403	1.35175	0.969439	1.88484	0.0756	0	A02BC Proton pump inhibitors [DG:DG01646]	0.105
p6m	D	A02BX	161	9	388391	4751	0.943338	2.56854	1.28947	5.11637	0.0073	-1	A02BX Other drugs for peptic ulcer and gastro-oesophageal reflux disease (GORD)	0.0124
p6m	D	A03BB	152	18	391773	1369	3.13644	23.0217	13.665	38.7849	4.69e-32	-1	A03BB Belladonna alkaloids, semisynthetic, quaternary ammonium compounds	9.73e-31
p6m	D	A03FA	162	8	392314	828	2.67144	14.4607	6.87707	30.4073	1.86e-12	-1	A03FA Propulsives [DG:DG01763]	9.08e-12
p6m	D	A06AA	158	12	390791	2351	1.54455	4.68585	2.53196	8.67202	8.75e-07	-1	A06AA Softeners, emollients	2.5e-06
p6m	D	A06AB	136	34	390079	3063	2.38139	10.8199	7.11363	16.4571	9.1e-29	-1	A06AB Contact laxatives	1.51e-27
p6m	D	A06AD	131	39	383979	9163	1.72673	5.62221	3.86087	8.1871	2.17e-19	-1	A06AD Osmotically acting laxatives	2.39e-18
p6m	D	A07AA	165	5	392442	700	2.41276	11.1647	4.46311	27.929	2.5e-07	-1	A07AA Antibiotics	7.41e-07
p6m	D	A07DA	164	6	391115	2027	1.24885	3.48635	1.50127	8.09621	0.00367	-1	A07DA Antipropulsives	0.00677
p6m	D	A10AB	153	17	387223	5919	1.15341	3.16898	1.68571	5.95741	0.000342	-1	A10AB Insulins and analogues for injection, fast-acting	0.000789
p6m	D	A10AD	165	5	391869	1273	0.931339	2.5379	0.962256	6.6936	0.0598	0	A10AD Insulins and analogues for injection, intermediate- or long-acting combined with fast-acting	0.0871
p6m	D	A10AE	163	7	391195	1947	1.09855	2.99981	1.28899	6.98132	0.0108	-1	A10AE Insulins and analogues for injection, long-acting	0.0176
p6m	D	A10BA	154	16	375684	17458	-0.278058	0.757253	0.416295	1.37746	0.362	0	A10BA Biguanides [DG:DG01684]	0.442
p6m	D	A10BB	164	6	388238	4904	-0.125223	0.8823	0.367842	2.11627	0.779	0	A10BB Sulfonylureas	0.808
p6m	D	A10BH	163	7	388544	4598	0.0529746	1.0544	0.462429	2.40419	0.9	0	A10BH Dipeptidyl peptidase 4 (DPP-4) inhibitors [DG:DG01601]	0.9
p6m	D	A11CC	161	9	389402	3740	1.03757	2.82236	1.39666	5.70338	0.00384	-1	A11CC Vitamin D and analogues	0.00693
p6m	D	A11DA	161	9	391982	1160	2.02993	7.61353	3.67303	15.7815	4.81e-08	-1	A11DA Vitamin B1, plain	1.54e-07
p6m	D	A12AX	144	26	368867	24275	0.600102	1.8223	1.17374	2.82924	0.0075	-1	A12AX Calcium, combinations with vitamin D and/or other drugs	0.0124
p6m	D	B01AC	131	39	360572	32570	0.149398	1.16114	0.783416	1.72097	0.457	0	B01AC Platelet aggregation inhibitors excl. heparin	0.534
p6m	D	B01AF	145	25	379720	13422	0.643491	1.90311	1.22487	2.95692	0.00421	-1	B01AF Direct factor Xa inhibitors	0.00743
p6m	D	B03AA	152	18	388952	4190	1.39808	4.04744	2.39325	6.845	1.84e-07	-1	B03AA Iron bivalent, oral preparations	5.66e-07
p6m	D	B03BA	162	8	389070	4072	0.936596	2.55128	1.23959	5.25094	0.011	-1	B03BA Vitamin B12 (cyanocobalamin and analogues)	0.0176
p6m	D	B03BB	151	19	387909	5233	1.53032	4.61966	2.8188	7.57105	1.27e-09	-1	B03BB Folic acid and derivatives	5.27e-09
p6m	D	C01AA	164	6	391313	1829	0.787975	2.19894	0.945622	5.11339	0.0672	0	C01AA Digitalis glycosides [DG:DG01697]	0.0945
p6m	D	C01DA	161	9	387790	5352	0.0894726	1.0936	0.526206	2.27279	0.81	0	C01DA Organic nitrates	0.829
p6m	D	C02CA	164	6	386564	6578	-0.30696	0.73568	0.319607	1.69341	0.47	0	C02CA Alpha-adrenoreceptor antagonists	0.534
p6m	D	C03AA	162	8	381539	11603	-0.214631	0.806839	0.389615	1.67085	0.563	0	C03AA Thiazides, plain [DG:DG01749]	0.623
p6m	D	C03BA	159	11	387003	6139	0.897435	2.4533	1.30961	4.59579	0.00508	-1	C03BA Sulfonamides, plain	0.00878
p6m	D	C03CA	145	25	385186	7956	0.824598	2.28096	1.42619	3.64805	0.000578	-1	C03CA Sulfonamides, plain	0.00126
p6m	D	C07AB	130	40	360608	32534	0.246109	1.27904	0.866219	1.8886	0.216	0	C07AB Beta blocking agents, selective	0.28
p6m	D	C08CA	135	35	344730	48412	-0.102878	0.902237	0.612097	1.32991	0.603	0	C08CA Dihydropyridine derivatives [DG:DG01928]	0.65
p6m	D	C09AA	139	31	347068	46074	-0.261216	0.770114	0.512963	1.15618	0.208	0	C09AA ACE inhibitors, plain [DG:DG01501]	0.274
p6m	D	C09CA	150	20	367332	25810	-0.107089	0.898445	0.555398	1.45338	0.663	0	C09CA Angiotensin II receptor blockers, plain [DG:DG01495]	0.706
p6m	D	C10AA	95	75	291331	101811	-0.0919709	0.912132	0.662095	1.25659	0.574	0	C10AA HMG CoA reductase inhibitors [DG:DG01660]	0.627
p6m	D	D01AC	153	17	389431	3711	1.75089	5.75971	3.39725	9.76502	8.02e-11	-1	D01AC Imidazole and triazole derivatives	3.7e-10
p6m	D	D02AE	165	5	392351	791	2.04456	7.72573	3.12342	19.1095	9.65e-06	-1	D02AE Carbamide products	2.58e-05
p6m	D	D02AX	138	32	383910	9232	1.53108	4.62315	3.08038	6.93862	1.46e-13	-1	D02AX Other emollients and protectives	9.32e-13
p6m	D	D07AC	161	9	389167	3975	1.24463	3.47165	1.75861	6.85334	0.000335	-1	D07AC Corticosteroids, potent (group III)	0.000789
p6m	D	G04BD	161	9	385895	7247	0.414062	1.51295	0.762909	3.00038	0.236	0	G04BD Urinary antispasmodics	0.297
p6m	D	G04BE	162	8	385919	7223	0.521656	1.68481	0.815147	3.48232	0.159	0	G04BE Drugs used in erectile dysfunction	0.213
p6m	D	G04CA	165	5	392189	953	1.55795	4.74908	1.91093	11.8025	0.000796	-1	G04CA Alpha-adrenoreceptor antagonists	0.00169
p6m	D	G04CB	164	6	386614	6528	-0.319513	0.726503	0.31724	1.66374	0.45	0	G04CB Testosterone-5-alpha reductase inhibitors	0.534
p6m	D	H02AB	144	26	386491	6651	1.87487	6.51998	4.19215	10.1404	8.81e-17	-1	H02AB Glucocorticoids	6.65e-16
p6m	D	H03AA	151	19	367529	25613	0.416959	1.51734	0.920259	2.50182	0.102	0	H03AA Thyroid hormones	0.139
p6m	D	J01AA	148	22	389325	3817	2.25289	9.51518	5.89889	15.3484	2.59e-20	-1	J01AA Tetracyclines [DG:DG01197]	3.58e-19
p6m	D	J01CA	136	34	388974	4168	2.62235	13.768	9.25733	20.4766	2.44e-38	-1	J01CA Penicillins with extended spectrum [DG:DG01780]	6.75e-37
p6m	D	J01CF	149	21	389139	4003	2.04578	7.73516	4.79683	12.4734	4.81e-17	-1	J01CF Beta-lactamase resistant penicillins [DG:DG01779]	4.44e-16
p6m	D	J01CR	160	10	391685	1457	2.41027	11.1369	5.73662	21.621	1.07e-12	-1	J01CR Combinations of penicillins, incl. beta-lactamase inhibitors	5.55e-12
p6m	D	J01EA	163	7	391541	1601	1.4604	4.30768	1.94153	9.55746	0.000329	-1	J01EA Trimethoprim and derivatives [DG:DG01581]	0.000789
p6m	D	J01FA	159	11	390713	2429	1.9317	6.90126	3.61722	13.1668	4.61e-09	-1	J01FA Macrolides [DG:DG01551]	1.66e-08
p6m	D	J01XE	150	20	387245	5897	1.81422	6.13629	3.76637	9.99743	3.22e-13	-1	J01XE Nitrofuran derivatives	1.91e-12
p6m	D	M01AE	163	7	384683	8459	0.728242	2.07144	0.9654	4.44463	0.0615	0	M01AE Propionic acid derivatives	0.088
p6m	D	M02AA	153	17	385354	7788	0.949106	2.5834	1.54282	4.32582	0.000308	-1	M02AA Antiinflammatory preparations, non-steroids for topical use	0.000775
p6m	D	M04AA	161	9	385659	7483	0.0815064	1.08492	0.540156	2.1791	0.819	0	M04AA Preparations inhibiting uric acid production	0.829
p6m	D	M05BA	153	17	383579	9563	1.2652	3.54379	2.09553	5.99297	2.36e-06	-1	M05BA Bisphosphonates [DG:DG01600]	6.53e-06
p6m	D	N02AA	136	34	389760	3382	2.78071	16.1305	10.6323	24.472	4.63e-39	-1	N02AA Natural opium alkaloids	1.92e-37
p6m	D	N02AE	159	11	391776	1366	1.96411	7.12853	3.7285	13.6291	2.86e-09	-1	N02AE Oripavine derivatives	1.08e-08
p6m	D	N02AJ	151	19	381011	12131	0.804557	2.23571	1.36844	3.65261	0.00132	-1	N02AJ Opioids in combination with non-opioid analgesics	0.00267
p6m	D	N02AX	165	5	388889	4253	0.351751	1.42155	0.570787	3.54041	0.45	0	N02AX Other opioids	0.534
p6m	D	N02BE	96	74	364531	28611	1.52359	4.58865	3.29277	6.39453	2.3e-19	-1	N02BE Anilides	2.39e-18
p6m	D	N03AX	139	31	381073	12069	1.347	3.84588	2.54219	5.81813	1.8e-10	-1	N03AX Other antiepileptics	7.86e-10
p6m	D	N04BA	163	7	391095	2047	1.27741	3.58733	1.65213	7.78929	0.00124	-1	N04BA Dopa and dopa derivatives	0.00257
p6m	D	N05AD	164	6	393036	106	3.92771	50.7904	20.1391	128.092	8.68e-17	-1	N05AD Butyrophenone derivatives [DG:DG01940]	6.65e-16
p6m	D	N05AX	162	8	392498	644	2.27015	9.68081	4.29046	21.8434	4.56e-08	-1	N05AX Other antipsychotics	1.51e-07
p6m	D	N05BA	155	15	390891	2251	2.35328	10.5201	5.98348	18.4962	2.99e-16	-1	N05BA Benzodiazepine derivatives [DG:DG01914]	2.07e-15
p6m	D	N05CD	145	25	392415	727	3.72076	41.2958	25.7852	66.1364	4.58e-54	-1	N05CD Benzodiazepine derivatives	3.8e-52
p6m	D	N06AA	159	11	379961	13181	0.36624	1.4423	0.771753	2.69547	0.251	0	N06AA Non-selective monoamine reuptake inhibitors [DG:DG01730]	0.311
p6m	D	N06AB	150	20	372620	20522	0.635396	1.88777	1.13076	3.15158	0.0151	-1	N06AB Selective serotonin reuptake inhibitors	0.0236
p6m	D	N06AX	155	15	385054	8088	0.873787	2.39597	1.34987	4.25277	0.00284	-1	N06AX Other antidepressants	0.00536
p6m	D	N06DA	160	10	391429	1713	0.812014	2.25244	1.04861	4.83827	0.0374	-1	N06DA Anticholinesterases	0.0564
p6m	D	N06DX	157	13	392296	846	2.06146	7.85741	4.02709	15.3309	1.5e-09	-1	N06DX Other anti-dementia drugs	5.93e-09
p6m	D	R01AD	164	6	381243	11899	-0.11794	0.88875	0.390499	2.02274	0.779	0	R01AD Corticosteroids	0.808
p6m	D	R03AC	149	21	377701	15441	0.993931	2.70183	1.54812	4.71532	0.000469	-1	R03AC Selective beta-2-adrenoreceptor agonists	0.00105
p6m	D	R03AK	160	10	379736	13406	0.443804	1.55863	0.754458	3.21994	0.231	0	R03AK Adrenergics in combination with corticosteroids or other drugs, excl. anticholinergics	0.295
p6m	D	R03AL	164	6	390974	2168	0.909248	2.48245	1.00386	6.13887	0.049	-1	R03AL Adrenergics in combination with anticholinergics incl. triple combinations with corticosteroids	0.0726
p6m	D	R05CB	162	8	390617	2525	1.21371	3.36595	1.54242	7.34538	0.0023	-1	R05CB Mucolytics	0.00444
p6m	D	R05DA	162	8	388233	4909	0.820982	2.27273	1.1052	4.67363	0.0256	-1	R05DA Opium alkaloids and derivatives	0.0393
p6m	D	R06AE	154	16	387786	5356	1.56643	4.78954	2.80617	8.17473	9.32e-09	-1	R06AE Piperazine derivatives	3.22e-08
p6m	D	R06AX	165	5	386236	6906	0.337763	1.40181	0.566404	3.46937	0.465	0	R06AX Other antihistamines for systemic use	0.534
p6m	D	S01AA	160	10	391960	1182	2.46671	11.7836	6.03969	22.9901	4.71e-13	-1	S01AA Antibiotics	2.61e-12
p6m	D	S01XA	159	11	380151	12991	0.199887	1.22126	0.654719	2.27805	0.53	0	S01XA Other ophthalmologicals	0.594
p6m	D	V07AY	156	14	389076	4066	1.38237	3.98433	2.14122	7.41395	1.28e-05	-1	V07AY Other non-therapeutic auxiliary products	3.32e-05
p6m	E	A01AB	3791	67	390749	2393	0.925244	2.52248	1.9684	3.23254	2.64e-13	-1	A01AB Antiinfectives and antiseptics for local oral treatment	2.28e-12
p6m	E	A01AD	3838	20	392584	558	1.1027	3.0123	1.90886	4.75359	2.16e-06	-1	A01AD Other agents for local oral treatment	7.84e-06
p6m	E	A02BA	3807	51	390176	2966	0.354585	1.42559	1.07383	1.89258	0.0142	-1	A02BA H2-receptor antagonists [DG:DG01481]	0.0272
p6m	E	A02BC	2870	988	321442	71700	0.341132	1.40654	1.29983	1.52201	2.38e-17	-1	A02BC Proton pump inhibitors [DG:DG01646]	2.35e-16
p6m	E	A02BX	3755	103	388391	4751	0.676424	1.96683	1.60635	2.40821	5.82e-11	-1	A02BX Other drugs for peptic ulcer and gastro-oesophageal reflux disease (GORD)	3.56e-10
p6m	E	A03AA	3828	30	390973	2169	0.191817	1.21145	0.840863	1.74536	0.303	0	A03AA Synthetic anticholinergics, esters with tertiary amino group	0.378
p6m	E	A03AX	3844	14	392272	870	0.307081	1.35945	0.796968	2.31893	0.26	0	A03AX Other drugs for functional gastrointestinal disorders	0.338
p6m	E	A03BB	3805	53	391773	1369	1.11535	3.05065	2.29668	4.05214	1.36e-14	-1	A03BB Belladonna alkaloids, semisynthetic, quaternary ammonium compounds	1.28e-13
p6m	E	A03FA	3830	28	392314	828	0.942295	2.56586	1.74433	3.77432	1.71e-06	-1	A03FA Propulsives [DG:DG01763]	6.32e-06
p6m	E	A04AA	3852	6	392969	173	1.01387	2.75625	1.20531	6.30288	0.0163	-1	A04AA Serotonin (5HT3) antagonists	0.0304
p6m	E	A05AA	3851	7	392750	392	0.608081	1.8369	0.867571	3.88926	0.112	0	A05AA Bile acid and derivatives [DG:DG01956]	0.167
p6m	E	A06AA	3769	89	390791	2351	1.09866	3.00014	2.40256	3.74635	3.2e-22	-1	A06AA Softeners, emollients	4.14e-21
p6m	E	A06AB	3711	147	390079	3063	1.27774	3.58851	3.0004	4.29189	1.8e-44	-1	A06AB Contact laxatives	7.45e-43
p6m	E	A06AC	3847	11	391717	1425	-0.170993	0.842827	0.464424	1.52955	0.574	0	A06AC Bulk-forming laxatives	0.629
p6m	E	A06AD	3605	253	383979	9163	1.00731	2.73822	2.39318	3.13302	1.23e-48	-1	A06AD Osmotically acting laxatives	6.37e-47
p6m	E	A06AG	3846	12	393008	134	1.94323	6.98123	3.78234	12.8856	5.16e-10	-1	A06AG Enemas	2.89e-09
p6m	E	A06AX	3845	13	392673	469	0.891956	2.4399	1.39449	4.26901	0.00178	-1	A06AX Other drugs for constipation	0.00428
p6m	E	A07AA	3828	30	392442	700	1.30185	3.6761	2.53083	5.33963	8.2e-12	-1	A07AA Antibiotics	6.29e-11
p6m	E	A07DA	3805	53	391115	2027	0.806418	2.23987	1.69123	2.96649	1.85e-08	-1	A07DA Antipropulsives	9.12e-08
p6m	E	A07EC	3826	32	390543	2599	0.111886	1.11839	0.786433	1.59046	0.533	0	A07EC Aminosalicylic acid and similar agents	0.596
p6m	E	A08AB	3850	8	392954	188	0.801984	2.22996	1.09023	4.56115	0.028	-1	A08AB Peripherally acting antiobesity products	0.0504
p6m	E	A09AB	3853	5	393111	31	2.62602	13.8186	5.25804	36.3167	1e-07	-1	A09AB Acid preparations	4.5e-07
p6m	E	A10AB	3731	127	387223	5919	0.338358	1.40264	1.14313	1.72106	0.00119	-1	A10AB Insulins and analogues for injection, fast-acting	0.0029
p6m	E	A10AC	3839	19	392389	753	0.355784	1.4273	0.89247	2.28263	0.138	0	A10AC Insulins and analogues for injection, intermediate-acting	0.196
p6m	E	A10AD	3821	37	391869	1273	0.508537	1.66286	1.17901	2.34527	0.00375	-1	A10AD Insulins and analogues for injection, intermediate- or long-acting combined with fast-acting	0.00837
p6m	E	A10AE	3827	31	391195	1947	-0.117135	0.889465	0.613577	1.2894	0.536	0	A10AE Insulins and analogues for injection, long-acting	0.597
p6m	E	A10BA	3587	271	375684	17458	0.0629593	1.06498	0.916575	1.23742	0.411	0	A10BA Biguanides [DG:DG01684]	0.486
p6m	E	A10BB	3774	84	388238	4904	0.100254	1.10545	0.872973	1.39984	0.405	0	A10BB Sulfonylureas	0.482
p6m	E	A10BD	3852	6	392855	287	0.139367	1.14955	0.507326	2.60475	0.738	0	A10BD Combinations of oral blood glucose lowering drugs	0.783
p6m	E	A10BG	3850	8	392553	589	-0.105879	0.899534	0.444439	1.82063	0.768	0	A10BG Thiazolidinediones [DG:DG01683]	0.809
p6m	E	A10BH	3781	77	388544	4598	0.0773663	1.08044	0.847467	1.37745	0.532	0	A10BH Dipeptidyl peptidase 4 (DPP-4) inhibitors [DG:DG01601]	0.596
p6m	E	A10BJ	3832	26	391729	1413	-0.115545	0.89088	0.596071	1.3315	0.573	0	A10BJ Glucagon-like peptide-1 receptor (GLP-1) analogues	0.629
p6m	E	A10BK	3805	53	390308	2834	0.0429106	1.04384	0.782985	1.39161	0.77	0	A10BK Sodium-glucose co-transporter 2 (SGLT2) inhibitors	0.809
p6m	E	A11CC	3774	84	389402	3740	0.582626	1.79073	1.42946	2.24331	4.02e-07	-1	A11CC Vitamin D and analogues	1.63e-06
p6m	E	A11DA	3823	35	391982	1160	0.675845	1.96569	1.38586	2.78812	0.000151	-1	A11DA Vitamin B1, plain	0.00044
p6m	E	A11EX	3850	8	392543	599	-0.213764	0.807539	0.396848	1.64325	0.555	0	A11EX Vitamin B-complex, other combinations	0.614
p6m	E	A12AA	3848	10	392667	475	0.670843	1.95588	1.03979	3.67909	0.0374	-1	A12AA Calcium	0.0645
p6m	E	A12AX	3565	293	368867	24275	0.269613	1.30946	1.15594	1.48337	2.26e-05	-1	A12AX Calcium, combinations with vitamin D and/or other drugs	7.67e-05
p6m	E	B01AA	3800	58	388932	4210	0.205066	1.22761	0.940869	1.60173	0.131	0	B01AA Vitamin K antagonists	0.188
p6m	E	B01AB	3846	12	392922	220	1.56335	4.77477	2.6407	8.63346	2.3e-07	-1	B01AB Heparin group	9.72e-07
p6m	E	B01AC	3421	437	360572	32570	0.163959	1.17817	1.04988	1.32213	0.00531	-1	B01AC Platelet aggregation inhibitors excl. heparin	0.0112
p6m	E	B01AE	3850	8	392499	643	0.268395	1.30786	0.648815	2.63636	0.453	0	B01AE Direct thrombin inhibitors	0.524
p6m	E	B01AF	3647	211	379720	13422	0.492194	1.6359	1.41534	1.89083	2.72e-11	-1	B01AF Direct factor Xa inhibitors	1.88e-10
p6m	E	B03AA	3747	111	388952	4190	0.68566	1.98508	1.62653	2.42267	1.52e-11	-1	B03AA Iron bivalent, oral preparations	1.08e-10
p6m	E	B03BA	3767	91	389070	4072	0.642473	1.90118	1.53427	2.35583	4.29e-09	-1	B03BA Vitamin B12 (cyanocobalamin and analogues)	2.17e-08
p6m	E	B03BB	3732	126	387909	5233	0.713757	2.04165	1.69706	2.45621	3.81e-14	-1	B03BB Folic acid and derivatives	3.43e-13
p6m	E	B05CB	3844	14	392957	185	1.84956	6.35704	3.64699	11.0809	6.86e-11	-1	B05CB Salt solutions	4.06e-10
p6m	E	B05XA	3851	7	392788	354	0.104042	1.10965	0.516692	2.38308	0.79	0	B05XA Electrolyte solutions	0.826
p6m	E	C01AA	3824	34	391313	1829	0.478521	1.61369	1.14056	2.28308	0.00688	-1	C01AA Digitalis glycosides [DG:DG01697]	0.0142
p6m	E	C01BD	3849	9	392669	473	0.389979	1.47695	0.749261	2.91138	0.26	0	C01BD Antiarrhythmics, class III [DG:DG01648]	0.338
p6m	E	C01CA	3848	10	392730	412	0.866213	2.37789	1.26302	4.47686	0.00729	-1	C01CA Adrenergic and dopaminergic agents	0.0149
p6m	E	C01DA	3733	125	387790	5352	0.510696	1.66645	1.36498	2.03451	5.28e-07	-1	C01DA Organic nitrates	2.1e-06
p6m	E	C01DX	3841	17	391954	1188	-0.209426	0.81105	0.495516	1.32751	0.405	0	C01DX Other vasodilators used in cardiac diseases	0.482
p6m	E	C01EB	3835	23	392236	906	0.420258	1.52236	0.993626	2.33243	0.0535	0	C01EB Other cardiac preparations	0.0893
p6m	E	C02AC	3852	6	392717	425	0.0316983	1.03221	0.458865	2.32193	0.939	0	C02AC Imidazoline receptor agonists	0.958
p6m	E	C02CA	3783	75	386564	6578	-0.103941	0.901279	0.712127	1.14067	0.387	0	C02CA Alpha-adrenoreceptor antagonists	0.471
p6m	E	C03AA	3748	110	381539	11603	-0.0670668	0.935133	0.768854	1.13737	0.502	0	C03AA Thiazides, plain [DG:DG01749]	0.571
p6m	E	C03BA	3784	74	387003	6139	0.0918316	1.09618	0.867006	1.38593	0.443	0	C03BA Sulfonamides, plain	0.515
p6m	E	C03CA	3679	179	385186	7956	0.56972	1.76777	1.50078	2.08226	9.13e-12	-1	C03CA Sulfonamides, plain	6.75e-11
p6m	E	C03DA	3810	48	390343	2799	0.244776	1.27734	0.95164	1.7145	0.103	0	C03DA Aldosterone antagonists	0.158
p6m	E	C03EB	3850	8	392884	258	0.963152	2.61994	1.28721	5.33252	0.0079	-1	C03EB High-ceiling diuretics and potassium-sparing agents	0.0157
p6m	E	C05AX	3829	29	391856	1286	0.704566	2.02297	1.39292	2.938	0.000215	-1	C05AX Other agents for treatment of hemorrhoids and anal fissures for topical use	0.00061
p6m	E	C07AA	3826	32	390241	2901	0.0445386	1.04555	0.735773	1.48574	0.804	0	C07AA Beta blocking agents, non-selective	0.836
p6m	E	C07AB	3460	398	360608	32534	0.0815888	1.08501	0.965542	1.21926	0.17	0	C07AB Beta blocking agents, selective	0.233
p6m	E	C07AG	3845	13	392698	444	0.763168	2.14506	1.22448	3.75776	0.00763	-1	C07AG Alpha and beta blocking agents	0.0153
p6m	E	C08CA	3320	538	344730	48412	0.0732157	1.07596	0.975509	1.18676	0.143	0	C08CA Dihydropyridine derivatives [DG:DG01928]	0.201
p6m	E	C08DA	3849	9	392535	607	0.286288	1.33148	0.685465	2.58631	0.398	0	C08DA Phenylalkylamine derivatives	0.48
p6m	E	C08DB	3833	25	390349	2793	-0.367276	0.692618	0.464165	1.03351	0.0721	0	C08DB Benzothiazepine derivatives	0.116
p6m	E	C09AA	3355	503	347068	46074	-0.0562213	0.94533	0.854167	1.04622	0.277	0	C09AA ACE inhibitors, plain [DG:DG01501]	0.352
p6m	E	C09CA	3571	287	367332	25810	-0.00541871	0.994596	0.876005	1.12924	0.933	0	C09CA Angiotensin II receptor blockers, plain [DG:DG01495]	0.956
p6m	E	C09DX	3850	8	392813	329	0.550877	1.73477	0.853353	3.52661	0.128	0	C09DX Angiotensin II receptor blockers (ARBs), other combinations	0.185
p6m	E	C10AA	2751	1107	291331	101811	0.0627207	1.06473	0.983621	1.15253	0.121	0	C10AA HMG CoA reductase inhibitors [DG:DG01660]	0.176
p6m	E	C10AB	3844	14	391858	1284	-0.229694	0.794777	0.466044	1.35539	0.399	0	C10AB Fibrates	0.48
p6m	E	C10AC	3849	9	392692	450	0.550774	1.73459	0.893151	3.36877	0.104	0	C10AC Bile acid sequestrants	0.158
p6m	E	C10AX	3819	39	389960	3182	-0.000835415	0.999165	0.723902	1.3791	0.996	0	C10AX Other lipid modifying agents	0.998
p6m	E	D01AC	3743	115	389431	3711	0.973795	2.64797	2.18407	3.21042	3.81e-23	-1	D01AC Imidazole and triazole derivatives	5.26e-22
p6m	E	D01AE	3846	12	392435	707	0.438544	1.55045	0.872131	2.75634	0.135	0	D01AE Other antifungals for topical use	0.193
p6m	E	D01BA	3849	9	392691	451	0.598008	1.81849	0.934228	3.53973	0.0785	0	D01BA Antifungals for systemic use	0.125
p6m	E	D02AC	3813	45	389978	3164	0.306031	1.35802	1.00628	1.83272	0.0454	-1	D02AC Soft paraffin and fat products	0.0764
p6m	E	D02AE	3840	18	392351	791	0.70594	2.02575	1.26206	3.25156	0.00346	-1	D02AE Carbamide products	0.00787
p6m	E	D02AX	3631	227	383910	9232	0.799243	2.22386	1.93225	2.55947	7.66e-29	-1	D02AX Other emollients and protectives	1.44e-27
p6m	E	D05AX	3836	22	391904	1238	0.455491	1.57695	1.02983	2.41473	0.0362	-1	D05AX Other antipsoriatics for topical use	0.063
p6m	E	D06AX	3836	22	392320	822	0.815313	2.25988	1.46091	3.49582	0.000249	-1	D06AX Other antibiotics for topical use	0.000678
p6m	E	D06BA	3853	5	393110	32	2.4136	11.1741	4.1962	29.7556	1.37e-06	-1	D06BA Sulfonamides	5.16e-06
p6m	E	D06BX	3852	6	392603	539	0.0836875	1.08729	0.483366	2.44576	0.84	0	D06BX Other chemotherapeutics	0.869
p6m	E	D07AA	3830	28	391847	1295	0.756923	2.13171	1.45836	3.11595	9.3e-05	-1	D07AA Corticosteroids, weak (group I)	0.000279
p6m	E	D07AB	3832	26	391878	1264	0.689133	1.99199	1.34453	2.95124	0.00059	-1	D07AB Corticosteroids, moderately potent (group II)	0.00153
p6m	E	D07AC	3776	82	389167	3975	0.694409	2.00253	1.60202	2.50316	1.07e-09	-1	D07AC Corticosteroids, potent (group III)	5.68e-09
p6m	E	D07AD	3833	25	391767	1375	0.590461	1.80482	1.21056	2.6908	0.00376	-1	D07AD Corticosteroids, very potent (group IV)	0.00837
p6m	E	D07CA	3844	14	392660	482	0.972021	2.64328	1.54049	4.53552	0.000418	-1	D07CA Corticosteroids, weak, combinations with antibiotics	0.00112
p6m	E	D07CC	3822	36	392104	1038	1.13465	3.11008	2.21696	4.363	5.05e-11	-1	D07CC Corticosteroids, potent, combinations with antibiotics	3.27e-10
p6m	E	D07CD	3848	10	392853	289	1.0769	2.93556	1.55206	5.55231	0.000927	-1	D07CD Corticosteroids, very potent, combinations with antibiotics	0.00234
p6m	E	D09AA	3845	13	392977	165	1.80822	6.09958	3.42112	10.875	8.86e-10	-1	D09AA Medicated dressings with antiinfectives	4.83e-09
p6m	E	D11AC	3843	15	392528	614	0.707185	2.02827	1.20923	3.40208	0.00736	-1	D11AC Medicated shampoos	0.0149
p6m	E	G01AF	3836	22	392482	660	0.980791	2.66656	1.72829	4.11423	9.3e-06	-1	G01AF Imidazole derivatives	3.26e-05
p6m	E	G03AC	3852	6	392861	281	0.414268	1.51326	0.671062	3.41245	0.318	0	G03AC Progestogens	0.394
p6m	E	G03BA	3841	17	392408	734	0.523672	1.68822	1.0353	2.7529	0.0358	-1	G03BA 3-oxoandrosten (4) derivatives	0.063
p6m	E	G03CA	3747	111	383423	9719	0.235729	1.26583	1.04287	1.53647	0.0171	-1	G03CA Natural and semisynthetic estrogens, plain	0.0316
p6m	E	G03DA	3848	10	392571	571	0.452955	1.57295	0.83884	2.94953	0.158	0	G03DA Pregnen (4) derivatives	0.218
p6m	E	G03FA	3849	9	392698	444	0.627822	1.87353	0.965185	3.63671	0.0636	0	G03FA Progestogens and estrogens, fixed combinations	0.104
p6m	E	G03FB	3842	16	392522	620	0.831465	2.29668	1.39246	3.78807	0.00113	-1	G03FB Progestogens and estrogens, sequential preparations	0.00278
p6m	E	G04BD	3762	96	385895	7247	0.173702	1.1897	0.96676	1.46405	0.101	0	G04BD Urinary antispasmodics	0.157
p6m	E	G04BE	3748	110	385919	7223	0.28363	1.32794	1.09196	1.61491	0.00449	-1	G04BE Drugs used in erectile dysfunction	0.00985
p6m	E	G04CA	3844	14	392189	953	0.301609	1.35203	0.792641	2.3062	0.268	0	G04CA Alpha-adrenoreceptor antagonists	0.347
p6m	E	G04CB	3793	65	386614	6528	0.0143482	1.01445	0.788849	1.30457	0.911	0	G04CB Testosterone-5-alpha reductase inhibitors	0.938
p6m	E	H02AA	3847	11	392771	371	0.959069	2.60927	1.41303	4.81822	0.00218	-1	H02AA Mineralocorticoids	0.00507
p6m	E	H02AB	3670	188	386491	6651	1.00021	2.71886	2.32854	3.1746	1.14e-36	-1	H02AB Glucocorticoids	3.93e-35
p6m	E	H02BX	3853	5	392899	243	0.740628	2.09725	0.860857	5.10941	0.103	0	H02BX Corticosteroids for systemic use, combinations	0.158
p6m	E	H03AA	3607	251	367529	25613	-0.0262074	0.974133	0.853675	1.11159	0.697	0	H03AA Thyroid hormones	0.744
p6m	E	J01AA	3673	185	389325	3817	1.47355	4.36469	3.73209	5.1045	6.12e-76	-1	J01AA Tetracyclines [DG:DG01197]	6.33e-74
p6m	E	J01CA	3606	252	388974	4168	1.76266	5.8279	5.08605	6.67796	6.41e-142	-1	J01CA Penicillins with extended spectrum [DG:DG01780]	1.33e-139
p6m	E	J01CE	3842	16	392188	954	0.408053	1.50389	0.914517	2.47308	0.108	0	J01CE Beta-lactamase sensitive penicillins [DG:DG01778]	0.163
p6m	E	J01CF	3728	130	389139	4003	1.09775	2.99741	2.50171	3.59132	1.17e-32	-1	J01CF Beta-lactamase resistant penicillins [DG:DG01779]	2.42e-31
p6m	E	J01CR	3794	64	391685	1457	1.37698	3.96291	3.06448	5.12475	8.97e-26	-1	J01CR Combinations of penicillins, incl. beta-lactamase inhibitors	1.43e-24
p6m	E	J01DB	3836	22	392173	969	0.768265	2.15602	1.40557	3.30716	0.000432	-1	J01DB First-generation cephalosporins [DG:DG01774]	0.00115
p6m	E	J01EA	3810	48	391541	1601	0.998413	2.71397	2.021	3.64456	3.2e-11	-1	J01EA Trimethoprim and derivatives [DG:DG01581]	2.14e-10
p6m	E	J01EE	3848	10	392930	212	1.30236	3.67797	1.92741	7.0185	7.81e-05	-1	J01EE Combinations of sulfonamides and trimethoprim, incl. derivatives	0.000238
p6m	E	J01FA	3775	83	390713	2429	1.05854	2.88216	2.29426	3.62072	9.56e-20	-1	J01FA Macrolides [DG:DG01551]	1.1e-18
p6m	E	J01FF	3852	6	393018	124	1.31884	3.73907	1.61173	8.6743	0.00213	-1	J01FF Lincosamides [DG:DG01578]	0.00501
p6m	E	J01MA	3837	21	392374	768	0.885799	2.42492	1.56421	3.75925	7.5e-05	-1	J01MA Fluoroquinolones [DG:DG01549]	0.000235
p6m	E	J01XE	3699	159	387245	5897	1.04221	2.83548	2.40661	3.34079	1.32e-35	-1	J01XE Nitrofuran derivatives	3.9e-34
p6m	E	J02AC	3835	23	392511	631	1.19847	3.31505	2.17156	5.06069	2.81e-08	-1	J02AC Triazole derivatives	1.32e-07
p6m	E	J05AB	3825	33	391838	1304	0.910233	2.4849	1.75174	3.52491	3.35e-07	-1	J05AB Nucleosides and nucleotides excl. reverse transcriptase inhibitors [DG:DG02840]	1.39e-06
p6m	E	L01BC	3850	8	392598	544	0.646587	1.90901	0.947775	3.84515	0.0703	0	L01BC Pyrimidine analogues	0.114
p6m	E	L02AE	3845	13	392154	988	0.371042	1.44924	0.833399	2.52017	0.189	0	L02AE Gonadotropin releasing hormone analogues	0.257
p6m	E	L02BA	3852	6	392390	752	-0.186988	0.829454	0.370704	1.85591	0.649	0	L02BA Anti-estrogens	0.7
p6m	E	L02BG	3826	32	390266	2876	0.255788	1.29148	0.90755	1.83783	0.155	0	L02BG Aromatase inhibitors [DG:DG01596]	0.215
p6m	E	L04AA	3849	9	392699	443	0.531484	1.70146	0.87403	3.31219	0.118	0	L04AA Selective immunosuppressants	0.173
p6m	E	L04AX	3820	38	389875	3267	0.128713	1.13736	0.823263	1.5713	0.435	0	L04AX Other immunosuppressants	0.509
p6m	E	M01AB	3841	17	392361	781	0.671859	1.95787	1.20674	3.17656	0.00651	-1	M01AB Acetic acid derivatives and related substances	0.0136
p6m	E	M01AE	3731	127	384683	8459	0.336051	1.39941	1.16949	1.67454	0.000243	-1	M01AE Propionic acid derivatives	0.000671
p6m	E	M01AH	3846	12	392365	777	0.329839	1.39074	0.783887	2.46741	0.26	0	M01AH Coxibs	0.338
p6m	E	M02AA	3683	175	385354	7788	0.752349	2.12198	1.81262	2.48414	8.17e-21	-1	M02AA Antiinflammatory preparations, non-steroids for topical use	9.95e-20
p6m	E	M03BA	3853	5	393077	65	1.57049	4.80901	1.88693	12.2562	0.001	-1	M03BA Carbamic acid esters	0.00249
p6m	E	M03BX	3842	16	392444	698	0.516376	1.67594	1.01198	2.77554	0.0448	-1	M03BX Other centrally acting agents	0.076
p6m	E	M04AA	3736	122	385659	7483	0.272076	1.31269	1.08765	1.58429	0.00457	-1	M04AA Preparations inhibiting uric acid production	0.00985
p6m	E	M04AC	3836	22	392329	813	0.774801	2.17016	1.40898	3.34256	0.000439	-1	M04AC Preparations with no effect on uric acid metabolism	0.00115
p6m	E	M05BA	3753	105	383579	9563	0.300253	1.3502	1.10713	1.64664	0.00303	-1	M05BA Bisphosphonates [DG:DG01600]	0.00697
p6m	E	M05BX	3851	7	392808	334	0.983842	2.67471	1.25592	5.69629	0.0107	-1	M05BX Other drugs affecting bone structure and mineralization	0.0209
p6m	E	N01BB	3836	22	392419	723	0.90407	2.46963	1.60238	3.80627	4.2e-05	-1	N01BB Amides	0.00014
p6m	E	N01BX	3851	7	392804	338	0.494797	1.64017	0.771247	3.48804	0.199	0	N01BX Other local anesthetics	0.269
p6m	E	N02AA	3743	115	389760	3382	0.90877	2.48127	2.03465	3.02593	2.83e-19	-1	N02AA Natural opium alkaloids	3.08e-18
p6m	E	N02AB	3845	13	392695	447	0.610725	1.84177	1.04872	3.23451	0.0335	-1	N02AB Phenylpiperidine derivatives	0.0598
p6m	E	N02AE	3817	41	391776	1366	0.75246	2.12221	1.53887	2.9267	4.47e-06	-1	N02AE Oripavine derivatives	1.6e-05
p6m	E	N02AJ	3636	222	381011	12131	0.465948	1.59352	1.3844	1.83424	8.51e-11	-1	N02AJ Opioids in combination with non-opioid analgesics	4.89e-10
p6m	E	N02AX	3788	70	388889	4253	0.156309	1.16919	0.915954	1.49243	0.209	0	N02AX Other opioids	0.281
p6m	E	N02BE	3250	608	364531	28611	0.736238	2.08806	1.89712	2.29823	3.76e-51	-1	N02BE Anilides	2.59e-49
p6m	E	N02BG	3851	7	392868	274	0.609061	1.8387	0.862378	3.92037	0.115	0	N02BG Other analgesics and antipyretics	0.17
p6m	E	N02CC	3820	38	390569	2573	0.347493	1.41551	1.02296	1.95871	0.036	-1	N02CC Selective serotonin (5HT1) agonists [DG:DG01943]	0.063
p6m	E	N02CX	3850	8	392529	613	-0.00249042	0.997513	0.49228	2.02127	0.995	0	N02CX Other antimigraine preparations	0.998
p6m	E	N03AB	3848	10	392753	389	0.793756	2.21169	1.16653	4.19326	0.015	-1	N03AB Hydantoin derivatives	0.0285
p6m	E	N03AE	3845	13	392626	516	0.589025	1.80223	1.02482	3.16936	0.0408	-1	N03AE Benzodiazepine derivatives	0.0698
p6m	E	N03AF	3841	17	391953	1189	0.170068	1.18539	0.730878	1.92254	0.491	0	N03AF Carboxamide derivatives	0.562
p6m	E	N03AG	3837	21	392133	1009	0.268399	1.30787	0.836705	2.04436	0.239	0	N03AG Fatty acid derivatives	0.317
p6m	E	N03AX	3643	215	381073	12069	0.317943	1.3743	1.18813	1.58963	1.86e-05	-1	N03AX Other antiepileptics	6.42e-05
p6m	E	N04BA	3820	38	391095	2047	0.68379	1.98137	1.42779	2.74958	4.31e-05	-1	N04BA Dopa and dopa derivatives	0.000142
p6m	E	N04BB	3853	5	392965	177	1.04371	2.83972	1.15936	6.95559	0.0224	-1	N04BB Adamantane derivatives	0.0407
p6m	E	N04BC	3833	25	391805	1337	0.581464	1.78865	1.19676	2.67329	0.00457	-1	N04BC Dopamine agonists	0.00985
p6m	E	N04BD	3852	6	392691	451	0.430341	1.53778	0.68394	3.45757	0.298	0	N04BD Monoamine oxidase B inhibitors	0.374
p6m	E	N05AB	3825	33	391541	1601	0.684021	1.98183	1.39657	2.81236	0.000128	-1	N05AB Phenothiazines with piperazine structure	0.000379
p6m	E	N05AD	3849	9	393036	106	1.97558	7.21082	3.58606	14.4994	2.97e-08	-1	N05AD Butyrophenone derivatives [DG:DG01940]	1.37e-07
p6m	E	N05AH	3831	27	391863	1279	0.332306	1.39418	0.943192	2.06081	0.0956	0	N05AH Diazepines, oxazepines and thiazepines	0.15
p6m	E	N05AN	3853	5	392655	487	-0.18138	0.834119	0.343678	2.02444	0.689	0	N05AN Lithium	0.739
p6m	E	N05AX	3826	32	392498	644	0.999439	2.71676	1.86676	3.95378	1.79e-07	-1	N05AX Other antipsychotics	7.72e-07
p6m	E	N05BA	3766	92	390891	2251	1.21467	3.3692	2.70942	4.18964	8.96e-28	-1	N05BA Benzodiazepine derivatives [DG:DG01914]	1.55e-26
p6m	E	N05BB	3853	5	392831	311	0.249376	1.28322	0.524907	3.13706	0.585	0	N05BB Diphenylmethane derivatives	0.634
p6m	E	N05CD	3808	50	392415	727	1.84478	6.32673	4.68815	8.53802	1.69e-33	-1	N05CD Benzodiazepine derivatives	3.89e-32
p6m	E	N05CF	3790	68	390209	2933	0.708168	2.03027	1.58491	2.60078	2.09e-08	-1	N05CF Benzodiazepine related drugs	1.01e-07
p6m	E	N05CH	3852	6	392822	320	0.3099	1.36329	0.598808	3.10376	0.46	0	N05CH Melatonin receptor agonists	0.529
p6m	E	N06AA	3673	185	379961	13181	0.217732	1.24325	1.0668	1.4489	0.0053	-1	N06AA Non-selective monoamine reuptake inhibitors [DG:DG01730]	0.0112
p6m	E	N06AB	3539	319	372620	20522	0.259778	1.29664	1.14467	1.46879	4.42e-05	-1	N06AB Selective serotonin reuptake inhibitors	0.000143
p6m	E	N06AX	3688	170	385054	8088	0.44358	1.55828	1.32065	1.83866	1.49e-07	-1	N06AX Other antidepressants	6.56e-07
p6m	E	N06DA	3795	63	391429	1713	1.06964	2.91432	2.18662	3.8842	2.93e-13	-1	N06DA Anticholinesterases	2.43e-12
p6m	E	N06DX	3794	64	392296	846	1.82145	6.18079	4.61705	8.27417	1.95e-34	-1	N06DX Other anti-dementia drugs	5.05e-33
p6m	E	N07BC	3853	5	393094	48	1.84597	6.33423	2.42048	16.5763	0.000169	-1	N07BC Drugs used in opioid dependence	0.000486
p6m	E	N07CA	3820	38	391129	2013	0.519225	1.68072	1.21227	2.3302	0.00184	-1	N07CA Antivertigo preparations	0.00438
p6m	E	P01AB	3836	22	392681	461	1.46043	4.30781	2.78228	6.66978	5.85e-11	-1	P01AB Nitroimidazole derivatives	3.56e-10
p6m	E	P01BA	3840	18	391813	1329	0.213473	1.23797	0.774703	1.97827	0.372	0	P01BA Aminoquinolines	0.456
p6m	E	P01BC	3815	43	390215	2927	0.171786	1.18742	0.87159	1.6177	0.276	0	P01BC Methanolquinolines	0.352
p6m	E	R01AC	3851	7	392813	329	0.720936	2.05636	0.969797	4.3603	0.0601	0	R01AC Antiallergic agents, excl. corticosteroids	0.0987
p6m	E	R01AD	3696	162	381243	11899	0.279515	1.32249	1.12583	1.55349	0.000667	-1	R01AD Corticosteroids	0.0017
p6m	E	R01AX	3853	5	392981	161	1.10115	3.00762	1.22413	7.38955	0.0163	-1	R01AX Other nasal preparations	0.0304
p6m	E	R03AC	3524	334	377701	15441	0.684198	1.98218	1.7375	2.26132	2.49e-24	-1	R03AC Selective beta-2-adrenoreceptor agonists	3.68e-23
p6m	E	R03AK	3649	209	379736	13406	0.294788	1.34284	1.14765	1.57123	0.000235	-1	R03AK Adrenergics in combination with corticosteroids or other drugs, excl. anticholinergics	0.000657
p6m	E	R03AL	3822	36	390974	2168	0.254818	1.29023	0.913637	1.82204	0.148	0	R03AL Adrenergics in combination with anticholinergics incl. triple combinations with corticosteroids	0.207
p6m	E	R03BA	3745	113	386444	6698	0.491833	1.63531	1.34285	1.99147	9.97e-07	-1	R03BA Glucocorticoids	3.82e-06
p6m	E	R03BB	3794	64	388919	4223	0.144276	1.1552	0.886077	1.50607	0.286	0	R03BB Anticholinergics	0.361
p6m	E	R03DA	3848	10	392713	429	0.319258	1.37611	0.723438	2.6176	0.331	0	R03DA Xanthines	0.408
p6m	E	R03DC	3827	31	390577	2565	-0.147943	0.86248	0.599164	1.24152	0.426	0	R03DC Leukotriene receptor antagonists	0.501
p6m	E	R05CB	3808	50	390617	2525	0.398641	1.4898	1.10735	2.00434	0.00845	-1	R05CB Mucolytics	0.0167
p6m	E	R05DA	3756	102	388233	4909	0.61683	1.85305	1.51462	2.26709	2.04e-09	-1	R05DA Opium alkaloids and derivatives	1.06e-08
p6m	E	R06AB	3845	13	392582	560	0.66695	1.94829	1.11831	3.39425	0.0185	-1	R06AB Substituted alkylamines	0.0339
p6m	E	R06AD	3844	14	392619	523	0.68536	1.98449	1.15994	3.39516	0.0124	-1	R06AD Phenothiazine derivatives	0.024
p6m	E	R06AE	3723	135	387786	5356	0.786922	2.19662	1.83652	2.62733	7.07e-18	-1	R06AE Piperazine derivatives	7.32e-17
p6m	E	R06AX	3762	96	386236	6906	0.198756	1.21988	0.991574	1.50076	0.0601	0	R06AX Other antihistamines for systemic use	0.0987
p6m	E	S01AA	3818	40	391960	1182	1.1598	3.1893	2.31195	4.3996	1.6e-12	-1	S01AA Antibiotics	1.27e-11
p6m	E	S01BA	3851	7	392456	686	-0.000992771	0.999008	0.473179	2.10917	0.998	0	S01BA Corticosteroids, plain	0.998
p6m	E	S01EC	3838	20	390622	2520	-0.149274	0.861333	0.552815	1.34203	0.509	0	S01EC Carbonic anhydrase inhibitors	0.576
p6m	E	S01ED	3830	28	389496	3646	-0.105262	0.900089	0.618774	1.3093	0.582	0	S01ED Beta blocking agents	0.634
p6m	E	S01EE	3803	55	387111	6031	-0.00446793	0.995542	0.760448	1.30332	0.974	0	S01EE Prostaglandin analogues	0.988
p6m	E	S01GX	3837	21	391767	1375	0.266468	1.30535	0.843772	2.01942	0.231	0	S01GX Other antiallergics	0.308
p6m	E	S01XA	3712	146	380151	12991	0.150716	1.16267	0.980969	1.37802	0.0822	0	S01XA Other ophthalmologicals	0.13
p6m	E	S02AA	3852	6	392761	381	0.45062	1.56928	0.698138	3.52746	0.276	0	S02AA Antiinfectives	0.352
p6m	E	S02CA	3852	6	392860	282	0.660104	1.93499	0.856602	4.37099	0.112	0	S02CA Corticosteroids and antiinfectives in combination	0.167
p6m	E	V03AE	3849	9	393041	101	1.4626	4.31719	2.0908	8.91435	7.7e-05	-1	V03AE Drugs for treatment of hyperkalemia and hyperphosphatemia	0.000238
p6m	E	V06DC	3848	10	393001	141	1.39003	4.01496	2.05079	7.86033	5.01e-05	-1	V06DC Carbohydrates	0.00016
p6m	E	V07AY	3754	104	389076	4066	0.534117	1.70594	1.38069	2.10782	7.47e-07	-1	V07AY Other non-therapeutic auxiliary products	2.92e-06
p6m	F	A01AB	3791	67	26575	402	0.244817	1.27739	0.978929	1.66684	0.0714	0	A01AB Antiinfectives and antiseptics for local oral treatment	0.274
p6m	F	A01AD	3838	20	26861	116	0.266063	1.30482	0.801427	2.12439	0.285	0	A01AD Other agents for local oral treatment	0.602
p6m	F	A02BA	3807	51	26386	591	-0.397454	0.672029	0.501146	0.901181	0.00793	1	A02BA H2-receptor antagonists [DG:DG01481]	0.0721
p6m	F	A02BC	2870	988	17691	9286	-0.2982	0.742153	0.684009	0.805239	8e-13	1	A02BC Proton pump inhibitors [DG:DG01646]	1.66e-10
p6m	F	A02BX	3755	103	26190	787	0.0641193	1.06622	0.86134	1.31983	0.556	0	A02BX Other drugs for peptic ulcer and gastro-oesophageal reflux disease (GORD)	0.846
p6m	F	A03AA	3828	30	26650	327	-0.363284	0.695389	0.474947	1.01815	0.0618	0	A03AA Synthetic anticholinergics, esters with tertiary amino group	0.255
p6m	F	A03AX	3844	14	26828	149	-0.316926	0.728384	0.417439	1.27095	0.265	0	A03AX Other drugs for functional gastrointestinal disorders	0.602
p6m	F	A03BB	3805	53	26607	370	0.0750242	1.07791	0.800966	1.45061	0.621	0	A03BB Belladonna alkaloids, semisynthetic, quaternary ammonium compounds	0.862
p6m	F	A03FA	3830	28	26694	283	-0.310606	0.733003	0.492939	1.08998	0.125	0	A03FA Propulsives [DG:DG01763]	0.404
p6m	F	A04AA	3852	6	26892	85	-0.589387	0.554667	0.240484	1.27932	0.167	0	A04AA Serotonin (5HT3) antagonists	0.467
p6m	F	A05AA	3851	7	26921	56	-0.0259142	0.974419	0.438603	2.16481	0.949	0	A05AA Bile acid and derivatives [DG:DG01956]	0.977
p6m	F	A06AA	3769	89	26392	585	0.223647	1.25063	0.991526	1.57744	0.059	0	A06AA Softeners, emollients	0.254
p6m	F	A06AB	3711	147	26155	822	0.360395	1.4339	1.18994	1.72787	0.000152	-1	A06AB Contact laxatives	0.00393
p6m	F	A06AC	3847	11	26797	180	-0.57077	0.56509	0.305685	1.04463	0.0687	0	A06AC Bulk-forming laxatives	0.268
p6m	F	A06AD	3605	253	24878	2099	0.0158163	1.01594	0.883117	1.16874	0.825	0	A06AD Osmotically acting laxatives	0.933
p6m	F	A06AG	3846	12	26929	48	0.621726	1.86214	0.971656	3.56871	0.061	0	A06AG Enemas	0.255
p6m	F	A06AX	3845	13	26843	134	-0.221621	0.801219	0.449316	1.42873	0.453	0	A06AX Other drugs for constipation	0.793
p6m	F	A07AA	3828	30	26766	211	0.118202	1.12547	0.76019	1.66627	0.555	0	A07AA Antibiotics	0.846
p6m	F	A07DA	3805	53	26513	464	-0.0561238	0.945422	0.705798	1.2664	0.707	0	A07DA Antipropulsives	0.907
p6m	F	A07EC	3826	32	26657	320	-0.284833	0.75214	0.519831	1.08827	0.131	0	A07EC Aminosalicylic acid and similar agents	0.417
p6m	F	A08AB	3850	8	26946	31	0.21602	1.24113	0.559904	2.75118	0.595	0	A08AB Peripherally acting antiobesity products	0.862
p6m	F	A09AB	3853	5	26966	11	1.37758	3.96529	1.36545	11.5153	0.0113	-1	A09AB Acid preparations	0.0866
p6m	F	A10AB	3731	127	26049	928	-0.0694441	0.932912	0.751496	1.15812	0.529	0	A10AB Insulins and analogues for injection, fast-acting	0.834
p6m	F	A10AC	3839	19	26843	134	0.0240545	1.02435	0.621656	1.68789	0.925	0	A10AC Insulins and analogues for injection, intermediate-acting	0.973
p6m	F	A10AD	3821	37	26767	210	0.263931	1.30204	0.897892	1.88809	0.164	0	A10AD Insulins and analogues for injection, intermediate- or long-acting combined with fast-acting	0.467
p6m	F	A10AE	3827	31	26650	327	-0.505426	0.603248	0.40966	0.888319	0.0105	1	A10AE Insulins and analogues for injection, long-acting	0.0866
p6m	F	A10BA	3587	271	25112	1865	0.00486056	1.00487	0.855922	1.17974	0.953	0	A10BA Biguanides [DG:DG01684]	0.977
p6m	F	A10BB	3774	84	26379	598	-0.0255557	0.974768	0.756988	1.2552	0.843	0	A10BB Sulfonylureas	0.933
p6m	F	A10BD	3852	6	26949	28	0.230197	1.25885	0.508679	3.11532	0.619	0	A10BD Combinations of oral blood glucose lowering drugs	0.862
p6m	F	A10BG	3850	8	26924	53	0.173817	1.18984	0.556862	2.54231	0.654	0	A10BG Thiazolidinediones [DG:DG01683]	0.865
p6m	F	A10BH	3781	77	26443	534	0.045295	1.04634	0.806232	1.35795	0.733	0	A10BH Dipeptidyl peptidase 4 (DPP-4) inhibitors [DG:DG01601]	0.907
p6m	F	A10BJ	3832	26	26813	164	-0.138846	0.870362	0.563845	1.34351	0.531	0	A10BJ Glucagon-like peptide-1 receptor (GLP-1) analogues	0.834
p6m	F	A10BK	3805	53	26729	248	0.179056	1.19609	0.87064	1.64319	0.269	0	A10BK Sodium-glucose co-transporter 2 (SGLT2) inhibitors	0.602
p6m	F	A11CC	3774	84	26290	687	-0.0763484	0.926493	0.731316	1.17376	0.527	0	A11CC Vitamin D and analogues	0.834
p6m	F	A11DA	3823	35	26709	268	-0.0558426	0.945688	0.656377	1.36252	0.764	0	A11DA Vitamin B1, plain	0.914
p6m	F	A11EX	3850	8	26845	132	-0.826343	0.437647	0.212502	0.901331	0.025	1	A11EX Vitamin B-complex, other combinations	0.156
p6m	F	A12AA	3848	10	26903	74	0.00460653	1.00462	0.512637	1.96875	0.989	0	A12AA Calcium	0.994
p6m	F	A12AX	3565	293	24103	2874	-0.111568	0.89443	0.785015	1.0191	0.0938	0	A12AX Calcium, combinations with vitamin D and/or other drugs	0.333
p6m	F	B01AA	3800	58	26338	639	-0.278223	0.757128	0.573805	0.99902	0.0492	1	B01AA Vitamin K antagonists	0.229
p6m	F	B01AB	3846	12	26858	119	-0.292241	0.746589	0.408695	1.36384	0.342	0	B01AB Heparin group	0.708
p6m	F	B01AC	3421	437	23000	3977	-0.135615	0.873179	0.775478	0.983189	0.0251	1	B01AC Platelet aggregation inhibitors excl. heparin	0.156
p6m	F	B01AE	3850	8	26879	98	-0.333102	0.716697	0.34549	1.48674	0.371	0	B01AE Direct thrombin inhibitors	0.73
p6m	F	B01AF	3647	211	24925	2052	-0.0904793	0.913493	0.785499	1.06234	0.24	0	B01AF Direct factor Xa inhibitors	0.601
p6m	F	B03AA	3747	111	26001	976	-0.113769	0.892464	0.726133	1.0969	0.28	0	B03AA Iron bivalent, oral preparations	0.602
p6m	F	B03BA	3767	91	26279	698	0.042449	1.04336	0.831925	1.30854	0.713	0	B03BA Vitamin B12 (cyanocobalamin and analogues)	0.907
p6m	F	B03BB	3732	126	26049	928	0.107544	1.11354	0.915815	1.35395	0.281	0	B03BB Folic acid and derivatives	0.602
p6m	F	B05CB	3844	14	26903	74	0.408244	1.50417	0.838587	2.69804	0.171	0	B05CB Salt solutions	0.472
p6m	F	B05XA	3851	7	26888	89	-0.52862	0.589418	0.268836	1.29229	0.187	0	B05XA Electrolyte solutions	0.503
p6m	F	C01AA	3824	34	26619	358	-0.117842	0.888836	0.620366	1.27349	0.521	0	C01AA Digitalis glycosides [DG:DG01697]	0.834
p6m	F	C01BD	3849	9	26871	106	-0.394532	0.673996	0.336518	1.34991	0.266	0	C01BD Antiarrhythmics, class III [DG:DG01648]	0.602
p6m	F	C01CA	3848	10	26906	71	0.0641865	1.06629	0.543128	2.09339	0.852	0	C01CA Adrenergic and dopaminergic agents	0.933
p6m	F	C01DA	3733	125	25901	1076	-0.0325262	0.967997	0.78904	1.18754	0.755	0	C01DA Organic nitrates	0.909
p6m	F	C01DX	3841	17	26777	200	-0.320014	0.726139	0.436478	1.20803	0.218	0	C01DX Other vasodilators used in cardiac diseases	0.571
p6m	F	C01EB	3835	23	26806	171	0.114064	1.12082	0.714981	1.75703	0.619	0	C01EB Other cardiac preparations	0.862
p6m	F	C02AC	3852	6	26919	58	-0.206219	0.813655	0.346159	1.91252	0.636	0	C02AC Imidazoline receptor agonists	0.862
p6m	F	C02CA	3783	75	26195	782	-0.264559	0.767544	0.599985	0.981898	0.0353	1	C02CA Alpha-adrenoreceptor antagonists	0.183
p6m	F	C03AA	3748	110	26021	956	0.0105968	1.01065	0.821122	1.24393	0.92	0	C03AA Thiazides, plain [DG:DG01749]	0.973
p6m	F	C03BA	3784	74	26335	642	-0.0971615	0.907409	0.707668	1.16353	0.444	0	C03BA Sulfonamides, plain	0.786
p6m	F	C03CA	3679	179	25325	1652	-0.0691844	0.933155	0.788609	1.10419	0.42	0	C03CA Sulfonamides, plain	0.776
p6m	F	C03DA	3810	48	26452	525	-0.336552	0.714229	0.526748	0.968439	0.0303	1	C03DA Aldosterone antagonists	0.165
p6m	F	C03EB	3850	8	26944	33	0.787225	2.19729	0.999597	4.83003	0.0501	0	C03EB High-ceiling diuretics and potassium-sparing agents	0.229
p6m	F	C05AX	3829	29	26678	299	-0.362275	0.696091	0.472548	1.02538	0.0668	0	C05AX Other agents for treatment of hemorrhoids and anal fissures for topical use	0.266
p6m	F	C07AA	3826	32	26651	326	-0.378004	0.685228	0.473531	0.991565	0.045	1	C07AA Beta blocking agents, non-selective	0.222
p6m	F	C07AB	3460	398	22972	4005	-0.262513	0.769116	0.682013	0.867344	1.87e-05	1	C07AB Beta blocking agents, selective	0.000774
p6m	F	C07AG	3845	13	26881	96	0.0576197	1.05931	0.586484	1.91334	0.849	0	C07AG Alpha and beta blocking agents	0.933
p6m	F	C08CA	3320	538	22493	4484	-0.077817	0.925134	0.833899	1.02635	0.142	0	C08CA Dihydropyridine derivatives [DG:DG01928]	0.432
p6m	F	C08DA	3849	9	26897	80	-0.102976	0.902149	0.448489	1.8147	0.773	0	C08DA Phenylalkylamine derivatives	0.918
p6m	F	C08DB	3833	25	26600	377	-0.551108	0.576311	0.381503	0.870595	0.00884	1	C08DB Benzothiazepine derivatives	0.0762
p6m	F	C09AA	3355	503	22656	4321	-0.155873	0.855668	0.769001	0.952102	0.00423	1	C09AA ACE inhibitors, plain [DG:DG01501]	0.0524
p6m	F	C09CA	3571	287	24281	2696	-0.184209	0.831762	0.72758	0.950862	0.00698	1	C09CA Angiotensin II receptor blockers, plain [DG:DG01495]	0.0688
p6m	F	C09DX	3850	8	26919	58	0.0357929	1.03644	0.487245	2.20466	0.926	0	C09DX Angiotensin II receptor blockers (ARBs), other combinations	0.973
p6m	F	C10AA	2751	1107	17425	9552	-0.108596	0.897093	0.824785	0.97574	0.0113	1	C10AA HMG CoA reductase inhibitors [DG:DG01660]	0.0866
p6m	F	C10AB	3844	14	26820	157	-0.317331	0.72809	0.417508	1.26971	0.263	0	C10AB Fibrates	0.602
p6m	F	C10AC	3849	9	26902	75	-0.125505	0.882051	0.436021	1.78435	0.727	0	C10AC Bile acid sequestrants	0.907
p6m	F	C10AX	3819	39	26596	381	-0.133572	0.874964	0.624473	1.22593	0.438	0	C10AX Other lipid modifying agents	0.782
p6m	F	D01AC	3743	115	26266	711	0.199197	1.22042	0.993787	1.49874	0.0574	0	D01AC Imidazole and triazole derivatives	0.253
p6m	F	D01AE	3846	12	26857	120	-0.331942	0.717529	0.392306	1.31236	0.281	0	D01AE Other antifungals for topical use	0.602
p6m	F	D01BA	3849	9	26917	60	0.0137942	1.01389	0.495882	2.07302	0.97	0	D01BA Antifungals for systemic use	0.979
p6m	F	D02AC	3813	45	26488	489	-0.264049	0.767936	0.562082	1.04918	0.0972	0	D02AC Soft paraffin and fat products	0.335
p6m	F	D02AE	3840	18	26834	143	-0.00081742	0.999183	0.606408	1.64636	0.997	0	D02AE Carbamide products	0.997
p6m	F	D02AX	3631	227	25362	1615	0.120538	1.1281	0.972537	1.30855	0.111	0	D02AX Other emollients and protectives	0.365
p6m	F	D05AX	3836	22	26800	177	-0.0814523	0.921777	0.587443	1.44639	0.723	0	D05AX Other antipsoriatics for topical use	0.907
p6m	F	D06AX	3836	22	26771	206	-0.25827	0.772387	0.492939	1.21025	0.26	0	D06AX Other antibiotics for topical use	0.602
p6m	F	D06BA	3853	5	26967	10	1.54569	4.69121	1.54209	14.2712	0.00647	-1	D06BA Sulfonamides	0.0688
p6m	F	D06BX	3852	6	26899	78	-0.594696	0.55173	0.238294	1.27744	0.165	0	D06BX Other chemotherapeutics	0.467
p6m	F	D07AA	3830	28	26751	226	-0.0358582	0.964777	0.646569	1.43959	0.861	0	D07AA Corticosteroids, weak (group I)	0.938
p6m	F	D07AB	3832	26	26760	217	-0.0588361	0.942861	0.622139	1.42892	0.781	0	D07AB Corticosteroids, moderately potent (group II)	0.919
p6m	F	D07AC	3776	82	26289	688	-0.0390848	0.961669	0.759925	1.21697	0.745	0	D07AC Corticosteroids, potent (group III)	0.907
p6m	F	D07AD	3833	25	26782	195	0.10796	1.114	0.729085	1.70214	0.618	0	D07AD Corticosteroids, very potent (group IV)	0.862
p6m	F	D07CA	3844	14	26890	87	0.26797	1.30731	0.73549	2.32369	0.361	0	D07CA Corticosteroids, weak, combinations with antibiotics	0.73
p6m	F	D07CC	3822	36	26779	198	0.319704	1.37672	0.955907	1.98278	0.0858	0	D07CC Corticosteroids, potent, combinations with antibiotics	0.317
p6m	F	D07CD	3848	10	26917	60	0.177662	1.19442	0.604855	2.35865	0.609	0	D07CD Corticosteroids, very potent, combinations with antibiotics	0.862
p6m	F	D09AA	3845	13	26921	56	0.615535	1.85065	0.997708	3.43276	0.0509	0	D09AA Medicated dressings with antiinfectives	0.229
p6m	F	D11AC	3843	15	26883	94	0.0967496	1.10158	0.631011	1.92309	0.734	0	D11AC Medicated shampoos	0.907
p6m	F	G01AF	3836	22	26804	173	-0.0726153	0.929959	0.591109	1.46305	0.753	0	G01AF Imidazole derivatives	0.909
p6m	F	G03AC	3852	6	26948	29	-0.207424	0.812675	0.335244	1.97003	0.646	0	G03AC Progestogens	0.863
p6m	F	G03BA	3841	17	26895	82	0.189956	1.2092	0.704157	2.07646	0.491	0	G03BA 3-oxoandrosten (4) derivatives	0.812
p6m	F	G03CA	3747	111	25869	1108	-0.416303	0.65948	0.53759	0.809008	6.54e-05	1	G03CA Natural and semisynthetic estrogens, plain	0.00226
p6m	F	G03DA	3848	10	26927	50	-0.181646	0.833896	0.419924	1.65597	0.604	0	G03DA Pregnen (4) derivatives	0.862
p6m	F	G03FA	3849	9	26928	49	-0.0944166	0.909904	0.443288	1.86769	0.797	0	G03FA Progestogens and estrogens, fixed combinations	0.932
p6m	F	G03FB	3842	16	26920	57	0.201484	1.22322	0.69645	2.14841	0.483	0	G03FB Progestogens and estrogens, sequential preparations	0.812
p6m	F	G04BD	3762	96	26051	926	-0.159811	0.852304	0.685267	1.06006	0.151	0	G04BD Urinary antispasmodics	0.453
p6m	F	G04BE	3748	110	26265	712	0.0359352	1.03659	0.839483	1.27997	0.738	0	G04BE Drugs used in erectile dysfunction	0.907
p6m	F	G04CA	3844	14	26859	118	-0.0677072	0.934534	0.531676	1.64264	0.814	0	G04CA Alpha-adrenoreceptor antagonists	0.933
p6m	F	G04CB	3793	65	26132	845	-0.373148	0.688563	0.530611	0.893534	0.00501	1	G04CB Testosterone-5-alpha reductase inhibitors	0.0576
p6m	F	H02AA	3847	11	26900	77	0.18361	1.20155	0.624747	2.31088	0.582	0	H02AA Mineralocorticoids	0.862
p6m	F	H02AB	3670	188	25408	1569	-0.0182763	0.98189	0.835054	1.15454	0.825	0	H02AB Glucocorticoids	0.933
p6m	F	H02BX	3853	5	26922	55	-0.262615	0.769038	0.30499	1.93915	0.578	0	H02BX Corticosteroids for systemic use, combinations	0.862
p6m	F	H03AA	3607	251	24575	2402	-0.242497	0.784666	0.682666	0.901907	0.000643	1	H03AA Thyroid hormones	0.0121
p6m	F	J01AA	3673	185	25851	1126	0.26075	1.2979	1.10036	1.53091	0.00197	-1	J01AA Tetracyclines [DG:DG01197]	0.0314
p6m	F	J01CA	3606	252	25554	1423	0.343377	1.4097	1.22175	1.62656	2.57e-06	-1	J01CA Penicillins with extended spectrum [DG:DG01780]	0.000133
p6m	F	J01CE	3842	16	26802	175	-0.448075	0.638857	0.379855	1.07446	0.0912	0	J01CE Beta-lactamase sensitive penicillins [DG:DG01778]	0.331
p6m	F	J01CF	3728	130	26064	913	0.0681815	1.07056	0.883916	1.29661	0.485	0	J01CF Beta-lactamase resistant penicillins [DG:DG01779]	0.812
p6m	F	J01CR	3794	64	26483	494	-0.00860226	0.991435	0.758741	1.29549	0.95	0	J01CR Combinations of penicillins, incl. beta-lactamase inhibitors	0.977
p6m	F	J01DB	3836	22	26702	275	-0.366563	0.693113	0.445887	1.07742	0.103	0	J01DB First-generation cephalosporins [DG:DG01774]	0.344
p6m	F	J01EA	3810	48	26534	443	-0.142808	0.866921	0.638805	1.1765	0.359	0	J01EA Trimethoprim and derivatives [DG:DG01581]	0.73
p6m	F	J01EE	3848	10	26905	72	0.0412864	1.04215	0.532094	2.04114	0.904	0	J01EE Combinations of sulfonamides and trimethoprim, incl. derivatives	0.97
p6m	F	J01FA	3775	83	26328	649	-0.00812746	0.991905	0.782564	1.25725	0.946	0	J01FA Macrolides [DG:DG01551]	0.977
p6m	F	J01FF	3852	6	26944	33	0.37688	1.45773	0.598304	3.55166	0.407	0	J01FF Lincosamides [DG:DG01578]	0.768
p6m	F	J01MA	3837	21	26716	261	-0.492322	0.611206	0.389595	0.958874	0.0321	1	J01MA Fluoroquinolones [DG:DG01549]	0.17
p6m	F	J01XE	3699	159	25539	1438	-0.109339	0.896427	0.755624	1.06347	0.21	0	J01XE Nitrofuran derivatives	0.557
p6m	F	J02AC	3835	23	26811	166	0.0429105	1.04384	0.669111	1.62845	0.85	0	J02AC Triazole derivatives	0.933
p6m	F	J05AB	3825	33	26763	214	0.123633	1.1316	0.777621	1.64672	0.518	0	J05AB Nucleosides and nucleotides excl. reverse transcriptase inhibitors [DG:DG02840]	0.834
p6m	F	L01BC	3850	8	26887	90	-0.179345	0.835818	0.403425	1.73165	0.629	0	L01BC Pyrimidine analogues	0.862
p6m	F	L02AE	3845	13	26718	259	-0.820011	0.440427	0.250848	0.773281	0.0043	1	L02AE Gonadotropin releasing hormone analogues	0.0524
p6m	F	L02BA	3852	6	26880	97	-0.931315	0.394035	0.171114	0.907368	0.0286	1	L02BA Anti-estrogens	0.165
p6m	F	L02BG	3826	32	26643	334	-0.203151	0.816155	0.563683	1.18171	0.282	0	L02BG Aromatase inhibitors [DG:DG01596]	0.602
p6m	F	L04AA	3849	9	26914	63	0.0157439	1.01587	0.499476	2.06614	0.965	0	L04AA Selective immunosuppressants	0.979
p6m	F	L04AX	3820	38	26649	328	-0.0686505	0.933653	0.662265	1.31625	0.695	0	L04AX Other immunosuppressants	0.899
p6m	F	M01AB	3841	17	26856	121	-0.0870874	0.916597	0.545821	1.53924	0.742	0	M01AB Acetic acid derivatives and related substances	0.907
p6m	F	M01AE	3731	127	25776	1201	-0.370104	0.690662	0.57186	0.834146	0.000122	1	M01AE Propionic acid derivatives	0.00361
p6m	F	M01AH	3846	12	26861	116	-0.331441	0.717888	0.392606	1.31267	0.282	0	M01AH Coxibs	0.602
p6m	F	M02AA	3683	175	25691	1286	0.13948	1.14968	0.972928	1.35853	0.102	0	M02AA Antiinflammatory preparations, non-steroids for topical use	0.344
p6m	F	M03BA	3853	5	26970	7	1.42936	4.17605	1.26062	13.8339	0.0193	-1	M03BA Carbamic acid esters	0.129
p6m	F	M03BX	3842	16	26832	145	-0.295617	0.744072	0.439266	1.26038	0.272	0	M03BX Other centrally acting agents	0.602
p6m	F	M04AA	3736	122	26098	879	0.0707599	1.07332	0.878577	1.31124	0.488	0	M04AA Preparations inhibiting uric acid production	0.812
p6m	F	M04AC	3836	22	26830	147	0.0997453	1.10489	0.698275	1.74828	0.67	0	M04AC Preparations with no effect on uric acid metabolism	0.872
p6m	F	M05BA	3753	105	25918	1059	-0.0553415	0.946162	0.768364	1.1651	0.602	0	M05BA Bisphosphonates [DG:DG01600]	0.862
p6m	F	M05BX	3851	7	26925	52	0.333183	1.3954	0.625466	3.11312	0.416	0	M05BX Other drugs affecting bone structure and mineralization	0.776
p6m	F	N01BB	3836	22	26773	204	-0.20336	0.815984	0.521209	1.27747	0.374	0	N01BB Amides	0.73
p6m	F	N01BX	3851	7	26900	77	-0.314849	0.729899	0.332595	1.60181	0.432	0	N01BX Other local anesthetics	0.778
p6m	F	N02AA	3743	115	26022	955	-0.0825317	0.920782	0.751733	1.12785	0.425	0	N02AA Natural opium alkaloids	0.777
p6m	F	N02AB	3845	13	26857	120	-0.16443	0.848377	0.472723	1.52255	0.582	0	N02AB Phenylpiperidine derivatives	0.862
p6m	F	N02AE	3817	41	26688	289	0.146727	1.15804	0.825662	1.62422	0.395	0	N02AE Oripavine derivatives	0.757
p6m	F	N02AJ	3636	222	25072	1905	-0.125357	0.882182	0.76149	1.022	0.0949	0	N02AJ Opioids in combination with non-opioid analgesics	0.333
p6m	F	N02AX	3788	70	26227	750	-0.417788	0.658502	0.511276	0.848123	0.00121	1	N02AX Other opioids	0.0209
p6m	F	N02BE	3250	608	22021	4956	-0.0143838	0.985719	0.892893	1.0882	0.776	0	N02BE Anilides	0.918
p6m	F	N02BG	3851	7	26916	61	-0.066367	0.935787	0.423573	2.06741	0.87	0	N02BG Other analgesics and antipyretics	0.943
p6m	F	N02CC	3820	38	26712	265	-0.121963	0.885181	0.625169	1.25333	0.492	0	N02CC Selective serotonin (5HT1) agonists [DG:DG01943]	0.812
p6m	F	N02CX	3850	8	26908	69	-0.364304	0.69468	0.328045	1.47108	0.341	0	N02CX Other antimigraine preparations	0.708
p6m	F	N03AB	3848	10	26933	44	0.42334	1.52705	0.749286	3.11215	0.244	0	N03AB Hydantoin derivatives	0.601
p6m	F	N03AE	3845	13	26874	103	-0.0641834	0.937833	0.518907	1.69497	0.832	0	N03AE Benzodiazepine derivatives	0.933
p6m	F	N03AF	3841	17	26821	156	-0.193896	0.823743	0.494561	1.37203	0.456	0	N03AF Carboxamide derivatives	0.793
p6m	F	N03AG	3837	21	26824	153	-0.199682	0.818991	0.51041	1.31413	0.408	0	N03AG Fatty acid derivatives	0.768
p6m	F	N03AX	3643	215	25019	1958	-0.262927	0.768798	0.661219	0.89388	0.00063	1	N03AX Other antiepileptics	0.0121
p6m	F	N04BA	3820	38	26632	345	0.0336508	1.03422	0.734286	1.45668	0.847	0	N04BA Dopa and dopa derivatives	0.933
p6m	F	N04BB	3853	5	26948	29	0.436396	1.54712	0.592511	4.03973	0.373	0	N04BB Adamantane derivatives	0.73
p6m	F	N04BC	3833	25	26781	196	0.147561	1.159	0.759018	1.76977	0.494	0	N04BC Dopamine agonists	0.812
p6m	F	N04BD	3852	6	26902	75	-0.26656	0.76601	0.331237	1.77145	0.533	0	N04BD Monoamine oxidase B inhibitors	0.834
p6m	F	N05AB	3825	33	26668	309	-0.160898	0.851379	0.590079	1.22839	0.39	0	N05AB Phenothiazines with piperazine structure	0.754
p6m	F	N05AD	3849	9	26933	44	0.46039	1.58469	0.756509	3.31952	0.222	0	N05AD Butyrophenone derivatives [DG:DG01940]	0.574
p6m	F	N05AH	3831	27	26779	198	-0.0930897	0.911112	0.601416	1.38028	0.66	0	N05AH Diazepines, oxazepines and thiazepines	0.865
p6m	F	N05AN	3853	5	26910	67	-0.513313	0.59851	0.238791	1.50011	0.274	0	N05AN Lithium	0.602
p6m	F	N05AX	3826	32	26857	120	0.567411	1.76369	1.16786	2.66351	0.00698	-1	N05AX Other antipsychotics	0.0688
p6m	F	N05BA	3766	92	26444	533	0.242857	1.27489	1.01064	1.60822	0.0404	-1	N05BA Benzodiazepine derivatives [DG:DG01914]	0.204
p6m	F	N05BB	3853	5	26933	44	-0.298502	0.741929	0.288321	1.90919	0.536	0	N05BB Diphenylmethane derivatives	0.834
p6m	F	N05CD	3808	50	26799	178	0.864644	2.37416	1.70782	3.30048	2.7e-07	-1	N05CD Benzodiazepine derivatives	1.86e-05
p6m	F	N05CF	3790	68	26428	549	-0.0588547	0.942844	0.727193	1.22245	0.657	0	N05CF Benzodiazepine related drugs	0.865
p6m	F	N05CH	3852	6	26917	60	-0.229282	0.795104	0.338174	1.86943	0.599	0	N05CH Melatonin receptor agonists	0.862
p6m	F	N06AA	3673	185	25253	1724	-0.20545	0.814281	0.693608	0.955949	0.0121	1	N06AA Non-selective monoamine reuptake inhibitors [DG:DG01730]	0.0895
p6m	F	N06AB	3539	319	24623	2354	-0.0718855	0.930637	0.815749	1.06171	0.285	0	N06AB Selective serotonin reuptake inhibitors	0.602
p6m	F	N06AX	3688	170	25758	1219	-0.0184888	0.981681	0.824988	1.16813	0.835	0	N06AX Other antidepressants	0.933
p6m	F	N06DA	3795	63	26683	294	0.572489	1.77267	1.31521	2.38926	0.000171	-1	N06DA Anticholinesterases	0.00393
p6m	F	N06DX	3794	64	26791	186	1.09609	2.99245	2.1985	4.07312	3.28e-12	-1	N06DX Other anti-dementia drugs	3.39e-10
p6m	F	N07BC	3853	5	26963	14	0.954295	2.59684	0.879412	7.66828	0.0841	0	N07BC Drugs used in opioid dependence	0.317
p6m	F	N07CA	3820	38	26727	250	0.251964	1.28655	0.90745	1.82402	0.157	0	N07CA Antivertigo preparations	0.464
p6m	F	P01AB	3836	22	26838	139	0.10958	1.11581	0.704542	1.76715	0.64	0	P01AB Nitroimidazole derivatives	0.862
p6m	F	P01BA	3840	18	26820	157	-0.0882392	0.915542	0.557139	1.5045	0.728	0	P01BA Aminoquinolines	0.907
p6m	F	P01BC	3815	43	26514	463	-0.191995	0.825311	0.598896	1.13732	0.241	0	P01BC Methanolquinolines	0.601
p6m	F	R01AC	3851	7	26945	32	0.500716	1.6499	0.715577	3.80417	0.24	0	R01AC Antiallergic agents, excl. corticosteroids	0.601
p6m	F	R01AD	3696	162	25456	1521	-0.192812	0.824637	0.696211	0.976754	0.0256	1	R01AD Corticosteroids	0.156
p6m	F	R01AX	3853	5	26931	46	-0.229002	0.795327	0.311667	2.02955	0.632	0	R01AX Other nasal preparations	0.862
p6m	F	R03AC	3524	334	24294	2683	-0.0973091	0.907275	0.790952	1.04071	0.165	0	R03AC Selective beta-2-adrenoreceptor agonists	0.467
p6m	F	R03AK	3649	209	25334	1643	-0.0514161	0.949883	0.804334	1.12177	0.545	0	R03AK Adrenergics in combination with corticosteroids or other drugs, excl. anticholinergics	0.842
p6m	F	R03AL	3822	36	26659	318	0.00861554	1.00865	0.702728	1.44776	0.963	0	R03AL Adrenergics in combination with anticholinergics incl. triple combinations with corticosteroids	0.979
p6m	F	R03BA	3745	113	26108	869	-0.0498643	0.951358	0.771493	1.17316	0.641	0	R03BA Glucocorticoids	0.862
p6m	F	R03BB	3794	64	26307	670	-0.209396	0.811074	0.614722	1.07014	0.139	0	R03BB Anticholinergics	0.432
p6m	F	R03DA	3848	10	26896	81	0.0438999	1.04488	0.532536	2.05013	0.898	0	R03DA Xanthines	0.968
p6m	F	R03DC	3827	31	26655	322	-0.466832	0.626985	0.427749	0.919021	0.0167	1	R03DC Leukotriene receptor antagonists	0.117
p6m	F	R05CB	3808	50	26481	496	-0.124108	0.883284	0.649646	1.20095	0.428	0	R05CB Mucolytics	0.777
p6m	F	R05DA	3756	102	25940	1037	-0.283766	0.752943	0.610486	0.928642	0.00801	1	R05DA Opium alkaloids and derivatives	0.0721
p6m	F	R06AB	3845	13	26872	105	0.0236968	1.02398	0.570173	1.83898	0.937	0	R06AB Substituted alkylamines	0.977
p6m	F	R06AD	3844	14	26885	92	0.071868	1.07451	0.605748	1.90604	0.806	0	R06AD Phenothiazine derivatives	0.932
p6m	F	R06AE	3723	135	26169	808	0.287716	1.33338	1.10087	1.615	0.00325	-1	R06AE Piperazine derivatives	0.0449
p6m	F	R06AX	3762	96	26174	803	-0.165105	0.847805	0.680659	1.056	0.141	0	R06AX Other antihistamines for systemic use	0.432
p6m	F	S01AA	3818	40	26725	252	0.230781	1.25958	0.894175	1.77432	0.187	0	S01AA Antibiotics	0.503
p6m	F	S01BA	3851	7	26833	144	-0.845403	0.429384	0.199945	0.922107	0.0302	1	S01BA Corticosteroids, plain	0.165
p6m	F	S01EC	3838	20	26665	312	-0.507278	0.602132	0.381021	0.951556	0.0298	1	S01EC Carbonic anhydrase inhibitors	0.165
p6m	F	S01ED	3830	28	26576	401	-0.474053	0.622474	0.421865	0.91848	0.0169	1	S01ED Beta blocking agents	0.117
p6m	F	S01EE	3803	55	26322	655	-0.285555	0.751597	0.567441	0.995519	0.0464	1	S01EE Prostaglandin analogues	0.223
p6m	F	S01GX	3837	21	26814	163	-0.0583944	0.943278	0.592473	1.50179	0.806	0	S01GX Other antiallergics	0.932
p6m	F	S01XA	3712	146	25340	1637	-0.270582	0.762935	0.638761	0.911248	0.00283	1	S01XA Other ophthalmologicals	0.0418
p6m	F	S02AA	3852	6	26907	70	-0.38532	0.680233	0.292588	1.58146	0.371	0	S02AA Antiinfectives	0.73
p6m	F	S02CA	3852	6	26928	49	-0.217577	0.804466	0.339143	1.90824	0.622	0	S02CA Corticosteroids and antiinfectives in combination	0.862
p6m	F	V03AE	3849	9	26918	59	0.0367524	1.03744	0.500261	2.15142	0.921	0	V03AE Drugs for treatment of hyperkalemia and hyperphosphatemia	0.973
p6m	F	V06DC	3848	10	26931	46	0.666398	1.94721	0.964897	3.92957	0.0629	0	V06DC Carbohydrates	0.255
p6m	F	V07AY	3754	104	26198	779	-0.0774861	0.92544	0.742721	1.15311	0.49	0	V07AY Other non-therapeutic auxiliary products	0.812
p6m	G	A01AB	1286	32	26575	402	0.400126	1.49201	1.03139	2.15836	0.0337	-1	A01AB Antiinfectives and antiseptics for local oral treatment	0.145
p6m	G	A01AD	1306	12	26861	116	0.574115	1.77556	0.959761	3.28478	0.0674	0	A01AD Other agents for local oral treatment	0.228
p6m	G	A02BA	1283	35	26386	591	0.0373525	1.03806	0.729965	1.47619	0.835	0	A02BA H2-receptor antagonists [DG:DG01481]	0.901
p6m	G	A02BC	925	393	17691	9286	-0.349876	0.704776	0.620229	0.800847	8.1e-08	1	A02BC Proton pump inhibitors [DG:DG01646]	1.78e-06
p6m	G	A02BX	1271	47	26190	787	0.0870468	1.09095	0.802941	1.48226	0.578	0	A02BX Other drugs for peptic ulcer and gastro-oesophageal reflux disease (GORD)	0.71
p6m	G	A03AA	1305	13	26650	327	-0.249982	0.778815	0.443633	1.36724	0.384	0	A03AA Synthetic anticholinergics, esters with tertiary amino group	0.588
p6m	G	A03AX	1313	5	26828	149	-0.409294	0.664119	0.270352	1.63141	0.372	0	A03AX Other drugs for functional gastrointestinal disorders	0.585
p6m	G	A03BB	1285	33	26607	370	0.517064	1.6771	1.15927	2.42623	0.00607	-1	A03BB Belladonna alkaloids, semisynthetic, quaternary ammonium compounds	0.0396
p6m	G	A03FA	1295	23	26694	283	0.384647	1.4691	0.949409	2.27325	0.0842	0	A03FA Propulsives [DG:DG01763]	0.257
p6m	G	A04AA	1313	5	26892	85	0.119515	1.12695	0.451575	2.81242	0.798	0	A04AA Serotonin (5HT3) antagonists	0.882
p6m	G	A06AA	1251	67	26392	585	0.732896	2.0811	1.5926	2.71943	7.95e-08	-1	A06AA Softeners, emollients	1.78e-06
p6m	G	A06AB	1210	108	26155	822	0.79612	2.21692	1.78197	2.75804	9.23e-13	-1	A06AB Contact laxatives	5.41e-11
p6m	G	A06AC	1312	6	26797	180	-0.331261	0.718018	0.315803	1.6325	0.429	0	A06AC Bulk-forming laxatives	0.62
p6m	G	A06AD	1165	153	24878	2099	0.362948	1.43756	1.20065	1.72122	7.82e-05	-1	A06AD Osmotically acting laxatives	0.00106
p6m	G	A06AG	1312	6	26929	48	0.852527	2.34557	0.986928	5.57455	0.0536	0	A06AG Enemas	0.201
p6m	G	A06AX	1309	9	26843	134	0.276828	1.31894	0.663745	2.62089	0.429	0	A06AX Other drugs for constipation	0.62
p6m	G	A07AA	1297	21	26766	211	0.697823	2.00937	1.26808	3.184	0.00297	-1	A07AA Antibiotics	0.0238
p6m	G	A07DA	1285	33	26513	464	0.278449	1.32108	0.916203	1.90487	0.136	0	A07DA Antipropulsives	0.316
p6m	G	A07EC	1302	16	26657	320	-0.013828	0.986267	0.592876	1.64068	0.958	0	A07EC Aminosalicylic acid and similar agents	0.985
p6m	G	A10AB	1238	80	26049	928	0.167834	1.18274	0.898322	1.55721	0.232	0	A10AB Insulins and analogues for injection, fast-acting	0.404
p6m	G	A10AC	1305	13	26843	134	0.270964	1.31123	0.726253	2.36739	0.369	0	A10AC Insulins and analogues for injection, intermediate-acting	0.585
p6m	G	A10AD	1291	27	26767	210	0.414716	1.51394	0.98306	2.33151	0.0598	0	A10AD Insulins and analogues for injection, intermediate- or long-acting combined with fast-acting	0.215
p6m	G	A10AE	1296	22	26650	327	-0.149945	0.860755	0.544759	1.36005	0.521	0	A10AE Insulins and analogues for injection, long-acting	0.669
p6m	G	A10BA	1196	122	25112	1865	-0.151308	0.859583	0.683737	1.08065	0.195	0	A10BA Biguanides [DG:DG01684]	0.377
p6m	G	A10BB	1286	32	26379	598	-0.424305	0.654224	0.445744	0.960214	0.0302	1	A10BB Sulfonylureas	0.133
p6m	G	A10BH	1283	35	26443	534	-0.222359	0.800628	0.552728	1.15971	0.239	0	A10BH Dipeptidyl peptidase 4 (DPP-4) inhibitors [DG:DG01601]	0.404
p6m	G	A10BJ	1309	9	26813	164	-0.520396	0.594285	0.297639	1.18659	0.14	0	A10BJ Glucagon-like peptide-1 receptor (GLP-1) analogues	0.316
p6m	G	A10BK	1298	20	26729	248	-0.0382379	0.962484	0.596029	1.55425	0.876	0	A10BK Sodium-glucose co-transporter 2 (SGLT2) inhibitors	0.918
p6m	G	A11CC	1272	46	26290	687	0.104678	1.11035	0.810676	1.52081	0.514	0	A11CC Vitamin D and analogues	0.669
p6m	G	A11DA	1289	29	26709	268	0.60076	1.8235	1.22092	2.72349	0.00333	-1	A11DA Vitamin B1, plain	0.0255
p6m	G	A11EX	1313	5	26845	132	-0.488402	0.613606	0.248524	1.515	0.289	0	A11EX Vitamin B-complex, other combinations	0.475
p6m	G	A12AX	1161	157	24103	2874	0.147283	1.15868	0.969372	1.38496	0.106	0	A12AX Calcium, combinations with vitamin D and/or other drugs	0.277
p6m	G	B01AA	1288	30	26338	639	-0.236901	0.789069	0.540453	1.15205	0.22	0	B01AA Vitamin K antagonists	0.399
p6m	G	B01AB	1310	8	26858	119	0.268456	1.30794	0.632708	2.7038	0.469	0	B01AB Heparin group	0.645
p6m	G	B01AC	1112	206	23000	3977	-0.196494	0.821606	0.692565	0.97469	0.0242	1	B01AC Platelet aggregation inhibitors excl. heparin	0.112
p6m	G	B01AF	1201	117	24925	2052	0.0841106	1.08775	0.888802	1.33123	0.414	0	B01AF Direct factor Xa inhibitors	0.617
p6m	G	B03AA	1240	78	26001	976	0.29508	1.34323	1.04957	1.71906	0.0191	-1	B03AA Iron bivalent, oral preparations	0.096
p6m	G	B03BA	1268	50	26279	698	0.261272	1.29858	0.963589	1.75003	0.0861	0	B03BA Vitamin B12 (cyanocobalamin and analogues)	0.257
p6m	G	B03BB	1245	73	26049	928	0.341782	1.40745	1.09345	1.81164	0.00797	-1	B03BB Folic acid and derivatives	0.0501
p6m	G	B05CB	1310	8	26903	74	0.568911	1.76634	0.838921	3.71902	0.134	0	B05CB Salt solutions	0.316
p6m	G	B05XA	1313	5	26888	89	-0.228365	0.795834	0.316805	1.99918	0.627	0	B05XA Electrolyte solutions	0.751
p6m	G	C01AA	1303	15	26619	358	-0.31623	0.728892	0.43048	1.23416	0.239	0	C01AA Digitalis glycosides [DG:DG01697]	0.404
p6m	G	C01CA	1312	6	26906	71	0.650174	1.91587	0.823927	4.45497	0.131	0	C01CA Adrenergic and dopaminergic agents	0.316
p6m	G	C01DA	1250	68	25901	1076	-0.0498653	0.951358	0.722391	1.2529	0.723	0	C01DA Organic nitrates	0.843
p6m	G	C01DX	1305	13	26777	200	-0.119919	0.886992	0.495976	1.58628	0.686	0	C01DX Other vasodilators used in cardiac diseases	0.81
p6m	G	C01EB	1309	9	26806	171	-0.269769	0.763556	0.38417	1.5176	0.441	0	C01EB Other cardiac preparations	0.621
p6m	G	C02CA	1283	35	26195	782	-0.378791	0.684689	0.481236	0.974156	0.0352	1	C02CA Alpha-adrenoreceptor antagonists	0.148
p6m	G	C03AA	1274	44	26021	956	-0.109203	0.896548	0.654196	1.22868	0.497	0	C03AA Thiazides, plain [DG:DG01749]	0.664
p6m	G	C03BA	1282	36	26335	642	0.0297387	1.03019	0.728472	1.45686	0.866	0	C03BA Sulfonamides, plain	0.913
p6m	G	C03CA	1200	118	25325	1652	0.150662	1.1626	0.941206	1.43608	0.162	0	C03CA Sulfonamides, plain	0.326
p6m	G	C03DA	1291	27	26452	525	-0.240857	0.785954	0.526422	1.17344	0.239	0	C03DA Aldosterone antagonists	0.404
p6m	G	C05AX	1305	13	26678	299	-0.212531	0.808535	0.460451	1.41976	0.459	0	C05AX Other agents for treatment of hemorrhoids and anal fissures for topical use	0.636
p6m	G	C07AA	1303	15	26651	326	-0.0564329	0.94513	0.559444	1.59671	0.833	0	C07AA Beta blocking agents, non-selective	0.901
p6m	G	C07AB	1132	186	22972	4005	-0.298875	0.741652	0.622895	0.883051	0.000789	1	C07AB Beta blocking agents, selective	0.00731
p6m	G	C07AG	1310	8	26881	96	0.255481	1.29108	0.617698	2.69856	0.497	0	C07AG Alpha and beta blocking agents	0.664
p6m	G	C08CA	1103	215	22493	4484	-0.186339	0.829992	0.708217	0.972707	0.0214	1	C08CA Dihydropyridine derivatives [DG:DG01928]	0.105
p6m	G	C08DB	1307	11	26600	377	-0.67942	0.506911	0.275614	0.932315	0.0289	1	C08DB Benzothiazepine derivatives	0.13
p6m	G	C09AA	1132	186	22656	4321	-0.345478	0.707882	0.598903	0.836692	5.12e-05	1	C09AA ACE inhibitors, plain [DG:DG01501]	0.000751
p6m	G	C09CA	1208	110	24281	2696	-0.363222	0.695432	0.565307	0.85551	0.00059	1	C09CA Angiotensin II receptor blockers, plain [DG:DG01495]	0.00627
p6m	G	C10AA	895	423	17425	9552	-0.40462	0.66723	0.585335	0.760584	1.41e-09	1	C10AA HMG CoA reductase inhibitors [DG:DG01660]	6.2e-08
p6m	G	C10AB	1309	9	26820	157	-0.0706712	0.931768	0.470085	1.84688	0.84	0	C10AB Fibrates	0.901
p6m	G	C10AX	1300	18	26596	381	-0.208749	0.811599	0.500641	1.3157	0.397	0	C10AX Other lipid modifying agents	0.602
p6m	G	D01AC	1259	59	26266	711	0.345203	1.41228	1.06935	1.86517	0.015	-1	D01AC Imidazole and triazole derivatives	0.0825
p6m	G	D01AE	1312	6	26857	120	-0.130413	0.877733	0.382927	2.01191	0.758	0	D01AE Other antifungals for topical use	0.861
p6m	G	D01BA	1312	6	26917	60	0.617017	1.85339	0.783471	4.38441	0.16	0	D01BA Antifungals for systemic use	0.326
p6m	G	D02AC	1298	20	26488	489	-0.274283	0.760117	0.482046	1.1986	0.238	0	D02AC Soft paraffin and fat products	0.404
p6m	G	D02AE	1308	10	26834	143	0.214631	1.2394	0.646671	2.37543	0.518	0	D02AE Carbamide products	0.669
p6m	G	D02AX	1197	121	25362	1615	0.284625	1.32926	1.08767	1.62452	0.00542	-1	D02AX Other emollients and protectives	0.0367
p6m	G	D05AX	1310	8	26800	177	-0.22872	0.795551	0.387901	1.63161	0.532	0	D05AX Other antipsoriatics for topical use	0.674
p6m	G	D06AX	1308	10	26771	206	-0.181076	0.834372	0.43392	1.60439	0.587	0	D06AX Other antibiotics for topical use	0.712
p6m	G	D07AA	1303	15	26751	226	0.275132	1.3167	0.773386	2.24172	0.311	0	D07AA Corticosteroids, weak (group I)	0.507
p6m	G	D07AB	1300	18	26760	217	0.506067	1.65875	1.01643	2.707	0.0428	-1	D07AB Corticosteroids, moderately potent (group II)	0.171
p6m	G	D07AC	1279	39	26289	688	0.0933114	1.0978	0.787953	1.5295	0.581	0	D07AC Corticosteroids, potent (group III)	0.71
p6m	G	D07AD	1305	13	26782	195	0.359989	1.43331	0.810625	2.53433	0.216	0	D07AD Corticosteroids, very potent (group IV)	0.399
p6m	G	D07CA	1309	9	26890	87	0.640527	1.89748	0.946344	3.80457	0.0711	0	D07CA Corticosteroids, weak, combinations with antibiotics	0.236
p6m	G	D07CC	1303	15	26779	198	0.336207	1.39963	0.820896	2.38637	0.217	0	D07CC Corticosteroids, potent, combinations with antibiotics	0.399
p6m	G	D09AA	1312	6	26921	56	0.608898	1.83841	0.780223	4.33175	0.164	0	D09AA Medicated dressings with antiinfectives	0.326
p6m	G	D11AC	1312	6	26883	94	0.00342987	1.00344	0.433803	2.32106	0.994	0	D11AC Medicated shampoos	0.998
p6m	G	G01AF	1304	14	26804	173	0.48045	1.6168	0.925272	2.82517	0.0916	0	G01AF Imidazole derivatives	0.261
p6m	G	G03BA	1312	6	26895	82	-0.0150304	0.985082	0.419211	2.31479	0.973	0	G03BA 3-oxoandrosten (4) derivatives	0.986
p6m	G	G03CA	1284	34	25869	1108	-0.250841	0.778146	0.545969	1.10906	0.165	0	G03CA Natural and semisynthetic estrogens, plain	0.326
p6m	G	G04BD	1280	38	26051	926	-0.332747	0.716952	0.512643	1.00269	0.0519	0	G04BD Urinary antispasmodics	0.199
p6m	G	G04BE	1273	45	26265	712	0.0408053	1.04165	0.760421	1.42688	0.799	0	G04BE Drugs used in erectile dysfunction	0.882
p6m	G	G04CA	1311	7	26859	118	-0.101284	0.903677	0.415603	1.96493	0.798	0	G04CA Alpha-adrenoreceptor antagonists	0.882
p6m	G	G04CB	1286	32	26132	845	-0.459088	0.63186	0.43833	0.910836	0.0139	1	G04CB Testosterone-5-alpha reductase inhibitors	0.0825
p6m	G	H02AA	1312	6	26900	77	0.366042	1.44202	0.613766	3.38795	0.401	0	H02AA Mineralocorticoids	0.603
p6m	G	H02AB	1196	122	25408	1569	0.47202	1.60323	1.30848	1.96437	5.28e-06	-1	H02AB Glucocorticoids	9.29e-05
p6m	G	H03AA	1237	81	24575	2402	-0.412975	0.661679	0.523356	0.83656	0.000558	1	H03AA Thyroid hormones	0.00627
p6m	G	J01AA	1198	120	25851	1126	0.791149	2.20593	1.79733	2.70742	3.85e-14	-1	J01AA Tetracyclines [DG:DG01197]	3.39e-12
p6m	G	J01CA	1161	157	25554	1423	0.82738	2.28732	1.90965	2.73968	2.71e-19	-1	J01CA Penicillins with extended spectrum [DG:DG01780]	4.77e-17
p6m	G	J01CE	1310	8	26802	175	-0.134263	0.87436	0.42719	1.78961	0.713	0	J01CE Beta-lactamase sensitive penicillins [DG:DG01778]	0.837
p6m	G	J01CF	1239	79	26064	913	0.475425	1.6087	1.2628	2.04933	0.000119	-1	J01CF Beta-lactamase resistant penicillins [DG:DG01779]	0.0015
p6m	G	J01CR	1273	45	26483	494	0.54791	1.72963	1.26053	2.37331	0.000689	-1	J01CR Combinations of penicillins, incl. beta-lactamase inhibitors	0.00674
p6m	G	J01DB	1303	15	26702	275	0.0865612	1.09042	0.642814	1.8497	0.748	0	J01DB First-generation cephalosporins [DG:DG01774]	0.855
p6m	G	J01EA	1288	30	26534	443	0.241613	1.2733	0.869982	1.8636	0.214	0	J01EA Trimethoprim and derivatives [DG:DG01581]	0.399
p6m	G	J01EE	1312	6	26905	72	0.465219	1.59236	0.685127	3.70095	0.28	0	J01EE Combinations of sulfonamides and trimethoprim, incl. derivatives	0.465
p6m	G	J01FA	1265	53	26328	649	0.451007	1.56989	1.17116	2.10438	0.00256	-1	J01FA Macrolides [DG:DG01551]	0.0215
p6m	G	J01FF	1313	5	26944	33	0.972246	2.64388	1.01528	6.88487	0.0465	-1	J01FF Lincosamides [DG:DG01578]	0.182
p6m	G	J01MA	1304	14	26716	261	-0.00878109	0.991257	0.574248	1.71109	0.975	0	J01MA Fluoroquinolones [DG:DG01549]	0.986
p6m	G	J01XE	1234	84	25539	1438	0.192853	1.2127	0.962105	1.52858	0.102	0	J01XE Nitrofuran derivatives	0.276
p6m	G	J02AC	1306	12	26811	166	0.460805	1.58535	0.875926	2.86934	0.128	0	J02AC Triazole derivatives	0.316
p6m	G	J05AB	1303	15	26763	214	0.390579	1.47784	0.866924	2.51925	0.151	0	J05AB Nucleosides and nucleotides excl. reverse transcriptase inhibitors [DG:DG02840]	0.326
p6m	G	L01BC	1312	6	26887	90	0.498545	1.64632	0.715859	3.78619	0.241	0	L01BC Pyrimidine analogues	0.404
p6m	G	L02AE	1307	11	26718	259	-0.243194	0.784119	0.424347	1.44891	0.438	0	L02AE Gonadotropin releasing hormone analogues	0.621
p6m	G	L02BG	1309	9	26643	334	-0.402379	0.668727	0.341951	1.30778	0.24	0	L02BG Aromatase inhibitors [DG:DG01596]	0.404
p6m	G	L04AA	1312	6	26914	63	0.608308	1.83732	0.784645	4.30226	0.161	0	L04AA Selective immunosuppressants	0.326
p6m	G	L04AX	1305	13	26649	328	-0.225018	0.798502	0.45558	1.39955	0.432	0	L04AX Other immunosuppressants	0.62
p6m	G	M01AB	1311	7	26856	121	0.127944	1.13649	0.525702	2.45692	0.745	0	M01AB Acetic acid derivatives and related substances	0.855
p6m	G	M01AE	1271	47	25776	1201	-0.24785	0.780477	0.578705	1.0526	0.104	0	M01AE Propionic acid derivatives	0.277
p6m	G	M01AH	1312	6	26861	116	0.0851296	1.08886	0.476031	2.49062	0.84	0	M01AH Coxibs	0.901
p6m	G	M02AA	1233	85	25691	1286	0.180249	1.19752	0.948305	1.51222	0.13	0	M02AA Antiinflammatory preparations, non-steroids for topical use	0.316
p6m	G	M03BX	1306	12	26832	145	0.377291	1.45833	0.798384	2.66378	0.22	0	M03BX Other centrally acting agents	0.399
p6m	G	M04AA	1265	53	26098	879	-0.0439141	0.957036	0.713682	1.28337	0.769	0	M04AA Preparations inhibiting uric acid production	0.868
p6m	G	M04AC	1307	11	26830	147	0.196708	1.21739	0.652172	2.27246	0.537	0	M04AC Preparations with no effect on uric acid metabolism	0.675
p6m	G	M05BA	1262	56	25918	1059	0.211449	1.23547	0.932708	1.6365	0.14	0	M05BA Bisphosphonates [DG:DG01600]	0.316
p6m	G	N01BB	1304	14	26773	204	0.141157	1.15161	0.660251	2.00862	0.619	0	N01BB Amides	0.746
p6m	G	N01BX	1313	5	26900	77	0.0799931	1.08328	0.43102	2.7226	0.865	0	N01BX Other local anesthetics	0.913
p6m	G	N02AA	1230	88	26022	955	0.532837	1.70376	1.34771	2.15386	8.42e-06	-1	N02AA Natural opium alkaloids	0.000135
p6m	G	N02AB	1308	10	26857	120	0.321625	1.37937	0.710965	2.67616	0.342	0	N02AB Phenylpiperidine derivatives	0.552
p6m	G	N02AE	1294	24	26688	289	0.335204	1.39823	0.90904	2.15066	0.127	0	N02AE Oripavine derivatives	0.316
p6m	G	N02AJ	1217	101	25072	1905	-0.0209188	0.979298	0.791696	1.21136	0.847	0	N02AJ Opioids in combination with non-opioid analgesics	0.903
p6m	G	N02AX	1282	36	26227	750	-0.246842	0.781264	0.552706	1.10434	0.162	0	N02AX Other opioids	0.326
p6m	G	N02BE	1004	314	22021	4956	0.169522	1.18474	1.02978	1.36302	0.0178	-1	N02BE Anilides	0.0921
p6m	G	N02BG	1312	6	26916	61	0.620361	1.8596	0.79351	4.35799	0.153	0	N02BG Other analgesics and antipyretics	0.326
p6m	G	N02CC	1311	7	26712	265	-0.512898	0.598758	0.281087	1.27545	0.184	0	N02CC Selective serotonin (5HT1) agonists [DG:DG01943]	0.36
p6m	G	N03AB	1313	5	26933	44	0.604181	1.82975	0.709187	4.7209	0.211	0	N03AB Hydantoin derivatives	0.399
p6m	G	N03AF	1307	11	26821	156	0.251329	1.28573	0.690234	2.395	0.428	0	N03AF Carboxamide derivatives	0.62
p6m	G	N03AG	1309	9	26824	153	-0.240497	0.786237	0.391853	1.57755	0.498	0	N03AG Fatty acid derivatives	0.664
p6m	G	N03AX	1186	132	25019	1958	0.18281	1.20059	0.989802	1.45626	0.0635	0	N03AX Other antiepileptics	0.221
p6m	G	N04BA	1294	24	26632	345	0.361067	1.43486	0.939182	2.19214	0.095	0	N04BA Dopa and dopa derivatives	0.261
p6m	G	N04BB	1313	5	26948	29	1.37828	3.96806	1.51964	10.3613	0.00489	-1	N04BB Adamantane derivatives	0.0344
p6m	G	N04BC	1303	15	26781	196	0.472394	1.60383	0.941149	2.73312	0.0824	0	N04BC Dopamine agonists	0.257
p6m	G	N04BD	1312	6	26902	75	0.609159	1.83888	0.791293	4.27338	0.157	0	N04BD Monoamine oxidase B inhibitors	0.326
p6m	G	N05AB	1295	23	26668	309	0.377983	1.45934	0.946023	2.25118	0.0874	0	N05AB Phenothiazines with piperazine structure	0.257
p6m	G	N05AD	1310	8	26933	44	1.13126	3.09957	1.42189	6.75675	0.00444	-1	N05AD Butyrophenone derivatives [DG:DG01940]	0.0326
p6m	G	N05AH	1308	10	26779	198	-0.218212	0.803955	0.420052	1.53872	0.51	0	N05AH Diazepines, oxazepines and thiazepines	0.669
p6m	G	N05AX	1298	20	26857	120	0.877732	2.40544	1.45652	3.97258	0.000606	-1	N05AX Other antipsychotics	0.00627
p6m	G	N05BA	1272	46	26444	533	0.493497	1.63803	1.19453	2.2462	0.00219	-1	N05BA Benzodiazepine derivatives [DG:DG01914]	0.0193
p6m	G	N05CD	1285	33	26799	178	1.19298	3.2969	2.22899	4.87645	2.35e-09	-1	N05CD Benzodiazepine derivatives	8.27e-08
p6m	G	N05CF	1288	30	26428	549	0.0116323	1.0117	0.69363	1.47563	0.952	0	N05CF Benzodiazepine related drugs	0.985
p6m	G	N05CH	1313	5	26917	60	0.306468	1.35862	0.532643	3.46544	0.521	0	N05CH Melatonin receptor agonists	0.669
p6m	G	N06AA	1236	82	25253	1724	-0.0828922	0.92045	0.727649	1.16434	0.489	0	N06AA Non-selective monoamine reuptake inhibitors [DG:DG01730]	0.664
p6m	G	N06AB	1200	118	24623	2354	-0.0626519	0.93927	0.763405	1.15565	0.554	0	N06AB Selective serotonin reuptake inhibitors	0.692
p6m	G	N06AX	1234	84	25758	1219	0.17373	1.18973	0.933682	1.51601	0.16	0	N06AX Other antidepressants	0.326
p6m	G	N06DA	1289	29	26683	294	0.510536	1.66618	1.0951	2.53509	0.0171	-1	N06DA Anticholinesterases	0.0912
p6m	G	N06DX	1287	31	26791	186	1.08284	2.95306	1.95756	4.45483	2.46e-07	-1	N06DX Other anti-dementia drugs	4.81e-06
p6m	G	N07CA	1301	17	26727	250	0.222985	1.2498	0.757727	2.06143	0.383	0	N07CA Antivertigo preparations	0.588
p6m	G	P01AB	1306	12	26838	139	0.566937	1.76286	0.967635	3.21162	0.064	0	P01AB Nitroimidazole derivatives	0.221
p6m	G	P01BA	1308	10	26820	157	0.183529	1.20145	0.627076	2.30192	0.58	0	P01BA Aminoquinolines	0.71
p6m	G	P01BC	1292	26	26514	463	-0.0519789	0.949349	0.631827	1.42644	0.802	0	P01BC Methanolquinolines	0.882
p6m	G	R01AD	1260	58	25456	1521	-0.281437	0.754698	0.574886	0.990752	0.0427	1	R01AD Corticosteroids	0.171
p6m	G	R01AX	1313	5	26931	46	0.687252	1.98824	0.778169	5.08002	0.151	0	R01AX Other nasal preparations	0.326
p6m	G	R03AC	1163	155	24294	2683	0.090475	1.09469	0.894389	1.33986	0.38	0	R03AC Selective beta-2-adrenoreceptor agonists	0.588
p6m	G	R03AK	1229	89	25334	1643	0.0159201	1.01605	0.792288	1.303	0.9	0	R03AK Adrenergics in combination with corticosteroids or other drugs, excl. anticholinergics	0.937
p6m	G	R03AL	1293	25	26659	318	0.356527	1.42836	0.925822	2.20368	0.107	0	R03AL Adrenergics in combination with anticholinergics incl. triple combinations with corticosteroids	0.277
p6m	G	R03BA	1287	31	26108	869	-0.321584	0.725	0.498325	1.05478	0.0927	0	R03BA Glucocorticoids	0.261
p6m	G	R03BB	1285	33	26307	670	-0.179097	0.836025	0.571655	1.22266	0.356	0	R03BB Anticholinergics	0.57
p6m	G	R03DA	1313	5	26896	81	-0.00117713	0.998824	0.397077	2.51248	0.998	0	R03DA Xanthines	0.998
p6m	G	R03DC	1307	11	26655	322	-0.604416	0.546393	0.294355	1.01424	0.0555	0	R03DC Leukotriene receptor antagonists	0.203
p6m	G	R05CB	1286	32	26481	496	0.122761	1.13061	0.77042	1.65921	0.53	0	R05CB Mucolytics	0.674
p6m	G	R05DA	1265	53	25940	1037	0.00683494	1.00686	0.757012	1.33916	0.963	0	R05DA Opium alkaloids and derivatives	0.985
p6m	G	R06AB	1308	10	26872	105	0.5804	1.78675	0.924056	3.45486	0.0845	0	R06AB Substituted alkylamines	0.257
p6m	G	R06AD	1308	10	26885	92	0.608381	1.83746	0.943826	3.57719	0.0735	0	R06AD Phenothiazine derivatives	0.24
p6m	G	R06AE	1236	82	26169	808	0.681374	1.97659	1.55262	2.51633	3.2e-08	-1	R06AE Piperazine derivatives	9.39e-07
p6m	G	R06AX	1280	38	26174	803	-0.13453	0.874127	0.624531	1.22347	0.433	0	R06AX Other antihistamines for systemic use	0.62
p6m	G	S01AA	1295	23	26725	252	0.505081	1.65712	1.06802	2.57116	0.0242	-1	S01AA Antibiotics	0.112
p6m	G	S01BA	1312	6	26833	144	-0.198787	0.819724	0.359253	1.8704	0.637	0	S01BA Corticosteroids, plain	0.758
p6m	G	S01EC	1308	10	26665	312	-0.482095	0.617489	0.326472	1.16792	0.138	0	S01EC Carbonic anhydrase inhibitors	0.316
p6m	G	S01ED	1309	9	26576	401	-0.833793	0.434398	0.222681	0.847411	0.0145	1	S01ED Beta blocking agents	0.0825
p6m	G	S01EE	1298	20	26322	655	-0.561917	0.570115	0.36268	0.896193	0.0149	1	S01EE Prostaglandin analogues	0.0825
p6m	G	S01GX	1308	10	26814	163	0.107622	1.11363	0.582154	2.1303	0.745	0	S01GX Other antiallergics	0.855
p6m	G	S01XA	1248	70	25340	1637	-0.22016	0.802391	0.623214	1.03308	0.0877	0	S01XA Other ophthalmologicals	0.257
p6m	G	S02AA	1313	5	26907	70	0.349547	1.41843	0.567793	3.54342	0.454	0	S02AA Antiinfectives	0.634
p6m	G	V03AE	1309	9	26918	59	0.642306	1.90086	0.894975	4.03728	0.0947	0	V03AE Drugs for treatment of hyperkalemia and hyperphosphatemia	0.261
p6m	G	V06DC	1312	6	26931	46	0.689316	1.99235	0.830091	4.78196	0.123	0	V06DC Carbohydrates	0.314
p6m	G	V07AY	1256	62	26198	779	0.176213	1.19269	0.899058	1.58223	0.222	0	V07AY Other non-therapeutic auxiliary products	0.399
p6m	H	A02BA	162	8	26386	591	0.566831	1.76267	0.846819	3.66905	0.13	0	A02BA H2-receptor antagonists [DG:DG01481]	0.253
p6m	H	A02BC	107	63	17691	9286	-0.172296	0.84173	0.606312	1.16855	0.303	0	A02BC Proton pump inhibitors [DG:DG01646]	0.406
p6m	H	A02BX	161	9	26190	787	0.435168	1.54522	0.775157	3.0803	0.216	0	A02BX Other drugs for peptic ulcer and gastro-oesophageal reflux disease (GORD)	0.32
p6m	H	A03BB	152	18	26607	370	2.1083	8.23425	4.85155	13.9755	5.85e-15	-1	A03BB Belladonna alkaloids, semisynthetic, quaternary ammonium compounds	1.62e-13
p6m	H	A03FA	162	8	26694	283	1.41236	4.10564	1.9549	8.62255	0.000191	-1	A03FA Propulsives [DG:DG01763]	0.000721
p6m	H	A06AA	158	12	26392	585	0.846208	2.33079	1.26473	4.29546	0.00667	-1	A06AA Softeners, emollients	0.0179
p6m	H	A06AB	136	34	26155	822	1.49545	4.46133	2.95998	6.72419	9.26e-13	-1	A06AB Contact laxatives	1.92e-11
p6m	H	A06AD	131	39	24878	2099	0.841568	2.32	1.59689	3.37057	1.01e-05	-1	A06AD Osmotically acting laxatives	6.64e-05
p6m	H	A07AA	165	5	26766	211	1.39822	4.04801	1.61114	10.1707	0.00294	-1	A07AA Antibiotics	0.00939
p6m	H	A07DA	164	6	26513	464	0.540559	1.71697	0.741259	3.97698	0.207	0	A07DA Antipropulsives	0.312
p6m	H	A10AB	153	17	26049	928	0.816449	2.26245	1.20829	4.23631	0.0107	-1	A10AB Insulins and analogues for injection, fast-acting	0.0261
p6m	H	A10AD	165	5	26767	210	0.634345	1.88579	0.711503	4.99814	0.202	0	A10AD Insulins and analogues for injection, intermediate- or long-acting combined with fast-acting	0.31
p6m	H	A10AE	163	7	26650	327	0.821667	2.27429	0.977876	5.28941	0.0564	0	A10AE Insulins and analogues for injection, long-acting	0.13
p6m	H	A10BA	154	16	25112	1865	-0.34465	0.708468	0.388045	1.29348	0.262	0	A10BA Biguanides [DG:DG01684]	0.362
p6m	H	A10BB	164	6	26379	598	-0.307141	0.735547	0.302811	1.78669	0.498	0	A10BB Sulfonylureas	0.59
p6m	H	A10BH	163	7	26443	534	-0.00626441	0.993755	0.43138	2.28928	0.988	0	A10BH Dipeptidyl peptidase 4 (DPP-4) inhibitors [DG:DG01601]	0.996
p6m	H	A11CC	161	9	26290	687	0.461715	1.58679	0.787774	3.19624	0.196	0	A11CC Vitamin D and analogues	0.307
p6m	H	A11DA	161	9	26709	268	1.45013	4.26368	2.0722	8.77279	8.19e-05	-1	A11DA Vitamin B1, plain	0.00034
p6m	H	A12AX	144	26	24103	2874	0.295031	1.34317	0.867531	2.07958	0.186	0	A12AX Calcium, combinations with vitamin D and/or other drugs	0.297
p6m	H	B01AC	131	39	23000	3977	-0.0064933	0.993528	0.671312	1.4704	0.974	0	B01AC Platelet aggregation inhibitors excl. heparin	0.996
p6m	H	B01AF	145	25	24925	2052	0.223969	1.25103	0.805288	1.9435	0.319	0	B01AF Direct factor Xa inhibitors	0.42
p6m	H	B03AA	152	18	26001	976	0.759166	2.13649	1.27891	3.56913	0.00374	-1	B03AA Iron bivalent, oral preparations	0.0115
p6m	H	B03BA	162	8	26279	698	0.341222	1.40667	0.679932	2.91016	0.358	0	B03BA Vitamin B12 (cyanocobalamin and analogues)	0.45
p6m	H	B03BB	151	19	26049	928	0.919766	2.5087	1.52489	4.12724	0.000294	-1	B03BB Folic acid and derivatives	0.00106
p6m	H	C01AA	164	6	26619	358	0.299825	1.34962	0.578523	3.1485	0.488	0	C01AA Digitalis glycosides [DG:DG01697]	0.587
p6m	H	C01DA	161	9	25901	1076	-0.34043	0.711464	0.345312	1.46587	0.356	0	C01DA Organic nitrates	0.45
p6m	H	C02CA	164	6	26195	782	-0.40627	0.66613	0.288544	1.53782	0.341	0	C02CA Alpha-adrenoreceptor antagonists	0.442
p6m	H	C03AA	162	8	26021	956	-0.0570882	0.944511	0.455796	1.95724	0.878	0	C03AA Thiazides, plain [DG:DG01749]	0.943
p6m	H	C03BA	159	11	26335	642	0.838954	2.31395	1.23212	4.34564	0.00908	-1	C03BA Sulfonamides, plain	0.0228
p6m	H	C03CA	145	25	25325	1652	0.315282	1.37065	0.8641	2.17413	0.18	0	C03CA Sulfonamides, plain	0.293
p6m	H	C07AB	130	40	22972	4005	-0.0103868	0.989667	0.669844	1.46219	0.958	0	C07AB Beta blocking agents, selective	0.994
p6m	H	C08CA	135	35	22493	4484	-0.176762	0.837979	0.567032	1.23839	0.375	0	C08CA Dihydropyridine derivatives [DG:DG01928]	0.458
p6m	H	C09AA	139	31	22656	4321	-0.327763	0.720534	0.4791	1.08363	0.115	0	C09AA ACE inhibitors, plain [DG:DG01501]	0.233
p6m	H	C09CA	150	20	24281	2696	-0.222103	0.800833	0.494207	1.2977	0.367	0	C09CA Angiotensin II receptor blockers, plain [DG:DG01495]	0.455
p6m	H	C10AA	95	75	17425	9552	-0.237651	0.788478	0.57008	1.09054	0.151	0	C10AA HMG CoA reductase inhibitors [DG:DG01660]	0.272
p6m	H	D01AC	153	17	26266	711	1.0261	2.79017	1.6486	4.72222	0.000132	-1	D01AC Imidazole and triazole derivatives	0.000522
p6m	H	D02AE	165	5	26834	143	1.32915	3.77783	1.49405	9.55259	0.00498	-1	D02AE Carbamide products	0.0146
p6m	H	D02AX	138	32	25362	1615	0.873451	2.39516	1.59641	3.59356	2.45e-05	-1	D02AX Other emollients and protectives	0.000127
p6m	H	D07AC	161	9	26289	688	0.519249	1.68077	0.844535	3.345	0.139	0	D07AC Corticosteroids, potent (group III)	0.262
p6m	H	G04BD	161	9	26051	926	0.0702593	1.07279	0.539043	2.13502	0.841	0	G04BD Urinary antispasmodics	0.918
p6m	H	G04BE	162	8	26265	712	0.419993	1.52195	0.732346	3.1629	0.26	0	G04BE Drugs used in erectile dysfunction	0.362
p6m	H	G04CA	165	5	26859	118	1.34258	3.82891	1.49649	9.79667	0.0051	-1	G04CA Alpha-adrenoreceptor antagonists	0.0146
p6m	H	G04CB	164	6	26132	845	-0.620035	0.537925	0.233627	1.23857	0.145	0	G04CB Testosterone-5-alpha reductase inhibitors	0.267
p6m	H	H02AB	144	26	25408	1569	1.00868	2.74199	1.751	4.29385	1.05e-05	-1	H02AB Glucocorticoids	6.64e-05
p6m	H	H03AA	151	19	24575	2402	0.279138	1.32199	0.79995	2.18471	0.276	0	H03AA Thyroid hormones	0.376
p6m	H	J01AA	148	22	25851	1126	1.16833	3.21661	2.00019	5.1728	1.44e-06	-1	J01AA Tetracyclines [DG:DG01197]	1.33e-05
p6m	H	J01CA	136	34	25554	1423	1.32639	3.76741	2.53792	5.59251	4.76e-11	-1	J01CA Penicillins with extended spectrum [DG:DG01780]	7.9e-10
p6m	H	J01CF	149	21	26064	913	1.0727	2.92326	1.81139	4.71763	1.12e-05	-1	J01CF Beta-lactamase resistant penicillins [DG:DG01779]	6.64e-05
p6m	H	J01CR	160	10	26483	494	1.11637	3.05375	1.57732	5.91217	0.000927	-1	J01CR Combinations of penicillins, incl. beta-lactamase inhibitors	0.00308
p6m	H	J01EA	163	7	26534	443	0.477713	1.61238	0.731891	3.55214	0.236	0	J01EA Trimethoprim and derivatives [DG:DG01581]	0.344
p6m	H	J01FA	159	11	26328	649	0.903392	2.46796	1.30463	4.66863	0.00548	-1	J01FA Macrolides [DG:DG01551]	0.0152
p6m	H	J01XE	150	20	25539	1438	0.665794	1.94604	1.19767	3.16201	0.00718	-1	J01XE Nitrofuran derivatives	0.0186
p6m	H	M01AE	163	7	25776	1201	0.0977595	1.1027	0.509538	2.38636	0.804	0	M01AE Propionic acid derivatives	0.902
p6m	H	M02AA	153	17	25691	1286	0.367604	1.44427	0.857005	2.43396	0.167	0	M02AA Antiinflammatory preparations, non-steroids for topical use	0.279
p6m	H	M04AA	161	9	26098	879	-0.0734902	0.929145	0.460694	1.87394	0.837	0	M04AA Preparations inhibiting uric acid production	0.918
p6m	H	M05BA	153	17	25918	1059	0.936801	2.5518	1.50871	4.31606	0.000477	-1	M05BA Bisphosphonates [DG:DG01600]	0.00165
p6m	H	N02AA	136	34	26022	955	1.76861	5.86268	3.90926	8.7922	1.25e-17	-1	N02AA Natural opium alkaloids	5.19e-16
p6m	H	N02AE	159	11	26688	289	1.43861	4.21485	2.18826	8.11829	1.7e-05	-1	N02AE Oripavine derivatives	9.41e-05
p6m	H	N02AJ	151	19	25072	1905	0.344643	1.41149	0.86474	2.30392	0.168	0	N02AJ Opioids in combination with non-opioid analgesics	0.279
p6m	H	N02AX	165	5	26227	750	-0.122537	0.884673	0.356801	2.19351	0.791	0	N02AX Other opioids	0.899
p6m	H	N02BE	96	74	22021	4956	0.831183	2.29603	1.65859	3.17846	5.49e-07	-1	N02BE Anilides	6.51e-06
p6m	H	N03AX	139	31	25019	1958	0.879587	2.4099	1.59695	3.63671	2.8e-05	-1	N03AX Other antiepileptics	0.000137
p6m	H	N04BA	163	7	26632	345	0.708857	2.03167	0.925355	4.46063	0.0773	0	N04BA Dopa and dopa derivatives	0.169
p6m	H	N05AD	164	6	26933	44	2.49034	12.0653	4.58901	31.722	4.46e-07	-1	N05AD Butyrophenone derivatives [DG:DG01940]	6.17e-06
p6m	H	N05AX	162	8	26857	120	1.641	5.16031	2.29576	11.5991	7.17e-05	-1	N05AX Other antipsychotics	0.000313
p6m	H	N05BA	155	15	26444	533	1.44117	4.22565	2.39217	7.46441	6.92e-07	-1	N05BA Benzodiazepine derivatives [DG:DG01914]	7.18e-06
p6m	H	N05CD	145	25	26799	178	2.78927	16.2691	9.9219	26.6766	2.38e-28	-1	N05CD Benzodiazepine derivatives	1.98e-26
p6m	H	N06AA	159	11	25253	1724	0.0251834	1.0255	0.547736	1.92001	0.937	0	N06AA Non-selective monoamine reuptake inhibitors [DG:DG01730]	0.984
p6m	H	N06AB	150	20	24623	2354	0.359814	1.43306	0.866133	2.37108	0.161	0	N06AB Selective serotonin reuptake inhibitors	0.278
p6m	H	N06AX	155	15	25758	1219	0.478824	1.61418	0.913759	2.85148	0.0991	0	N06AX Other antidepressants	0.206
p6m	H	N06DA	160	10	26683	294	0.57903	1.78431	0.84175	3.7823	0.131	0	N06DA Anticholinesterases	0.253
p6m	H	N06DX	157	13	26791	186	1.52337	4.58768	2.38862	8.8113	4.78e-06	-1	N06DX Other anti-dementia drugs	3.97e-05
p6m	H	R01AD	164	6	25456	1521	-0.487667	0.614057	0.269035	1.40155	0.247	0	R01AD Corticosteroids	0.353
p6m	H	R03AC	149	21	24294	2683	0.394875	1.4842	0.856055	2.57325	0.16	0	R03AC Selective beta-2-adrenoreceptor agonists	0.278
p6m	H	R03AK	160	10	25334	1643	0.151806	1.16393	0.562543	2.40825	0.682	0	R03AK Adrenergics in combination with corticosteroids or other drugs, excl. anticholinergics	0.786
p6m	H	R03AL	164	6	26659	318	0.807494	2.24228	0.91562	5.49117	0.0772	0	R03AL Adrenergics in combination with anticholinergics incl. triple combinations with corticosteroids	0.169
p6m	H	R05CB	162	8	26481	496	0.68627	1.98629	0.907685	4.34661	0.0859	0	R05CB Mucolytics	0.183
p6m	H	R05DA	162	8	25940	1037	0.00200077	1.002	0.485943	2.06611	0.996	0	R05DA Opium alkaloids and derivatives	0.996
p6m	H	R06AE	154	16	26169	808	1.09584	2.99171	1.74991	5.11474	6.21e-05	-1	R06AE Piperazine derivatives	0.000286
p6m	H	R06AX	165	5	26174	803	0.066457	1.06872	0.431676	2.64585	0.886	0	R06AX Other antihistamines for systemic use	0.943
p6m	H	S01AA	160	10	26725	252	1.57874	4.84884	2.44729	9.60706	6.05e-06	-1	S01AA Antibiotics	4.56e-05
p6m	H	S01XA	159	11	25340	1637	-0.196438	0.821653	0.438124	1.54092	0.54	0	S01XA Other ophthalmologicals	0.631
p6m	H	V07AY	156	14	26198	779	0.751254	2.11966	1.1558	3.88731	0.0152	-1	V07AY Other non-therapeutic auxiliary products	0.036
p1yr	A	A01AB	1266	52	2466	74	0.108239	1.11431	0.75653	1.64131	0.584	0	A01AB Antiinfectives and antiseptics for local oral treatment	0.797
p1yr	A	A01AD	1301	17	2525	15	0.466786	1.59486	0.764268	3.32812	0.213	0	A01AD Other agents for local oral treatment	0.469
p1yr	A	A02BA	1262	56	2499	41	0.615797	1.85113	1.19628	2.86444	0.00571	-1	A02BA H2-receptor antagonists [DG:DG01481]	0.0391
p1yr	A	A02BC	862	456	1748	792	-0.284517	0.752378	0.640974	0.883144	0.000505	1	A02BC Proton pump inhibitors [DG:DG01646]	0.00532
p1yr	A	A02BX	1260	58	2455	85	-0.147706	0.862685	0.594308	1.25226	0.437	0	A02BX Other drugs for peptic ulcer and gastro-oesophageal reflux disease (GORD)	0.698
p1yr	A	A03AA	1299	19	2512	28	0.183064	1.20089	0.643869	2.2398	0.565	0	A03AA Synthetic anticholinergics, esters with tertiary amino group	0.797
p1yr	A	A03AX	1312	6	2527	13	-0.460535	0.630946	0.223951	1.77759	0.383	0	A03AX Other drugs for functional gastrointestinal disorders	0.653
p1yr	A	A03BB	1274	44	2507	33	0.69036	1.99443	1.22497	3.24723	0.00552	-1	A03BB Belladonna alkaloids, semisynthetic, quaternary ammonium compounds	0.0391
p1yr	A	A03FA	1289	29	2532	8	1.69877	5.46722	2.39412	12.485	5.61e-05	-1	A03FA Propulsives [DG:DG01763]	0.000825
p1yr	A	A06AA	1243	75	2510	30	1.05572	2.87403	1.83224	4.50817	4.41e-06	-1	A06AA Softeners, emollients	0.000128
p1yr	A	A06AB	1189	129	2476	64	0.803878	2.23419	1.60734	3.1055	1.76e-06	-1	A06AB Contact laxatives	6.3e-05
p1yr	A	A06AC	1309	9	2530	10	0.165248	1.17969	0.459899	3.02601	0.731	0	A06AC Bulk-forming laxatives	0.855
p1yr	A	A06AD	1101	217	2393	147	0.651426	1.91827	1.50863	2.43916	1.12e-07	-1	A06AD Osmotically acting laxatives	6.68e-06
p1yr	A	A06AG	1309	9	2532	8	0.401501	1.49407	0.538233	4.14734	0.441	0	A06AG Enemas	0.699
p1yr	A	A06AX	1309	9	2535	5	0.910927	2.48663	0.765787	8.07445	0.13	0	A06AX Other drugs for constipation	0.347
p1yr	A	A07AA	1284	34	2520	20	0.738102	2.09196	1.15857	3.77732	0.0144	-1	A07AA Antibiotics	0.0766
p1yr	A	A07DA	1274	44	2513	27	0.745169	2.1068	1.25865	3.52648	0.00459	-1	A07DA Antipropulsives	0.0357
p1yr	A	A07EC	1300	18	2520	20	0.297596	1.34662	0.67514	2.68593	0.398	0	A07EC Aminosalicylic acid and similar agents	0.66
p1yr	A	A08AB	1313	5	2535	5	0.608458	1.8376	0.510637	6.61284	0.352	0	A08AB Peripherally acting antiobesity products	0.636
p1yr	A	A09AB	1313	5	2534	6	-0.271575	0.762178	0.225094	2.58077	0.662	0	A09AB Acid preparations	0.817
p1yr	A	A10AB	1220	98	2470	70	0.250605	1.2848	0.865194	1.90792	0.214	0	A10AB Insulins and analogues for injection, fast-acting	0.469
p1yr	A	A10AC	1305	13	2533	7	0.194871	1.21515	0.442386	3.33781	0.705	0	A10AC Insulins and analogues for injection, intermediate-acting	0.844
p1yr	A	A10AD	1288	30	2528	12	0.40992	1.5067	0.722055	3.14399	0.275	0	A10AD Insulins and analogues for injection, intermediate- or long-acting combined with fast-acting	0.553
p1yr	A	A10AE	1292	26	2529	11	0.626036	1.87018	0.857681	4.07795	0.116	0	A10AE Insulins and analogues for injection, long-acting	0.324
p1yr	A	A10BA	1178	140	2367	173	-0.392065	0.67566	0.493903	0.924305	0.0142	1	A10BA Biguanides [DG:DG01684]	0.0766
p1yr	A	A10BB	1279	39	2482	58	-0.601594	0.547937	0.339418	0.884559	0.0138	1	A10BB Sulfonylureas	0.0766
p1yr	A	A10BD	1312	6	2535	5	0.235388	1.2654	0.36282	4.41331	0.712	0	A10BD Combinations of oral blood glucose lowering drugs	0.844
p1yr	A	A10BG	1313	5	2535	5	-0.334478	0.715711	0.19596	2.61401	0.613	0	A10BG Thiazolidinediones [DG:DG01683]	0.798
p1yr	A	A10BH	1276	42	2494	46	-0.358677	0.6986	0.429285	1.13687	0.149	0	A10BH Dipeptidyl peptidase 4 (DPP-4) inhibitors [DG:DG01601]	0.373
p1yr	A	A10BJ	1309	9	2521	19	-0.875057	0.416838	0.169444	1.02544	0.0567	0	A10BJ Glucagon-like peptide-1 receptor (GLP-1) analogues	0.196
p1yr	A	A10BK	1296	22	2505	35	-0.290549	0.747853	0.410636	1.362	0.342	0	A10BK Sodium-glucose co-transporter 2 (SGLT2) inhibitors	0.631
p1yr	A	A11CC	1243	75	2471	69	0.269866	1.30979	0.908593	1.88814	0.148	0	A11CC Vitamin D and analogues	0.373
p1yr	A	A11DA	1283	35	2534	6	1.89625	6.66084	2.71006	16.3711	3.64e-05	-1	A11DA Vitamin B1, plain	0.0007
p1yr	A	A12AA	1310	8	2530	10	-0.182917	0.832837	0.311331	2.22791	0.716	0	A12AA Calcium	0.844
p1yr	A	A12AX	1136	182	2362	178	0.300883	1.35105	1.06125	1.71999	0.0146	-1	A12AX Calcium, combinations with vitamin D and/or other drugs	0.0766
p1yr	A	B01AA	1279	39	2506	34	0.292134	1.33928	0.816539	2.19668	0.247	0	B01AA Vitamin K antagonists	0.502
p1yr	A	B01AB	1309	9	2534	6	0.649936	1.91542	0.656092	5.59194	0.234	0	B01AB Heparin group	0.492
p1yr	A	B01AC	1087	231	2275	265	-0.198013	0.82036	0.651381	1.03317	0.0924	0	B01AC Platelet aggregation inhibitors excl. heparin	0.275
p1yr	A	B01AF	1197	121	2435	105	0.348821	1.41739	1.05809	1.89872	0.0194	-1	B01AF Direct factor Xa inhibitors	0.0904
p1yr	A	B03AA	1219	99	2487	53	0.760335	2.13899	1.47593	3.09994	5.99e-05	-1	B03AA Iron bivalent, oral preparations	0.000825
p1yr	A	B03BA	1247	71	2464	76	0.115212	1.12211	0.783123	1.60784	0.53	0	B03BA Vitamin B12 (cyanocobalamin and analogues)	0.786
p1yr	A	B03BB	1223	95	2467	73	0.387074	1.47267	1.04973	2.066	0.025	-1	B03BB Folic acid and derivatives	0.109
p1yr	A	B05CB	1303	15	2530	10	0.425365	1.53015	0.667598	3.50713	0.315	0	B05CB Salt solutions	0.607
p1yr	A	C01AA	1302	16	2519	21	-0.370942	0.690084	0.344514	1.38228	0.295	0	C01AA Digitalis glycosides [DG:DG01697]	0.587
p1yr	A	C01DA	1224	94	2457	83	0.0449245	1.04595	0.728917	1.50087	0.807	0	C01DA Organic nitrates	0.899
p1yr	A	C01DX	1305	13	2535	5	0.46339	1.58945	0.536297	4.71075	0.403	0	C01DX Other vasodilators used in cardiac diseases	0.662
p1yr	A	C01EB	1308	10	2523	17	-0.833505	0.434524	0.185261	1.01916	0.0553	0	C01EB Other cardiac preparations	0.196
p1yr	A	C02CA	1272	46	2488	52	-0.145193	0.864855	0.559473	1.33693	0.513	0	C02CA Alpha-adrenoreceptor antagonists	0.778
p1yr	A	C03AA	1264	54	2462	78	-0.232239	0.792757	0.539035	1.1659	0.238	0	C03AA Thiazides, plain [DG:DG01749]	0.492
p1yr	A	C03BA	1275	43	2492	48	0.162379	1.17631	0.752981	1.83762	0.475	0	C03BA Sulfonamides, plain	0.739
p1yr	A	C03CA	1174	144	2462	78	0.596333	1.81545	1.32947	2.47908	0.000178	-1	C03CA Sulfonamides, plain	0.00228
p1yr	A	C03DA	1289	29	2515	25	0.163962	1.17817	0.657134	2.11233	0.582	0	C03DA Aldosterone antagonists	0.797
p1yr	A	C05AX	1295	23	2510	30	-0.00342597	0.99658	0.546914	1.81595	0.991	0	C05AX Other agents for treatment of hemorrhoids and anal fissures for topical use	0.991
p1yr	A	C07AA	1299	19	2510	30	0.400833	1.49307	0.801596	2.78102	0.206	0	C07AA Beta blocking agents, non-selective	0.469
p1yr	A	C07AB	1104	214	2302	238	0.00638674	1.00641	0.798727	1.26809	0.957	0	C07AB Beta blocking agents, selective	0.968
p1yr	A	C07AG	1310	8	2535	5	0.545666	1.72576	0.514705	5.7863	0.377	0	C07AG Alpha and beta blocking agents	0.649
p1yr	A	C08CA	1066	252	2159	381	-0.201843	0.817223	0.66947	0.997586	0.0473	1	C08CA Dihydropyridine derivatives [DG:DG01928]	0.176
p1yr	A	C08DB	1307	11	2520	20	-0.509478	0.600809	0.276871	1.30375	0.197	0	C08DB Benzothiazepine derivatives	0.464
p1yr	A	C09AA	1098	220	2172	368	-0.359345	0.698134	0.566434	0.860454	0.000759	1	C09AA ACE inhibitors, plain [DG:DG01501]	0.00755
p1yr	A	C09CA	1195	123	2338	202	-0.353606	0.702151	0.540145	0.912748	0.00825	1	C09CA Angiotensin II receptor blockers, plain [DG:DG01495]	0.0492
p1yr	A	C10AA	854	464	1746	794	-0.644929	0.5247	0.441042	0.624225	4.03e-13	1	C10AA HMG CoA reductase inhibitors [DG:DG01660]	7.21e-11
p1yr	A	C10AB	1308	10	2534	6	0.312645	1.36704	0.455581	4.10199	0.577	0	C10AB Fibrates	0.797
p1yr	A	C10AC	1312	6	2533	7	0.3018	1.35229	0.419226	4.36206	0.613	0	C10AC Bile acid sequestrants	0.798
p1yr	A	C10AX	1297	21	2516	24	-0.0730948	0.929513	0.494529	1.7471	0.82	0	C10AX Other lipid modifying agents	0.899
p1yr	A	D01AC	1213	105	2427	113	0.22293	1.24973	0.923558	1.6911	0.148	0	D01AC Imidazole and triazole derivatives	0.373
p1yr	A	D01AE	1299	19	2519	21	0.0530555	1.05449	0.531937	2.09037	0.879	0	D01AE Other antifungals for topical use	0.926
p1yr	A	D01BA	1306	12	2521	19	0.349295	1.41807	0.659294	3.0501	0.371	0	D01BA Antifungals for systemic use	0.649
p1yr	A	D02AC	1287	31	2503	37	0.00395088	1.00396	0.591716	1.70341	0.988	0	D02AC Soft paraffin and fat products	0.991
p1yr	A	D02AE	1306	12	2526	14	0.136202	1.14591	0.498481	2.63424	0.748	0	D02AE Carbamide products	0.869
p1yr	A	D02AX	1137	181	2366	174	0.248217	1.28174	1.00672	1.63188	0.044	-1	D02AX Other emollients and protectives	0.168
p1yr	A	D05AX	1301	17	2515	25	-0.0367451	0.963922	0.495508	1.87514	0.914	0	D05AX Other antipsoriatics for topical use	0.945
p1yr	A	D06AX	1295	23	2509	31	0.10869	1.11482	0.623213	1.99421	0.714	0	D06AX Other antibiotics for topical use	0.844
p1yr	A	D06BB	1313	5	2534	6	0.151837	1.16397	0.320811	4.22313	0.817	0	D06BB Antivirals	0.899
p1yr	A	D07AA	1281	37	2512	28	0.73128	2.07774	1.21744	3.54597	0.00734	-1	D07AA Corticosteroids, weak (group I)	0.0453
p1yr	A	D07AB	1284	34	2516	24	0.8707	2.38858	1.35723	4.20366	0.00254	-1	D07AB Corticosteroids, moderately potent (group II)	0.0227
p1yr	A	D07AC	1243	75	2451	89	0.209878	1.23353	0.879367	1.73032	0.224	0	D07AC Corticosteroids, potent (group III)	0.482
p1yr	A	D07AD	1293	25	2506	34	0.273914	1.3151	0.755543	2.28907	0.333	0	D07AD Corticosteroids, very potent (group IV)	0.621
p1yr	A	D07CA	1306	12	2528	12	0.446986	1.56359	0.648658	3.76905	0.319	0	D07CA Corticosteroids, weak, combinations with antibiotics	0.607
p1yr	A	D07CC	1284	34	2505	35	0.142702	1.15339	0.686394	1.9381	0.59	0	D07CC Corticosteroids, potent, combinations with antibiotics	0.797
p1yr	A	D07CD	1311	7	2529	11	-0.10575	0.899649	0.32106	2.52092	0.841	0	D07CD Corticosteroids, very potent, combinations with antibiotics	0.912
p1yr	A	D09AA	1304	14	2529	11	0.253931	1.28908	0.562084	2.95638	0.549	0	D09AA Medicated dressings with antiinfectives	0.797
p1yr	A	D11AC	1309	9	2523	17	-0.68769	0.502736	0.207174	1.21996	0.128	0	D11AC Medicated shampoos	0.347
p1yr	A	G01AF	1288	30	2522	18	0.895277	2.44801	1.2894	4.64773	0.00621	-1	G01AF Imidazole derivatives	0.0397
p1yr	A	G03BA	1311	7	2528	12	-0.653735	0.5201	0.190536	1.4197	0.202	0	G03BA 3-oxoandrosten (4) derivatives	0.469
p1yr	A	G03CA	1269	49	2410	130	0.0847533	1.08845	0.75614	1.5668	0.648	0	G03CA Natural and semisynthetic estrogens, plain	0.805
p1yr	A	G03FA	1313	5	2529	11	0.920762	2.5112	0.855814	7.36858	0.0936	0	G03FA Progestogens and estrogens, fixed combinations	0.275
p1yr	A	G03FB	1311	7	2519	21	0.55021	1.73362	0.711599	4.22349	0.226	0	G03FB Progestogens and estrogens, sequential preparations	0.482
p1yr	A	G04BD	1267	51	2462	78	-0.18206	0.833551	0.565189	1.22934	0.358	0	G04BD Urinary antispasmodics	0.641
p1yr	A	G04BE	1256	62	2453	87	0.0981133	1.10309	0.769255	1.58179	0.594	0	G04BE Drugs used in erectile dysfunction	0.797
p1yr	A	G04CA	1310	8	2531	9	0.0717816	1.07442	0.388588	2.9707	0.89	0	G04CA Alpha-adrenoreceptor antagonists	0.927
p1yr	A	G04CB	1280	38	2498	42	-0.236431	0.78944	0.49	1.27187	0.331	0	G04CB Testosterone-5-alpha reductase inhibitors	0.621
p1yr	A	H02AA	1310	8	2535	5	0.420142	1.52218	0.468407	4.94661	0.485	0	H02AA Mineralocorticoids	0.748
p1yr	A	H02AB	1140	178	2396	144	0.667439	1.94924	1.50719	2.52093	3.79e-07	-1	H02AB Glucocorticoids	1.7e-05
p1yr	A	H02BX	1307	11	2525	15	-0.0374055	0.963285	0.419246	2.2133	0.93	0	H02BX Corticosteroids for systemic use, combinations	0.951
p1yr	A	H03AA	1234	84	2353	187	-0.33171	0.717696	0.536526	0.960042	0.0255	1	H03AA Thyroid hormones	0.109
p1yr	A	J01AA	1159	159	2391	149	0.534757	1.70703	1.3217	2.20472	4.25e-05	-1	J01AA Tetracyclines [DG:DG01197]	0.0007
p1yr	A	J01CA	1064	254	2268	272	0.386893	1.4724	1.2017	1.80408	0.000191	-1	J01CA Penicillins with extended spectrum [DG:DG01780]	0.00228
p1yr	A	J01CE	1305	13	2518	22	0.205102	1.22765	0.585878	2.57242	0.587	0	J01CE Beta-lactamase sensitive penicillins [DG:DG01778]	0.797
p1yr	A	J01CF	1180	138	2409	131	0.459945	1.58399	1.2096	2.07426	0.000834	-1	J01CF Beta-lactamase resistant penicillins [DG:DG01779]	0.00786
p1yr	A	J01CR	1245	73	2500	40	0.905005	2.47194	1.62587	3.7583	2.34e-05	-1	J01CR Combinations of penicillins, incl. beta-lactamase inhibitors	0.000524
p1yr	A	J01DB	1295	23	2519	21	0.221236	1.24762	0.651383	2.38961	0.504	0	J01DB First-generation cephalosporins [DG:DG01774]	0.771
p1yr	A	J01EA	1275	43	2507	33	0.5853	1.79553	1.09872	2.93425	0.0195	-1	J01EA Trimethoprim and derivatives [DG:DG01581]	0.0904
p1yr	A	J01EE	1311	7	2534	6	0.451081	1.57001	0.505063	4.88043	0.436	0	J01EE Combinations of sulfonamides and trimethoprim, incl. derivatives	0.698
p1yr	A	J01FA	1235	83	2456	84	0.399997	1.49182	1.06602	2.08769	0.0197	-1	J01FA Macrolides [DG:DG01551]	0.0904
p1yr	A	J01FF	1308	10	2535	5	0.777879	2.17685	0.649396	7.29706	0.207	0	J01FF Lincosamides [DG:DG01578]	0.469
p1yr	A	J01MA	1296	22	2525	15	0.586273	1.79728	0.890664	3.62674	0.102	0	J01MA Fluoroquinolones [DG:DG01549]	0.294
p1yr	A	J01XE	1176	142	2365	175	0.261493	1.29887	1.00678	1.6757	0.0442	-1	J01XE Nitrofuran derivatives	0.168
p1yr	A	J02AC	1295	23	2520	20	0.809811	2.24748	1.16715	4.32779	0.0154	-1	J02AC Triazole derivatives	0.0766
p1yr	A	J05AB	1298	20	2510	30	0.307063	1.35943	0.744428	2.4825	0.318	0	J05AB Nucleosides and nucleotides excl. reverse transcriptase inhibitors [DG:DG02840]	0.607
p1yr	A	J07AL	1312	6	2528	12	-0.221604	0.801233	0.291763	2.20033	0.667	0	J07AL Pneumococcal vaccines	0.818
p1yr	A	J07BB	1211	107	2418	122	0.279017	1.32183	0.99176	1.76175	0.057	0	J07BB Influenza vaccines	0.196
p1yr	A	J07CA	1310	8	2521	19	-0.115264	0.891131	0.367175	2.16277	0.799	0	J07CA Bacterial and viral vaccines, combined	0.899
p1yr	A	L01BC	1310	8	2535	5	1.14034	3.12785	0.952087	10.2758	0.0602	0	L01BC Pyrimidine analogues	0.199
p1yr	A	L02AE	1304	14	2534	6	0.636692	1.89022	0.690225	5.17646	0.215	0	L02AE Gonadotropin releasing hormone analogues	0.469
p1yr	A	L02BG	1307	11	2512	28	-0.181914	0.833673	0.396237	1.75403	0.632	0	L02BG Aromatase inhibitors [DG:DG01596]	0.802
p1yr	A	L04AX	1302	16	2511	29	-0.164823	0.848044	0.438931	1.63848	0.624	0	L04AX Other immunosuppressants	0.798
p1yr	A	M01AB	1307	11	2526	14	0.361264	1.43514	0.622009	3.31126	0.397	0	M01AB Acetic acid derivatives and related substances	0.66
p1yr	A	M01AE	1232	86	2368	172	-0.03256	0.967964	0.727369	1.28814	0.823	0	M01AE Propionic acid derivatives	0.899
p1yr	A	M01AH	1309	9	2531	9	0.278333	1.32093	0.49373	3.53401	0.579	0	M01AH Coxibs	0.797
p1yr	A	M02AA	1174	144	2365	175	-0.0220351	0.978206	0.760121	1.25886	0.864	0	M02AA Antiinflammatory preparations, non-steroids for topical use	0.925
p1yr	A	M03BX	1304	14	2534	6	1.47645	4.37739	1.61721	11.8485	0.00367	-1	M03BX Other centrally acting agents	0.0299
p1yr	A	M04AA	1261	57	2466	74	-0.199349	0.819264	0.555003	1.20935	0.316	0	M04AA Preparations inhibiting uric acid production	0.607
p1yr	A	M04AC	1299	19	2516	24	-0.160353	0.851843	0.435023	1.66804	0.64	0	M04AC Preparations with no effect on uric acid metabolism	0.802
p1yr	A	M05BA	1245	73	2474	66	0.450961	1.56982	1.09175	2.25724	0.015	-1	M05BA Bisphosphonates [DG:DG01600]	0.0766
p1yr	A	N01BB	1287	31	2511	29	0.523854	1.68852	0.981417	2.90509	0.0585	0	N01BB Amides	0.198
p1yr	A	N01BX	1313	5	2535	5	-0.255082	0.774853	0.194592	3.08542	0.717	0	N01BX Other local anesthetics	0.844
p1yr	A	N02AA	1220	98	2497	43	1.04859	2.85363	1.94171	4.19384	9.86e-08	-1	N02AA Natural opium alkaloids	6.68e-06
p1yr	A	N02AE	1290	28	2520	20	0.195074	1.2154	0.66001	2.23815	0.531	0	N02AE Oripavine derivatives	0.786
p1yr	A	N02AJ	1178	140	2323	217	-0.0638824	0.938115	0.736534	1.19487	0.605	0	N02AJ Opioids in combination with non-opioid analgesics	0.798
p1yr	A	N02AX	1269	49	2484	56	-0.035749	0.964882	0.633565	1.46946	0.868	0	N02AX Other opioids	0.925
p1yr	A	N02BE	948	370	2093	447	0.0125138	1.01259	0.846633	1.21108	0.891	0	N02BE Anilides	0.927
p1yr	A	N02BG	1310	8	2533	7	0.500162	1.64899	0.562207	4.83659	0.362	0	N02BG Other analgesics and antipyretics	0.642
p1yr	A	N02CC	1306	12	2500	40	-0.160666	0.851576	0.433277	1.67372	0.641	0	N02CC Selective serotonin (5HT1) agonists [DG:DG01943]	0.802
p1yr	A	N03AB	1313	5	2535	5	0.497074	1.6439	0.447981	6.03245	0.454	0	N03AB Hydantoin derivatives	0.713
p1yr	A	N03AE	1313	5	2530	10	-0.798635	0.449943	0.138886	1.45766	0.183	0	N03AE Benzodiazepine derivatives	0.437
p1yr	A	N03AF	1307	11	2533	7	0.737926	2.09159	0.785688	5.56807	0.14	0	N03AF Carboxamide derivatives	0.369
p1yr	A	N03AG	1308	10	2527	13	-0.0272576	0.973111	0.388736	2.43596	0.954	0	N03AG Fatty acid derivatives	0.968
p1yr	A	N03AX	1163	155	2430	110	0.646473	1.9088	1.44653	2.51879	5.02e-06	-1	N03AX Other antiepileptics	0.000128
p1yr	A	N04BA	1294	24	2524	16	0.565804	1.76086	0.910821	3.40423	0.0925	0	N04BA Dopa and dopa derivatives	0.275
p1yr	A	N04BC	1302	16	2528	12	0.576015	1.77894	0.806901	3.92193	0.153	0	N04BC Dopamine agonists	0.375
p1yr	A	N05AB	1281	37	2512	28	0.821346	2.27356	1.32799	3.8924	0.00276	-1	N05AB Phenothiazines with piperazine structure	0.0235
p1yr	A	N05AH	1307	11	2522	18	-0.222641	0.800402	0.356324	1.79793	0.59	0	N05AH Diazepines, oxazepines and thiazepines	0.797
p1yr	A	N05AX	1295	23	2524	16	0.53971	1.71551	0.867364	3.39301	0.121	0	N05AX Other antipsychotics	0.333
p1yr	A	N05BA	1248	70	2472	68	0.522537	1.6863	1.16809	2.43442	0.00529	-1	N05BA Benzodiazepine derivatives [DG:DG01914]	0.0391
p1yr	A	N05CD	1281	37	2520	20	0.81547	2.26024	1.26503	4.03838	0.0059	-1	N05CD Benzodiazepine derivatives	0.0391
p1yr	A	N05CF	1275	43	2487	53	0.205609	1.22827	0.798164	1.89016	0.35	0	N05CF Benzodiazepine related drugs	0.636
p1yr	A	N06AA	1209	109	2393	147	0.0430224	1.04396	0.785322	1.38778	0.767	0	N06AA Non-selective monoamine reuptake inhibitors [DG:DG01730]	0.886
p1yr	A	N06AB	1178	140	2294	246	-0.0637968	0.938196	0.729972	1.20581	0.618	0	N06AB Selective serotonin reuptake inhibitors	0.798
p1yr	A	N06AX	1224	94	2440	100	0.304226	1.35557	0.986061	1.86356	0.061	0	N06AX Other antidepressants	0.199
p1yr	A	N06DA	1286	32	2503	37	-0.0743678	0.92833	0.556013	1.54996	0.776	0	N06DA Anticholinesterases	0.89
p1yr	A	N06DX	1285	33	2507	33	0.0414353	1.04231	0.610968	1.77816	0.879	0	N06DX Other anti-dementia drugs	0.926
p1yr	A	N07CA	1296	22	2506	34	-0.234601	0.790886	0.438961	1.42496	0.435	0	N07CA Antivertigo preparations	0.698
p1yr	A	P01AB	1301	17	2515	25	0.283509	1.32778	0.689958	2.55523	0.396	0	P01AB Nitroimidazole derivatives	0.66
p1yr	A	P01BA	1308	10	2529	11	0.249356	1.2832	0.50936	3.23268	0.597	0	P01BA Aminoquinolines	0.797
p1yr	A	P01BC	1287	31	2514	26	0.143234	1.154	0.651553	2.04391	0.623	0	P01BC Methanolquinolines	0.798
p1yr	A	R01AD	1220	98	2363	177	-0.203785	0.815638	0.615987	1.08	0.155	0	R01AD Corticosteroids	0.375
p1yr	A	R03AC	1110	208	2248	292	0.0126099	1.01269	0.793556	1.29234	0.919	0	R03AC Selective beta-2-adrenoreceptor agonists	0.945
p1yr	A	R03AK	1215	103	2386	154	-0.0919612	0.912141	0.66463	1.25182	0.569	0	R03AK Adrenergics in combination with corticosteroids or other drugs, excl. anticholinergics	0.797
p1yr	A	R03AL	1291	27	2524	16	0.591801	1.80724	0.923768	3.53565	0.0839	0	R03AL Adrenergics in combination with anticholinergics incl. triple combinations with corticosteroids	0.259
p1yr	A	R03BA	1278	40	2418	122	-0.767212	0.464306	0.308326	0.699196	0.000242	1	R03BA Glucocorticoids	0.00271
p1yr	A	R03BB	1273	45	2499	41	0.159824	1.1733	0.713654	1.92901	0.529	0	R03BB Anticholinergics	0.786
p1yr	A	R03DA	1313	5	2535	5	-0.246859	0.781251	0.205813	2.96557	0.717	0	R03DA Xanthines	0.844
p1yr	A	R03DC	1307	11	2514	26	-0.714115	0.489625	0.227674	1.05296	0.0676	0	R03DC Leukotriene receptor antagonists	0.216
p1yr	A	R05CB	1282	36	2519	21	0.529592	1.69824	0.944007	3.05508	0.0771	0	R05CB Mucolytics	0.242
p1yr	A	R05DA	1228	90	2440	100	0.336702	1.40032	1.02123	1.92014	0.0366	-1	R05DA Opium alkaloids and derivatives	0.149
p1yr	A	R06AB	1305	13	2534	6	1.01869	2.76956	1.00695	7.61748	0.0485	-1	R06AB Substituted alkylamines	0.177
p1yr	A	R06AD	1303	15	2533	7	1.05768	2.87969	1.08356	7.65307	0.0339	-1	R06AD Phenothiazine derivatives	0.141
p1yr	A	R06AE	1218	100	2470	70	0.706251	2.02638	1.44507	2.84154	4.3e-05	-1	R06AE Piperazine derivatives	0.0007
p1yr	A	R06AX	1266	52	2461	79	-0.049325	0.951872	0.645254	1.40419	0.804	0	R06AX Other antihistamines for systemic use	0.899
p1yr	A	S01AA	1281	37	2507	33	0.424538	1.52888	0.914041	2.55731	0.106	0	S01AA Antibiotics	0.301
p1yr	A	S01BA	1309	9	2533	7	0.651314	1.91806	0.648436	5.67357	0.239	0	S01BA Corticosteroids, plain	0.492
p1yr	A	S01EC	1307	11	2528	12	-0.0762837	0.926553	0.379464	2.2624	0.867	0	S01EC Carbonic anhydrase inhibitors	0.925
p1yr	A	S01ED	1308	10	2516	24	-0.910735	0.402228	0.182719	0.885444	0.0237	1	S01ED Beta blocking agents	0.106
p1yr	A	S01EE	1295	23	2494	46	-0.575316	0.562527	0.326754	0.968424	0.0379	1	S01EE Prostaglandin analogues	0.151
p1yr	A	S01GX	1305	13	2524	16	0.10659	1.11248	0.496341	2.49346	0.796	0	S01GX Other antiallergics	0.899
p1yr	A	S01XA	1236	82	2433	107	-0.092523	0.911628	0.657927	1.26316	0.578	0	S01XA Other ophthalmologicals	0.797
p1yr	A	S02AA	1310	8	2530	10	0.11465	1.12148	0.407447	3.08683	0.824	0	S02AA Antiinfectives	0.899
p1yr	A	S02CA	1313	5	2524	16	-0.776466	0.460029	0.159778	1.3245	0.15	0	S02CA Corticosteroids and antiinfectives in combination	0.373
p1yr	A	V07AY	1229	89	2453	87	0.15741	1.17048	0.826054	1.6585	0.376	0	V07AY Other non-therapeutic auxiliary products	0.649
p1yr	B	A01AB	164	6	3568	120	-0.129661	0.878393	0.365716	2.10976	0.772	0	A01AB Antiinfectives and antiseptics for local oral treatment	0.865
p1yr	B	A02BA	161	9	3600	88	0.443886	1.55875	0.738557	3.28981	0.244	0	A02BA H2-receptor antagonists [DG:DG01481]	0.413
p1yr	B	A02BC	104	66	2506	1182	-0.0833851	0.919997	0.652514	1.29713	0.634	0	A02BC Proton pump inhibitors [DG:DG01646]	0.766
p1yr	B	A02BX	159	11	3556	132	0.303843	1.35506	0.688359	2.66747	0.379	0	A02BX Other drugs for peptic ulcer and gastro-oesophageal reflux disease (GORD)	0.551
p1yr	B	A03BB	152	18	3629	59	1.53031	4.61962	2.47486	8.62305	1.59e-06	-1	A03BB Belladonna alkaloids, semisynthetic, quaternary ammonium compounds	4.93e-05
p1yr	B	A03FA	162	8	3659	29	1.53047	4.62035	1.87727	11.3716	0.000872	-1	A03FA Propulsives [DG:DG01763]	0.00978
p1yr	B	A06AA	158	12	3595	93	0.235764	1.26588	0.656784	2.43983	0.481	0	A06AA Softeners, emollients	0.63
p1yr	B	A06AB	134	36	3531	157	0.904738	2.47128	1.59512	3.82871	5.18e-05	-1	A06AB Contact laxatives	0.0012
p1yr	B	A06AD	121	49	3373	315	0.646966	1.90974	1.30293	2.79916	0.000917	-1	A06AD Osmotically acting laxatives	0.00978
p1yr	B	A07AA	163	7	3641	47	0.528653	1.69665	0.700687	4.10826	0.241	0	A07AA Antibiotics	0.413
p1yr	B	A07DA	161	9	3626	62	0.833953	2.3024	1.04245	5.0852	0.0391	-1	A07DA Antipropulsives	0.145
p1yr	B	A10AB	151	19	3539	149	0.722583	2.05975	1.04243	4.06988	0.0376	-1	A10AB Insulins and analogues for injection, fast-acting	0.145
p1yr	B	A10AD	164	6	3652	36	0.475393	1.60865	0.57816	4.47582	0.362	0	A10AD Insulins and analogues for injection, intermediate- or long-acting combined with fast-acting	0.543
p1yr	B	A10AE	163	7	3658	30	0.949712	2.58497	0.936036	7.13867	0.0669	0	A10AE Insulins and analogues for injection, long-acting	0.201
p1yr	B	A10BA	153	17	3392	296	-0.361309	0.696764	0.368806	1.31636	0.266	0	A10BA Biguanides [DG:DG01684]	0.434
p1yr	B	A10BB	163	7	3598	90	0.0966527	1.10148	0.450468	2.69332	0.832	0	A10BB Sulfonylureas	0.889
p1yr	B	A10BH	163	7	3607	81	-0.0213174	0.978908	0.404401	2.36958	0.962	0	A10BH Dipeptidyl peptidase 4 (DPP-4) inhibitors [DG:DG01601]	0.962
p1yr	B	A11CC	156	14	3558	130	0.289315	1.33551	0.709058	2.51544	0.37	0	A11CC Vitamin D and analogues	0.546
p1yr	B	A11DA	160	10	3657	31	1.1997	3.31913	1.47379	7.47505	0.00379	-1	A11DA Vitamin B1, plain	0.0273
p1yr	B	A12AX	138	32	3360	328	0.338529	1.40288	0.903369	2.1786	0.132	0	A12AX Calcium, combinations with vitamin D and/or other drugs	0.285
p1yr	B	B01AA	164	6	3621	67	0.0248734	1.02519	0.410567	2.55989	0.958	0	B01AA Vitamin K antagonists	0.962
p1yr	B	B01AC	131	39	3231	457	-0.167584	0.845706	0.552057	1.29555	0.441	0	B01AC Platelet aggregation inhibitors excl. heparin	0.61
p1yr	B	B01AF	144	26	3488	200	0.36118	1.43502	0.893271	2.30533	0.135	0	B01AF Direct factor Xa inhibitors	0.285
p1yr	B	B03AA	150	20	3556	132	0.671508	1.95719	1.12956	3.39123	0.0167	-1	B03AA Iron bivalent, oral preparations	0.0777
p1yr	B	B03BA	160	10	3551	137	-0.0545832	0.94688	0.472453	1.89771	0.878	0	B03BA Vitamin B12 (cyanocobalamin and analogues)	0.915
p1yr	B	B03BB	147	23	3543	145	0.659727	1.93426	1.15785	3.23131	0.0118	-1	B03BB Folic acid and derivatives	0.061
p1yr	B	B05CB	165	5	3668	20	0.725407	2.06557	0.709054	6.01729	0.184	0	B05CB Salt solutions	0.349
p1yr	B	C01AA	164	6	3657	31	0.406895	1.50215	0.587909	3.83808	0.395	0	C01AA Digitalis glycosides [DG:DG01697]	0.565
p1yr	B	C01DA	160	10	3521	167	-0.585643	0.556748	0.267692	1.15793	0.117	0	C01DA Organic nitrates	0.272
p1yr	B	C02CA	164	6	3596	92	-0.273127	0.760997	0.315204	1.83727	0.543	0	C02CA Alpha-adrenoreceptor antagonists	0.673
p1yr	B	C03AA	161	9	3565	123	-0.136089	0.872765	0.417734	1.82346	0.717	0	C03AA Thiazides, plain [DG:DG01749]	0.834
p1yr	B	C03BA	159	11	3608	80	0.628318	1.87446	0.926463	3.79247	0.0805	0	C03BA Sulfonamides, plain	0.214
p1yr	B	C03CA	140	30	3496	192	0.342013	1.40778	0.878889	2.25494	0.155	0	C03CA Sulfonamides, plain	0.32
p1yr	B	C07AB	129	41	3277	411	0.163171	1.17724	0.773559	1.79157	0.446	0	C07AB Beta blocking agents, selective	0.61
p1yr	B	C08CA	133	37	3092	596	-0.147057	0.863245	0.573886	1.2985	0.48	0	C08CA Dihydropyridine derivatives [DG:DG01928]	0.63
p1yr	B	C09AA	135	35	3135	553	-0.110208	0.895648	0.588354	1.36344	0.607	0	C09AA ACE inhibitors, plain [DG:DG01501]	0.743
p1yr	B	C09CA	148	22	3385	303	-0.0128362	0.987246	0.598517	1.62845	0.96	0	C09CA Angiotensin II receptor blockers, plain [DG:DG01495]	0.962
p1yr	B	C10AA	91	79	2509	1179	-0.139648	0.869664	0.616529	1.22673	0.426	0	C10AA HMG CoA reductase inhibitors [DG:DG01660]	0.6
p1yr	B	D01AC	148	22	3492	196	0.360412	1.43392	0.85244	2.41205	0.174	0	D01AC Imidazole and triazole derivatives	0.344
p1yr	B	D02AE	165	5	3667	21	1.51843	4.56504	1.47263	14.1512	0.00854	-1	D02AE Carbamide products	0.0567
p1yr	B	D02AX	130	40	3373	315	0.537869	1.71235	1.13761	2.57746	0.00995	-1	D02AX Other emollients and protectives	0.061
p1yr	B	D06AX	165	5	3639	49	0.812174	2.2528	0.830614	6.11006	0.111	0	D06AX Other antibiotics for topical use	0.272
p1yr	B	D07AA	163	7	3630	58	0.546456	1.72712	0.721087	4.13674	0.22	0	D07AA Corticosteroids, weak (group I)	0.393
p1yr	B	D07AC	157	13	3537	151	0.325638	1.38491	0.742424	2.58341	0.306	0	D07AC Corticosteroids, potent (group III)	0.473
p1yr	B	D07CC	161	9	3628	60	0.644644	1.90531	0.857112	4.23538	0.114	0	D07CC Corticosteroids, potent, combinations with antibiotics	0.272
p1yr	B	D09AA	165	5	3668	20	0.823089	2.27752	0.77505	6.69262	0.135	0	D09AA Medicated dressings with antiinfectives	0.285
p1yr	B	G04BD	161	9	3568	120	-0.130553	0.87761	0.421547	1.82708	0.727	0	G04BD Urinary antispasmodics	0.835
p1yr	B	G04BE	160	10	3549	139	0.381601	1.46463	0.717712	2.98885	0.294	0	G04BE Drugs used in erectile dysfunction	0.463
p1yr	B	G04CA	165	5	3676	12	1.5299	4.61771	1.38443	15.4022	0.0128	-1	G04CA Alpha-adrenoreceptor antagonists	0.0627
p1yr	B	G04CB	164	6	3614	74	-0.627643	0.533849	0.22006	1.29507	0.165	0	G04CB Testosterone-5-alpha reductase inhibitors	0.334
p1yr	B	H02AB	140	30	3396	292	0.691042	1.99579	1.25699	3.16883	0.0034	-1	H02AB Glucocorticoids	0.0273
p1yr	B	H03AA	150	20	3437	251	0.647662	1.91107	1.11828	3.2659	0.0179	-1	H03AA Thyroid hormones	0.0793
p1yr	B	J01AA	146	24	3404	284	0.43215	1.54057	0.950429	2.49713	0.0795	0	J01AA Tetracyclines [DG:DG01197]	0.214
p1yr	B	J01CA	128	42	3204	484	0.325559	1.3848	0.934463	2.05218	0.105	0	J01CA Penicillins with extended spectrum [DG:DG01780]	0.271
p1yr	B	J01CF	141	29	3448	240	0.509534	1.66451	1.05095	2.63628	0.0299	-1	J01CF Beta-lactamase resistant penicillins [DG:DG01779]	0.121
p1yr	B	J01CR	158	12	3587	101	0.385872	1.4709	0.753624	2.87084	0.258	0	J01CR Combinations of penicillins, incl. beta-lactamase inhibitors	0.428
p1yr	B	J01EA	160	10	3622	66	0.703785	2.02139	0.968423	4.21925	0.0609	0	J01EA Trimethoprim and derivatives [DG:DG01581]	0.201
p1yr	B	J01FA	156	14	3535	153	0.404273	1.49821	0.814111	2.75717	0.194	0	J01FA Macrolides [DG:DG01551]	0.354
p1yr	B	J01MA	164	6	3657	31	0.984113	2.67544	1.00447	7.12613	0.049	-1	J01MA Fluoroquinolones [DG:DG01549]	0.173
p1yr	B	J01XE	139	31	3402	286	0.5738	1.775	1.13959	2.76469	0.0112	-1	J01XE Nitrofuran derivatives	0.061
p1yr	B	J07BB	162	8	3467	221	-0.673101	0.510124	0.241502	1.07753	0.0777	0	J07BB Influenza vaccines	0.214
p1yr	B	M01AE	161	9	3439	249	-0.106445	0.899025	0.437935	1.84558	0.772	0	M01AE Propionic acid derivatives	0.865
p1yr	B	M02AA	144	26	3395	293	0.0883607	1.09238	0.687082	1.73676	0.709	0	M02AA Antiinflammatory preparations, non-steroids for topical use	0.834
p1yr	B	M04AA	161	9	3566	122	-0.105309	0.900046	0.423705	1.9119	0.784	0	M04AA Preparations inhibiting uric acid production	0.868
p1yr	B	M05BA	151	19	3568	120	0.97648	2.65509	1.51919	4.64032	0.000612	-1	M05BA Bisphosphonates [DG:DG01600]	0.00949
p1yr	B	N02AA	134	36	3583	105	1.63969	5.15359	3.25405	8.16198	3.19e-12	-1	N02AA Natural opium alkaloids	1.48e-10
p1yr	B	N02AE	159	11	3651	37	1.10788	3.02793	1.42992	6.41178	0.00381	-1	N02AE Oripavine derivatives	0.0273
p1yr	B	N02AJ	146	24	3355	333	0.247169	1.28039	0.794407	2.06369	0.31	0	N02AJ Opioids in combination with non-opioid analgesics	0.473
p1yr	B	N02AX	161	9	3592	96	0.457891	1.58074	0.739384	3.37947	0.237	0	N02AX Other opioids	0.413
p1yr	B	N02BE	89	81	2952	736	0.540973	1.71768	1.22153	2.41534	0.00187	-1	N02BE Anilides	0.0174
p1yr	B	N03AX	137	33	3456	232	0.848231	2.33551	1.4965	3.64492	0.000189	-1	N03AX Other antiepileptics	0.00352
p1yr	B	N04BA	163	7	3655	33	0.800652	2.22699	0.929006	5.3385	0.0727	0	N04BA Dopa and dopa derivatives	0.211
p1yr	B	N05AX	162	8	3657	31	0.837332	2.3102	0.944884	5.64832	0.0664	0	N05AX Other antipsychotics	0.201
p1yr	B	N05BA	150	20	3570	118	0.955713	2.60052	1.47607	4.58159	0.000946	-1	N05BA Benzodiazepine derivatives [DG:DG01914]	0.00978
p1yr	B	N05CD	145	25	3656	32	2.30533	10.0275	5.43579	18.498	1.91e-13	-1	N05CD Benzodiazepine derivatives	1.78e-11
p1yr	B	N05CF	165	5	3597	91	-0.126419	0.881245	0.340826	2.27856	0.794	0	N05CF Benzodiazepine related drugs	0.869
p1yr	B	N06AA	156	14	3446	242	0.128197	1.13678	0.620837	2.08148	0.678	0	N06AA Non-selective monoamine reuptake inhibitors [DG:DG01730]	0.808
p1yr	B	N06AB	149	21	3323	365	0.176548	1.19309	0.706222	2.01561	0.509	0	N06AB Selective serotonin reuptake inhibitors	0.648
p1yr	B	N06AX	153	17	3511	177	0.379638	1.46176	0.824722	2.59085	0.194	0	N06AX Other antidepressants	0.354
p1yr	B	N06DA	159	11	3630	58	0.396129	1.48606	0.724439	3.0484	0.28	0	N06DA Anticholinesterases	0.449
p1yr	B	N06DX	157	13	3635	53	0.569346	1.76711	0.874466	3.57096	0.113	0	N06DX Other anti-dementia drugs	0.272
p1yr	B	R01AD	163	7	3420	268	-0.750747	0.472014	0.212823	1.04686	0.0647	0	R01AD Corticosteroids	0.201
p1yr	B	R03AC	148	22	3210	478	-0.203984	0.815475	0.469189	1.41734	0.469	0	R03AC Selective beta-2-adrenoreceptor agonists	0.63
p1yr	B	R03AK	158	12	3443	245	0.0587194	1.06048	0.521657	2.15585	0.871	0	R03AK Adrenergics in combination with corticosteroids or other drugs, excl. anticholinergics	0.915
p1yr	B	R03AL	164	6	3651	37	0.669725	1.9537	0.736169	5.18488	0.179	0	R03AL Adrenergics in combination with anticholinergics incl. triple combinations with corticosteroids	0.347
p1yr	B	R03BB	163	7	3609	79	0.316326	1.37208	0.54705	3.44137	0.5	0	R03BB Anticholinergics	0.646
p1yr	B	R05CB	162	8	3639	49	0.851013	2.34202	0.998794	5.49167	0.0503	0	R05CB Mucolytics	0.173
p1yr	B	R05DA	158	12	3510	178	-0.0476763	0.953442	0.500819	1.81513	0.885	0	R05DA Opium alkaloids and derivatives	0.915
p1yr	B	R06AE	151	19	3537	151	0.715506	2.04522	1.17896	3.54799	0.0109	-1	R06AE Piperazine derivatives	0.061
p1yr	B	R06AX	163	7	3564	124	0.268707	1.30827	0.564883	3.02996	0.53	0	R06AX Other antihistamines for systemic use	0.666
p1yr	B	S01AA	159	11	3629	59	0.856861	2.35575	1.1252	4.93206	0.0231	-1	S01AA Antibiotics	0.0977
p1yr	B	S01XA	158	12	3511	177	-0.0734449	0.929187	0.483736	1.78484	0.825	0	S01XA Other ophthalmologicals	0.889
p1yr	B	V07AY	154	16	3528	160	0.481997	1.61931	0.860783	3.04624	0.135	0	V07AY Other non-therapeutic auxiliary products	0.285
p1yr	C	A01AB	1266	52	385401	7741	0.444636	1.55992	1.17686	2.06766	0.00198	-1	A01AB Antiinfectives and antiseptics for local oral treatment	0.00547
p1yr	C	A01AD	1301	17	391604	1538	0.752821	2.12298	1.30011	3.46667	0.00262	-1	A01AD Other agents for local oral treatment	0.00695
p1yr	C	A02BA	1262	56	386194	6948	0.424095	1.52821	1.15952	2.01413	0.00261	-1	A02BA H2-receptor antagonists [DG:DG01481]	0.00695
p1yr	C	A02BC	862	456	283814	109328	-0.125614	0.881955	0.779097	0.998393	0.0471	1	A02BC Proton pump inhibitors [DG:DG01646]	0.0884
p1yr	C	A02BX	1260	58	383722	9420	0.185963	1.20438	0.918391	1.57942	0.179	0	A02BX Other drugs for peptic ulcer and gastro-oesophageal reflux disease (GORD)	0.273
p1yr	C	A03AA	1299	19	388996	4146	0.0278174	1.02821	0.649037	1.62889	0.906	0	A03AA Synthetic anticholinergics, esters with tertiary amino group	0.925
p1yr	C	A03AX	1312	6	391432	1710	-0.33545	0.715016	0.318186	1.60676	0.417	0	A03AX Other drugs for functional gastrointestinal disorders	0.553
p1yr	C	A03BB	1274	44	390072	3070	1.071	2.91828	2.13874	3.98195	1.44e-11	-1	A03BB Belladonna alkaloids, semisynthetic, quaternary ammonium compounds	1.51e-10
p1yr	C	A03FA	1289	29	391336	1806	1.16664	3.21118	2.19643	4.69474	1.74e-09	-1	A03FA Propulsives [DG:DG01763]	1.33e-08
p1yr	C	A04AA	1312	6	392749	393	1.12351	3.07562	1.35744	6.96857	0.0071	-1	A04AA Serotonin (5HT3) antagonists	0.0168
p1yr	C	A06AA	1243	75	389191	3951	1.2052	3.33741	2.61032	4.26702	7.08e-22	-1	A06AA Softeners, emollients	2.01e-20
p1yr	C	A06AB	1189	129	387741	5401	1.35895	3.8921	3.19236	4.74522	3.64e-41	-1	A06AB Contact laxatives	7.24e-39
p1yr	C	A06AC	1309	9	390620	2522	-0.145403	0.864674	0.44695	1.67281	0.666	0	A06AC Bulk-forming laxatives	0.806
p1yr	C	A06AD	1101	217	375078	18064	1.02581	2.78936	2.39016	3.25524	9.94e-39	-1	A06AD Osmotically acting laxatives	9.89e-37
p1yr	C	A06AG	1309	9	392795	347	1.53842	4.65724	2.35479	9.21094	9.81e-06	-1	A06AG Enemas	4.65e-05
p1yr	C	A06AX	1309	9	392179	963	0.560343	1.75127	0.897429	3.41749	0.1	0	A06AX Other drugs for constipation	0.162
p1yr	C	A07AA	1284	34	390951	2191	1.14552	3.14406	2.20911	4.47471	2e-10	-1	A07AA Antibiotics	1.73e-09
p1yr	C	A07DA	1274	44	389087	4055	0.738338	2.09246	1.53425	2.85375	3.11e-06	-1	A07DA Antipropulsives	1.59e-05
p1yr	C	A07EC	1300	18	389491	3651	0.114441	1.12125	0.701258	1.79277	0.633	0	A07EC Aminosalicylic acid and similar agents	0.773
p1yr	C	A08AB	1313	5	392732	410	0.546286	1.72683	0.706857	4.21858	0.231	0	A08AB Peripherally acting antiobesity products	0.338
p1yr	C	A09AB	1313	5	392980	162	1.34093	3.82259	1.5393	9.49271	0.00386	-1	A09AB Acid preparations	0.00985
p1yr	C	A10AB	1220	98	383004	10138	0.147344	1.15875	0.899025	1.49352	0.255	0	A10AB Insulins and analogues for injection, fast-acting	0.367
p1yr	C	A10AC	1305	13	391989	1153	0.107647	1.11365	0.630093	1.96832	0.711	0	A10AC Insulins and analogues for injection, intermediate-acting	0.825
p1yr	C	A10AD	1288	30	391353	1789	0.434401	1.54404	1.04319	2.28535	0.0299	-1	A10AD Insulins and analogues for injection, intermediate- or long-acting combined with fast-acting	0.0601
p1yr	C	A10AE	1292	26	390087	3055	-0.0316787	0.968818	0.640237	1.46603	0.881	0	A10AE Insulins and analogues for injection, long-acting	0.913
p1yr	C	A10BA	1178	140	369828	23314	-0.392714	0.675222	0.541498	0.841969	0.000487	1	A10BA Biguanides [DG:DG01684]	0.0015
p1yr	C	A10BB	1279	39	386387	6755	-0.45811	0.632478	0.448909	0.891112	0.00882	1	A10BB Sulfonylureas	0.0204
p1yr	C	A10BD	1312	6	392761	381	0.484816	1.62388	0.703965	3.74589	0.256	0	A10BD Combinations of oral blood glucose lowering drugs	0.367
p1yr	C	A10BG	1313	5	392339	803	-0.237733	0.788413	0.323781	1.9198	0.601	0	A10BG Thiazolidinediones [DG:DG01683]	0.747
p1yr	C	A10BH	1276	42	387096	6046	-0.226708	0.797154	0.572496	1.10997	0.179	0	A10BH Dipeptidyl peptidase 4 (DPP-4) inhibitors [DG:DG01601]	0.273
p1yr	C	A10BJ	1309	9	391309	1833	-0.806349	0.446485	0.227777	0.875193	0.0189	1	A10BJ Glucagon-like peptide-1 receptor (GLP-1) analogues	0.04
p1yr	C	A10BK	1296	22	389384	3758	-0.343081	0.709581	0.456622	1.10267	0.127	0	A10BK Sodium-glucose co-transporter 2 (SGLT2) inhibitors	0.201
p1yr	C	A11CC	1243	75	384921	8221	0.530121	1.69914	1.33268	2.16637	1.89e-05	-1	A11CC Vitamin D and analogues	8.18e-05
p1yr	C	A11DA	1283	35	391551	1591	1.20918	3.35073	2.34615	4.78546	2.94e-11	-1	A11DA Vitamin B1, plain	2.93e-10
p1yr	C	A11EX	1309	9	392234	908	0.14702	1.15838	0.58847	2.28021	0.67	0	A11EX Vitamin B-complex, other combinations	0.806
p1yr	C	A12AA	1310	8	392405	737	0.78278	2.18754	1.07738	4.44165	0.0303	-1	A12AA Calcium	0.0601
p1yr	C	A12AX	1136	182	358488	34654	0.318119	1.37454	1.16455	1.6224	0.000169	-1	A12AX Calcium, combinations with vitamin D and/or other drugs	0.000623
p1yr	C	A12BA	1313	5	392823	319	1.0611	2.88953	1.17864	7.08393	0.0204	-1	A12BA Potassium	0.0425
p1yr	C	B01AA	1279	39	386684	6458	0.0513062	1.05265	0.759174	1.45956	0.758	0	B01AA Vitamin K antagonists	0.845
p1yr	C	B01AB	1309	9	392437	705	0.976652	2.65555	1.36087	5.18194	0.00419	-1	B01AB Heparin group	0.0106
p1yr	C	B01AC	1087	231	349128	44014	-0.229901	0.794612	0.671783	0.9399	0.00729	1	B01AC Platelet aggregation inhibitors excl. heparin	0.0171
p1yr	C	B01AF	1197	121	376098	17044	0.408976	1.50528	1.23836	1.82972	4.02e-05	-1	B01AF Direct factor Xa inhibitors	0.000163
p1yr	C	B03AA	1219	99	385045	8097	0.671775	1.95771	1.57232	2.43757	1.9e-09	-1	B03AA Iron bivalent, oral preparations	1.4e-08
p1yr	C	B03BA	1247	71	384889	8253	0.456855	1.5791	1.23198	2.02402	0.000309	-1	B03BA Vitamin B12 (cyanocobalamin and analogues)	0.0011
p1yr	C	B03BB	1223	95	384571	8571	0.764663	2.14827	1.72838	2.67017	5.54e-12	-1	B03BB Folic acid and derivatives	6.12e-11
p1yr	C	B05CB	1303	15	392623	519	1.58401	4.87448	2.88098	8.24738	3.56e-09	-1	B05CB Salt solutions	2.53e-08
p1yr	C	B05XA	1312	6	392688	454	0.268563	1.30808	0.565874	3.02379	0.53	0	B05XA Electrolyte solutions	0.676
p1yr	C	C01AA	1302	16	390817	2325	0.0686419	1.07105	0.648274	1.76955	0.789	0	C01AA Digitalis glycosides [DG:DG01697]	0.863
p1yr	C	C01CA	1311	7	392126	1016	0.706471	2.02683	0.958338	4.28662	0.0645	0	C01CA Adrenergic and dopaminergic agents	0.113
p1yr	C	C01DA	1224	94	382471	10671	0.137181	1.14704	0.899673	1.46241	0.268	0	C01DA Organic nitrates	0.378
p1yr	C	C01DX	1305	13	391581	1561	-0.318527	0.72722	0.412415	1.28232	0.271	0	C01DX Other vasodilators used in cardiac diseases	0.38
p1yr	C	C01EB	1308	10	391956	1186	-0.138365	0.870781	0.459224	1.65118	0.672	0	C01EB Other cardiac preparations	0.806
p1yr	C	C02AC	1313	5	392549	593	0.171205	1.18673	0.486934	2.89226	0.706	0	C02AC Imidazoline receptor agonists	0.825
p1yr	C	C02CA	1272	46	384232	8910	-0.256428	0.773811	0.571215	1.04826	0.0978	0	C02CA Alpha-adrenoreceptor antagonists	0.161
p1yr	C	C03AA	1264	54	377052	16090	-0.347612	0.706373	0.533716	0.934884	0.0151	1	C03AA Thiazides, plain [DG:DG01749]	0.0325
p1yr	C	C03BA	1275	43	384490	8652	0.0265026	1.02686	0.753555	1.39928	0.867	0	C03BA Sulfonamides, plain	0.904
p1yr	C	C03CA	1174	144	381915	11227	0.655419	1.92595	1.58581	2.33905	3.83e-11	-1	C03CA Sulfonamides, plain	3.63e-10
p1yr	C	C03DA	1289	29	389430	3712	0.0473236	1.04846	0.716229	1.5348	0.808	0	C03DA Aldosterone antagonists	0.874
p1yr	C	C05AX	1295	23	389099	4043	0.237829	1.26849	0.835807	1.92517	0.264	0	C05AX Other agents for treatment of hemorrhoids and anal fissures for topical use	0.375
p1yr	C	C07AA	1299	19	388281	4861	0.0709963	1.07358	0.680385	1.69399	0.76	0	C07AA Beta blocking agents, non-selective	0.845
p1yr	C	C07AB	1104	214	350509	42633	-0.185582	0.830621	0.702121	0.982637	0.0305	1	C07AB Beta blocking agents, selective	0.0601
p1yr	C	C07AG	1310	8	392574	568	0.676571	1.96712	0.96655	4.00348	0.062	0	C07AG Alpha and beta blocking agents	0.11
p1yr	C	C08CA	1066	252	327494	65648	-0.264797	0.767362	0.662	0.889493	0.000441	1	C08CA Dihydropyridine derivatives [DG:DG01928]	0.00142
p1yr	C	C08DB	1307	11	389438	3704	-0.836096	0.433399	0.237665	0.790336	0.00638	1	C08DB Benzothiazepine derivatives	0.0155
p1yr	C	C09AA	1098	220	331703	61439	-0.465384	0.627894	0.537479	0.733519	4.45e-09	1	C09AA ACE inhibitors, plain [DG:DG01501]	2.95e-08
p1yr	C	C09CA	1195	123	358901	34241	-0.428992	0.651165	0.536374	0.790523	1.45e-05	1	C09CA Angiotensin II receptor blockers, plain [DG:DG01495]	6.41e-05
p1yr	C	C10AA	854	464	255620	137522	-0.746139	0.474194	0.415933	0.540615	6.79e-29	1	C10AA HMG CoA reductase inhibitors [DG:DG01660]	3.38e-27
p1yr	C	C10AB	1308	10	391471	1671	-0.114975	0.891388	0.473831	1.67691	0.721	0	C10AB Fibrates	0.825
p1yr	C	C10AC	1312	6	392386	756	0.591774	1.80719	0.803824	4.06301	0.152	0	C10AC Bile acid sequestrants	0.236
p1yr	C	C10AX	1297	21	388838	4304	-0.204437	0.815106	0.525652	1.26395	0.361	0	C10AX Other lipid modifying agents	0.485
p1yr	C	D01AC	1213	105	380909	12233	0.615767	1.85108	1.50795	2.27227	3.94e-09	-1	D01AC Imidazole and triazole derivatives	2.7e-08
p1yr	C	D01AE	1299	19	390817	2325	0.612565	1.84516	1.16566	2.92077	0.00895	-1	D01AE Other antifungals for topical use	0.0205
p1yr	C	D01BA	1306	12	391754	1388	0.887715	2.42957	1.36668	4.31908	0.00249	-1	D01BA Antifungals for systemic use	0.00679
p1yr	C	D02AC	1287	31	386841	6301	0.00835292	1.00839	0.701654	1.44921	0.964	0	D02AC Soft paraffin and fat products	0.964
p1yr	C	D02AE	1306	12	391360	1782	0.22512	1.25247	0.704176	2.2277	0.444	0	D02AE Carbamide products	0.581
p1yr	C	D02AX	1137	181	371138	22004	0.552048	1.73681	1.47324	2.04752	4.9e-11	-1	D02AX Other emollients and protectives	4.43e-10
p1yr	C	D05AX	1301	17	389483	3659	0.0795691	1.08282	0.668089	1.75501	0.747	0	D05AX Other antipsoriatics for topical use	0.84
p1yr	C	D06AX	1295	23	390094	3048	0.455519	1.57699	1.03186	2.41011	0.0353	-1	D06AX Other antibiotics for topical use	0.0675
p1yr	C	D06BA	1313	5	393046	96	2.24449	9.4356	3.71754	23.9488	2.33e-06	-1	D06BA Sulfonamides	1.22e-05
p1yr	C	D06BB	1313	5	392392	750	0.488729	1.63024	0.672209	3.95367	0.28	0	D06BB Antivirals	0.39
p1yr	C	D07AA	1281	37	388016	5126	0.589932	1.80387	1.29377	2.51507	0.000504	-1	D07AA Corticosteroids, weak (group I)	0.00152
p1yr	C	D07AB	1284	34	388587	4555	0.632693	1.88267	1.33325	2.65851	0.000326	-1	D07AB Corticosteroids, moderately potent (group II)	0.00114
p1yr	C	D07AC	1243	75	379641	13501	0.305486	1.35728	1.0714	1.71946	0.0114	-1	D07AC Corticosteroids, potent (group III)	0.0249
p1yr	C	D07AD	1293	25	388579	4563	0.394746	1.48401	0.995382	2.2125	0.0527	0	D07AD Corticosteroids, very potent (group IV)	0.098
p1yr	C	D07BC	1313	5	392459	683	0.431048	1.53887	0.630118	3.75822	0.344	0	D07BC Corticosteroids, potent, combinations with antiseptics	0.466
p1yr	C	D07CA	1306	12	391362	1780	0.497302	1.64428	0.923324	2.92817	0.0912	0	D07CA Corticosteroids, weak, combinations with antibiotics	0.153
p1yr	C	D07CC	1284	34	389723	3419	0.773172	2.16663	1.52973	3.0687	1.34e-05	-1	D07CC Corticosteroids, potent, combinations with antibiotics	6.06e-05
p1yr	C	D07CD	1311	7	392226	916	0.461086	1.5858	0.747845	3.36266	0.229	0	D07CD Corticosteroids, very potent, combinations with antibiotics	0.338
p1yr	C	D09AA	1304	14	392555	587	1.42498	4.15779	2.41539	7.15713	2.72e-07	-1	D09AA Medicated dressings with antiinfectives	1.59e-06
p1yr	C	D11AC	1309	9	391693	1449	0.174535	1.19069	0.613987	2.30908	0.606	0	D11AC Medicated shampoos	0.749
p1yr	C	G01AF	1288	30	390877	2265	1.0621	2.89245	1.98888	4.20651	2.73e-08	-1	G01AF Imidazole derivatives	1.7e-07
p1yr	C	G03BA	1311	7	391967	1175	-0.0786146	0.924396	0.432932	1.97377	0.839	0	G03BA 3-oxoandrosten (4) derivatives	0.891
p1yr	C	G03CA	1269	49	371957	21185	-0.0555239	0.945989	0.704437	1.27037	0.712	0	G03CA Natural and semisynthetic estrogens, plain	0.825
p1yr	C	G03FA	1313	5	392132	1010	0.870751	2.3887	0.984517	5.79564	0.0542	0	G03FA Progestogens and estrogens, fixed combinations	0.0999
p1yr	C	G03FB	1311	7	391500	1642	0.716738	2.04774	0.966027	4.34071	0.0615	0	G03FB Progestogens and estrogens, sequential preparations	0.11
p1yr	C	G04BD	1267	51	382123	11019	-0.0806605	0.922507	0.693745	1.2267	0.579	0	G04BD Urinary antispasmodics	0.729
p1yr	C	G04BE	1256	62	380209	12933	-0.0269114	0.973447	0.748274	1.26638	0.841	0	G04BE Drugs used in erectile dysfunction	0.891
p1yr	C	G04CA	1310	8	391718	1424	-0.0211761	0.979047	0.48415	1.97983	0.953	0	G04CA Alpha-adrenoreceptor antagonists	0.958
p1yr	C	G04CB	1280	38	384405	8737	-0.226769	0.797105	0.572384	1.11005	0.18	0	G04CB Testosterone-5-alpha reductase inhibitors	0.273
p1yr	C	H02AA	1310	8	392620	522	1.08134	2.94864	1.44652	6.01059	0.00292	-1	H02AA Mineralocorticoids	0.00765
p1yr	C	H02AB	1140	178	372897	20245	0.723933	2.06253	1.73607	2.45037	1.81e-16	-1	H02AB Glucocorticoids	2.77e-15
p1yr	C	H02BX	1307	11	391287	1855	0.358938	1.43181	0.786533	2.60647	0.24	0	H02BX Corticosteroids for systemic use, combinations	0.349
p1yr	C	H03AA	1234	84	359009	34133	-0.491173	0.611908	0.487604	0.767902	2.24e-05	1	H03AA Thyroid hormones	9.48e-05
p1yr	C	J01AA	1159	159	376970	16172	0.826865	2.28614	1.91752	2.72562	3.07e-20	-1	J01AA Tetracyclines [DG:DG01197]	5.55e-19
p1yr	C	J01CA	1064	254	366276	26866	0.907473	2.47805	2.1481	2.85868	1.46e-35	-1	J01CA Penicillins with extended spectrum [DG:DG01780]	9.68e-34
p1yr	C	J01CE	1305	13	390434	2708	0.188106	1.20696	0.695817	2.09359	0.503	0	J01CE Beta-lactamase sensitive penicillins [DG:DG01778]	0.65
p1yr	C	J01CF	1180	138	380509	12633	0.986575	2.68203	2.23725	3.21524	1.52e-26	-1	J01CF Beta-lactamase resistant penicillins [DG:DG01779]	6.05e-25
p1yr	C	J01CR	1245	73	388192	4950	1.20949	3.35177	2.62661	4.27713	2.41e-22	-1	J01CR Combinations of penicillins, incl. beta-lactamase inhibitors	7.99e-21
p1yr	C	J01DB	1295	23	390749	2393	0.716804	2.04788	1.34486	3.11839	0.000835	-1	J01DB First-generation cephalosporins [DG:DG01774]	0.00241
p1yr	C	J01EA	1275	43	388287	4855	0.695183	2.00408	1.46745	2.73695	1.23e-05	-1	J01EA Trimethoprim and derivatives [DG:DG01581]	5.69e-05
p1yr	C	J01EE	1311	7	392714	428	1.10413	3.01659	1.41101	6.44918	0.0044	-1	J01EE Combinations of sulfonamides and trimethoprim, incl. derivatives	0.0109
p1yr	C	J01FA	1235	83	384061	9081	0.725201	2.06515	1.6399	2.60067	7.07e-10	-1	J01FA Macrolides [DG:DG01551]	5.63e-09
p1yr	C	J01FF	1308	10	392803	339	1.68906	5.4144	2.8162	10.4097	4.1e-07	-1	J01FF Lincosamides [DG:DG01578]	2.33e-06
p1yr	C	J01MA	1296	22	390677	2465	0.556972	1.74538	1.13579	2.68213	0.0111	-1	J01MA Fluoroquinolones [DG:DG01549]	0.0245
p1yr	C	J01XE	1176	142	374700	18442	0.803239	2.23276	1.8641	2.67433	2.69e-18	-1	J01XE Nitrofuran derivatives	4.46e-17
p1yr	C	J01XX	1312	6	392416	726	0.551279	1.73547	0.769498	3.91406	0.184	0	J01XX Other antibacterials	0.277
p1yr	C	J02AC	1295	23	391058	2084	0.984323	2.676	1.75623	4.07748	4.63e-06	-1	J02AC Triazole derivatives	2.25e-05
p1yr	C	J05AB	1298	20	389680	3462	0.551565	1.73597	1.11199	2.71009	0.0152	-1	J05AB Nucleosides and nucleotides excl. reverse transcriptase inhibitors [DG:DG02840]	0.0325
p1yr	C	J07AL	1312	6	391126	2016	-0.0817348	0.921516	0.412038	2.06096	0.842	0	J07AL Pneumococcal vaccines	0.891
p1yr	C	J07BB	1211	107	381898	11244	0.950032	2.58579	2.11594	3.15998	1.62e-20	-1	J07BB Influenza vaccines	3.58e-19
p1yr	C	J07CA	1310	8	390013	3129	-0.119091	0.887727	0.442072	1.78265	0.738	0	J07CA Bacterial and viral vaccines, combined	0.834
p1yr	C	L01BC	1310	8	390735	2407	0.0593074	1.0611	0.527494	2.1345	0.868	0	L01BC Pyrimidine analogues	0.904
p1yr	C	L02AE	1304	14	391341	1801	0.495803	1.64182	0.959048	2.81066	0.0707	0	L02AE Gonadotropin releasing hormone analogues	0.121
p1yr	C	L02BG	1307	11	389273	3869	-0.0282473	0.972148	0.533901	1.77013	0.926	0	L02BG Aromatase inhibitors [DG:DG01596]	0.94
p1yr	C	L04AA	1311	7	392453	689	0.718993	2.05237	0.963718	4.37079	0.0623	0	L04AA Selective immunosuppressants	0.11
p1yr	C	L04AX	1302	16	388814	4328	-0.121051	0.885989	0.539067	1.45617	0.633	0	L04AX Other immunosuppressants	0.773
p1yr	C	M01AB	1307	11	391485	1657	0.510409	1.66597	0.915556	3.03145	0.0947	0	M01AB Acetic acid derivatives and related substances	0.157
p1yr	C	M01AE	1232	86	372778	20364	0.169289	1.18446	0.949824	1.47707	0.133	0	M01AE Propionic acid derivatives	0.208
p1yr	C	M01AH	1309	9	391829	1313	0.531719	1.70186	0.878666	3.29626	0.115	0	M01AH Coxibs	0.183
p1yr	C	M02AA	1174	144	373860	19282	0.434219	1.54376	1.2892	1.84857	2.33e-06	-1	M02AA Antiinflammatory preparations, non-steroids for topical use	1.22e-05
p1yr	C	M03BA	1313	5	392985	157	1.67847	5.35735	2.11495	13.5706	0.000401	-1	M03BA Carbamic acid esters	0.00131
p1yr	C	M03BX	1304	14	392115	1027	0.912741	2.49114	1.45002	4.27978	0.000947	-1	M03BX Other centrally acting agents	0.00269
p1yr	C	M04AA	1261	57	382946	10196	-0.115015	0.891353	0.676126	1.17509	0.415	0	M04AA Preparations inhibiting uric acid production	0.553
p1yr	C	M04AC	1299	19	390923	2219	0.399556	1.49116	0.937352	2.37218	0.0916	0	M04AC Preparations with no effect on uric acid metabolism	0.153
p1yr	C	M05BA	1245	73	379446	13696	0.487047	1.6275	1.27536	2.07688	9.04e-05	-1	M05BA Bisphosphonates [DG:DG01600]	0.000353
p1yr	C	N01BB	1287	31	389255	3887	0.642675	1.90156	1.32483	2.72935	0.000491	-1	N01BB Amides	0.0015
p1yr	C	N01BX	1313	5	392299	843	0.130496	1.13939	0.469948	2.76247	0.773	0	N01BX Other local anesthetics	0.85
p1yr	C	N02AA	1220	98	387416	5726	1.07588	2.93258	2.34729	3.66382	2.76e-21	-1	N02AA Natural opium alkaloids	6.87e-20
p1yr	C	N02AB	1305	13	392557	585	0.998995	2.71555	1.53616	4.80042	0.000589	-1	N02AB Phenylpiperidine derivatives	0.00175
p1yr	C	N02AE	1290	28	391173	1969	0.709171	2.03231	1.3768	2.99991	0.000358	-1	N02AE Oripavine derivatives	0.00119
p1yr	C	N02AJ	1178	140	369619	23523	0.194704	1.21495	1.01374	1.45609	0.035	-1	N02AJ Opioids in combination with non-opioid analgesics	0.0675
p1yr	C	N02AX	1269	49	386054	7088	0.109448	1.11566	0.830076	1.4995	0.468	0	N02AX Other opioids	0.609
p1yr	C	N02BE	948	370	343710	49432	0.483312	1.62144	1.41817	1.85383	1.53e-12	-1	N02BE Anilides	1.79e-11
p1yr	C	N02BG	1310	8	392568	574	0.924664	2.52102	1.24029	5.12422	0.0106	-1	N02BG Other analgesics and antipyretics	0.0237
p1yr	C	N02CC	1306	12	388010	5132	-0.194263	0.823441	0.464109	1.46098	0.507	0	N02CC Selective serotonin (5HT1) agonists [DG:DG01943]	0.651
p1yr	C	N03AB	1313	5	392648	494	0.748929	2.11473	0.865916	5.16459	0.1	0	N03AB Hydantoin derivatives	0.162
p1yr	C	N03AE	1313	5	392419	723	0.137563	1.14747	0.468078	2.81299	0.764	0	N03AE Benzodiazepine derivatives	0.845
p1yr	C	N03AF	1307	11	391462	1680	0.297759	1.34684	0.736985	2.46134	0.333	0	N03AF Carboxamide derivatives	0.454
p1yr	C	N03AG	1308	10	391816	1326	0.118149	1.12541	0.589998	2.14671	0.72	0	N03AG Fatty acid derivatives	0.825
p1yr	C	N03AX	1163	155	376275	16867	0.573633	1.7747	1.48314	2.12359	3.75e-10	-1	N03AX Other antiepileptics	3.11e-09
p1yr	C	N04BA	1294	24	390648	2494	0.789206	2.20165	1.45656	3.32789	0.000181	-1	N04BA Dopa and dopa derivatives	0.000655
p1yr	C	N04BB	1313	5	392894	248	1.71823	5.57467	2.2799	13.6309	0.000166	-1	N04BB Adamantane derivatives	0.000623
p1yr	C	N04BC	1302	16	391402	1740	0.694359	2.00242	1.21	3.3138	0.0069	-1	N04BC Dopamine agonists	0.0165
p1yr	C	N04BD	1311	7	392557	585	1.20114	3.3239	1.56051	7.07995	0.00185	-1	N04BD Monoamine oxidase B inhibitors	0.00519
p1yr	C	N05AB	1281	37	388165	4977	0.609521	1.83955	1.31875	2.56603	0.000332	-1	N05AB Phenothiazines with piperazine structure	0.00114
p1yr	C	N05AD	1310	8	392921	221	1.71484	5.5558	2.66992	11.561	4.51e-06	-1	N05AD Butyrophenone derivatives [DG:DG01940]	2.24e-05
p1yr	C	N05AH	1307	11	391546	1596	0.104684	1.11036	0.604083	2.04094	0.736	0	N05AH Diazepines, oxazepines and thiazepines	0.834
p1yr	C	N05AX	1295	23	392299	843	1.23535	3.43957	2.20232	5.37188	5.61e-08	-1	N05AX Other antipsychotics	3.38e-07
p1yr	C	N05BA	1248	70	387526	5616	1.03641	2.81908	2.19377	3.62262	5.52e-16	-1	N05BA Benzodiazepine derivatives [DG:DG01914]	7.85e-15
p1yr	C	N05CD	1281	37	391787	1355	1.63115	5.10976	3.61863	7.21534	1.96e-20	-1	N05CD Benzodiazepine derivatives	3.9e-19
p1yr	C	N05CF	1275	43	386905	6237	0.445705	1.56159	1.14447	2.13073	0.00494	-1	N05CF Benzodiazepine related drugs	0.0121
p1yr	C	N05CH	1309	9	392576	566	1.02094	2.77581	1.41175	5.45784	0.00308	-1	N05CH Melatonin receptor agonists	0.00796
p1yr	C	N06AA	1209	109	371462	21680	0.12784	1.13637	0.927527	1.39224	0.217	0	N06AA Non-selective monoamine reuptake inhibitors [DG:DG01730]	0.322
p1yr	C	N06AB	1178	140	363943	29199	0.0758053	1.07875	0.889431	1.30837	0.441	0	N06AB Selective serotonin reuptake inhibitors	0.581
p1yr	C	N06AX	1224	94	381788	11354	0.405958	1.50074	1.19566	1.88366	0.000463	-1	N06AX Other antidepressants	0.00146
p1yr	C	N06DA	1286	32	391006	2136	0.813512	2.25582	1.51204	3.36547	6.73e-05	-1	N06DA Anticholinesterases	0.000268
p1yr	C	N06DX	1285	33	392134	1008	1.61334	5.01954	3.36716	7.48281	2.39e-15	-1	N06DX Other anti-dementia drugs	3.17e-14
p1yr	C	N07CA	1296	22	389008	4134	0.0801359	1.08343	0.706744	1.6609	0.713	0	N07CA Antivertigo preparations	0.825
p1yr	C	P01AB	1301	17	391444	1698	0.892823	2.44201	1.49893	3.97847	0.000337	-1	P01AB Nitroimidazole derivatives	0.00114
p1yr	C	P01BA	1308	10	391238	1904	0.197488	1.21834	0.649995	2.28363	0.538	0	P01BA Aminoquinolines	0.682
p1yr	C	P01BC	1287	31	388653	4489	0.0770449	1.08009	0.748735	1.55809	0.68	0	P01BC Methanolquinolines	0.809
p1yr	C	P03AC	1313	5	392826	316	1.07882	2.9412	1.1812	7.32362	0.0205	-1	P03AC Pyrethrines, incl. synthetic compounds	0.0425
p1yr	C	R01AD	1220	98	367822	25320	-0.056198	0.945352	0.766371	1.16613	0.6	0	R01AD Corticosteroids	0.747
p1yr	C	R01AX	1313	5	392641	501	0.869702	2.3862	0.981329	5.80229	0.0551	0	R01AX Other nasal preparations	0.1
p1yr	C	R03AC	1110	208	354667	38475	0.174569	1.19073	0.988074	1.43496	0.0667	0	R03AC Selective beta-2-adrenoreceptor agonists	0.115
p1yr	C	R03AK	1215	103	372482	20660	-0.0302274	0.970225	0.767368	1.22671	0.801	0	R03AK Adrenergics in combination with corticosteroids or other drugs, excl. anticholinergics	0.871
p1yr	C	R03AL	1291	27	390049	3093	0.2737	1.31482	0.875196	1.97527	0.188	0	R03AL Adrenergics in combination with anticholinergics incl. triple combinations with corticosteroids	0.281
p1yr	C	R03BA	1278	40	378273	14869	-0.379281	0.684353	0.492778	0.950406	0.0236	1	R03BA Glucocorticoids	0.0484
p1yr	C	R03BB	1273	45	386934	6208	0.0686271	1.07104	0.770694	1.48842	0.683	0	R03BB Anticholinergics	0.809
p1yr	C	R03DA	1313	5	392614	528	0.0316642	1.03217	0.418109	2.54808	0.945	0	R03DA Xanthines	0.955
p1yr	C	R03DC	1307	11	389572	3570	-0.625773	0.534848	0.291488	0.981386	0.0433	1	R03DC Leukotriene receptor antagonists	0.0821
p1yr	C	R05CB	1282	36	389370	3772	0.347959	1.41617	0.991868	2.022	0.0555	0	R05CB Mucolytics	0.1
p1yr	C	R05DA	1228	90	381378	11764	0.539419	1.71501	1.37772	2.13488	1.38e-06	-1	R05DA Opium alkaloids and derivatives	7.63e-06
p1yr	C	R06AB	1305	13	392038	1104	0.741191	2.09843	1.19875	3.67336	0.00947	-1	R06AB Substituted alkylamines	0.0214
p1yr	C	R06AD	1303	15	391969	1173	0.893639	2.44401	1.4555	4.10387	0.000727	-1	R06AD Phenothiazine derivatives	0.00213
p1yr	C	R06AE	1218	100	383627	9515	0.796067	2.21681	1.79277	2.74113	2e-13	-1	R06AE Piperazine derivatives	2.49e-12
p1yr	C	R06AX	1266	52	381954	11188	0.0291848	1.02961	0.775201	1.36752	0.84	0	R06AX Other antihistamines for systemic use	0.891
p1yr	C	S01AA	1281	37	388835	4307	0.71499	2.04417	1.46644	2.84951	2.46e-05	-1	S01AA Antibiotics	0.000102
p1yr	C	S01BA	1309	9	391295	1847	0.0455291	1.04658	0.540253	2.02744	0.893	0	S01BA Corticosteroids, plain	0.921
p1yr	C	S01EC	1307	11	389719	3423	-0.317189	0.728193	0.400723	1.32327	0.298	0	S01EC Carbonic anhydrase inhibitors	0.412
p1yr	C	S01ED	1308	10	388022	5120	-0.703274	0.494962	0.264942	0.924685	0.0274	1	S01ED Beta blocking agents	0.0556
p1yr	C	S01EE	1295	23	384759	8383	-0.452325	0.636148	0.419819	0.963948	0.0329	1	S01EE Prostaglandin analogues	0.0642
p1yr	C	S01GX	1305	13	390640	2502	0.0535538	1.05501	0.60683	1.83421	0.85	0	S01GX Other antiallergics	0.895
p1yr	C	S01XA	1236	82	371393	21749	-0.211335	0.809502	0.642986	1.01914	0.0721	0	S01XA Other ophthalmologicals	0.123
p1yr	C	S02AA	1310	8	391880	1262	0.345932	1.41331	0.701229	2.84848	0.333	0	S02AA Antiinfectives	0.454
p1yr	C	S02CA	1313	5	392018	1124	0.0543811	1.05589	0.436427	2.5546	0.904	0	S02CA Corticosteroids and antiinfectives in combination	0.925
p1yr	C	V03AE	1307	11	393007	135	2.00082	7.39514	3.67259	14.8909	2.11e-08	-1	V03AE Drugs for treatment of hyperkalemia and hyperphosphatemia	1.35e-07
p1yr	C	V06DC	1307	11	392811	331	1.23779	3.44799	1.82708	6.50692	0.000133	-1	V06DC Carbohydrates	0.000509
p1yr	C	V07AY	1229	89	381878	11264	0.191445	1.211	0.956327	1.53349	0.112	0	V07AY Other non-therapeutic auxiliary products	0.18
p1yr	D	A01AB	164	6	385401	7741	0.280139	1.32331	0.578271	3.02827	0.507	0	A01AB Antiinfectives and antiseptics for local oral treatment	0.596
p1yr	D	A02BA	161	9	386194	6948	0.471928	1.60308	0.803436	3.1986	0.181	0	A02BA H2-receptor antagonists [DG:DG01481]	0.236
p1yr	D	A02BC	104	66	283814	109328	-0.172615	0.841461	0.604417	1.17147	0.306	0	A02BC Proton pump inhibitors [DG:DG01646]	0.378
p1yr	D	A02BX	159	11	383722	9420	0.443263	1.55778	0.830977	2.92028	0.167	0	A02BX Other drugs for peptic ulcer and gastro-oesophageal reflux disease (GORD)	0.231
p1yr	D	A03BB	152	18	390072	3070	2.28632	9.83867	5.89679	16.4156	2.07e-18	-1	A03BB Belladonna alkaloids, semisynthetic, quaternary ammonium compounds	4.86e-17
p1yr	D	A03FA	162	8	391336	1806	2.04477	7.72737	3.7168	16.0655	4.36e-08	-1	A03FA Propulsives [DG:DG01763]	3.15e-07
p1yr	D	A06AA	158	12	389191	3951	1.0865	2.9639	1.61449	5.44115	0.000456	-1	A06AA Softeners, emollients	0.00126
p1yr	D	A06AB	134	36	387741	5401	1.93818	6.94608	4.63475	10.4101	6.08e-21	-1	A06AB Contact laxatives	1.91e-19
p1yr	D	A06AD	121	49	375078	18064	1.37492	3.95475	2.78957	5.60662	1.16e-14	-1	A06AD Osmotically acting laxatives	2.18e-13
p1yr	D	A07AA	163	7	390951	2191	1.62221	5.06427	2.32938	11.0102	4.24e-05	-1	A07AA Antibiotics	0.000148
p1yr	D	A07DA	161	9	389087	4055	1.02946	2.79954	1.4018	5.59098	0.00353	-1	A07DA Antipropulsives	0.00897
p1yr	D	A10AB	151	19	383004	10138	0.59584	1.81455	0.976379	3.37226	0.0595	0	A10AB Insulins and analogues for injection, fast-acting	0.106
p1yr	D	A10AD	164	6	391353	1789	0.726397	2.06762	0.843919	5.0657	0.112	0	A10AD Insulins and analogues for injection, intermediate- or long-acting combined with fast-acting	0.178
p1yr	D	A10AE	163	7	390087	3055	0.658845	1.93256	0.833392	4.48142	0.125	0	A10AE Insulins and analogues for injection, long-acting	0.196
p1yr	D	A10BA	153	17	369828	23314	-0.682178	0.505515	0.277952	0.919386	0.0254	1	A10BA Biguanides [DG:DG01684]	0.0497
p1yr	D	A10BB	163	7	386387	6755	-0.307534	0.735258	0.323953	1.66878	0.462	0	A10BB Sulfonylureas	0.55
p1yr	D	A10BH	163	7	387096	6046	-0.2148	0.806703	0.355093	1.83268	0.608	0	A10BH Dipeptidyl peptidase 4 (DPP-4) inhibitors [DG:DG01601]	0.649
p1yr	D	A11CC	156	14	384921	8221	0.886226	2.42596	1.37387	4.28371	0.00225	-1	A11CC Vitamin D and analogues	0.00588
p1yr	D	A11DA	160	10	391551	1591	1.91759	6.80451	3.41206	13.5699	5.19e-08	-1	A11DA Vitamin B1, plain	3.48e-07
p1yr	D	A12AX	138	32	358488	34654	0.516716	1.67651	1.11503	2.52074	0.013	-1	A12AX Calcium, combinations with vitamin D and/or other drugs	0.0276
p1yr	D	B01AA	164	6	386684	6458	-0.245593	0.78224	0.342241	1.78792	0.56	0	B01AA Vitamin K antagonists	0.63
p1yr	D	B01AC	131	39	349128	44014	-0.287019	0.750497	0.502656	1.12054	0.161	0	B01AC Platelet aggregation inhibitors excl. heparin	0.226
p1yr	D	B01AF	144	26	376098	17044	0.449925	1.56819	1.01737	2.41724	0.0415	-1	B01AF Direct factor Xa inhibitors	0.078
p1yr	D	B03AA	150	20	385045	8097	0.935689	2.54897	1.54882	4.19497	0.000232	-1	B03AA Iron bivalent, oral preparations	0.000703
p1yr	D	B03BA	160	10	384889	8253	0.357543	1.42981	0.741612	2.75665	0.286	0	B03BA Vitamin B12 (cyanocobalamin and analogues)	0.358
p1yr	D	B03BB	147	23	384571	8571	1.27934	3.59428	2.28129	5.66296	3.47e-08	-1	B03BB Folic acid and derivatives	2.72e-07
p1yr	D	B05CB	165	5	392623	519	2.17817	8.83009	3.5323	22.0736	3.17e-06	-1	B05CB Salt solutions	1.42e-05
p1yr	D	C01AA	164	6	390817	2325	0.601763	1.82533	0.788895	4.22343	0.16	0	C01AA Digitalis glycosides [DG:DG01697]	0.226
p1yr	D	C01DA	160	10	382471	10671	-0.476384	0.621025	0.309187	1.24737	0.181	0	C01DA Organic nitrates	0.236
p1yr	D	C02CA	164	6	384232	8910	-0.600104	0.548754	0.239119	1.25934	0.157	0	C02CA Alpha-adrenoreceptor antagonists	0.226
p1yr	D	C03AA	161	9	377052	16090	-0.431056	0.649823	0.326162	1.29466	0.22	0	C03AA Thiazides, plain [DG:DG01749]	0.283
p1yr	D	C03BA	159	11	384490	8652	0.563283	1.75643	0.939273	3.2845	0.0778	0	C03BA Sulfonamides, plain	0.126
p1yr	D	C03CA	140	30	381915	11227	0.735393	2.0863	1.34498	3.23623	0.00103	-1	C03CA Sulfonamides, plain	0.00277
p1yr	D	C07AB	129	41	350509	42633	-0.0950172	0.909357	0.613368	1.34818	0.636	0	C07AB Beta blocking agents, selective	0.672
p1yr	D	C08CA	133	37	327494	65648	-0.44635	0.639959	0.436635	0.937965	0.0221	1	C08CA Dihydropyridine derivatives [DG:DG01928]	0.0442
p1yr	D	C09AA	135	35	331703	61439	-0.494113	0.610112	0.412763	0.901817	0.0132	1	C09AA ACE inhibitors, plain [DG:DG01501]	0.0276
p1yr	D	C09CA	148	22	358901	34241	-0.317446	0.728006	0.458229	1.15661	0.179	0	C09CA Angiotensin II receptor blockers, plain [DG:DG01495]	0.236
p1yr	D	C10AA	91	79	255620	137522	-0.684355	0.504415	0.362644	0.701612	4.81e-05	1	C10AA HMG CoA reductase inhibitors [DG:DG01660]	0.000156
p1yr	D	D01AC	148	22	380909	12233	0.996057	2.70758	1.70679	4.29519	2.33e-05	-1	D01AC Imidazole and triazole derivatives	8.42e-05
p1yr	D	D02AE	165	5	391360	1782	1.29764	3.66063	1.48904	8.9992	0.00469	-1	D02AE Carbamide products	0.0116
p1yr	D	D02AX	130	40	371138	22004	0.97776	2.6585	1.83792	3.84543	2.08e-07	-1	D02AX Other emollients and protectives	1.22e-06
p1yr	D	D06AX	165	5	390094	3048	0.852718	2.34602	0.937362	5.87157	0.0685	0	D06AX Other antibiotics for topical use	0.117
p1yr	D	D07AA	163	7	388016	5126	0.863711	2.37195	1.10111	5.10949	0.0274	-1	D07AA Corticosteroids, weak (group I)	0.0526
p1yr	D	D07AC	157	13	379641	13501	0.433954	1.54335	0.867606	2.7454	0.14	0	D07AC Corticosteroids, potent (group III)	0.216
p1yr	D	D07CC	161	9	389723	3419	1.28901	3.62921	1.80276	7.30609	0.000305	-1	D07CC Corticosteroids, potent, combinations with antibiotics	0.000896
p1yr	D	D09AA	165	5	392555	587	2.21985	9.20591	3.7081	22.8551	1.71e-06	-1	D09AA Medicated dressings with antiinfectives	8.04e-06
p1yr	D	G04BD	161	9	382123	11019	0.00209515	1.0021	0.506748	1.98165	0.995	0	G04BD Urinary antispasmodics	0.995
p1yr	D	G04BE	160	10	380209	12933	0.174947	1.19118	0.618462	2.29427	0.601	0	G04BE Drugs used in erectile dysfunction	0.649
p1yr	D	G04CA	165	5	391718	1424	1.17874	3.25026	1.31017	8.06325	0.011	-1	G04CA Alpha-adrenoreceptor antagonists	0.024
p1yr	D	G04CB	164	6	384405	8737	-0.611004	0.542806	0.237197	1.24216	0.148	0	G04CB Testosterone-5-alpha reductase inhibitors	0.217
p1yr	D	H02AB	140	30	372897	20245	0.961645	2.616	1.70597	4.01147	1.04e-05	-1	H02AB Glucocorticoids	3.91e-05
p1yr	D	H03AA	150	20	359009	34133	0.204815	1.2273	0.752753	2.001	0.411	0	H03AA Thyroid hormones	0.495
p1yr	D	J01AA	146	24	376970	16172	0.883657	2.41973	1.53076	3.82496	0.000155	-1	J01AA Tetracyclines [DG:DG01197]	0.000486
p1yr	D	J01CA	128	42	366276	26866	1.109	3.03134	2.11297	4.34885	1.72e-09	-1	J01CA Penicillins with extended spectrum [DG:DG01780]	1.8e-08
p1yr	D	J01CF	141	29	380509	12633	1.37661	3.96145	2.62793	5.97164	4.9e-11	-1	J01CF Beta-lactamase resistant penicillins [DG:DG01779]	6.58e-10
p1yr	D	J01CR	158	12	388192	4950	1.37912	3.97139	2.18159	7.22955	6.42e-06	-1	J01CR Combinations of penicillins, incl. beta-lactamase inhibitors	2.62e-05
p1yr	D	J01EA	160	10	388287	4855	0.9281	2.5297	1.2973	4.93282	0.00645	-1	J01EA Trimethoprim and derivatives [DG:DG01581]	0.0155
p1yr	D	J01FA	156	14	384061	9081	1.0216	2.77762	1.58315	4.87332	0.000369	-1	J01FA Macrolides [DG:DG01551]	0.00105
p1yr	D	J01MA	164	6	390677	2465	1.15157	3.16316	1.37802	7.26082	0.0066	-1	J01MA Fluoroquinolones [DG:DG01549]	0.0155
p1yr	D	J01XE	139	31	374700	18442	1.25127	3.49476	2.32089	5.26236	2.08e-09	-1	J01XE Nitrofuran derivatives	1.96e-08
p1yr	D	J07BB	162	8	381898	11244	0.208659	1.23202	0.602861	2.5178	0.567	0	J07BB Influenza vaccines	0.63
p1yr	D	M01AE	161	9	372778	20364	0.149763	1.16156	0.590613	2.28444	0.664	0	M01AE Propionic acid derivatives	0.694
p1yr	D	M02AA	144	26	373860	19282	0.536895	1.71069	1.11118	2.63363	0.0147	-1	M02AA Antiinflammatory preparations, non-steroids for topical use	0.03
p1yr	D	M04AA	161	9	382946	10196	-0.206479	0.813443	0.405869	1.6303	0.56	0	M04AA Preparations inhibiting uric acid production	0.63
p1yr	D	M05BA	151	19	379446	13696	1.04284	2.83725	1.71682	4.68892	4.73e-05	-1	M05BA Bisphosphonates [DG:DG01600]	0.000156
p1yr	D	N02AA	134	36	387416	5726	2.25777	9.56174	6.39128	14.305	4.55e-28	-1	N02AA Natural opium alkaloids	2.14e-26
p1yr	D	N02AE	159	11	391173	1969	1.68555	5.39544	2.8402	10.2496	2.63e-07	-1	N02AE Oripavine derivatives	1.42e-06
p1yr	D	N02AJ	146	24	369619	23523	0.40364	1.49726	0.961091	2.33256	0.0743	0	N02AJ Opioids in combination with non-opioid analgesics	0.125
p1yr	D	N02AX	161	9	386054	7088	0.519182	1.68065	0.839472	3.36472	0.143	0	N02AX Other opioids	0.216
p1yr	D	N02BE	89	81	343710	49432	1.07895	2.94158	2.11695	4.08745	1.29e-10	-1	N02BE Anilides	1.52e-09
p1yr	D	N03AX	137	33	376275	16867	1.10526	3.02	2.01399	4.52855	8.95e-08	-1	N03AX Other antiepileptics	5.61e-07
p1yr	D	N04BA	163	7	390648	2494	1.0709	2.91801	1.34181	6.34574	0.0069	-1	N04BA Dopa and dopa derivatives	0.0158
p1yr	D	N05AD	164	6	392921	221	2.75916	15.7865	6.2072	40.1493	6.9e-09	-1	N05AD Butyrophenone derivatives [DG:DG01940]	5.9e-08
p1yr	D	N05AX	162	8	392299	843	1.92773	6.87391	3.04188	15.5334	3.58e-06	-1	N05AX Other antipsychotics	1.53e-05
p1yr	D	N05BA	150	20	387526	5616	1.7764	5.90853	3.58281	9.74396	3.41e-12	-1	N05BA Benzodiazepine derivatives [DG:DG01914]	5.34e-11
p1yr	D	N05CD	145	25	391787	1355	3.05107	21.138	13.3002	33.5947	4.15e-38	-1	N05CD Benzodiazepine derivatives	3.9e-36
p1yr	D	N05CF	165	5	386905	6237	0.191132	1.21062	0.490285	2.98928	0.679	0	N05CF Benzodiazepine related drugs	0.701
p1yr	D	N06AA	156	14	371462	21680	0.169162	1.18431	0.676504	2.0733	0.554	0	N06AA Non-selective monoamine reuptake inhibitors [DG:DG01730]	0.63
p1yr	D	N06AB	149	21	363943	29199	0.352113	1.42207	0.859185	2.35372	0.171	0	N06AB Selective serotonin reuptake inhibitors	0.233
p1yr	D	N06AX	153	17	381788	11354	0.729204	2.07343	1.20728	3.561	0.00823	-1	N06AX Other antidepressants	0.0184
p1yr	D	N06DA	159	11	391006	2136	0.703474	2.02076	0.963526	4.23805	0.0626	0	N06DA Anticholinesterases	0.109
p1yr	D	N06DX	157	13	392134	1008	1.79295	6.00715	3.033	11.8978	2.72e-07	-1	N06DX Other anti-dementia drugs	1.42e-06
p1yr	D	R01AD	163	7	367822	25320	-0.686416	0.503377	0.235021	1.07815	0.0773	0	R01AD Corticosteroids	0.126
p1yr	D	R03AC	148	22	354667	38475	0.0841294	1.08777	0.627467	1.88575	0.764	0	R03AC Selective beta-2-adrenoreceptor agonists	0.772
p1yr	D	R03AK	158	12	372482	20660	0.187373	1.20608	0.608023	2.39238	0.592	0	R03AK Adrenergics in combination with corticosteroids or other drugs, excl. anticholinergics	0.647
p1yr	D	R03AL	164	6	390049	3093	0.535303	1.70797	0.695469	4.19451	0.243	0	R03AL Adrenergics in combination with anticholinergics incl. triple combinations with corticosteroids	0.309
p1yr	D	R03BB	163	7	386934	6208	0.15222	1.16442	0.50535	2.68303	0.721	0	R03BB Anticholinergics	0.737
p1yr	D	R05CB	162	8	389370	3772	0.770346	2.16051	0.997268	4.68061	0.0508	0	R05CB Mucolytics	0.0918
p1yr	D	R05DA	158	12	381378	11764	0.442284	1.55626	0.858479	2.8212	0.145	0	R05DA Opium alkaloids and derivatives	0.216
p1yr	D	R06AE	151	19	383627	9515	1.20965	3.35231	2.04994	5.4821	1.43e-06	-1	R06AE Piperazine derivatives	7.07e-06
p1yr	D	R06AX	163	7	381954	11188	0.223077	1.24992	0.579323	2.69675	0.57	0	R06AX Other antihistamines for systemic use	0.63
p1yr	D	S01AA	159	11	388835	4307	1.40483	4.07483	2.18447	7.60103	1e-05	-1	S01AA Antibiotics	3.91e-05
p1yr	D	S01XA	158	12	371393	21749	-0.258425	0.772267	0.424621	1.40454	0.397	0	S01XA Other ophthalmologicals	0.485
p1yr	D	V07AY	154	16	381878	11264	0.586854	1.79832	1.01345	3.19103	0.0449	-1	V07AY Other non-therapeutic auxiliary products	0.0828
p1yr	E	A01AB	3732	126	385401	7741	0.42665	1.53212	1.27902	1.8353	3.63e-06	-1	A01AB Antiinfectives and antiseptics for local oral treatment	2.2e-05
p1yr	E	A01AD	3826	32	391604	1538	0.56812	1.76495	1.23578	2.5207	0.00178	-1	A01AD Other agents for local oral treatment	0.00618
p1yr	E	A02BA	3761	97	386194	6948	0.190753	1.21016	0.983795	1.48861	0.071	0	A02BA H2-receptor antagonists [DG:DG01481]	0.163
p1yr	E	A02BC	2610	1248	283814	109328	0.114887	1.12175	1.04212	1.20745	0.00223	-1	A02BC Proton pump inhibitors [DG:DG01646]	0.00752
p1yr	E	A02BX	3715	143	383722	9420	0.339812	1.40468	1.18217	1.66908	0.000112	-1	A02BX Other drugs for peptic ulcer and gastro-oesophageal reflux disease (GORD)	0.000539
p1yr	E	A03AA	3811	47	388996	4146	0.0346311	1.03524	0.772781	1.38683	0.816	0	A03AA Synthetic anticholinergics, esters with tertiary amino group	0.891
p1yr	E	A03AX	3839	19	391432	1710	-0.0183532	0.981814	0.622129	1.54945	0.937	0	A03AX Other drugs for functional gastrointestinal disorders	0.96
p1yr	E	A03BB	3781	77	390072	3070	0.75508	2.12778	1.685	2.68691	2.25e-10	-1	A03BB Belladonna alkaloids, semisynthetic, quaternary ammonium compounds	2.31e-09
p1yr	E	A03FA	3821	37	391336	1806	0.529747	1.6985	1.21891	2.36679	0.00175	-1	A03FA Propulsives [DG:DG01763]	0.00618
p1yr	E	A04AA	3850	8	392749	393	0.546866	1.72783	0.852076	3.50367	0.13	0	A04AA Serotonin (5HT3) antagonists	0.243
p1yr	E	A05AA	3851	7	392636	506	0.330914	1.39224	0.658612	2.94305	0.386	0	A05AA Bile acid and derivatives [DG:DG01956]	0.515
p1yr	E	A06AA	3753	105	389191	3951	0.813784	2.25643	1.84231	2.76363	3.66e-15	-1	A06AA Softeners, emollients	6.64e-14
p1yr	E	A06AB	3665	193	387741	5401	1.06235	2.89315	2.47466	3.38242	1.66e-40	-1	A06AB Contact laxatives	1.96e-38
p1yr	E	A06AC	3839	19	390620	2522	-0.219722	0.802742	0.509489	1.26479	0.344	0	A06AC Bulk-forming laxatives	0.486
p1yr	E	A06AD	3494	364	375078	18064	0.711216	2.03647	1.81679	2.28271	2.72e-34	-1	A06AD Osmotically acting laxatives	2.14e-32
p1yr	E	A06AG	3841	17	392795	347	1.3654	3.91728	2.36829	6.4794	1.05e-07	-1	A06AG Enemas	7.74e-07
p1yr	E	A06AX	3844	14	392179	963	0.238655	1.26954	0.743666	2.16728	0.382	0	A06AX Other drugs for constipation	0.512
p1yr	E	A07AA	3804	54	390951	2191	0.763376	2.14551	1.62617	2.8307	6.72e-08	-1	A07AA Antibiotics	5.25e-07
p1yr	E	A07DA	3787	71	389087	4055	0.443556	1.55824	1.22388	1.98395	0.000319	-1	A07DA Antipropulsives	0.00139
p1yr	E	A07EC	3820	38	389491	3651	-0.0409915	0.959837	0.694996	1.3256	0.803	0	A07EC Aminosalicylic acid and similar agents	0.881
p1yr	E	A08AB	3848	10	392732	410	0.298081	1.34727	0.715375	2.53732	0.356	0	A08AB Peripherally acting antiobesity products	0.494
p1yr	E	A09AA	3853	5	392306	836	-0.679584	0.506828	0.20967	1.22514	0.131	0	A09AA Enzyme preparations	0.243
p1yr	E	A09AB	3847	11	392980	162	1.53034	4.61973	2.47599	8.61953	1.52e-06	-1	A09AB Acid preparations	9.7e-06
p1yr	E	A10AB	3690	168	383004	10138	0.0274728	1.02785	0.85277	1.23888	0.773	0	A10AB Insulins and analogues for injection, fast-acting	0.861
p1yr	E	A10AC	3838	20	391989	1153	0.00574979	1.00577	0.638137	1.58519	0.98	0	A10AC Insulins and analogues for injection, intermediate-acting	0.98
p1yr	E	A10AD	3816	42	391353	1789	0.259352	1.29609	0.936718	1.79334	0.117	0	A10AD Insulins and analogues for injection, intermediate- or long-acting combined with fast-acting	0.228
p1yr	E	A10AE	3821	37	390087	3055	-0.377066	0.685871	0.487586	0.964793	0.0303	1	A10AE Insulins and analogues for injection, long-acting	0.0777
p1yr	E	A10BA	3545	313	369828	23314	-0.176495	0.838203	0.722895	0.971903	0.0194	1	A10BA Biguanides [DG:DG01684]	0.0541
p1yr	E	A10BB	3761	97	386387	6755	-0.101235	0.903721	0.723686	1.12854	0.372	0	A10BB Sulfonylureas	0.51
p1yr	E	A10BD	3847	11	392761	381	0.450687	1.56939	0.848456	2.9029	0.151	0	A10BD Combinations of oral blood glucose lowering drugs	0.266
p1yr	E	A10BG	3848	10	392339	803	-0.199587	0.819069	0.435657	1.53991	0.535	0	A10BG Thiazolidinediones [DG:DG01683]	0.675
p1yr	E	A10BH	3770	88	387096	6046	-0.0689918	0.933334	0.74224	1.17363	0.555	0	A10BH Dipeptidyl peptidase 4 (DPP-4) inhibitors [DG:DG01601]	0.697
p1yr	E	A10BJ	3830	28	391309	1833	-0.324627	0.722797	0.49037	1.06539	0.101	0	A10BJ Glucagon-like peptide-1 receptor (GLP-1) analogues	0.209
p1yr	E	A10BK	3801	57	389384	3758	-0.175853	0.838741	0.635513	1.10696	0.214	0	A10BK Sodium-glucose co-transporter 2 (SGLT2) inhibitors	0.344
p1yr	E	A11CC	3714	144	384921	8221	0.366224	1.44228	1.21371	1.71389	3.18e-05	-1	A11CC Vitamin D and analogues	0.000167
p1yr	E	A11DA	3817	41	391551	1591	0.558477	1.74801	1.26743	2.41081	0.000662	-1	A11DA Vitamin B1, plain	0.00274
p1yr	E	A11EX	3846	12	392234	908	-0.204589	0.814982	0.456027	1.45648	0.49	0	A11EX Vitamin B-complex, other combinations	0.626
p1yr	E	A12AA	3840	18	392405	737	0.819135	2.26854	1.4127	3.64285	0.0007	-1	A12AA Calcium	0.00282
p1yr	E	A12AX	3498	360	358488	34654	0.119515	1.12695	1.00541	1.26318	0.0401	-1	A12AX Calcium, combinations with vitamin D and/or other drugs	0.0986
p1yr	E	A12BA	3850	8	392823	319	0.753605	2.12465	1.04579	4.31648	0.0372	-1	A12BA Potassium	0.0924
p1yr	E	B01AA	3785	73	386684	6458	0.0256527	1.02598	0.808964	1.30123	0.832	0	B01AA Vitamin K antagonists	0.897
p1yr	E	B01AB	3843	15	392437	705	0.653861	1.92295	1.14485	3.22988	0.0135	-1	B01AB Heparin group	0.0403
p1yr	E	B01AC	3362	496	349128	44014	-0.0748515	0.927881	0.828926	1.03865	0.193	0	B01AC Platelet aggregation inhibitors excl. heparin	0.318
p1yr	E	B01AE	3850	8	392339	803	0.0289059	1.02933	0.511003	2.0734	0.935	0	B01AE Direct thrombin inhibitors	0.96
p1yr	E	B01AF	3632	226	376098	17044	0.312429	1.36674	1.18807	1.57228	1.24e-05	-1	B01AF Direct factor Xa inhibitors	6.81e-05
p1yr	E	B02AA	3853	5	392889	253	0.45185	1.57122	0.646625	3.81785	0.319	0	B02AA Amino acids	0.463
p1yr	E	B03AA	3706	152	385045	8097	0.381028	1.46379	1.23421	1.73607	1.2e-05	-1	B03AA Iron bivalent, oral preparations	6.74e-05
p1yr	E	B03BA	3711	147	384889	8253	0.407359	1.50284	1.26669	1.78302	3.01e-06	-1	B03BA Vitamin B12 (cyanocobalamin and analogues)	1.87e-05
p1yr	E	B03BB	3690	168	384571	8571	0.536078	1.70929	1.45572	2.00703	6.03e-11	-1	B03BB Folic acid and derivatives	6.47e-10
p1yr	E	B05CB	3833	25	392623	519	1.42423	4.15465	2.76022	6.25353	8.72e-12	-1	B05CB Salt solutions	1.21e-10
p1yr	E	B05XA	3850	8	392688	454	0.0126362	1.01272	0.495225	2.07097	0.972	0	B05XA Electrolyte solutions	0.978
p1yr	E	C01AA	3821	37	390817	2325	0.344813	1.41173	1.01304	1.96732	0.0417	-1	C01AA Digitalis glycosides [DG:DG01697]	0.101
p1yr	E	C01BC	3850	8	391940	1202	-0.291018	0.747502	0.372357	1.5006	0.413	0	C01BC Antiarrhythmics, class Ic [DG:DG01650]	0.541
p1yr	E	C01BD	3845	13	392409	733	0.364508	1.4398	0.821162	2.52452	0.203	0	C01BD Antiarrhythmics, class III [DG:DG01648]	0.328
p1yr	E	C01CA	3847	11	392126	1016	0.0650969	1.06726	0.587576	1.93856	0.831	0	C01CA Adrenergic and dopaminergic agents	0.897
p1yr	E	C01DA	3681	177	382471	10671	0.206218	1.22902	1.03376	1.46117	0.0195	-1	C01DA Organic nitrates	0.0541
p1yr	E	C01DX	3840	18	391581	1561	-0.417737	0.658536	0.408311	1.06211	0.0867	0	C01DX Other vasodilators used in cardiac diseases	0.188
p1yr	E	C01EB	3831	27	391956	1186	0.33002	1.391	0.938175	2.06238	0.101	0	C01EB Other cardiac preparations	0.209
p1yr	E	C02AC	3850	8	392549	593	-0.0160587	0.98407	0.487206	1.98764	0.964	0	C02AC Imidazoline receptor agonists	0.978
p1yr	E	C02CA	3760	98	384232	8910	-0.130717	0.877466	0.712975	1.07991	0.217	0	C02CA Alpha-adrenoreceptor antagonists	0.346
p1yr	E	C03AA	3726	132	377052	16090	-0.227421	0.796585	0.665287	0.953797	0.0133	1	C03AA Thiazides, plain [DG:DG01749]	0.0402
p1yr	E	C03BA	3767	91	384490	8652	-0.0407412	0.960078	0.776516	1.18703	0.707	0	C03BA Sulfonamides, plain	0.818
p1yr	E	C03CA	3636	222	381915	11227	0.474947	1.60793	1.38544	1.86614	4.09e-10	-1	C03CA Sulfonamides, plain	3.71e-09
p1yr	E	C03DA	3804	54	389430	3712	0.0777711	1.08088	0.81906	1.42638	0.583	0	C03DA Aldosterone antagonists	0.717
p1yr	E	C03DB	3853	5	392927	215	0.515298	1.67414	0.673117	4.16382	0.268	0	C03DB Other potassium-sparing agents	0.415
p1yr	E	C03EB	3850	8	392772	370	0.627217	1.87239	0.924285	3.79304	0.0816	0	C03EB High-ceiling diuretics and potassium-sparing agents	0.18
p1yr	E	C05AE	3852	6	392705	437	0.12324	1.13116	0.503649	2.54049	0.765	0	C05AE Muscle relaxants	0.856
p1yr	E	C05AX	3805	53	389099	4043	0.180896	1.19829	0.910373	1.57727	0.197	0	C05AX Other agents for treatment of hemorrhoids and anal fissures for topical use	0.321
p1yr	E	C07AA	3809	49	388281	4861	-0.0386619	0.962076	0.723811	1.27877	0.79	0	C07AA Beta blocking agents, non-selective	0.871
p1yr	E	C07AB	3406	452	350509	42633	-0.110766	0.895148	0.799485	1.00226	0.0548	0	C07AB Beta blocking agents, selective	0.131
p1yr	E	C07AG	3845	13	392574	568	0.519987	1.68201	0.962787	2.9385	0.0677	0	C07AG Alpha and beta blocking agents	0.157
p1yr	E	C08CA	3225	633	327494	65648	-0.116409	0.890111	0.81099	0.976951	0.0143	1	C08CA Dihydropyridine derivatives [DG:DG01928]	0.0422
p1yr	E	C08DA	3849	9	392285	857	-0.0613994	0.940448	0.485314	1.82241	0.856	0	C08DA Phenylalkylamine derivatives	0.914
p1yr	E	C08DB	3827	31	389438	3704	-0.425783	0.653258	0.455696	0.936471	0.0205	1	C08DB Benzothiazepine derivatives	0.0556
p1yr	E	C09AA	3270	588	331703	61439	-0.245441	0.782359	0.710395	0.861614	6.19e-07	1	C09AA ACE inhibitors, plain [DG:DG01501]	4.17e-06
p1yr	E	C09CA	3533	325	358901	34241	-0.199011	0.819541	0.726438	0.924575	0.00122	1	C09CA Angiotensin II receptor blockers, plain [DG:DG01495]	0.00468
p1yr	E	C09DX	3850	8	392750	392	0.388031	1.47408	0.726903	2.98926	0.282	0	C09DX Angiotensin II receptor blockers (ARBs), other combinations	0.429
p1yr	E	C10AA	2600	1258	255620	137522	-0.278247	0.75711	0.698781	0.820306	1.03e-11	1	C10AA HMG CoA reductase inhibitors [DG:DG01660]	1.28e-10
p1yr	E	C10AB	3842	16	391471	1671	-0.351376	0.703719	0.42749	1.15844	0.167	0	C10AB Fibrates	0.286
p1yr	E	C10AC	3845	13	392386	756	0.42489	1.52942	0.880941	2.65526	0.131	0	C10AC Bile acid sequestrants	0.243
p1yr	E	C10AX	3813	45	388838	4304	-0.142212	0.867437	0.642851	1.17049	0.352	0	C10AX Other lipid modifying agents	0.494
p1yr	E	D01AC	3640	218	380909	12233	0.48773	1.62862	1.41535	1.87401	9.7e-12	-1	D01AC Imidazole and triazole derivatives	1.27e-10
p1yr	E	D01AE	3818	40	390817	2325	0.492345	1.63615	1.19253	2.2448	0.00228	-1	D01AE Other antifungals for topical use	0.00758
p1yr	E	D01BA	3827	31	391754	1388	0.776502	2.17385	1.51774	3.11361	2.28e-05	-1	D01BA Antifungals for systemic use	0.000122
p1yr	E	D02AC	3790	68	386841	6301	0.0389189	1.03969	0.814663	1.32686	0.754	0	D02AC Soft paraffin and fat products	0.851
p1yr	E	D02AE	3832	26	391360	1782	0.264498	1.30278	0.880046	1.92857	0.186	0	D02AE Carbamide products	0.309
p1yr	E	D02AX	3503	355	371138	22004	0.41599	1.51587	1.35245	1.69904	8.87e-13	-1	D02AX Other emollients and protectives	1.4e-11
p1yr	E	D05AX	3816	42	389483	3659	0.107996	1.11404	0.819129	1.51514	0.491	0	D05AX Other antipsoriatics for topical use	0.626
p1yr	E	D06AX	3804	54	390094	3048	0.474205	1.60674	1.22075	2.11477	0.000717	-1	D06AX Other antibiotics for topical use	0.00282
p1yr	E	D06BA	3851	7	393046	96	1.77531	5.90214	2.69445	12.9285	9.1e-06	-1	D06BA Sulfonamides	5.24e-05
p1yr	E	D06BB	3847	11	392392	750	0.396276	1.48628	0.816965	2.70394	0.194	0	D06BB Antivirals	0.318
p1yr	E	D06BX	3837	21	391376	1766	0.217559	1.24304	0.806212	1.91655	0.325	0	D06BX Other chemotherapeutics	0.465
p1yr	E	D07AA	3793	65	388016	5126	0.242735	1.27473	0.994149	1.6345	0.0557	0	D07AA Corticosteroids, weak (group I)	0.131
p1yr	E	D07AB	3800	58	388587	4555	0.247795	1.2812	0.985359	1.66586	0.0643	0	D07AB Corticosteroids, moderately potent (group II)	0.15
p1yr	E	D07AC	3694	164	379641	13501	0.188203	1.20708	1.02984	1.41482	0.0202	-1	D07AC Corticosteroids, potent (group III)	0.0554
p1yr	E	D07AD	3799	59	388579	4563	0.296188	1.34472	1.03665	1.74435	0.0257	-1	D07AD Corticosteroids, very potent (group IV)	0.0674
p1yr	E	D07BC	3852	6	392459	683	-0.265346	0.766941	0.341194	1.72394	0.521	0	D07BC Corticosteroids, potent, combinations with antiseptics	0.661
p1yr	E	D07CA	3834	24	391362	1780	0.275386	1.31704	0.877349	1.97708	0.184	0	D07CA Corticosteroids, weak, combinations with antibiotics	0.309
p1yr	E	D07CC	3789	69	389723	3419	0.636794	1.89041	1.48277	2.41012	2.77e-07	-1	D07CC Corticosteroids, potent, combinations with antibiotics	1.92e-06
p1yr	E	D07CD	3840	18	392226	916	0.551901	1.73655	1.08409	2.7817	0.0217	-1	D07CD Corticosteroids, very potent, combinations with antibiotics	0.0575
p1yr	E	D09AA	3833	25	392555	587	1.32098	3.74708	2.4902	5.63834	2.36e-10	-1	D09AA Medicated dressings with antiinfectives	2.32e-09
p1yr	E	D10AF	3853	5	392745	397	0.0830804	1.08663	0.448545	2.63243	0.854	0	D10AF Antiinfectives for treatment of acne	0.914
p1yr	E	D11AC	3832	26	391693	1449	0.422313	1.52549	1.03035	2.25856	0.0349	-1	D11AC Medicated shampoos	0.0876
p1yr	E	D11AH	3852	6	392559	583	-0.0397038	0.961074	0.429046	2.15283	0.923	0	D11AH Agents for dermatitis, excluding corticosteroids	0.96
p1yr	E	D11AX	3851	7	392650	492	0.343719	1.41018	0.666235	2.98485	0.369	0	D11AX Other dermatologicals	0.509
p1yr	E	G01AF	3810	48	390877	2265	0.565708	1.76069	1.31382	2.35956	0.000152	-1	G01AF Imidazole derivatives	0.000717
p1yr	E	G03AC	3850	8	392259	883	-0.405824	0.666428	0.331047	1.34158	0.256	0	G03AC Progestogens	0.403
p1yr	E	G03BA	3839	19	391967	1175	0.114638	1.12147	0.70666	1.77977	0.627	0	G03BA 3-oxoandrosten (4) derivatives	0.755
p1yr	E	G03CA	3679	179	371957	21185	-0.0769791	0.925909	0.792499	1.08178	0.332	0	G03CA Natural and semisynthetic estrogens, plain	0.472
p1yr	E	G03CX	3852	6	392620	522	0.160184	1.17373	0.523404	2.63207	0.698	0	G03CX Other estrogens	0.811
p1yr	E	G03DA	3845	13	392001	1141	0.00926608	1.00931	0.582201	1.74975	0.974	0	G03DA Pregnen (4) derivatives	0.978
p1yr	E	G03FA	3842	16	392132	1010	0.376562	1.45727	0.885937	2.39704	0.138	0	G03FA Progestogens and estrogens, fixed combinations	0.252
p1yr	E	G03FB	3830	28	391500	1642	0.427867	1.53398	1.05073	2.2395	0.0267	-1	G03FB Progestogens and estrogens, sequential preparations	0.0692
p1yr	E	G04BD	3729	129	382123	11019	0.0750158	1.0779	0.900601	1.29011	0.413	0	G04BD Urinary antispasmodics	0.541
p1yr	E	G04BE	3709	149	380209	12933	0.0104553	1.01051	0.852939	1.19719	0.904	0	G04BE Drugs used in erectile dysfunction	0.952
p1yr	E	G04CA	3841	17	391718	1424	0.12334	1.13127	0.697582	1.83458	0.617	0	G04CA Alpha-adrenoreceptor antagonists	0.747
p1yr	E	G04CB	3778	80	384405	8737	-0.0644575	0.937576	0.746611	1.17739	0.579	0	G04CB Testosterone-5-alpha reductase inhibitors	0.715
p1yr	E	H01BA	3853	5	392924	218	0.715372	2.04495	0.839026	4.98412	0.116	0	H01BA Vasopressin and analogues [DG:DG01952]	0.228
p1yr	E	H02AA	3845	13	392620	522	0.783945	2.1901	1.24928	3.83941	0.0062	-1	H02AA Mineralocorticoids	0.0195
p1yr	E	H02AB	3536	322	372897	20245	0.409048	1.50538	1.33182	1.70156	5.97e-11	-1	H02AB Glucocorticoids	6.47e-10
p1yr	E	H02BX	3832	26	391287	1855	0.300566	1.35062	0.913612	1.99667	0.132	0	H02BX Corticosteroids for systemic use, combinations	0.243
p1yr	E	H03AA	3587	271	359009	34133	-0.259094	0.771751	0.67942	0.876629	6.74e-05	1	H03AA Thyroid hormones	0.000346
p1yr	E	J01AA	3550	308	376970	16172	0.577458	1.7815	1.57652	2.01315	2.08e-20	-1	J01AA Tetracyclines [DG:DG01197]	4.91e-19
p1yr	E	J01CA	3332	526	366276	26866	0.682942	1.97969	1.7987	2.1789	2.77e-44	-1	J01CA Penicillins with extended spectrum [DG:DG01780]	6.54e-42
p1yr	E	J01CE	3823	35	390434	2708	0.151579	1.16367	0.831194	1.62913	0.377	0	J01CE Beta-lactamase sensitive penicillins [DG:DG01778]	0.512
p1yr	E	J01CF	3589	269	380509	12633	0.722788	2.06017	1.81418	2.33951	7.97e-29	-1	J01CF Beta-lactamase resistant penicillins [DG:DG01779]	3.76e-27
p1yr	E	J01CR	3745	113	388192	4950	0.747811	2.11237	1.74275	2.56038	2.54e-14	-1	J01CR Combinations of penicillins, incl. beta-lactamase inhibitors	4.28e-13
p1yr	E	J01DB	3814	44	390749	2393	0.558829	1.74862	1.29069	2.36902	0.00031	-1	J01DB First-generation cephalosporins [DG:DG01774]	0.00138
p1yr	E	J01EA	3782	76	388287	4855	0.412504	1.5106	1.19767	1.90529	0.000496	-1	J01EA Trimethoprim and derivatives [DG:DG01581]	0.00209
p1yr	E	J01EE	3845	13	392714	428	0.912112	2.48958	1.42305	4.35541	0.00139	-1	J01EE Combinations of sulfonamides and trimethoprim, incl. derivatives	0.00513
p1yr	E	J01FA	3691	167	384061	9081	0.512113	1.66881	1.42191	1.95859	3.64e-10	-1	J01FA Macrolides [DG:DG01551]	3.44e-09
p1yr	E	J01FF	3843	15	392803	339	1.30156	3.67502	2.16928	6.22594	1.3e-06	-1	J01FF Lincosamides [DG:DG01578]	8.52e-06
p1yr	E	J01MA	3821	37	390677	2465	0.276962	1.31912	0.948836	1.8339	0.0994	0	J01MA Fluoroquinolones [DG:DG01549]	0.209
p1yr	E	J01XE	3541	317	374700	18442	0.630568	1.87868	1.6682	2.11571	2.46e-25	-1	J01XE Nitrofuran derivatives	7.26e-24
p1yr	E	J01XX	3851	7	392416	726	-0.062407	0.9395	0.444395	1.98621	0.87	0	J01XX Other antibacterials	0.925
p1yr	E	J02AC	3815	43	391058	2084	0.616722	1.85284	1.36312	2.51852	8.22e-05	-1	J02AC Triazole derivatives	0.000413
p1yr	E	J05AB	3808	50	389680	3462	0.351762	1.42157	1.07181	1.88547	0.0146	-1	J05AB Nucleosides and nucleotides excl. reverse transcriptase inhibitors [DG:DG02840]	0.0425
p1yr	E	J07AL	3840	18	391126	2016	-0.0732458	0.929372	0.583228	1.48095	0.758	0	J07AL Pneumococcal vaccines	0.852
p1yr	E	J07AP	3846	12	391750	1392	-0.10547	0.899902	0.508445	1.59275	0.717	0	J07AP Typhoid vaccines	0.821
p1yr	E	J07BB	3629	229	381898	11244	0.75209	2.12143	1.85144	2.43079	2.53e-27	-1	J07BB Influenza vaccines	8.53e-26
p1yr	E	J07BC	3852	6	392209	933	-0.453801	0.635209	0.28431	1.41919	0.269	0	J07BC Hepatitis vaccines	0.415
p1yr	E	J07CA	3831	27	390013	3129	-0.09005	0.913886	0.624458	1.33746	0.643	0	J07CA Bacterial and viral vaccines, combined	0.762
p1yr	E	L01BC	3845	13	390735	2407	-0.369865	0.690827	0.399852	1.19355	0.185	0	L01BC Pyrimidine analogues	0.309
p1yr	E	L02AE	3838	20	391341	1801	0.226697	1.25445	0.803224	1.95916	0.319	0	L02AE Gonadotropin releasing hormone analogues	0.463
p1yr	E	L02BA	3849	9	392078	1064	-0.144646	0.865329	0.447933	1.67167	0.667	0	L02BA Anti-estrogens	0.779
p1yr	E	L02BB	3851	7	392636	506	0.386707	1.47213	0.691796	3.13265	0.316	0	L02BB Anti-androgens	0.463
p1yr	E	L02BG	3819	39	389273	3869	0.162136	1.17602	0.85397	1.61952	0.321	0	L02BG Aromatase inhibitors [DG:DG01596]	0.463
p1yr	E	L04AA	3847	11	392453	689	0.269518	1.30933	0.716382	2.39307	0.381	0	L04AA Selective immunosuppressants	0.512
p1yr	E	L04AD	3853	5	392935	207	0.277879	1.32033	0.519819	3.3536	0.559	0	L04AD Calcineurin inhibitors	0.698
p1yr	E	L04AX	3813	45	388814	4328	0.0113609	1.01143	0.751371	1.36149	0.94	0	L04AX Other immunosuppressants	0.96
p1yr	E	M01AB	3833	25	391485	1657	0.323808	1.38238	0.9287	2.05769	0.111	0	M01AB Acetic acid derivatives and related substances	0.22
p1yr	E	M01AC	3853	5	392255	887	-0.628121	0.533593	0.221207	1.28713	0.162	0	M01AC Oxicams	0.279
p1yr	E	M01AE	3600	258	372778	20364	0.189372	1.20849	1.06315	1.3737	0.00377	-1	M01AE Propionic acid derivatives	0.0122
p1yr	E	M01AH	3840	18	391829	1313	0.220735	1.24699	0.78081	1.99151	0.355	0	M01AH Coxibs	0.494
p1yr	E	M02AA	3539	319	373860	19282	0.484963	1.62411	1.44076	1.8308	2.12e-15	-1	M02AA Antiinflammatory preparations, non-steroids for topical use	4.17e-14
p1yr	E	M03BA	3851	7	392985	157	1.16769	3.21456	1.48865	6.94143	0.00295	-1	M03BA Carbamic acid esters	0.00967
p1yr	E	M03BX	3838	20	392115	1027	0.392997	1.48141	0.945013	2.32228	0.0866	0	M03BX Other centrally acting agents	0.188
p1yr	E	M04AA	3727	131	382946	10196	0.0248188	1.02513	0.855009	1.2291	0.789	0	M04AA Preparations inhibiting uric acid production	0.871
p1yr	E	M04AC	3815	43	390923	2219	0.490805	1.63363	1.20089	2.22232	0.00177	-1	M04AC Preparations with no effect on uric acid metabolism	0.00618
p1yr	E	M05BA	3719	139	379446	13696	0.229622	1.25812	1.0572	1.49724	0.0097	-1	M05BA Bisphosphonates [DG:DG01600]	0.0301
p1yr	E	M05BX	3850	8	392301	841	0.258476	1.29495	0.642997	2.60796	0.469	0	M05BX Other drugs affecting bone structure and mineralization	0.608
p1yr	E	N01BB	3798	60	389255	3887	0.408417	1.50443	1.16115	1.9492	0.002	-1	N01BB Amides	0.00684
p1yr	E	N01BX	3848	10	392299	843	0.0269727	1.02734	0.548913	1.92276	0.933	0	N01BX Other local anesthetics	0.96
p1yr	E	N02AA	3717	141	387416	5726	0.626664	1.87136	1.56514	2.23749	6.27e-12	-1	N02AA Natural opium alkaloids	9.25e-11
p1yr	E	N02AB	3842	16	392557	585	0.55567	1.74311	1.04899	2.89651	0.032	-1	N02AB Phenylpiperidine derivatives	0.0812
p1yr	E	N02AE	3810	48	391173	1969	0.586862	1.79834	1.33765	2.41769	0.000102	-1	N02AE Oripavine derivatives	0.000501
p1yr	E	N02AJ	3501	357	369619	23523	0.315206	1.37054	1.22372	1.53497	4.97e-08	-1	N02AJ Opioids in combination with non-opioid analgesics	4.04e-07
p1yr	E	N02AX	3753	105	386054	7088	0.0899782	1.09415	0.894982	1.33764	0.38	0	N02AX Other opioids	0.512
p1yr	E	N02BA	3852	6	392835	307	0.5904	1.80471	0.799757	4.07246	0.155	0	N02BA Salicylic acid and derivatives	0.271
p1yr	E	N02BE	3041	817	343710	49432	0.502269	1.65247	1.51583	1.80142	3.94e-30	-1	N02BE Anilides	2.32e-28
p1yr	E	N02BG	3843	15	392568	574	0.740749	2.09751	1.24873	3.52322	0.00512	-1	N02BG Other analgesics and antipyretics	0.0163
p1yr	E	N02CC	3806	52	388010	5132	-0.0130657	0.987019	0.747749	1.30285	0.926	0	N02CC Selective serotonin (5HT1) agonists [DG:DG01943]	0.96
p1yr	E	N02CX	3850	8	392086	1056	-0.547256	0.578535	0.286717	1.16736	0.127	0	N02CX Other antimigraine preparations	0.243
p1yr	E	N03AB	3848	10	392648	494	0.565698	1.76068	0.932302	3.32508	0.0812	0	N03AB Hydantoin derivatives	0.18
p1yr	E	N03AE	3843	15	392419	723	0.430701	1.53834	0.912303	2.59396	0.106	0	N03AE Benzodiazepine derivatives	0.216
p1yr	E	N03AF	3840	18	391462	1680	-0.109408	0.896365	0.560885	1.4325	0.647	0	N03AF Carboxamide derivatives	0.762
p1yr	E	N03AG	3835	23	391816	1326	0.125235	1.13341	0.741714	1.73197	0.563	0	N03AG Fatty acid derivatives	0.699
p1yr	E	N03AX	3593	265	376275	16867	0.21416	1.23882	1.08534	1.41401	0.00151	-1	N03AX Other antiepileptics	0.00548
p1yr	E	N04BA	3818	40	390648	2494	0.527005	1.69385	1.23035	2.33196	0.00123	-1	N04BA Dopa and dopa derivatives	0.00468
p1yr	E	N04BB	3853	5	392894	248	0.729259	2.07354	0.851352	5.05031	0.108	0	N04BB Adamantane derivatives	0.216
p1yr	E	N04BC	3830	28	391402	1740	0.443703	1.55847	1.06719	2.27591	0.0216	-1	N04BC Dopamine agonists	0.0575
p1yr	E	N04BD	3850	8	392557	585	0.440261	1.55311	0.768994	3.13678	0.22	0	N04BD Monoamine oxidase B inhibitors	0.348
p1yr	E	N05AB	3793	65	388165	4977	0.256891	1.2929	1.00798	1.65837	0.0431	-1	N05AB Phenothiazines with piperazine structure	0.104
p1yr	E	N05AD	3848	10	392921	221	1.22587	3.40712	1.77549	6.53818	0.000228	-1	N05AD Butyrophenone derivatives [DG:DG01940]	0.00103
p1yr	E	N05AH	3829	29	391546	1596	0.190467	1.20981	0.830564	1.76224	0.321	0	N05AH Diazepines, oxazepines and thiazepines	0.463
p1yr	E	N05AN	3852	6	392548	594	-0.197622	0.82068	0.365064	1.84493	0.632	0	N05AN Lithium	0.757
p1yr	E	N05AX	3819	39	392299	843	0.951763	2.59027	1.84402	3.63852	4.03e-08	-1	N05AX Other antipsychotics	3.4e-07
p1yr	E	N05BA	3720	138	387526	5616	0.762694	2.14405	1.79696	2.55818	2.58e-17	-1	N05BA Benzodiazepine derivatives [DG:DG01914]	5.54e-16
p1yr	E	N05BB	3848	10	392533	609	0.319908	1.377	0.731623	2.59168	0.322	0	N05BB Diphenylmethane derivatives	0.463
p1yr	E	N05CD	3801	57	391787	1355	1.36949	3.93335	2.98503	5.18296	2.27e-22	-1	N05CD Benzodiazepine derivatives	5.95e-21
p1yr	E	N05CF	3762	96	386905	6237	0.358164	1.4307	1.16289	1.76018	0.000706	-1	N05CF Benzodiazepine related drugs	0.00282
p1yr	E	N05CH	3848	10	392576	566	0.333371	1.39566	0.739434	2.63428	0.304	0	N05CH Melatonin receptor agonists	0.454
p1yr	E	N06AA	3602	256	371462	21680	0.0701845	1.07271	0.940675	1.22327	0.295	0	N06AA Non-selective monoamine reuptake inhibitors [DG:DG01730]	0.443
p1yr	E	N06AB	3472	386	363943	29199	0.0895369	1.09367	0.974281	1.22768	0.129	0	N06AB Selective serotonin reuptake inhibitors	0.243
p1yr	E	N06AX	3664	194	381788	11354	0.253177	1.28811	1.10302	1.50426	0.00138	-1	N06AX Other antidepressants	0.00513
p1yr	E	N06DA	3789	69	391006	2136	0.950571	2.58719	1.96335	3.40924	1.46e-11	-1	N06DA Anticholinesterases	1.72e-10
p1yr	E	N06DX	3792	66	392134	1008	1.63601	5.13463	3.84037	6.86506	2.47e-28	-1	N06DX Other anti-dementia drugs	9.72e-27
p1yr	E	N07BA	3850	8	392563	579	0.0342845	1.03488	0.511424	2.0941	0.924	0	N07BA Drugs used in nicotine dependence	0.96
p1yr	E	N07BC	3852	6	393025	117	1.10204	3.01029	1.28441	7.0553	0.0112	-1	N07BC Drugs used in opioid dependence	0.0343
p1yr	E	N07CA	3802	56	389008	4134	0.23231	1.26151	0.964472	1.65003	0.0899	0	N07CA Antivertigo preparations	0.193
p1yr	E	P01AB	3816	42	391444	1698	0.833676	2.30176	1.6869	3.14074	1.46e-07	-1	P01AB Nitroimidazole derivatives	1.04e-06
p1yr	E	P01BA	3837	21	391238	1904	0.0325544	1.03309	0.66973	1.59359	0.883	0	P01BA Aminoquinolines	0.934
p1yr	E	P01BC	3801	57	388653	4489	0.0623056	1.06429	0.813607	1.3922	0.649	0	P01BC Methanolquinolines	0.762
p1yr	E	P03AC	3851	7	392826	316	0.571306	1.77058	0.827789	3.78713	0.141	0	P03AC Pyrethrines, incl. synthetic compounds	0.254
p1yr	E	R01AC	3849	9	392540	602	0.376026	1.45649	0.75219	2.82023	0.265	0	R01AC Antiallergic agents, excl. corticosteroids	0.414
p1yr	E	R01AD	3583	275	367822	25320	0.067884	1.07024	0.944007	1.21336	0.289	0	R01AD Corticosteroids	0.437
p1yr	E	R01AX	3849	9	392641	501	0.545626	1.72569	0.889044	3.34966	0.107	0	R01AX Other nasal preparations	0.216
p1yr	E	R02AX	3851	7	392807	335	0.688576	1.99088	0.937101	4.22964	0.0733	0	R02AX Other throat preparetions	0.165
p1yr	E	R03AC	3358	500	354667	38475	0.139844	1.15009	1.02381	1.29195	0.0185	-1	R03AC Selective beta-2-adrenoreceptor agonists	0.0526
p1yr	E	R03AK	3601	257	372482	20660	0.0255052	1.02583	0.885958	1.18779	0.733	0	R03AK Adrenergics in combination with corticosteroids or other drugs, excl. anticholinergics	0.832
p1yr	E	R03AL	3815	43	390049	3093	0.0857364	1.08952	0.793654	1.49568	0.596	0	R03AL Adrenergics in combination with anticholinergics incl. triple combinations with corticosteroids	0.727
p1yr	E	R03BA	3696	162	378273	14869	0.0196543	1.01985	0.861851	1.20681	0.819	0	R03BA Glucocorticoids	0.891
p1yr	E	R03BB	3772	86	386934	6208	0.0433362	1.04429	0.826146	1.32003	0.717	0	R03BB Anticholinergics	0.821
p1yr	E	R03DA	3848	10	392614	528	0.112784	1.11939	0.589888	2.12419	0.73	0	R03DA Xanthines	0.832
p1yr	E	R03DC	3821	37	389572	3570	-0.281096	0.754956	0.540629	1.05425	0.099	0	R03DC Leukotriene receptor antagonists	0.209
p1yr	E	R05CB	3801	57	389370	3772	0.153398	1.16579	0.883659	1.538	0.278	0	R05CB Mucolytics	0.426
p1yr	E	R05DA	3668	190	381378	11764	0.411302	1.50878	1.29933	1.75199	6.9e-08	-1	R05DA Opium alkaloids and derivatives	5.25e-07
p1yr	E	R06AB	3839	19	392038	1104	0.346995	1.41481	0.893055	2.24139	0.139	0	R06AB Substituted alkylamines	0.252
p1yr	E	R06AD	3836	22	391969	1173	0.389858	1.47677	0.964313	2.26156	0.073	0	R06AD Phenothiazine derivatives	0.165
p1yr	E	R06AE	3688	170	383627	9515	0.47011	1.60017	1.36436	1.87674	7.5e-09	-1	R06AE Piperazine derivatives	6.56e-08
p1yr	E	R06AX	3727	131	381954	11188	0.0424989	1.04341	0.873016	1.24707	0.64	0	R06AX Other antihistamines for systemic use	0.762
p1yr	E	S01AA	3788	70	388835	4307	0.462066	1.58735	1.24792	2.01911	0.000167	-1	S01AA Antibiotics	0.000773
p1yr	E	S01AE	3853	5	392790	352	0.315899	1.37149	0.565547	3.32597	0.485	0	S01AE Fluoroquinolones	0.625
p1yr	E	S01BA	3842	16	391295	1847	-0.133322	0.875183	0.53346	1.43581	0.598	0	S01BA Corticosteroids, plain	0.727
p1yr	E	S01CA	3851	7	392739	403	0.599407	1.82104	0.855655	3.87561	0.12	0	S01CA Corticosteroids and antiinfectives in combination	0.232
p1yr	E	S01EC	3835	23	389719	3423	-0.30765	0.735173	0.486372	1.11124	0.144	0	S01EC Carbonic anhydrase inhibitors	0.257
p1yr	E	S01ED	3824	34	388022	5120	-0.250311	0.778559	0.554074	1.09399	0.149	0	S01ED Beta blocking agents	0.264
p1yr	E	S01EE	3789	69	384759	8383	-0.101591	0.903399	0.710041	1.14941	0.408	0	S01EE Prostaglandin analogues	0.541
p1yr	E	S01GX	3829	29	390640	2502	0.00751985	1.00755	0.695438	1.45973	0.968	0	S01GX Other antiallergics	0.978
p1yr	E	S01XA	3669	189	371393	21749	-0.124396	0.88303	0.75958	1.02654	0.105	0	S01XA Other ophthalmologicals	0.215
p1yr	E	S02AA	3840	18	391880	1262	0.323195	1.38153	0.864814	2.20699	0.176	0	S02AA Antiinfectives	0.299
p1yr	E	S02CA	3837	21	392018	1124	0.531779	1.70196	1.10139	2.63	0.0166	-1	S02CA Corticosteroids and antiinfectives in combination	0.0478
p1yr	E	S03BA	3850	8	392050	1092	-0.282183	0.754135	0.375558	1.51433	0.428	0	S03BA Corticosteroids	0.558
p1yr	E	V03AE	3846	12	393007	135	1.49102	4.44161	2.35055	8.39289	4.39e-06	-1	V03AE Drugs for treatment of hyperkalemia and hyperphosphatemia	2.59e-05
p1yr	E	V06DC	3843	15	392811	331	0.965121	2.6251	1.53234	4.49717	0.000442	-1	V06DC Carbohydrates	0.0019
p1yr	E	V07AY	3682	176	381878	11264	0.118624	1.12595	0.955483	1.32682	0.157	0	V07AY Other non-therapeutic auxiliary products	0.272
p1yr	F	A01AB	3732	126	26111	866	0.0683131	1.0707	0.881893	1.29993	0.49	0	A01AB Antiinfectives and antiseptics for local oral treatment	0.723
p1yr	F	A01AD	3826	32	26749	228	-0.0124384	0.987639	0.675634	1.44373	0.949	0	A01AD Other agents for local oral treatment	0.964
p1yr	F	A02BA	3761	97	25933	1044	-0.325689	0.72203	0.582162	0.895501	0.00303	1	A02BA H2-receptor antagonists [DG:DG01481]	0.0358
p1yr	F	A02BC	2610	1248	15851	11126	-0.268917	0.764207	0.708077	0.824787	4.96e-12	1	A02BC Proton pump inhibitors [DG:DG01646]	5.85e-10
p1yr	F	A02BX	3715	143	25792	1185	-0.0287697	0.97164	0.810271	1.16515	0.756	0	A02BX Other drugs for peptic ulcer and gastro-oesophageal reflux disease (GORD)	0.875
p1yr	F	A03AA	3811	47	26510	467	-0.284771	0.752187	0.553473	1.02224	0.0688	0	A03AA Synthetic anticholinergics, esters with tertiary amino group	0.242
p1yr	F	A03AX	3839	19	26743	234	-0.447045	0.639515	0.397958	1.02769	0.0647	0	A03AX Other drugs for functional gastrointestinal disorders	0.235
p1yr	F	A03BB	3781	77	26410	567	0.0209772	1.0212	0.798137	1.3066	0.868	0	A03BB Belladonna alkaloids, semisynthetic, quaternary ammonium compounds	0.927
p1yr	F	A03FA	3821	37	26543	434	-0.464628	0.628369	0.446023	0.885262	0.00789	1	A03FA Propulsives [DG:DG01763]	0.0653
p1yr	F	A04AA	3850	8	26845	132	-0.737399	0.478357	0.232777	0.983024	0.0448	1	A04AA Serotonin (5HT3) antagonists	0.195
p1yr	F	A05AA	3851	7	26914	63	-0.161203	0.851119	0.385297	1.88012	0.69	0	A05AA Bile acid and derivatives [DG:DG01956]	0.831
p1yr	F	A06AA	3753	105	26198	779	0.0960674	1.10083	0.890091	1.36147	0.376	0	A06AA Softeners, emollients	0.634
p1yr	F	A06AB	3665	193	25854	1123	0.349452	1.41829	1.20397	1.67076	2.91e-05	-1	A06AB Contact laxatives	0.00114
p1yr	F	A06AC	3839	19	26702	275	-0.500508	0.606222	0.377883	0.972538	0.0379	1	A06AC Bulk-forming laxatives	0.172
p1yr	F	A06AD	3494	364	23975	3002	0.00705999	1.00708	0.893653	1.13491	0.908	0	A06AD Osmotically acting laxatives	0.96
p1yr	F	A06AG	3841	17	26885	92	0.405995	1.5008	0.881666	2.5547	0.135	0	A06AG Enemas	0.358
p1yr	F	A06AX	3844	14	26777	200	-0.579858	0.559978	0.322702	0.971718	0.0392	1	A06AX Other drugs for constipation	0.175
p1yr	F	A07AA	3804	54	26568	409	0.0356555	1.0363	0.773451	1.38847	0.811	0	A07AA Antibiotics	0.895
p1yr	F	A07DA	3787	71	26312	665	-0.12254	0.884671	0.687445	1.13848	0.341	0	A07DA Antipropulsives	0.624
p1yr	F	A07EC	3820	38	26606	371	-0.270154	0.763262	0.543342	1.0722	0.119	0	A07EC Aminosalicylic acid and similar agents	0.334
p1yr	F	A08AB	3848	10	26918	59	-0.212222	0.808785	0.407188	1.60647	0.544	0	A08AB Peripherally acting antiobesity products	0.742
p1yr	F	A09AA	3853	5	26808	169	-1.43341	0.238495	0.0977756	0.581737	0.00163	1	A09AA Enzyme preparations	0.0226
p1yr	F	A09AB	3847	11	26952	25	1.2133	3.36458	1.62511	6.96592	0.00109	-1	A09AB Acid preparations	0.0171
p1yr	F	A10AB	3690	168	25757	1220	-0.0730485	0.929556	0.763278	1.13206	0.468	0	A10AB Insulins and analogues for injection, fast-acting	0.699
p1yr	F	A10AC	3838	20	26812	165	-0.185415	0.83076	0.512611	1.34637	0.452	0	A10AC Insulins and analogues for injection, intermediate-acting	0.693
p1yr	F	A10AD	3816	42	26726	251	0.216145	1.24128	0.874714	1.76147	0.226	0	A10AD Insulins and analogues for injection, intermediate- or long-acting combined with fast-acting	0.494
p1yr	F	A10AE	3821	37	26578	399	-0.542149	0.581497	0.406947	0.830918	0.00291	1	A10AE Insulins and analogues for injection, long-acting	0.0358
p1yr	F	A10BA	3545	313	24875	2102	0.0404693	1.0413	0.891951	1.21565	0.608	0	A10BA Biguanides [DG:DG01684]	0.778
p1yr	F	A10BB	3761	97	26271	706	-0.0618628	0.940012	0.740943	1.19256	0.61	0	A10BB Sulfonylureas	0.778
p1yr	F	A10BD	3847	11	26945	32	0.682284	1.97839	0.970685	4.03224	0.0604	0	A10BD Combinations of oral blood glucose lowering drugs	0.226
p1yr	F	A10BG	3848	10	26912	65	0.0982853	1.10328	0.556577	2.18698	0.778	0	A10BG Thiazolidinediones [DG:DG01683]	0.882
p1yr	F	A10BH	3770	88	26358	619	0.0232242	1.0235	0.800042	1.30936	0.853	0	A10BH Dipeptidyl peptidase 4 (DPP-4) inhibitors [DG:DG01601]	0.915
p1yr	F	A10BJ	3830	28	26791	186	-0.197089	0.821118	0.540672	1.24703	0.355	0	A10BJ Glucagon-like peptide-1 receptor (GLP-1) analogues	0.632
p1yr	F	A10BK	3801	57	26677	300	0.0490295	1.05025	0.775057	1.42316	0.752	0	A10BK Sodium-glucose co-transporter 2 (SGLT2) inhibitors	0.874
p1yr	F	A11CC	3714	144	25914	1063	-0.00898833	0.991052	0.824323	1.1915	0.924	0	A11CC Vitamin D and analogues	0.96
p1yr	F	A11DA	3817	41	26666	311	-0.0629542	0.938986	0.66984	1.31628	0.715	0	A11DA Vitamin B1, plain	0.844
[truncated: 3,720 more rows]
