# Supplementary material for: Exploring Drugs and Vaccines Associated with Altered Risks and Severity of COVID-19: A UK Biobank Cohort Study of All ATC Level-4 Drug Categories Reveals Repositioning Opportunities
Source: Pharmaceutics. 2021 Sep 18;13(9):1514. doi: 10.3390/pharmaceutics13091514 (PMC8471264; doi:10.3390/pharmaceutics13091514)
Supplement: Supplementary file 1 [file pharmaceutics-13-01514-s001.zip › TableS10_proportion of subjects in each subgroup.xlsx]

## Sheet: Porportion of the subgroup
Table Number and proportion of subjects falling in each subgroup
Model	Cohort 1	Cohort 2	Total
A	1318	2540	3858
B	170	3688	3858
C	1318	393142	394460
D	170	393142	393312
E	3858	393142	397000
F	3858	26977	30835
G	1318	26977	28295
H	170	26977	27147
										Proportion of the population falling in the subgroup
	Age Over 70				Age below 70					Age Over 70		Age below 70
Model	Cohort 1	Cohort 2	Total		Cohort 1	Cohort 2	Total
A	747	782	1529		571	1758	2329			0.396319		0.603681
B	148	1381	1529		22	2307	2329			0.396319		0.603681
C	747	193714	194461		571	199428	199999			0.49298		0.50702
D	148	193714	193862		22	199428	199450			0.492896		0.507104
E	1529	193714	195243		2329	199428	201757			0.491796		0.508204
F	1529	15945	17474		2329	11032	13361			0.566694		0.433306
G	747	15945	16692		571	11032	11603			0.589928		0.410072
H	148	15945	16093		22	11032	11054			0.59281		0.40719
	Asthma				No Asthma					Asthma		No Asthma
Model	Cohort 1	Cohort 2	Total		Cohort 1	Cohort 2	Total
A	232	408	640		1086	2132	3218			0.165889		0.834111
B	17	623	640		153	3065	3218			0.165889		0.834111
C	232	55471	55703		1086	337671	338757			0.141213		0.858787
D	17	55471	55488		153	337671	337824			0.141079		0.858921
E	640	55471	56111		3218	337671	340889			0.141338		0.858662
F	640	4621	5261		3218	22356	25574			0.170618		0.829382
G	232	4621	4853		1086	22356	23442			0.171514		0.828486
H	17	4621	4638		153	22356	22509			0.170848		0.829152
	BMI over 30				BMI Below 30					BMI over 30		BMI Below 30
Model	Cohort 1	Cohort 2	Total		Cohort 1	Cohort 2	Total
A	484	738	1222		834	1802	2636			0.316744		0.683256
B	70	1152	1222		100	2536	2636			0.316744		0.683256
C	484	94370	94854		834	298772	299606			0.240465		0.759535
D	70	94370	94440		100	298772	298872			0.240115		0.759885
E	1222	94370	95592		2636	298772	301408			0.240786		0.759214
F	1222	7855	9077		2636	19122	21758			0.294373		0.705627
G	484	7855	8339		834	19122	19956			0.294716		0.705284
H	70	7855	7925		100	19122	19222			0.291929		0.708071
	CAD				No CAD					CAD		No CAD
Model	Cohort 1	Cohort 2	Total		Cohort 1	Cohort 2	Total
A	241	204	445		1077	2336	3413			0.115345		0.884655
B	42	403	445		128	3285	3413			0.115345		0.884655
C	241	30813	31054		1077	362329	363406			0.0787253		0.921275
D	42	30813	30855		128	362329	362457			0.0784492		0.921551
E	445	30813	31258		3413	362329	365742			0.0787355		0.921264
F	445	3758	4203		3413	23219	26632			0.136306		0.863694
G	241	3758	3999		1077	23219	24296			0.141332		0.858668
H	42	3758	3800		128	23219	23347			0.139979		0.860021
	Dementia				No dementia					Dementia		No dementia
Model	Cohort 1	Cohort 2	Total		Cohort 1	Cohort 2	Total
A	38	36	74		1280	2504	3784			0.0191809		0.980819
B	17	57	74		153	3631	3784			0.0191809		0.980819
C	38	814	852		1280	392328	393608			0.00215991		0.99784
D	17	814	831		153	392328	392481			0.00211283		0.997887
E	74	814	888		3784	392328	396112			0.00223678		0.997763
F	74	195	269		3784	26782	30566			0.00872385		0.991276
G	38	195	233		1280	26782	28062			0.00823467		0.991765
H	17	195	212		153	26782	26935			0.00780933		0.992191
	COPD				No COPD					COPD		No COPD
Model	Cohort 1	Cohort 2	Total		Cohort 1	Cohort 2	Total
A	108	108	216		1210	2432	3642			0.0559876		0.944012
B	17	199	216		153	3489	3642			0.0559876		0.944012
C	108	13070	13178		1210	380072	381282			0.0334077		0.966592
D	17	13070	13087		153	380072	380225			0.0332738		0.966726
E	216	13070	13286		3642	380072	383714			0.033466		0.966534
F	216	1757	1973		3642	25220	28862			0.0639857		0.936014
G	108	1757	1865		1210	25220	26430			0.0659127		0.934087
H	17	1757	1774		153	25220	25373			0.0653479		0.934652
	Depression				No Depression					Depression		No Depression
Model	Cohort 1	Cohort 2	Total		Cohort 1	Cohort 2	Total
A	187	260	447		1131	2280	3411			0.115863		0.884137
B	21	426	447		149	3262	3411			0.115863		0.884137
C	187	32718	32905		1131	360424	361555			0.0834178		0.916582
D	21	32718	32739		149	360424	360573			0.0832393		0.916761
E	447	32718	33165		3411	360424	363835			0.083539		0.916461
F	447	3181	3628		3411	23796	27207			0.117659		0.882341
G	187	3181	3368		1131	23796	24927			0.119032		0.880968
H	21	3181	3202		149	23796	23945			0.11795		0.88205
	DM				No DM					DM		No DM
Model	Cohort 1	Cohort 2	Total		Cohort 1	Cohort 2	Total
A	235	199	434		1083	2341	3424			0.112494		0.887506
B	38	396	434		132	3292	3424			0.112494		0.887506
C	235	27853	28088		1083	365289	366372			0.0712062		0.928794
D	38	27853	27891		132	365289	365421			0.0709132		0.929087
E	434	27853	28287		3424	365289	368713			0.0712519		0.928748
F	434	3153	3587		3424	23824	27248			0.116329		0.883671
G	235	3153	3388		1083	23824	24907			0.119738		0.880262
H	38	3153	3191		132	23824	23956			0.117545		0.882455
	Dx_cancer				No Dx_cancer					Dx_cancer		No Dx_cancer
Model	Cohort 1	Cohort 2	Total		Cohort 1	Cohort 2	Total
A	112	147	259		1206	2393	3599			0.0671332		0.932867
B	18	241	259		152	3447	3599			0.0671332		0.932867
C	112	30184	30296		1206	362958	364164			0.0768037		0.923196
D	18	30184	30202		152	362958	363110			0.0767889		0.923211
E	259	30184	30443		3599	362958	366557			0.0766826		0.923317
F	259	2768	3027		3599	24209	27808			0.0981677		0.901832
G	112	2768	2880		1206	24209	25415			0.101785		0.898215
H	18	2768	2786		152	24209	24361			0.102626		0.897374
	Hypertension				No Hypertension					Hypertension		No Hypertension
Model	Cohort 1	Cohort 2	Total		Cohort 1	Cohort 2	Total
A	664	808	1472		654	1732	2386			0.381545		0.618455
B	116	1356	1472		54	2332	2386			0.381545		0.618455
C	664	129708	130372		654	263434	264088			0.330508		0.669492
D	116	129708	129824		54	263434	263488			0.330079		0.669921
E	1472	129708	131180		2386	263434	265820			0.330428		0.669572
F	1472	11813	13285		2386	15164	17550			0.430842		0.569158
G	664	11813	12477		654	15164	15818			0.440961		0.559039
H	116	11813	11929		54	15164	15218			0.439422		0.560578
	Male				Female					Male		Female
Model	Cohort 1	Cohort 2	Total		Cohort 1	Cohort 2	Total
A	731	1188	1919		587	1352	1939			0.497408		0.502592
B	110	1809	1919		60	1879	1939			0.497408		0.502592
C	731	175522	176253		587	217620	218207			0.446821		0.553179
D	110	175522	175632		60	217620	217680			0.446546		0.553454
E	1919	175522	177441		1939	217620	219559			0.446955		0.553045
F	1919	12669	14588		1939	14308	16247			0.473099		0.526901
G	731	12669	13400		587	14308	14895			0.473582		0.526418
H	110	12669	12779		60	14308	14368			0.470733		0.529267
	Ethnic White				Ethnic Non-White					Ethnic White		Ethnic Non-White
Model	Cohort 1	Cohort 2	Total		Cohort 1	Cohort 2	Total
A	1150	2343	3493		168	197	365			0.905391		0.0946086
B	156	3337	3493		14	351	365			0.905391		0.0946086
C	1150	368053	369203		168	25089	25257			0.935971		0.0640293
D	156	368053	368209		14	25089	25103			0.936175		0.0638246
E	3493	368053	371546		365	25089	25454			0.935884		0.0641159
F	3493	25169	28662		365	1808	2173			0.929528		0.0704719
G	1150	25169	26319		168	1808	1976			0.930164		0.0698357
H	156	25169	25325		14	1808	1822			0.932884		0.0671161
