# Supplementary material for: Exploring Drugs and Vaccines Associated with Altered Risks and Severity of COVID-19: A UK Biobank Cohort Study of All ATC Level-4 Drug Categories Reveals Repositioning Opportunities
Source: Pharmaceutics. 2021 Sep 18;13(9):1514. doi: 10.3390/pharmaceutics13091514 (PMC8471264; doi:10.3390/pharmaceutics13091514)
Supplement: Supplementary file 1 [file pharmaceutics-13-01514-s001.zip › TableS11-Full_results_subgroup_analysis_selected18Drugs-fdr_12Jan.xlsx]

## Sheet: TableS15-Full_results_subgroup_
Subgp	Model	Windows	drug	beta_Y	beta_N	sig_Y	sig_N	z_OR_cmp	p_OR_cmp	sig_OR_cmp	Full name	p.adjust_OR_cmp
AGE>70	A	p6m	A02BC	-0.125759	-0.0353993	0	0	-0.48666	0.626	0	A02BC Proton pump inhibitors [DG:DG01646]	0.876
AGE>70	A	p6m	A03AA	0.485062	-0.0827202	0	0	0.641343	0.521	0	A03AA Synthetic anticholinergics, esters with tertiary amino group	0.876
AGE>70	A	p6m	A10AE	0.264122	1.00457	0	0	-0.639924	0.522	0	A10AE Insulins and analogues for injection, long-acting	0.876
AGE>70	A	p6m	A10BA	-0.553369	-0.214827	0	0	-0.86639	0.386	0	A10BA Biguanides [DG:DG01684]	0.876
AGE>70	A	p6m	B01AC	-0.0669637	-0.588184	0	1	1.67657	0.0936	0	B01AC Platelet aggregation inhibitors excl. heparin	0.655
AGE>70	A	p6m	C07AB	0.0888672	-0.145393	0	0	0.804094	0.421	0	C07AB Beta blocking AGE>70nts, selective	0.876
AGE>70	A	p6m	C08CA	-0.22189	-0.251625	0	0	0.124419	0.901	0	C08CA Dihydropyridine derivatives [DG:DG01928]	0.963
AGE>70	A	p6m	C09AA	-0.434902	-0.354297	1	1	-0.31694	0.751	0	C09AA ACE inhibitors, plain [DG:DG01501]	0.876
AGE>70	A	p6m	C09CA	-0.168612	-0.381866	0	0	0.668632	0.504	0	C09CA Angiotensin II receptor blockers, plain [DG:DG01495]	0.876
AGE>70	A	p6m	C10AA	-0.613895	-0.541421	1	1	-0.368016	0.713	0	C10AA HMG CoA reductase inhibitors [DG:DG01660]	0.876
AGE>70	A	p6m	G03CA	0.815824	-0.191739	0	0	1.91713	0.0552	0	G03CA Natural and semisynthetic estrogens, plain	0.655
AGE>70	A	p6m	G04CB	-0.367656	-0.767378	0	0	0.407734	0.683	0	G04CB Testosterone-5-alpha reductase inhibitors	0.876
AGE>70	A	p6m	H03AA	-0.461399	-0.152165	0	0	-0.940902	0.347	0	H03AA Thyroid hormones	0.876
AGE>70	A	p6m	R03BA	-0.818267	-12.2653	1	0	0.0466797	0.963	0	R03BA Glucocorticoids	0.963
AGE>70	B	p6m	A02BC	0.206115	0.581083	0	0	-0.692394	0.489	0	A02BC Proton pump inhibitors [DG:DG01646]	1
AGE>70	B	p6m	A03AA	-14.0407	-16.3805	0	0	0.000592041	1	0	A03AA Synthetic anticholinergics, esters with tertiary amino group	1
AGE>70	B	p6m	A10AE	0.975712	1.21421	0	0	-0.109291	0.913	0	A10AE Insulins and analogues for injection, long-acting	1
AGE>70	B	p6m	A10BA	-0.307469	-0.4055	0	0	0.0789931	0.937	0	A10BA Biguanides [DG:DG01684]	1
AGE>70	B	p6m	B01AC	0.000157837	0.230099	0	0	-0.257523	0.797	0	B01AC Platelet aggregation inhibitors excl. heparin	1
AGE>70	B	p6m	C07AB	0.411081	1.44043	0	-1	-1.56814	0.117	0	C07AB Beta blocking AGE>70nts, selective	0.819
AGE>70	B	p6m	C08CA	-0.162913	0.429209	0	0	-0.92387	0.356	0	C08CA Dihydropyridine derivatives [DG:DG01928]	1
AGE>70	B	p6m	C09AA	-0.0725857	-0.229119	0	0	0.196376	0.844	0	C09AA ACE inhibitors, plain [DG:DG01501]	1
AGE>70	B	p6m	C09CA	0.175734	-1.01368	0	0	1.06815	0.285	0	C09CA Angiotensin II receptor blockers, plain [DG:DG01495]	1
AGE>70	B	p6m	C10AA	-0.181317	0.734661	0	0	-1.65802	0.0973	0	C10AA HMG CoA reductase inhibitors [DG:DG01660]	0.819
AGE>70	B	p6m	G03CA	-0.156602	-15.6444	0	0	0.00947098	0.992	0	G03CA Natural and semisynthetic estrogens, plain	1
AGE>70	B	p6m	G04CB	-0.757665	-16.3675	0	0	0.00261209	0.998	0	G04CB Testosterone-5-alpha reductase inhibitors	1
AGE>70	B	p6m	H03AA	0.541881	0.194697	0	0	0.389754	0.697	0	H03AA Thyroid hormones	1
AGE>70	B	p6m	R03BA	-0.896074	-15.0707	0	0	0.00177483	0.999	0	R03BA Glucocorticoids	1
AGE>70	C	p6m	A02BC	0.194958	0.405502	-1	-1	-1.4465	0.148	0	A02BC Proton pump inhibitors [DG:DG01646]	0.829
AGE>70	C	p6m	A03AA	0.432865	0.237358	0	0	0.304593	0.761	0	A03AA Synthetic anticholinergics, esters with tertiary amino group	0.86
AGE>70	C	p6m	A10AE	0.318668	0.0100452	0	0	0.485847	0.627	0	A10AE Insulins and analogues for injection, long-acting	0.86
AGE>70	C	p6m	A10BA	-0.135462	0.047485	0	0	-0.653472	0.513	0	A10BA Biguanides [DG:DG01684]	0.86
AGE>70	C	p6m	B01AC	0.171825	-0.252609	0	0	1.69535	0.09	0	B01AC Platelet aggregation inhibitors excl. heparin	0.829
AGE>70	C	p6m	C07AB	-0.00262003	0.0830637	0	0	-0.371836	0.71	0	C07AB Beta blocking AGE>70nts, selective	0.86
AGE>70	C	p6m	C08CA	-0.10213	0.0378908	0	0	-0.752488	0.452	0	C08CA Dihydropyridine derivatives [DG:DG01928]	0.86
AGE>70	C	p6m	C09AA	-0.382782	-0.158228	1	0	-1.12589	0.26	0	C09AA ACE inhibitors, plain [DG:DG01501]	0.829
AGE>70	C	p6m	C09CA	-0.144937	-0.081363	0	0	-0.255086	0.799	0	C09CA Angiotensin II receptor blockers, plain [DG:DG01495]	0.86
AGE>70	C	p6m	C10AA	-0.263669	-0.180223	1	0	-0.536904	0.591	0	C10AA HMG CoA reductase inhibitors [DG:DG01660]	0.86
AGE>70	C	p6m	G03CA	0.508914	0.114501	0	0	1.04609	0.296	0	G03CA Natural and semisynthetic estrogens, plain	0.829
AGE>70	C	p6m	G04CB	-0.252852	-0.65195	0	0	0.485553	0.627	0	G04CB Testosterone-5-alpha reductase inhibitors	0.86
AGE>70	C	p6m	H03AA	-0.356107	-0.0122663	0	0	-1.31156	0.19	0	H03AA Thyroid hormones	0.829
AGE>70	C	p6m	R03BA	0.177465	0.242774	0	0	-0.155198	0.877	0	R03BA Glucocorticoids	0.877
AGE>70	D	p6m	A02BC	0.351799	0.996664	0	-1	-1.19951	0.23	0	A02BC Proton pump inhibitors [DG:DG01646]	0.805
AGE>70	D	p6m	A03AA	-13.0867	-14.5937	0	0	0.000627454	0.999	0	A03AA Synthetic anticholinergics, esters with tertiary amino group	0.999
AGE>70	D	p6m	A10AE	0.895261	1.63913	0	0	-0.424732	0.671	0	A10AE Insulins and analogues for injection, long-acting	0.999
AGE>70	D	p6m	A10BA	-0.200345	-0.325729	0	0	0.102891	0.918	0	A10BA Biguanides [DG:DG01684]	0.999
AGE>70	D	p6m	B01AC	0.21825	0.525484	0	0	-0.358982	0.72	0	B01AC Platelet aggregation inhibitors excl. heparin	0.999
AGE>70	D	p6m	C07AB	0.257904	1.61691	0	-1	-2.18068	0.0292	1	C07AB Beta blocking AGE>70nts, selective	0.341
AGE>70	D	p6m	C08CA	-0.254696	0.639666	0	0	-1.45883	0.145	0	C08CA Dihydropyridine derivatives [DG:DG01928]	0.677
AGE>70	D	p6m	C09AA	-0.333494	-0.384085	0	0	0.0655232	0.948	0	C09AA ACE inhibitors, plain [DG:DG01501]	0.999
AGE>70	D	p6m	C09CA	0.0692257	-0.517493	0	0	0.567125	0.571	0	C09CA Angiotensin II receptor blockers, plain [DG:DG01495]	0.999
AGE>70	D	p6m	C10AA	-0.24961	0.821398	0	0	-1.97132	0.0487	1	C10AA HMG CoA reductase inhibitors [DG:DG01660]	0.341
AGE>70	D	p6m	G03CA	0.0124602	-13.8725	0	0	0.0145579	0.988	0	G03CA Natural and semisynthetic estrogens, plain	0.999
AGE>70	D	p6m	G04CB	-0.57189	-14.9895	0	0	0.00625137	0.995	0	G04CB Testosterone-5-alpha reductase inhibitors	0.999
AGE>70	D	p6m	H03AA	0.351477	0.552383	0	0	-0.244152	0.807	0	H03AA Thyroid hormones	0.999
AGE>70	D	p6m	R03BA	-0.0639097	-14.5525	0	0	0.0112251	0.991	0	R03BA Glucocorticoids	0.999
AGE>70	E	p6m	A02BC	0.275795	0.465398	-1	-1	-2.24654	0.0247	1	A02BC Proton pump inhibitors [DG:DG01646]	0.173
AGE>70	E	p6m	A03AA	0.250136	0.271014	0	0	-0.0512244	0.959	0	A03AA Synthetic anticholinergics, esters with tertiary amino group	0.962
AGE>70	E	p6m	A10AE	0.272759	-0.624171	0	0	1.74172	0.0816	0	A10AE Insulins and analogues for injection, long-acting	0.228
AGE>70	E	p6m	A10BA	0.131719	0.14022	0	0	-0.0480626	0.962	0	A10BA Biguanides [DG:DG01684]	0.962
AGE>70	E	p6m	B01AC	0.211449	0.250508	-1	-1	-0.292152	0.77	0	B01AC Platelet aggregation inhibitors excl. heparin	0.898
AGE>70	E	p6m	C07AB	-0.0114664	0.256764	0	-1	-2.00576	0.0449	1	C07AB Beta blocking AGE>70nts, selective	0.203
AGE>70	E	p6m	C08CA	0.00981664	0.211785	0	-1	-1.89474	0.0581	0	C08CA Dihydropyridine derivatives [DG:DG01928]	0.203
AGE>70	E	p6m	C09AA	-0.160243	0.097911	0	0	-2.2897	0.022	1	C09AA ACE inhibitors, plain [DG:DG01501]	0.173
AGE>70	E	p6m	C09CA	-0.043741	0.17923	0	0	-1.57867	0.114	0	C09CA Angiotensin II receptor blockers, plain [DG:DG01495]	0.238
AGE>70	E	p6m	C10AA	0.0751204	0.206995	0	-1	-1.55971	0.119	0	C10AA HMG CoA reductase inhibitors [DG:DG01660]	0.238
AGE>70	E	p6m	G03CA	0.0528302	0.226341	0	-1	-0.712735	0.476	0	G03CA Natural and semisynthetic estrogens, plain	0.606
AGE>70	E	p6m	G04CB	-0.097146	-0.404441	0	0	0.762098	0.446	0	G04CB Testosterone-5-alpha reductase inhibitors	0.606
AGE>70	E	p6m	H03AA	-0.0724147	0.0880036	0	0	-1.12601	0.26	0	H03AA Thyroid hormones	0.455
AGE>70	E	p6m	R03BA	0.635718	0.469698	-1	-1	0.771694	0.44	0	R03BA Glucocorticoids	0.606
AGE>70	F	p6m	A02BC	-0.318471	-0.287247	1	1	-0.355255	0.722	0	A02BC Proton pump inhibitors [DG:DG01646]	0.919
AGE>70	F	p6m	A03AA	-0.378949	-0.388985	0	0	0.0236156	0.981	0	A03AA Synthetic anticholinergics, esters with tertiary amino group	0.981
AGE>70	F	p6m	A10AE	-0.115338	-1.02274	0	1	1.68652	0.0917	0	A10AE Insulins and analogues for injection, long-acting	0.48
AGE>70	F	p6m	A10BA	0.0568456	0.0745783	0	0	-0.0929556	0.926	0	A10BA Biguanides [DG:DG01684]	0.981
AGE>70	F	p6m	B01AC	-0.0522609	-0.260012	0	1	1.48535	0.137	0	B01AC Platelet aggregation inhibitors excl. heparin	0.48
AGE>70	F	p6m	C07AB	-0.26994	-0.203991	1	1	-0.472957	0.636	0	C07AB Beta blocking AGE>70nts, selective	0.919
AGE>70	F	p6m	C08CA	-0.100791	-0.0552038	0	0	-0.402047	0.688	0	C08CA Dihydropyridine derivatives [DG:DG01928]	0.919
AGE>70	F	p6m	C09AA	-0.242595	-0.0645353	1	0	-1.49424	0.135	0	C09AA ACE inhibitors, plain [DG:DG01501]	0.48
AGE>70	F	p6m	C09CA	-0.20945	-0.133418	1	0	-0.506619	0.612	0	C09CA Angiotensin II receptor blockers, plain [DG:DG01495]	0.919
AGE>70	F	p6m	C10AA	-0.0748386	-0.0114881	0	0	-0.701416	0.483	0	C10AA HMG CoA reductase inhibitors [DG:DG01660]	0.919
AGE>70	F	p6m	G03CA	-0.55325	-0.444611	1	1	-0.432904	0.665	0	G03CA Natural and semisynthetic estrogens, plain	0.919
AGE>70	F	p6m	G04CB	-0.423524	-0.90884	1	1	1.16177	0.245	0	G04CB Testosterone-5-alpha reductase inhibitors	0.686
AGE>70	F	p6m	H03AA	-0.214328	-0.205695	0	1	-0.0574859	0.954	0	H03AA Thyroid hormones	0.981
AGE>70	F	p6m	R03BA	0.140735	-0.225424	0	0	1.61346	0.107	0	R03BA Glucocorticoids	0.48
AGE>70	G	p6m	A02BC	-0.343872	-0.3057	1	1	-0.260901	0.794	0	A02BC Proton pump inhibitors [DG:DG01646]	0.926
AGE>70	G	p6m	A03AA	-0.116154	-0.336559	0	0	0.336624	0.736	0	A03AA Synthetic anticholinergics, esters with tertiary amino group	0.926
AGE>70	G	p6m	A10AE	0.00901665	-0.378358	0	0	0.590434	0.555	0	A10AE Insulins and analogues for injection, long-acting	0.926
AGE>70	G	p6m	A10BA	-0.196179	-0.0066828	0	0	-0.65384	0.513	0	A10BA Biguanides [DG:DG01684]	0.926
AGE>70	G	p6m	B01AC	-0.0614911	-0.701884	0	1	2.53673	0.0112	-1	B01AC Platelet aggregation inhibitors excl. heparin	0.157
AGE>70	G	p6m	C07AB	-0.229295	-0.310512	0	0	0.350378	0.726	0	C07AB Beta blocking AGE>70nts, selective	0.926
AGE>70	G	p6m	C08CA	-0.211014	-0.209635	0	0	-0.00724506	0.994	0	C08CA Dihydropyridine derivatives [DG:DG01928]	0.994
AGE>70	G	p6m	C09AA	-0.451929	-0.276291	1	0	-0.865811	0.387	0	C09AA ACE inhibitors, plain [DG:DG01501]	0.926
AGE>70	G	p6m	C09CA	-0.30013	-0.387288	0	0	0.341833	0.732	0	C09CA Angiotensin II receptor blockers, plain [DG:DG01495]	0.926
AGE>70	G	p6m	C10AA	-0.418986	-0.391366	1	1	-0.173424	0.862	0	C10AA HMG CoA reductase inhibitors [DG:DG01660]	0.928
AGE>70	G	p6m	G03CA	-0.0584414	-0.546116	0	1	1.27456	0.202	0	G03CA Natural and semisynthetic estrogens, plain	0.926
AGE>70	G	p6m	G04CB	-0.581036	-1.11898	1	0	0.648198	0.517	0	G04CB Testosterone-5-alpha reductase inhibitors	0.926
AGE>70	G	p6m	H03AA	-0.482252	-0.315178	1	0	-0.62569	0.532	0	H03AA Thyroid hormones	0.926
AGE>70	G	p6m	R03BA	-0.301469	-0.419625	0	0	0.276117	0.782	0	R03BA Glucocorticoids	0.926
AGE>70	H	p6m	A02BC	-0.1144	0.261815	0	0	-0.704419	0.481	0	A02BC Proton pump inhibitors [DG:DG01646]	0.999
AGE>70	H	p6m	A03AA	-13.518	-15.2208	0	0	0.000659492	0.999	0	A03AA Synthetic anticholinergics, esters with tertiary amino group	0.999
AGE>70	H	p6m	A10AE	0.650895	1.07902	0	0	-0.246171	0.806	0	A10AE Insulins and analogues for injection, long-acting	0.999
AGE>70	H	p6m	A10BA	-0.306022	-0.37101	0	0	0.0542237	0.957	0	A10BA Biguanides [DG:DG01684]	0.999
AGE>70	H	p6m	B01AC	0.0213988	0.243769	0	0	-0.262316	0.793	0	B01AC Platelet aggregation inhibitors excl. heparin	0.999
AGE>70	H	p6m	C07AB	0.0203094	1.20704	0	-1	-1.91834	0.0551	0	C07AB Beta blocking AGE>70nts, selective	0.386
AGE>70	H	p6m	C08CA	-0.32661	0.427381	0	0	-1.23376	0.217	0	C08CA Dihydropyridine derivatives [DG:DG01928]	0.999
AGE>70	H	p6m	C09AA	-0.42906	-0.404953	0	0	-0.0314165	0.975	0	C09AA ACE inhibitors, plain [DG:DG01501]	0.999
AGE>70	H	p6m	C09CA	-0.086009	-0.744116	0	0	0.634316	0.526	0	C09CA Angiotensin II receptor blockers, plain [DG:DG01495]	0.999
AGE>70	H	p6m	C10AA	-0.394534	0.644819	0	0	-1.92434	0.0543	0	C10AA HMG CoA reductase inhibitors [DG:DG01660]	0.386
AGE>70	H	p6m	G03CA	-0.514553	-14.7001	0	0	0.0134238	0.989	0	G03CA Natural and semisynthetic estrogens, plain	0.999
AGE>70	H	p6m	G04CB	-0.878243	-15.7011	0	0	0.00543734	0.996	0	G04CB Testosterone-5-alpha reductase inhibitors	0.999
AGE>70	H	p6m	H03AA	0.219781	0.301564	0	0	-0.0996745	0.921	0	H03AA Thyroid hormones	0.999
AGE>70	H	p6m	R03BA	-0.540785	-15.3269	0	0	0.0106407	0.992	0	R03BA Glucocorticoids	0.999
Asthma	A	p6m	A02BC	-0.257074	-0.0636778	0	0	-0.727744	0.467	0	A02BC Proton pump inhibitors [DG:DG01646]	0.817
Asthma	A	p6m	A03AA	-0.56256	0.400875	0	0	-0.852533	0.394	0	A03AA Synthetic anticholinergics, esters with tertiary amino group	0.817
Asthma	A	p6m	A10AE	-0.797042	1.43628	0	0	-1.7763	0.0757	0	A10AE Insulins and analogues for injection, long-acting	0.817
Asthma	A	p6m	A10BA	-0.904831	-0.211494	1	0	-1.383	0.167	0	A10BA Biguanides [DG:DG01684]	0.817
Asthma	A	p6m	B01AC	-0.0401354	-0.252819	0	0	0.538928	0.59	0	B01AC Platelet aggregation inhibitors excl. heparin	0.87
Asthma	A	p6m	C07AB	-0.141833	-0.00991533	0	0	-0.324002	0.746	0	C07AB Beta blocking AGE>70nts, selective	0.87
Asthma	A	p6m	C08CA	-0.0148766	-0.264712	0	1	0.778001	0.437	0	C08CA Dihydropyridine derivatives [DG:DG01928]	0.817
Asthma	A	p6m	C09AA	-0.284779	-0.409501	0	1	0.361903	0.717	0	C09AA ACE inhibitors, plain [DG:DG01501]	0.87
Asthma	A	p6m	C09CA	-0.169189	-0.302231	0	0	0.332989	0.739	0	C09CA Angiotensin II receptor blockers, plain [DG:DG01495]	0.87
Asthma	A	p6m	C10AA	-0.401629	-0.603446	0	1	0.726853	0.467	0	C10AA HMG CoA reductase inhibitors [DG:DG01660]	0.817
Asthma	A	p6m	G03CA	0.137728	0.0818909	0	0	0.0953265	0.924	0	G03CA Natural and semisynthetic estrogens, plain	0.958
Asthma	A	p6m	G04CB	-1.07113	-0.0984336	0	0	-0.889092	0.374	0	G04CB Testosterone-5-alpha reductase inhibitors	0.817
Asthma	A	p6m	H03AA	-0.747426	-0.208199	0	0	-1.19916	0.23	0	H03AA Thyroid hormones	0.817
Asthma	A	p6m	R03BA	-0.608649	-0.669056	0	0	0.0526912	0.958	0	R03BA Glucocorticoids	0.958
Asthma	B	p6m	A02BC	0.217242	0.293344	0	0	-0.104027	0.917	0	A02BC Proton pump inhibitors [DG:DG01646]	1
Asthma	B	p6m	A03AA	-15.3119	-14.3611	0	0	-0.000244125	1	0	A03AA Synthetic anticholinergics, esters with tertiary amino group	1
Asthma	B	p6m	A10AE	0.717511	1.25036	0	0	-0.265391	0.791	0	A10AE Insulins and analogues for injection, long-acting	1
Asthma	B	p6m	A10BA	-1.98705	-0.00804736	0	0	-1.04825	0.295	0	A10BA Biguanides [DG:DG01684]	0.898
Asthma	B	p6m	B01AC	-0.588285	0.0546302	0	0	-0.564495	0.572	0	B01AC Platelet aggregation inhibitors excl. heparin	1
Asthma	B	p6m	C07AB	0.204485	0.582518	0	-1	-0.372893	0.709	0	C07AB Beta blocking AGE>70nts, selective	1
Asthma	B	p6m	C08CA	-0.880748	0.0210249	0	0	-0.867937	0.385	0	C08CA Dihydropyridine derivatives [DG:DG01928]	0.898
Asthma	B	p6m	C09AA	-1.21464	0.0146162	0	0	-0.911545	0.362	0	C09AA ACE inhibitors, plain [DG:DG01501]	0.898
Asthma	B	p6m	C09CA	-1.45745	0.146407	0	0	-0.900631	0.368	0	C09CA Angiotensin II receptor blockers, plain [DG:DG01495]	0.898
Asthma	B	p6m	C10AA	-1.38421	0.0588026	0	0	-1.61798	0.106	0	C10AA HMG CoA reductase inhibitors [DG:DG01660]	0.898
Asthma	B	p6m	G03CA	-16.3037	-0.317048	0	0	-0.00511536	0.996	0	G03CA Natural and semisynthetic estrogens, plain	1
Asthma	B	p6m	G04CB	-16.1543	-0.783003	0	0	-0.00348446	0.997	0	G04CB Testosterone-5-alpha reductase inhibitors	1
Asthma	B	p6m	H03AA	1.30123	0.395265	0	0	1.0255	0.305	0	H03AA Thyroid hormones	0.898
Asthma	B	p6m	R03BA	-0.35801	-14.5116	0	0	0.0108475	0.991	0	R03BA Glucocorticoids	1
Asthma	C	p6m	A02BC	0.160203	0.302194	0	-1	-0.737686	0.461	0	A02BC Proton pump inhibitors [DG:DG01646]	0.798
Asthma	C	p6m	A03AA	-0.357093	0.494732	0	0	-0.912677	0.361	0	A03AA Synthetic anticholinergics, esters with tertiary amino group	0.798
Asthma	C	p6m	A10AE	0.420963	0.0654367	0	0	0.494958	0.621	0	A10AE Insulins and analogues for injection, long-acting	0.834
Asthma	C	p6m	A10BA	0.12535	-0.122128	0	0	0.70783	0.479	0	A10BA Biguanides [DG:DG01684]	0.798
Asthma	C	p6m	B01AC	0.10604	0.0836724	0	0	0.0798657	0.936	0	B01AC Platelet aggregation inhibitors excl. heparin	0.975
Asthma	C	p6m	C07AB	0.147971	0.0147455	0	0	0.44683	0.655	0	C07AB Beta blocking AGE>70nts, selective	0.834
Asthma	C	p6m	C08CA	0.278766	-0.123874	0	0	1.71028	0.0872	0	C08CA Dihydropyridine derivatives [DG:DG01928]	0.798
Asthma	C	p6m	C09AA	-0.0202849	-0.342134	0	1	1.25825	0.208	0	C09AA ACE inhibitors, plain [DG:DG01501]	0.798
Asthma	C	p6m	C09CA	0.0311117	-0.17504	0	0	0.695877	0.487	0	C09CA Angiotensin II receptor blockers, plain [DG:DG01495]	0.798
Asthma	C	p6m	C10AA	-0.06269	-0.276524	0	1	1.07263	0.283	0	C10AA HMG CoA reductase inhibitors [DG:DG01660]	0.798
Asthma	C	p6m	G03CA	0.269814	0.284336	0	0	-0.0308692	0.975	0	G03CA Natural and semisynthetic estrogens, plain	0.975
Asthma	C	p6m	G04CB	-0.815315	-0.0629732	0	0	-0.900758	0.368	0	G04CB Testosterone-5-alpha reductase inhibitors	0.798
Asthma	C	p6m	H03AA	-0.387596	-0.154147	0	0	-0.654843	0.513	0	H03AA Thyroid hormones	0.798
Asthma	C	p6m	R03BA	0.127639	0.262117	0	0	-0.2965	0.767	0	R03BA Glucocorticoids	0.895
Asthma	D	p6m	A02BC	0.526608	0.431281	0	-1	0.143804	0.886	0	A02BC Proton pump inhibitors [DG:DG01646]	1
Asthma	D	p6m	A03AA	-15.2533	-13.7269	0	0	-0.000452185	1	0	A03AA Synthetic anticholinergics, esters with tertiary amino group	1
Asthma	D	p6m	A10AE	1.56492	0.900456	0	0	0.397148	0.691	0	A10AE Insulins and analogues for injection, long-acting	1
Asthma	D	p6m	A10BA	-1.49363	-0.120675	0	0	-0.761442	0.446	0	A10BA Biguanides [DG:DG01684]	1
Asthma	D	p6m	B01AC	-0.404327	0.257651	0	0	-0.632311	0.527	0	B01AC Platelet aggregation inhibitors excl. heparin	1
Asthma	D	p6m	C07AB	0.427541	0.398842	0	0	0.030591	0.976	0	C07AB Beta blocking AGE>70nts, selective	1
Asthma	D	p6m	C08CA	-0.365153	-0.0921437	0	0	-0.279413	0.78	0	C08CA Dihydropyridine derivatives [DG:DG01928]	1
Asthma	D	p6m	C09AA	-1.10809	-0.309797	0	0	-0.627541	0.53	0	C09AA ACE inhibitors, plain [DG:DG01501]	1
Asthma	D	p6m	C09CA	-1.38647	0.0828712	0	0	-0.857461	0.391	0	C09CA Angiotensin II receptor blockers, plain [DG:DG01495]	1
Asthma	D	p6m	C10AA	-1.05748	-0.0490259	0	0	-1.25257	0.21	0	C10AA HMG CoA reductase inhibitors [DG:DG01660]	1
Asthma	D	p6m	G03CA	-14.839	-0.0899269	0	0	-0.00815818	0.993	0	G03CA Natural and semisynthetic estrogens, plain	1
Asthma	D	p6m	G04CB	-15.4621	-0.541412	0	0	-0.00613167	0.995	0	G04CB Testosterone-5-alpha reductase inhibitors	1
Asthma	D	p6m	H03AA	1.1357	0.261075	0	0	1.09923	0.272	0	H03AA Thyroid hormones	1
Asthma	D	p6m	R03BA	0.130091	-13.5447	0	0	0.0208311	0.983	0	R03BA Glucocorticoids	1
Asthma	E	p6m	A02BC	0.297197	0.395629	-1	-1	-0.887595	0.375	0	A02BC Proton pump inhibitors [DG:DG01646]	0.655
Asthma	E	p6m	A03AA	0.292164	0.23207	0	0	0.130815	0.896	0	A03AA Synthetic anticholinergics, esters with tertiary amino group	0.896
Asthma	E	p6m	A10AE	0.54773	-0.559341	0	0	2.10134	0.0356	-1	A10AE Insulins and analogues for injection, long-acting	0.249
Asthma	E	p6m	A10BA	0.501783	0.0277127	-1	0	2.23594	0.0254	-1	A10BA Biguanides [DG:DG01684]	0.249
Asthma	E	p6m	B01AC	0.13527	0.271536	0	-1	-0.745657	0.456	0	B01AC Platelet aggregation inhibitors excl. heparin	0.655
Asthma	E	p6m	C07AB	0.262091	0.0961296	0	0	0.88025	0.379	0	C07AB Beta blocking AGE>70nts, selective	0.655
Asthma	E	p6m	C08CA	0.319692	0.0762704	-1	0	1.70684	0.0879	0	C08CA Dihydropyridine derivatives [DG:DG01928]	0.41
Asthma	E	p6m	C09AA	0.0824162	-0.0363512	0	0	0.78649	0.432	0	C09AA ACE inhibitors, plain [DG:DG01501]	0.655
Asthma	E	p6m	C09CA	0.205838	0.0339048	0	0	0.965694	0.334	0	C09CA Angiotensin II receptor blockers, plain [DG:DG01495]	0.655
Asthma	E	p6m	C10AA	0.0918898	0.139576	0	-1	-0.401217	0.688	0	C10AA HMG CoA reductase inhibitors [DG:DG01660]	0.803
Asthma	E	p6m	G03CA	0.262582	0.188346	0	0	0.305842	0.76	0	G03CA Natural and semisynthetic estrogens, plain	0.818
Asthma	E	p6m	G04CB	-0.307211	-0.0284395	0	0	-0.586219	0.558	0	G04CB Testosterone-5-alpha reductase inhibitors	0.71
Asthma	E	p6m	H03AA	0.123819	-0.00422427	0	0	0.725522	0.468	0	H03AA Thyroid hormones	0.655
Asthma	E	p6m	R03BA	0.439032	0.659875	-1	-1	-1.00966	0.313	0	R03BA Glucocorticoids	0.655
Asthma	F	p6m	A02BC	-0.325818	-0.317519	1	1	-0.0711866	0.943	0	A02BC Proton pump inhibitors [DG:DG01646]	0.943
Asthma	F	p6m	A03AA	-0.465751	-0.38679	0	0	-0.163355	0.87	0	A03AA Synthetic anticholinergics, esters with tertiary amino group	0.943
Asthma	F	p6m	A10AE	0.105498	-0.953434	0	1	1.86839	0.0617	0	A10AE Insulins and analogues for injection, long-acting	0.335
Asthma	F	p6m	A10BA	0.420281	-0.0577153	-1	0	2.02188	0.0432	-1	A10BA Biguanides [DG:DG01684]	0.335
Asthma	F	p6m	B01AC	-0.171374	-0.119424	0	0	-0.27336	0.785	0	B01AC Platelet aggregation inhibitors excl. heparin	0.943
Asthma	F	p6m	C07AB	-0.0320369	-0.281959	0	1	1.27333	0.203	0	C07AB Beta blocking AGE>70nts, selective	0.568
Asthma	F	p6m	C08CA	0.12492	-0.129564	0	1	1.6658	0.0958	0	C08CA Dihydropyridine derivatives [DG:DG01928]	0.335
Asthma	F	p6m	C09AA	-0.0120676	-0.182917	0	1	1.06101	0.289	0	C09AA ACE inhibitors, plain [DG:DG01501]	0.674
Asthma	F	p6m	C09CA	0.090091	-0.230433	0	1	1.68147	0.0927	0	C09CA Angiotensin II receptor blockers, plain [DG:DG01495]	0.335
Asthma	F	p6m	C10AA	-0.0435013	-0.0615444	0	0	0.141831	0.887	0	C10AA HMG CoA reductase inhibitors [DG:DG01660]	0.943
Asthma	F	p6m	G03CA	-0.310188	-0.49409	0	1	0.714257	0.475	0	G03CA Natural and semisynthetic estrogens, plain	0.792
Asthma	F	p6m	G04CB	-0.836599	-0.409349	0	1	-0.872163	0.383	0	G04CB Testosterone-5-alpha reductase inhibitors	0.766
Asthma	F	p6m	H03AA	-0.121053	-0.245355	0	1	0.660194	0.509	0	H03AA Thyroid hormones	0.792
Asthma	F	p6m	R03BA	-0.116695	-0.0966264	0	0	-0.0853686	0.932	0	R03BA Glucocorticoids	0.943
Asthma	G	p6m	A02BC	-0.384355	-0.345886	1	1	-0.199219	0.842	0	A02BC Proton pump inhibitors [DG:DG01646]	0.949
Asthma	G	p6m	A03AA	-0.973955	-0.0746802	0	0	-0.951768	0.341	0	A03AA Synthetic anticholinergics, esters with tertiary amino group	0.796
Asthma	G	p6m	A10AE	-0.0266786	-0.316118	0	0	0.388006	0.698	0	A10AE Insulins and analogues for injection, long-acting	0.949
Asthma	G	p6m	A10BA	0.0327614	-0.20493	0	0	0.653276	0.514	0	A10BA Biguanides [DG:DG01684]	0.898
Asthma	G	p6m	B01AC	-0.167545	-0.250352	0	1	0.29323	0.769	0	B01AC Platelet aggregation inhibitors excl. heparin	0.949
Asthma	G	p6m	C07AB	-0.0894318	-0.300866	0	1	0.70117	0.483	0	C07AB Beta blocking AGE>70nts, selective	0.898
Asthma	G	p6m	C08CA	0.117454	-0.304073	0	1	1.74622	0.0808	0	C08CA Dihydropyridine derivatives [DG:DG01928]	0.787
Asthma	G	p6m	C09AA	-0.086099	-0.447692	0	1	1.38817	0.165	0	C09AA ACE inhibitors, plain [DG:DG01501]	0.787
Asthma	G	p6m	C09CA	-0.0696935	-0.398006	0	1	1.0775	0.281	0	C09CA Angiotensin II receptor blockers, plain [DG:DG01495]	0.787
Asthma	G	p6m	C10AA	-0.206592	-0.464945	0	1	1.26048	0.207	0	C10AA HMG CoA reductase inhibitors [DG:DG01660]	0.787
Asthma	G	p6m	G03CA	-0.29972	-0.37137	0	0	0.149886	0.881	0	G03CA Natural and semisynthetic estrogens, plain	0.949
Asthma	G	p6m	G04CB	-1.31265	-0.402254	0	0	-1.07873	0.281	0	G04CB Testosterone-5-alpha reductase inhibitors	0.787
Asthma	G	p6m	H03AA	-0.579639	-0.377981	0	1	-0.558136	0.577	0	H03AA Thyroid hormones	0.898
Asthma	G	p6m	R03BA	-0.369481	-0.39181	0	0	0.0483901	0.961	0	R03BA Glucocorticoids	0.961
Asthma	H	p6m	A02BC	0.0594135	-0.0700009	0	0	0.198641	0.843	0	A02BC Proton pump inhibitors [DG:DG01646]	1
Asthma	H	p6m	A03AA	-15.7292	-14.2768	0	0	-0.000447903	1	0	A03AA Synthetic anticholinergics, esters with tertiary amino group	1
Asthma	H	p6m	A10AE	1.02029	0.563283	0	0	0.264452	0.791	0	A10AE Insulins and analogues for injection, long-acting	1
Asthma	H	p6m	A10BA	-1.52086	-0.228534	0	0	-0.712173	0.476	0	A10BA Biguanides [DG:DG01684]	1
Asthma	H	p6m	B01AC	-0.599126	0.0571448	0	0	-0.634331	0.526	0	B01AC Platelet aggregation inhibitors excl. heparin	1
Asthma	H	p6m	C07AB	0.12256	0.149967	0	0	-0.0290622	0.977	0	C07AB Beta blocking AGE>70nts, selective	1
Asthma	H	p6m	C08CA	-0.559569	-0.184797	0	0	-0.378084	0.705	0	C08CA Dihydropyridine derivatives [DG:DG01928]	1
Asthma	H	p6m	C09AA	-1.23151	-0.39601	0	0	-0.65207	0.514	0	C09AA ACE inhibitors, plain [DG:DG01501]	1
Asthma	H	p6m	C09CA	-1.40462	-0.0784819	0	0	-0.773135	0.439	0	C09CA Angiotensin II receptor blockers, plain [DG:DG01495]	1
Asthma	H	p6m	C10AA	-1.19717	-0.18538	0	0	-1.23948	0.215	0	C10AA HMG CoA reductase inhibitors [DG:DG01660]	1
Asthma	H	p6m	G03CA	-15.4591	-0.633912	0	0	-0.00781385	0.994	0	G03CA Natural and semisynthetic estrogens, plain	1
Asthma	H	p6m	G04CB	-15.9849	-0.847464	0	0	-0.00591113	0.995	0	G04CB Testosterone-5-alpha reductase inhibitors	1
Asthma	H	p6m	H03AA	1.1247	0.0904993	0	0	1.30075	0.193	0	H03AA Thyroid hormones	1
Asthma	H	p6m	R03BA	-0.358476	-14.1526	0	0	0.0209548	0.983	0	R03BA Glucocorticoids	1
BMI>30	A	p6m	A02BC	-0.261897	-0.0345555	0	0	-1.16428	0.244	0	A02BC Proton pump inhibitors [DG:DG01646]	0.831
BMI>30	A	p6m	A03AA	-0.242773	0.509712	0	0	-0.848504	0.396	0	A03AA Synthetic anticholinergics, esters with tertiary amino group	0.831
BMI>30	A	p6m	A10AE	0.429591	0.629499	0	0	-0.174349	0.862	0	A10AE Insulins and analogues for injection, long-acting	0.996
BMI>30	A	p6m	A10BA	-0.499883	-0.244055	0	0	-0.657791	0.511	0	A10BA Biguanides [DG:DG01684]	0.831
BMI>30	A	p6m	B01AC	-0.472091	-0.0954909	0	0	-1.26549	0.206	0	B01AC Platelet aggregation inhibitors excl. heparin	0.831
BMI>30	A	p6m	C07AB	-0.0138231	-0.0153137	0	0	0.00514527	0.996	0	C07AB Beta blocking AGE>70nts, selective	0.996
BMI>30	A	p6m	C08CA	-0.219801	-0.242073	0	0	0.0927974	0.926	0	C08CA Dihydropyridine derivatives [DG:DG01928]	0.996
BMI>30	A	p6m	C09AA	-0.401205	-0.383576	1	1	-0.0688145	0.945	0	C09AA ACE inhibitors, plain [DG:DG01501]	0.996
BMI>30	A	p6m	C09CA	-0.287058	-0.291385	0	0	0.0136912	0.989	0	C09CA Angiotensin II receptor blockers, plain [DG:DG01495]	0.996
BMI>30	A	p6m	C10AA	-0.680466	-0.518173	1	1	-0.797414	0.425	0	C10AA HMG CoA reductase inhibitors [DG:DG01660]	0.831
BMI>30	A	p6m	G03CA	-0.205797	0.143036	0	0	-0.622358	0.534	0	G03CA Natural and semisynthetic estrogens, plain	0.831
BMI>30	A	p6m	G04CB	-0.637156	-0.027287	0	0	-0.86285	0.388	0	G04CB Testosterone-5-alpha reductase inhibitors	0.831
BMI>30	A	p6m	H03AA	-0.045854	-0.489504	0	1	1.31411	0.189	0	H03AA Thyroid hormones	0.831
BMI>30	A	p6m	R03BA	-0.536085	1.68676	0	0	-1.35589	0.175	0	R03BA Glucocorticoids	0.831
BMI>30	B	p6m	A02BC	0.597273	-0.112792	0	0	1.61101	0.107	0	A02BC Proton pump inhibitors [DG:DG01646]	0.773
BMI>30	B	p6m	A03AA	-14.4196	-14.0221	0	0	-0.000290569	1	0	A03AA Synthetic anticholinergics, esters with tertiary amino group	1
BMI>30	B	p6m	A10AE	0.551956	1.93366	0	0	-0.825015	0.409	0	A10AE Insulins and analogues for injection, long-acting	0.826
BMI>30	B	p6m	A10BA	-0.448916	-0.309323	0	0	-0.152946	0.878	0	A10BA Biguanides [DG:DG01684]	1
BMI>30	B	p6m	B01AC	-0.479867	0.232887	0	0	-1.22456	0.221	0	B01AC Platelet aggregation inhibitors excl. heparin	0.773
BMI>30	B	p6m	C07AB	0.360947	0.704337	0	-1	-0.647562	0.517	0	C07AB Beta blocking AGE>70nts, selective	0.905
BMI>30	B	p6m	C08CA	0.287318	-0.144068	0	0	0.819348	0.413	0	C08CA Dihydropyridine derivatives [DG:DG01928]	0.826
BMI>30	B	p6m	C09AA	-0.132483	-0.0951442	0	0	-0.0657036	0.948	0	C09AA ACE inhibitors, plain [DG:DG01501]	1
BMI>30	B	p6m	C09CA	0.16041	0.0857341	0	0	0.116401	0.907	0	C09CA Angiotensin II receptor blockers, plain [DG:DG01495]	1
BMI>30	B	p6m	C10AA	-0.144402	-0.0237142	0	0	-0.281079	0.779	0	C10AA HMG CoA reductase inhibitors [DG:DG01660]	1
BMI>30	B	p6m	G03CA	-15.0022	0.00525773	0	0	-0.0127622	0.99	0	G03CA Natural and semisynthetic estrogens, plain	1
BMI>30	B	p6m	G04CB	-2.92642	-0.275821	0	0	-1.06125	0.289	0	G04CB Testosterone-5-alpha reductase inhibitors	0.809
BMI>30	B	p6m	H03AA	0.98213	-0.0259614	-1	0	1.37688	0.169	0	H03AA Thyroid hormones	0.773
BMI>30	B	p6m	R03BA	-0.0404673	2.20525	0	0	-1.41444	0.157	0	R03BA Glucocorticoids	0.773
BMI>30	C	p6m	A02BC	0.179268	0.326296	0	-1	-0.967029	0.334	0	A02BC Proton pump inhibitors [DG:DG01646]	0.849
BMI>30	C	p6m	A03AA	0.26203	0.371196	0	0	-0.16403	0.87	0	A03AA Synthetic anticholinergics, esters with tertiary amino group	0.981
BMI>30	C	p6m	A10AE	0.276363	0.0600701	0	0	0.335097	0.738	0	A10AE Insulins and analogues for injection, long-acting	0.981
BMI>30	C	p6m	A10BA	-0.225103	0.0994796	0	0	-1.15019	0.25	0	A10BA Biguanides [DG:DG01684]	0.849
BMI>30	C	p6m	B01AC	-0.0665614	0.167032	0	0	-1.06449	0.287	0	B01AC Platelet aggregation inhibitors excl. heparin	0.849
BMI>30	C	p6m	C07AB	0.0310928	0.0260481	0	0	0.0231984	0.981	0	C07AB Beta blocking AGE>70nts, selective	0.981
BMI>30	C	p6m	C08CA	-0.0480877	-0.0729159	0	0	0.133927	0.893	0	C08CA Dihydropyridine derivatives [DG:DG01928]	0.981
BMI>30	C	p6m	C09AA	-0.344517	-0.256885	1	1	-0.438112	0.661	0	C09AA ACE inhibitors, plain [DG:DG01501]	0.981
BMI>30	C	p6m	C09CA	-0.170887	-0.114868	0	0	-0.231849	0.817	0	C09CA Angiotensin II receptor blockers, plain [DG:DG01495]	0.981
BMI>30	C	p6m	C10AA	-0.383173	-0.178845	1	0	-1.32247	0.186	0	C10AA HMG CoA reductase inhibitors [DG:DG01660]	0.849
BMI>30	C	p6m	G03CA	0.217922	0.291229	0	0	-0.15723	0.875	0	G03CA Natural and semisynthetic estrogens, plain	0.981
BMI>30	C	p6m	G04CB	-0.476682	-0.00830984	0	0	-0.908629	0.364	0	G04CB Testosterone-5-alpha reductase inhibitors	0.849
BMI>30	C	p6m	H03AA	0.0228816	-0.345947	0	1	1.38622	0.166	0	H03AA Thyroid hormones	0.849
BMI>30	C	p6m	R03BA	0.206218	-11.5789	0	0	0.0726101	0.942	0	R03BA Glucocorticoids	0.981
BMI>30	D	p6m	A02BC	0.900689	0.115905	-1	0	1.96765	0.0491	-1	A02BC Proton pump inhibitors [DG:DG01646]	0.687
BMI>30	D	p6m	A03AA	-12.8296	-13.6111	0	0	0.000837128	0.999	0	A03AA Synthetic anticholinergics, esters with tertiary amino group	0.999
BMI>30	D	p6m	A10AE	0.621672	1.47671	0	0	-0.682256	0.495	0	A10AE Insulins and analogues for injection, long-acting	0.999
BMI>30	D	p6m	A10BA	-0.407595	-0.0162222	0	0	-0.486622	0.627	0	A10BA Biguanides [DG:DG01684]	0.999
BMI>30	D	p6m	B01AC	-0.0881972	0.38933	0	0	-0.923542	0.356	0	B01AC Platelet aggregation inhibitors excl. heparin	0.999
BMI>30	D	p6m	C07AB	0.426884	0.40722	0	0	0.04181	0.967	0	C07AB Beta blocking AGE>70nts, selective	0.999
BMI>30	D	p6m	C08CA	0.0910967	-0.286981	0	0	0.790626	0.429	0	C08CA Dihydropyridine derivatives [DG:DG01928]	0.999
BMI>30	D	p6m	C09AA	-0.301396	-0.402645	0	0	0.197366	0.844	0	C09AA ACE inhibitors, plain [DG:DG01501]	0.999
BMI>30	D	p6m	C09CA	0.0263924	-0.00221441	0	0	0.0497664	0.96	0	C09CA Angiotensin II receptor blockers, plain [DG:DG01495]	0.999
BMI>30	D	p6m	C10AA	-0.104783	-0.162175	0	0	0.14632	0.884	0	C10AA HMG CoA reductase inhibitors [DG:DG01660]	0.999
BMI>30	D	p6m	G03CA	-13.298	0.0919209	0	0	-0.0194416	0.984	0	G03CA Natural and semisynthetic estrogens, plain	0.999
BMI>30	D	p6m	G04CB	-2.19755	-0.292088	0	0	-0.807683	0.419	0	G04CB Testosterone-5-alpha reductase inhibitors	0.999
BMI>30	D	p6m	H03AA	0.734069	0.0329096	0	0	1.11603	0.264	0	H03AA Thyroid hormones	0.999
BMI>30	D	p6m	R03BA	0.291988	-12.6859	0	0	0.0117429	0.991	0	R03BA Glucocorticoids	0.999
BMI>30	E	p6m	A02BC	0.369391	0.376766	-1	-1	-0.0835768	0.933	0	A02BC Proton pump inhibitors [DG:DG01646]	0.933
BMI>30	E	p6m	A03AA	0.500298	0.0886915	0	0	1.01754	0.309	0	A03AA Synthetic anticholinergics, esters with tertiary amino group	0.892
BMI>30	E	p6m	A10AE	-0.0796335	-0.384329	0	0	0.588172	0.556	0	A10AE Insulins and analogues for injection, long-acting	0.892
BMI>30	E	p6m	A10BA	0.0700958	0.200705	0	0	-0.740044	0.459	0	A10BA Biguanides [DG:DG01684]	0.892
BMI>30	E	p6m	B01AC	0.14548	0.302683	0	-1	-1.14064	0.254	0	B01AC Platelet aggregation inhibitors excl. heparin	0.892
BMI>30	E	p6m	C07AB	0.106319	0.124523	0	0	-0.132262	0.895	0	C07AB Beta blocking AGE>70nts, selective	0.933
BMI>30	E	p6m	C08CA	0.135866	0.0939912	0	0	0.384166	0.701	0	C08CA Dihydropyridine derivatives [DG:DG01928]	0.892
BMI>30	E	p6m	C09AA	-0.0680942	0.0152825	0	0	-0.731891	0.464	0	C09AA ACE inhibitors, plain [DG:DG01501]	0.892
BMI>30	E	p6m	C09CA	0.0393135	0.0779141	0	0	-0.270926	0.786	0	C09CA Angiotensin II receptor blockers, plain [DG:DG01495]	0.917
BMI>30	E	p6m	C10AA	0.0146252	0.18362	0	-1	-1.887	0.0592	0	C10AA HMG CoA reductase inhibitors [DG:DG01660]	0.414
BMI>30	E	p6m	G03CA	0.312323	0.177114	0	0	0.569413	0.569	0	G03CA Natural and semisynthetic estrogens, plain	0.892
BMI>30	E	p6m	G04CB	-0.172845	-0.0164724	0	0	-0.470752	0.638	0	G04CB Testosterone-5-alpha reductase inhibitors	0.892
BMI>30	E	p6m	H03AA	0.0576642	0.000712854	0	0	0.391544	0.695	0	H03AA Thyroid hormones	0.892
BMI>30	E	p6m	R03BA	0.446701	-0.830331	-1	0	2.01928	0.0435	-1	R03BA Glucocorticoids	0.414
BMI>30	F	p6m	A02BC	-0.25929	-0.353697	1	1	1.01944	0.308	0	A02BC Proton pump inhibitors [DG:DG01646]	0.719
BMI>30	F	p6m	A03AA	-0.000125968	-0.614805	0	1	1.42854	0.153	0	A03AA Synthetic anticholinergics, esters with tertiary amino group	0.624
BMI>30	F	p6m	A10AE	-0.469586	-0.820552	0	1	0.646537	0.518	0	A10AE Insulins and analogues for injection, long-acting	0.835
BMI>30	F	p6m	A10BA	-0.0222315	0.130488	0	0	-0.795519	0.426	0	A10BA Biguanides [DG:DG01684]	0.835
BMI>30	F	p6m	B01AC	-0.167224	-0.110725	0	0	-0.392161	0.695	0	B01AC Platelet aggregation inhibitors excl. heparin	0.842
BMI>30	F	p6m	C07AB	-0.217576	-0.261548	0	1	0.307558	0.758	0	C07AB Beta blocking AGE>70nts, selective	0.842
BMI>30	F	p6m	C08CA	0.00132759	-0.144651	0	1	1.25012	0.211	0	C08CA Dihydropyridine derivatives [DG:DG01928]	0.624
BMI>30	F	p6m	C09AA	-0.122253	-0.173093	0	1	0.419438	0.675	0	C09AA ACE inhibitors, plain [DG:DG01501]	0.842
BMI>30	F	p6m	C09CA	-0.160634	-0.190788	0	0	0.198881	0.842	0	C09CA Angiotensin II receptor blockers, plain [DG:DG01495]	0.842
BMI>30	F	p6m	C10AA	-0.151799	-0.0211072	0	0	-1.36	0.174	0	C10AA HMG CoA reductase inhibitors [DG:DG01660]	0.624
BMI>30	F	p6m	G03CA	-0.409296	-0.477539	0	1	0.271218	0.786	0	G03CA Natural and semisynthetic estrogens, plain	0.842
BMI>30	F	p6m	G04CB	-0.602929	-0.39025	1	1	-0.617144	0.537	0	G04CB Testosterone-5-alpha reductase inhibitors	0.835
BMI>30	F	p6m	H03AA	-0.0915728	-0.280406	0	1	1.21833	0.223	0	H03AA Thyroid hormones	0.624
BMI>30	F	p6m	R03BA	-0.0804501	-1.81249	0	1	2.67822	0.0074	-1	R03BA Glucocorticoids	0.104
BMI>30	G	p6m	A02BC	-0.384807	-0.34865	1	1	-0.236814	0.813	0	A02BC Proton pump inhibitors [DG:DG01646]	0.939
BMI>30	G	p6m	A03AA	-0.174618	-0.255549	0	0	0.11887	0.905	0	A03AA Synthetic anticholinergics, esters with tertiary amino group	0.939
BMI>30	G	p6m	A10AE	-0.132032	-0.35603	0	0	0.33705	0.736	0	A10AE Insulins and analogues for injection, long-acting	0.939
BMI>30	G	p6m	A10BA	-0.314644	0.0357512	0	0	-1.2008	0.23	0	A10BA Biguanides [DG:DG01684]	0.939
BMI>30	G	p6m	B01AC	-0.319714	-0.193676	0	0	-0.566394	0.571	0	B01AC Platelet aggregation inhibitors excl. heparin	0.939
BMI>30	G	p6m	C07AB	-0.236491	-0.301746	0	1	0.297053	0.766	0	C07AB Beta blocking AGE>70nts, selective	0.939
BMI>30	G	p6m	C08CA	-0.162411	-0.290334	0	1	0.672365	0.501	0	C08CA Dihydropyridine derivatives [DG:DG01928]	0.939
BMI>30	G	p6m	C09AA	-0.376814	-0.400157	1	1	0.114532	0.909	0	C09AA ACE inhibitors, plain [DG:DG01501]	0.939
BMI>30	G	p6m	C09CA	-0.321006	-0.353327	0	1	0.130834	0.896	0	C09CA Angiotensin II receptor blockers, plain [DG:DG01495]	0.939
BMI>30	G	p6m	C10AA	-0.542507	-0.372615	1	1	-1.07009	0.285	0	C10AA HMG CoA reductase inhibitors [DG:DG01660]	0.939
BMI>30	G	p6m	G03CA	-0.477437	-0.340757	0	0	-0.288766	0.773	0	G03CA Natural and semisynthetic estrogens, plain	0.939
BMI>30	G	p6m	G04CB	-0.871409	-0.349153	1	0	-0.996646	0.319	0	G04CB Testosterone-5-alpha reductase inhibitors	0.939
BMI>30	G	p6m	H03AA	-0.110415	-0.605292	0	1	1.82633	0.0678	0	H03AA Thyroid hormones	0.939
BMI>30	G	p6m	R03BA	-0.258431	-12.4097	0	0	0.0770217	0.939	0	R03BA Glucocorticoids	0.939
BMI>30	H	p6m	A02BC	0.340912	-0.393386	0	0	1.84225	0.0654	0	A02BC Proton pump inhibitors [DG:DG01646]	0.916
BMI>30	H	p6m	A03AA	-13.2529	-14.1486	0	0	0.000922364	0.999	0	A03AA Synthetic anticholinergics, esters with tertiary amino group	0.999
BMI>30	H	p6m	A10AE	0.217429	1.00398	0	0	-0.613744	0.539	0	A10AE Insulins and analogues for injection, long-acting	0.999
BMI>30	H	p6m	A10BA	-0.390849	-0.159806	0	0	-0.280846	0.779	0	A10BA Biguanides [DG:DG01684]	0.999
BMI>30	H	p6m	B01AC	-0.275892	0.150642	0	0	-0.81411	0.416	0	B01AC Platelet aggregation inhibitors excl. heparin	0.999
BMI>30	H	p6m	C07AB	0.212531	0.170675	0	0	0.0878016	0.93	0	C07AB Beta blocking AGE>70nts, selective	0.999
BMI>30	H	p6m	C08CA	0.0137512	-0.40256	0	0	0.857149	0.391	0	C08CA Dihydropyridine derivatives [DG:DG01928]	0.999
BMI>30	H	p6m	C09AA	-0.337156	-0.507719	0	0	0.328614	0.742	0	C09AA ACE inhibitors, plain [DG:DG01501]	0.999
BMI>30	H	p6m	C09CA	-0.0819396	-0.235573	0	0	0.264012	0.792	0	C09CA Angiotensin II receptor blockers, plain [DG:DG01495]	0.999
BMI>30	H	p6m	C10AA	-0.230362	-0.337445	0	0	0.267725	0.789	0	C10AA HMG CoA reductase inhibitors [DG:DG01660]	0.999
BMI>30	H	p6m	G03CA	-13.9772	-0.476559	0	0	-0.0196516	0.984	0	G03CA Natural and semisynthetic estrogens, plain	0.999
BMI>30	H	p6m	G04CB	-2.70275	-0.477277	0	0	-0.939541	0.347	0	G04CB Testosterone-5-alpha reductase inhibitors	0.999
BMI>30	H	p6m	H03AA	0.61795	-0.196817	0	0	1.26327	0.206	0	H03AA Thyroid hormones	0.999
BMI>30	H	p6m	R03BA	-0.140732	-13.0953	0	0	0.0117244	0.991	0	R03BA Glucocorticoids	0.999
CAD	A	p6m	A02BC	-0.0905543	-0.103765	0	0	0.0456822	0.964	0	A02BC Proton pump inhibitors [DG:DG01646]	0.979
CAD	A	p6m	A03AA	-1.08545	0.303791	0	0	-0.718855	0.472	0	A03AA Synthetic anticholinergics, esters with tertiary amino group	0.958
CAD	A	p6m	A10AE	-0.120424	0.770993	0	0	-0.708127	0.479	0	A10AE Insulins and analogues for injection, long-acting	0.958
CAD	A	p6m	A10BA	-0.380516	-0.365783	0	0	-0.0265584	0.979	0	A10BA Biguanides [DG:DG01684]	0.979
CAD	A	p6m	B01AC	-0.2709	-0.19209	0	0	-0.248617	0.804	0	B01AC Platelet aggregation inhibitors excl. heparin	0.979
CAD	A	p6m	C07AB	-0.232764	0.049367	0	0	-0.862269	0.389	0	C07AB Beta blocking AGE>70nts, selective	0.958
CAD	A	p6m	C08CA	-0.145882	-0.24277	0	0	0.251179	0.802	0	C08CA Dihydropyridine derivatives [DG:DG01928]	0.979
CAD	A	p6m	C09AA	-0.356038	-0.383182	0	1	0.0812981	0.935	0	C09AA ACE inhibitors, plain [DG:DG01501]	0.979
CAD	A	p6m	C09CA	-0.441153	-0.260003	0	0	-0.419812	0.675	0	C09CA Angiotensin II receptor blockers, plain [DG:DG01495]	0.979
CAD	A	p6m	C10AA	-0.326306	-0.604942	0	1	0.923647	0.356	0	C10AA HMG CoA reductase inhibitors [DG:DG01660]	0.958
CAD	A	p6m	G03CA	0.24212	0.0647408	0	0	0.143658	0.886	0	G03CA Natural and semisynthetic estrogens, plain	0.979
CAD	A	p6m	G04CB	-0.690267	-0.1234	0	0	-0.744061	0.457	0	G04CB Testosterone-5-alpha reductase inhibitors	0.958
CAD	A	p6m	H03AA	-0.913624	-0.241098	0	0	-1.1096	0.267	0	H03AA Thyroid hormones	0.958
CAD	A	p6m	R03BA	-0.801617	1.82014	0	0	-1.58291	0.113	0	R03BA Glucocorticoids	0.958
CAD	B	p6m	A02BC	0.262227	0.245545	0	0	0.0322521	0.974	0	A02BC Proton pump inhibitors [DG:DG01646]	0.999
CAD	B	p6m	A03AA	-13.0837	-14.1931	0	0	0.000638712	0.999	0	A03AA Synthetic anticholinergics, esters with tertiary amino group	0.999
CAD	B	p6m	A10AE	1.45144	1.09048	0	0	0.212621	0.832	0	A10AE Insulins and analogues for injection, long-acting	0.999
CAD	B	p6m	A10BA	-0.259236	-0.300123	0	0	0.0412925	0.967	0	A10BA Biguanides [DG:DG01684]	0.999
CAD	B	p6m	B01AC	0.325452	-0.151961	0	0	0.82941	0.407	0	B01AC Platelet aggregation inhibitors excl. heparin	0.999
CAD	B	p6m	C07AB	0.182909	0.731146	0	-1	-0.974881	0.33	0	C07AB Beta blocking AGE>70nts, selective	0.999
CAD	B	p6m	C08CA	-0.856578	0.0821927	0	0	-1.14857	0.251	0	C08CA Dihydropyridine derivatives [DG:DG01928]	0.999
CAD	B	p6m	C09AA	0.234572	-0.241778	0	0	0.784956	0.432	0	C09AA ACE inhibitors, plain [DG:DG01501]	0.999
CAD	B	p6m	C09CA	0.112061	-0.0494453	0	0	0.217991	0.827	0	C09CA Angiotensin II receptor blockers, plain [DG:DG01495]	0.999
CAD	B	p6m	C10AA	-0.0721048	-0.0624058	0	0	-0.0181794	0.985	0	C10AA HMG CoA reductase inhibitors [DG:DG01660]	0.999
CAD	B	p6m	G03CA	-14.9118	-0.284227	0	0	-0.0122585	0.99	0	G03CA Natural and semisynthetic estrogens, plain	0.999
CAD	B	p6m	G04CB	-0.897108	-0.965892	0	0	0.050873	0.959	0	G04CB Testosterone-5-alpha reductase inhibitors	0.999
CAD	B	p6m	H03AA	-0.261715	0.753487	0	-1	-0.981264	0.326	0	H03AA Thyroid hormones	0.999
CAD	B	p6m	R03BA	-15.2565	1.02225	0	0	-0.0112111	0.991	0	R03BA Glucocorticoids	0.999
CAD	C	p6m	A02BC	0.127545	0.305004	0	-1	-0.902116	0.367	0	A02BC Proton pump inhibitors [DG:DG01646]	0.893
CAD	C	p6m	A03AA	-1.26916	0.474877	0	0	-1.04548	0.296	0	A03AA Synthetic anticholinergics, esters with tertiary amino group	0.893
CAD	C	p6m	A10AE	-0.0377366	0.217749	0	0	-0.348845	0.727	0	A10AE Insulins and analogues for injection, long-acting	0.893
CAD	C	p6m	A10BA	-0.241673	-0.030106	0	0	-0.61943	0.536	0	A10BA Biguanides [DG:DG01684]	0.893
CAD	C	p6m	B01AC	0.00388307	0.122329	0	0	-0.540443	0.589	0	B01AC Platelet aggregation inhibitors excl. heparin	0.893
CAD	C	p6m	C07AB	-0.323868	0.194545	0	0	-2.31406	0.0207	1	C07AB Beta blocking AGE>70nts, selective	0.29
CAD	C	p6m	C08CA	-0.180794	-0.0346781	0	0	-0.564919	0.572	0	C08CA Dihydropyridine derivatives [DG:DG01928]	0.893
CAD	C	p6m	C09AA	-0.322605	-0.288283	0	1	-0.147056	0.883	0	C09AA ACE inhibitors, plain [DG:DG01501]	0.893
CAD	C	p6m	C09CA	-0.311434	-0.0944906	0	0	-0.72302	0.47	0	C09CA Angiotensin II receptor blockers, plain [DG:DG01495]	0.893
CAD	C	p6m	C10AA	-0.192203	-0.258751	0	1	0.338557	0.735	0	C10AA HMG CoA reductase inhibitors [DG:DG01660]	0.893
CAD	C	p6m	G03CA	0.124431	0.294226	0	0	-0.206208	0.837	0	G03CA Natural and semisynthetic estrogens, plain	0.893
CAD	C	p6m	G04CB	-0.113493	-0.183559	0	0	0.134778	0.893	0	G04CB Testosterone-5-alpha reductase inhibitors	0.893
CAD	C	p6m	H03AA	-0.759606	-0.13164	0	0	-1.35767	0.175	0	H03AA Thyroid hormones	0.893
CAD	C	p6m	R03BA	-0.15118	0.22667	0	0	-0.525921	0.599	0	R03BA Glucocorticoids	0.893
CAD	D	p6m	A02BC	0.288224	0.488806	0	-1	-0.441443	0.659	0	A02BC Proton pump inhibitors [DG:DG01646]	1
CAD	D	p6m	A03AA	-13.4535	-13.5334	0	0	6.89458e-05	1	0	A03AA Synthetic anticholinergics, esters with tertiary amino group	1
CAD	D	p6m	A10AE	0.942081	0.938775	0	0	0.00267585	0.998	0	A10AE Insulins and analogues for injection, long-acting	1
CAD	D	p6m	A10BA	-0.396378	-0.166904	0	0	-0.268088	0.789	0	A10BA Biguanides [DG:DG01684]	1
CAD	D	p6m	B01AC	0.410512	0.0323829	0	0	0.741879	0.458	0	B01AC Platelet aggregation inhibitors excl. heparin	1
CAD	D	p6m	C07AB	-0.0394867	0.597392	0	-1	-1.32516	0.185	0	C07AB Beta blocking AGE>70nts, selective	1
CAD	D	p6m	C08CA	-1.01097	0.0788883	0	0	-1.50372	0.133	0	C08CA Dihydropyridine derivatives [DG:DG01928]	1
CAD	D	p6m	C09AA	-0.0970956	-0.507594	0	0	0.76362	0.445	0	C09AA ACE inhibitors, plain [DG:DG01501]	1
CAD	D	p6m	C09CA	-0.0147998	-0.0437889	0	0	0.0459887	0.963	0	C09CA Angiotensin II receptor blockers, plain [DG:DG01495]	1
CAD	D	p6m	C10AA	-0.257555	-0.0856417	0	0	-0.380755	0.703	0	C10AA HMG CoA reductase inhibitors [DG:DG01660]	1
CAD	D	p6m	G03CA	-13.2539	-0.0338771	0	0	-0.0165366	0.987	0	G03CA Natural and semisynthetic estrogens, plain	1
CAD	D	p6m	G04CB	-0.100859	-0.892286	0	0	0.669999	0.503	0	G04CB Testosterone-5-alpha reductase inhibitors	1
CAD	D	p6m	H03AA	-0.465417	0.558128	0	0	-1.13364	0.257	0	H03AA Thyroid hormones	1
CAD	D	p6m	R03BA	-12.6457	-0.238906	0	0	-0.0186012	0.985	0	R03BA Glucocorticoids	1
CAD	E	p6m	A02BC	0.214977	0.400496	0	-1	-1.37226	0.17	0	A02BC Proton pump inhibitors [DG:DG01646]	0.52
CAD	E	p6m	A03AA	-0.316661	0.302746	0	0	-0.798003	0.425	0	A03AA Synthetic anticholinergics, esters with tertiary amino group	0.588
CAD	E	p6m	A10AE	-0.0673006	-0.281439	0	0	0.365129	0.715	0	A10AE Insulins and analogues for injection, long-acting	0.715
CAD	E	p6m	A10BA	-0.142909	0.169494	0	0	-1.24806	0.212	0	A10BA Biguanides [DG:DG01684]	0.52
CAD	E	p6m	B01AC	0.120101	0.300592	0	-1	-1.23056	0.218	0	B01AC Platelet aggregation inhibitors excl. heparin	0.52
CAD	E	p6m	C07AB	-0.185246	0.227807	0	-1	-2.73038	0.00633	1	C07AB Beta blocking AGE>70nts, selective	0.0886
CAD	E	p6m	C08CA	-0.00238626	0.128094	0	-1	-0.73635	0.462	0	C08CA Dihydropyridine derivatives [DG:DG01928]	0.588
CAD	E	p6m	C09AA	-0.11795	0.000959548	0	0	-0.778385	0.436	0	C09AA ACE inhibitors, plain [DG:DG01501]	0.588
CAD	E	p6m	C09CA	-0.0366429	0.0838299	0	0	-0.619701	0.535	0	C09CA Angiotensin II receptor blockers, plain [DG:DG01495]	0.624
CAD	E	p6m	C10AA	-0.0125261	0.152654	0	-1	-1.21948	0.223	0	C10AA HMG CoA reductase inhibitors [DG:DG01660]	0.52
CAD	E	p6m	G03CA	-0.0166067	0.210311	0	-1	-0.39852	0.69	0	G03CA Natural and semisynthetic estrogens, plain	0.715
CAD	E	p6m	G04CB	0.174539	-0.141095	0	0	0.889119	0.374	0	G04CB Testosterone-5-alpha reductase inhibitors	0.588
CAD	E	p6m	H03AA	-0.206986	0.0383887	0	0	-0.929137	0.353	0	H03AA Thyroid hormones	0.588
CAD	E	p6m	R03BA	-0.0103537	0.55159	0	-1	-1.21852	0.223	0	R03BA Glucocorticoids	0.52
CAD	F	p6m	A02BC	-0.216241	-0.327919	0	1	0.787888	0.431	0	A02BC Proton pump inhibitors [DG:DG01646]	0.905
CAD	F	p6m	A03AA	-0.943341	-0.348033	0	0	-0.744138	0.457	0	A03AA Synthetic anticholinergics, esters with tertiary amino group	0.905
CAD	F	p6m	A10AE	-0.371807	-0.710526	0	1	0.545927	0.585	0	A10AE Insulins and analogues for injection, long-acting	0.905
CAD	F	p6m	A10BA	-0.120427	0.0705128	0	0	-0.711194	0.477	0	A10BA Biguanides [DG:DG01684]	0.905
CAD	F	p6m	B01AC	-0.0977549	-0.134635	0	0	0.236283	0.813	0	B01AC Platelet aggregation inhibitors excl. heparin	0.905
CAD	F	p6m	C07AB	-0.362367	-0.205437	1	1	-0.979148	0.328	0	C07AB Beta blocking AGE>70nts, selective	0.905
CAD	F	p6m	C08CA	-0.10344	-0.0811872	0	0	-0.118775	0.905	0	C08CA Dihydropyridine derivatives [DG:DG01928]	0.905
CAD	F	p6m	C09AA	-0.221095	-0.139918	0	1	-0.501434	0.616	0	C09AA ACE inhibitors, plain [DG:DG01501]	0.905
CAD	F	p6m	C09CA	-0.12926	-0.178572	0	1	0.240191	0.81	0	C09CA Angiotensin II receptor blockers, plain [DG:DG01495]	0.905
CAD	F	p6m	C10AA	-0.195737	-0.0373438	0	0	-1.09416	0.274	0	C10AA HMG CoA reductase inhibitors [DG:DG01660]	0.905
CAD	F	p6m	G03CA	-0.546043	-0.458691	0	1	-0.148269	0.882	0	G03CA Natural and semisynthetic estrogens, plain	0.905
CAD	F	p6m	G04CB	-0.0651925	-0.572288	0	1	1.36374	0.173	0	G04CB Testosterone-5-alpha reductase inhibitors	0.905
CAD	F	p6m	H03AA	-0.329026	-0.210933	0	1	-0.426915	0.669	0	H03AA Thyroid hormones	0.905
CAD	F	p6m	R03BA	-0.357381	-0.0899935	0	0	-0.555283	0.579	0	R03BA Glucocorticoids	0.905
CAD	G	p6m	A02BC	-0.267354	-0.366088	0	1	0.493363	0.622	0	A02BC Proton pump inhibitors [DG:DG01646]	0.97
CAD	G	p6m	A03AA	-1.80816	-0.0830223	0	0	-1.02689	0.304	0	A03AA Synthetic anticholinergics, esters with tertiary amino group	0.97
CAD	G	p6m	A10AE	-0.248061	-0.219099	0	0	-0.0381755	0.97	0	A10AE Insulins and analogues for injection, long-acting	0.97
CAD	G	p6m	A10BA	-0.23344	-0.119345	0	0	-0.319895	0.749	0	A10BA Biguanides [DG:DG01684]	0.97
CAD	G	p6m	B01AC	-0.202318	-0.238386	0	0	0.159654	0.873	0	B01AC Platelet aggregation inhibitors excl. heparin	0.97
CAD	G	p6m	C07AB	-0.496461	-0.169263	1	0	-1.42031	0.156	0	C07AB Beta blocking AGE>70nts, selective	0.97
CAD	G	p6m	C08CA	-0.262977	-0.220354	0	1	-0.160248	0.873	0	C08CA Dihydropyridine derivatives [DG:DG01928]	0.97
CAD	G	p6m	C09AA	-0.393308	-0.383779	0	1	-0.0397722	0.968	0	C09AA ACE inhibitors, plain [DG:DG01501]	0.97
CAD	G	p6m	C09CA	-0.385163	-0.312595	0	1	-0.236067	0.813	0	C09CA Angiotensin II receptor blockers, plain [DG:DG01495]	0.97
CAD	G	p6m	C10AA	-0.375587	-0.430614	1	1	0.270002	0.787	0	C10AA HMG CoA reductase inhibitors [DG:DG01660]	0.97
CAD	G	p6m	G03CA	-0.405408	-0.354247	0	0	-0.061074	0.951	0	G03CA Natural and semisynthetic estrogens, plain	0.97
CAD	G	p6m	G04CB	-0.320854	-0.602138	0	1	0.527852	0.598	0	G04CB Testosterone-5-alpha reductase inhibitors	0.97
CAD	G	p6m	H03AA	-0.889353	-0.360408	1	1	-1.12442	0.261	0	H03AA Thyroid hormones	0.97
CAD	G	p6m	R03BA	-0.506583	-0.370707	0	0	-0.185525	0.853	0	R03BA Glucocorticoids	0.97
CAD	H	p6m	A02BC	-0.0869293	-0.0506071	0	0	-0.0796506	0.937	0	A02BC Proton pump inhibitors [DG:DG01646]	1
CAD	H	p6m	A03AA	-13.6562	-14.0682	0	0	0.000364146	1	0	A03AA Synthetic anticholinergics, esters with tertiary amino group	1
CAD	H	p6m	A10AE	0.948925	0.490581	0	0	0.363932	0.716	0	A10AE Insulins and analogues for injection, long-acting	1
CAD	H	p6m	A10BA	-0.452796	-0.228742	0	0	-0.257091	0.797	0	A10BA Biguanides [DG:DG01684]	1
CAD	H	p6m	B01AC	0.245559	-0.16651	0	0	0.799294	0.424	0	B01AC Platelet aggregation inhibitors excl. heparin	1
CAD	H	p6m	C07AB	-0.203231	0.34882	0	0	-1.12869	0.259	0	C07AB Beta blocking AGE>70nts, selective	1
CAD	H	p6m	C08CA	-1.08813	-0.0319583	0	0	-1.44488	0.148	0	C08CA Dihydropyridine derivatives [DG:DG01928]	1
CAD	H	p6m	C09AA	-0.160859	-0.546289	0	0	0.709305	0.478	0	C09AA ACE inhibitors, plain [DG:DG01501]	1
CAD	H	p6m	C09CA	-0.102045	-0.212368	0	0	0.172725	0.863	0	C09CA Angiotensin II receptor blockers, plain [DG:DG01495]	1
CAD	H	p6m	C10AA	-0.42031	-0.226187	0	0	-0.421401	0.673	0	C10AA HMG CoA reductase inhibitors [DG:DG01660]	1
CAD	H	p6m	G03CA	-13.5886	-0.584902	0	0	-0.0163135	0.987	0	G03CA Natural and semisynthetic estrogens, plain	1
CAD	H	p6m	G04CB	-0.238071	-1.25734	0	0	0.852157	0.394	0	G04CB Testosterone-5-alpha reductase inhibitors	1
CAD	H	p6m	H03AA	-0.598645	0.435948	0	0	-1.13463	0.257	0	H03AA Thyroid hormones	1
CAD	H	p6m	R03BA	-14.2633	-0.714752	0	0	-0.0120685	0.99	0	R03BA Glucocorticoids	1
Dementia	A	p6m	A02BC	-1.13377	1.00585	0	-1	-1.89405	0.0582	0	A02BC Proton pump inhibitors [DG:DG01646]	0.515
Dementia	A	p6m	A10AE	4.46745	-0.0914171	0	0	0.938324	0.348	0	A10AE Insulins and analogues for injection, long-acting	0.997
Dementia	A	p6m	A10BA	0.391837	0.208387	0	0	0.0983296	0.922	0	A10BA Biguanides [DG:DG01684]	0.997
Dementia	A	p6m	B01AC	0.816549	0.352261	0	0	0.290676	0.771	0	B01AC Platelet aggregation inhibitors excl. heparin	0.997
Dementia	A	p6m	C07AB	1.85879	-0.240289	0	0	1.26677	0.205	0	C07AB Beta blocking AGE>70nts, selective	0.888
Dementia	A	p6m	C08CA	1.01974	-0.0488589	0	0	0.566894	0.571	0	C08CA Dihydropyridine derivatives [DG:DG01928]	0.997
Dementia	A	p6m	C09AA	-0.639327	-0.044019	0	0	-0.351714	0.725	0	C09AA ACE inhibitors, plain [DG:DG01501]	0.997
Dementia	A	p6m	C09CA	0.948996	-0.241834	0	1	0.559164	0.576	0	C09CA Angiotensin II receptor blockers, plain [DG:DG01495]	0.997
Dementia	A	p6m	C10AA	2.83928	-0.186741	0	0	1.75483	0.0793	0	C10AA HMG CoA reductase inhibitors [DG:DG01660]	0.515
Dementia	A	p6m	G03CA	16.4587	-0.302944	0	0	0.00416395	0.997	0	G03CA Natural and semisynthetic estrogens, plain	0.997
Dementia	A	p6m	G04CB	-0.207503	-0.594431	0	1	0.127248	0.899	0	G04CB Testosterone-5-alpha reductase inhibitors	0.997
Dementia	A	p6m	H03AA	0.0232094	0.0759733	0	0	-0.0337025	0.973	0	H03AA Thyroid hormones	0.997
Dementia	A	p6m	R03BA	-14.275	1.17265	0	-1	-0.004108	0.997	0	R03BA Glucocorticoids	0.997
Dementia	B	p6m	A02BC	-1.07028	1.03082	0	-1	-1.58939	0.112	0	A02BC Proton pump inhibitors [DG:DG01646]	0.364
Dementia	B	p6m	A10AE	6.53395	0.274917	0	0	0.859147	0.39	0	A10AE Insulins and analogues for injection, long-acting	0.845
Dementia	B	p6m	A10BA	0.917778	-14.2273	0	0	0.0218217	0.983	0	A10BA Biguanides [DG:DG01684]	0.999
Dementia	B	p6m	B01AC	1.05818	0.646539	0	0	0.226114	0.821	0	B01AC Platelet aggregation inhibitors excl. heparin	0.999
Dementia	B	p6m	C07AB	5.27883	-0.159944	-1	0	2.06352	0.0391	-1	C07AB Beta blocking AGE>70nts, selective	0.364
Dementia	B	p6m	C08CA	1.05506	1.25993	0	0	-0.0983818	0.922	0	C08CA Dihydropyridine derivatives [DG:DG01928]	0.999
Dementia	B	p6m	C09AA	0.941417	0.424354	0	0	0.26022	0.795	0	C09AA ACE inhibitors, plain [DG:DG01501]	0.999
Dementia	B	p6m	C09CA	5.62158	-0.101909	0	0	1.8206	0.0687	0	C09CA Angiotensin II receptor blockers, plain [DG:DG01495]	0.364
Dementia	B	p6m	C10AA	16.5978	-0.00170071	0	0	1.66928	0.0951	0	C10AA HMG CoA reductase inhibitors [DG:DG01660]	0.364
Dementia	B	p6m	G03CA	-17.4403	-0.08379	0	0	-0.0015862	0.999	0	G03CA Natural and semisynthetic estrogens, plain	0.999
Dementia	B	p6m	G04CB	0.101	-0.200202	0	0	0.0801975	0.936	0	G04CB Testosterone-5-alpha reductase inhibitors	0.999
Dementia	B	p6m	H03AA	1.70753	-0.43301	0	0	1.0773	0.281	0	H03AA Thyroid hormones	0.731
Dementia	B	p6m	R03BA	-15.3254	1.23932	0	-1	-0.00313338	0.997	0	R03BA Glucocorticoids	0.999
Dementia	C	p6m	A02BC	-0.314017	0.286178	0	-1	-0.992552	0.321	0	A02BC Proton pump inhibitors [DG:DG01646]	0.899
Dementia	C	p6m	A03AA	-14.7649	0.33387	0	0	-0.0063688	0.995	0	A03AA Synthetic anticholinergics, esters with tertiary amino group	0.995
Dementia	C	p6m	A10AE	2.38313	0.0139771	-1	0	2.0507	0.0403	-1	A10AE Insulins and analogues for injection, long-acting	0.564
Dementia	C	p6m	A10BA	1.41261	-0.106252	0	0	1.55514	0.12	0	A10BA Biguanides [DG:DG01684]	0.84
Dementia	C	p6m	B01AC	0.365578	0.0722176	0	0	0.512352	0.608	0	B01AC Platelet aggregation inhibitors excl. heparin	0.995
Dementia	C	p6m	C07AB	0.931232	0.0119154	0	0	1.33284	0.183	0	C07AB Beta blocking AGE>70nts, selective	0.854
Dementia	C	p6m	C08CA	-0.210707	-0.0545089	0	0	-0.207622	0.836	0	C08CA Dihydropyridine derivatives [DG:DG01928]	0.995
Dementia	C	p6m	C09AA	-0.0364141	-0.29734	0	1	0.30814	0.758	0	C09AA ACE inhibitors, plain [DG:DG01501]	0.995
Dementia	C	p6m	C09CA	0.801333	-0.144012	0	0	1.09342	0.274	0	C09CA Angiotensin II receptor blockers, plain [DG:DG01495]	0.899
Dementia	C	p6m	C10AA	0.190824	-0.252422	0	1	0.826337	0.409	0	C10AA HMG CoA reductase inhibitors [DG:DG01660]	0.954
Dementia	C	p6m	G03CA	0.992842	0.279803	0	0	0.334821	0.738	0	G03CA Natural and semisynthetic estrogens, plain	0.995
Dementia	C	p6m	G04CB	-0.299758	-0.153899	0	0	-0.092397	0.926	0	G04CB Testosterone-5-alpha reductase inhibitors	0.995
Dementia	C	p6m	H03AA	0.26321	-0.208281	0	0	0.569802	0.569	0	H03AA Thyroid hormones	0.995
Dementia	C	p6m	R03BA	-13.842	0.712404	0	0	-0.00636746	0.995	0	R03BA Glucocorticoids	0.995
Dementia	D	p6m	A02BC	-0.0302604	0.481593	0	-1	-0.619546	0.536	0	A02BC Proton pump inhibitors [DG:DG01646]	0.834
Dementia	D	p6m	A03AA	-15.5904	-13.5689	0	0	-0.00032612	1	0	A03AA Synthetic anticholinergics, esters with tertiary amino group	1
Dementia	D	p6m	A10AE	4.55424	0.403819	-1	0	2.01185	0.0442	-1	A10AE Insulins and analogues for injection, long-acting	0.216
Dementia	D	p6m	A10BA	1.89936	-0.521263	0	0	1.78694	0.0739	0	A10BA Biguanides [DG:DG01684]	0.259
Dementia	D	p6m	B01AC	1.14437	0.0591603	0	0	1.48056	0.139	0	B01AC Platelet aggregation inhibitors excl. heparin	0.324
Dementia	D	p6m	C07AB	2.20884	0.264539	-1	0	1.9931	0.0463	-1	C07AB Beta blocking AGE>70nts, selective	0.216
Dementia	D	p6m	C08CA	-0.0903767	-0.124458	0	0	0.0315281	0.975	0	C08CA Dihydropyridine derivatives [DG:DG01928]	1
Dementia	D	p6m	C09AA	0.127674	-0.410749	0	0	0.474823	0.635	0	C09AA ACE inhibitors, plain [DG:DG01501]	0.889
Dementia	D	p6m	C09CA	2.50159	-0.150175	-1	0	2.42373	0.0154	-1	C09CA Angiotensin II receptor blockers, plain [DG:DG01495]	0.216
Dementia	D	p6m	C10AA	1.0021	-0.231936	0	0	1.65929	0.0971	0	C10AA HMG CoA reductase inhibitors [DG:DG01660]	0.272
Dementia	D	p6m	G03CA	-15.9156	-0.199627	0	0	-0.00213921	0.998	0	G03CA Natural and semisynthetic estrogens, plain	1
Dementia	D	p6m	G04CB	0.521438	-0.729902	0	0	0.727014	0.467	0	G04CB Testosterone-5-alpha reductase inhibitors	0.817
Dementia	D	p6m	H03AA	1.18903	0.301776	0	0	0.89401	0.371	0	H03AA Thyroid hormones	0.742
Dementia	D	p6m	R03BA	-15.5848	1.21907	0	0	-0.00306496	0.998	0	R03BA Glucocorticoids	1
Dementia	E	p6m	A02BC	0.0162989	0.382644	0	-1	-0.869454	0.385	0	A02BC Proton pump inhibitors [DG:DG01646]	0.964
Dementia	E	p6m	A03AA	-15.1998	0.249821	0	0	-0.00629152	0.995	0	A03AA Synthetic anticholinergics, esters with tertiary amino group	0.995
Dementia	E	p6m	A10AE	1.60823	-0.33246	0	0	1.99946	0.0456	-1	A10AE Insulins and analogues for injection, long-acting	0.638
Dementia	E	p6m	A10BA	1.24362	0.109904	0	0	1.54497	0.122	0	A10BA Biguanides [DG:DG01684]	0.854
Dementia	E	p6m	B01AC	0.186213	0.250551	0	-1	-0.14359	0.886	0	B01AC Platelet aggregation inhibitors excl. heparin	0.995
Dementia	E	p6m	C07AB	0.261012	0.116172	0	0	0.263543	0.792	0	C07AB Beta blocking AGE>70nts, selective	0.995
Dementia	E	p6m	C08CA	-0.379077	0.118969	0	-1	-0.858612	0.391	0	C08CA Dihydropyridine derivatives [DG:DG01928]	0.964
Dementia	E	p6m	C09AA	0.237662	-0.0219936	0	0	0.451733	0.651	0	C09AA ACE inhibitors, plain [DG:DG01501]	0.995
Dementia	E	p6m	C09CA	0.187947	0.0695691	0	0	0.164938	0.869	0	C09CA Angiotensin II receptor blockers, plain [DG:DG01495]	0.995
Dementia	E	p6m	C10AA	-0.427001	0.139712	0	-1	-1.31488	0.189	0	C10AA HMG CoA reductase inhibitors [DG:DG01660]	0.882
Dementia	E	p6m	G03CA	0.271003	0.201595	0	-1	0.0335746	0.973	0	G03CA Natural and semisynthetic estrogens, plain	0.995
Dementia	E	p6m	G04CB	-0.0732899	-0.0597157	0	0	-0.0108625	0.991	0	G04CB Testosterone-5-alpha reductase inhibitors	0.995
Dementia	E	p6m	H03AA	0.201722	0.0162415	0	0	0.296389	0.767	0	H03AA Thyroid hormones	0.995
Dementia	E	p6m	R03BA	1.23925	0.058831	0	0	0.819055	0.413	0	R03BA Glucocorticoids	0.964
Dementia	F	p6m	A02BC	0.281155	-0.321244	0	1	1.1569	0.247	0	A02BC Proton pump inhibitors [DG:DG01646]	0.994
Dementia	F	p6m	A03AA	-16.1383	-0.405685	0	0	-0.00773768	0.994	0	A03AA Synthetic anticholinergics, esters with tertiary amino group	0.994
Dementia	F	p6m	A10AE	1.48978	-0.742384	0	1	1.76316	0.0779	0	A10AE Insulins and analogues for injection, long-acting	0.994
Dementia	F	p6m	A10BA	1.21132	0.0279065	0	0	1.22413	0.221	0	A10BA Biguanides [DG:DG01684]	0.994
Dementia	F	p6m	B01AC	0.250897	-0.134774	0	0	0.65172	0.515	0	B01AC Platelet aggregation inhibitors excl. heparin	0.994
Dementia	F	p6m	C07AB	-0.312935	-0.244721	0	1	-0.0971359	0.923	0	C07AB Beta blocking AGE>70nts, selective	0.994
Dementia	F	p6m	C08CA	-0.0135539	-0.0852599	0	0	0.0975702	0.922	0	C08CA Dihydropyridine derivatives [DG:DG01928]	0.994
Dementia	F	p6m	C09AA	-0.130697	-0.156617	0	1	0.0357977	0.971	0	C09AA ACE inhibitors, plain [DG:DG01501]	0.994
Dementia	F	p6m	C09CA	0.0579825	-0.174278	0	1	0.242835	0.808	0	C09CA Angiotensin II receptor blockers, plain [DG:DG01495]	0.994
Dementia	F	p6m	C10AA	-0.248943	-0.0566696	0	0	-0.358601	0.72	0	C10AA HMG CoA reductase inhibitors [DG:DG01660]	0.994
Dementia	F	p6m	G03CA	-0.954441	-0.463919	0	1	-0.221948	0.824	0	G03CA Natural and semisynthetic estrogens, plain	0.994
Dementia	F	p6m	G04CB	0.116864	-0.464195	0	1	0.380974	0.703	0	G04CB Testosterone-5-alpha reductase inhibitors	0.994
Dementia	F	p6m	H03AA	0.21328	-0.222367	0	1	0.564723	0.572	0	H03AA Thyroid hormones	0.994
Dementia	F	p6m	R03BA	0.756703	1.24572	0	-1	-0.215973	0.829	0	R03BA Glucocorticoids	0.994
Dementia	G	p6m	A02BC	-0.0691465	-0.353122	0	1	0.408999	0.683	0	A02BC Proton pump inhibitors [DG:DG01646]	0.956
Dementia	G	p6m	A03AA	-16.2041	-0.243201	0	0	-0.0070452	0.994	0	A03AA Synthetic anticholinergics, esters with tertiary amino group	0.995
Dementia	G	p6m	A10AE	2.31215	-0.402797	0	0	1.81821	0.069	0	A10AE Insulins and analogues for injection, long-acting	0.956
Dementia	G	p6m	A10BA	1.15811	-0.17829	0	0	1.09919	0.272	0	A10BA Biguanides [DG:DG01684]	0.956
Dementia	G	p6m	B01AC	0.36369	-0.252257	0	1	0.851397	0.395	0	B01AC Platelet aggregation inhibitors excl. heparin	0.956
Dementia	G	p6m	C07AB	0.249871	-0.282348	0	1	0.600387	0.548	0	C07AB Beta blocking AGE>70nts, selective	0.956
Dementia	G	p6m	C08CA	0.209318	-0.231131	0	1	0.464572	0.642	0	C08CA Dihydropyridine derivatives [DG:DG01928]	0.956
Dementia	G	p6m	C09AA	-0.376335	-0.387533	0	1	0.011259	0.991	0	C09AA ACE inhibitors, plain [DG:DG01501]	0.995
Dementia	G	p6m	C09CA	0.46313	-0.346103	0	1	0.679312	0.497	0	C09CA Angiotensin II receptor blockers, plain [DG:DG01495]	0.956
Dementia	G	p6m	C10AA	0.310301	-0.434143	0	1	1.15507	0.248	0	C10AA HMG CoA reductase inhibitors [DG:DG01660]	0.956
Dementia	G	p6m	G03CA	-0.445636	-0.365037	0	0	-0.0350832	0.972	0	G03CA Natural and semisynthetic estrogens, plain	0.995
Dementia	G	p6m	G04CB	0.310892	-0.521572	0	1	0.43884	0.661	0	G04CB Testosterone-5-alpha reductase inhibitors	0.956
Dementia	G	p6m	H03AA	0.0138283	-0.418939	0	1	0.43054	0.667	0	H03AA Thyroid hormones	0.956
Dementia	G	p6m	R03BA	-14.7475	2.02634	0	-1	-0.00613821	0.995	0	R03BA Glucocorticoids	0.995
Dementia	H	p6m	A02BC	0.370794	-0.0734787	0	0	0.479526	0.632	0	A02BC Proton pump inhibitors [DG:DG01646]	0.983
Dementia	H	p6m	A03AA	-17.0672	-14.1257	0	0	-0.000280528	1	0	A03AA Synthetic anticholinergics, esters with tertiary amino group	1
Dementia	H	p6m	A10AE	3.721	-0.0144121	0	0	1.5027	0.133	0	A10AE Insulins and analogues for injection, long-acting	0.462
Dementia	H	p6m	A10BA	1.76499	-0.528337	0	0	1.28348	0.199	0	A10BA Biguanides [DG:DG01684]	0.464
Dementia	H	p6m	B01AC	1.19072	-0.148759	0	0	1.47293	0.141	0	B01AC Platelet aggregation inhibitors excl. heparin	0.462
Dementia	H	p6m	C07AB	1.90824	0.0794536	0	0	1.38887	0.165	0	C07AB Beta blocking AGE>70nts, selective	0.462
Dementia	H	p6m	C08CA	0.544526	-0.238133	0	0	0.571805	0.567	0	C08CA Dihydropyridine derivatives [DG:DG01928]	0.983
Dementia	H	p6m	C09AA	-0.348385	-0.447337	0	0	0.0755435	0.94	0	C09AA ACE inhibitors, plain [DG:DG01501]	1
Dementia	H	p6m	C09CA	2.44816	-0.306648	0	0	1.71074	0.0871	0	C09CA Angiotensin II receptor blockers, plain [DG:DG01495]	0.462
Dementia	H	p6m	C10AA	1.28967	-0.376322	0	0	1.85572	0.0635	0	C10AA HMG CoA reductase inhibitors [DG:DG01660]	0.462
Dementia	H	p6m	G03CA	-18.674	0.735164	0	0	-0.00233843	0.998	0	G03CA Natural and semisynthetic estrogens, plain	1
Dementia	H	p6m	G04CB	1.19928	-0.772769	0	0	0.829475	0.407	0	G04CB Testosterone-5-alpha reductase inhibitors	0.814
Dementia	H	p6m	H03AA	1.59024	1.11202	0	-1	0.345776	0.73	0	H03AA Thyroid hormones	1
Dementia	H	p6m	R03BA	-18.3421	-12.7676	0	0	-0.000474152	1	0	R03BA Glucocorticoids	1
COPD	A	p6m	A02BC	0.792794	-0.127944	0	0	1.94035	0.0523	0	A02BC Proton pump inhibitors [DG:DG01646]	0.334
COPD	A	p6m	A10AE	-0.277733	0.21184	0	0	-0.153668	0.878	0	A10AE Insulins and analogues for injection, long-acting	0.924
COPD	A	p6m	A10BA	0.339508	0.539437	0	0	-0.186361	0.852	0	A10BA Biguanides [DG:DG01684]	0.924
COPD	A	p6m	B01AC	-0.179267	-0.392912	0	1	0.328008	0.743	0	B01AC Platelet aggregation inhibitors excl. heparin	0.924
COPD	A	p6m	C07AB	0.218767	0.0602123	0	0	0.188704	0.85	0	C07AB Beta blocking AGE>70nts, selective	0.924
COPD	A	p6m	C08CA	0.889219	-0.0109131	0	0	1.52477	0.127	0	C08CA Dihydropyridine derivatives [DG:DG01928]	0.413
COPD	A	p6m	C09AA	-0.0052516	-0.137522	0	0	0.156169	0.876	0	C09AA ACE inhibitors, plain [DG:DG01501]	0.924
COPD	A	p6m	C09CA	-0.680946	-0.398615	0	1	-0.396281	0.692	0	C09CA Angiotensin II receptor blockers, plain [DG:DG01495]	0.924
COPD	A	p6m	C10AA	-0.278449	-0.230886	0	0	-0.0958045	0.924	0	C10AA HMG CoA reductase inhibitors [DG:DG01660]	0.924
COPD	A	p6m	G03CA	0.686217	0.448772	0	0	0.144877	0.885	0	G03CA Natural and semisynthetic estrogens, plain	0.924
COPD	A	p6m	G04CB	0.624114	0.044105	0	0	0.294412	0.768	0	G04CB Testosterone-5-alpha reductase inhibitors	0.924
COPD	A	p6m	H03AA	-0.745707	1.21526	0	-1	-2.49256	0.0127	1	H03AA Thyroid hormones	0.165
COPD	A	p6m	R03BA	-0.348301	2.46949	0	0	-1.76832	0.077	0	R03BA Glucocorticoids	0.334
COPD	B	p6m	A02BC	0.733995	0.210712	0	0	0.581429	0.561	0	A02BC Proton pump inhibitors [DG:DG01646]	0.999
COPD	B	p6m	A10AE	-18.5277	-14.1992	0	0	-0.000771575	0.999	0	A10AE Insulins and analogues for injection, long-acting	0.999
COPD	B	p6m	A10BA	0.351209	1.26901	0	0	-0.507146	0.612	0	A10BA Biguanides [DG:DG01684]	0.999
COPD	B	p6m	B01AC	-1.01915	-0.31575	0	0	-0.491245	0.623	0	B01AC Platelet aggregation inhibitors excl. heparin	0.999
COPD	B	p6m	C07AB	-0.166579	1.41611	0	0	-1.04188	0.297	0	C07AB Beta blocking AGE>70nts, selective	0.999
COPD	B	p6m	C08CA	0.98578	0.635394	0	-1	0.314312	0.753	0	C08CA Dihydropyridine derivatives [DG:DG01928]	0.999
COPD	B	p6m	C09AA	-1.2882	-0.632437	0	0	-0.324052	0.746	0	C09AA ACE inhibitors, plain [DG:DG01501]	0.999
COPD	B	p6m	C09CA	0.487892	-0.0350254	0	0	0.408464	0.683	0	C09CA Angiotensin II receptor blockers, plain [DG:DG01495]	0.999
COPD	B	p6m	C10AA	-0.185797	0.0228413	0	0	-0.216336	0.829	0	C10AA HMG CoA reductase inhibitors [DG:DG01660]	0.999
COPD	B	p6m	G03CA	3.6134	0.736032	0	0	1.29618	0.195	0	G03CA Natural and semisynthetic estrogens, plain	0.999
COPD	B	p6m	G04CB	0.750242	-14.2462	0	0	0.0273108	0.978	0	G04CB Testosterone-5-alpha reductase inhibitors	0.999
COPD	B	p6m	H03AA	1.80367	1.29898	0	-1	0.3933	0.694	0	H03AA Thyroid hormones	0.999
COPD	B	p6m	R03BA	-16.6744	-13.386	0	0	-0.000747681	0.999	0	R03BA Glucocorticoids	0.999
COPD	C	p6m	A02BC	0.518248	0.259912	0	-1	0.889353	0.374	0	A02BC Proton pump inhibitors [DG:DG01646]	0.925
COPD	C	p6m	A03AA	-13.1811	0.425191	0	0	-0.0268065	0.979	0	A03AA Synthetic anticholinergics, esters with tertiary amino group	0.979
COPD	C	p6m	A10AE	-0.116255	0.140577	0	0	-0.177494	0.859	0	A10AE Insulins and analogues for injection, long-acting	0.925
COPD	C	p6m	A10BA	0.161623	-0.0945849	0	0	0.479416	0.632	0	A10BA Biguanides [DG:DG01684]	0.925
COPD	C	p6m	B01AC	-0.160068	0.104493	0	0	-0.684941	0.493	0	B01AC Platelet aggregation inhibitors excl. heparin	0.925
COPD	C	p6m	C07AB	-0.169481	0.0490796	0	0	-0.520083	0.603	0	C07AB Beta blocking AGE>70nts, selective	0.925
COPD	C	p6m	C08CA	0.435004	-0.0958161	0	0	1.55066	0.121	0	C08CA Dihydropyridine derivatives [DG:DG01928]	0.925
COPD	C	p6m	C09AA	-0.0380674	-0.308744	0	1	0.71417	0.475	0	C09AA ACE inhibitors, plain [DG:DG01501]	0.925
COPD	C	p6m	C09CA	-0.423138	-0.117215	0	0	-0.620475	0.535	0	C09CA Angiotensin II receptor blockers, plain [DG:DG01495]	0.925
COPD	C	p6m	C10AA	-0.304222	-0.238454	0	1	-0.219343	0.826	0	C10AA HMG CoA reductase inhibitors [DG:DG01660]	0.925
COPD	C	p6m	G03CA	0.842217	0.250513	0	0	0.841874	0.4	0	G03CA Natural and semisynthetic estrogens, plain	0.925
COPD	C	p6m	G04CB	0.0359243	-0.171295	0	0	0.264208	0.792	0	G04CB Testosterone-5-alpha reductase inhibitors	0.925
COPD	C	p6m	H03AA	-0.477212	-0.181396	0	0	-0.547089	0.584	0	H03AA Thyroid hormones	0.925
COPD	C	p6m	R03BA	0.038807	0.207561	0	0	-0.239173	0.811	0	R03BA Glucocorticoids	0.925
COPD	D	p6m	A02BC	1.03179	0.393961	0	0	0.864819	0.387	0	A02BC Proton pump inhibitors [DG:DG01646]	1
COPD	D	p6m	A03AA	-14.8563	-13.6437	0	0	-0.000391134	1	0	A03AA Synthetic anticholinergics, esters with tertiary amino group	1
COPD	D	p6m	A10AE	-14.1553	1.02524	0	0	-0.00660001	0.995	0	A10AE Insulins and analogues for injection, long-acting	1
COPD	D	p6m	A10BA	-0.243093	-0.233119	0	0	-0.00770209	0.994	0	A10BA Biguanides [DG:DG01684]	1
COPD	D	p6m	B01AC	-0.595267	0.28215	0	0	-0.854867	0.393	0	B01AC Platelet aggregation inhibitors excl. heparin	1
COPD	D	p6m	C07AB	-0.468774	0.470923	0	-1	-0.849155	0.396	0	C07AB Beta blocking AGE>70nts, selective	1
COPD	D	p6m	C08CA	0.510513	-0.174492	0	0	0.815255	0.415	0	C08CA Dihydropyridine derivatives [DG:DG01928]	1
COPD	D	p6m	C09AA	-0.689045	-0.319915	0	0	-0.335852	0.737	0	C09AA ACE inhibitors, plain [DG:DG01501]	1
COPD	D	p6m	C09CA	0.40759	-0.0430035	0	0	0.455295	0.649	0	C09CA Angiotensin II receptor blockers, plain [DG:DG01495]	1
COPD	D	p6m	C10AA	-0.2862	-0.117256	0	0	-0.230626	0.818	0	C10AA HMG CoA reductase inhibitors [DG:DG01660]	1
COPD	D	p6m	G03CA	2.21075	-13.6218	-1	0	0.0344666	0.973	0	G03CA Natural and semisynthetic estrogens, plain	1
COPD	D	p6m	G04CB	-0.24232	-0.657416	0	0	0.224556	0.822	0	G04CB Testosterone-5-alpha reductase inhibitors	1
COPD	D	p6m	H03AA	1.27252	0.27358	0	0	1.1478	0.251	0	H03AA Thyroid hormones	1
COPD	D	p6m	R03BA	-14.584	-0.297303	0	0	-0.00753045	0.994	0	R03BA Glucocorticoids	1
COPD	E	p6m	A02BC	0.414996	0.376912	-1	-1	0.196659	0.844	0	A02BC Proton pump inhibitors [DG:DG01646]	0.954
COPD	E	p6m	A03AA	-13.914	0.321445	0	0	-0.0276103	0.978	0	A03AA Synthetic anticholinergics, esters with tertiary amino group	0.978
COPD	E	p6m	A10AE	-0.535252	-0.220884	0	0	-0.256078	0.798	0	A10AE Insulins and analogues for injection, long-acting	0.954
COPD	E	p6m	A10BA	0.0737933	0.126558	0	0	-0.143082	0.886	0	A10BA Biguanides [DG:DG01684]	0.954
COPD	E	p6m	B01AC	0.125609	0.256005	0	-1	-0.503931	0.614	0	B01AC Platelet aggregation inhibitors excl. heparin	0.954
COPD	E	p6m	C07AB	-0.0497342	0.12824	0	0	-0.617978	0.537	0	C07AB Beta blocking AGE>70nts, selective	0.954
COPD	E	p6m	C08CA	0.203652	0.110191	0	-1	0.378262	0.705	0	C08CA Dihydropyridine derivatives [DG:DG01928]	0.954
COPD	E	p6m	C09AA	0.154856	-0.0271469	0	0	0.736194	0.462	0	C09AA ACE inhibitors, plain [DG:DG01501]	0.954
COPD	E	p6m	C09CA	0.113201	0.0598431	0	0	0.180784	0.857	0	C09CA Angiotensin II receptor blockers, plain [DG:DG01495]	0.954
COPD	E	p6m	C10AA	-0.000479957	0.139275	0	-1	-0.696477	0.486	0	C10AA HMG CoA reductase inhibitors [DG:DG01660]	0.954
COPD	E	p6m	G03CA	0.443643	0.19538	0	-1	0.458505	0.647	0	G03CA Natural and semisynthetic estrogens, plain	0.954
COPD	E	p6m	G04CB	-0.478011	-0.0380539	0	0	-0.644646	0.519	0	G04CB Testosterone-5-alpha reductase inhibitors	0.954
COPD	E	p6m	H03AA	-0.0653262	0.0224473	0	0	-0.263719	0.792	0	H03AA Thyroid hormones	0.954
COPD	E	p6m	R03BA	0.140073	0.536574	0	-1	-0.87934	0.379	0	R03BA Glucocorticoids	0.954
COPD	F	p6m	A02BC	-0.128609	-0.326505	0	1	0.97662	0.329	0	A02BC Proton pump inhibitors [DG:DG01646]	0.982
COPD	F	p6m	A03AA	-14.3878	-0.327024	0	0	-0.0290866	0.977	0	A03AA Synthetic anticholinergics, esters with tertiary amino group	0.982
COPD	F	p6m	A10AE	-0.943673	-0.626091	0	1	-0.25057	0.802	0	A10AE Insulins and analogues for injection, long-acting	0.982
COPD	F	p6m	A10BA	0.0880733	0.0436985	0	0	0.114283	0.909	0	A10BA Biguanides [DG:DG01684]	0.982
COPD	F	p6m	B01AC	-0.0170097	-0.135484	0	0	0.431649	0.666	0	B01AC Platelet aggregation inhibitors excl. heparin	0.982
COPD	F	p6m	C07AB	-0.340391	-0.238281	0	1	-0.340588	0.733	0	C07AB Beta blocking AGE>70nts, selective	0.982
COPD	F	p6m	C08CA	0.291584	-0.102539	0	0	1.47035	0.141	0	C08CA Dihydropyridine derivatives [DG:DG01928]	0.982
COPD	F	p6m	C09AA	0.120079	-0.168703	0	1	1.09443	0.274	0	C09AA ACE inhibitors, plain [DG:DG01501]	0.982
COPD	F	p6m	C09CA	0.259093	-0.198925	0	1	1.42449	0.154	0	C09CA Angiotensin II receptor blockers, plain [DG:DG01495]	0.982
COPD	F	p6m	C10AA	-0.0616487	-0.0568588	0	0	-0.0223515	0.982	0	C10AA HMG CoA reductase inhibitors [DG:DG01660]	0.982
COPD	F	p6m	G03CA	-0.168315	-0.472042	0	1	0.529314	0.597	0	G03CA Natural and semisynthetic estrogens, plain	0.982
COPD	F	p6m	G04CB	-0.845	-0.435179	0	1	-0.582405	0.56	0	G04CB Testosterone-5-alpha reductase inhibitors	0.982
COPD	F	p6m	H03AA	-0.0264388	-0.228762	0	1	0.575669	0.565	0	H03AA Thyroid hormones	0.982
COPD	F	p6m	R03BA	-0.142637	-0.104863	0	0	-0.0790883	0.937	0	R03BA Glucocorticoids	0.982
COPD	G	p6m	A02BC	0.071329	-0.3778	0	1	1.51946	0.129	0	A02BC Proton pump inhibitors [DG:DG01646]	0.903
COPD	G	p6m	A03AA	-14.4819	-0.14745	0	0	-0.0179592	0.986	0	A03AA Synthetic anticholinergics, esters with tertiary amino group	0.999
COPD	G	p6m	A10AE	-0.336609	-0.241197	0	0	-0.0642463	0.949	0	A10AE Insulins and analogues for injection, long-acting	0.999
COPD	G	p6m	A10BA	0.186495	-0.173813	0	0	0.661607	0.508	0	A10BA Biguanides [DG:DG01684]	0.999
COPD	G	p6m	B01AC	-0.363856	-0.225556	0	1	-0.34507	0.73	0	B01AC Platelet aggregation inhibitors excl. heparin	0.999
COPD	G	p6m	C07AB	-0.425001	-0.257591	0	1	-0.387702	0.698	0	C07AB Beta blocking AGE>70nts, selective	0.999
COPD	G	p6m	C08CA	0.545925	-0.28103	0	1	2.28091	0.0226	-1	C08CA Dihydropyridine derivatives [DG:DG01928]	0.316
COPD	G	p6m	C09AA	-0.0203373	-0.411202	0	1	0.994126	0.32	0	C09AA ACE inhibitors, plain [DG:DG01501]	0.999
COPD	G	p6m	C09CA	-0.30193	-0.336011	0	1	0.0662689	0.947	0	C09CA Angiotensin II receptor blockers, plain [DG:DG01495]	0.999
COPD	G	p6m	C10AA	-0.324727	-0.424786	0	1	0.319623	0.749	0	C10AA HMG CoA reductase inhibitors [DG:DG01660]	0.999
COPD	G	p6m	G03CA	0.245353	-0.400508	0	1	0.875205	0.381	0	G03CA Natural and semisynthetic estrogens, plain	0.999
COPD	G	p6m	G04CB	-0.352883	-0.528143	0	1	0.21665	0.828	0	G04CB Testosterone-5-alpha reductase inhibitors	0.999
COPD	G	p6m	H03AA	-0.413336	-0.414292	0	1	0.0017186	0.999	0	H03AA Thyroid hormones	0.999
COPD	G	p6m	R03BA	-0.264701	-0.387525	0	0	0.16811	0.866	0	R03BA Glucocorticoids	0.999
COPD	H	p6m	A02BC	0.561427	-0.0991831	0	0	0.878471	0.38	0	A02BC Proton pump inhibitors [DG:DG01646]	1
COPD	H	p6m	A03AA	-15.0314	-14.1668	0	0	-0.000264141	1	0	A03AA Synthetic anticholinergics, esters with tertiary amino group	1
COPD	H	p6m	A10AE	-15.9868	0.735011	0	0	-0.00446436	0.996	0	A10AE Insulins and analogues for injection, long-acting	1
COPD	H	p6m	A10BA	-0.0651901	-0.343601	0	0	0.218787	0.827	0	A10BA Biguanides [DG:DG01684]	1
COPD	H	p6m	B01AC	-0.701803	0.0694945	0	0	-0.730738	0.465	0	B01AC Platelet aggregation inhibitors excl. heparin	1
COPD	H	p6m	C07AB	-0.697592	0.230142	0	0	-0.836944	0.403	0	C07AB Beta blocking AGE>70nts, selective	1
COPD	H	p6m	C08CA	0.642555	-0.261175	0	0	1.02155	0.307	0	C08CA Dihydropyridine derivatives [DG:DG01928]	1
COPD	H	p6m	C09AA	-0.588731	-0.415796	0	0	-0.154117	0.878	0	C09AA ACE inhibitors, plain [DG:DG01501]	1
COPD	H	p6m	C09CA	0.382552	-0.212972	0	0	0.574711	0.565	0	C09CA Angiotensin II receptor blockers, plain [DG:DG01495]	1
COPD	H	p6m	C10AA	-0.258603	-0.249221	0	0	-0.0125189	0.99	0	C10AA HMG CoA reductase inhibitors [DG:DG01660]	1
COPD	H	p6m	G03CA	2.21897	-14.3614	0	0	0.0330247	0.974	0	G03CA Natural and semisynthetic estrogens, plain	1
COPD	H	p6m	G04CB	-0.407668	-0.99363	0	0	0.311942	0.755	0	G04CB Testosterone-5-alpha reductase inhibitors	1
COPD	H	p6m	H03AA	1.29321	0.0844886	0	0	1.35402	0.176	0	H03AA Thyroid hormones	1
COPD	H	p6m	R03BA	-15.2555	-0.803401	0	0	-0.00708288	0.994	0	R03BA Glucocorticoids	1
Depression	A	p6m	A02BC	0.284992	-0.147185	0	0	1.5379	0.124	0	A02BC Proton pump inhibitors [DG:DG01646]	0.579
Depression	A	p6m	A03AA	0.102275	0.278517	0	0	-0.159645	0.873	0	A03AA Synthetic anticholinergics, esters with tertiary amino group	0.982
Depression	A	p6m	A10AE	15.3245	0.128959	0	0	0.0223618	0.982	0	A10AE Insulins and analogues for injection, long-acting	0.982
Depression	A	p6m	A10BA	-0.786643	-0.350998	0	0	-0.631474	0.528	0	A10BA Biguanides [DG:DG01684]	0.982
Depression	A	p6m	B01AC	-1.26712	-0.121918	1	0	-2.1052	0.0353	1	B01AC Platelet aggregation inhibitors excl. heparin	0.247
Depression	A	p6m	C07AB	-0.0380392	-0.0235581	0	0	-0.0300866	0.976	0	C07AB Beta blocking AGE>70nts, selective	0.982
Depression	A	p6m	C08CA	-0.193183	-0.243452	0	1	0.129392	0.897	0	C08CA Dihydropyridine derivatives [DG:DG01928]	0.982
Depression	A	p6m	C09AA	-0.136834	-0.416859	0	1	0.713159	0.476	0	C09AA ACE inhibitors, plain [DG:DG01501]	0.982
Depression	A	p6m	C09CA	-0.333578	-0.265899	0	0	-0.122439	0.903	0	C09CA Angiotensin II receptor blockers, plain [DG:DG01495]	0.982
Depression	A	p6m	C10AA	-0.528996	-0.559786	0	1	0.0956657	0.924	0	C10AA HMG CoA reductase inhibitors [DG:DG01660]	0.982
Depression	A	p6m	G03CA	0.227542	0.0546553	0	0	0.282859	0.777	0	G03CA Natural and semisynthetic estrogens, plain	0.982
Depression	A	p6m	G04CB	-2.0015	-0.108279	0	0	-1.04335	0.297	0	G04CB Testosterone-5-alpha reductase inhibitors	0.982
Depression	A	p6m	H03AA	-0.146207	-0.356869	0	1	0.438936	0.661	0	H03AA Thyroid hormones	0.982
Depression	A	p6m	R03BA	-0.605984	1.43052	0	-1	-2.36009	0.0183	1	R03BA Glucocorticoids	0.247
Depression	B	p6m	A02BC	-0.741368	0.389684	0	0	-1.5954	0.111	0	A02BC Proton pump inhibitors [DG:DG01646]	0.518
Depression	B	p6m	A03AA	-14.3228	-14.0926	0	0	-0.000120421	1	0	A03AA Synthetic anticholinergics, esters with tertiary amino group	1
Depression	B	p6m	A10AE	0.6548	0.966373	0	0	-0.154333	0.877	0	A10AE Insulins and analogues for injection, long-acting	1
Depression	B	p6m	A10BA	-0.0128673	-0.327342	0	0	0.23311	0.816	0	A10BA Biguanides [DG:DG01684]	1
Depression	B	p6m	B01AC	-0.928174	0.0958645	0	0	-0.987219	0.324	0	B01AC Platelet aggregation inhibitors excl. heparin	1
Depression	B	p6m	C07AB	-2.04308	0.731045	0	-1	-1.83965	0.0658	0	C07AB Beta blocking AGE>70nts, selective	0.461
Depression	B	p6m	C08CA	-0.529907	-0.00535764	0	0	-0.601772	0.547	0	C08CA Dihydropyridine derivatives [DG:DG01928]	1
Depression	B	p6m	C09AA	-0.774544	-0.0175416	0	0	-0.787616	0.431	0	C09AA ACE inhibitors, plain [DG:DG01501]	1
Depression	B	p6m	C09CA	-0.841604	0.107095	0	0	-0.814128	0.416	0	C09CA Angiotensin II receptor blockers, plain [DG:DG01495]	1
Depression	B	p6m	C10AA	-1.63609	0.101111	1	0	-2.10545	0.0353	1	C10AA HMG CoA reductase inhibitors [DG:DG01660]	0.461
Depression	B	p6m	G03CA	-15.1912	-0.228305	0	0	-0.0108833	0.991	0	G03CA Natural and semisynthetic estrogens, plain	1
Depression	B	p6m	G04CB	-15.077	-0.710824	0	0	-0.00606521	0.995	0	G04CB Testosterone-5-alpha reductase inhibitors	1
Depression	B	p6m	H03AA	0.251791	0.581008	0	0	-0.316029	0.752	0	H03AA Thyroid hormones	1
Depression	B	p6m	R03BA	-15.817	0.373368	0	0	-0.00901483	0.993	0	R03BA Glucocorticoids	1
Depression	C	p6m	A02BC	0.379116	0.264369	0	-1	0.548256	0.584	0	A02BC Proton pump inhibitors [DG:DG01646]	0.889
Depression	C	p6m	A03AA	0.0750175	0.396408	0	0	-0.397693	0.691	0	A03AA Synthetic anticholinergics, esters with tertiary amino group	0.889
Depression	C	p6m	A10AE	0.893227	-0.0677827	0	0	1.34603	0.178	0	A10AE Insulins and analogues for injection, long-acting	0.759
Depression	C	p6m	A10BA	0.11156	-0.0950237	0	0	0.504776	0.614	0	A10BA Biguanides [DG:DG01684]	0.889
Depression	C	p6m	B01AC	-0.567671	0.175711	0	0	-2.13821	0.0325	1	B01AC Platelet aggregation inhibitors excl. heparin	0.455
Depression	C	p6m	C07AB	-0.238512	0.0745651	0	0	-0.933787	0.35	0	C07AB Beta blocking AGE>70nts, selective	0.889
Depression	C	p6m	C08CA	0.11732	-0.0806647	0	0	0.71935	0.472	0	C08CA Dihydropyridine derivatives [DG:DG01928]	0.889
Depression	C	p6m	C09AA	0.0284354	-0.334076	0	1	1.26463	0.206	0	C09AA ACE inhibitors, plain [DG:DG01501]	0.759
Depression	C	p6m	C09CA	-0.194645	-0.128408	0	0	-0.174542	0.861	0	C09CA Angiotensin II receptor blockers, plain [DG:DG01495]	0.927
Depression	C	p6m	C10AA	-0.302147	-0.233053	0	1	-0.3025	0.762	0	C10AA HMG CoA reductase inhibitors [DG:DG01660]	0.889
Depression	C	p6m	G03CA	0.49796	0.23917	0	0	0.552124	0.581	0	G03CA Natural and semisynthetic estrogens, plain	0.889
Depression	C	p6m	G04CB	-1.97704	-0.0374364	0	0	-1.23378	0.217	0	G04CB Testosterone-5-alpha reductase inhibitors	0.759
Depression	C	p6m	H03AA	-0.106083	-0.214898	0	0	0.312634	0.755	0	H03AA Thyroid hormones	0.889
Depression	C	p6m	R03BA	0.141268	0.187145	0	0	-0.0714644	0.943	0	R03BA Glucocorticoids	0.943
Depression	D	p6m	A02BC	-0.534987	0.571647	0	-1	-1.71325	0.0867	0	A02BC Proton pump inhibitors [DG:DG01646]	0.405
Depression	D	p6m	A03AA	-14.1092	-13.59	0	0	-0.000347327	1	0	A03AA Synthetic anticholinergics, esters with tertiary amino group	1
Depression	D	p6m	A10AE	1.27249	0.850954	0	0	0.251483	0.801	0	A10AE Insulins and analogues for injection, long-acting	1
Depression	D	p6m	A10BA	0.110713	-0.256058	0	0	0.327274	0.743	0	A10BA Biguanides [DG:DG01684]	1
Depression	D	p6m	B01AC	-0.777645	0.326651	0	0	-1.23308	0.218	0	B01AC Platelet aggregation inhibitors excl. heparin	0.763
Depression	D	p6m	C07AB	-1.95795	0.608215	0	-1	-1.78709	0.0739	0	C07AB Beta blocking AGE>70nts, selective	0.405
Depression	D	p6m	C08CA	-0.357206	-0.0795561	0	0	-0.345905	0.729	0	C08CA Dihydropyridine derivatives [DG:DG01928]	1
Depression	D	p6m	C09AA	-0.722268	-0.301036	0	0	-0.470066	0.638	0	C09AA ACE inhibitors, plain [DG:DG01501]	1
Depression	D	p6m	C09CA	-0.592166	0.0664299	0	0	-0.632723	0.527	0	C09CA Angiotensin II receptor blockers, plain [DG:DG01495]	1
Depression	D	p6m	C10AA	-1.36507	0.0140534	1	0	-1.90776	0.0564	0	C10AA HMG CoA reductase inhibitors [DG:DG01660]	0.405
Depression	D	p6m	G03CA	-14.4397	-0.0322325	0	0	-0.0109306	0.991	0	G03CA Natural and semisynthetic estrogens, plain	1
Depression	D	p6m	G04CB	-14.5384	-0.493668	0	0	-0.0115645	0.991	0	G04CB Testosterone-5-alpha reductase inhibitors	1
Depression	D	p6m	H03AA	-0.132564	0.491385	0	0	-0.659509	0.51	0	H03AA Thyroid hormones	1
Depression	D	p6m	R03BA	-15.0019	-0.102552	0	0	-0.00875293	0.993	0	R03BA Glucocorticoids	1
Depression	E	p6m	A02BC	0.322856	0.388808	-1	-1	-0.506165	0.613	0	A02BC Proton pump inhibitors [DG:DG01646]	0.839
Depression	E	p6m	A03AA	0.140079	0.278877	0	0	-0.260133	0.795	0	A03AA Synthetic anticholinergics, esters with tertiary amino group	0.861
Depression	E	p6m	A10AE	0.21965	-0.321589	0	0	0.838399	0.402	0	A10AE Insulins and analogues for injection, long-acting	0.839
Depression	E	p6m	A10BA	0.236692	0.11274	0	0	0.441976	0.659	0	A10BA Biguanides [DG:DG01684]	0.839
Depression	E	p6m	B01AC	-0.0371482	0.286074	0	-1	-1.49531	0.135	0	B01AC Platelet aggregation inhibitors excl. heparin	0.767
Depression	E	p6m	C07AB	-0.15981	0.1522	0	-1	-1.36655	0.172	0	C07AB Beta blocking AGE>70nts, selective	0.767
Depression	E	p6m	C08CA	0.284397	0.0952265	0	0	1.09392	0.274	0	C08CA Dihydropyridine derivatives [DG:DG01928]	0.767
Depression	E	p6m	C09AA	0.231773	-0.0458311	0	0	1.55174	0.121	0	C09AA ACE inhibitors, plain [DG:DG01501]	0.767
Depression	E	p6m	C09CA	0.0179534	0.0700025	0	0	-0.218975	0.827	0	C09CA Angiotensin II receptor blockers, plain [DG:DG01495]	0.861
Depression	E	p6m	C10AA	0.0648319	0.140331	0	-1	-0.533045	0.594	0	C10AA HMG CoA reductase inhibitors [DG:DG01660]	0.839
Depression	E	p6m	G03CA	0.381559	0.179199	0	0	0.745221	0.456	0	G03CA Natural and semisynthetic estrogens, plain	0.839
Depression	E	p6m	G04CB	-0.76811	-0.00548927	0	0	-1.11566	0.265	0	G04CB Testosterone-5-alpha reductase inhibitors	0.767
Depression	E	p6m	H03AA	-0.0667518	0.0304322	0	0	-0.456681	0.648	0	H03AA Thyroid hormones	0.839
Depression	E	p6m	R03BA	0.564417	0.505061	0	-1	0.175038	0.861	0	R03BA Glucocorticoids	0.861
Depression	F	p6m	A02BC	-0.342902	-0.313615	1	1	-0.215625	0.829	0	A02BC Proton pump inhibitors [DG:DG01646]	0.976
Depression	F	p6m	A03AA	-0.438161	-0.401072	0	0	-0.0666829	0.947	0	A03AA Synthetic anticholinergics, esters with tertiary amino group	0.976
Depression	F	p6m	A10AE	-0.0623995	-0.751974	0	1	1.01441	0.31	0	A10AE Insulins and analogues for injection, long-acting	0.834
Depression	F	p6m	A10BA	0.0490224	0.040111	0	0	0.0298191	0.976	0	A10BA Biguanides [DG:DG01684]	0.976
Depression	F	p6m	B01AC	-0.300108	-0.105406	0	0	-0.86875	0.385	0	B01AC Platelet aggregation inhibitors excl. heparin	0.834
Depression	F	p6m	C07AB	-0.366988	-0.228357	0	1	-0.582863	0.56	0	C07AB Beta blocking AGE>70nts, selective	0.976
Depression	F	p6m	C08CA	0.137598	-0.110014	0	0	1.34873	0.177	0	C08CA Dihydropyridine derivatives [DG:DG01928]	0.766
Depression	F	p6m	C09AA	0.102054	-0.184892	0	1	1.51609	0.129	0	C09AA ACE inhibitors, plain [DG:DG01501]	0.766
Depression	F	p6m	C09CA	-0.123757	-0.182015	0	1	0.233381	0.815	0	C09CA Angiotensin II receptor blockers, plain [DG:DG01495]	0.976
Depression	F	p6m	C10AA	-0.0844764	-0.0557706	0	0	-0.192361	0.847	0	C10AA HMG CoA reductase inhibitors [DG:DG01660]	0.976
Depression	F	p6m	G03CA	-0.129062	-0.505981	0	1	1.30547	0.192	0	G03CA Natural and semisynthetic estrogens, plain	0.766
Depression	F	p6m	G04CB	-1.2568	-0.39854	0	1	-1.22809	0.219	0	G04CB Testosterone-5-alpha reductase inhibitors	0.766
Depression	F	p6m	H03AA	-0.294257	-0.207635	0	1	-0.385317	0.7	0	H03AA Thyroid hormones	0.976
Depression	F	p6m	R03BA	0.151192	-0.144242	0	0	0.811385	0.417	0	R03BA Glucocorticoids	0.834
Depression	G	p6m	A02BC	-0.218895	-0.37194	0	1	0.731956	0.464	0	A02BC Proton pump inhibitors [DG:DG01646]	0.928
Depression	G	p6m	A03AA	-0.477225	-0.188471	0	0	-0.35069	0.726	0	A03AA Synthetic anticholinergics, esters with tertiary amino group	0.94
Depression	G	p6m	A10AE	0.635614	-0.464147	0	0	1.47402	0.14	0	A10AE Insulins and analogues for injection, long-acting	0.668
Depression	G	p6m	A10BA	-0.0181756	-0.174097	0	0	0.375406	0.707	0	A10BA Biguanides [DG:DG01684]	0.94
Depression	G	p6m	B01AC	-0.780984	-0.159902	1	0	-1.75727	0.0789	0	B01AC Platelet aggregation inhibitors excl. heparin	0.668
Depression	G	p6m	C07AB	-0.382554	-0.255785	0	1	-0.371786	0.71	0	C07AB Beta blocking AGE>70nts, selective	0.94
Depression	G	p6m	C08CA	0.0115951	-0.257878	0	1	0.958441	0.338	0	C08CA Dihydropyridine derivatives [DG:DG01928]	0.917
Depression	G	p6m	C09AA	-0.0144972	-0.439885	0	1	1.45896	0.145	0	C09AA ACE inhibitors, plain [DG:DG01501]	0.668
Depression	G	p6m	C09CA	-0.290444	-0.341826	0	1	0.132953	0.894	0	C09CA Angiotensin II receptor blockers, plain [DG:DG01495]	0.94
Depression	G	p6m	C10AA	-0.404383	-0.422017	0	1	0.0756056	0.94	0	C10AA HMG CoA reductase inhibitors [DG:DG01660]	0.94
Depression	G	p6m	G03CA	-0.0124948	-0.420939	0	1	0.853483	0.393	0	G03CA Natural and semisynthetic estrogens, plain	0.917
Depression	G	p6m	G04CB	-2.45895	-0.393738	0	0	-1.30703	0.191	0	G04CB Testosterone-5-alpha reductase inhibitors	0.668
Depression	G	p6m	H03AA	-0.31786	-0.427466	0	1	0.308305	0.758	0	H03AA Thyroid hormones	0.94
Depression	G	p6m	R03BA	-0.280372	-0.41281	0	0	0.20077	0.841	0	R03BA Glucocorticoids	0.94
Depression	H	p6m	A02BC	-0.972527	0.0634001	0	0	-1.6162	0.106	0	A02BC Proton pump inhibitors [DG:DG01646]	0.495
Depression	H	p6m	A03AA	-14.659	-14.1277	0	0	-0.000356431	1	0	A03AA Synthetic anticholinergics, esters with tertiary amino group	1
Depression	H	p6m	A10AE	1.09647	0.507325	0	0	0.346477	0.729	0	A10AE Insulins and analogues for injection, long-acting	1
Depression	H	p6m	A10BA	0.0609827	-0.396322	0	0	0.410365	0.682	0	A10BA Biguanides [DG:DG01684]	1
Depression	H	p6m	B01AC	-0.912393	0.117591	0	0	-1.14901	0.251	0	B01AC Platelet aggregation inhibitors excl. heparin	0.879
Depression	H	p6m	C07AB	-2.04427	0.328594	0	0	-1.63181	0.103	0	C07AB Beta blocking AGE>70nts, selective	0.495
Depression	H	p6m	C08CA	-0.376581	-0.165348	0	0	-0.261923	0.793	0	C08CA Dihydropyridine derivatives [DG:DG01928]	1
Depression	H	p6m	C09AA	-0.68372	-0.396538	0	0	-0.319817	0.749	0	C09AA ACE inhibitors, plain [DG:DG01501]	1
Depression	H	p6m	C09CA	-0.634866	-0.110352	0	0	-0.497796	0.619	0	C09CA Angiotensin II receptor blockers, plain [DG:DG01495]	1
Depression	H	p6m	C10AA	-1.41542	-0.126857	1	0	-1.75872	0.0786	0	C10AA HMG CoA reductase inhibitors [DG:DG01660]	0.495
Depression	H	p6m	G03CA	-15.1316	-0.597739	0	0	-0.0103732	0.992	0	G03CA Natural and semisynthetic estrogens, plain	1
Depression	H	p6m	G04CB	-16.0279	-0.79219	0	0	-0.00769489	0.994	0	G04CB Testosterone-5-alpha reductase inhibitors	1
Depression	H	p6m	H03AA	-0.316229	0.312485	0	0	-0.653056	0.514	0	H03AA Thyroid hormones	1
Depression	H	p6m	R03BA	-15.3452	-0.607152	0	0	-0.00814719	0.993	0	R03BA Glucocorticoids	1
DM	A	p6m	A02BC	-0.278748	-0.0720166	0	0	-0.663163	0.507	0	A02BC Proton pump inhibitors [DG:DG01646]	0.955
DM	A	p6m	A03AA	-0.674695	0.443909	0	0	-0.871023	0.384	0	A03AA Synthetic anticholinergics, esters with tertiary amino group	0.955
DM	A	p6m	A10AE	0.404521	11.8445	0	0	-0.060616	0.952	0	A10AE Insulins and analogues for injection, long-acting	0.988
DM	A	p6m	A10BA	-0.455094	-0.202066	0	0	-0.654323	0.513	0	A10BA Biguanides [DG:DG01684]	0.955
DM	A	p6m	B01AC	-0.236654	-0.198336	0	0	-0.102264	0.919	0	B01AC Platelet aggregation inhibitors excl. heparin	0.988
DM	A	p6m	C07AB	-0.159953	0.00944829	0	0	-0.419268	0.675	0	C07AB Beta blocking AGE>70nts, selective	0.955
DM	A	p6m	C08CA	-0.0377322	-0.264236	0	1	0.623451	0.533	0	C08CA Dihydropyridine derivatives [DG:DG01928]	0.955
DM	A	p6m	C09AA	-0.408824	-0.382886	0	1	-0.0774679	0.938	0	C09AA ACE inhibitors, plain [DG:DG01501]	0.988
DM	A	p6m	C09CA	-0.516853	-0.242898	0	0	-0.603873	0.546	0	C09CA Angiotensin II receptor blockers, plain [DG:DG01495]	0.955
DM	A	p6m	C10AA	-0.950182	-0.512081	1	1	-1.42924	0.153	0	C10AA HMG CoA reductase inhibitors [DG:DG01660]	0.955
DM	A	p6m	G03CA	0.957617	0.0684614	0	0	0.650617	0.515	0	G03CA Natural and semisynthetic estrogens, plain	0.955
DM	A	p6m	G04CB	-0.222728	-0.209615	0	0	-0.0147096	0.988	0	G04CB Testosterone-5-alpha reductase inhibitors	0.988
DM	A	p6m	H03AA	-0.633893	-0.256956	0	0	-0.675989	0.499	0	H03AA Thyroid hormones	0.955
DM	A	p6m	R03BA	-1.26929	-0.723532	0	0	-0.409774	0.682	0	R03BA Glucocorticoids	0.955
DM	B	p6m	A02BC	0.173569	0.290489	0	0	-0.201798	0.84	0	A02BC Proton pump inhibitors [DG:DG01646]	1
DM	B	p6m	A03AA	-11.8955	-14.2833	0	0	0.00132941	0.999	0	A03AA Synthetic anticholinergics, esters with tertiary amino group	1
DM	B	p6m	A10AE	1.17835	18.576	0	0	-0.00458962	0.996	0	A10AE Insulins and analogues for injection, long-acting	1
DM	B	p6m	A10BA	-0.0042946	-0.366934	0	0	0.377209	0.706	0	A10BA Biguanides [DG:DG01684]	1
DM	B	p6m	B01AC	0.149935	-0.010035	0	0	0.248172	0.804	0	B01AC Platelet aggregation inhibitors excl. heparin	1
DM	B	p6m	C07AB	-0.218168	0.734728	0	-1	-1.3492	0.177	0	C07AB Beta blocking AGE>70nts, selective	1
DM	B	p6m	C08CA	-0.33177	0.0258775	0	0	-0.500563	0.617	0	C08CA Dihydropyridine derivatives [DG:DG01928]	1
DM	B	p6m	C09AA	0.160021	-0.161392	0	0	0.500713	0.617	0	C09AA ACE inhibitors, plain [DG:DG01501]	1
DM	B	p6m	C09CA	-0.784965	0.195969	0	0	-1.04559	0.296	0	C09CA Angiotensin II receptor blockers, plain [DG:DG01495]	1
DM	B	p6m	C10AA	-0.341185	-0.000911853	0	0	-0.590225	0.555	0	C10AA HMG CoA reductase inhibitors [DG:DG01660]	1
DM	B	p6m	G03CA	-14.4966	-0.30541	0	0	-0.0115745	0.991	0	G03CA Natural and semisynthetic estrogens, plain	1
DM	B	p6m	G04CB	-2.86268	-0.389301	0	0	-0.956053	0.339	0	G04CB Testosterone-5-alpha reductase inhibitors	1
DM	B	p6m	H03AA	0.612497	0.528265	0	0	0.0863174	0.931	0	H03AA Thyroid hormones	1
DM	B	p6m	R03BA	-15.4821	-14.4859	0	0	-0.000472524	1	0	R03BA Glucocorticoids	1
DM	C	p6m	A02BC	0.0636394	0.31107	0	-1	-1.19368	0.233	0	A02BC Proton pump inhibitors [DG:DG01646]	0.879
DM	C	p6m	A03AA	-0.11987	0.402953	0	0	-0.52121	0.602	0	A03AA Synthetic anticholinergics, esters with tertiary amino group	0.984
DM	C	p6m	A10AE	0.0776535	1.3306	0	0	-1.25637	0.209	0	A10AE Insulins and analogues for injection, long-acting	0.879
DM	C	p6m	A10BA	-0.142063	0.0167357	0	0	-0.565901	0.571	0	A10BA Biguanides [DG:DG01684]	0.984
DM	C	p6m	B01AC	0.0419823	0.0956089	0	0	-0.217846	0.828	0	B01AC Platelet aggregation inhibitors excl. heparin	0.984
DM	C	p6m	C07AB	-0.0673857	0.0569798	0	0	-0.473612	0.636	0	C07AB Beta blocking AGE>70nts, selective	0.984
DM	C	p6m	C08CA	-0.0622687	-0.0574008	0	0	-0.0205847	0.984	0	C08CA Dihydropyridine derivatives [DG:DG01928]	0.984
DM	C	p6m	C09AA	-0.218871	-0.317757	0	1	0.425328	0.671	0	C09AA ACE inhibitors, plain [DG:DG01501]	0.984
DM	C	p6m	C09CA	-0.403167	-0.0553825	0	0	-1.14902	0.251	0	C09CA Angiotensin II receptor blockers, plain [DG:DG01495]	0.879
DM	C	p6m	C10AA	-0.488241	-0.200789	1	1	-1.47242	0.141	0	C10AA HMG CoA reductase inhibitors [DG:DG01660]	0.879
DM	C	p6m	G03CA	0.386515	0.274507	0	0	0.140532	0.888	0	G03CA Natural and semisynthetic estrogens, plain	0.984
DM	C	p6m	G04CB	-0.0947322	-0.186682	0	0	0.167794	0.867	0	G04CB Testosterone-5-alpha reductase inhibitors	0.984
DM	C	p6m	H03AA	-0.374308	-0.169967	0	0	-0.507555	0.612	0	H03AA Thyroid hormones	0.984
DM	C	p6m	R03BA	0.172139	0.184655	0	0	-0.0210668	0.983	0	R03BA Glucocorticoids	0.984
DM	D	p6m	A02BC	0.287156	0.470865	0	-1	-0.363281	0.716	0	A02BC Proton pump inhibitors [DG:DG01646]	0.999
DM	D	p6m	A03AA	-12.8733	-13.6447	0	0	0.000657044	0.999	0	A03AA Synthetic anticholinergics, esters with tertiary amino group	0.999
DM	D	p6m	A10AE	0.792197	3.93061	0	-1	-2.59958	0.00933	1	A10AE Insulins and analogues for injection, long-acting	0.131
DM	D	p6m	A10BA	-0.257485	-0.261528	0	0	0.0046408	0.996	0	A10BA Biguanides [DG:DG01684]	0.999
DM	D	p6m	B01AC	0.38014	0.147631	0	0	0.418332	0.676	0	B01AC Platelet aggregation inhibitors excl. heparin	0.999
DM	D	p6m	C07AB	-0.0248923	0.526524	0	-1	-0.947454	0.343	0	C07AB Beta blocking AGE>70nts, selective	0.999
DM	D	p6m	C08CA	-0.392122	-0.0205134	0	0	-0.605232	0.545	0	C08CA Dihydropyridine derivatives [DG:DG01928]	0.999
DM	D	p6m	C09AA	-0.0267802	-0.488779	0	0	0.81432	0.415	0	C09AA ACE inhibitors, plain [DG:DG01501]	0.999
DM	D	p6m	C09CA	-0.773059	0.222595	0	0	-1.23053	0.218	0	C09CA Angiotensin II receptor blockers, plain [DG:DG01495]	0.999
DM	D	p6m	C10AA	-0.449589	-0.056268	0	0	-0.805471	0.421	0	C10AA HMG CoA reductase inhibitors [DG:DG01660]	0.999
DM	D	p6m	G03CA	-13.5911	-0.163106	0	0	-0.00969656	0.992	0	G03CA Natural and semisynthetic estrogens, plain	0.999
DM	D	p6m	G04CB	-2.07057	-0.431249	0	0	-0.664592	0.506	0	G04CB Testosterone-5-alpha reductase inhibitors	0.999
DM	D	p6m	H03AA	0.425309	0.382834	0	0	0.0545478	0.956	0	H03AA Thyroid hormones	0.999
DM	D	p6m	R03BA	-13.9036	-12.9136	0	0	-0.000665077	0.999	0	R03BA Glucocorticoids	0.999
DM	E	p6m	A02BC	0.202031	0.399061	0	-1	-1.39398	0.163	0	A02BC Proton pump inhibitors [DG:DG01646]	0.761
DM	E	p6m	A03AA	0.699876	0.174733	0	0	1.00927	0.313	0	A03AA Synthetic anticholinergics, esters with tertiary amino group	0.977
DM	E	p6m	A10AE	-0.217613	0.0618251	0	0	-0.286572	0.774	0	A10AE Insulins and analogues for injection, long-acting	0.984
DM	E	p6m	A10BA	0.108726	0.112216	0	0	-0.0199748	0.984	0	A10BA Biguanides [DG:DG01684]	0.984
DM	E	p6m	B01AC	0.1839	0.259889	0	-1	-0.443591	0.657	0	B01AC Platelet aggregation inhibitors excl. heparin	0.984
DM	E	p6m	C07AB	0.022251	0.133145	0	0	-0.593128	0.553	0	C07AB Beta blocking AGE>70nts, selective	0.984
DM	E	p6m	C08CA	-0.0204787	0.132887	0	-1	-0.93634	0.349	0	C08CA Dihydropyridine derivatives [DG:DG01928]	0.977
DM	E	p6m	C09AA	0.00228892	-0.0239656	0	0	0.173267	0.862	0	C09AA ACE inhibitors, plain [DG:DG01501]	0.984
DM	E	p6m	C09CA	-0.202289	0.116783	0	0	-1.60958	0.107	0	C09CA Angiotensin II receptor blockers, plain [DG:DG01495]	0.761
DM	E	p6m	C10AA	-0.0372241	0.155547	0	-1	-1.44755	0.148	0	C10AA HMG CoA reductase inhibitors [DG:DG01660]	0.761
DM	E	p6m	G03CA	-0.0811549	0.206757	0	-1	-0.462503	0.644	0	G03CA Natural and semisynthetic estrogens, plain	0.984
DM	E	p6m	G04CB	-0.0828277	-0.0742393	0	0	-0.0209251	0.983	0	G04CB Testosterone-5-alpha reductase inhibitors	0.984
DM	E	p6m	H03AA	-0.0294115	0.0263463	0	0	-0.228225	0.819	0	H03AA Thyroid hormones	0.984
DM	E	p6m	R03BA	0.642844	0.496937	-1	-1	0.430541	0.667	0	R03BA Glucocorticoids	0.984
DM	F	p6m	A02BC	-0.308769	-0.319068	1	1	0.0689298	0.945	0	A02BC Proton pump inhibitors [DG:DG01646]	0.949
DM	F	p6m	A03AA	0.320733	-0.509828	0	1	1.45838	0.145	0	A03AA Synthetic anticholinergics, esters with tertiary amino group	0.949
DM	F	p6m	A10AE	-0.656268	-0.952922	1	0	0.291715	0.771	0	A10AE Insulins and analogues for injection, long-acting	0.949
DM	F	p6m	A10BA	0.042089	0.029977	0	0	0.0636543	0.949	0	A10BA Biguanides [DG:DG01684]	0.949
DM	F	p6m	B01AC	-0.0942475	-0.137595	0	0	0.239787	0.81	0	B01AC Platelet aggregation inhibitors excl. heparin	0.949
DM	F	p6m	C07AB	-0.231193	-0.25033	0	1	0.0971565	0.923	0	C07AB Beta blocking AGE>70nts, selective	0.949
DM	F	p6m	C08CA	-0.142254	-0.0791809	0	0	-0.36219	0.717	0	C08CA Dihydropyridine derivatives [DG:DG01928]	0.949
DM	F	p6m	C09AA	0.041441	-0.1944	0	1	1.44778	0.148	0	C09AA ACE inhibitors, plain [DG:DG01501]	0.949
DM	F	p6m	C09CA	-0.374302	-0.135693	0	0	-1.1331	0.257	0	C09CA Angiotensin II receptor blockers, plain [DG:DG01495]	0.949
DM	F	p6m	C10AA	-0.169079	-0.0447907	0	0	-0.859879	0.39	0	C10AA HMG CoA reductase inhibitors [DG:DG01660]	0.949
DM	F	p6m	G03CA	-0.698564	-0.458615	0	1	-0.372864	0.709	0	G03CA Natural and semisynthetic estrogens, plain	0.949
DM	F	p6m	G04CB	-0.423174	-0.478459	0	1	0.128991	0.897	0	G04CB Testosterone-5-alpha reductase inhibitors	0.949
DM	F	p6m	H03AA	-0.241996	-0.21833	0	1	-0.0913943	0.927	0	H03AA Thyroid hormones	0.949
DM	F	p6m	R03BA	0.0877094	-0.130383	0	0	0.596225	0.551	0	R03BA Glucocorticoids	0.949
DM	G	p6m	A02BC	-0.42554	-0.342087	1	1	-0.393555	0.694	0	A02BC Proton pump inhibitors [DG:DG01646]	0.917
DM	G	p6m	A03AA	-0.441681	-0.218994	0	0	-0.216605	0.829	0	A03AA Synthetic anticholinergics, esters with tertiary amino group	0.917
DM	G	p6m	A10AE	-0.365129	0.261861	0	0	-0.604861	0.545	0	A10AE Insulins and analogues for injection, long-acting	0.917
DM	G	p6m	A10BA	-0.180345	-0.0660922	0	0	-0.393025	0.694	0	A10BA Biguanides [DG:DG01684]	0.917
DM	G	p6m	B01AC	-0.208311	-0.234629	0	0	0.103991	0.917	0	B01AC Platelet aggregation inhibitors excl. heparin	0.917
DM	G	p6m	C07AB	-0.300703	-0.265494	0	1	-0.129905	0.897	0	C07AB Beta blocking AGE>70nts, selective	0.917
DM	G	p6m	C08CA	-0.176442	-0.241904	0	1	0.268752	0.788	0	C08CA Dihydropyridine derivatives [DG:DG01928]	0.917
DM	G	p6m	C09AA	-0.194752	-0.447794	0	1	1.05271	0.292	0	C09AA ACE inhibitors, plain [DG:DG01501]	0.917
DM	G	p6m	C09CA	-0.560954	-0.26694	1	0	-0.943975	0.345	0	C09CA Angiotensin II receptor blockers, plain [DG:DG01495]	0.917
DM	G	p6m	C10AA	-0.639402	-0.384177	1	1	-1.24726	0.212	0	C10AA HMG CoA reductase inhibitors [DG:DG01660]	0.917
DM	G	p6m	G03CA	-0.212236	-0.373202	0	0	0.197673	0.843	0	G03CA Natural and semisynthetic estrogens, plain	0.917
DM	G	p6m	G04CB	-0.387711	-0.548316	0	1	0.285441	0.775	0	G04CB Testosterone-5-alpha reductase inhibitors	0.917
DM	G	p6m	H03AA	-0.553959	-0.393353	0	1	-0.388792	0.697	0	H03AA Thyroid hormones	0.917
DM	G	p6m	R03BA	-0.252237	-0.397745	0	0	0.238306	0.812	0	R03BA Glucocorticoids	0.917
DM	H	p6m	A02BC	-0.164215	-0.0301566	0	0	-0.264851	0.791	0	A02BC Proton pump inhibitors [DG:DG01646]	0.999
DM	H	p6m	A03AA	-13.2888	-14.239	0	0	0.000750408	0.999	0	A03AA Synthetic anticholinergics, esters with tertiary amino group	0.999
DM	H	p6m	A10AE	0.483948	2.46682	0	-1	-1.46717	0.142	0	A10AE Insulins and analogues for injection, long-acting	0.999
DM	H	p6m	A10BA	-0.294981	-0.322212	0	0	0.0310218	0.975	0	A10BA Biguanides [DG:DG01684]	0.999
DM	H	p6m	B01AC	0.173008	-0.0359452	0	0	0.369875	0.711	0	B01AC Platelet aggregation inhibitors excl. heparin	0.999
DM	H	p6m	C07AB	-0.247847	0.287323	0	0	-0.895841	0.37	0	C07AB Beta blocking AGE>70nts, selective	0.999
DM	H	p6m	C08CA	-0.499092	-0.14738	0	0	-0.567067	0.571	0	C08CA Dihydropyridine derivatives [DG:DG01928]	0.999
DM	H	p6m	C09AA	-0.00708415	-0.561271	0	0	0.963592	0.335	0	C09AA ACE inhibitors, plain [DG:DG01501]	0.999
DM	H	p6m	C09CA	-0.895276	-0.0136261	0	0	-1.07945	0.28	0	C09CA Angiotensin II receptor blockers, plain [DG:DG01495]	0.999
DM	H	p6m	C10AA	-0.654764	-0.184363	0	0	-0.938939	0.348	0	C10AA HMG CoA reductase inhibitors [DG:DG01660]	0.999
DM	H	p6m	G03CA	-14.189	-0.734174	0	0	-0.00964842	0.992	0	G03CA Natural and semisynthetic estrogens, plain	0.999
DM	H	p6m	G04CB	-2.4781	-0.731782	0	0	-0.705215	0.481	0	G04CB Testosterone-5-alpha reductase inhibitors	0.999
DM	H	p6m	H03AA	0.158172	0.248119	0	0	-0.113696	0.909	0	H03AA Thyroid hormones	0.999
DM	H	p6m	R03BA	-14.4255	-12.4379	0	0	-0.00154424	0.999	0	R03BA Glucocorticoids	0.999
Dx_cancer	A	p6m	A02BC	0.171915	-0.115954	0	0	0.780111	0.435	0	A02BC Proton pump inhibitors [DG:DG01646]	0.988
Dx_cancer	A	p6m	A03AA	-0.0621592	0.230215	0	0	-0.226688	0.821	0	A03AA Synthetic anticholinergics, esters with tertiary amino group	0.988
Dx_cancer	A	p6m	A10AE	-16.8257	0.640097	0	0	-0.00529596	0.996	0	A10AE Insulins and analogues for injection, long-acting	0.996
Dx_cancer	A	p6m	A10BA	0.449636	-0.424133	0	1	1.05514	0.291	0	A10BA Biguanides [DG:DG01684]	0.988
Dx_cancer	A	p6m	B01AC	-0.337704	-0.225182	0	0	-0.178483	0.858	0	B01AC Platelet aggregation inhibitors excl. heparin	0.988
Dx_cancer	A	p6m	C07AB	0.0489684	-0.0197935	0	0	0.103819	0.917	0	C07AB Beta blocking AGE>70nts, selective	0.988
Dx_cancer	A	p6m	C08CA	-0.389678	-0.22967	0	0	-0.33089	0.741	0	C08CA Dihydropyridine derivatives [DG:DG01928]	0.988
Dx_cancer	A	p6m	C09AA	-0.559315	-0.38322	0	1	-0.302608	0.762	0	C09AA ACE inhibitors, plain [DG:DG01501]	0.988
Dx_cancer	A	p6m	C09CA	0.18814	-0.299639	0	0	0.744216	0.457	0	C09CA Angiotensin II receptor blockers, plain [DG:DG01495]	0.988
Dx_cancer	A	p6m	C10AA	-0.509245	-0.579526	0	1	0.167836	0.867	0	C10AA HMG CoA reductase inhibitors [DG:DG01660]	0.988
Dx_cancer	A	p6m	G03CA	-0.286643	0.0880178	0	0	-0.265221	0.791	0	G03CA Natural and semisynthetic estrogens, plain	0.988
Dx_cancer	A	p6m	G04CB	-0.725221	-0.194418	0	0	-0.345072	0.73	0	G04CB Testosterone-5-alpha reductase inhibitors	0.988
Dx_cancer	A	p6m	H03AA	0.486818	-0.374347	0	1	1.41572	0.157	0	H03AA Thyroid hormones	0.988
Dx_cancer	A	p6m	R03BA	-0.379958	0.70839	0	0	-0.625481	0.532	0	R03BA Glucocorticoids	0.988
Dx_cancer	B	p6m	A02BC	0.502692	0.238536	0	0	0.352296	0.725	0	A02BC Proton pump inhibitors [DG:DG01646]	1
Dx_cancer	B	p6m	A03AA	-15.6805	-13.9704	0	0	-0.000553881	1	0	A03AA Synthetic anticholinergics, esters with tertiary amino group	1
Dx_cancer	B	p6m	A10AE	-11.1216	1.09788	0	0	-0.00136306	0.999	0	A10AE Insulins and analogues for injection, long-acting	1
Dx_cancer	B	p6m	A10BA	-1.97723	-0.201755	0	0	-0.825383	0.409	0	A10BA Biguanides [DG:DG01684]	1
Dx_cancer	B	p6m	B01AC	-1.95688	0.145496	0	0	-1.38985	0.165	0	B01AC Platelet aggregation inhibitors excl. heparin	1
Dx_cancer	B	p6m	C07AB	-2.0122	0.674945	0	-1	-1.16234	0.245	0	C07AB Beta blocking AGE>70nts, selective	1
Dx_cancer	B	p6m	C08CA	-0.627682	0.0427028	0	0	-0.664021	0.507	0	C08CA Dihydropyridine derivatives [DG:DG01928]	1
Dx_cancer	B	p6m	C09AA	-0.419179	-0.0832603	0	0	-0.296839	0.767	0	C09AA ACE inhibitors, plain [DG:DG01501]	1
Dx_cancer	B	p6m	C09CA	0.813592	0.0233627	0	0	0.676	0.499	0	C09CA Angiotensin II receptor blockers, plain [DG:DG01495]	1
Dx_cancer	B	p6m	C10AA	-0.343622	-0.0386452	0	0	-0.387755	0.698	0	C10AA HMG CoA reductase inhibitors [DG:DG01660]	1
Dx_cancer	B	p6m	G03CA	-14.0453	-0.496024	0	0	-0.00450244	0.996	0	G03CA Natural and semisynthetic estrogens, plain	1
Dx_cancer	B	p6m	G04CB	-14.8212	-0.667414	0	0	-0.00446305	0.996	0	G04CB Testosterone-5-alpha reductase inhibitors	1
Dx_cancer	B	p6m	H03AA	-0.125668	0.624808	0	0	-0.469296	0.639	0	H03AA Thyroid hormones	1
Dx_cancer	B	p6m	R03BA	-15.4332	-0.0456417	0	0	-0.00492896	0.996	0	R03BA Glucocorticoids	1
Dx_cancer	C	p6m	A02BC	0.669705	0.241497	-1	-1	1.66398	0.0961	0	A02BC Proton pump inhibitors [DG:DG01646]	0.673
Dx_cancer	C	p6m	A03AA	0.986602	0.211547	0	0	0.939435	0.348	0	A03AA Synthetic anticholinergics, esters with tertiary amino group	0.942
Dx_cancer	C	p6m	A10AE	-13.0962	0.211156	0	0	-0.0250828	0.98	0	A10AE Insulins and analogues for injection, long-acting	0.99
Dx_cancer	C	p6m	A10BA	0.78221	-0.150661	0	0	1.85703	0.0633	0	A10BA Biguanides [DG:DG01684]	0.673
Dx_cancer	C	p6m	B01AC	0.190795	0.0691597	0	0	0.328538	0.743	0	B01AC Platelet aggregation inhibitors excl. heparin	0.99
Dx_cancer	C	p6m	C07AB	-0.262471	0.0548462	0	0	-0.749818	0.453	0	C07AB Beta blocking AGE>70nts, selective	0.942
Dx_cancer	C	p6m	C08CA	0.187335	-0.0792476	0	0	0.828168	0.408	0	C08CA Dihydropyridine derivatives [DG:DG01928]	0.942
Dx_cancer	C	p6m	C09AA	-0.435868	-0.280085	0	1	-0.390561	0.696	0	C09AA ACE inhibitors, plain [DG:DG01501]	0.99
Dx_cancer	C	p6m	C09CA	-0.0831781	-0.139973	0	0	0.12862	0.898	0	C09CA Angiotensin II receptor blockers, plain [DG:DG01495]	0.99
Dx_cancer	C	p6m	C10AA	-0.0934932	-0.258609	0	1	0.61586	0.538	0	C10AA HMG CoA reductase inhibitors [DG:DG01660]	0.942
Dx_cancer	C	p6m	G03CA	-0.357524	0.312142	0	0	-0.637914	0.524	0	G03CA Natural and semisynthetic estrogens, plain	0.942
Dx_cancer	C	p6m	G04CB	-0.152439	-0.162463	0	0	0.0122643	0.99	0	G04CB Testosterone-5-alpha reductase inhibitors	0.99
Dx_cancer	C	p6m	H03AA	0.237062	-0.250936	0	0	1.25432	0.21	0	H03AA Thyroid hormones	0.942
Dx_cancer	C	p6m	R03BA	-0.0291689	0.203364	0	0	-0.272831	0.785	0	R03BA Glucocorticoids	0.99
Dx_cancer	D	p6m	A02BC	1.1744	0.353747	-1	0	1.32188	0.186	0	A02BC Proton pump inhibitors [DG:DG01646]	1
Dx_cancer	D	p6m	A03AA	-13.438	-13.6337	0	0	0.000101661	1	0	A03AA Synthetic anticholinergics, esters with tertiary amino group	1
Dx_cancer	D	p6m	A10AE	-13.3936	1.05593	0	0	-0.00692251	0.994	0	A10AE Insulins and analogues for injection, long-acting	1
Dx_cancer	D	p6m	A10BA	0.20693	-0.252141	0	0	0.252395	0.801	0	A10BA Biguanides [DG:DG01684]	1
Dx_cancer	D	p6m	B01AC	-0.788789	0.2962	0	0	-0.925432	0.355	0	B01AC Platelet aggregation inhibitors excl. heparin	1
Dx_cancer	D	p6m	C07AB	-2.15565	0.517334	0	-1	-1.25036	0.211	0	C07AB Beta blocking AGE>70nts, selective	1
Dx_cancer	D	p6m	C08CA	-0.343801	-0.0888472	0	0	-0.305351	0.76	0	C08CA Dihydropyridine derivatives [DG:DG01928]	1
Dx_cancer	D	p6m	C09AA	-0.601819	-0.31339	0	0	-0.304006	0.761	0	C09AA ACE inhibitors, plain [DG:DG01501]	1
Dx_cancer	D	p6m	C09CA	0.452724	-0.0427955	0	0	0.546923	0.584	0	C09CA Angiotensin II receptor blockers, plain [DG:DG01495]	1
Dx_cancer	D	p6m	C10AA	-0.00840438	-0.13759	0	0	0.200771	0.841	0	C10AA HMG CoA reductase inhibitors [DG:DG01660]	1
Dx_cancer	D	p6m	G03CA	-13.3917	-0.239583	0	0	-0.00734662	0.994	0	G03CA Natural and semisynthetic estrogens, plain	1
Dx_cancer	D	p6m	G04CB	-16.2052	-0.469244	0	0	-0.00796397	0.994	0	G04CB Testosterone-5-alpha reductase inhibitors	1
Dx_cancer	D	p6m	H03AA	-0.328672	0.414163	0	0	-0.546873	0.584	0	H03AA Thyroid hormones	1
Dx_cancer	D	p6m	R03BA	-14.8888	-0.194998	0	0	-0.00781519	0.994	0	R03BA Glucocorticoids	1
Dx_cancer	E	p6m	A02BC	0.634493	0.360011	-1	-1	1.68523	0.0919	0	A02BC Proton pump inhibitors [DG:DG01646]	0.54
Dx_cancer	E	p6m	A03AA	0.919645	0.15743	0	0	1.3441	0.179	0	A03AA Synthetic anticholinergics, esters with tertiary amino group	0.54
Dx_cancer	E	p6m	A10AE	-0.964666	-0.209108	0	0	-0.473782	0.636	0	A10AE Insulins and analogues for injection, long-acting	0.985
Dx_cancer	E	p6m	A10BA	0.566672	0.0941201	0	0	1.30117	0.193	0	A10BA Biguanides [DG:DG01684]	0.54
Dx_cancer	E	p6m	B01AC	0.23654	0.24717	0	-1	-0.0408724	0.967	0	B01AC Platelet aggregation inhibitors excl. heparin	0.985
Dx_cancer	E	p6m	C07AB	-0.292516	0.14472	0	-1	-1.47542	0.14	0	C07AB Beta blocking AGE>70nts, selective	0.54
Dx_cancer	E	p6m	C08CA	0.404703	0.0923784	-1	0	1.52424	0.127	0	C08CA Dihydropyridine derivatives [DG:DG01928]	0.54
Dx_cancer	E	p6m	C09AA	-0.151879	-0.0108885	0	0	-0.568663	0.57	0	C09AA ACE inhibitors, plain [DG:DG01501]	0.985
Dx_cancer	E	p6m	C09CA	0.070444	0.0651772	0	0	0.0182965	0.985	0	C09CA Angiotensin II receptor blockers, plain [DG:DG01495]	0.985
Dx_cancer	E	p6m	C10AA	0.0991865	0.133592	0	-1	-0.19927	0.842	0	C10AA HMG CoA reductase inhibitors [DG:DG01660]	0.985
Dx_cancer	E	p6m	G03CA	-0.208942	0.220029	0	-1	-0.846946	0.397	0	G03CA Natural and semisynthetic estrogens, plain	0.794
Dx_cancer	E	p6m	G04CB	-0.124062	-0.0618812	0	0	-0.0972463	0.923	0	G04CB Testosterone-5-alpha reductase inhibitors	0.985
Dx_cancer	E	p6m	H03AA	0.0590531	0.0153579	0	0	0.174629	0.861	0	H03AA Thyroid hormones	0.985
Dx_cancer	E	p6m	R03BA	-0.0497779	0.537819	0	-1	-1.01154	0.312	0	R03BA Glucocorticoids	0.728
Dx_cancer	F	p6m	A02BC	-0.00841919	-0.342573	0	1	1.99527	0.046	-1	A02BC Proton pump inhibitors [DG:DG01646]	0.644
Dx_cancer	F	p6m	A03AA	0.450541	-0.510229	0	1	1.57639	0.115	0	A03AA Synthetic anticholinergics, esters with tertiary amino group	0.672
Dx_cancer	F	p6m	A10AE	-1.45861	-0.611422	0	1	-0.521828	0.602	0	A10AE Insulins and analogues for injection, long-acting	0.932
Dx_cancer	F	p6m	A10BA	0.408523	0.0159652	0	0	1.037	0.3	0	A10BA Biguanides [DG:DG01684]	0.723
Dx_cancer	F	p6m	B01AC	-0.148383	-0.125681	0	0	-0.0858745	0.932	0	B01AC Platelet aggregation inhibitors excl. heparin	0.932
Dx_cancer	F	p6m	C07AB	-0.644982	-0.218297	1	1	-1.40427	0.16	0	C07AB Beta blocking AGE>70nts, selective	0.672
Dx_cancer	F	p6m	C08CA	0.173838	-0.107981	0	0	1.30596	0.192	0	C08CA Dihydropyridine derivatives [DG:DG01928]	0.672
Dx_cancer	F	p6m	C09AA	-0.251744	-0.149009	0	1	-0.39884	0.69	0	C09AA ACE inhibitors, plain [DG:DG01501]	0.932
Dx_cancer	F	p6m	C09CA	-0.199722	-0.171573	0	1	-0.092637	0.926	0	C09CA Angiotensin II receptor blockers, plain [DG:DG01495]	0.932
Dx_cancer	F	p6m	C10AA	-0.0212637	-0.0609337	0	0	0.219408	0.826	0	C10AA HMG CoA reductase inhibitors [DG:DG01660]	0.932
Dx_cancer	F	p6m	G03CA	-0.78552	-0.448256	0	1	-0.646295	0.518	0	G03CA Natural and semisynthetic estrogens, plain	0.932
Dx_cancer	F	p6m	G04CB	-0.213303	-0.477961	0	1	0.399416	0.69	0	G04CB Testosterone-5-alpha reductase inhibitors	0.932
Dx_cancer	F	p6m	H03AA	-0.179654	-0.2227	0	1	0.16332	0.87	0	H03AA Thyroid hormones	0.932
Dx_cancer	F	p6m	R03BA	-0.686662	-0.0769743	0	0	-1.01572	0.31	0	R03BA Glucocorticoids	0.723
Dx_cancer	G	p6m	A02BC	0.0994797	-0.394959	0	1	1.91426	0.0556	0	A02BC Proton pump inhibitors [DG:DG01646]	0.777
Dx_cancer	G	p6m	A03AA	0.577131	-0.375254	0	0	1.08358	0.279	0	A03AA Synthetic anticholinergics, esters with tertiary amino group	0.907
Dx_cancer	G	p6m	A10AE	-14.4925	-0.167327	0	0	-0.0171995	0.986	0	A10AE Insulins and analogues for injection, long-acting	0.986
Dx_cancer	G	p6m	A10BA	0.605556	-0.21721	0	0	1.59553	0.111	0	A10BA Biguanides [DG:DG01684]	0.777
Dx_cancer	G	p6m	B01AC	-0.120043	-0.241787	0	1	0.32782	0.743	0	B01AC Platelet aggregation inhibitors excl. heparin	0.907
Dx_cancer	G	p6m	C07AB	-0.588149	-0.246518	0	1	-0.7906	0.429	0	C07AB Beta blocking AGE>70nts, selective	0.907
Dx_cancer	G	p6m	C08CA	-0.0143492	-0.25046	0	1	0.707062	0.48	0	C08CA Dihydropyridine derivatives [DG:DG01928]	0.907
Dx_cancer	G	p6m	C09AA	-0.491991	-0.377022	0	1	-0.283138	0.777	0	C09AA ACE inhibitors, plain [DG:DG01501]	0.907
Dx_cancer	G	p6m	C09CA	-0.296777	-0.335807	0	1	0.0857751	0.932	0	C09CA Angiotensin II receptor blockers, plain [DG:DG01495]	0.986
Dx_cancer	G	p6m	C10AA	-0.194526	-0.440541	0	1	0.888147	0.374	0	C10AA HMG CoA reductase inhibitors [DG:DG01660]	0.907
Dx_cancer	G	p6m	G03CA	-0.935125	-0.333684	0	0	-0.568462	0.57	0	G03CA Natural and semisynthetic estrogens, plain	0.907
Dx_cancer	G	p6m	G04CB	-0.295926	-0.539643	0	1	0.288377	0.773	0	G04CB Testosterone-5-alpha reductase inhibitors	0.907
Dx_cancer	G	p6m	H03AA	0.0399392	-0.46323	0	1	1.2516	0.211	0	H03AA Thyroid hormones	0.907
Dx_cancer	G	p6m	R03BA	-0.710956	-0.353929	0	0	-0.409611	0.682	0	R03BA Glucocorticoids	0.907
Dx_cancer	H	p6m	A02BC	0.588767	-0.13716	0	0	1.17132	0.241	0	A02BC Proton pump inhibitors [DG:DG01646]	1
Dx_cancer	H	p6m	A03AA	-14.1077	-14.1069	0	0	-3.74309e-07	1	0	A03AA Synthetic anticholinergics, esters with tertiary amino group	1
Dx_cancer	H	p6m	A10AE	-13.8366	0.727068	0	0	-0.0070497	0.994	0	A10AE Insulins and analogues for injection, long-acting	1
Dx_cancer	H	p6m	A10BA	0.126338	-0.305337	0	0	0.23531	0.814	0	A10BA Biguanides [DG:DG01684]	1
Dx_cancer	H	p6m	B01AC	-0.967864	0.0845771	0	0	-0.911153	0.362	0	B01AC Platelet aggregation inhibitors excl. heparin	1
Dx_cancer	H	p6m	C07AB	-2.46673	0.29531	0	0	-1.28538	0.199	0	C07AB Beta blocking AGE>70nts, selective	1
Dx_cancer	H	p6m	C08CA	-0.673606	-0.162828	0	0	-0.580429	0.562	0	C08CA Dihydropyridine derivatives [DG:DG01928]	1
Dx_cancer	H	p6m	C09AA	-0.571887	-0.387227	0	0	-0.191067	0.848	0	C09AA ACE inhibitors, plain [DG:DG01501]	1
Dx_cancer	H	p6m	C09CA	0.149116	-0.193788	0	0	0.374225	0.708	0	C09CA Angiotensin II receptor blockers, plain [DG:DG01495]	1
Dx_cancer	H	p6m	C10AA	-0.0405298	-0.268682	0	0	0.348081	0.728	0	C10AA HMG CoA reductase inhibitors [DG:DG01660]	1
Dx_cancer	H	p6m	G03CA	-13.8433	-0.776718	0	0	-0.00742055	0.994	0	G03CA Natural and semisynthetic estrogens, plain	1
Dx_cancer	H	p6m	G04CB	-16.2896	-0.804374	0	0	-0.00622667	0.995	0	G04CB Testosterone-5-alpha reductase inhibitors	1
Dx_cancer	H	p6m	H03AA	-0.600424	0.276409	0	0	-0.590349	0.555	0	H03AA Thyroid hormones	1
Dx_cancer	H	p6m	R03BA	-15.4612	-0.649732	0	0	-0.0081335	0.994	0	R03BA Glucocorticoids	1
HT	A	p6m	A02BC	-0.0800364	-0.132322	0	0	0.278268	0.781	0	A02BC Proton pump inhibitors [DG:DG01646]	0.958
HT	A	p6m	A03AA	0.964897	-0.180267	0	0	1.20479	0.228	0	A03AA Synthetic anticholinergics, esters with tertiary amino group	0.958
HT	A	p6m	A10AE	0.531038	0.470939	0	0	0.0526241	0.958	0	A10AE Insulins and analogues for injection, long-acting	0.958
HT	A	p6m	A10BA	-0.407024	-0.317037	0	0	-0.23061	0.818	0	A10BA Biguanides [DG:DG01684]	0.958
HT	A	p6m	B01AC	-0.180947	-0.286053	0	0	0.3664	0.714	0	B01AC Platelet aggregation inhibitors excl. heparin	0.958
HT	A	p6m	C07AB	-0.0138115	0.0121584	0	0	-0.089645	0.929	0	C07AB Beta blocking AGE>70nts, selective	0.958
HT	A	p6m	C08CA	-0.225057	-0.329869	0	0	0.41815	0.676	0	C08CA Dihydropyridine derivatives [DG:DG01928]	0.958
HT	A	p6m	C09AA	-0.371135	-0.405323	1	0	0.126225	0.9	0	C09AA ACE inhibitors, plain [DG:DG01501]	0.958
HT	A	p6m	C09CA	-0.430337	0.123163	1	0	-1.55329	0.12	0	C09CA Angiotensin II receptor blockers, plain [DG:DG01495]	0.958
HT	A	p6m	C10AA	-0.499001	-0.648778	1	1	0.771028	0.441	0	C10AA HMG CoA reductase inhibitors [DG:DG01660]	0.958
HT	A	p6m	G03CA	0.184938	0.046156	0	0	0.253619	0.8	0	G03CA Natural and semisynthetic estrogens, plain	0.958
HT	A	p6m	G04CB	-0.332617	-0.208684	0	0	-0.190748	0.849	0	G04CB Testosterone-5-alpha reductase inhibitors	0.958
HT	A	p6m	H03AA	-0.371049	-0.259536	0	0	-0.331634	0.74	0	H03AA Thyroid hormones	0.958
HT	A	p6m	R03BA	-0.578966	-0.690689	0	1	0.214068	0.83	0	R03BA Glucocorticoids	0.958
HT	B	p6m	A02BC	0.281368	0.278506	0	0	0.00645103	0.995	0	A02BC Proton pump inhibitors [DG:DG01646]	0.999
HT	B	p6m	A03AA	-13.8766	-15.6629	0	0	0.000737328	0.999	0	A03AA Synthetic anticholinergics, esters with tertiary amino group	0.999
HT	B	p6m	A10AE	1.0117	1.23678	0	0	-0.12295	0.902	0	A10AE Insulins and analogues for injection, long-acting	0.999
HT	B	p6m	A10BA	-0.443448	-0.0372795	0	0	-0.391895	0.695	0	A10BA Biguanides [DG:DG01684]	0.999
HT	B	p6m	B01AC	-0.0878742	0.167674	0	0	-0.431818	0.666	0	B01AC Platelet aggregation inhibitors excl. heparin	0.999
HT	B	p6m	C07AB	0.368897	1.00473	0	-1	-1.14618	0.252	0	C07AB Beta blocking AGE>70nts, selective	0.917
HT	B	p6m	C08CA	-0.0188079	-0.434222	0	0	0.55664	0.578	0	C08CA Dihydropyridine derivatives [DG:DG01928]	0.999
HT	B	p6m	C09AA	0.00445171	-1.11512	0	0	1.12081	0.262	0	C09AA ACE inhibitors, plain [DG:DG01501]	0.917
HT	B	p6m	C09CA	-0.226693	1.64123	0	-1	-2.5117	0.012	1	C09CA Angiotensin II receptor blockers, plain [DG:DG01495]	0.168
HT	B	p6m	C10AA	-0.299275	0.361937	0	0	-1.55622	0.12	0	C10AA HMG CoA reductase inhibitors [DG:DG01660]	0.84
HT	B	p6m	G03CA	-14.5984	0.705657	0	0	-0.0198068	0.984	0	G03CA Natural and semisynthetic estrogens, plain	0.999
HT	B	p6m	G04CB	-0.538153	-2.10877	0	0	0.751033	0.453	0	G04CB Testosterone-5-alpha reductase inhibitors	0.999
HT	B	p6m	H03AA	0.365323	0.706678	0	0	-0.482989	0.629	0	H03AA Thyroid hormones	0.999
HT	B	p6m	R03BA	-0.699978	-16.1942	0	0	0.00783775	0.994	0	R03BA Glucocorticoids	0.999
HT	C	p6m	A02BC	0.225703	0.333366	-1	-1	-0.744049	0.457	0	A02BC Proton pump inhibitors [DG:DG01646]	0.793
HT	C	p6m	A03AA	0.214658	0.443975	0	0	-0.361402	0.718	0	A03AA Synthetic anticholinergics, esters with tertiary amino group	0.793
HT	C	p6m	A10AE	0.0303162	0.476651	0	0	-0.663552	0.507	0	A10AE Insulins and analogues for injection, long-acting	0.793
HT	C	p6m	A10BA	-0.0728909	-0.0814064	0	0	0.028953	0.977	0	A10BA Biguanides [DG:DG01684]	0.977
HT	C	p6m	B01AC	-0.0269532	0.254257	0	0	-1.29485	0.195	0	B01AC Platelet aggregation inhibitors excl. heparin	0.793
HT	C	p6m	C07AB	-0.11542	0.326564	0	0	-1.97897	0.0478	1	C07AB Beta blocking AGE>70nts, selective	0.394
HT	C	p6m	C08CA	-0.115867	0.0415824	0	0	-0.786805	0.431	0	C08CA Dihydropyridine derivatives [DG:DG01928]	0.793
HT	C	p6m	C09AA	-0.354475	-0.152111	1	0	-0.915414	0.36	0	C09AA ACE inhibitors, plain [DG:DG01501]	0.793
HT	C	p6m	C09CA	-0.245465	0.280319	0	0	-1.90846	0.0563	0	C09CA Angiotensin II receptor blockers, plain [DG:DG01495]	0.394
HT	C	p6m	C10AA	-0.28081	-0.218362	1	1	-0.418514	0.676	0	C10AA HMG CoA reductase inhibitors [DG:DG01660]	0.793
HT	C	p6m	G03CA	0.176444	0.325182	0	0	-0.349832	0.726	0	G03CA Natural and semisynthetic estrogens, plain	0.793
HT	C	p6m	G04CB	-0.254501	-0.0932722	0	0	-0.337575	0.736	0	G04CB Testosterone-5-alpha reductase inhibitors	0.793
HT	C	p6m	H03AA	-0.263025	-0.13125	0	0	-0.496438	0.62	0	H03AA Thyroid hormones	0.793
HT	C	p6m	R03BA	0.373581	0.0105219	0	0	0.859704	0.39	0	R03BA Glucocorticoids	0.793
HT	D	p6m	A02BC	0.437839	0.468513	0	0	-0.0742107	0.941	0	A02BC Proton pump inhibitors [DG:DG01646]	0.999
HT	D	p6m	A03AA	-13.1392	-15.2271	0	0	0.00101059	0.999	0	A03AA Synthetic anticholinergics, esters with tertiary amino group	0.999
HT	D	p6m	A10AE	0.662877	2.34095	0	-1	-1.2821	0.2	0	A10AE Insulins and analogues for injection, long-acting	0.56
HT	D	p6m	A10BA	-0.442897	0.402274	0	0	-0.935476	0.35	0	A10BA Biguanides [DG:DG01684]	0.731
HT	D	p6m	B01AC	0.0200513	0.682519	0	0	-1.30977	0.19	0	B01AC Platelet aggregation inhibitors excl. heparin	0.56
HT	D	p6m	C07AB	0.205357	0.981004	0	-1	-1.52366	0.128	0	C07AB Beta blocking AGE>70nts, selective	0.56
HT	D	p6m	C08CA	-0.117108	-0.22085	0	0	0.149023	0.882	0	C08CA Dihydropyridine derivatives [DG:DG01928]	0.999
HT	D	p6m	C09AA	-0.295796	-0.947935	0	0	0.722056	0.47	0	C09AA ACE inhibitors, plain [DG:DG01501]	0.731
HT	D	p6m	C09CA	-0.25995	1.20525	0	-1	-2.25398	0.0242	1	C09CA Angiotensin II receptor blockers, plain [DG:DG01495]	0.339
HT	D	p6m	C10AA	-0.380399	0.356132	0	0	-1.88179	0.0599	0	C10AA HMG CoA reductase inhibitors [DG:DG01660]	0.419
HT	D	p6m	G03CA	-13.6134	0.759889	0	0	-0.0258086	0.979	0	G03CA Natural and semisynthetic estrogens, plain	0.999
HT	D	p6m	G04CB	-0.314756	-1.93351	0	0	0.819447	0.413	0	G04CB Testosterone-5-alpha reductase inhibitors	0.731
HT	D	p6m	H03AA	0.176419	0.666714	0	0	-0.787838	0.431	0	H03AA Thyroid hormones	0.731
HT	D	p6m	R03BA	0.0860536	-14.6438	0	0	0.0127838	0.99	0	R03BA Glucocorticoids	0.999
HT	E	p6m	A02BC	0.260687	0.459132	-1	-1	-2.32402	0.0201	1	A02BC Proton pump inhibitors [DG:DG01646]	0.0613
HT	E	p6m	A03AA	-0.102908	0.454544	0	0	-1.29079	0.197	0	A03AA Synthetic anticholinergics, esters with tertiary amino group	0.394
HT	E	p6m	A10AE	-0.302654	-0.0787529	0	0	-0.42712	0.669	0	A10AE Insulins and analogues for injection, long-acting	0.707
HT	E	p6m	A10BA	0.153332	0.0873277	0	0	0.375489	0.707	0	A10BA Biguanides [DG:DG01684]	0.707
HT	E	p6m	B01AC	0.0890307	0.420975	0	-1	-2.5421	0.011	1	B01AC Platelet aggregation inhibitors excl. heparin	0.0613
HT	E	p6m	C07AB	-0.0162032	0.309165	0	-1	-2.40111	0.0163	1	C07AB Beta blocking AGE>70nts, selective	0.0613
HT	E	p6m	C08CA	0.00206844	0.261594	0	-1	-2.40971	0.016	1	C08CA Dihydropyridine derivatives [DG:DG01928]	0.0613
HT	E	p6m	C09AA	-0.113333	0.14916	0	0	-2.29205	0.0219	1	C09AA ACE inhibitors, plain [DG:DG01501]	0.0613
HT	E	p6m	C09CA	0.0274275	0.148285	0	0	-0.744106	0.457	0	C09CA Angiotensin II receptor blockers, plain [DG:DG01495]	0.64
HT	E	p6m	C10AA	0.0275868	0.208289	0	-1	-2.13595	0.0327	1	C10AA HMG CoA reductase inhibitors [DG:DG01660]	0.0763
HT	E	p6m	G03CA	0.0469282	0.239083	0	-1	-0.77084	0.441	0	G03CA Natural and semisynthetic estrogens, plain	0.64
HT	E	p6m	G04CB	-0.204854	0.0257756	0	0	-0.755267	0.45	0	G04CB Testosterone-5-alpha reductase inhibitors	0.64
HT	E	p6m	H03AA	-0.0343843	0.0590737	0	0	-0.638427	0.523	0	H03AA Thyroid hormones	0.666
HT	E	p6m	R03BA	0.579494	0.484261	-1	-1	0.442862	0.658	0	R03BA Glucocorticoids	0.707
HT	F	p6m	A02BC	-0.328116	-0.305903	1	1	-0.248345	0.804	0	A02BC Proton pump inhibitors [DG:DG01646]	0.934
HT	F	p6m	A03AA	-0.554174	-0.307798	0	0	-0.546649	0.585	0	A03AA Synthetic anticholinergics, esters with tertiary amino group	0.889
HT	F	p6m	A10AE	-0.61824	-0.620599	0	0	0.00429409	0.997	0	A10AE Insulins and analogues for injection, long-acting	0.997
HT	F	p6m	A10BA	0.115632	-0.0483409	0	0	0.852923	0.394	0	A10BA Biguanides [DG:DG01684]	0.889
HT	F	p6m	B01AC	-0.189859	-0.0717629	1	0	-0.861155	0.389	0	B01AC Platelet aggregation inhibitors excl. heparin	0.889
HT	F	p6m	C07AB	-0.28635	-0.208026	1	0	-0.554107	0.58	0	C07AB Beta blocking AGE>70nts, selective	0.889
HT	F	p6m	C08CA	-0.154549	-0.0186872	1	0	-1.17243	0.241	0	C08CA Dihydropyridine derivatives [DG:DG01928]	0.889
HT	F	p6m	C09AA	-0.175394	-0.112943	1	0	-0.509156	0.611	0	C09AA ACE inhibitors, plain [DG:DG01501]	0.889
HT	F	p6m	C09CA	-0.175723	-0.205023	1	0	0.167963	0.867	0	C09CA Angiotensin II receptor blockers, plain [DG:DG01495]	0.934
HT	F	p6m	C10AA	-0.129888	0.0021628	0	0	-1.45927	0.144	0	C10AA HMG CoA reductase inhibitors [DG:DG01660]	0.889
HT	F	p6m	G03CA	-0.560556	-0.437397	1	1	-0.474769	0.635	0	G03CA Natural and semisynthetic estrogens, plain	0.889
HT	F	p6m	G04CB	-0.578959	-0.398806	1	0	-0.568665	0.57	0	G04CB Testosterone-5-alpha reductase inhibitors	0.889
HT	F	p6m	H03AA	-0.232656	-0.198332	0	1	-0.221764	0.824	0	H03AA Thyroid hormones	0.934
HT	F	p6m	R03BA	0.129	-0.222094	0	0	1.53129	0.126	0	R03BA Glucocorticoids	0.889
HT	G	p6m	A02BC	-0.319488	-0.380196	1	1	0.416636	0.677	0	A02BC Proton pump inhibitors [DG:DG01646]	0.936
HT	G	p6m	A03AA	-0.195584	-0.247316	0	0	0.0799479	0.936	0	A03AA Synthetic anticholinergics, esters with tertiary amino group	0.936
HT	G	p6m	A10AE	-0.270838	-0.142772	0	0	-0.184827	0.853	0	A10AE Insulins and analogues for injection, long-acting	0.936
HT	G	p6m	A10BA	-0.105487	-0.204228	0	0	0.323663	0.746	0	A10BA Biguanides [DG:DG01684]	0.936
HT	G	p6m	B01AC	-0.27007	-0.18665	1	0	-0.378655	0.705	0	B01AC Platelet aggregation inhibitors excl. heparin	0.936
HT	G	p6m	C07AB	-0.348257	-0.140004	1	0	-0.928004	0.353	0	C07AB Beta blocking AGE>70nts, selective	0.936
HT	G	p6m	C08CA	-0.259777	-0.216948	1	0	-0.20883	0.835	0	C08CA Dihydropyridine derivatives [DG:DG01928]	0.936
HT	G	p6m	C09AA	-0.398889	-0.374691	1	0	-0.107554	0.914	0	C09AA ACE inhibitors, plain [DG:DG01501]	0.936
HT	G	p6m	C09CA	-0.415109	-0.0317691	1	0	-1.35409	0.176	0	C09CA Angiotensin II receptor blockers, plain [DG:DG01495]	0.936
HT	G	p6m	C10AA	-0.435078	-0.412029	1	1	-0.150573	0.88	0	C10AA HMG CoA reductase inhibitors [DG:DG01660]	0.936
HT	G	p6m	G03CA	-0.424109	-0.338631	0	0	-0.198063	0.843	0	G03CA Natural and semisynthetic estrogens, plain	0.936
HT	G	p6m	G04CB	-0.616715	-0.467024	1	0	-0.308609	0.758	0	G04CB Testosterone-5-alpha reductase inhibitors	0.936
HT	G	p6m	H03AA	-0.434119	-0.376092	1	1	-0.214694	0.83	0	H03AA Thyroid hormones	0.936
HT	G	p6m	R03BA	-0.0728132	-0.646741	0	1	1.33528	0.182	0	R03BA Glucocorticoids	0.936
HT	H	p6m	A02BC	-0.0497285	-0.0854146	0	0	0.0866472	0.931	0	A02BC Proton pump inhibitors [DG:DG01646]	1
HT	H	p6m	A03AA	-13.6927	-14.4433	0	0	0.000539638	1	0	A03AA Synthetic anticholinergics, esters with tertiary amino group	1
HT	H	p6m	A10AE	0.421454	1.42972	0	0	-0.759668	0.447	0	A10AE Insulins and analogues for injection, long-acting	0.744
HT	H	p6m	A10BA	-0.47847	0.259728	0	0	-0.824386	0.41	0	A10BA Biguanides [DG:DG01684]	0.744
HT	H	p6m	B01AC	-0.157441	0.327095	0	0	-0.933106	0.351	0	B01AC Platelet aggregation inhibitors excl. heparin	0.744
HT	H	p6m	C07AB	0.00650965	0.605636	0	0	-1.17027	0.242	0	C07AB Beta blocking AGE>70nts, selective	0.744
HT	H	p6m	C08CA	-0.220152	-0.365445	0	0	0.206851	0.836	0	C08CA Dihydropyridine derivatives [DG:DG01928]	1
HT	H	p6m	C09AA	-0.323433	-1.11148	0	0	0.870166	0.384	0	C09AA ACE inhibitors, plain [DG:DG01501]	0.744
HT	H	p6m	C09CA	-0.401547	0.878943	0	0	-1.94048	0.0523	0	C09CA Angiotensin II receptor blockers, plain [DG:DG01495]	0.527
HT	H	p6m	C10AA	-0.517779	0.195307	1	0	-1.77891	0.0753	0	C10AA HMG CoA reductase inhibitors [DG:DG01660]	0.527
HT	H	p6m	G03CA	-14.2451	0.166325	0	0	-0.0249837	0.98	0	G03CA Natural and semisynthetic estrogens, plain	1
HT	H	p6m	G04CB	-0.663832	-2.0686	0	0	0.709243	0.478	0	G04CB Testosterone-5-alpha reductase inhibitors	0.744
HT	H	p6m	H03AA	0.0107145	0.598995	0	0	-0.933443	0.351	0	H03AA Thyroid hormones	0.744
HT	H	p6m	R03BA	-0.327851	-15.3892	0	0	0.0121078	0.99	0	R03BA Glucocorticoids	1
SEX	A	p6m	A02BC	-0.159933	-0.0382983	0	0	-0.658715	0.51	0	A02BC Proton pump inhibitors [DG:DG01646]	0.919
SEX	A	p6m	A03AA	0.189179	0.211492	0	0	-0.0238242	0.981	0	A03AA Synthetic anticholinergics, esters with tertiary amino group	0.981
SEX	A	p6m	A10AE	-0.070049	0.979272	0	0	-0.936498	0.349	0	A10AE Insulins and analogues for injection, long-acting	0.919
SEX	A	p6m	A10BA	-0.326723	-0.468179	0	0	0.348405	0.728	0	A10BA Biguanides [DG:DG01684]	0.919
SEX	A	p6m	B01AC	-0.163109	-0.26716	0	0	0.348915	0.727	0	B01AC Platelet aggregation inhibitors excl. heparin	0.919
SEX	A	p6m	C07AB	-0.0432163	0.0180909	0	0	-0.21008	0.834	0	C07AB Beta blocking AGE>70nts, selective	0.919
SEX	A	p6m	C08CA	-0.222847	-0.268785	0	0	0.191054	0.848	0	C08CA Dihydropyridine derivatives [DG:DG01928]	0.919
SEX	A	p6m	C09AA	-0.406346	-0.320018	1	0	-0.334194	0.738	0	C09AA ACE inhibitors, plain [DG:DG01501]	0.919
SEX	A	p6m	C09CA	-0.38076	-0.165587	0	0	-0.681137	0.496	0	C09CA Angiotensin II receptor blockers, plain [DG:DG01495]	0.919
SEX	A	p6m	C10AA	-0.605208	-0.515007	1	1	-0.459534	0.646	0	C10AA HMG CoA reductase inhibitors [DG:DG01660]	0.919
SEX	A	p6m	G04CB	-0.405602	0.0302901	0	0	-1.10382	0.27	0	G04CB Testosterone-5-alpha reductase inhibitors	0.919
SEX	A	p6m	H03AA	-0.0355847	-0.356138	0	0	0.829418	0.407	0	H03AA Thyroid hormones	0.919
SEX	A	p6m	R03BA	-0.727717	-0.191223	0	0	-0.739874	0.459	0	R03BA Glucocorticoids	0.919
SEX	B	p6m	A02BC	-0.0337844	0.738571	0	-1	-1.77775	0.0754	0	A02BC Proton pump inhibitors [DG:DG01646]	0.98
SEX	B	p6m	A03AA	-14.9017	-14.7786	0	0	-6.6356e-05	1	0	A03AA Synthetic anticholinergics, esters with tertiary amino group	1
SEX	B	p6m	A10AE	0.88277	1.43428	0	0	-0.350551	0.726	0	A10AE Insulins and analogues for injection, long-acting	1
SEX	B	p6m	A10BA	-0.461598	0.12352	0	0	-0.643795	0.52	0	A10BA Biguanides [DG:DG01684]	1
SEX	B	p6m	B01AC	-0.0819044	0.404427	0	0	-0.864852	0.387	0	B01AC Platelet aggregation inhibitors excl. heparin	1
SEX	B	p6m	C07AB	0.563188	0.765723	0	0	-0.376485	0.707	0	C07AB Beta blocking AGE>70nts, selective	1
SEX	B	p6m	C08CA	0.0925251	-0.266114	0	0	0.645117	0.519	0	C08CA Dihydropyridine derivatives [DG:DG01928]	1
SEX	B	p6m	C09AA	-0.12307	-0.0729787	0	0	-0.0860995	0.931	0	C09AA ACE inhibitors, plain [DG:DG01501]	1
SEX	B	p6m	C09CA	0.291004	-0.218119	0	0	0.716839	0.473	0	C09CA Angiotensin II receptor blockers, plain [DG:DG01495]	1
SEX	B	p6m	C10AA	-0.280707	0.329964	0	0	-1.42764	0.153	0	C10AA HMG CoA reductase inhibitors [DG:DG01660]	0.994
SEX	B	p6m	G04CB	-0.738527	-0.664971	0	0	-0.0623443	0.95	0	G04CB Testosterone-5-alpha reductase inhibitors	1
SEX	B	p6m	H03AA	0.735309	0.448395	0	0	0.400344	0.689	0	H03AA Thyroid hormones	1
SEX	B	p6m	R03BA	-1.73746	-14.6972	0	0	0.00870083	0.993	0	R03BA Glucocorticoids	1
SEX	C	p6m	A02BC	0.225137	0.35041	-1	-1	-0.862798	0.388	0	A02BC Proton pump inhibitors [DG:DG01646]	0.982
SEX	C	p6m	A03AA	0.369565	0.305488	0	0	0.0984273	0.922	0	A03AA Synthetic anticholinergics, esters with tertiary amino group	0.982
SEX	C	p6m	A10AE	-0.256748	0.635321	0	0	-1.39347	0.163	0	A10AE Insulins and analogues for injection, long-acting	0.982
SEX	C	p6m	A10BA	-0.0583633	-0.171045	0	0	0.372473	0.71	0	A10BA Biguanides [DG:DG01684]	0.982
SEX	C	p6m	B01AC	0.100132	0.0255759	0	0	0.329296	0.742	0	B01AC Platelet aggregation inhibitors excl. heparin	0.982
SEX	C	p6m	C07AB	0.00659894	0.0586362	0	0	-0.233992	0.815	0	C07AB Beta blocking AGE>70nts, selective	0.982
SEX	C	p6m	C08CA	-0.0885185	-0.0275598	0	0	-0.32648	0.744	0	C08CA Dihydropyridine derivatives [DG:DG01928]	0.982
SEX	C	p6m	C09AA	-0.385224	-0.145046	1	0	-1.17652	0.239	0	C09AA ACE inhibitors, plain [DG:DG01501]	0.982
SEX	C	p6m	C09CA	-0.10696	-0.176151	0	0	0.282437	0.778	0	C09CA Angiotensin II receptor blockers, plain [DG:DG01495]	0.982
SEX	C	p6m	C10AA	-0.2492	-0.245751	1	1	-0.0225249	0.982	0	C10AA HMG CoA reductase inhibitors [DG:DG01660]	0.982
SEX	C	p6m	G03CA	-6.86216	0.237162	0	0	-0.0500804	0.96	0	G03CA Natural and semisynthetic estrogens, plain	0.982
SEX	C	p6m	G04CB	-0.266251	-8.02561	0	0	0.0491148	0.961	0	G04CB Testosterone-5-alpha reductase inhibitors	0.982
SEX	C	p6m	H03AA	-0.032821	-0.241735	0	0	0.744478	0.457	0	H03AA Thyroid hormones	0.982
SEX	C	p6m	R03BA	0.259938	0.131603	0	0	0.304812	0.761	0	R03BA Glucocorticoids	0.982
SEX	D	p6m	A02BC	0.214787	0.80511	0	-1	-1.45257	0.146	0	A02BC Proton pump inhibitors [DG:DG01646]	0.91
SEX	D	p6m	A03AA	-13.0899	-13.4989	0	0	0.000432401	1	0	A03AA Synthetic anticholinergics, esters with tertiary amino group	1
SEX	D	p6m	A10AE	0.444075	1.63621	0	0	-0.957879	0.338	0	A10AE Insulins and analogues for injection, long-acting	0.997
SEX	D	p6m	A10BA	-0.427176	0.0926214	0	0	-0.63669	0.524	0	A10BA Biguanides [DG:DG01684]	0.997
SEX	D	p6m	B01AC	0.169577	0.335802	0	0	-0.331564	0.74	0	B01AC Platelet aggregation inhibitors excl. heparin	0.997
SEX	D	p6m	C07AB	0.353764	0.565403	0	0	-0.438529	0.661	0	C07AB Beta blocking AGE>70nts, selective	0.997
SEX	D	p6m	C08CA	-0.0331998	-0.31774	0	0	0.55891	0.576	0	C08CA Dihydropyridine derivatives [DG:DG01928]	0.997
SEX	D	p6m	C09AA	-0.477858	-0.0365944	0	0	-0.829333	0.407	0	C09AA ACE inhibitors, plain [DG:DG01501]	0.997
SEX	D	p6m	C09CA	0.273218	-0.570105	0	0	1.29581	0.195	0	C09CA Angiotensin II receptor blockers, plain [DG:DG01495]	0.91
SEX	D	p6m	C10AA	-0.314682	0.251352	0	0	-1.43357	0.152	0	C10AA HMG CoA reductase inhibitors [DG:DG01660]	0.91
SEX	D	p6m	G03CA	-11.9606	-0.247019	0	0	-0.00155468	0.999	0	G03CA Natural and semisynthetic estrogens, plain	1
SEX	D	p6m	G04CB	-0.576576	-13.7145	0	0	0.00172678	0.999	0	G04CB Testosterone-5-alpha reductase inhibitors	1
SEX	D	p6m	H03AA	0.574724	0.238357	0	0	0.545042	0.586	0	H03AA Thyroid hormones	0.997
SEX	D	p6m	R03BA	-0.704326	-0.141263	0	0	-0.275084	0.783	0	R03BA Glucocorticoids	0.997
SEX	E	p6m	A02BC	0.312409	0.44154	-1	-1	-1.5544	0.12	0	A02BC Proton pump inhibitors [DG:DG01646]	0.917
SEX	E	p6m	A03AA	0.210811	0.263366	0	0	-0.120806	0.904	0	A03AA Synthetic anticholinergics, esters with tertiary amino group	0.969
SEX	E	p6m	A10AE	-0.576637	0.173263	0	0	-1.46511	0.143	0	A10AE Insulins and analogues for injection, long-acting	0.917
SEX	E	p6m	A10BA	0.105636	0.1261	0	0	-0.113561	0.91	0	A10BA Biguanides [DG:DG01684]	0.969
SEX	E	p6m	B01AC	0.242368	0.247717	-1	-1	-0.0393324	0.969	0	B01AC Platelet aggregation inhibitors excl. heparin	0.969
SEX	E	p6m	C07AB	0.128895	0.097389	0	0	0.230053	0.818	0	C07AB Beta blocking AGE>70nts, selective	0.969
SEX	E	p6m	C08CA	0.0537214	0.178884	0	-1	-1.17262	0.241	0	C08CA Dihydropyridine derivatives [DG:DG01928]	0.917
SEX	E	p6m	C09AA	-0.0739921	0.0532996	0	0	-1.1209	0.262	0	C09AA ACE inhibitors, plain [DG:DG01501]	0.917
SEX	E	p6m	C09CA	0.112769	0.0107162	0	0	0.718829	0.472	0	C09CA Angiotensin II receptor blockers, plain [DG:DG01495]	0.969
SEX	E	p6m	C10AA	0.134968	0.122298	-1	0	0.148946	0.882	0	C10AA HMG CoA reductase inhibitors [DG:DG01660]	0.969
SEX	E	p6m	G03CA	-7.01626	0.192701	0	-1	-0.0831764	0.934	0	G03CA Natural and semisynthetic estrogens, plain	0.969
SEX	E	p6m	G04CB	-0.114344	-8.0796	0	0	0.0824543	0.934	0	G04CB Testosterone-5-alpha reductase inhibitors	0.969
SEX	E	p6m	H03AA	-0.0993298	0.0613417	0	0	-0.938931	0.348	0	H03AA Thyroid hormones	0.969
SEX	E	p6m	R03BA	0.582395	0.463203	-1	-1	0.569734	0.569	0	R03BA Glucocorticoids	0.969
SEX	F	p6m	A02BC	-0.339325	-0.30192	1	1	-0.430018	0.667	0	A02BC Proton pump inhibitors [DG:DG01646]	0.883
SEX	F	p6m	A03AA	-0.435767	-0.413326	0	0	-0.0490157	0.961	0	A03AA Synthetic anticholinergics, esters with tertiary amino group	0.998
SEX	F	p6m	A10AE	-1.05917	-0.125312	1	0	-1.73168	0.0833	0	A10AE Insulins and analogues for injection, long-acting	0.361
SEX	F	p6m	A10BA	0.0331446	0.0438146	0	0	-0.054407	0.957	0	A10BA Biguanides [DG:DG01684]	0.998
SEX	F	p6m	B01AC	-0.153461	-0.0949972	0	0	-0.413269	0.679	0	B01AC Platelet aggregation inhibitors excl. heparin	0.883
SEX	F	p6m	C07AB	-0.27145	-0.209191	1	0	-0.438716	0.661	0	C07AB Beta blocking AGE>70nts, selective	0.883
SEX	F	p6m	C08CA	-0.156068	-0.00988523	1	0	-1.28761	0.198	0	C08CA Dihydropyridine derivatives [DG:DG01928]	0.515
SEX	F	p6m	C09AA	-0.218798	-0.0612343	1	0	-1.31022	0.19	0	C09AA ACE inhibitors, plain [DG:DG01501]	0.515
SEX	F	p6m	C09CA	-0.136278	-0.219763	0	1	0.55363	0.58	0	C09CA Angiotensin II receptor blockers, plain [DG:DG01495]	0.883
SEX	F	p6m	C10AA	-0.0887157	-0.0233379	0	0	-0.723125	0.47	0	C10AA HMG CoA reductase inhibitors [DG:DG01660]	0.883
SEX	F	p6m	G04CB	-0.470249	-0.469767	1	1	-0.00256778	0.998	0	G04CB Testosterone-5-alpha reductase inhibitors	0.998
SEX	F	p6m	H03AA	-0.360949	0.0353927	1	0	-1.95117	0.051	0	H03AA Thyroid hormones	0.331
SEX	F	p6m	R03BA	-0.0828004	-1.18537	0	1	2.2642	0.0236	-1	R03BA Glucocorticoids	0.307
SEX	G	p6m	A02BC	-0.364109	-0.330568	1	1	-0.230893	0.817	0	A02BC Proton pump inhibitors [DG:DG01646]	0.89
SEX	G	p6m	A03AA	-0.165123	-0.315105	0	0	0.22526	0.822	0	A03AA Synthetic anticholinergics, esters with tertiary amino group	0.89
SEX	G	p6m	A10AE	-0.705634	0.358368	0	0	-1.60612	0.108	0	A10AE Insulins and analogues for injection, long-acting	0.702
SEX	G	p6m	A10BA	-0.141383	-0.224188	0	0	0.265699	0.79	0	A10BA Biguanides [DG:DG01684]	0.89
SEX	G	p6m	B01AC	-0.216758	-0.275745	0	0	0.25828	0.796	0	B01AC Platelet aggregation inhibitors excl. heparin	0.89
SEX	G	p6m	C07AB	-0.30022	-0.213784	1	0	-0.385429	0.7	0	C07AB Beta blocking AGE>70nts, selective	0.89
SEX	G	p6m	C08CA	-0.272775	-0.178001	1	0	-0.497423	0.619	0	C08CA Dihydropyridine derivatives [DG:DG01928]	0.89
SEX	G	p6m	C09AA	-0.482362	-0.232542	1	0	-1.2056	0.228	0	C09AA ACE inhibitors, plain [DG:DG01501]	0.89
SEX	G	p6m	C09CA	-0.322998	-0.349074	1	0	0.104367	0.917	0	C09CA Angiotensin II receptor blockers, plain [DG:DG01495]	0.917
SEX	G	p6m	C10AA	-0.455384	-0.382868	1	1	-0.463664	0.643	0	C10AA HMG CoA reductase inhibitors [DG:DG01660]	0.89
SEX	G	p6m	G04CB	-0.594945	-0.408988	1	1	-0.617412	0.537	0	G04CB Testosterone-5-alpha reductase inhibitors	0.89
SEX	G	p6m	H03AA	-0.22717	0.701115	0	-1	-3.2244	0.00126	1	H03AA Thyroid hormones	0.0164
SEX	G	p6m	R03BA	-0.290103	-1.32491	0	0	1.00891	0.313	0	R03BA Glucocorticoids	0.89
SEX	H	p6m	A02BC	-0.304237	0.295563	0	0	-1.49127	0.136	0	A02BC Proton pump inhibitors [DG:DG01646]	0.771
SEX	H	p6m	A03AA	-13.5562	-14.0373	0	0	0.000496933	1	0	A03AA Synthetic anticholinergics, esters with tertiary amino group	1
SEX	H	p6m	A10AE	0.0727006	1.46272	0	0	-1.11122	0.266	0	A10AE Insulins and analogues for injection, long-acting	0.771
SEX	H	p6m	A10BA	-0.567593	0.192471	0	0	-0.923221	0.356	0	A10BA Biguanides [DG:DG01684]	0.771
SEX	H	p6m	B01AC	-0.0379977	0.0804973	0	0	-0.231654	0.817	0	B01AC Platelet aggregation inhibitors excl. heparin	1
SEX	H	p6m	C07AB	0.101718	0.382094	0	0	-0.575237	0.565	0	C07AB Beta blocking AGE>70nts, selective	1
SEX	H	p6m	C08CA	-0.130259	-0.363837	0	0	0.452523	0.651	0	C08CA Dihydropyridine derivatives [DG:DG01928]	1
SEX	H	p6m	C09AA	-0.589912	-0.0654646	0	0	-0.976243	0.329	0	C09AA ACE inhibitors, plain [DG:DG01501]	0.771
SEX	H	p6m	C09CA	0.0855418	-0.651087	0	0	1.12388	0.261	0	C09CA Angiotensin II receptor blockers, plain [DG:DG01495]	0.771
SEX	H	p6m	C10AA	-0.486976	0.148432	1	0	-1.58338	0.113	0	C10AA HMG CoA reductase inhibitors [DG:DG01660]	0.771
SEX	H	p6m	G04CB	-0.859795	-0.804931	0	0	-0.0493891	0.961	0	G04CB Testosterone-5-alpha reductase inhibitors	1
SEX	H	p6m	H03AA	0.452114	0.673483	0	0	-0.327271	0.743	0	H03AA Thyroid hormones	1
SEX	H	p6m	R03BA	-1.27624	-13.1995	0	0	0.0113571	0.991	0	R03BA Glucocorticoids	1
WHITE	A	p6m	A02BC	-0.148073	0.179319	0	0	-1.035	0.301	0	A02BC Proton pump inhibitors [DG:DG01646]	0.697
WHITE	A	p6m	A03AA	0.270898	-1.32815	0	0	0.790865	0.429	0	A03AA Synthetic anticholinergics, esters with tertiary amino group	0.697
WHITE	A	p6m	A10AE	0.619513	0.55951	0	0	0.0449989	0.964	0	A10AE Insulins and analogues for injection, long-acting	0.964
WHITE	A	p6m	A10BA	-0.455411	-0.0857514	1	0	-0.797866	0.425	0	A10BA Biguanides [DG:DG01684]	0.697
WHITE	A	p6m	B01AC	-0.198984	-0.281862	0	0	0.163355	0.87	0	B01AC Platelet aggregation inhibitors excl. heparin	0.942
WHITE	A	p6m	C07AB	-0.0362201	0.174888	0	0	-0.450876	0.652	0	C07AB Beta blocking AGE>70nts, selective	0.771
WHITE	A	p6m	C08CA	-0.354421	0.707226	1	-1	-2.95952	0.00308	1	C08CA Dihydropyridine derivatives [DG:DG01928]	0.04
WHITE	A	p6m	C09AA	-0.449983	-0.102059	1	0	-0.880103	0.379	0	C09AA ACE inhibitors, plain [DG:DG01501]	0.697
WHITE	A	p6m	C09CA	-0.350626	0.071947	1	0	-0.984156	0.325	0	C09CA Angiotensin II receptor blockers, plain [DG:DG01495]	0.697
WHITE	A	p6m	C10AA	-0.581286	-0.374813	1	0	-0.651517	0.515	0	C10AA HMG CoA reductase inhibitors [DG:DG01660]	0.744
WHITE	A	p6m	G03CA	0.0900007	-0.398078	0	0	0.550523	0.582	0	G03CA Natural and semisynthetic estrogens, plain	0.757
WHITE	A	p6m	G04CB	-0.350422	0.886997	0	0	-0.983221	0.325	0	G04CB Testosterone-5-alpha reductase inhibitors	0.697
WHITE	A	p6m	H03AA	-0.414125	0.551145	1	0	-1.71243	0.0868	0	H03AA Thyroid hormones	0.564
WHITE	A	p6m	R03BA	-0.452559		0					R03BA Glucocorticoids	NA
WHITE	B	p6m	A02BC	0.227273	1.90275	0	0	-1.44081	0.15	0	A02BC Proton pump inhibitors [DG:DG01646]	0.65
WHITE	B	p6m	A03AA	-13.1189	-19.3158	0	0	0.000186748	1	0	A03AA Synthetic anticholinergics, esters with tertiary amino group	1
WHITE	B	p6m	A10AE	0.829577	3.32167	0	0	-0.974065	0.33	0	A10AE Insulins and analogues for injection, long-acting	0.683
WHITE	B	p6m	A10BA	-0.414369	0.818056	0	0	-0.900117	0.368	0	A10BA Biguanides [DG:DG01684]	0.683
WHITE	B	p6m	B01AC	0.0881641	-1.31676	0	0	0.802831	0.422	0	B01AC Platelet aggregation inhibitors excl. heparin	0.686
WHITE	B	p6m	C07AB	0.636221	-0.708504	-1	0	1.06258	0.288	0	C07AB Beta blocking AGE>70nts, selective	0.683
WHITE	B	p6m	C08CA	-0.223094	1.32534	0	0	-1.55302	0.12	0	C08CA Dihydropyridine derivatives [DG:DG01928]	0.65
WHITE	B	p6m	C09AA	-0.129945	-0.267544	0	0	0.114921	0.909	0	C09AA ACE inhibitors, plain [DG:DG01501]	1
WHITE	B	p6m	C09CA	0.166682	-0.69789	0	0	0.597037	0.55	0	C09CA Angiotensin II receptor blockers, plain [DG:DG01495]	0.794
WHITE	B	p6m	C10AA	-0.0960947	0.367573	0	0	-0.463933	0.643	0	C10AA HMG CoA reductase inhibitors [DG:DG01660]	0.836
WHITE	B	p6m	G03CA	-0.42674	-14.9386	0	0	0.000993584	0.999	0	G03CA Natural and semisynthetic estrogens, plain	1
WHITE	B	p6m	G04CB	-0.920345	1.11783	0	0	-1.05943	0.289	0	G04CB Testosterone-5-alpha reductase inhibitors	0.683
WHITE	B	p6m	H03AA	0.334044	3.06032	0	-1	-1.98971	0.0466	1	H03AA Thyroid hormones	0.606
WHITE	B	p6m	R03BA	-1.0766		0					R03BA Glucocorticoids	NA
WHITE	C	p6m	A02BC	0.249753	0.490682	-1	-1	-1.0971	0.273	0	A02BC Proton pump inhibitors [DG:DG01646]	0.528
WHITE	C	p6m	A03AA	0.381369	-0.477594	0	0	0.602641	0.547	0	A03AA Synthetic anticholinergics, esters with tertiary amino group	0.685
WHITE	C	p6m	A10AE	0.0970674	0.323306	0	0	-0.305114	0.76	0	A10AE Insulins and analogues for injection, long-acting	0.818
WHITE	C	p6m	A10BA	-0.157786	0.168274	0	0	-1.03315	0.302	0	A10BA Biguanides [DG:DG01684]	0.528
WHITE	C	p6m	B01AC	0.105137	-0.0789006	0	0	0.543058	0.587	0	B01AC Platelet aggregation inhibitors excl. heparin	0.685
WHITE	C	p6m	C07AB	-0.0297952	0.482235	0	0	-1.65321	0.0983	0	C07AB Beta blocking AGE>70nts, selective	0.289
WHITE	C	p6m	C08CA	-0.141053	0.34536	0	0	-2.06622	0.0388	1	C08CA Dihydropyridine derivatives [DG:DG01928]	0.186
WHITE	C	p6m	C09AA	-0.379297	0.256415	1	0	-2.35413	0.0186	1	C09AA ACE inhibitors, plain [DG:DG01501]	0.186
WHITE	C	p6m	C09CA	-0.209926	0.267155	0	0	-1.56189	0.118	0	C09CA Angiotensin II receptor blockers, plain [DG:DG01495]	0.289
WHITE	C	p6m	C10AA	-0.263585	-0.0831097	1	0	-0.817919	0.413	0	C10AA HMG CoA reductase inhibitors [DG:DG01660]	0.642
WHITE	C	p6m	G03CA	0.280078	0.249126	0	0	0.043689	0.965	0	G03CA Natural and semisynthetic estrogens, plain	0.965
WHITE	C	p6m	G04CB	-0.277504	0.623535	0	0	-1.53883	0.124	0	G04CB Testosterone-5-alpha reductase inhibitors	0.289
WHITE	C	p6m	H03AA	-0.28524	0.443612	1	0	-2.05442	0.0399	1	H03AA Thyroid hormones	0.186
WHITE	C	p6m	R03BA	0.243288	-0.177158	0	0	0.599885	0.549	0	R03BA Glucocorticoids	0.685
WHITE	D	p6m	A02BC	0.424243	0.789123	-1	0	-0.502468	0.615	0	A02BC Proton pump inhibitors [DG:DG01646]	1
WHITE	D	p6m	A03AA	-12.6555	-17.8432	0	0	0.000346563	1	0	A03AA Synthetic anticholinergics, esters with tertiary amino group	1
WHITE	D	p6m	A10AE	0.799111	2.40041	0	0	-0.98835	0.323	0	A10AE Insulins and analogues for injection, long-acting	0.849
WHITE	D	p6m	A10BA	-0.311797	-0.0376239	0	0	-0.251562	0.801	0	A10BA Biguanides [DG:DG01684]	1
WHITE	D	p6m	B01AC	0.282794	-0.851616	0	0	0.908554	0.364	0	B01AC Platelet aggregation inhibitors excl. heparin	0.849
WHITE	D	p6m	C07AB	0.442165	-0.00670555	0	0	0.48572	0.627	0	C07AB Beta blocking AGE>70nts, selective	1
WHITE	D	p6m	C08CA	-0.234833	0.71447	0	0	-1.30495	0.192	0	C08CA Dihydropyridine derivatives [DG:DG01928]	0.849
WHITE	D	p6m	C09AA	-0.366356	-0.172582	0	0	-0.223703	0.823	0	C09AA ACE inhibitors, plain [DG:DG01501]	1
WHITE	D	p6m	C09CA	0.105645	-1.10316	0	0	0.922698	0.356	0	C09CA Angiotensin II receptor blockers, plain [DG:DG01495]	0.849
WHITE	D	p6m	C10AA	-0.123579	-0.0109461	0	0	-0.156842	0.875	0	C10AA HMG CoA reductase inhibitors [DG:DG01660]	1
WHITE	D	p6m	G03CA	-0.219941	-16.7082	0	0	0.00186718	0.999	0	G03CA Natural and semisynthetic estrogens, plain	1
WHITE	D	p6m	G04CB	-0.805235	0.87737	0	0	-1.1111	0.267	0	G04CB Testosterone-5-alpha reductase inhibitors	0.849
WHITE	D	p6m	H03AA	0.189245	1.98379	0	-1	-2.12215	0.0338	1	H03AA Thyroid hormones	0.473
WHITE	D	p6m	R03BA	-0.348794	-16.2259	0	0	0.00224004	0.998	0	R03BA Glucocorticoids	1
WHITE	E	p6m	A02BC	0.375518	0.449533	-1	-1	-0.497528	0.619	0	A02BC Proton pump inhibitors [DG:DG01646]	0.788
WHITE	E	p6m	A03AA	0.277469	-0.209124	0	0	0.553379	0.58	0	A03AA Synthetic anticholinergics, esters with tertiary amino group	0.788
WHITE	E	p6m	A10AE	-0.339243	0.147255	0	0	-0.813292	0.416	0	A10AE Insulins and analogues for injection, long-acting	0.788
WHITE	E	p6m	A10BA	0.0994051	0.230232	0	0	-0.619316	0.536	0	A10BA Biguanides [DG:DG01684]	0.788
WHITE	E	p6m	B01AC	0.2524	0.220211	-1	0	0.138444	0.89	0	B01AC Platelet aggregation inhibitors excl. heparin	0.922
WHITE	E	p6m	C07AB	0.0863201	0.452962	0	-1	-1.62772	0.104	0	C07AB Beta blocking AGE>70nts, selective	0.485
WHITE	E	p6m	C08CA	0.110516	0.0943112	0	0	0.0982253	0.922	0	C08CA Dihydropyridine derivatives [DG:DG01928]	0.922
WHITE	E	p6m	C09AA	-0.0513221	0.307703	0	0	-1.95345	0.0508	0	C09AA ACE inhibitors, plain [DG:DG01501]	0.485
WHITE	E	p6m	C09CA	0.0268465	0.362021	0	0	-1.63834	0.101	0	C09CA Angiotensin II receptor blockers, plain [DG:DG01495]	0.485
WHITE	E	p6m	C10AA	0.131336	0.206086	-1	0	-0.519017	0.604	0	C10AA HMG CoA reductase inhibitors [DG:DG01660]	0.788
WHITE	E	p6m	G03CA	0.183963	0.441037	0	0	-0.659329	0.51	0	G03CA Natural and semisynthetic estrogens, plain	0.788
WHITE	E	p6m	G04CB	-0.104453	0.388014	0	0	-0.997878	0.318	0	G04CB Testosterone-5-alpha reductase inhibitors	0.788
WHITE	E	p6m	H03AA	0.0208578	0.089811	0	0	-0.267211	0.789	0	H03AA Thyroid hormones	0.921
WHITE	E	p6m	R03BA	0.498223	0.688295	-1	-1	-0.578411	0.563	0	R03BA Glucocorticoids	0.788
WHITE	F	p6m	A02BC	-0.322551	-0.234006	1	0	-0.55267	0.58	0	A02BC Proton pump inhibitors [DG:DG01646]	0.767
WHITE	F	p6m	A03AA	-0.394707	-0.549745	0	0	0.165599	0.868	0	A03AA Synthetic anticholinergics, esters with tertiary amino group	0.89
WHITE	F	p6m	A10AE	-0.763822	-0.313059	1	0	-0.703736	0.482	0	A10AE Insulins and analogues for injection, long-acting	0.767
WHITE	F	p6m	A10BA	0.0116195	0.210115	0	0	-0.842845	0.399	0	A10BA Biguanides [DG:DG01684]	0.767
WHITE	F	p6m	B01AC	-0.109135	-0.269752	0	0	0.642527	0.521	0	B01AC Platelet aggregation inhibitors excl. heparin	0.767
WHITE	F	p6m	C07AB	-0.26563	-0.010613	1	0	-1.06873	0.285	0	C07AB Beta blocking AGE>70nts, selective	0.767
WHITE	F	p6m	C08CA	-0.0838355	-0.17946	0	0	0.530477	0.596	0	C08CA Dihydropyridine derivatives [DG:DG01928]	0.767
WHITE	F	p6m	C09AA	-0.187017	0.173446	1	0	-1.79423	0.0728	0	C09AA ACE inhibitors, plain [DG:DG01501]	0.767
WHITE	F	p6m	C09CA	-0.1953	0.0623757	1	0	-1.1586	0.247	0	C09CA Angiotensin II receptor blockers, plain [DG:DG01495]	0.767
WHITE	F	p6m	C10AA	-0.0512668	-0.0296445	0	0	-0.137864	0.89	0	C10AA HMG CoA reductase inhibitors [DG:DG01660]	0.89
WHITE	F	p6m	G03CA	-0.481872	-0.132851	1	0	-0.83017	0.406	0	G03CA Natural and semisynthetic estrogens, plain	0.767
WHITE	F	p6m	G04CB	-0.491746	-0.205742	1	0	-0.540555	0.589	0	G04CB Testosterone-5-alpha reductase inhibitors	0.767
WHITE	F	p6m	H03AA	-0.215667	-0.160332	1	0	-0.198469	0.843	0	H03AA Thyroid hormones	0.89
WHITE	F	p6m	R03BA	-0.119616	0.0686162	0	0	-0.519773	0.603	0	R03BA Glucocorticoids	0.767
WHITE	G	p6m	A02BC	-0.374489	-0.176724	1	0	-0.870637	0.384	0	A02BC Proton pump inhibitors [DG:DG01646]	0.597
WHITE	G	p6m	A03AA	-0.223664	-0.600567	0	0	0.258533	0.796	0	A03AA Synthetic anticholinergics, esters with tertiary amino group	0.857
WHITE	G	p6m	A10AE	-0.328425	-0.0724215	0	0	-0.330959	0.741	0	A10AE Insulins and analogues for injection, long-acting	0.857
WHITE	G	p6m	A10BA	-0.233546	0.157967	0	0	-1.18773	0.235	0	A10BA Biguanides [DG:DG01684]	0.514
WHITE	G	p6m	B01AC	-0.18908	-0.49681	0	0	0.871313	0.384	0	B01AC Platelet aggregation inhibitors excl. heparin	0.597
WHITE	G	p6m	C07AB	-0.319483	0.109112	1	0	-1.35469	0.176	0	C07AB Beta blocking AGE>70nts, selective	0.514
WHITE	G	p6m	C08CA	-0.296527	0.0774849	1	0	-1.5214	0.128	0	C08CA Dihydropyridine derivatives [DG:DG01928]	0.514
WHITE	G	p6m	C09AA	-0.472446	0.171238	1	0	-2.2868	0.0222	1	C09AA ACE inhibitors, plain [DG:DG01501]	0.311
WHITE	G	p6m	C09CA	-0.385381	0.00054975	1	0	-1.21046	0.226	0	C09CA Angiotensin II receptor blockers, plain [DG:DG01495]	0.514
WHITE	G	p6m	C10AA	-0.430461	-0.280703	1	0	-0.649913	0.516	0	C10AA HMG CoA reductase inhibitors [DG:DG01660]	0.722
WHITE	G	p6m	G03CA	-0.362916	-0.314411	0	0	-0.0667558	0.947	0	G03CA Natural and semisynthetic estrogens, plain	0.947
WHITE	G	p6m	G04CB	-0.618571	0.0800019	1	0	-1.1328	0.257	0	G04CB Testosterone-5-alpha reductase inhibitors	0.514
WHITE	G	p6m	H03AA	-0.484831	0.217639	1	0	-1.89151	0.0586	0	H03AA Thyroid hormones	0.41
WHITE	G	p6m	R03BA	-0.31859	-0.710604	0	0	0.5438	0.587	0	R03BA Glucocorticoids	0.747
WHITE	H	p6m	A02BC	-0.0785006	0.213492	0	0	-0.400551	0.689	0	A02BC Proton pump inhibitors [DG:DG01646]	1
WHITE	H	p6m	A03AA	-13.1811	-16.6335	0	0	0.000190944	1	0	A03AA Synthetic anticholinergics, esters with tertiary amino group	1
WHITE	H	p6m	A10AE	0.471638	1.74888	0	0	-0.72434	0.469	0	A10AE Insulins and analogues for injection, long-acting	1
WHITE	H	p6m	A10BA	-0.400258	0.0909388	0	0	-0.436917	0.662	0	A10BA Biguanides [DG:DG01684]	1
WHITE	H	p6m	B01AC	0.0890763	-1.28798	0	0	1.09004	0.276	0	B01AC Platelet aggregation inhibitors excl. heparin	1
WHITE	H	p6m	C07AB	0.190384	-0.0871303	0	0	0.291099	0.771	0	C07AB Beta blocking AGE>70nts, selective	1
WHITE	H	p6m	C08CA	-0.323893	0.367806	0	0	-0.916888	0.359	0	C08CA Dihydropyridine derivatives [DG:DG01928]	1
WHITE	H	p6m	C09AA	-0.46417	-0.285295	0	0	-0.187111	0.852	0	C09AA ACE inhibitors, plain [DG:DG01501]	1
WHITE	H	p6m	C09CA	-0.0517933	-1.27197	0	0	0.91956	0.358	0	C09CA Angiotensin II receptor blockers, plain [DG:DG01495]	1
WHITE	H	p6m	C10AA	-0.274038	-0.29816	0	0	0.0318683	0.975	0	C10AA HMG CoA reductase inhibitors [DG:DG01660]	1
WHITE	H	p6m	G03CA	-0.777875	-17.5378	0	0	0.00179743	0.999	0	G03CA Natural and semisynthetic estrogens, plain	1
WHITE	H	p6m	G04CB	-1.09748	0.792926	0	0	-1.20143	0.23	0	G04CB Testosterone-5-alpha reductase inhibitors	1
WHITE	H	p6m	H03AA	0.0332131	1.77898	0	-1	-1.86715	0.0619	0	H03AA Thyroid hormones	0.867
WHITE	H	p6m	R03BA	-0.81982	-16.2708	0	0	0.00201756	0.998	0	R03BA Glucocorticoids	1
AGE>70	A	p1yr	A02BC	-0.00579113	0.149226	0	0	-0.941983	0.346	0	A02BC Proton pump inhibitors [DG:DG01646]	0.854
AGE>70	A	p1yr	A03AA	0.633962	-0.0557067	0	0	1.05062	0.293	0	A03AA Synthetic anticholinergics, esters with tertiary amino group	0.854
AGE>70	A	p1yr	A10AE	0.338732	0.601967	0	0	-0.286758	0.774	0	A10AE Insulins and analogues for injection, long-acting	0.854
AGE>70	A	p1yr	A10BA	-0.245802	0.229725	0	0	-1.33147	0.183	0	A10BA Biguanides [DG:DG01684]	0.854
AGE>70	A	p1yr	B01AC	0.118825	-0.0942211	0	0	0.809832	0.418	0	B01AC Platelet aggregation inhibitors excl. heparin	0.854
AGE>70	A	p1yr	C07AB	0.309362	0.209074	0	0	0.397974	0.691	0	C07AB Beta blocking AGE>70nts, selective	0.854
AGE>70	A	p1yr	C08CA	-0.00214505	0.0263123	0	0	-0.134518	0.893	0	C08CA Dihydropyridine derivatives [DG:DG01928]	0.893
AGE>70	A	p1yr	C09AA	-0.227013	-0.0800077	0	0	-0.653684	0.513	0	C09AA ACE inhibitors, plain [DG:DG01501]	0.854
AGE>70	A	p1yr	C09CA	-0.0287104	-0.155009	0	0	0.454269	0.65	0	C09CA Angiotensin II receptor blockers, plain [DG:DG01495]	0.854
AGE>70	A	p1yr	C10AA	-0.436718	-0.190675	1	0	-1.33524	0.182	0	C10AA HMG CoA reductase inhibitors [DG:DG01660]	0.854
AGE>70	A	p1yr	G03CA	0.0533949	0.150448	0	0	-0.250832	0.802	0	G03CA Natural and semisynthetic estrogens, plain	0.854
AGE>70	A	p1yr	G04CB	-0.0510183	0.108538	0	0	-0.243729	0.807	0	G04CB Testosterone-5-alpha reductase inhibitors	0.854
AGE>70	A	p1yr	H03AA	-0.0226893	0.21159	0	0	-0.870265	0.384	0	H03AA Thyroid hormones	0.854
AGE>70	A	p1yr	J07AL	-0.159214	-0.495064	0	0	0.274304	0.784	0	J07AL Pneumococcal vaccines	0.854
AGE>70	A	p1yr	J07AP	-1.32657	0.747187	0	0	-1.67564	0.0938	0	J07AP Typhoid vaccines	0.854
AGE>70	A	p1yr	J07BB	0.160171	-0.0297324	0	0	0.677927	0.498	0	J07BB Influenza vaccines	0.854
AGE>70	A	p1yr	J07CA	-0.966691	-0.318603	0	0	-0.542653	0.587	0	J07CA Bacterial and viral vaccines, combined	0.854
AGE>70	A	p1yr	R03BA	-0.599155	-0.340956	0	0	-0.627366	0.53	0	R03BA Glucocorticoids	0.854
AGE>70	B	p1yr	A02BC	-0.396838	0.094273	0	0	-0.920964	0.357	0	A02BC Proton pump inhibitors [DG:DG01646]	1
AGE>70	B	p1yr	A03AA	-14.96	-16.1044	0	0	0.000400138	1	0	A03AA Synthetic anticholinergics, esters with tertiary amino group	1
AGE>70	B	p1yr	A10AE	0.401266	0.967074	0	0	-0.269629	0.787	0	A10AE Insulins and analogues for injection, long-acting	1
AGE>70	B	p1yr	A10BA	-0.271045	-1.11894	0	0	0.646445	0.518	0	A10BA Biguanides [DG:DG01684]	1
AGE>70	B	p1yr	B01AC	-0.562703	-0.208437	1	0	-0.395775	0.692	0	B01AC Platelet aggregation inhibitors excl. heparin	1
AGE>70	B	p1yr	C07AB	0.0115273	1.08822	0	0	-1.65001	0.0989	0	C07AB Beta blocking AGE>70nts, selective	0.909
AGE>70	B	p1yr	C08CA	-0.371343	0.356124	0	0	-1.19234	0.233	0	C08CA Dihydropyridine derivatives [DG:DG01928]	1
AGE>70	B	p1yr	C09AA	-0.209496	-0.595375	0	0	0.491382	0.623	0	C09AA ACE inhibitors, plain [DG:DG01501]	1
AGE>70	B	p1yr	C09CA	-0.125512	-0.511178	0	0	0.432744	0.665	0	C09CA Angiotensin II receptor blockers, plain [DG:DG01495]	1
AGE>70	B	p1yr	C10AA	-0.637702	0.278275	1	0	-1.63949	0.101	0	C10AA HMG CoA reductase inhibitors [DG:DG01660]	0.909
AGE>70	B	p1yr	G03CA	-0.78927	-15.4991	0	0	0.0122436	0.99	0	G03CA Natural and semisynthetic estrogens, plain	1
AGE>70	B	p1yr	G04CB	-0.437035	-16.1023	0	0	0.00367597	0.997	0	G04CB Testosterone-5-alpha reductase inhibitors	1
AGE>70	B	p1yr	H03AA	0.218506	0.369445	0	0	-0.189684	0.85	0	H03AA Thyroid hormones	1
AGE>70	B	p1yr	J07AL	-13.6513	-16.1961	0	0	0.000547576	1	0	J07AL Pneumococcal vaccines	1
AGE>70	B	p1yr	J07AP	-13.3013	-14.8617	0	0	0.000274235	1	0	J07AP Typhoid vaccines	1
AGE>70	B	p1yr	J07BB	-1.12173	-0.477705	1	0	-0.620292	0.535	0	J07BB Influenza vaccines	1
AGE>70	B	p1yr	J07CA	-13.7842	-15.0253	0	0	0.00033332	1	0	J07CA Bacterial and viral vaccines, combined	1
AGE>70	B	p1yr	R03BA	-1.28769	-15.9688	0	0	0.00967943	0.992	0	R03BA Glucocorticoids	1
AGE>70	C	p1yr	A02BC	0.248014	0.533361	-1	-1	-2.23062	0.0257	1	A02BC Proton pump inhibitors [DG:DG01646]	0.414
AGE>70	C	p1yr	A03AA	0.339577	0.177872	0	0	0.341837	0.732	0	A03AA Synthetic anticholinergics, esters with tertiary amino group	0.914
AGE>70	C	p1yr	A10AE	0.229558	-0.157351	0	0	0.706308	0.48	0	A10AE Insulins and analogues for injection, long-acting	0.782
AGE>70	C	p1yr	A10BA	-0.0574313	0.377933	0	-1	-1.71386	0.0866	0	A10BA Biguanides [DG:DG01684]	0.414
AGE>70	C	p1yr	B01AC	0.234708	0.116074	-1	0	0.568094	0.57	0	B01AC Platelet aggregation inhibitors excl. heparin	0.789
AGE>70	C	p1yr	C07AB	0.202066	0.385457	0	-1	-0.943857	0.345	0	C07AB Beta blocking AGE>70nts, selective	0.776
AGE>70	C	p1yr	C08CA	-0.0533275	0.209764	0	0	-1.61909	0.105	0	C08CA Dihydropyridine derivatives [DG:DG01928]	0.414
AGE>70	C	p1yr	C09AA	-0.322168	-0.0266959	1	0	-1.70338	0.0885	0	C09AA ACE inhibitors, plain [DG:DG01501]	0.414
AGE>70	C	p1yr	C09CA	-0.100709	0.0354645	0	0	-0.641748	0.521	0	C09CA Angiotensin II receptor blockers, plain [DG:DG01495]	0.782
AGE>70	C	p1yr	C10AA	-0.215712	0.0141689	1	0	-1.57801	0.115	0	C10AA HMG CoA reductase inhibitors [DG:DG01660]	0.414
AGE>70	C	p1yr	G03CA	-0.102661	0.119146	0	0	-0.723193	0.47	0	G03CA Natural and semisynthetic estrogens, plain	0.782
AGE>70	C	p1yr	G04CB	-0.0317693	0.0856592	0	0	-0.23761	0.812	0	G04CB Testosterone-5-alpha reductase inhibitors	0.914
AGE>70	C	p1yr	H03AA	-0.0400274	0.235113	0	0	-1.33281	0.183	0	H03AA Thyroid hormones	0.549
AGE>70	C	p1yr	J07AL	-0.577134	-0.64909	0	0	0.0738262	0.941	0	J07AL Pneumococcal vaccines	0.941
AGE>70	C	p1yr	J07AP	-0.36401	-0.0719223	0	0	-0.294915	0.768	0	J07AP Typhoid vaccines	0.914
AGE>70	C	p1yr	J07BB	-0.348081	-0.126553	1	0	-1.02262	0.306	0	J07BB Influenza vaccines	0.776
AGE>70	C	p1yr	J07CA	-1.32597	-0.597796	0	0	-0.703561	0.482	0	J07CA Bacterial and viral vaccines, combined	0.782
AGE>70	C	p1yr	R03BA	-0.0820391	-0.124478	0	0	0.129583	0.897	0	R03BA Glucocorticoids	0.941
AGE>70	D	p1yr	A02BC	-0.182075	0.497651	0	0	-1.29073	0.197	0	A02BC Proton pump inhibitors [DG:DG01646]	0.887
AGE>70	D	p1yr	A03AA	-12.9477	-14.5176	0	0	0.000949202	0.999	0	A03AA Synthetic anticholinergics, esters with tertiary amino group	0.999
AGE>70	D	p1yr	A10AE	0.434289	1.20264	0	0	-0.440819	0.659	0	A10AE Insulins and analogues for injection, long-acting	0.999
AGE>70	D	p1yr	A10BA	-0.264963	-0.831475	0	0	0.453631	0.65	0	A10BA Biguanides [DG:DG01684]	0.999
AGE>70	D	p1yr	B01AC	-0.2498	0.108282	0	0	-0.414694	0.678	0	B01AC Platelet aggregation inhibitors excl. heparin	0.999
AGE>70	D	p1yr	C07AB	0.0442212	1.23082	0	-1	-1.90586	0.0567	0	C07AB Beta blocking AGE>70nts, selective	0.624
AGE>70	D	p1yr	C08CA	-0.503025	0.46254	1	0	-1.62378	0.104	0	C08CA Dihydropyridine derivatives [DG:DG01928]	0.624
AGE>70	D	p1yr	C09AA	-0.453516	-0.836016	0	0	0.498736	0.618	0	C09AA ACE inhibitors, plain [DG:DG01501]	0.999
AGE>70	D	p1yr	C09CA	-0.232382	-0.187	0	0	-0.0550756	0.956	0	C09CA Angiotensin II receptor blockers, plain [DG:DG01495]	0.999
AGE>70	D	p1yr	C10AA	-0.697102	0.2766	1	0	-1.74658	0.0807	0	C10AA HMG CoA reductase inhibitors [DG:DG01660]	0.624
AGE>70	D	p1yr	G03CA	-0.891907	-14.9573	0	0	0.0136538	0.989	0	G03CA Natural and semisynthetic estrogens, plain	0.999
AGE>70	D	p1yr	G04CB	-0.182319	-14.9693	0	0	0.00774798	0.994	0	G04CB Testosterone-5-alpha reductase inhibitors	0.999
AGE>70	D	p1yr	H03AA	0.119212	0.633866	0	0	-0.696162	0.486	0	H03AA Thyroid hormones	0.999
AGE>70	D	p1yr	J07AL	-12.6651	-14.6265	0	0	0.00117394	0.999	0	J07AL Pneumococcal vaccines	0.999
AGE>70	D	p1yr	J07AP	-12.6745	-14.1247	0	0	0.000643806	0.999	0	J07AP Typhoid vaccines	0.999
AGE>70	D	p1yr	J07BB	-1.39869	-0.52154	1	0	-0.875964	0.381	0	J07BB Influenza vaccines	0.999
AGE>70	D	p1yr	J07CA	-12.7198	-14.1227	0	0	0.000931046	0.999	0	J07CA Bacterial and viral vaccines, combined	0.999
AGE>70	D	p1yr	R03BA	-0.91429	-15.5741	0	0	0.0110432	0.991	0	R03BA Glucocorticoids	0.999
AGE>70	E	p1yr	A02BC	0.261692	0.427278	-1	-1	-2.20127	0.0277	1	A02BC Proton pump inhibitors [DG:DG01646]	0.156
AGE>70	E	p1yr	A03AA	0.0849147	0.255295	0	0	-0.569227	0.569	0	A03AA Synthetic anticholinergics, esters with tertiary amino group	0.78
AGE>70	E	p1yr	A10AE	0.17793	-0.718489	0	1	2.11169	0.0347	-1	A10AE Insulins and analogues for injection, long-acting	0.156
AGE>70	E	p1yr	A10BA	0.0842072	0.215478	0	-1	-0.79275	0.428	0	A10BA Biguanides [DG:DG01684]	0.7
AGE>70	E	p1yr	B01AC	0.201092	0.239576	-1	-1	-0.319606	0.749	0	B01AC Platelet aggregation inhibitors excl. heparin	0.793
AGE>70	E	p1yr	C07AB	0.0713461	0.259636	0	-1	-1.58212	0.114	0	C07AB Beta blocking AGE>70nts, selective	0.29
AGE>70	E	p1yr	C08CA	-0.051362	0.185135	0	-1	-2.44356	0.0145	1	C08CA Dihydropyridine derivatives [DG:DG01928]	0.155
AGE>70	E	p1yr	C09AA	-0.205244	0.0390862	1	0	-2.38283	0.0172	1	C09AA ACE inhibitors, plain [DG:DG01501]	0.155
AGE>70	E	p1yr	C09CA	-0.0775557	0.14893	0	0	-1.79963	0.0719	0	C09CA Angiotensin II receptor blockers, plain [DG:DG01495]	0.234
AGE>70	E	p1yr	C10AA	0.0368391	0.162102	0	-1	-1.519	0.129	0	C10AA HMG CoA reductase inhibitors [DG:DG01660]	0.29
AGE>70	E	p1yr	G03CA	-0.109281	0.0167712	0	0	-0.716744	0.474	0	G03CA Natural and semisynthetic estrogens, plain	0.711
AGE>70	E	p1yr	G04CB	-0.00997648	-0.16572	0	0	0.51407	0.607	0	G04CB Testosterone-5-alpha reductase inhibitors	0.78
AGE>70	E	p1yr	H03AA	0.0197788	0.0741633	0	0	-0.442954	0.658	0	H03AA Thyroid hormones	0.79
AGE>70	E	p1yr	J07AL	-0.398672	-0.588474	0	1	0.360886	0.718	0	J07AL Pneumococcal vaccines	0.793
AGE>70	E	p1yr	J07AP	0.269347	-0.455492	0	0	1.45078	0.147	0	J07AP Typhoid vaccines	0.294
AGE>70	E	p1yr	J07BB	-0.394816	-0.1744	1	1	-1.76307	0.0779	0	J07BB Influenza vaccines	0.234
AGE>70	E	p1yr	J07CA	-0.555681	-0.446417	0	1	-0.242664	0.808	0	J07CA Bacterial and viral vaccines, combined	0.808
AGE>70	E	p1yr	R03BA	0.269917	0.0399645	0	0	1.30924	0.19	0	R03BA Glucocorticoids	0.342
AGE>70	F	p1yr	A02BC	-0.198873	-0.128385	1	1	-0.889637	0.374	0	A02BC Proton pump inhibitors [DG:DG01646]	0.842
AGE>70	F	p1yr	A03AA	-0.218673	-0.127567	0	0	-0.289187	0.772	0	A03AA Synthetic anticholinergics, esters with tertiary amino group	0.901
AGE>70	F	p1yr	A10AE	-0.0207201	-0.910783	0	1	1.99719	0.0458	-1	A10AE Insulins and analogues for injection, long-acting	0.413
AGE>70	F	p1yr	A10BA	0.138354	0.250703	0	-1	-0.632831	0.527	0	A10BA Biguanides [DG:DG01684]	0.901
AGE>70	F	p1yr	B01AC	0.00589321	-0.203988	0	1	1.6858	0.0918	0	B01AC Platelet aggregation inhibitors excl. heparin	0.413
AGE>70	F	p1yr	C07AB	-0.131826	-0.182156	0	1	0.408141	0.683	0	C07AB Beta blocking AGE>70nts, selective	0.901
AGE>70	F	p1yr	C08CA	-0.049359	-0.000765716	0	0	-0.472898	0.636	0	C08CA Dihydropyridine derivatives [DG:DG01928]	0.901
AGE>70	F	p1yr	C09AA	-0.207398	-0.0243919	1	0	-1.69479	0.0901	0	C09AA ACE inhibitors, plain [DG:DG01501]	0.413
AGE>70	F	p1yr	C09CA	-0.127584	-0.0823958	0	0	-0.337361	0.736	0	C09CA Angiotensin II receptor blockers, plain [DG:DG01495]	0.901
AGE>70	F	p1yr	C10AA	0.0955518	0.0735209	0	0	0.252514	0.801	0	C10AA HMG CoA reductase inhibitors [DG:DG01660]	0.901
AGE>70	F	p1yr	G03CA	-0.32216	-0.299981	1	1	-0.121235	0.904	0	G03CA Natural and semisynthetic estrogens, plain	0.915
AGE>70	F	p1yr	G04CB	-0.256513	-0.608752	0	1	1.10799	0.268	0	G04CB Testosterone-5-alpha reductase inhibitors	0.689
AGE>70	F	p1yr	H03AA	-0.0156372	-0.0923285	0	0	0.588705	0.556	0	H03AA Thyroid hormones	0.901
AGE>70	F	p1yr	J07AL	-0.54626	-0.749813	0	1	0.37557	0.707	0	J07AL Pneumococcal vaccines	0.901
AGE>70	F	p1yr	J07AP	0.0646527	-0.655146	0	0	1.36391	0.173	0	J07AP Typhoid vaccines	0.54
AGE>70	F	p1yr	J07BB	-0.569358	-0.393635	1	1	-1.3405	0.18	0	J07BB Influenza vaccines	0.54
AGE>70	F	p1yr	J07CA	-0.409659	-0.459703	0	1	0.107031	0.915	0	J07CA Bacterial and viral vaccines, combined	0.915
AGE>70	F	p1yr	R03BA	0.182844	-0.157123	0	0	1.83424	0.0666	0	R03BA Glucocorticoids	0.413
AGE>70	G	p1yr	A02BC	-0.173848	-0.0141273	0	0	-1.22805	0.219	0	A02BC Proton pump inhibitors [DG:DG01646]	0.954
AGE>70	G	p1yr	A03AA	0.0912085	-0.127135	0	0	0.450915	0.652	0	A03AA Synthetic anticholinergics, esters with tertiary amino group	0.954
AGE>70	G	p1yr	A10AE	0.108031	-0.383334	0	0	0.867485	0.386	0	A10AE Insulins and analogues for injection, long-acting	0.954
AGE>70	G	p1yr	A10BA	0.00963777	0.430977	0	-1	-1.61808	0.106	0	A10BA Biguanides [DG:DG01684]	0.72
AGE>70	G	p1yr	B01AC	0.0793423	-0.255036	0	0	1.62264	0.105	0	B01AC Platelet aggregation inhibitors excl. heparin	0.72
AGE>70	G	p1yr	C07AB	0.029081	-0.00755807	0	0	0.18958	0.85	0	C07AB Beta blocking AGE>70nts, selective	0.958
AGE>70	G	p1yr	C08CA	-0.0486588	0.034152	0	0	-0.498946	0.618	0	C08CA Dihydropyridine derivatives [DG:DG01928]	0.954
AGE>70	G	p1yr	C09AA	-0.311241	-0.038349	1	0	-1.55525	0.12	0	C09AA ACE inhibitors, plain [DG:DG01501]	0.72
AGE>70	G	p1yr	C09CA	-0.141826	-0.171864	0	0	0.138249	0.89	0	C09CA Angiotensin II receptor blockers, plain [DG:DG01495]	0.958
AGE>70	G	p1yr	C10AA	-0.148356	-0.0568504	0	0	-0.6214	0.534	0	C10AA HMG CoA reductase inhibitors [DG:DG01660]	0.954
AGE>70	G	p1yr	G03CA	-0.285274	-0.173685	0	0	-0.35829	0.72	0	G03CA Natural and semisynthetic estrogens, plain	0.954
AGE>70	G	p1yr	G04CB	-0.289681	-0.316406	0	0	0.0529407	0.958	0	G04CB Testosterone-5-alpha reductase inhibitors	0.958
AGE>70	G	p1yr	H03AA	-0.063347	0.0621915	0	0	-0.593963	0.553	0	H03AA Thyroid hormones	0.954
AGE>70	G	p1yr	J07AL	-0.71237	-0.785243	0	0	0.0738384	0.941	0	J07AL Pneumococcal vaccines	0.958
AGE>70	G	p1yr	J07AP	-0.532008	-0.199326	0	0	-0.328854	0.742	0	J07AP Typhoid vaccines	0.954
AGE>70	G	p1yr	J07BB	-0.524275	-0.329743	1	0	-0.880856	0.378	0	J07BB Influenza vaccines	0.954
AGE>70	G	p1yr	J07CA	-1.18463	-0.564344	0	0	-0.594562	0.552	0	J07CA Bacterial and viral vaccines, combined	0.954
AGE>70	G	p1yr	R03BA	-0.152014	-0.307633	0	0	0.467712	0.64	0	R03BA Glucocorticoids	0.954
AGE>70	H	p1yr	A02BC	-0.534735	-0.0731405	1	0	-0.8753	0.381	0	A02BC Proton pump inhibitors [DG:DG01646]	1
AGE>70	H	p1yr	A03AA	-13.4913	-15.298	0	0	0.000889283	0.999	0	A03AA Synthetic anticholinergics, esters with tertiary amino group	1
AGE>70	H	p1yr	A10AE	0.364969	0.797852	0	0	-0.249977	0.803	0	A10AE Insulins and analogues for injection, long-acting	1
AGE>70	H	p1yr	A10BA	-0.277159	-0.73232	0	0	0.375437	0.707	0	A10BA Biguanides [DG:DG01684]	1
AGE>70	H	p1yr	B01AC	-0.34702	-0.148529	0	0	-0.233986	0.815	0	B01AC Platelet aggregation inhibitors excl. heparin	1
AGE>70	H	p1yr	C07AB	-0.135893	0.885405	0	0	-1.65948	0.097	0	C07AB Beta blocking AGE>70nts, selective	1
AGE>70	H	p1yr	C08CA	-0.453691	0.33697	0	0	-1.33892	0.181	0	C08CA Dihydropyridine derivatives [DG:DG01928]	1
AGE>70	H	p1yr	C09AA	-0.476683	-0.763686	0	0	0.37742	0.706	0	C09AA ACE inhibitors, plain [DG:DG01501]	1
AGE>70	H	p1yr	C09CA	-0.262194	-0.303773	0	0	0.0502885	0.96	0	C09CA Angiotensin II receptor blockers, plain [DG:DG01495]	1
AGE>70	H	p1yr	C10AA	-0.619346	0.236303	1	0	-1.55372	0.12	0	C10AA HMG CoA reductase inhibitors [DG:DG01660]	1
AGE>70	H	p1yr	G03CA	-1.03286	-15.7566	0	0	0.0107175	0.991	0	G03CA Natural and semisynthetic estrogens, plain	1
AGE>70	H	p1yr	G04CB	-0.423956	-15.7211	0	0	0.00649336	0.995	0	G04CB Testosterone-5-alpha reductase inhibitors	1
AGE>70	H	p1yr	H03AA	0.0809038	0.508756	0	0	-0.579725	0.562	0	H03AA Thyroid hormones	1
AGE>70	H	p1yr	J07AL	-13.38	-15.4022	0	0	0.000874419	0.999	0	J07AL Pneumococcal vaccines	1
AGE>70	H	p1yr	J07AP	-13.4812	-15.0838	0	0	0.000498485	1	0	J07AP Typhoid vaccines	1
AGE>70	H	p1yr	J07BB	-1.59646	-0.741347	1	0	-0.850374	0.395	0	J07BB Influenza vaccines	1
AGE>70	H	p1yr	J07CA	-13.375	-14.9152	0	0	0.00066036	0.999	0	J07CA Bacterial and viral vaccines, combined	1
AGE>70	H	p1yr	R03BA	-1.00697	-15.3282	0	0	0.0129965	0.99	0	R03BA Glucocorticoids	1
Asthma	A	p1yr	A02BC	0.37388	0.0174503	0	0	1.50577	0.132	0	A02BC Proton pump inhibitors [DG:DG01646]	0.605
Asthma	A	p1yr	A03AA	0.0882262	0.224203	0	0	-0.164973	0.869	0	A03AA Synthetic anticholinergics, esters with tertiary amino group	0.97
Asthma	A	p1yr	A10AE	-0.682128	0.825024	0	0	-1.44725	0.148	0	A10AE Insulins and analogues for injection, long-acting	0.605
Asthma	A	p1yr	A10BA	-0.855736	0.191637	0	0	-2.15148	0.0314	1	A10BA Biguanides [DG:DG01684]	0.565
Asthma	A	p1yr	B01AC	0.180344	0.0353963	0	0	0.396841	0.691	0	B01AC Platelet aggregation inhibitors excl. heparin	0.888
Asthma	A	p1yr	C07AB	0.0357562	0.282924	0	-1	-0.66493	0.506	0	C07AB Beta blocking AGE>70nts, selective	0.759
Asthma	A	p1yr	C08CA	0.316969	-0.0480112	0	0	1.25148	0.211	0	C08CA Dihydropyridine derivatives [DG:DG01928]	0.605
Asthma	A	p1yr	C09AA	-0.130413	-0.164288	0	0	0.105286	0.916	0	C09AA ACE inhibitors, plain [DG:DG01501]	0.97
Asthma	A	p1yr	C09CA	-0.30008	-0.0571606	0	0	-0.66536	0.506	0	C09CA Angiotensin II receptor blockers, plain [DG:DG01495]	0.759
Asthma	A	p1yr	C10AA	-0.228389	-0.338664	0	1	0.417059	0.677	0	C10AA HMG CoA reductase inhibitors [DG:DG01660]	0.888
Asthma	A	p1yr	G03CA	0.637695	0.076246	0	0	1.29582	0.195	0	G03CA Natural and semisynthetic estrogens, plain	0.605
Asthma	A	p1yr	G04CB	-0.406301	0.21279	0	0	-0.72297	0.47	0	G04CB Testosterone-5-alpha reductase inhibitors	0.759
Asthma	A	p1yr	H03AA	-0.288465	0.161994	0	0	-1.22759	0.22	0	H03AA Thyroid hormones	0.605
Asthma	A	p1yr	J07AL	0.40958	-0.892979	0	0	1.10504	0.269	0	J07AL Pneumococcal vaccines	0.605
Asthma	A	p1yr	J07AP	12.1948	-0.131377	0	0	0.0269019	0.979	0	J07AP Typhoid vaccines	0.979
Asthma	A	p1yr	J07BB	0.291215	0.0175271	0	0	0.70766	0.479	0	J07BB Influenza vaccines	0.759
Asthma	A	p1yr	J07CA	-0.827157	-0.47665	0	0	-0.226579	0.821	0	J07CA Bacterial and viral vaccines, combined	0.97
Asthma	A	p1yr	R03BA	-0.269818	-0.768429	0	1	1.11517	0.265	0	R03BA Glucocorticoids	0.605
Asthma	B	p1yr	A02BC	-0.149828	-0.326058	0	0	0.245034	0.806	0	A02BC Proton pump inhibitors [DG:DG01646]	1
Asthma	B	p1yr	A03AA	-15.7968	-14.0801	0	0	-0.000557134	1	0	A03AA Synthetic anticholinergics, esters with tertiary amino group	1
Asthma	B	p1yr	A10AE	0.708743	0.441437	0	0	0.136764	0.891	0	A10AE Insulins and analogues for injection, long-acting	1
Asthma	B	p1yr	A10BA	-1.35157	-0.159093	0	0	-0.842653	0.399	0	A10BA Biguanides [DG:DG01684]	1
Asthma	B	p1yr	B01AC	-1.20514	-0.49899	0	0	-0.599074	0.549	0	B01AC Platelet aggregation inhibitors excl. heparin	1
Asthma	B	p1yr	C07AB	-0.45596	0.139819	0	0	-0.55931	0.576	0	C07AB Beta blocking AGE>70nts, selective	1
Asthma	B	p1yr	C08CA	-1.23158	-0.181884	0	0	-1.00131	0.317	0	C08CA Dihydropyridine derivatives [DG:DG01928]	1
Asthma	B	p1yr	C09AA	-1.40968	-0.177643	0	0	-0.914658	0.36	0	C09AA ACE inhibitors, plain [DG:DG01501]	1
Asthma	B	p1yr	C09CA	-2.24345	-0.0751425	0	0	-1.17863	0.239	0	C09CA Angiotensin II receptor blockers, plain [DG:DG01495]	1
Asthma	B	p1yr	C10AA	-2.29171	-0.396964	1	0	-1.92805	0.0538	0	C10AA HMG CoA reductase inhibitors [DG:DG01660]	0.663
Asthma	B	p1yr	G03CA	-16.8914	-0.925993	0	0	-0.00640343	0.995	0	G03CA Natural and semisynthetic estrogens, plain	1
Asthma	B	p1yr	G04CB	-16.6556	-0.424757	0	0	-0.0049457	0.996	0	G04CB Testosterone-5-alpha reductase inhibitors	1
Asthma	B	p1yr	H03AA	1.46489	0.00734822	-1	0	1.78849	0.0737	0	H03AA Thyroid hormones	0.663
Asthma	B	p1yr	J07AL	-14.9034	-13.9361	0	0	-0.000205632	1	0	J07AL Pneumococcal vaccines	1
Asthma	B	p1yr	J07AP	0.173165	-13.349	0	0	0.000877692	0.999	0	J07AP Typhoid vaccines	1
Asthma	B	p1yr	J07BB	-16.783	-0.892314	0	1	-0.00671018	0.995	0	J07BB Influenza vaccines	1
Asthma	B	p1yr	J07CA	-14.7811	-13.4956	0	0	-0.000245806	1	0	J07CA Bacterial and viral vaccines, combined	1
Asthma	B	p1yr	R03BA	-0.739094	-15.2448	0	0	0.017899	0.986	0	R03BA Glucocorticoids	1
Asthma	C	p1yr	A02BC	0.427915	0.365175	-1	-1	0.350974	0.726	0	A02BC Proton pump inhibitors [DG:DG01646]	0.975
Asthma	C	p1yr	A03AA	-0.0980573	0.326083	0	0	-0.689064	0.491	0	A03AA Synthetic anticholinergics, esters with tertiary amino group	0.975
Asthma	C	p1yr	A10AE	0.0512941	0.0275197	0	0	0.0356794	0.972	0	A10AE Insulins and analogues for injection, long-acting	0.975
Asthma	C	p1yr	A10BA	0.0695387	0.145653	0	0	-0.227921	0.82	0	A10BA Biguanides [DG:DG01684]	0.975
Asthma	C	p1yr	B01AC	0.166333	0.235682	0	-1	-0.272482	0.785	0	B01AC Platelet aggregation inhibitors excl. heparin	0.975
Asthma	C	p1yr	C07AB	0.187213	0.287888	0	-1	-0.376117	0.707	0	C07AB Beta blocking AGE>70nts, selective	0.975
Asthma	C	p1yr	C08CA	0.299508	-0.00682409	0	0	1.43371	0.152	0	C08CA Dihydropyridine derivatives [DG:DG01928]	0.975
Asthma	C	p1yr	C09AA	-0.149454	-0.205769	0	1	0.239013	0.811	0	C09AA ACE inhibitors, plain [DG:DG01501]	0.975
Asthma	C	p1yr	C09CA	-0.0907578	-0.0562163	0	0	-0.127688	0.898	0	C09CA Angiotensin II receptor blockers, plain [DG:DG01495]	0.975
Asthma	C	p1yr	C10AA	-0.127444	-0.141168	0	0	0.0695601	0.945	0	C10AA HMG CoA reductase inhibitors [DG:DG01660]	0.975
Asthma	C	p1yr	G03CA	0.321497	0.0269297	0	0	0.894793	0.371	0	G03CA Natural and semisynthetic estrogens, plain	0.975
Asthma	C	p1yr	G04CB	-0.395768	0.197277	0	0	-0.996114	0.319	0	G04CB Testosterone-5-alpha reductase inhibitors	0.975
Asthma	C	p1yr	H03AA	-0.0879556	0.122999	0	0	-0.749988	0.453	0	H03AA Thyroid hormones	0.975
Asthma	C	p1yr	J07AL	0.513402	-1.23207	0	0	1.84641	0.0648	0	J07AL Pneumococcal vaccines	0.975
Asthma	C	p1yr	J07AP	-0.698049	-0.162181	0	0	-0.3204	0.749	0	J07AP Typhoid vaccines	0.975
Asthma	C	p1yr	J07BB	-0.368686	-0.284898	0	1	-0.302556	0.762	0	J07BB Influenza vaccines	0.975
Asthma	C	p1yr	J07CA	-0.809733	-0.847001	0	0	0.0310225	0.975	0	J07CA Bacterial and viral vaccines, combined	0.975
Asthma	C	p1yr	R03BA	-0.0707261	-0.271144	0	0	0.540931	0.589	0	R03BA Glucocorticoids	0.975
Asthma	D	p1yr	A02BC	0.186889	-0.113712	0	0	0.455292	0.649	0	A02BC Proton pump inhibitors [DG:DG01646]	1
Asthma	D	p1yr	A03AA	-15.1986	-13.5706	0	0	-0.00067671	0.999	0	A03AA Synthetic anticholinergics, esters with tertiary amino group	1
Asthma	D	p1yr	A10AE	1.02358	0.437602	0	0	0.34948	0.727	0	A10AE Insulins and analogues for injection, long-acting	1
Asthma	D	p1yr	A10BA	-0.969432	-0.286604	0	0	-0.504658	0.614	0	A10BA Biguanides [DG:DG01684]	1
Asthma	D	p1yr	B01AC	-0.790313	-0.209237	0	0	-0.551318	0.581	0	B01AC Platelet aggregation inhibitors excl. heparin	1
Asthma	D	p1yr	C07AB	0.128453	0.16961	0	0	-0.0436365	0.965	0	C07AB Beta blocking AGE>70nts, selective	1
Asthma	D	p1yr	C08CA	-0.80231	-0.322285	0	0	-0.491653	0.623	0	C08CA Dihydropyridine derivatives [DG:DG01928]	1
Asthma	D	p1yr	C09AA	-1.47502	-0.459074	0	0	-0.800941	0.423	0	C09AA ACE inhibitors, plain [DG:DG01501]	1
Asthma	D	p1yr	C09CA	-1.73745	-0.147193	0	0	-0.928944	0.353	0	C09CA Angiotensin II receptor blockers, plain [DG:DG01495]	1
Asthma	D	p1yr	C10AA	-1.73445	-0.49185	1	1	-1.50185	0.133	0	C10AA HMG CoA reductase inhibitors [DG:DG01660]	1
Asthma	D	p1yr	G03CA	-14.9095	-1.00458	0	0	-0.011627	0.991	0	G03CA Natural and semisynthetic estrogens, plain	1
Asthma	D	p1yr	G04CB	-15.4594	-0.153835	0	0	-0.00735601	0.994	0	G04CB Testosterone-5-alpha reductase inhibitors	1
Asthma	D	p1yr	H03AA	1.45438	-0.0328879	-1	0	2.01225	0.0442	-1	H03AA Thyroid hormones	0.796
Asthma	D	p1yr	J07AL	-14.873	-13.0963	0	0	-0.000474161	1	0	J07AL Pneumococcal vaccines	1
Asthma	D	p1yr	J07AP	-14.635	-13.0944	0	0	-0.000338527	1	0	J07AP Typhoid vaccines	1
Asthma	D	p1yr	J07BB	-16.2697	-1.16637	0	1	-0.0106551	0.991	0	J07BB Influenza vaccines	1
Asthma	D	p1yr	J07CA	-14.7317	-13.0875	0	0	-0.000549796	1	0	J07CA Bacterial and viral vaccines, combined	1
Asthma	D	p1yr	R03BA	-0.76825	-13.5064	0	0	0.0303617	0.976	0	R03BA Glucocorticoids	1
Asthma	E	p1yr	A02BC	0.262737	0.373292	-1	-1	-1.10413	0.27	0	A02BC Proton pump inhibitors [DG:DG01646]	0.54
Asthma	E	p1yr	A03AA	0.0284264	0.207477	0	0	-0.4965	0.62	0	A03AA Synthetic anticholinergics, esters with tertiary amino group	0.775
Asthma	E	p1yr	A10AE	0.110833	-0.458579	0	0	1.20346	0.229	0	A10AE Insulins and analogues for injection, long-acting	0.54
Asthma	E	p1yr	A10BA	0.387071	0.0952939	-1	0	1.43516	0.151	0	A10BA Biguanides [DG:DG01684]	0.54
Asthma	E	p1yr	B01AC	0.0323333	0.277535	0	-1	-1.44372	0.149	0	B01AC Platelet aggregation inhibitors excl. heparin	0.54
Asthma	E	p1yr	C07AB	0.168901	0.171428	0	-1	-0.0145446	0.988	0	C07AB Beta blocking AGE>70nts, selective	0.988
Asthma	E	p1yr	C08CA	0.174339	0.0567481	0	0	0.888915	0.374	0	C08CA Dihydropyridine derivatives [DG:DG01928]	0.673
Asthma	E	p1yr	C09AA	-0.114861	-0.0609824	0	0	-0.378901	0.705	0	C09AA ACE inhibitors, plain [DG:DG01501]	0.793
Asthma	E	p1yr	C09CA	0.111452	0.0203957	0	0	0.559148	0.576	0	C09CA Angiotensin II receptor blockers, plain [DG:DG01495]	0.775
Asthma	E	p1yr	C10AA	-0.0362007	0.113844	0	-1	-1.29546	0.195	0	C10AA HMG CoA reductase inhibitors [DG:DG01660]	0.54
Asthma	E	p1yr	G03CA	-0.0329794	0.0063936	0	0	-0.210323	0.833	0	G03CA Natural and semisynthetic estrogens, plain	0.882
Asthma	E	p1yr	G04CB	-0.234588	0.0847959	0	0	-0.815988	0.415	0	G04CB Testosterone-5-alpha reductase inhibitors	0.679
Asthma	E	p1yr	H03AA	0.134399	0.0246995	0	0	0.708759	0.478	0	H03AA Thyroid hormones	0.717
Asthma	E	p1yr	J07AL	0.236805	-0.796757	0	1	1.96448	0.0495	-1	J07AL Pneumococcal vaccines	0.54
Asthma	E	p1yr	J07AP	-1.96758	-0.112635	0	0	-1.14527	0.252	0	J07AP Typhoid vaccines	0.54
Asthma	E	p1yr	J07BB	-0.542548	-0.264822	1	1	-1.59709	0.11	0	J07BB Influenza vaccines	0.54
Asthma	E	p1yr	J07CA	-0.720026	-0.451172	0	1	-0.459624	0.646	0	J07CA Bacterial and viral vaccines, combined	0.775
Asthma	E	p1yr	R03BA	0.0275393	0.238758	0	0	-1.22267	0.221	0	R03BA Glucocorticoids	0.54
Asthma	F	p1yr	A02BC	-0.236011	-0.16105	1	1	-0.699943	0.484	0	A02BC Proton pump inhibitors [DG:DG01646]	0.692
Asthma	F	p1yr	A03AA	-0.407351	-0.119393	0	0	-0.754326	0.451	0	A03AA Synthetic anticholinergics, esters with tertiary amino group	0.692
Asthma	F	p1yr	A10AE	-0.213133	-0.656571	0	1	0.874122	0.382	0	A10AE Insulins and analogues for injection, long-acting	0.692
Asthma	F	p1yr	A10BA	0.416301	0.124634	-1	0	1.27695	0.202	0	A10BA Biguanides [DG:DG01684]	0.692
Asthma	F	p1yr	B01AC	-0.204905	-0.0502966	0	0	-0.88159	0.378	0	B01AC Platelet aggregation inhibitors excl. heparin	0.692
Asthma	F	p1yr	C07AB	-0.144722	-0.160063	0	1	0.0856475	0.932	0	C07AB Beta blocking AGE>70nts, selective	0.95
Asthma	F	p1yr	C08CA	0.0617997	-0.0514153	0	0	0.802485	0.422	0	C08CA Dihydropyridine derivatives [DG:DG01928]	0.692
Asthma	F	p1yr	C09AA	-0.125006	-0.112616	0	0	-0.0820312	0.935	0	C09AA ACE inhibitors, plain [DG:DG01501]	0.95
Asthma	F	p1yr	C09CA	0.075576	-0.140959	0	0	1.24232	0.214	0	C09CA Angiotensin II receptor blockers, plain [DG:DG01495]	0.692
Asthma	F	p1yr	C10AA	-0.0175943	0.0800796	0	0	-0.792322	0.428	0	C10AA HMG CoA reductase inhibitors [DG:DG01660]	0.692
Asthma	F	p1yr	G03CA	-0.225505	-0.30851	0	1	0.413726	0.679	0	G03CA Natural and semisynthetic estrogens, plain	0.832
Asthma	F	p1yr	G04CB	-0.66001	-0.222383	0	0	-1.07861	0.281	0	G04CB Testosterone-5-alpha reductase inhibitors	0.692
Asthma	F	p1yr	H03AA	0.0189789	-0.0932546	0	0	0.674179	0.5	0	H03AA Thyroid hormones	0.692
Asthma	F	p1yr	J07AL	0.289851	-0.989953	0	1	2.26109	0.0238	-1	J07AL Pneumococcal vaccines	0.428
Asthma	F	p1yr	J07AP	-1.8358	-0.328127	0	0	-0.916888	0.359	0	J07AP Typhoid vaccines	0.692
Asthma	F	p1yr	J07BB	-0.714777	-0.477493	1	1	-1.30539	0.192	0	J07BB Influenza vaccines	0.692
Asthma	F	p1yr	J07CA	-0.487652	-0.448981	0	1	-0.0627416	0.95	0	J07CA Bacterial and viral vaccines, combined	0.95
Asthma	F	p1yr	R03BA	-0.0324273	-0.106195	0	0	0.3944	0.693	0	R03BA Glucocorticoids	0.832
Asthma	G	p1yr	A02BC	-0.00683158	-0.137671	0	0	0.72359	0.469	0	A02BC Proton pump inhibitors [DG:DG01646]	0.957
Asthma	G	p1yr	A03AA	-0.379663	0.0476276	0	0	-0.682313	0.495	0	A03AA Synthetic anticholinergics, esters with tertiary amino group	0.957
Asthma	G	p1yr	A10AE	-0.309702	-0.173556	0	0	-0.19737	0.844	0	A10AE Insulins and analogues for injection, long-acting	0.957
Asthma	G	p1yr	A10BA	0.0914945	0.18925	0	0	-0.282697	0.777	0	A10BA Biguanides [DG:DG01684]	0.957
Asthma	G	p1yr	B01AC	-0.056011	-0.0220971	0	0	-0.133167	0.894	0	B01AC Platelet aggregation inhibitors excl. heparin	0.957
Asthma	G	p1yr	C07AB	-0.0653875	0.0161799	0	0	-0.304396	0.761	0	C07AB Beta blocking AGE>70nts, selective	0.957
Asthma	G	p1yr	C08CA	0.22959	-0.0853463	0	0	1.4469	0.148	0	C08CA Dihydropyridine derivatives [DG:DG01928]	0.868
Asthma	G	p1yr	C09AA	-0.12651	-0.215112	0	1	0.370362	0.711	0	C09AA ACE inhibitors, plain [DG:DG01501]	0.957
Asthma	G	p1yr	C09CA	-0.106749	-0.161203	0	0	0.196174	0.844	0	C09CA Angiotensin II receptor blockers, plain [DG:DG01495]	0.957
Asthma	G	p1yr	C10AA	-0.106912	-0.135596	0	0	0.143352	0.886	0	C10AA HMG CoA reductase inhibitors [DG:DG01660]	0.957
Asthma	G	p1yr	G03CA	0.155825	-0.245936	0	0	1.19195	0.233	0	G03CA Natural and semisynthetic estrogens, plain	0.868
Asthma	G	p1yr	G04CB	-0.799414	-0.0756552	0	0	-1.19595	0.232	0	G04CB Testosterone-5-alpha reductase inhibitors	0.868
Asthma	G	p1yr	H03AA	-0.171448	0.021426	0	0	-0.673116	0.501	0	H03AA Thyroid hormones	0.957
Asthma	G	p1yr	J07AL	0.521937	-1.38723	0	1	1.96991	0.0488	-1	J07AL Pneumococcal vaccines	0.868
Asthma	G	p1yr	J07AP	-0.613512	-0.319122	0	0	-0.173557	0.862	0	J07AP Typhoid vaccines	0.957
Asthma	G	p1yr	J07BB	-0.491232	-0.477036	0	1	-0.0503845	0.96	0	J07BB Influenza vaccines	0.96
Asthma	G	p1yr	J07CA	-0.646942	-0.793857	0	0	0.120479	0.904	0	J07CA Bacterial and viral vaccines, combined	0.957
Asthma	G	p1yr	R03BA	-0.102877	-0.54577	0	0	1.17264	0.241	0	R03BA Glucocorticoids	0.868
Asthma	H	p1yr	A02BC	-0.146671	-0.493141	0	1	0.52998	0.596	0	A02BC Proton pump inhibitors [DG:DG01646]	1
Asthma	H	p1yr	A03AA	-15.641	-14.2077	0	0	-0.000527056	1	0	A03AA Synthetic anticholinergics, esters with tertiary amino group	1
Asthma	H	p1yr	A10AE	0.703358	0.2907	0	0	0.240462	0.81	0	A10AE Insulins and analogues for injection, long-acting	1
Asthma	H	p1yr	A10BA	-0.847149	-0.293444	0	0	-0.404846	0.686	0	A10BA Biguanides [DG:DG01684]	1
Asthma	H	p1yr	B01AC	-0.923603	-0.306774	0	0	-0.592049	0.554	0	B01AC Platelet aggregation inhibitors excl. heparin	1
Asthma	H	p1yr	C07AB	-0.174874	-0.0179243	0	0	-0.166262	0.868	0	C07AB Beta blocking AGE>70nts, selective	1
Asthma	H	p1yr	C08CA	-0.922513	-0.287353	0	0	-0.645142	0.519	0	C08CA Dihydropyridine derivatives [DG:DG01928]	1
Asthma	H	p1yr	C09AA	-1.56319	-0.466735	0	0	-0.859302	0.39	0	C09AA ACE inhibitors, plain [DG:DG01501]	1
Asthma	H	p1yr	C09CA	-1.67954	-0.182183	0	0	-0.873972	0.382	0	C09CA Angiotensin II receptor blockers, plain [DG:DG01495]	1
Asthma	H	p1yr	C10AA	-1.70842	-0.406528	1	0	-1.56377	0.118	0	C10AA HMG CoA reductase inhibitors [DG:DG01660]	1
Asthma	H	p1yr	G03CA	-15.5411	-1.15939	0	0	-0.00949065	0.992	0	G03CA Natural and semisynthetic estrogens, plain	1
Asthma	H	p1yr	G04CB	-16.0767	-0.39103	0	0	-0.0068641	0.995	0	G04CB Testosterone-5-alpha reductase inhibitors	1
Asthma	H	p1yr	H03AA	1.50129	-0.0961057	-1	0	2.15014	0.0315	-1	H03AA Thyroid hormones	0.567
Asthma	H	p1yr	J07AL	-14.9193	-13.8717	0	0	-0.000277342	1	0	J07AL Pneumococcal vaccines	1
Asthma	H	p1yr	J07AP	-14.6146	-12.9792	0	0	-0.000370688	1	0	J07AP Typhoid vaccines	1
Asthma	H	p1yr	J07BB	-16.8673	-1.36849	0	1	-0.00843095	0.993	0	J07BB Influenza vaccines	1
Asthma	H	p1yr	J07CA	-14.4561	-13.7725	0	0	-0.000201965	1	0	J07CA Bacterial and viral vaccines, combined	1
Asthma	H	p1yr	R03BA	-0.820873	-14.18	0	0	0.0259203	0.979	0	R03BA Glucocorticoids	1
BMI>30	A	p1yr	A02BC	-0.0748777	0.104447	0	0	-1.0177	0.309	0	A02BC Proton pump inhibitors [DG:DG01646]	0.98
BMI>30	A	p1yr	A03AA	0.282874	0.20199	0	0	0.12741	0.899	0	A03AA Synthetic anticholinergics, esters with tertiary amino group	0.98
BMI>30	A	p1yr	A10AE	0.280036	0.673459	0	0	-0.428488	0.668	0	A10AE Insulins and analogues for injection, long-acting	0.98
BMI>30	A	p1yr	A10BA	-0.0945975	0.0247628	0	0	-0.338939	0.735	0	A10BA Biguanides [DG:DG01684]	0.98
BMI>30	A	p1yr	B01AC	-0.257912	0.22494	0	0	-1.81905	0.0689	0	B01AC Platelet aggregation inhibitors excl. heparin	0.624
BMI>30	A	p1yr	C07AB	0.131698	0.355173	0	-1	-0.876587	0.381	0	C07AB Beta blocking AGE>70nts, selective	0.98
BMI>30	A	p1yr	C08CA	0.14406	-0.089412	0	0	1.09094	0.275	0	C08CA Dihydropyridine derivatives [DG:DG01928]	0.98
BMI>30	A	p1yr	C09AA	-0.0855417	-0.204984	0	0	0.526614	0.598	0	C09AA ACE inhibitors, plain [DG:DG01501]	0.98
BMI>30	A	p1yr	C09CA	-0.0922658	-0.112145	0	0	0.0714955	0.943	0	C09CA Angiotensin II receptor blockers, plain [DG:DG01495]	0.98
BMI>30	A	p1yr	C10AA	-0.533234	-0.214034	1	1	-1.62712	0.104	0	C10AA HMG CoA reductase inhibitors [DG:DG01660]	0.624
BMI>30	A	p1yr	G03CA	-0.537173	0.313256	0	0	-1.75704	0.0789	0	G03CA Natural and semisynthetic estrogens, plain	0.624
BMI>30	A	p1yr	G04CB	-0.127326	0.246186	0	0	-0.663444	0.507	0	G04CB Testosterone-5-alpha reductase inhibitors	0.98
BMI>30	A	p1yr	H03AA	0.0643888	0.0926932	0	0	-0.0994461	0.921	0	H03AA Thyroid hormones	0.98
BMI>30	A	p1yr	J07AL	-0.967124	0.0219219	0	0	-0.859651	0.39	0	J07AL Pneumococcal vaccines	0.98
BMI>30	A	p1yr	J07AP	-13.6584	0.25794	0	0	-0.025595	0.98	0	J07AP Typhoid vaccines	0.98
BMI>30	A	p1yr	J07BB	0.0562511	0.0041611	0	0	0.181659	0.856	0	J07BB Influenza vaccines	0.98
BMI>30	A	p1yr	J07CA	-0.924371	-0.301288	0	0	-0.532743	0.594	0	J07CA Bacterial and viral vaccines, combined	0.98
BMI>30	A	p1yr	R03BA	-0.526871	-0.475015	0	0	-0.1208	0.904	0	R03BA Glucocorticoids	0.98
BMI>30	B	p1yr	A02BC	0.0388354	-0.675536	0	1	1.64396	0.1	0	A02BC Proton pump inhibitors [DG:DG01646]	0.939
BMI>30	B	p1yr	A03AA	-15.1094	-14.8688	0	0	-0.000146883	1	0	A03AA Synthetic anticholinergics, esters with tertiary amino group	1
BMI>30	B	p1yr	A10AE	0.0935037	1.01662	0	0	-0.605149	0.545	0	A10AE Insulins and analogues for injection, long-acting	1
BMI>30	B	p1yr	A10BA	-0.282883	-0.620087	0	0	0.383306	0.701	0	A10BA Biguanides [DG:DG01684]	1
BMI>30	B	p1yr	B01AC	-0.940599	-0.309701	0	0	-1.06863	0.285	0	B01AC Platelet aggregation inhibitors excl. heparin	0.939
BMI>30	B	p1yr	C07AB	0.143505	0.196306	0	0	-0.103448	0.918	0	C07AB Beta blocking AGE>70nts, selective	1
BMI>30	B	p1yr	C08CA	0.146188	-0.367307	0	0	1.02767	0.304	0	C08CA Dihydropyridine derivatives [DG:DG01928]	0.939
BMI>30	B	p1yr	C09AA	-0.364724	-0.190016	0	0	-0.32979	0.742	0	C09AA ACE inhibitors, plain [DG:DG01501]	1
BMI>30	B	p1yr	C09CA	-0.00877556	-0.24872	0	0	0.395229	0.693	0	C09CA Angiotensin II receptor blockers, plain [DG:DG01495]	1
BMI>30	B	p1yr	C10AA	-0.401716	-0.573145	0	1	0.38684	0.699	0	C10AA HMG CoA reductase inhibitors [DG:DG01660]	1
BMI>30	B	p1yr	G03CA	-15.0014	-0.61829	0	0	-0.0150878	0.988	0	G03CA Natural and semisynthetic estrogens, plain	1
BMI>30	B	p1yr	G04CB	-3.35017	0.223482	0	0	-1.46623	0.143	0	G04CB Testosterone-5-alpha reductase inhibitors	0.939
BMI>30	B	p1yr	H03AA	0.656576	-0.0213561	0	0	1.00937	0.313	0	H03AA Thyroid hormones	0.939
BMI>30	B	p1yr	J07AL	-13.9226	-13.4333	0	0	-0.000278657	1	0	J07AL Pneumococcal vaccines	1
BMI>30	B	p1yr	J07AP	-13.2552	-13.1599	0	0	-3.57774e-05	1	0	J07AP Typhoid vaccines	1
BMI>30	B	p1yr	J07BB	-1.58422	-0.61602	1	0	-1.01374	0.311	0	J07BB Influenza vaccines	0.939
BMI>30	B	p1yr	J07CA	-14.0207	-13.1902	0	0	-0.000581317	1	0	J07CA Bacterial and viral vaccines, combined	1
BMI>30	B	p1yr	R03BA	-0.542747	-15.9009	0	0	0.0176171	0.986	0	R03BA Glucocorticoids	1
BMI>30	C	p1yr	A02BC	0.304278	0.404628	-1	-1	-0.72854	0.466	0	A02BC Proton pump inhibitors [DG:DG01646]	0.932
BMI>30	C	p1yr	A03AA	0.500818	0.0788075	0	0	0.89043	0.373	0	A03AA Synthetic anticholinergics, esters with tertiary amino group	0.932
BMI>30	C	p1yr	A10AE	0.0764484	0.0554594	0	0	0.0385995	0.969	0	A10AE Insulins and analogues for injection, long-acting	0.969
BMI>30	C	p1yr	A10BA	0.0225459	0.243459	0	0	-0.856013	0.392	0	A10BA Biguanides [DG:DG01684]	0.932
BMI>30	C	p1yr	B01AC	0.0621668	0.308797	0	-1	-1.26	0.208	0	B01AC Platelet aggregation inhibitors excl. heparin	0.932
BMI>30	C	p1yr	C07AB	0.201955	0.308775	0	-1	-0.561114	0.575	0	C07AB Beta blocking AGE>70nts, selective	0.935
BMI>30	C	p1yr	C08CA	0.11618	-0.0176492	0	0	0.816082	0.414	0	C08CA Dihydropyridine derivatives [DG:DG01928]	0.932
BMI>30	C	p1yr	C09AA	-0.16012	-0.234347	0	1	0.425365	0.671	0	C09AA ACE inhibitors, plain [DG:DG01501]	0.935
BMI>30	C	p1yr	C09CA	-0.115452	-0.0287811	0	0	-0.415266	0.678	0	C09CA Angiotensin II receptor blockers, plain [DG:DG01495]	0.935
BMI>30	C	p1yr	C10AA	-0.327851	-0.062785	1	0	-1.75938	0.0785	0	C10AA HMG CoA reductase inhibitors [DG:DG01660]	0.932
BMI>30	C	p1yr	G03CA	-0.462692	0.19227	0	0	-1.58574	0.113	0	G03CA Natural and semisynthetic estrogens, plain	0.932
BMI>30	C	p1yr	G04CB	-0.0863231	0.217036	0	0	-0.795708	0.426	0	G04CB Testosterone-5-alpha reductase inhibitors	0.932
BMI>30	C	p1yr	H03AA	0.0426511	0.108075	0	0	-0.300231	0.764	0	H03AA Thyroid hormones	0.935
BMI>30	C	p1yr	J07AL	-0.571016	-0.847156	0	0	0.281247	0.779	0	J07AL Pneumococcal vaccines	0.935
BMI>30	C	p1yr	J07AP	-11.9607	0.0460588	0	0	-0.059136	0.953	0	J07AP Typhoid vaccines	0.969
BMI>30	C	p1yr	J07BB	-0.15246	-0.376781	0	1	1.03978	0.298	0	J07BB Influenza vaccines	0.932
BMI>30	C	p1yr	J07CA	-0.998431	-0.793492	0	0	-0.197708	0.843	0	J07CA Bacterial and viral vaccines, combined	0.948
BMI>30	C	p1yr	R03BA	-0.192227	-0.0755751	0	0	-0.342491	0.732	0	R03BA Glucocorticoids	0.935
BMI>30	D	p1yr	A02BC	0.34201	-0.377781	0	0	1.81533	0.0695	0	A02BC Proton pump inhibitors [DG:DG01646]	1
BMI>30	D	p1yr	A03AA	-13.756	-13.421	0	0	-0.000374614	1	0	A03AA Synthetic anticholinergics, esters with tertiary amino group	1
BMI>30	D	p1yr	A10AE	0.200755	0.997955	0	0	-0.63814	0.523	0	A10AE Insulins and analogues for injection, long-acting	1
BMI>30	D	p1yr	A10BA	-0.400023	-0.347629	0	0	-0.0670376	0.947	0	A10BA Biguanides [DG:DG01684]	1
BMI>30	D	p1yr	B01AC	-0.555709	-0.0637705	0	0	-0.934105	0.35	0	B01AC Platelet aggregation inhibitors excl. heparin	1
BMI>30	D	p1yr	C07AB	0.296003	0.10347	0	0	0.416778	0.677	0	C07AB Beta blocking AGE>70nts, selective	1
BMI>30	D	p1yr	C08CA	-0.17895	-0.497784	0	0	0.698117	0.485	0	C08CA Dihydropyridine derivatives [DG:DG01928]	1
BMI>30	D	p1yr	C09AA	-0.507782	-0.514604	0	0	0.0142766	0.989	0	C09AA ACE inhibitors, plain [DG:DG01501]	1
BMI>30	D	p1yr	C09CA	-0.191503	-0.21994	0	0	0.051875	0.959	0	C09CA Angiotensin II receptor blockers, plain [DG:DG01495]	1
BMI>30	D	p1yr	C10AA	-0.494721	-0.690799	0	1	0.484212	0.628	0	C10AA HMG CoA reductase inhibitors [DG:DG01660]	1
BMI>30	D	p1yr	G03CA	-13.3948	-0.789039	0	0	-0.0282414	0.977	0	G03CA Natural and semisynthetic estrogens, plain	1
BMI>30	D	p1yr	G04CB	-2.5515	0.172344	0	0	-1.17151	0.241	0	G04CB Testosterone-5-alpha reductase inhibitors	1
BMI>30	D	p1yr	H03AA	0.423762	0.0331235	0	0	0.658129	0.51	0	H03AA Thyroid hormones	1
BMI>30	D	p1yr	J07AL	-12.5783	-12.8711	0	0	0.00036559	1	0	J07AL Pneumococcal vaccines	1
BMI>30	D	p1yr	J07AP	-12.5944	-12.811	0	0	0.000198478	1	0	J07AP Typhoid vaccines	1
BMI>30	D	p1yr	J07BB	-1.59576	-1.14303	1	1	-0.500314	0.617	0	J07BB Influenza vaccines	1
BMI>30	D	p1yr	J07CA	-12.5738	-12.7912	0	0	0.000301103	1	0	J07CA Bacterial and viral vaccines, combined	1
BMI>30	D	p1yr	R03BA	-0.540523	-13.8038	0	0	0.0322537	0.974	0	R03BA Glucocorticoids	1
BMI>30	E	p1yr	A02BC	0.356259	0.34941	-1	-1	0.0866211	0.931	0	A02BC Proton pump inhibitors [DG:DG01646]	0.95
BMI>30	E	p1yr	A03AA	0.43857	0.0185715	-1	0	1.44476	0.149	0	A03AA Synthetic anticholinergics, esters with tertiary amino group	0.792
BMI>30	E	p1yr	A10AE	-0.163448	-0.459523	0	0	0.70077	0.483	0	A10AE Insulins and analogues for injection, long-acting	0.928
BMI>30	E	p1yr	A10BA	0.124509	0.193103	0	0	-0.420495	0.674	0	A10BA Biguanides [DG:DG01684]	0.928
BMI>30	E	p1yr	B01AC	0.229292	0.241103	-1	-1	-0.0949873	0.924	0	B01AC Platelet aggregation inhibitors excl. heparin	0.95
BMI>30	E	p1yr	C07AB	0.191188	0.155835	-1	-1	0.287856	0.773	0	C07AB Beta blocking AGE>70nts, selective	0.928
BMI>30	E	p1yr	C08CA	0.0920976	0.0568643	0	0	0.354688	0.723	0	C08CA Dihydropyridine derivatives [DG:DG01928]	0.928
BMI>30	E	p1yr	C09AA	-0.0737139	-0.0672263	0	0	-0.0626126	0.95	0	C09AA ACE inhibitors, plain [DG:DG01501]	0.95
BMI>30	E	p1yr	C09CA	-0.000143183	0.0556872	0	0	-0.438751	0.661	0	C09CA Angiotensin II receptor blockers, plain [DG:DG01495]	0.928
BMI>30	E	p1yr	C10AA	0.00402172	0.122701	0	-1	-1.35299	0.176	0	C10AA HMG CoA reductase inhibitors [DG:DG01660]	0.792
BMI>30	E	p1yr	G03CA	-0.129996	0.0263899	0	0	-0.824287	0.41	0	G03CA Natural and semisynthetic estrogens, plain	0.928
BMI>30	E	p1yr	G04CB	-0.0130265	0.0685653	0	0	-0.305334	0.76	0	G04CB Testosterone-5-alpha reductase inhibitors	0.928
BMI>30	E	p1yr	H03AA	-0.0044059	0.0671906	0	0	-0.556571	0.578	0	H03AA Thyroid hormones	0.928
BMI>30	E	p1yr	J07AL	0.0340517	-0.973409	0	1	2.12515	0.0336	-1	J07AL Pneumococcal vaccines	0.605
BMI>30	E	p1yr	J07AP	-0.639767	-0.146353	0	0	-0.694417	0.487	0	J07AP Typhoid vaccines	0.928
BMI>30	E	p1yr	J07BB	-0.148154	-0.381979	0	1	1.76942	0.0768	0	J07BB Influenza vaccines	0.691
BMI>30	E	p1yr	J07CA	-0.308401	-0.543641	0	1	0.556472	0.578	0	J07CA Bacterial and viral vaccines, combined	0.928
BMI>30	E	p1yr	R03BA	0.0573093	0.128302	0	0	-0.398782	0.69	0	R03BA Glucocorticoids	0.928
BMI>30	F	p1yr	A02BC	-0.142776	-0.191729	1	1	0.57945	0.562	0	A02BC Proton pump inhibitors [DG:DG01646]	0.778
BMI>30	F	p1yr	A03AA	0.234574	-0.38233	0	0	1.96036	0.05	-1	A03AA Synthetic anticholinergics, esters with tertiary amino group	0.3
BMI>30	F	p1yr	A10AE	-0.419649	-0.648172	0	1	0.512404	0.608	0	A10AE Insulins and analogues for injection, long-acting	0.782
BMI>30	F	p1yr	A10BA	0.133751	0.257363	0	0	-0.698777	0.485	0	A10BA Biguanides [DG:DG01684]	0.778
BMI>30	F	p1yr	B01AC	-0.0265571	-0.1027	0	0	0.591864	0.554	0	B01AC Platelet aggregation inhibitors excl. heparin	0.778
BMI>30	F	p1yr	C07AB	-0.0824621	-0.198912	0	1	0.914822	0.36	0	C07AB Beta blocking AGE>70nts, selective	0.778
BMI>30	F	p1yr	C08CA	0.0369419	-0.0742133	0	0	1.0455	0.296	0	C08CA Dihydropyridine derivatives [DG:DG01928]	0.778
BMI>30	F	p1yr	C09AA	-0.0142414	-0.173614	0	1	1.44849	0.147	0	C09AA ACE inhibitors, plain [DG:DG01501]	0.661
BMI>30	F	p1yr	C09CA	-0.110666	-0.107636	0	0	-0.0223127	0.982	0	C09CA Angiotensin II receptor blockers, plain [DG:DG01495]	0.982
BMI>30	F	p1yr	C10AA	0.015784	0.0810626	0	0	-0.698726	0.485	0	C10AA HMG CoA reductase inhibitors [DG:DG01660]	0.778
BMI>30	F	p1yr	G03CA	-0.455655	-0.26637	1	1	-0.939371	0.348	0	G03CA Natural and semisynthetic estrogens, plain	0.778
BMI>30	F	p1yr	G04CB	-0.388839	-0.220564	0	0	-0.601297	0.548	0	G04CB Testosterone-5-alpha reductase inhibitors	0.778
BMI>30	F	p1yr	H03AA	-0.0438686	-0.0825208	0	0	0.280297	0.779	0	H03AA Thyroid hormones	0.935
BMI>30	F	p1yr	J07AL	0.0360394	-1.17991	0	1	2.41833	0.0156	-1	J07AL Pneumococcal vaccines	0.14
BMI>30	F	p1yr	J07AP	-0.545566	-0.387095	0	0	-0.208697	0.835	0	J07AP Typhoid vaccines	0.939
BMI>30	F	p1yr	J07BB	-0.269867	-0.621822	1	1	2.52098	0.0117	-1	J07BB Influenza vaccines	0.14
BMI>30	F	p1yr	J07CA	-0.0609873	-0.566708	0	1	1.09658	0.273	0	J07CA Bacterial and viral vaccines, combined	0.778
BMI>30	F	p1yr	R03BA	-0.0698319	-0.0488959	0	0	-0.108649	0.913	0	R03BA Glucocorticoids	0.967
BMI>30	G	p1yr	A02BC	-0.155341	-0.109867	0	0	-0.325767	0.745	0	A02BC Proton pump inhibitors [DG:DG01646]	0.969
BMI>30	G	p1yr	A03AA	0.347239	-0.260171	0	0	1.24318	0.214	0	A03AA Synthetic anticholinergics, esters with tertiary amino group	0.711
BMI>30	G	p1yr	A10AE	-0.189469	-0.14932	0	0	-0.0716042	0.943	0	A10AE Insulins and analogues for injection, long-acting	0.969
BMI>30	G	p1yr	A10BA	0.0476724	0.329481	0	0	-1.06985	0.285	0	A10BA Biguanides [DG:DG01684]	0.733
BMI>30	G	p1yr	B01AC	-0.121559	0.0226673	0	0	-0.738593	0.46	0	B01AC Platelet aggregation inhibitors excl. heparin	0.92
BMI>30	G	p1yr	C07AB	-0.0202036	0.0158274	0	0	-0.189372	0.85	0	C07AB Beta blocking AGE>70nts, selective	0.969
BMI>30	G	p1yr	C08CA	0.0889858	-0.122758	0	0	1.2604	0.208	0	C08CA Dihydropyridine derivatives [DG:DG01928]	0.711
BMI>30	G	p1yr	C09AA	-0.0789411	-0.288194	0	1	1.18157	0.237	0	C09AA ACE inhibitors, plain [DG:DG01501]	0.711
BMI>30	G	p1yr	C09CA	-0.179952	-0.136169	0	0	-0.20504	0.838	0	C09CA Angiotensin II receptor blockers, plain [DG:DG01495]	0.969
BMI>30	G	p1yr	C10AA	-0.287014	-0.0689907	1	0	-1.43313	0.152	0	C10AA HMG CoA reductase inhibitors [DG:DG01660]	0.711
BMI>30	G	p1yr	G03CA	-0.756461	-0.0614647	0	0	-1.66141	0.0966	0	G03CA Natural and semisynthetic estrogens, plain	0.711
BMI>30	G	p1yr	G04CB	-0.418461	-0.0452497	0	0	-0.956469	0.339	0	G04CB Testosterone-5-alpha reductase inhibitors	0.763
BMI>30	G	p1yr	H03AA	0.0113457	-0.0193465	0	0	0.137801	0.89	0	H03AA Thyroid hormones	0.969
BMI>30	G	p1yr	J07AL	-0.507647	-1.03958	0	0	0.532656	0.594	0	J07AL Pneumococcal vaccines	0.969
BMI>30	G	p1yr	J07AP	-12.831	-0.153163	0	0	-0.0384807	0.969	0	J07AP Typhoid vaccines	0.969
BMI>30	G	p1yr	J07BB	-0.276317	-0.592535	0	1	1.43034	0.153	0	J07BB Influenza vaccines	0.711
BMI>30	G	p1yr	J07CA	-0.716644	-0.793911	0	0	0.0732526	0.942	0	J07CA Bacterial and viral vaccines, combined	0.969
BMI>30	G	p1yr	R03BA	-0.291824	-0.24399	0	0	-0.137426	0.891	0	R03BA Glucocorticoids	0.969
BMI>30	H	p1yr	A02BC	-0.0838198	-0.742152	0	1	1.65942	0.097	0	A02BC Proton pump inhibitors [DG:DG01646]	1
BMI>30	H	p1yr	A03AA	-13.3091	-14.0924	0	0	0.000942417	0.999	0	A03AA Synthetic anticholinergics, esters with tertiary amino group	1
BMI>30	H	p1yr	A10AE	-0.0895572	0.777068	0	0	-0.677232	0.498	0	A10AE Insulins and analogues for injection, long-acting	1
BMI>30	H	p1yr	A10BA	-0.280744	-0.313097	0	0	0.0411028	0.967	0	A10BA Biguanides [DG:DG01684]	1
BMI>30	H	p1yr	B01AC	-0.63247	-0.191311	0	0	-0.837055	0.403	0	B01AC Platelet aggregation inhibitors excl. heparin	1
BMI>30	H	p1yr	C07AB	0.129772	-0.0581481	0	0	0.404418	0.686	0	C07AB Beta blocking AGE>70nts, selective	1
BMI>30	H	p1yr	C08CA	-0.134421	-0.494722	0	0	0.779347	0.436	0	C08CA Dihydropyridine derivatives [DG:DG01928]	1
BMI>30	H	p1yr	C09AA	-0.437377	-0.540741	0	0	0.21454	0.83	0	C09AA ACE inhibitors, plain [DG:DG01501]	1
BMI>30	H	p1yr	C09CA	-0.193791	-0.336646	0	0	0.257754	0.797	0	C09CA Angiotensin II receptor blockers, plain [DG:DG01495]	1
BMI>30	H	p1yr	C10AA	-0.397332	-0.651149	0	1	0.619933	0.535	0	C10AA HMG CoA reductase inhibitors [DG:DG01660]	1
BMI>30	H	p1yr	G03CA	-14.0381	-0.987935	0	0	-0.0240201	0.981	0	G03CA Natural and semisynthetic estrogens, plain	1
BMI>30	H	p1yr	G04CB	-2.95128	0.0426358	0	0	-1.28688	0.198	0	G04CB Testosterone-5-alpha reductase inhibitors	1
BMI>30	H	p1yr	H03AA	0.429459	-0.105388	0	0	0.881024	0.378	0	H03AA Thyroid hormones	1
BMI>30	H	p1yr	J07AL	-13.3272	-13.7362	0	0	0.000365514	1	0	J07AL Pneumococcal vaccines	1
BMI>30	H	p1yr	J07AP	-13.6048	-13.6147	0	0	6.07895e-06	1	0	J07AP Typhoid vaccines	1
BMI>30	H	p1yr	J07BB	-1.73629	-1.32169	1	1	-0.455331	0.649	0	J07BB Influenza vaccines	1
BMI>30	H	p1yr	J07CA	-13.5363	-13.596	0	0	5.23662e-05	1	0	J07CA Bacterial and viral vaccines, combined	1
BMI>30	H	p1yr	R03BA	-0.636866	-14.5773	0	0	0.0253275	0.98	0	R03BA Glucocorticoids	1
CAD	A	p1yr	A02BC	-0.0985859	0.0693136	0	0	-0.574584	0.566	0	A02BC Proton pump inhibitors [DG:DG01646]	0.991
CAD	A	p1yr	A03AA	-0.952407	0.308238	0	0	-0.88751	0.375	0	A03AA Synthetic anticholinergics, esters with tertiary amino group	0.991
CAD	A	p1yr	A10AE	0.448428	0.469556	0	0	-0.0182707	0.985	0	A10AE Insulins and analogues for injection, long-acting	0.991
CAD	A	p1yr	A10BA	0.00344913	-0.00397246	0	0	0.0143154	0.989	0	A10BA Biguanides [DG:DG01684]	0.991
CAD	A	p1yr	B01AC	-0.059733	0.0993799	0	0	-0.507962	0.611	0	B01AC Platelet aggregation inhibitors excl. heparin	0.991
CAD	A	p1yr	C07AB	-0.158223	0.367575	0	-1	-1.69622	0.0898	0	C07AB Beta blocking AGE>70nts, selective	0.991
CAD	A	p1yr	C08CA	0.00849064	-0.00108963	0	0	0.0277565	0.978	0	C08CA Dihydropyridine derivatives [DG:DG01928]	0.991
CAD	A	p1yr	C09AA	-0.337339	-0.107217	0	0	-0.735854	0.462	0	C09AA ACE inhibitors, plain [DG:DG01501]	0.991
CAD	A	p1yr	C09CA	-0.315783	-0.0750158	0	0	-0.618146	0.536	0	C09CA Angiotensin II receptor blockers, plain [DG:DG01495]	0.991
CAD	A	p1yr	C10AA	-0.241472	-0.319203	0	1	0.221505	0.825	0	C10AA HMG CoA reductase inhibitors [DG:DG01660]	0.991
CAD	A	p1yr	G03CA	0.568586	0.159961	0	0	0.412741	0.68	0	G03CA Natural and semisynthetic estrogens, plain	0.991
CAD	A	p1yr	G04CB	-0.0118246	0.13587	0	0	-0.238034	0.812	0	G04CB Testosterone-5-alpha reductase inhibitors	0.991
CAD	A	p1yr	H03AA	-0.610277	0.150208	0	0	-1.51022	0.131	0	H03AA Thyroid hormones	0.991
CAD	A	p1yr	J07AL	-14.886	-0.262258	0	0	-0.0168508	0.987	0	J07AL Pneumococcal vaccines	0.991
CAD	A	p1yr	J07AP	14.0387	-0.0803027	0	0	0.0113362	0.991	0	J07AP Typhoid vaccines	0.991
CAD	A	p1yr	J07BB	0.254055	0.00351968	0	0	0.502279	0.615	0	J07BB Influenza vaccines	0.991
CAD	A	p1yr	J07CA	-1.06876	-0.446533	0	0	-0.297299	0.766	0	J07CA Bacterial and viral vaccines, combined	0.991
CAD	A	p1yr	R03BA	-0.694599	0.0569407	0	0	-0.765148	0.444	0	R03BA Glucocorticoids	0.991
CAD	B	p1yr	A02BC	-0.353661	-0.323134	0	0	-0.0588077	0.953	0	A02BC Proton pump inhibitors [DG:DG01646]	1
CAD	B	p1yr	A03AA	-13.5972	-14.9874	0	0	0.000945571	0.999	0	A03AA Synthetic anticholinergics, esters with tertiary amino group	1
CAD	B	p1yr	A10AE	1.19115	0.372883	0	0	0.514093	0.607	0	A10AE Insulins and analogues for injection, long-acting	1
CAD	B	p1yr	A10BA	-0.77292	-0.20986	0	0	-0.577519	0.564	0	A10BA Biguanides [DG:DG01684]	1
CAD	B	p1yr	B01AC	-0.290027	-0.591352	0	0	0.516185	0.606	0	B01AC Platelet aggregation inhibitors excl. heparin	1
CAD	B	p1yr	C07AB	-0.431231	0.368079	0	0	-1.44624	0.148	0	C07AB Beta blocking AGE>70nts, selective	1
CAD	B	p1yr	C08CA	-1.03515	-0.10337	0	0	-1.27356	0.203	0	C08CA Dihydropyridine derivatives [DG:DG01928]	1
CAD	B	p1yr	C09AA	-0.172704	-0.319847	0	0	0.254584	0.799	0	C09AA ACE inhibitors, plain [DG:DG01501]	1
CAD	B	p1yr	C09CA	-0.343965	-0.193654	0	0	-0.211314	0.833	0	C09CA Angiotensin II receptor blockers, plain [DG:DG01495]	1
CAD	B	p1yr	C10AA	-0.819235	-0.450505	0	0	-0.642771	0.52	0	C10AA HMG CoA reductase inhibitors [DG:DG01660]	1
CAD	B	p1yr	G03CA	-15.5302	-0.923755	0	0	-0.00931092	0.993	0	G03CA Natural and semisynthetic estrogens, plain	1
CAD	B	p1yr	G04CB	0.56186	-1.36421	0	0	1.76947	0.0768	0	G04CB Testosterone-5-alpha reductase inhibitors	1
CAD	B	p1yr	H03AA	-0.59813	0.493021	0	0	-1.12883	0.259	0	H03AA Thyroid hormones	1
CAD	B	p1yr	J07AL	-12.8598	-13.8745	0	0	0.000623732	1	0	J07AL Pneumococcal vaccines	1
CAD	B	p1yr	J07AP	-10.0735	-13.3227	0	0	0.00143025	0.999	0	J07AP Typhoid vaccines	1
CAD	B	p1yr	J07BB	-2.4522	-0.73728	0	0	-1.08498	0.278	0	J07BB Influenza vaccines	1
CAD	B	p1yr	J07CA	-10.7259	-13.4415	0	0	0.00143947	0.999	0	J07CA Bacterial and viral vaccines, combined	1
CAD	B	p1yr	R03BA	-14.7	-13.9378	0	0	-0.000555906	1	0	R03BA Glucocorticoids	1
CAD	C	p1yr	A02BC	0.140247	0.407335	0	-1	-1.34985	0.177	0	A02BC Proton pump inhibitors [DG:DG01646]	0.574
CAD	C	p1yr	A03AA	-1.20741	0.381432	0	0	-1.33637	0.181	0	A03AA Synthetic anticholinergics, esters with tertiary amino group	0.574
CAD	C	p1yr	A10AE	-0.0401302	0.0538859	0	0	-0.152114	0.879	0	A10AE Insulins and analogues for injection, long-acting	0.985
CAD	C	p1yr	A10BA	-0.221817	0.221185	0	0	-1.38106	0.167	0	A10BA Biguanides [DG:DG01684]	0.574
CAD	C	p1yr	B01AC	0.020069	0.286851	0	-1	-1.25033	0.211	0	B01AC Platelet aggregation inhibitors excl. heparin	0.574
CAD	C	p1yr	C07AB	-0.24156	0.432983	0	-1	-3.26235	0.0011	1	C07AB Beta blocking AGE>70nts, selective	0.0198
CAD	C	p1yr	C08CA	-0.120917	0.0728586	0	0	-0.851745	0.394	0	C08CA Dihydropyridine derivatives [DG:DG01928]	0.709
CAD	C	p1yr	C09AA	-0.405355	-0.151509	1	0	-1.18938	0.234	0	C09AA ACE inhibitors, plain [DG:DG01501]	0.574
CAD	C	p1yr	C09CA	-0.303181	-0.00441693	0	0	-1.13908	0.255	0	C09CA Angiotensin II receptor blockers, plain [DG:DG01495]	0.574
CAD	C	p1yr	C10AA	-0.286316	-0.127138	0	0	-0.691487	0.489	0	C10AA HMG CoA reductase inhibitors [DG:DG01660]	0.8
CAD	C	p1yr	G03CA	-0.197931	0.1053	0	0	-0.470071	0.638	0	G03CA Natural and semisynthetic estrogens, plain	0.883
CAD	C	p1yr	G04CB	0.353484	0.022955	0	0	0.853562	0.393	0	G04CB Testosterone-5-alpha reductase inhibitors	0.709
CAD	C	p1yr	H03AA	-0.410748	0.142459	0	0	-1.55784	0.119	0	H03AA Thyroid hormones	0.574
CAD	C	p1yr	J07AL	-13.1092	-0.659083	0	0	-0.0272825	0.978	0	J07AL Pneumococcal vaccines	0.985
CAD	C	p1yr	J07AP	-0.182295	-0.214105	0	0	0.0189518	0.985	0	J07AP Typhoid vaccines	0.985
CAD	C	p1yr	J07BB	-0.339669	-0.294681	0	1	-0.153135	0.878	0	J07BB Influenza vaccines	0.985
CAD	C	p1yr	J07CA	-0.918228	-0.837541	0	0	-0.048513	0.961	0	J07CA Bacterial and viral vaccines, combined	0.985
CAD	C	p1yr	R03BA	-0.410706	-0.0868046	0	0	-0.575247	0.565	0	R03BA Glucocorticoids	0.847
CAD	D	p1yr	A02BC	-0.278608	-0.0210839	0	0	-0.562862	0.574	0	A02BC Proton pump inhibitors [DG:DG01646]	1
CAD	D	p1yr	A03AA	-13.3865	-13.3556	0	0	-3.69905e-05	1	0	A03AA Synthetic anticholinergics, esters with tertiary amino group	1
CAD	D	p1yr	A10AE	0.477003	0.444206	0	0	0.0266836	0.979	0	A10AE Insulins and analogues for injection, long-acting	1
CAD	D	p1yr	A10BA	-0.920759	-0.119359	0	0	-0.945731	0.344	0	A10BA Biguanides [DG:DG01684]	1
CAD	D	p1yr	B01AC	-0.191139	-0.349378	0	0	0.308127	0.758	0	B01AC Platelet aggregation inhibitors excl. heparin	1
CAD	D	p1yr	C07AB	-0.397047	0.405755	0	0	-1.69064	0.0909	0	C07AB Beta blocking AGE>70nts, selective	0.818
CAD	D	p1yr	C08CA	-1.10548	-0.174536	0	0	-1.44241	0.149	0	C08CA Dihydropyridine derivatives [DG:DG01928]	0.894
CAD	D	p1yr	C09AA	-0.46909	-0.55278	0	0	0.162949	0.871	0	C09AA ACE inhibitors, plain [DG:DG01501]	1
CAD	D	p1yr	C09CA	-0.400423	-0.176931	0	0	-0.361237	0.718	0	C09CA Angiotensin II receptor blockers, plain [DG:DG01495]	1
CAD	D	p1yr	C10AA	-0.960135	-0.511133	1	1	-0.939087	0.348	0	C10AA HMG CoA reductase inhibitors [DG:DG01660]	1
CAD	D	p1yr	G03CA	-14.3238	-0.95601	0	0	-0.0150643	0.988	0	G03CA Natural and semisynthetic estrogens, plain	1
CAD	D	p1yr	G04CB	0.945498	-1.23242	0	0	2.26905	0.0233	-1	G04CB Testosterone-5-alpha reductase inhibitors	0.419
CAD	D	p1yr	H03AA	-0.622444	0.384515	0	0	-1.16962	0.242	0	H03AA Thyroid hormones	1
CAD	D	p1yr	J07AL	-13.061	-12.9541	0	0	-8.69515e-05	1	0	J07AL Pneumococcal vaccines	1
CAD	D	p1yr	J07AP	-11.7773	-12.9404	0	0	0.000999134	0.999	0	J07AP Typhoid vaccines	1
CAD	D	p1yr	J07BB	-2.36395	-1.09709	0	1	-0.845174	0.398	0	J07BB Influenza vaccines	1
CAD	D	p1yr	J07CA	-13.1264	-12.9311	0	0	-0.000169016	1	0	J07CA Bacterial and viral vaccines, combined	1
CAD	D	p1yr	R03BA	-13.7846	-1.09886	0	0	-0.0167274	0.987	0	R03BA Glucocorticoids	1
CAD	E	p1yr	A02BC	0.257769	0.367823	-1	-1	-0.806016	0.42	0	A02BC Proton pump inhibitors [DG:DG01646]	0.63
CAD	E	p1yr	A03AA	-0.477604	0.229392	0	0	-1.17299	0.241	0	A03AA Synthetic anticholinergics, esters with tertiary amino group	0.482
CAD	E	p1yr	A10AE	-0.178356	-0.364089	0	0	0.365667	0.715	0	A10AE Insulins and analogues for injection, long-acting	0.757
CAD	E	p1yr	A10BA	-0.238184	0.212731	0	-1	-1.88874	0.0589	0	A10BA Biguanides [DG:DG01684]	0.482
CAD	E	p1yr	B01AC	0.0677624	0.286863	0	-1	-1.49635	0.135	0	B01AC Platelet aggregation inhibitors excl. heparin	0.482
CAD	E	p1yr	C07AB	-0.133019	0.252425	0	-1	-2.68601	0.00723	1	C07AB Beta blocking AGE>70nts, selective	0.13
CAD	E	p1yr	C08CA	-0.0128279	0.0855239	0	0	-0.617407	0.537	0	C08CA Dihydropyridine derivatives [DG:DG01928]	0.69
CAD	E	p1yr	C09AA	-0.217184	-0.0449729	0	0	-1.1981	0.231	0	C09AA ACE inhibitors, plain [DG:DG01501]	0.482
CAD	E	p1yr	C09CA	-0.109907	0.0615578	0	0	-0.973389	0.33	0	C09CA Angiotensin II receptor blockers, plain [DG:DG01495]	0.571
CAD	E	p1yr	C10AA	-0.108733	0.11025	0	-1	-1.36081	0.174	0	C10AA HMG CoA reductase inhibitors [DG:DG01660]	0.482
CAD	E	p1yr	G03CA	-0.422363	0.0131172	0	0	-0.937036	0.349	0	G03CA Natural and semisynthetic estrogens, plain	0.571
CAD	E	p1yr	G04CB	0.364257	-0.0507157	0	0	1.43459	0.151	0	G04CB Testosterone-5-alpha reductase inhibitors	0.482
CAD	E	p1yr	H03AA	-0.0664487	0.0536143	0	0	-0.537658	0.591	0	H03AA Thyroid hormones	0.709
CAD	E	p1yr	J07AL	0.281913	-0.681368	0	1	1.43273	0.152	0	J07AL Pneumococcal vaccines	0.482
CAD	E	p1yr	J07AP	-0.978192	-0.201852	0	0	-0.478141	0.633	0	J07AP Typhoid vaccines	0.712
CAD	E	p1yr	J07BB	-0.565336	-0.283863	1	1	-1.2644	0.206	0	J07BB Influenza vaccines	0.482
CAD	E	p1yr	J07CA	-0.336353	-0.491736	0	1	0.185633	0.853	0	J07CA Bacterial and viral vaccines, combined	0.853
CAD	E	p1yr	R03BA	-0.127046	0.120265	0	0	-0.721462	0.471	0	R03BA Glucocorticoids	0.652
CAD	F	p1yr	A02BC	-0.09272	-0.175001	0	1	0.570511	0.568	0	A02BC Proton pump inhibitors [DG:DG01646]	0.996
CAD	F	p1yr	A03AA	-0.760384	-0.122928	0	0	-1.01971	0.308	0	A03AA Synthetic anticholinergics, esters with tertiary amino group	0.996
CAD	F	p1yr	A10AE	-0.341166	-0.59428	0	1	0.46824	0.64	0	A10AE Insulins and analogues for injection, long-acting	0.996
CAD	F	p1yr	A10BA	-0.143257	0.235256	0	-1	-1.47706	0.14	0	A10BA Biguanides [DG:DG01684]	0.84
CAD	F	p1yr	B01AC	0.0635701	-0.103074	0	0	1.0737	0.283	0	B01AC Platelet aggregation inhibitors excl. heparin	0.996
CAD	F	p1yr	C07AB	-0.18727	-0.14786	0	1	-0.258148	0.796	0	C07AB Beta blocking AGE>70nts, selective	0.996
CAD	F	p1yr	C08CA	-0.0384278	-0.0290034	0	0	-0.0559409	0.955	0	C08CA Dihydropyridine derivatives [DG:DG01928]	0.996
CAD	F	p1yr	C09AA	-0.217144	-0.0954987	0	0	-0.797383	0.425	0	C09AA ACE inhibitors, plain [DG:DG01501]	0.996
CAD	F	p1yr	C09CA	-0.102853	-0.101936	0	0	-0.00491893	0.996	0	C09CA Angiotensin II receptor blockers, plain [DG:DG01495]	0.996
CAD	F	p1yr	C10AA	0.0172131	0.0766478	0	0	-0.349228	0.727	0	C10AA HMG CoA reductase inhibitors [DG:DG01660]	0.996
CAD	F	p1yr	G03CA	-0.58	-0.288067	0	1	-0.606353	0.544	0	G03CA Natural and semisynthetic estrogens, plain	0.996
CAD	F	p1yr	G04CB	0.155062	-0.397069	0	1	1.80344	0.0713	0	G04CB Testosterone-5-alpha reductase inhibitors	0.642
CAD	F	p1yr	H03AA	-0.0898894	-0.0702812	0	0	-0.0831321	0.934	0	H03AA Thyroid hormones	0.996
CAD	F	p1yr	J07AL	0.749283	-0.86765	0	1	2.09594	0.0361	-1	J07AL Pneumococcal vaccines	0.642
CAD	F	p1yr	J07AP	-0.66654	-0.400992	0	0	-0.155164	0.877	0	J07AP Typhoid vaccines	0.996
CAD	F	p1yr	J07BB	-0.665138	-0.498052	1	1	-0.721229	0.471	0	J07BB Influenza vaccines	0.996
CAD	F	p1yr	J07CA	0.264439	-0.481426	0	1	0.823711	0.41	0	J07CA Bacterial and viral vaccines, combined	0.996
CAD	F	p1yr	R03BA	-0.159117	-0.0485516	0	0	-0.307385	0.759	0	R03BA Glucocorticoids	0.996
CAD	G	p1yr	A02BC	-0.169209	-0.108199	0	0	-0.301474	0.763	0	A02BC Proton pump inhibitors [DG:DG01646]	0.979
CAD	G	p1yr	A03AA	-1.43247	0.0954406	0	0	-1.27225	0.203	0	A03AA Synthetic anticholinergics, esters with tertiary amino group	0.871
CAD	G	p1yr	A10AE	-0.0674683	-0.214694	0	0	0.228638	0.819	0	A10AE Insulins and analogues for injection, long-acting	0.979
CAD	G	p1yr	A10BA	-0.132381	0.259107	0	0	-1.17013	0.242	0	A10BA Biguanides [DG:DG01684]	0.871
CAD	G	p1yr	B01AC	0.0308409	-0.0320782	0	0	0.287099	0.774	0	B01AC Platelet aggregation inhibitors excl. heparin	0.979
CAD	G	p1yr	C07AB	-0.289175	0.0932349	0	0	-1.79418	0.0728	0	C07AB Beta blocking AGE>70nts, selective	0.871
CAD	G	p1yr	C08CA	-0.131246	-0.0119241	0	0	-0.510697	0.61	0	C08CA Dihydropyridine derivatives [DG:DG01928]	0.979
CAD	G	p1yr	C09AA	-0.379001	-0.156617	0	0	-1.01415	0.311	0	C09AA ACE inhibitors, plain [DG:DG01501]	0.933
CAD	G	p1yr	C09CA	-0.282268	-0.112501	0	0	-0.631025	0.528	0	C09CA Angiotensin II receptor blockers, plain [DG:DG01495]	0.979
CAD	G	p1yr	C10AA	-0.137847	-0.126266	0	0	-0.0490402	0.961	0	C10AA HMG CoA reductase inhibitors [DG:DG01660]	0.979
CAD	G	p1yr	G03CA	-0.355734	-0.159674	0	0	-0.298139	0.766	0	G03CA Natural and semisynthetic estrogens, plain	0.979
CAD	G	p1yr	G04CB	0.177081	-0.310767	0	0	1.21527	0.224	0	G04CB Testosterone-5-alpha reductase inhibitors	0.871
CAD	G	p1yr	H03AA	-0.455967	0.0359595	0	0	-1.35268	0.176	0	H03AA Thyroid hormones	0.871
CAD	G	p1yr	J07AL	-12.8381	-0.810493	0	0	-0.0262913	0.979	0	J07AL Pneumococcal vaccines	0.979
CAD	G	p1yr	J07AP	0.209725	-0.379057	0	0	0.331102	0.741	0	J07AP Typhoid vaccines	0.979
CAD	G	p1yr	J07BB	-0.473405	-0.484781	0	1	0.0377387	0.97	0	J07BB Influenza vaccines	0.979
CAD	G	p1yr	J07CA	-0.445717	-0.795678	0	0	0.205648	0.837	0	J07CA Bacterial and viral vaccines, combined	0.979
CAD	G	p1yr	R03BA	-0.426536	-0.238729	0	0	-0.327141	0.744	0	R03BA Glucocorticoids	0.979
CAD	H	p1yr	A02BC	-0.550947	-0.432583	0	1	-0.257355	0.797	0	A02BC Proton pump inhibitors [DG:DG01646]	1
CAD	H	p1yr	A03AA	-13.7462	-13.9689	0	0	0.000235864	1	0	A03AA Synthetic anticholinergics, esters with tertiary amino group	1
CAD	H	p1yr	A10AE	0.634679	0.199695	0	0	0.34727	0.728	0	A10AE Insulins and analogues for injection, long-acting	1
CAD	H	p1yr	A10BA	-0.886358	-0.0511893	0	0	-0.973654	0.33	0	A10BA Biguanides [DG:DG01684]	1
CAD	H	p1yr	B01AC	-0.168484	-0.506306	0	0	0.652511	0.514	0	B01AC Platelet aggregation inhibitors excl. heparin	1
CAD	H	p1yr	C07AB	-0.44097	0.189794	0	0	-1.30401	0.192	0	C07AB Beta blocking AGE>70nts, selective	1
CAD	H	p1yr	C08CA	-1.09788	-0.157761	0	0	-1.446	0.148	0	C08CA Dihydropyridine derivatives [DG:DG01928]	1
CAD	H	p1yr	C09AA	-0.450563	-0.518862	0	0	0.131845	0.895	0	C09AA ACE inhibitors, plain [DG:DG01501]	1
CAD	H	p1yr	C09CA	-0.37028	-0.247275	0	0	-0.196614	0.844	0	C09CA Angiotensin II receptor blockers, plain [DG:DG01495]	1
CAD	H	p1yr	C10AA	-0.801077	-0.455375	0	1	-0.710431	0.477	0	C10AA HMG CoA reductase inhibitors [DG:DG01660]	1
CAD	H	p1yr	G03CA	-14.6043	-1.10722	0	0	-0.0129177	0.99	0	G03CA Natural and semisynthetic estrogens, plain	1
CAD	H	p1yr	G04CB	0.83804	-1.50686	0	0	2.40591	0.0161	-1	G04CB Testosterone-5-alpha reductase inhibitors	0.29
CAD	H	p1yr	H03AA	-0.683735	0.363248	0	0	-1.20318	0.229	0	H03AA Thyroid hormones	1
CAD	H	p1yr	J07AL	-13.1249	-13.6734	0	0	0.00041115	1	0	J07AL Pneumococcal vaccines	1
CAD	H	p1yr	J07AP	-11.9287	-13.7996	0	0	0.00101848	0.999	0	J07AP Typhoid vaccines	1
CAD	H	p1yr	J07BB	-2.55236	-1.25606	0	1	-0.86221	0.389	0	J07BB Influenza vaccines	1
CAD	H	p1yr	J07CA	-12.945	-13.6565	0	0	0.000540773	1	0	J07CA Bacterial and viral vaccines, combined	1
CAD	H	p1yr	R03BA	-14.2853	-1.19914	0	0	-0.0144056	0.989	0	R03BA Glucocorticoids	1
Dementia	A	p1yr	A02BC	-0.852211	0.521912	0	-1	-1.26482	0.206	0	A02BC Proton pump inhibitors [DG:DG01646]	0.997
Dementia	A	p1yr	A10AE	4.46745	0.0581652	0	0	0.907575	0.364	0	A10AE Insulins and analogues for injection, long-acting	0.997
Dementia	A	p1yr	A10BA	0.761907	0.216687	0	0	0.30738	0.759	0	A10BA Biguanides [DG:DG01684]	0.997
Dementia	A	p1yr	B01AC	0.0587485	0.307503	0	0	-0.188748	0.85	0	B01AC Platelet aggregation inhibitors excl. heparin	0.997
Dementia	A	p1yr	C07AB	1.7633	0.0466832	0	0	1.07625	0.282	0	C07AB Beta blocking AGE>70nts, selective	0.997
Dementia	A	p1yr	C08CA	0.644878	0.0890065	0	0	0.363783	0.716	0	C08CA Dihydropyridine derivatives [DG:DG01928]	0.997
Dementia	A	p1yr	C09AA	0.0453743	0.245521	0	-1	-0.141606	0.887	0	C09AA ACE inhibitors, plain [DG:DG01501]	0.997
Dementia	A	p1yr	C09CA	1.48957	-0.00432738	0	0	0.693499	0.488	0	C09CA Angiotensin II receptor blockers, plain [DG:DG01495]	0.997
Dementia	A	p1yr	C10AA	0.875424	-0.105886	0	0	0.795419	0.426	0	C10AA HMG CoA reductase inhibitors [DG:DG01660]	0.997
Dementia	A	p1yr	G03CA	16.4587	-0.117142	0	0	0.0041178	0.997	0	G03CA Natural and semisynthetic estrogens, plain	0.997
Dementia	A	p1yr	G04CB	-0.506489	-0.330241	0	1	-0.0670865	0.947	0	G04CB Testosterone-5-alpha reductase inhibitors	0.997
Dementia	A	p1yr	H03AA	-0.132936	0.176665	0	0	-0.209699	0.834	0	H03AA Thyroid hormones	0.997
Dementia	A	p1yr	J07BB	-0.611218	0.15062	0	0	-0.289461	0.772	0	J07BB Influenza vaccines	0.997
Dementia	A	p1yr	R03BA	-14.275	0.707264	0	-1	-0.00398424	0.997	0	R03BA Glucocorticoids	0.997
Dementia	B	p1yr	A02BC	-1.93465	0.219512	0	-1	-1.55106	0.121	0	A02BC Proton pump inhibitors [DG:DG01646]	0.423
Dementia	B	p1yr	A10AE	6.53395	0.33603	0	-1	0.851092	0.395	0	A10AE Insulins and analogues for injection, long-acting	0.922
Dementia	B	p1yr	A10BA	0.573071	0.0542465	0	0	0.233411	0.815	0	A10BA Biguanides [DG:DG01684]	0.999
Dementia	B	p1yr	B01AC	-0.120566	0.309662	0	0	-0.331948	0.74	0	B01AC Platelet aggregation inhibitors excl. heparin	0.999
Dementia	B	p1yr	C07AB	5.13556	0.192443	0	-1	1.91411	0.0556	0	C07AB Beta blocking AGE>70nts, selective	0.423
Dementia	B	p1yr	C08CA	0.154306	-0.0201334	0	0	0.105747	0.916	0	C08CA Dihydropyridine derivatives [DG:DG01928]	0.999
Dementia	B	p1yr	C09AA	0.164442	0.300073	0	-1	-0.0832395	0.934	0	C09AA ACE inhibitors, plain [DG:DG01501]	0.999
Dementia	B	p1yr	C09CA	4.83684	0.0845604	0	0	1.62996	0.103	0	C09CA Angiotensin II receptor blockers, plain [DG:DG01495]	0.423
Dementia	B	p1yr	C10AA	2.77066	-0.10708	0	0	1.62945	0.103	0	C10AA HMG CoA reductase inhibitors [DG:DG01660]	0.423
Dementia	B	p1yr	G03CA	-17.4403	0.0221975	0	0	-0.00159589	0.999	0	G03CA Natural and semisynthetic estrogens, plain	0.999
Dementia	B	p1yr	G04CB	-0.654295	-0.0721495	0	0	-0.177225	0.859	0	G04CB Testosterone-5-alpha reductase inhibitors	0.999
Dementia	B	p1yr	H03AA	1.48011	-0.0758594	0	0	0.972874	0.331	0	H03AA Thyroid hormones	0.922
Dementia	B	p1yr	J07BB	-0.134392	0.0719945	0	0	-0.0823894	0.934	0	J07BB Influenza vaccines	0.999
Dementia	B	p1yr	R03BA	-15.3254	0.374848	0	-1	-0.00296986	0.998	0	R03BA Glucocorticoids	0.999
Dementia	C	p1yr	A02BC	-0.34964	0.385316	0	-1	-1.31222	0.189	0	A02BC Proton pump inhibitors [DG:DG01646]	0.997
Dementia	C	p1yr	A03AA	-14.3492	0.251152	0	0	-0.00857299	0.993	0	A03AA Synthetic anticholinergics, esters with tertiary amino group	0.997
Dementia	C	p1yr	A10AE	2.16376	-0.0521936	-1	0	1.94861	0.0513	0	A10AE Insulins and analogues for injection, long-acting	0.923
Dementia	C	p1yr	A10BA	1.31406	0.108347	0	0	1.2388	0.215	0	A10BA Biguanides [DG:DG01684]	0.997
Dementia	C	p1yr	B01AC	0.271535	0.219411	0	-1	0.0948737	0.924	0	B01AC Platelet aggregation inhibitors excl. heparin	0.997
Dementia	C	p1yr	C07AB	0.8234	0.259	0	-1	0.832845	0.405	0	C07AB Beta blocking AGE>70nts, selective	0.997
Dementia	C	p1yr	C08CA	-0.314291	0.0486455	0	0	-0.517322	0.605	0	C08CA Dihydropyridine derivatives [DG:DG01928]	0.997
Dementia	C	p1yr	C09AA	0.0438342	-0.205667	0	1	0.345171	0.73	0	C09AA ACE inhibitors, plain [DG:DG01501]	0.997
Dementia	C	p1yr	C09CA	0.519767	-0.0661075	0	0	0.698376	0.485	0	C09CA Angiotensin II receptor blockers, plain [DG:DG01495]	0.997
Dementia	C	p1yr	C10AA	-0.0102877	-0.142476	0	1	0.24937	0.803	0	C10AA HMG CoA reductase inhibitors [DG:DG01660]	0.997
Dementia	C	p1yr	G03CA	-0.276118	0.0903748	0	0	-0.179527	0.858	0	G03CA Natural and semisynthetic estrogens, plain	0.997
Dementia	C	p1yr	G04CB	-0.103349	0.124552	0	0	-0.169649	0.865	0	G04CB Testosterone-5-alpha reductase inhibitors	0.997
Dementia	C	p1yr	H03AA	0.134993	0.0849524	0	0	0.0610706	0.951	0	H03AA Thyroid hormones	0.997
Dementia	C	p1yr	J07AL	-13.3298	-0.758269	0	0	-0.00431567	0.997	0	J07AL Pneumococcal vaccines	0.997
Dementia	C	p1yr	J07AP	-15.0852	-0.207834	0	0	-0.0036418	0.997	0	J07AP Typhoid vaccines	0.997
Dementia	C	p1yr	J07BB	-0.841819	-0.293243	0	1	-0.617783	0.537	0	J07BB Influenza vaccines	0.997
Dementia	C	p1yr	J07CA	-14.5128	-0.834206	0	0	-0.00475503	0.996	0	J07CA Bacterial and viral vaccines, combined	0.997
Dementia	C	p1yr	R03BA	-14.0161	-0.120753	0	0	-0.00987773	0.992	0	R03BA Glucocorticoids	0.997
Dementia	D	p1yr	A02BC	-0.60564	-0.0367858	0	0	-0.701617	0.483	0	A02BC Proton pump inhibitors [DG:DG01646]	1
Dementia	D	p1yr	A03AA	-15.284	-13.4682	0	0	-0.000411822	1	0	A03AA Synthetic anticholinergics, esters with tertiary amino group	1
Dementia	D	p1yr	A10AE	4.43379	-0.0808148	-1	0	2.20283	0.0276	-1	A10AE Insulins and analogues for injection, long-acting	0.248
Dementia	D	p1yr	A10BA	1.80157	-0.605456	0	0	1.77283	0.0763	0	A10BA Biguanides [DG:DG01684]	0.318
Dementia	D	p1yr	B01AC	0.819073	-0.423671	0	0	1.69156	0.0907	0	B01AC Platelet aggregation inhibitors excl. heparin	0.318
Dementia	D	p1yr	C07AB	1.89256	0.0434143	-1	0	1.88545	0.0594	0	C07AB Beta blocking AGE>70nts, selective	0.318
Dementia	D	p1yr	C08CA	-0.419423	-0.362234	0	0	-0.0534371	0.957	0	C08CA Dihydropyridine derivatives [DG:DG01928]	1
Dementia	D	p1yr	C09AA	-0.193886	-0.555187	0	1	0.322336	0.747	0	C09AA ACE inhibitors, plain [DG:DG01501]	1
Dementia	D	p1yr	C09CA	2.16953	-0.344895	-1	0	2.35045	0.0188	-1	C09CA Angiotensin II receptor blockers, plain [DG:DG01495]	0.248
Dementia	D	p1yr	C10AA	0.461992	-0.711048	0	1	1.61714	0.106	0	C10AA HMG CoA reductase inhibitors [DG:DG01660]	0.318
Dementia	D	p1yr	G03CA	-16.0319	-1.10341	0	0	-0.00340508	0.997	0	G03CA Natural and semisynthetic estrogens, plain	1
Dementia	D	p1yr	G04CB	0.279265	-0.264657	0	0	0.327913	0.743	0	G04CB Testosterone-5-alpha reductase inhibitors	1
Dementia	D	p1yr	H03AA	1.10832	0.144232	0	0	0.982128	0.326	0	H03AA Thyroid hormones	0.838
Dementia	D	p1yr	J07AL	-14.3038	-13.0176	0	0	-0.000169528	1	0	J07AL Pneumococcal vaccines	1
Dementia	D	p1yr	J07AP	-15.7919	-12.994	0	0	-0.000271643	1	0	J07AP Typhoid vaccines	1
Dementia	D	p1yr	J07BB	-1.34125	-1.28845	0	1	-0.0363969	0.971	0	J07BB Influenza vaccines	1
Dementia	D	p1yr	J07CA	-15.5787	-12.9855	0	0	-0.000351409	1	0	J07CA Bacterial and viral vaccines, combined	1
Dementia	D	p1yr	R03BA	-15.434	-1.25689	0	0	-0.00400961	0.997	0	R03BA Glucocorticoids	1
Dementia	E	p1yr	A02BC	-0.174574	0.361038	0	-1	-1.30631	0.191	0	A02BC Proton pump inhibitors [DG:DG01646]	0.997
Dementia	E	p1yr	A03AA	-14.938	0.177771	0	0	-0.0085116	0.993	0	A03AA Synthetic anticholinergics, esters with tertiary amino group	0.997
Dementia	E	p1yr	A10AE	1.36484	-0.384026	0	0	1.8313	0.0671	0	A10AE Insulins and analogues for injection, long-acting	0.997
Dementia	E	p1yr	A10BA	1.04561	0.14193	0	0	1.23353	0.217	0	A10BA Biguanides [DG:DG01684]	0.997
Dementia	E	p1yr	B01AC	0.154534	0.241661	0	-1	-0.205561	0.837	0	B01AC Platelet aggregation inhibitors excl. heparin	0.997
Dementia	E	p1yr	C07AB	0.203078	0.1679	0	-1	0.0667632	0.947	0	C07AB Beta blocking AGE>70nts, selective	0.997
Dementia	E	p1yr	C08CA	-0.406123	0.0799854	0	0	-0.915153	0.36	0	C08CA Dihydropyridine derivatives [DG:DG01928]	0.997
Dementia	E	p1yr	C09AA	0.0941035	-0.072675	0	0	0.31352	0.754	0	C09AA ACE inhibitors, plain [DG:DG01501]	0.997
Dementia	E	p1yr	C09CA	-0.0728529	0.0410512	0	0	-0.164956	0.869	0	C09CA Angiotensin II receptor blockers, plain [DG:DG01495]	0.997
Dementia	E	p1yr	C10AA	-0.334134	0.0984283	0	-1	-1.0692	0.285	0	C10AA HMG CoA reductase inhibitors [DG:DG01660]	0.997
Dementia	E	p1yr	G03CA	-0.797011	0.00166321	0	0	-0.398714	0.69	0	G03CA Natural and semisynthetic estrogens, plain	0.997
Dementia	E	p1yr	G04CB	0.172066	0.0469341	0	0	0.122562	0.902	0	G04CB Testosterone-5-alpha reductase inhibitors	0.997
Dementia	E	p1yr	H03AA	0.154592	0.0429215	0	0	0.184774	0.853	0	H03AA Thyroid hormones	0.997
Dementia	E	p1yr	J07AL	-14.0184	-0.590015	0	1	-0.00433839	0.997	0	J07AL Pneumococcal vaccines	0.997
Dementia	E	p1yr	J07AP	-14.55	-0.224158	0	0	-0.00585173	0.995	0	J07AP Typhoid vaccines	0.997
Dementia	E	p1yr	J07BB	-1.10902	-0.303805	0	1	-1.03679	0.3	0	J07BB Influenza vaccines	0.997
Dementia	E	p1yr	J07CA	-15.3406	-0.480396	0	1	-0.00503966	0.996	0	J07CA Bacterial and viral vaccines, combined	0.997
Dementia	E	p1yr	R03BA	0.199961	0.100961	0	0	0.0751503	0.94	0	R03BA Glucocorticoids	0.997
Dementia	F	p1yr	A02BC	0.10992	-0.17256	0	1	0.562523	0.574	0	A02BC Proton pump inhibitors [DG:DG01646]	0.995
Dementia	F	p1yr	A03AA	-16.3169	-0.176684	0	0	-0.00810656	0.994	0	A03AA Synthetic anticholinergics, esters with tertiary amino group	0.995
Dementia	F	p1yr	A10AE	1.09797	-0.606191	0	1	1.44389	0.149	0	A10AE Insulins and analogues for injection, long-acting	0.995
Dementia	F	p1yr	A10BA	0.721143	0.173482	0	-1	0.609102	0.542	0	A10BA Biguanides [DG:DG01684]	0.995
Dementia	F	p1yr	B01AC	0.330574	-0.0807896	0	0	0.739998	0.459	0	B01AC Platelet aggregation inhibitors excl. heparin	0.995
Dementia	F	p1yr	C07AB	-0.415328	-0.155756	0	1	-0.384927	0.7	0	C07AB Beta blocking AGE>70nts, selective	0.995
[truncated: 4,854 more rows]
