# Supplementary material for: Exploring Drugs and Vaccines Associated with Altered Risks and Severity of COVID-19: A UK Biobank Cohort Study of All ATC Level-4 Drug Categories Reveals Repositioning Opportunities
Source: Pharmaceutics. 2021 Sep 18;13(9):1514. doi: 10.3390/pharmaceutics13091514 (PMC8471264; doi:10.3390/pharmaceutics13091514)
Supplement: Supplementary file 1 [file pharmaceutics-13-01514-s001.zip › TableS12_Summary_interaction-analysis_resultsFDRlessThan0.2.xlsx]

## Sheet: Sheet1
atc code	Interacting variable	Name of Drug	drug	Interaction term	Interacting variables(risk factor)	Model A	B	C	D	E	F	G	H		P 6m	P 1 yr	P 2yr	P 5yr	P 10yr
A02BC	AGE (continuous)	Proton pump inhibitors [DG:DG01646]	-1/1	1/-1	-1				+		+				+		+
A03AA	AGE (continuous)	Synthetic anticholinergics, esters with tertiary amino group	1	-1	-1	+												+
A10AE	AGE (continuous)	Insulins and analogues for injection, long-acting	1	-1	-1					+	+				+	+	+	+
A10BA	AGE (continuous)	Biguanides [DG:DG01684]
B01AC	AGE (continuous)	Platelet aggregation inhibitors excl. heparin	1	-1	-1	+		+		+	+	+			+	+	+	+
C07AB	AGE (continuous)	Beta blocking agents, selective	1	-1	-1	+		+			+	+			+	+	+	+
C08CA	AGE (continuous)	Dihydropyridine derivatives [DG:DG01928]	1	-1	-1					+	+	+					+	+
C09AA	AGE (continuous)	ACE inhibitors, plain [DG:DG01501]	1	-1	-1						+							+
C09CA	AGE (continuous)	Angiotensin II receptor blockers, plain [DG:DG01495]	1	-1	-1						+	+					+	+
C10AA	AGE (continuous)	HMG CoA reductase inhibitors [DG:DG01660]	1	-1	-1			+		+	+	+			+	+	+	+
G03CA	AGE (continuous)	Natural and semisynthetic estrogens, plain
G04CB	AGE (continuous)	Testosterone-5-alpha reductase inhibitors	1	-1	-1					+	+	+			+
H03AA	AGE (continuous)	Thyroid hormones
J07AL	AGE (continuous)	Pneumococcal vaccines	1	-1	-1	+		+				+					+		+
J07AP	AGE (continuous)	Typhoid vaccines
J07BB	AGE (continuous)	Influenza vaccines
J07CA	AGE (continuous)	Bacterial and viral vaccines, combined
R03BA	AGE (continuous)	Glucocorticoids	-1	1	-1		+		+				+					+
A02BC	AGE over 70 (category)	Proton pump inhibitors [DG:DG01646]	0	-1	-1						+				+
A03AA	AGE over 70 (category)	Synthetic anticholinergics, esters with tertiary amino group
A10AE	AGE over 70 (category)	Insulins and analogues for injection, long-acting	0	-1	-1					+	+				+	+		+
A10BA	AGE over 70 (category)	Biguanides [DG:DG01684]	0	-1	-1					+	+						+	+
B01AC	AGE over 70 (category)	Platelet aggregation inhibitors excl. heparin	0	-1	-1			+		+	+	+			+	+	+	+
C07AB	AGE over 70 (category)	Beta blocking agents, selective	0	-1	-1						+							+
C08CA	AGE over 70 (category)	Dihydropyridine derivatives [DG:DG01928]	0	-1	-1					+	+				+		+	+
C09AA	AGE over 70 (category)	ACE inhibitors, plain [DG:DG01501]	0	-1	-1						+							+
C09CA	AGE over 70 (category)	Angiotensin II receptor blockers, plain [DG:DG01495]
C10AA	AGE over 70 (category)	HMG CoA reductase inhibitors [DG:DG01660]	0	-1	-1			+			+	+			+	+	+	+
G03CA	AGE over 70 (category)	Natural and semisynthetic estrogens, plain
G04CB	AGE over 70 (category)	Testosterone-5-alpha reductase inhibitors	0	-1	-1						+				+
H03AA	AGE over 70 (category)	Thyroid hormones
J07AL	AGE over 70 (category)	Pneumococcal vaccines	0	-1	-1	+		+				+			+	+	+	+	+
J07AP	AGE over 70 (category)	Typhoid vaccines
J07BB	AGE over 70 (category)	Influenza vaccines	0	-1	-1					+	+							+
J07CA	AGE over 70 (category)	Bacterial and viral vaccines, combined
R03BA	AGE over 70 (category)	Glucocorticoids	0	-1	-1						+				+
A02BC	Asthma	Proton pump inhibitors [DG:DG01646]
A03AA	Asthma	Synthetic anticholinergics, esters with tertiary amino group
A10AE	Asthma	Insulins and analogues for injection, long-acting	0	-1	0					+					+
A10BA	Asthma	Biguanides [DG:DG01684]	0	-1	0					+	+				+	+
B01AC	Asthma	Platelet aggregation inhibitors excl. heparin
C07AB	Asthma	Beta blocking agents, selective
C08CA	Asthma	Dihydropyridine derivatives [DG:DG01928]	1	-1	0							+					+
C09AA	Asthma	ACE inhibitors, plain [DG:DG01501]
C09CA	Asthma	Angiotensin II receptor blockers, plain [DG:DG01495]	1	-1	0						+					+
C10AA	Asthma	HMG CoA reductase inhibitors [DG:DG01660]
G03CA	Asthma	Natural and semisynthetic estrogens, plain
G04CB	Asthma	Testosterone-5-alpha reductase inhibitors
H03AA	Asthma	Thyroid hormones
J07AL	Asthma	Pneumococcal vaccines	1/0	-1	0						+	+			+	+
J07AP	Asthma	Typhoid vaccines
J07BB	Asthma	Influenza vaccines	1	1	0					+	+							+	+
J07CA	Asthma	Bacterial and viral vaccines, combined
R03BA	Asthma	Glucocorticoids
A02BC	BMI (continuous)	Proton pump inhibitors [DG:DG01646]	0/-1	1	-1	+		+		+		+			+	+	+	+
A03AA	BMI (continuous)	Synthetic anticholinergics, esters with tertiary amino group	0	-1	-1					+	+				+
A10AE	BMI (continuous)	Insulins and analogues for injection, long-acting
A10BA	BMI (continuous)	Biguanides [DG:DG01684]	0	1	-1			+				+				+	+	+
B01AC	BMI (continuous)	Platelet aggregation inhibitors excl. heparin	0/-1	1	-1				+				+					+
C07AB	BMI (continuous)	Beta blocking agents, selective
C08CA	BMI (continuous)	Dihydropyridine derivatives [DG:DG01928]
C09AA	BMI (continuous)	ACE inhibitors, plain [DG:DG01501]
C09CA	BMI (continuous)	Angiotensin II receptor blockers, plain [DG:DG01495]
C10AA	BMI (continuous)	HMG CoA reductase inhibitors [DG:DG01660]	1/0/-1	1	-1			+		+					+	+	+	+
G03CA	BMI (continuous)	Natural and semisynthetic estrogens, plain
G04CB	BMI (continuous)	Testosterone-5-alpha reductase inhibitors
H03AA	BMI (continuous)	Thyroid hormones
J07AL	BMI (continuous)	Pneumococcal vaccines	1/0	-1	-1					+	+						+		+
J07AP	BMI (continuous)	Typhoid vaccines	0	-1	-1				+	+	+								+
J07BB	BMI (continuous)	Influenza vaccines	1	-1	-1					+	+					+	+	+
J07CA	BMI (continuous)	Bacterial and viral vaccines, combined	0	-1	-1				+	+	+						+	+
R03BA	BMI (continuous)	Glucocorticoids
A02BC	CAD	Proton pump inhibitors [DG:DG01646]	0	1	-1			+									+	+
A03AA	CAD	Synthetic anticholinergics, esters with tertiary amino group	0	1	-1					+	+							+
A10AE	CAD	Insulins and analogues for injection, long-acting
A10BA	CAD	Biguanides [DG:DG01684]
B01AC	CAD	Platelet aggregation inhibitors excl. heparin	0/-1	1	-1			+		+						+	+	+
C07AB	CAD	Beta blocking agents, selective	-1/0	1	-1			+		+					+	+	+	+
C08CA	CAD	Dihydropyridine derivatives [DG:DG01928]
C09AA	CAD	ACE inhibitors, plain [DG:DG01501]
C09CA	CAD	Angiotensin II receptor blockers, plain [DG:DG01495]
C10AA	CAD	HMG CoA reductase inhibitors [DG:DG01660]	1	1	-1			+		+						+	+	+
G03CA	CAD	Natural and semisynthetic estrogens, plain
G04CB	CAD	Testosterone-5-alpha reductase inhibitors
H03AA	CAD	Thyroid hormones
J07AL	CAD	Pneumococcal vaccines	1	-1	-1			+		+	+	+				+	+	+
J07AP	CAD	Typhoid vaccines
J07BB	CAD	Influenza vaccines
J07CA	CAD	Bacterial and viral vaccines, combined
R03BA	CAD	Glucocorticoids
A02BC	Dementia	Proton pump inhibitors [DG:DG01646]
A03AA	Dementia	Synthetic anticholinergics, esters with tertiary amino group
A10AE	Dementia	Insulins and analogues for injection, long-acting
A10BA	Dementia	Biguanides [DG:DG01684]
B01AC	Dementia	Platelet aggregation inhibitors excl. heparin
C07AB	Dementia	Beta blocking agents, selective
C08CA	Dementia	Dihydropyridine derivatives [DG:DG01928]
C09AA	Dementia	ACE inhibitors, plain [DG:DG01501]
C09CA	Dementia	Angiotensin II receptor blockers, plain [DG:DG01495]
C10AA	Dementia	HMG CoA reductase inhibitors [DG:DG01660]	0	1	0		+								+	+
G03CA	Dementia	Natural and semisynthetic estrogens, plain
G04CB	Dementia	Testosterone-5-alpha reductase inhibitors
H03AA	Dementia	Thyroid hormones
J07AL	Dementia	Pneumococcal vaccines
J07AP	Dementia	Typhoid vaccines
J07BB	Dementia	Influenza vaccines
J07CA	Dementia	Bacterial and viral vaccines, combined	0	-1	0				+			+	+						+
R03BA	Dementia	Glucocorticoids
A02BC	COPD	Proton pump inhibitors [DG:DG01646]
A03AA	COPD	Synthetic anticholinergics, esters with tertiary amino group
A10AE	COPD	Insulins and analogues for injection, long-acting
A10BA	COPD	Biguanides [DG:DG01684]
B01AC	COPD	Platelet aggregation inhibitors excl. heparin
C07AB	COPD	Beta blocking agents, selective
C08CA	COPD	Dihydropyridine derivatives [DG:DG01928]	1	-1	0							+			+	+	+	+
C09AA	COPD	ACE inhibitors, plain [DG:DG01501]
C09CA	COPD	Angiotensin II receptor blockers, plain [DG:DG01495]
C10AA	COPD	HMG CoA reductase inhibitors [DG:DG01660]
G03CA	COPD	Natural and semisynthetic estrogens, plain
G04CB	COPD	Testosterone-5-alpha reductase inhibitors
H03AA	COPD	Thyroid hormones
J07AL	COPD	Pneumococcal vaccines
J07AP	COPD	Typhoid vaccines	0	-1	0							+						+
J07BB	COPD	Influenza vaccines
J07CA	COPD	Bacterial and viral vaccines, combined
R03BA	COPD	Glucocorticoids
A02BC	Depression	Proton pump inhibitors [DG:DG01646]
A03AA	Depression	Synthetic anticholinergics, esters with tertiary amino group	1	-1	0						+							+
A10AE	Depression	Insulins and analogues for injection, long-acting
A10BA	Depression	Biguanides [DG:DG01684]
B01AC	Depression	Platelet aggregation inhibitors excl. heparin
C07AB	Depression	Beta blocking agents, selective
C08CA	Depression	Dihydropyridine derivatives [DG:DG01928]
C09AA	Depression	ACE inhibitors, plain [DG:DG01501]
C09CA	Depression	Angiotensin II receptor blockers, plain [DG:DG01495]
C10AA	Depression	HMG CoA reductase inhibitors [DG:DG01660]
G03CA	Depression	Natural and semisynthetic estrogens, plain
G04CB	Depression	Testosterone-5-alpha reductase inhibitors
H03AA	Depression	Thyroid hormones
J07AL	Depression	Pneumococcal vaccines
J07AP	Depression	Typhoid vaccines
J07BB	Depression	Influenza vaccines
J07CA	Depression	Bacterial and viral vaccines, combined
R03BA	Depression	Glucocorticoids
A02BC	DM	Proton pump inhibitors [DG:DG01646]
A03AA	DM	Synthetic anticholinergics, esters with tertiary amino group
A10AE	DM	Insulins and analogues for injection, long-acting
A10BA	DM	Biguanides [DG:DG01684]
B01AC	DM	Platelet aggregation inhibitors excl. heparin
C07AB	DM	Beta blocking agents, selective
C08CA	DM	Dihydropyridine derivatives [DG:DG01928]
C09AA	DM	ACE inhibitors, plain [DG:DG01501]
C09CA	DM	Angiotensin II receptor blockers, plain [DG:DG01495]
C10AA	DM	HMG CoA reductase inhibitors [DG:DG01660]	1	1	-1			+		+						+	+	+
G03CA	DM	Natural and semisynthetic estrogens, plain
G04CB	DM	Testosterone-5-alpha reductase inhibitors
H03AA	DM	Thyroid hormones
J07AL	DM	Pneumococcal vaccines
J07AP	DM	Typhoid vaccines
J07BB	DM	Influenza vaccines
J07CA	DM	Bacterial and viral vaccines, combined
R03BA	DM	Glucocorticoids
A02BC	Dx_cancer	Proton pump inhibitors [DG:DG01646]	1	-1	1						+	+			+	+
A03AA	Dx_cancer	Synthetic anticholinergics, esters with tertiary amino group
A10AE	Dx_cancer	Insulins and analogues for injection, long-acting
A10BA	Dx_cancer	Biguanides [DG:DG01684]
B01AC	Dx_cancer	Platelet aggregation inhibitors excl. heparin
C07AB	Dx_cancer	Beta blocking agents, selective
C08CA	Dx_cancer	Dihydropyridine derivatives [DG:DG01928]
C09AA	Dx_cancer	ACE inhibitors, plain [DG:DG01501]
C09CA	Dx_cancer	Angiotensin II receptor blockers, plain [DG:DG01495]
C10AA	Dx_cancer	HMG CoA reductase inhibitors [DG:DG01660]
G03CA	Dx_cancer	Natural and semisynthetic estrogens, plain
G04CB	Dx_cancer	Testosterone-5-alpha reductase inhibitors
H03AA	Dx_cancer	Thyroid hormones
J07AL	Dx_cancer	Pneumococcal vaccines	0	-1	1					+					+	+
J07AP	Dx_cancer	Typhoid vaccines
J07BB	Dx_cancer	Influenza vaccines
J07CA	Dx_cancer	Bacterial and viral vaccines, combined
R03BA	Dx_cancer	Glucocorticoids
A02BC	Ethnic (White)	Proton pump inhibitors [DG:DG01646]
A03AA	Ethnic (White)	Synthetic anticholinergics, esters with tertiary amino group
A10AE	Ethnic (White)	Insulins and analogues for injection, long-acting
A10BA	Ethnic (White)	Biguanides [DG:DG01684]	-1	1	1						+						+
B01AC	Ethnic (White)	Platelet aggregation inhibitors excl. heparin
C07AB	Ethnic (White)	Beta blocking agents, selective
C08CA	Ethnic (White)	Dihydropyridine derivatives [DG:DG01928]	0/-1	1	1	+									+	+
C09AA	Ethnic (White)	ACE inhibitors, plain [DG:DG01501]	-1/0	1	1			+				+			+
C09CA	Ethnic (White)	Angiotensin II receptor blockers, plain [DG:DG01495]	0	1	1					+							+
C10AA	Ethnic (White)	HMG CoA reductase inhibitors [DG:DG01660]
G03CA	Ethnic (White)	Natural and semisynthetic estrogens, plain
G04CB	Ethnic (White)	Testosterone-5-alpha reductase inhibitors
H03AA	Ethnic (White)	Thyroid hormones	0	1	1								+		+
J07AL	Ethnic (White)	Pneumococcal vaccines	0	1	1					+							+
J07AP	Ethnic (White)	Typhoid vaccines	-1/0	1	1					+	+					+	+	+	+
J07BB	Ethnic (White)	Influenza vaccines	0	1	1					+	+					+	+
J07CA	Ethnic (White)	Bacterial and viral vaccines, combined
R03BA	Ethnic (White)	Glucocorticoids
A02BC	Hypertension	Proton pump inhibitors [DG:DG01646]	0/-1	-1	-1					+	+					+	+	+
A03AA	Hypertension	Synthetic anticholinergics, esters with tertiary amino group	0	1	-1					+							+
A10AE	Hypertension	Insulins and analogues for injection, long-acting
A10BA	Hypertension	Biguanides [DG:DG01684]
B01AC	Hypertension	Platelet aggregation inhibitors excl. heparin	0	1	-1				+				+					+
C07AB	Hypertension	Beta blocking agents, selective	0	1	-1					+							+	+
C08CA	Hypertension	Dihydropyridine derivatives [DG:DG01928]	0	1	-1					+						+
C09AA	Hypertension	ACE inhibitors, plain [DG:DG01501]	0	1	-1					+						+	+	+
C09CA	Hypertension	Angiotensin II receptor blockers, plain [DG:DG01495]	-1	1	-1				+						+
C10AA	Hypertension	HMG CoA reductase inhibitors [DG:DG01660]	1	1	-1				+	+					+	+	+	+
G03CA	Hypertension	Natural and semisynthetic estrogens, plain
G04CB	Hypertension	Testosterone-5-alpha reductase inhibitors
H03AA	Hypertension	Thyroid hormones
J07AL	Hypertension	Pneumococcal vaccines	1	-1	-1					+	+								+
J07AP	Hypertension	Typhoid vaccines
J07BB	Hypertension	Influenza vaccines
J07CA	Hypertension	Bacterial and viral vaccines, combined
R03BA	Hypertension	Glucocorticoids
A02BC	Obesity	Proton pump inhibitors [DG:DG01646]
A03AA	Obesity	Synthetic anticholinergics, esters with tertiary amino group
A10AE	Obesity	Insulins and analogues for injection, long-acting
A10BA	Obesity	Biguanides [DG:DG01684]
B01AC	Obesity	Platelet aggregation inhibitors excl. heparin	0/-1	1	-1		+		+				+				+	+
C07AB	Obesity	Beta blocking agents, selective
C08CA	Obesity	Dihydropyridine derivatives [DG:DG01928]
C09AA	Obesity	ACE inhibitors, plain [DG:DG01501]
C09CA	Obesity	Angiotensin II receptor blockers, plain [DG:DG01495]
C10AA	Obesity	HMG CoA reductase inhibitors [DG:DG01660]	1	1	-1			+								+	+	+
G03CA	Obesity	Natural and semisynthetic estrogens, plain
G04CB	Obesity	Testosterone-5-alpha reductase inhibitors
H03AA	Obesity	Thyroid hormones
J07AL	Obesity	Pneumococcal vaccines	1/0	-1	-1					+	+					+	+	+	+
J07AP	Obesity	Typhoid vaccines
J07BB	Obesity	Influenza vaccines	1	-1	-1					+	+					+	+	+	+
J07CA	Obesity	Bacterial and viral vaccines, combined
R03BA	Obesity	Glucocorticoids
A02BC	Sex (male)	Proton pump inhibitors [DG:DG01646]	0	1	-1		+		+				+			+	+	+
A03AA	Sex (male)	Synthetic anticholinergics, esters with tertiary amino group
A10AE	Sex (male)	Insulins and analogues for injection, long-acting
A10BA	Sex (male)	Biguanides [DG:DG01684]
B01AC	Sex (male)	Platelet aggregation inhibitors excl. heparin
C07AB	Sex (male)	Beta blocking agents, selective
C08CA	Sex (male)	Dihydropyridine derivatives [DG:DG01928]
C09AA	Sex (male)	ACE inhibitors, plain [DG:DG01501]
C09CA	Sex (male)	Angiotensin II receptor blockers, plain [DG:DG01495]
C10AA	Sex (male)	HMG CoA reductase inhibitors [DG:DG01660]	0	1	-1		+		+				+				+	+
G03CA	Sex (male)	Natural and semisynthetic estrogens, plain
G04CB	Sex (male)	Testosterone-5-alpha reductase inhibitors
H03AA	Sex (male)	Thyroid hormones
J07AL	Sex (male)	Pneumococcal vaccines	1	-1	-1			+		+	+	+							+
J07AP	Sex (male)	Typhoid vaccines	0	1	-1						+					+
J07BB	Sex (male)	Influenza vaccines
J07CA	Sex (male)	Bacterial and viral vaccines, combined
R03BA	Sex (male)	Glucocorticoids
