# Supplementary material for: Exploring Drugs and Vaccines Associated with Altered Risks and Severity of COVID-19: A UK Biobank Cohort Study of All ATC Level-4 Drug Categories Reveals Repositioning Opportunities
Source: Pharmaceutics. 2021 Sep 18;13(9):1514. doi: 10.3390/pharmaceutics13091514 (PMC8471264; doi:10.3390/pharmaceutics13091514)
Supplement: Supplementary file 1 [file pharmaceutics-13-01514-s001.zip › TableS13_Full_results_interaction_analyses-fdr.xlsx]

## Sheet: tableS17_Full_results_interacti
drug	term	estimate	std.error	statistic	OR	conf.low	conf.high	p	sig	Full name	Model	Windows	Subgp	p.adjust
A02BC	A02BC	-0.0211358	0.121989	-0.17326	0.979086	0.770816	1.24363	0.863	0	A02BC Proton pump inhibitors [DG:DG01646]	A	p6m	AGE over 70	0.906
A02BC	age_over_70	0.830319	0.0930012	8.92804	2.29405	1.91168	2.7529	6.59e-19	-1	A02BC Proton pump inhibitors [DG:DG01646]	A	p6m	AGE over 70	2.13e-18
A02BC	A02BC:age_over_70	-0.104441	0.175664	-0.594551	0.900828	0.638365	1.2712	0.552	0	A02BC Proton pump inhibitors [DG:DG01646]	A	p6m	AGE over 70	0.719
A03AA	A03AA	0.0240465	0.587504	0.0409299	1.02434	0.323743	3.24105	0.967	0	A03AA Synthetic anticholinergics, esters with tertiary amino group	A	p6m	AGE over 70	0.985
A03AA	age_over_70	0.798692	0.083123	9.60856	2.22263	1.88839	2.61604	1.29e-21	-1	A03AA Synthetic anticholinergics, esters with tertiary amino group	A	p6m	AGE over 70	1.08e-20
A03AA	A03AA:age_over_70	0.449803	0.872996	0.515241	1.568	0.28315	8.68315	0.606	0	A03AA Synthetic anticholinergics, esters with tertiary amino group	A	p6m	AGE over 70	0.749
A10AE	A10AE	1.09264	0.899652	1.21451	2.98213	0.511093	17.4002	0.225	0	A10AE Insulins and analogues for injection, long-acting	A	p6m	AGE over 70	0.394
A10AE	age_over_70	0.805293	0.0829892	9.70359	2.23735	1.90139	2.63268	5.21e-22	-1	A10AE Insulins and analogues for injection, long-acting	A	p6m	AGE over 70	7.29e-21
A10AE	A10AE1:age_over_70	-0.930723	1.1333	-0.821251	0.394269	0.0427387	3.63716	0.412	0	A10AE Insulins and analogues for injection, long-acting	A	p6m	AGE over 70	0.618
A10BA	A10BA	-0.235821	0.23694	-0.995279	0.789922	0.496406	1.25699	0.32	0	A10BA Biguanides [DG:DG01684]	A	p6m	AGE over 70	0.53
A10BA	age_over_70	0.819526	0.0847547	9.66938	2.26942	1.92198	2.67967	7.22e-22	-1	A10BA Biguanides [DG:DG01684]	A	p6m	AGE over 70	7.58e-21
A10BA	A10BA1:age_over_70	-0.313789	0.320544	-0.978927	0.730673	0.389753	1.3698	0.328	0	A10BA Biguanides [DG:DG01684]	A	p6m	AGE over 70	0.53
B01AC	B01AC	-0.535842	0.237043	-2.26052	0.585176	0.367664	0.93137	0.0238	1	B01AC Platelet aggregation inhibitors excl. heparin	A	p6m	AGE over 70	0.0625
B01AC	age_over_70	0.765236	0.0869535	8.80052	2.1495	1.81259	2.54904	2.02e-18	-1	B01AC Platelet aggregation inhibitors excl. heparin	A	p6m	AGE over 70	6.06e-18
B01AC	B01AC1:age_over_70	0.525967	0.280998	1.87178	1.69209	0.975356	2.93553	0.0613	0	B01AC Platelet aggregation inhibitors excl. heparin	A	p6m	AGE over 70	0.143
C07AB	C07AB	-0.123365	0.214196	-0.575943	0.883941	0.580821	1.34526	0.565	0	C07AB Beta blocking agents, selective	A	p6m	AGE over 70	0.719
C07AB	age_over_70	0.782991	0.0864271	9.05956	2.18801	1.84697	2.59202	2.04e-19	-1	C07AB Beta blocking agents, selective	A	p6m	AGE over 70	7.14e-19
C07AB	C07AB1:age_over_70	0.216093	0.273002	0.791545	1.24122	0.726766	2.11983	0.429	0	C07AB Beta blocking agents, selective	A	p6m	AGE over 70	0.621
C08CA	C08CA	-0.214112	0.165671	-1.29239	0.807258	0.583376	1.11706	0.196	0	C08CA Dihydropyridine derivatives [DG:DG01928]	A	p6m	AGE over 70	0.358
C08CA	age_over_70	0.808257	0.0881073	9.17356	2.24399	1.88799	2.66712	7.3e-20	-1	C08CA Dihydropyridine derivatives [DG:DG01928]	A	p6m	AGE over 70	2.79e-19
C08CA	C08CA1:age_over_70	0.00412409	0.224475	0.0183721	1.00413	0.646632	1.55928	0.985	0	C08CA Dihydropyridine derivatives [DG:DG01928]	A	p6m	AGE over 70	0.985
C09AA	C09AA	-0.332494	0.169938	-1.95656	0.717133	0.513928	1.00068	0.0505	0	C09AA ACE inhibitors, plain [DG:DG01501]	A	p6m	AGE over 70	0.125
C09AA	age_over_70	0.812024	0.0875174	9.27842	2.25246	1.89731	2.67409	2.8e-20	-1	C09AA ACE inhibitors, plain [DG:DG01501]	A	p6m	AGE over 70	1.26e-19
C09AA	C09AA1:age_over_70	-0.108485	0.237507	-0.456767	0.897192	0.56319	1.42927	0.648	0	C09AA ACE inhibitors, plain [DG:DG01501]	A	p6m	AGE over 70	0.778
C09CA	C09CA	-0.335988	0.229718	-1.46261	0.714631	0.455495	1.12119	0.144	0	C09CA Angiotensin II receptor blockers, plain [DG:DG01495]	A	p6m	AGE over 70	0.318
C09CA	age_over_70	0.79776	0.0853959	9.3419	2.22056	1.87824	2.62527	1.56e-20	-1	C09CA Angiotensin II receptor blockers, plain [DG:DG01495]	A	p6m	AGE over 70	8.19e-20
C09CA	C09CA1:age_over_70	0.113069	0.30323	0.37288	1.11971	0.617893	2.02907	0.709	0	C09CA Angiotensin II receptor blockers, plain [DG:DG01495]	A	p6m	AGE over 70	0.807
C10AA	C10AA	-0.505575	0.136508	-3.70363	0.603159	0.461529	0.788251	0.000216	1	C10AA HMG CoA reductase inhibitors [DG:DG01660]	A	p6m	AGE over 70	0.000605
C10AA	age_over_70	0.901337	0.0972224	9.27088	2.46289	2.03547	2.98008	3e-20	-1	C10AA HMG CoA reductase inhibitors [DG:DG01660]	A	p6m	AGE over 70	1.26e-19
C10AA	C10AA1:age_over_70	-0.0640527	0.178714	-0.35841	0.937956	0.660713	1.33153	0.72	0	C10AA HMG CoA reductase inhibitors [DG:DG01660]	A	p6m	AGE over 70	0.807
G03CA	G03CA	-0.0833722	0.260906	-0.319548	0.920009	0.551617	1.53443	0.749	0	G03CA Natural and semisynthetic estrogens, plain	A	p6m	AGE over 70	0.807
G03CA	age_over_70	0.788595	0.0836777	9.42419	2.2003	1.86738	2.59258	7.28e-21	-1	G03CA Natural and semisynthetic estrogens, plain	A	p6m	AGE over 70	4.37e-20
G03CA	G03CA1:age_over_70	0.708792	0.513293	1.38087	2.03154	0.742626	5.55749	0.167	0	G03CA Natural and semisynthetic estrogens, plain	A	p6m	AGE over 70	0.319
G04CB	G04CB	-0.757909	0.910484	-0.832425	0.468645	0.078631	2.79315	0.405	0	G04CB Testosterone-5-alpha reductase inhibitors	A	p6m	AGE over 70	0.618
G04CB	age_over_70	0.799505	0.0834506	9.58057	2.22444	1.88871	2.61985	1.68e-21	-1	G04CB Testosterone-5-alpha reductase inhibitors	A	p6m	AGE over 70	1.18e-20
G04CB	G04CB1:age_over_70	0.707787	0.971802	0.728325	2.0295	0.301945	13.6411	0.467	0	G04CB Testosterone-5-alpha reductase inhibitors	A	p6m	AGE over 70	0.654
H03AA	H03AA	-0.0709322	0.20731	-0.342155	0.931525	0.620406	1.39866	0.732	0	H03AA Thyroid hormones	A	p6m	AGE over 70	0.807
H03AA	age_over_70	0.828705	0.0849016	9.76076	2.29035	1.93915	2.70516	3.01e-22	-1	H03AA Thyroid hormones	A	p6m	AGE over 70	7.29e-21
H03AA	H03AA1:age_over_70	-0.449197	0.316346	-1.41995	0.63814	0.343207	1.18652	0.156	0	H03AA Thyroid hormones	A	p6m	AGE over 70	0.319
R03BA	R03BA	-0.46909	0.337741	-1.38891	0.625571	0.322627	1.21298	0.165	0	R03BA Glucocorticoids	A	p6m	AGE over 70	0.319
R03BA	age_over_70	0.814017	0.0837056	9.72477	2.25696	1.91536	2.65948	4.25e-22	-1	R03BA Glucocorticoids	A	p6m	AGE over 70	7.29e-21
R03BA	R03BA1:age_over_70	-0.3068	0.492551	-0.62288	0.735798	0.280134	1.93264	0.533	0	R03BA Glucocorticoids	A	p6m	AGE over 70	0.719
A02BC	A02BC	0.903641	0.468167	1.93017	2.46857	0.985861	6.18126	0.0537	0	A02BC Proton pump inhibitors [DG:DG01646]	B	p6m	AGE over 70	0.125
A02BC	age_over_70	2.32823	0.325311	7.15692	10.2598	5.4218	19.4147	9.84e-13	-1	A02BC Proton pump inhibitors [DG:DG01646]	B	p6m	AGE over 70	2.95e-12
A02BC	A02BC1:age_over_70	-0.718905	0.513868	-1.39901	0.487285	0.177926	1.33452	0.162	0	A02BC Proton pump inhibitors [DG:DG01646]	B	p6m	AGE over 70	0.309
A03AA	A03AA	-12.6589	989.691	-0.0127908	3.17905e-06	0	Inf	0.99	0	A03AA Synthetic anticholinergics, esters with tertiary amino group	B	p6m	AGE over 70	0.999
A03AA	age_over_70	2.11374	0.265011	7.97605	8.27914	4.92421	13.9198	1.98e-15	-1	A03AA Synthetic anticholinergics, esters with tertiary amino group	B	p6m	AGE over 70	2.67e-14
A03AA	A03AA1:age_over_70	-2.31656	1522.65	-0.0015214	0.098612	0	Inf	0.999	0	A03AA Synthetic anticholinergics, esters with tertiary amino group	B	p6m	AGE over 70	0.999
A10AE	A10AE	1.68869	1.50423	1.12263	5.41237	0.28352	103.322	0.262	0	A10AE Insulins and analogues for injection, long-acting	B	p6m	AGE over 70	0.459
A10AE	age_over_70	2.12669	0.267696	7.94443	8.38708	4.96221	14.1757	2.54e-15	-1	A10AE Insulins and analogues for injection, long-acting	B	p6m	AGE over 70	2.67e-14
A10AE	A10AE1:age_over_70	-0.612341	1.68118	-0.364233	0.54208	0.0200719	14.6399	0.716	0	A10AE Insulins and analogues for injection, long-acting	B	p6m	AGE over 70	0.999
A10BA	A10BA	-0.407875	1.03451	-0.394267	0.665062	0.0874991	5.055	0.693	0	A10BA Biguanides [DG:DG01684]	B	p6m	AGE over 70	0.999
A10BA	age_over_70	2.11448	0.271593	7.78547	8.28526	4.86467	14.1111	8.87e-15	-1	A10BA Biguanides [DG:DG01684]	B	p6m	AGE over 70	6.21e-14
A10BA	A10BA1:age_over_70	-0.0203247	1.08438	-0.0187431	0.97988	0.116911	8.2128	0.985	0	A10BA Biguanides [DG:DG01684]	B	p6m	AGE over 70	0.999
B01AC	B01AC	0.242839	0.780289	0.311217	1.27486	0.276103	5.88649	0.756	0	B01AC Platelet aggregation inhibitors excl. heparin	B	p6m	AGE over 70	0.999
B01AC	age_over_70	2.11925	0.279423	7.58438	8.3249	4.81348	14.3979	4.17e-14	-1	B01AC Platelet aggregation inhibitors excl. heparin	B	p6m	AGE over 70	1.59e-13
B01AC	B01AC1:age_over_70	-0.131724	0.812796	-0.162063	0.876583	0.178123	4.31385	0.871	0	B01AC Platelet aggregation inhibitors excl. heparin	B	p6m	AGE over 70	0.999
C07AB	C07AB	1.42494	0.54322	2.62314	4.15762	1.43321	12.0609	0.00875	-1	C07AB Beta blocking agents, selective	B	p6m	AGE over 70	0.0245
C07AB	age_over_70	2.26496	0.298262	7.59387	9.63075	5.3666	17.2831	3.88e-14	-1	C07AB Beta blocking agents, selective	B	p6m	AGE over 70	1.59e-13
C07AB	C07AB1:age_over_70	-0.940544	0.59602	-1.57804	0.390415	0.121348	1.25609	0.115	0	C07AB Beta blocking agents, selective	B	p6m	AGE over 70	0.232
C08CA	C08CA	0.827095	0.525824	1.57295	2.28667	0.815604	6.411	0.116	0	C08CA Dihydropyridine derivatives [DG:DG01928]	B	p6m	AGE over 70	0.232
C08CA	age_over_70	2.30967	0.300332	7.69037	10.0711	5.58922	18.1468	1.85e-14	-1	C08CA Dihydropyridine derivatives [DG:DG01928]	B	p6m	AGE over 70	9.71e-14
C08CA	C08CA1:age_over_70	-1.02647	0.585812	-1.75222	0.358269	0.113608	1.12982	0.0798	0	C08CA Dihydropyridine derivatives [DG:DG01928]	B	p6m	AGE over 70	0.176
C09AA	C09AA	-0.165273	0.701219	-0.235694	0.847662	0.214366	3.35189	0.814	0	C09AA ACE inhibitors, plain [DG:DG01501]	B	p6m	AGE over 70	0.999
C09AA	age_over_70	2.10613	0.282235	7.46235	8.2164	4.72462	14.2888	1.05e-13	-1	C09AA ACE inhibitors, plain [DG:DG01501]	B	p6m	AGE over 70	3.67e-13
C09AA	C09AA1:age_over_70	0.0273552	0.751313	0.0364099	1.02773	0.235592	4.48333	0.971	0	C09AA ACE inhibitors, plain [DG:DG01501]	B	p6m	AGE over 70	0.999
C09CA	C09CA	-0.250841	0.981571	-0.25555	0.778146	0.113575	5.33139	0.798	0	C09CA Angiotensin II receptor blockers, plain [DG:DG01495]	B	p6m	AGE over 70	0.999
C09CA	age_over_70	2.08652	0.273697	7.62345	8.05682	4.71106	13.7787	3.09e-14	-1	C09CA Angiotensin II receptor blockers, plain [DG:DG01495]	B	p6m	AGE over 70	1.44e-13
C09CA	C09CA1:age_over_70	0.347456	1.02728	0.338229	1.41546	0.188885	10.6071	0.735	0	C09CA Angiotensin II receptor blockers, plain [DG:DG01495]	B	p6m	AGE over 70	0.999
C10AA	C10AA	0.908575	0.466144	1.94913	2.48078	0.994675	6.18724	0.0513	0	C10AA HMG CoA reductase inhibitors [DG:DG01660]	B	p6m	AGE over 70	0.125
C10AA	age_over_70	2.49068	0.33675	7.39624	12.0695	6.23675	23.3573	1.71e-13	-1	C10AA HMG CoA reductase inhibitors [DG:DG01660]	B	p6m	AGE over 70	5.52e-13
C10AA	C10AA1:age_over_70	-1.11139	0.507008	-2.19206	0.3291	0.121794	0.889264	0.0284	1	C10AA HMG CoA reductase inhibitors [DG:DG01660]	B	p6m	AGE over 70	0.0746
G03CA	G03CA	-13.311	665.515	-0.0200011	1.65612e-06	0	Inf	0.984	0	G03CA Natural and semisynthetic estrogens, plain	B	p6m	AGE over 70	0.999
G03CA	age_over_70	2.09061	0.26526	7.88137	8.08985	4.80928	13.6082	4.19e-15	-1	G03CA Natural and semisynthetic estrogens, plain	B	p6m	AGE over 70	3.52e-14
G03CA	G03CA1:age_over_70	13.0991	665.516	0.0196826	488501	0	Inf	0.984	0	G03CA Natural and semisynthetic estrogens, plain	B	p6m	AGE over 70	0.999
G04CB	G04CB	-13.4082	1403.82	-0.00955126	1.50273e-06	0	Inf	0.992	0	G04CB Testosterone-5-alpha reductase inhibitors	B	p6m	AGE over 70	0.999
G04CB	age_over_70	2.11716	0.265591	7.9715	8.30752	4.93546	13.9834	2.05e-15	-1	G04CB Testosterone-5-alpha reductase inhibitors	B	p6m	AGE over 70	2.67e-14
G04CB	G04CB1:age_over_70	12.9455	1403.82	0.00922166	418956	0	Inf	0.993	0	G04CB Testosterone-5-alpha reductase inhibitors	B	p6m	AGE over 70	0.999
H03AA	H03AA	0.846458	0.737154	1.14828	2.33137	0.549474	9.89184	0.251	0	H03AA Thyroid hormones	B	p6m	AGE over 70	0.458
H03AA	age_over_70	2.14207	0.278169	7.70061	8.51705	4.9367	14.694	1.71e-14	-1	H03AA Thyroid hormones	B	p6m	AGE over 70	9.71e-14
H03AA	H03AA1:age_over_70	-0.287058	0.818155	-0.350861	0.750468	0.150903	3.73222	0.726	0	H03AA Thyroid hormones	B	p6m	AGE over 70	0.999
R03BA	R03BA	-13.5905	794.113	-0.0171141	1.2523e-06	0	Inf	0.986	0	R03BA Glucocorticoids	B	p6m	AGE over 70	0.999
R03BA	age_over_70	2.10851	0.265098	7.95373	8.236	4.89771	13.8497	2.36e-15	-1	R03BA Glucocorticoids	B	p6m	AGE over 70	2.67e-14
R03BA	R03BA1:age_over_70	12.5418	794.114	0.0157934	279780	0	Inf	0.987	0	R03BA Glucocorticoids	B	p6m	AGE over 70	0.999
A02BC	A02BC	0.273102	0.104255	2.61956	1.31403	1.07118	1.61194	0.00881	-1	A02BC Proton pump inhibitors [DG:DG01646]	C	p6m	AGE over 70	0.0925
A02BC	age_over_70	-0.135657	0.072462	-1.87211	0.873142	0.757539	1.00639	0.0612	0	A02BC Proton pump inhibitors [DG:DG01646]	C	p6m	AGE over 70	0.171
A02BC	A02BC1:age_over_70	-0.0144229	0.137147	-0.105164	0.985681	0.753349	1.28966	0.916	0	A02BC Proton pump inhibitors [DG:DG01646]	C	p6m	AGE over 70	0.969
A03AA	A03AA	0.182561	0.484638	0.376696	1.20029	0.464258	3.10321	0.706	0	A03AA Synthetic anticholinergics, esters with tertiary amino group	C	p6m	AGE over 70	0.912
A03AA	age_over_70	-0.128401	0.0644848	-1.99119	0.8795	0.77508	0.997989	0.0465	1	A03AA Synthetic anticholinergics, esters with tertiary amino group	C	p6m	AGE over 70	0.171
A03AA	A03AA1:age_over_70	0.26614	0.637842	0.417251	1.30492	0.373809	4.5553	0.676	0	A03AA Synthetic anticholinergics, esters with tertiary amino group	C	p6m	AGE over 70	0.912
A10AE	A10AE	-0.0181739	0.459568	-0.0395456	0.98199	0.398953	2.41709	0.969	0	A10AE Insulins and analogues for injection, long-acting	C	p6m	AGE over 70	0.969
A10AE	age_over_70	-0.128617	0.0645199	-1.99345	0.87931	0.774859	0.997842	0.0462	1	A10AE Insulins and analogues for injection, long-acting	C	p6m	AGE over 70	0.171
A10AE	A10AE1:age_over_70	0.35053	0.610041	0.5746	1.41982	0.4295	4.69356	0.566	0	A10AE Insulins and analogues for injection, long-acting	C	p6m	AGE over 70	0.82
A10BA	A10BA	-0.0872808	0.184731	-0.472475	0.91642	0.638044	1.31625	0.637	0	A10BA Biguanides [DG:DG01684]	C	p6m	AGE over 70	0.892
A10BA	age_over_70	-0.127438	0.0659998	-1.93089	0.880348	0.773526	1.00192	0.0535	0	A10BA Biguanides [DG:DG01684]	C	p6m	AGE over 70	0.171
A10BA	A10BA1:age_over_70	0.0119626	0.236776	0.050523	1.01203	0.636283	1.60968	0.96	0	A10BA Biguanides [DG:DG01684]	C	p6m	AGE over 70	0.969
B01AC	B01AC	-0.375187	0.202682	-1.85111	0.687161	0.461886	1.02231	0.0641	0	B01AC Platelet aggregation inhibitors excl. heparin	C	p6m	AGE over 70	0.171
B01AC	age_over_70	-0.183631	0.0675585	-2.71811	0.832243	0.729027	0.950071	0.00657	1	B01AC Platelet aggregation inhibitors excl. heparin	C	p6m	AGE over 70	0.092
B01AC	B01AC1:age_over_70	0.613031	0.224646	2.72887	1.84602	1.18855	2.86718	0.00636	-1	B01AC Platelet aggregation inhibitors excl. heparin	C	p6m	AGE over 70	0.092
C07AB	C07AB	-0.0649137	0.179776	-0.361081	0.937148	0.658843	1.33301	0.718	0	C07AB Beta blocking agents, selective	C	p6m	AGE over 70	0.912
C07AB	age_over_70	-0.138169	0.0670756	-2.0599	0.870952	0.763658	0.99332	0.0394	1	C07AB Beta blocking agents, selective	C	p6m	AGE over 70	0.171
C07AB	C07AB1:age_over_70	0.124324	0.210245	0.591328	1.13238	0.749949	1.70984	0.554	0	C07AB Beta blocking agents, selective	C	p6m	AGE over 70	0.82
C08CA	C08CA	-0.0969587	0.13894	-0.697847	0.907594	0.691234	1.19167	0.485	0	C08CA Dihydropyridine derivatives [DG:DG01928]	C	p6m	AGE over 70	0.783
C08CA	age_over_70	-0.13049	0.0682867	-1.91091	0.877665	0.76772	1.00336	0.056	0	C08CA Dihydropyridine derivatives [DG:DG01928]	C	p6m	AGE over 70	0.171
C08CA	C08CA1:age_over_70	0.0484159	0.175689	0.275577	1.04961	0.74384	1.48106	0.783	0	C08CA Dihydropyridine derivatives [DG:DG01928]	C	p6m	AGE over 70	0.94
C09AA	C09AA	-0.256146	0.145236	-1.76366	0.774029	0.58228	1.02892	0.0778	0	C09AA ACE inhibitors, plain [DG:DG01501]	C	p6m	AGE over 70	0.184
C09AA	age_over_70	-0.11861	0.0674808	-1.75768	0.888154	0.778123	1.01374	0.0788	0	C09AA ACE inhibitors, plain [DG:DG01501]	C	p6m	AGE over 70	0.184
C09AA	C09AA1:age_over_70	-0.0630326	0.18831	-0.334728	0.938913	0.649135	1.35805	0.738	0	C09AA ACE inhibitors, plain [DG:DG01501]	C	p6m	AGE over 70	0.912
C09CA	C09CA	-0.173378	0.193718	-0.895001	0.84082	0.575187	1.22913	0.371	0	C09CA Angiotensin II receptor blockers, plain [DG:DG01495]	C	p6m	AGE over 70	0.623
C09CA	age_over_70	-0.128184	0.0661099	-1.93895	0.879692	0.772783	1.00139	0.0525	0	C09CA Angiotensin II receptor blockers, plain [DG:DG01495]	C	p6m	AGE over 70	0.171
C09CA	C09CA1:age_over_70	0.0509151	0.240125	0.212036	1.05223	0.657229	1.68464	0.832	0	C09CA Angiotensin II receptor blockers, plain [DG:DG01495]	C	p6m	AGE over 70	0.968
C10AA	C10AA	-0.367183	0.115606	-3.17615	0.692683	0.552243	0.868839	0.00149	1	C10AA HMG CoA reductase inhibitors [DG:DG01660]	C	p6m	AGE over 70	0.0626
C10AA	age_over_70	-0.135448	0.0734834	-1.84325	0.873324	0.756182	1.00861	0.0653	0	C10AA HMG CoA reductase inhibitors [DG:DG01660]	C	p6m	AGE over 70	0.171
C10AA	C10AA1:age_over_70	0.16761	0.142478	1.1764	1.18248	0.894365	1.5634	0.239	0	C10AA HMG CoA reductase inhibitors [DG:DG01660]	C	p6m	AGE over 70	0.429
G03CA	G03CA	0.276337	0.230352	1.19963	1.31829	0.839334	2.07056	0.23	0	G03CA Natural and semisynthetic estrogens, plain	C	p6m	AGE over 70	0.429
G03CA	age_over_70	-0.124714	0.0650075	-1.91846	0.882749	0.777146	1.0027	0.0551	0	G03CA Natural and semisynthetic estrogens, plain	C	p6m	AGE over 70	0.171
G03CA	G03CA1:age_over_70	0.0686211	0.37	0.185462	1.07103	0.518628	2.21181	0.853	0	G03CA Natural and semisynthetic estrogens, plain	C	p6m	AGE over 70	0.968
G04CB	G04CB	-1.01842	0.783583	-1.29969	0.361166	0.077753	1.67763	0.194	0	G04CB Testosterone-5-alpha reductase inhibitors	C	p6m	AGE over 70	0.388
G04CB	age_over_70	-0.130183	0.0646999	-2.01211	0.877935	0.773374	0.996632	0.0442	1	G04CB Testosterone-5-alpha reductase inhibitors	C	p6m	AGE over 70	0.171
G04CB	G04CB1:age_over_70	0.952742	0.818848	1.16351	2.59281	0.520911	12.9056	0.245	0	G04CB Testosterone-5-alpha reductase inhibitors	C	p6m	AGE over 70	0.429
H03AA	H03AA	-0.022835	0.177252	-0.128828	0.977424	0.690566	1.38344	0.897	0	H03AA Thyroid hormones	C	p6m	AGE over 70	0.969
H03AA	age_over_70	-0.105275	0.0657192	-1.60189	0.900077	0.791296	1.02381	0.109	0	H03AA Thyroid hormones	C	p6m	AGE over 70	0.241
H03AA	H03AA1:age_over_70	-0.35789	0.257067	-1.3922	0.69915	0.422429	1.15714	0.164	0	H03AA Thyroid hormones	C	p6m	AGE over 70	0.344
R03BA	R03BA	0.171799	0.288088	0.596342	1.18744	0.675134	2.08849	0.551	0	R03BA Glucocorticoids	C	p6m	AGE over 70	0.82
R03BA	age_over_70	-0.127104	0.0648082	-1.96124	0.880642	0.775594	0.999918	0.0498	1	R03BA Glucocorticoids	C	p6m	AGE over 70	0.171
R03BA	R03BA1:age_over_70	0.0165486	0.407859	0.0405742	1.01669	0.457105	2.2613	0.968	0	R03BA Glucocorticoids	C	p6m	AGE over 70	0.969
A02BC	A02BC	1.07329	0.467132	2.29762	2.925	1.17085	7.30718	0.0216	-1	A02BC Proton pump inhibitors [DG:DG01646]	D	p6m	AGE over 70	0.0567
A02BC	age_over_70	1.6173	0.317863	5.08806	5.03949	2.70284	9.3962	3.62e-07	-1	A02BC Proton pump inhibitors [DG:DG01646]	D	p6m	AGE over 70	1.09e-06
A02BC	A02BC1:age_over_70	-0.679451	0.503509	-1.34943	0.506895	0.188942	1.3599	0.177	0	A02BC Proton pump inhibitors [DG:DG01646]	D	p6m	AGE over 70	0.338
A03AA	A03AA	-12.5493	904.448	-0.013875	3.54754e-06	0	Inf	0.989	0	A03AA Synthetic anticholinergics, esters with tertiary amino group	D	p6m	AGE over 70	0.999
A03AA	age_over_70	1.42391	0.256599	5.54917	4.15334	2.51177	6.86777	2.87e-08	-1	A03AA Synthetic anticholinergics, esters with tertiary amino group	D	p6m	AGE over 70	2.66e-07
A03AA	A03AA1:age_over_70	-1.63629	1207.55	-0.00135505	0.194701	0	Inf	0.999	0	A03AA Synthetic anticholinergics, esters with tertiary amino group	D	p6m	AGE over 70	0.999
A10AE	A10AE	0.800195	1.40667	0.568856	2.22598	0.141304	35.0661	0.57	0	A10AE Insulins and analogues for injection, long-acting	D	p6m	AGE over 70	0.958
A10AE	age_over_70	1.43171	0.259671	5.51353	4.18584	2.51622	6.96331	3.52e-08	-1	A10AE Insulins and analogues for injection, long-acting	D	p6m	AGE over 70	2.66e-07
A10AE	A10AE1:age_over_70	0.121331	1.51283	0.0802012	1.129	0.0582058	21.8988	0.936	0	A10AE Insulins and analogues for injection, long-acting	D	p6m	AGE over 70	0.999
A10BA	A10BA	-0.524906	1.02093	-0.514146	0.591611	0.0799871	4.37576	0.607	0	A10BA Biguanides [DG:DG01684]	D	p6m	AGE over 70	0.981
A10BA	age_over_70	1.40383	0.263405	5.32956	4.07077	2.42921	6.82162	9.85e-08	-1	A10BA Biguanides [DG:DG01684]	D	p6m	AGE over 70	4.14e-07
A10BA	A10BA1:age_over_70	0.31853	1.06446	0.299241	1.3751	0.170712	11.0766	0.765	0	A10BA Biguanides [DG:DG01684]	D	p6m	AGE over 70	0.999
B01AC	B01AC	0.113668	0.773896	0.146878	1.12038	0.245823	5.10633	0.883	0	B01AC Platelet aggregation inhibitors excl. heparin	D	p6m	AGE over 70	0.999
B01AC	age_over_70	1.39542	0.27104	5.14839	4.03667	2.37308	6.86648	2.63e-07	-1	B01AC Platelet aggregation inhibitors excl. heparin	D	p6m	AGE over 70	8.5e-07
B01AC	B01AC1:age_over_70	0.168738	0.797014	0.211713	1.18381	0.248234	5.64551	0.832	0	B01AC Platelet aggregation inhibitors excl. heparin	D	p6m	AGE over 70	0.999
C07AB	C07AB	1.30367	0.536716	2.42898	3.68279	1.28624	10.5447	0.0151	-1	C07AB Beta blocking agents, selective	D	p6m	AGE over 70	0.0423
C07AB	age_over_70	1.58632	0.289797	5.47388	4.88572	2.76855	8.62195	4.41e-08	-1	C07AB Beta blocking agents, selective	D	p6m	AGE over 70	2.66e-07
C07AB	C07AB1:age_over_70	-0.969924	0.572775	-1.69338	0.379112	0.123373	1.16497	0.0904	0	C07AB Beta blocking agents, selective	D	p6m	AGE over 70	0.2
C08CA	C08CA	0.767337	0.51734	1.48323	2.15402	0.781426	5.93762	0.138	0	C08CA Dihydropyridine derivatives [DG:DG01928]	D	p6m	AGE over 70	0.276
C08CA	age_over_70	1.62109	0.292359	5.54485	5.05858	2.85215	8.97192	2.94e-08	-1	C08CA Dihydropyridine derivatives [DG:DG01928]	D	p6m	AGE over 70	2.66e-07
C08CA	C08CA1:age_over_70	-1.00602	0.568502	-1.76961	0.36567	0.119999	1.11429	0.0768	0	C08CA Dihydropyridine derivatives [DG:DG01928]	D	p6m	AGE over 70	0.179
C09AA	C09AA	-0.297823	0.696917	-0.427343	0.742433	0.189425	2.90989	0.669	0	C09AA ACE inhibitors, plain [DG:DG01501]	D	p6m	AGE over 70	0.999
C09AA	age_over_70	1.43144	0.27303	5.2428	4.18471	2.45054	7.14611	1.58e-07	-1	C09AA ACE inhibitors, plain [DG:DG01501]	D	p6m	AGE over 70	5.53e-07
C09AA	C09AA1:age_over_70	-0.0507646	0.738647	-0.0687265	0.950502	0.223467	4.04289	0.945	0	C09AA ACE inhibitors, plain [DG:DG01501]	D	p6m	AGE over 70	0.999
C09CA	C09CA	-0.295208	0.973807	-0.303148	0.744377	0.110379	5.01997	0.762	0	C09CA Angiotensin II receptor blockers, plain [DG:DG01495]	D	p6m	AGE over 70	0.999
C09CA	age_over_70	1.39936	0.264942	5.28176	4.0526	2.41109	6.81166	1.28e-07	-1	C09CA Angiotensin II receptor blockers, plain [DG:DG01495]	D	p6m	AGE over 70	4.89e-07
C09CA	C09CA1:age_over_70	0.341969	1.01158	0.338055	1.40772	0.193845	10.2229	0.735	0	C09CA Angiotensin II receptor blockers, plain [DG:DG01495]	D	p6m	AGE over 70	0.999
C10AA	C10AA	0.766666	0.463026	1.65577	2.15258	0.868618	5.33444	0.0978	0	C10AA HMG CoA reductase inhibitors [DG:DG01660]	D	p6m	AGE over 70	0.205
C10AA	age_over_70	1.76192	0.32785	5.37416	5.82359	3.06284	11.0728	7.7e-08	-1	C10AA HMG CoA reductase inhibitors [DG:DG01660]	D	p6m	AGE over 70	3.59e-07
C10AA	C10AA1:age_over_70	-0.969015	0.496369	-1.95221	0.379457	0.143434	1.00386	0.0509	0	C10AA HMG CoA reductase inhibitors [DG:DG01660]	D	p6m	AGE over 70	0.126
G03CA	G03CA	-11.8796	369.975	-0.0321091	6.93051e-06	0	Inf	0.974	0	G03CA Natural and semisynthetic estrogens, plain	D	p6m	AGE over 70	0.999
G03CA	age_over_70	1.40559	0.256833	5.4728	4.07795	2.46504	6.74619	4.43e-08	-1	G03CA Natural and semisynthetic estrogens, plain	D	p6m	AGE over 70	2.66e-07
G03CA	G03CA1:age_over_70	11.8037	369.976	0.0319041	133753	0	Inf	0.975	0	G03CA Natural and semisynthetic estrogens, plain	D	p6m	AGE over 70	0.999
G04CB	G04CB	-12.9785	869.453	-0.0149273	2.30935e-06	0	Inf	0.988	0	G04CB Testosterone-5-alpha reductase inhibitors	D	p6m	AGE over 70	0.999
G04CB	age_over_70	1.42597	0.257083	5.54672	4.16188	2.51455	6.88842	2.91e-08	-1	G04CB Testosterone-5-alpha reductase inhibitors	D	p6m	AGE over 70	2.66e-07
G04CB	G04CB1:age_over_70	12.5499	869.453	0.0144342	282053	0	Inf	0.989	0	G04CB Testosterone-5-alpha reductase inhibitors	D	p6m	AGE over 70	0.999
H03AA	H03AA	0.806505	0.726808	1.10965	2.24007	0.539012	9.30943	0.267	0	H03AA Thyroid hormones	D	p6m	AGE over 70	0.488
H03AA	age_over_70	1.46148	0.269793	5.41704	4.31233	2.54134	7.31747	6.06e-08	-1	H03AA Thyroid hormones	D	p6m	AGE over 70	3.18e-07
H03AA	H03AA1:age_over_70	-0.454573	0.791833	-0.574077	0.634719	0.134453	2.99635	0.566	0	H03AA Thyroid hormones	D	p6m	AGE over 70	0.958
R03BA	R03BA	-12.0764	495.48	-0.0243731	5.69251e-06	0	Inf	0.981	0	R03BA Glucocorticoids	D	p6m	AGE over 70	0.999
R03BA	age_over_70	1.41416	0.256786	5.50714	4.11302	2.48647	6.80359	3.65e-08	-1	R03BA Glucocorticoids	D	p6m	AGE over 70	2.66e-07
R03BA	R03BA1:age_over_70	11.8411	495.481	0.0238982	138842	0	Inf	0.981	0	R03BA Glucocorticoids	D	p6m	AGE over 70	0.999
A02BC	A02BC	0.319761	0.0521506	6.13148	1.3768	1.24302	1.52497	8.71e-10	-1	A02BC Proton pump inhibitors [DG:DG01646]	E	p6m	AGE over 70	2.44e-09
A02BC	age_over_70	-0.76026	0.0418581	-18.1628	0.467545	0.430718	0.50752	1.09e-73	1	A02BC Proton pump inhibitors [DG:DG01646]	E	p6m	AGE over 70	3.52e-73
A02BC	A02BC1:age_over_70	0.0512672	0.0802249	0.639043	1.0526	0.899451	1.23184	0.523	0	A02BC Proton pump inhibitors [DG:DG01646]	E	p6m	AGE over 70	0.732
A03AA	A03AA	0.177643	0.257716	0.689298	1.1944	0.720744	1.97933	0.491	0	A03AA Synthetic anticholinergics, esters with tertiary amino group	E	p6m	AGE over 70	0.731
A03AA	age_over_70	-0.731818	0.0370434	-19.7557	0.481034	0.447346	0.517258	7.89e-87	1	A03AA Synthetic anticholinergics, esters with tertiary amino group	E	p6m	AGE over 70	1.2e-85
A03AA	A03AA1:age_over_70	0.169688	0.405477	0.418491	1.18494	0.535243	2.62324	0.676	0	A03AA Synthetic anticholinergics, esters with tertiary amino group	E	p6m	AGE over 70	0.789
A10AE	A10AE	-0.69684	0.386578	-1.80259	0.498157	0.233512	1.06273	0.0714	0	A10AE Insulins and analogues for injection, long-acting	E	p6m	AGE over 70	0.127
A10AE	age_over_70	-0.736438	0.0370333	-19.8858	0.478816	0.445293	0.514863	5.96e-88	1	A10AE Insulins and analogues for injection, long-acting	E	p6m	AGE over 70	2.5e-86
A10AE	A10AE1:age_over_70	1.12922	0.500945	2.25418	3.09325	1.1588	8.25697	0.0242	-1	A10AE Insulins and analogues for injection, long-acting	E	p6m	AGE over 70	0.0508
A10BA	A10BA	0.00228918	0.106293	0.0215365	1.00229	0.813798	1.23444	0.983	0	A10BA Biguanides [DG:DG01684]	E	p6m	AGE over 70	0.983
A10BA	age_over_70	-0.744696	0.0378398	-19.6802	0.474879	0.440934	0.511437	3.5e-86	1	A10BA Biguanides [DG:DG01684]	E	p6m	AGE over 70	2.94e-85
A10BA	A10BA1:age_over_70	0.267431	0.149068	1.79402	1.3066	0.975565	1.74997	0.0728	0	A10BA Biguanides [DG:DG01684]	E	p6m	AGE over 70	0.127
B01AC	B01AC	0.0436168	0.096506	0.45196	1.04458	0.864562	1.26209	0.651	0	B01AC Platelet aggregation inhibitors excl. heparin	E	p6m	AGE over 70	0.784
B01AC	age_over_70	-0.763761	0.0388753	-19.6464	0.465911	0.43173	0.502798	6.81e-86	1	B01AC Platelet aggregation inhibitors excl. heparin	E	p6m	AGE over 70	4.77e-85
B01AC	B01AC1:age_over_70	0.274554	0.120423	2.27992	1.31594	1.03928	1.66626	0.0226	-1	B01AC Platelet aggregation inhibitors excl. heparin	E	p6m	AGE over 70	0.05
C07AB	C07AB	0.0701264	0.0934862	0.750126	1.07264	0.893058	1.28834	0.453	0	C07AB Beta blocking agents, selective	E	p6m	AGE over 70	0.705
C07AB	age_over_70	-0.735312	0.0384975	-19.1003	0.479356	0.444517	0.516924	2.73e-81	1	C07AB Beta blocking agents, selective	E	p6m	AGE over 70	1.15e-80
C07AB	C07AB1:age_over_70	0.0246111	0.123213	0.199745	1.02492	0.805025	1.30487	0.842	0	C07AB Beta blocking agents, selective	E	p6m	AGE over 70	0.884
C08CA	C08CA	0.0419997	0.0697659	0.602009	1.04289	0.90961	1.19571	0.547	0	C08CA Dihydropyridine derivatives [DG:DG01928]	E	p6m	AGE over 70	0.741
C08CA	age_over_70	-0.742399	0.0394579	-18.8149	0.475971	0.440548	0.514241	6.17e-79	1	C08CA Dihydropyridine derivatives [DG:DG01928]	E	p6m	AGE over 70	2.36e-78
C08CA	C08CA1:age_over_70	0.0671718	0.100665	0.667278	1.06948	0.877982	1.30274	0.505	0	C08CA Dihydropyridine derivatives [DG:DG01928]	E	p6m	AGE over 70	0.731
C09AA	C09AA	-0.0168847	0.0709031	-0.238138	0.983257	0.855685	1.12985	0.812	0	C09AA ACE inhibitors, plain [DG:DG01501]	E	p6m	AGE over 70	0.874
C09AA	age_over_70	-0.727496	0.0390028	-18.6524	0.483117	0.447562	0.521497	1.3e-77	1	C09AA ACE inhibitors, plain [DG:DG01501]	E	p6m	AGE over 70	4.55e-77
C09AA	C09AA1:age_over_70	-0.0261241	0.105879	-0.246734	0.974214	0.791643	1.19889	0.805	0	C09AA ACE inhibitors, plain [DG:DG01501]	E	p6m	AGE over 70	0.874
C09CA	C09CA	0.0429456	0.0954173	0.450082	1.04388	0.865828	1.25855	0.653	0	C09CA Angiotensin II receptor blockers, plain [DG:DG01495]	E	p6m	AGE over 70	0.784
C09CA	age_over_70	-0.731965	0.0380934	-19.215	0.480963	0.446361	0.518247	3.02e-82	1	C09CA Angiotensin II receptor blockers, plain [DG:DG01495]	E	p6m	AGE over 70	1.59e-81
C09CA	C09CA1:age_over_70	0.00936746	0.135418	0.0691742	1.00941	0.774105	1.31625	0.945	0	C09CA Angiotensin II receptor blockers, plain [DG:DG01495]	E	p6m	AGE over 70	0.968
C10AA	C10AA	-0.0294195	0.0551677	-0.533273	0.971009	0.871494	1.08189	0.594	0	C10AA HMG CoA reductase inhibitors [DG:DG01660]	E	p6m	AGE over 70	0.78
C10AA	age_over_70	-0.7944	0.0440481	-18.0348	0.451852	0.414479	0.492595	1.11e-72	1	C10AA HMG CoA reductase inhibitors [DG:DG01660]	E	p6m	AGE over 70	3.33e-72
C10AA	C10AA1:age_over_70	0.193798	0.078286	2.47551	1.21385	1.04119	1.41515	0.0133	-1	C10AA HMG CoA reductase inhibitors [DG:DG01660]	E	p6m	AGE over 70	0.031
G03CA	G03CA	0.310815	0.102963	3.0187	1.36454	1.11517	1.66966	0.00254	-1	G03CA Natural and semisynthetic estrogens, plain	E	p6m	AGE over 70	0.00628
G03CA	age_over_70	-0.720466	0.0373173	-19.3065	0.486525	0.452211	0.523444	5.17e-83	1	G03CA Natural and semisynthetic estrogens, plain	E	p6m	AGE over 70	3.1e-82
G03CA	G03CA1:age_over_70	-0.309769	0.240149	-1.2899	0.733616	0.458198	1.17459	0.197	0	G03CA Natural and semisynthetic estrogens, plain	E	p6m	AGE over 70	0.331
G04CB	G04CB	-0.7306	0.365227	-2.0004	0.48162	0.235408	0.985342	0.0455	1	G04CB Testosterone-5-alpha reductase inhibitors	E	p6m	AGE over 70	0.091
G04CB	age_over_70	-0.735024	0.0372405	-19.7372	0.479494	0.445742	0.515801	1.14e-86	1	G04CB Testosterone-5-alpha reductase inhibitors	E	p6m	AGE over 70	1.2e-85
G04CB	G04CB1:age_over_70	0.750495	0.400926	1.87191	2.11805	0.965309	4.64735	0.0612	0	G04CB Testosterone-5-alpha reductase inhibitors	E	p6m	AGE over 70	0.117
H03AA	H03AA	0.0239236	0.0854693	0.279909	1.02421	0.86624	1.21099	0.779	0	H03AA Thyroid hormones	E	p6m	AGE over 70	0.874
H03AA	age_over_70	-0.726484	0.037981	-19.1276	0.483606	0.448913	0.52098	1.62e-81	1	H03AA Thyroid hormones	E	p6m	AGE over 70	7.56e-81
H03AA	H03AA1:age_over_70	-0.0661832	0.139332	-0.475002	0.935959	0.71229	1.22986	0.635	0	H03AA Thyroid hormones	E	p6m	AGE over 70	0.784
R03BA	R03BA	0.407647	0.129364	3.15118	1.50328	1.16661	1.93711	0.00163	-1	R03BA Glucocorticoids	E	p6m	AGE over 70	0.00428
R03BA	age_over_70	-0.738259	0.0373913	-19.7441	0.477945	0.444171	0.514287	9.92e-87	1	R03BA Glucocorticoids	E	p6m	AGE over 70	1.2e-85
R03BA	R03BA1:age_over_70	0.240063	0.205633	1.16743	1.27133	0.849614	1.90236	0.243	0	R03BA Glucocorticoids	E	p6m	AGE over 70	0.393
A02BC	A02BC	-0.439519	0.0556217	-7.90193	0.644346	0.577793	0.718566	2.84e-15	1	A02BC Proton pump inhibitors [DG:DG01646]	F	p6m	AGE over 70	7.95e-15
A02BC	age_over_70	-0.871807	0.0447075	-19.5002	0.418195	0.383109	0.456495	3.52e-84	1	A02BC Proton pump inhibitors [DG:DG01646]	F	p6m	AGE over 70	1.14e-83
A02BC	A02BC1:age_over_70	0.192218	0.0845353	2.27381	1.21193	1.02688	1.43034	0.023	-1	A02BC Proton pump inhibitors [DG:DG01646]	F	p6m	AGE over 70	0.0342
A03AA	A03AA	-0.47441	0.272642	-1.74005	0.622252	0.364656	1.06181	0.0819	0	A03AA Synthetic anticholinergics, esters with tertiary amino group	F	p6m	AGE over 70	0.0983
A03AA	age_over_70	-0.844485	0.0392536	-21.5136	0.429779	0.397952	0.46415	6.54e-102	1	A03AA Synthetic anticholinergics, esters with tertiary amino group	F	p6m	AGE over 70	9.16e-101
A03AA	A03AA1:age_over_70	0.153029	0.421795	0.362805	1.16536	0.509816	2.66383	0.717	0	A03AA Synthetic anticholinergics, esters with tertiary amino group	F	p6m	AGE over 70	0.717
A10AE	A10AE	-1.15745	0.400794	-2.88789	0.314287	0.14327	0.689439	0.00388	1	A10AE Insulins and analogues for injection, long-acting	F	p6m	AGE over 70	0.00652
A10AE	age_over_70	-0.851799	0.0392489	-21.7025	0.426647	0.395056	0.460764	1.16e-103	1	A10AE Insulins and analogues for injection, long-acting	F	p6m	AGE over 70	4.87e-102
A10AE	A10AE1:age_over_70	1.17461	0.521819	2.25098	3.23686	1.16395	9.00151	0.0244	-1	A10AE Insulins and analogues for injection, long-acting	F	p6m	AGE over 70	0.0342
A10BA	A10BA	-0.102107	0.116679	-0.875113	0.902933	0.718347	1.13495	0.382	0	A10BA Biguanides [DG:DG01684]	F	p6m	AGE over 70	0.422
A10BA	age_over_70	-0.859218	0.0400521	-21.4525	0.423493	0.391519	0.458079	2.39e-101	1	A10BA Biguanides [DG:DG01684]	F	p6m	AGE over 70	2.51e-100
A10BA	A10BA1:age_over_70	0.302215	0.160312	1.88516	1.35285	0.988068	1.85231	0.0594	0	A10BA Biguanides [DG:DG01684]	F	p6m	AGE over 70	0.0734
B01AC	B01AC	-0.432789	0.102317	-4.22988	0.648698	0.530819	0.792753	2.35e-05	1	B01AC Platelet aggregation inhibitors excl. heparin	F	p6m	AGE over 70	5.81e-05
B01AC	age_over_70	-0.880543	0.0411975	-21.3737	0.414558	0.382399	0.449421	1.27e-100	1	B01AC Platelet aggregation inhibitors excl. heparin	F	p6m	AGE over 70	8.89e-100
B01AC	B01AC1:age_over_70	0.464292	0.127802	3.6329	1.59089	1.23837	2.04376	0.000281	-1	B01AC Platelet aggregation inhibitors excl. heparin	F	p6m	AGE over 70	0.000621
C07AB	C07AB	-0.402335	0.0991236	-4.05892	0.668757	0.550669	0.812168	4.94e-05	1	C07AB Beta blocking agents, selective	F	p6m	AGE over 70	0.000115
C07AB	age_over_70	-0.854498	0.0408654	-20.9101	0.425497	0.392744	0.46098	2.03e-96	1	C07AB Beta blocking agents, selective	F	p6m	AGE over 70	8.53e-96
C07AB	C07AB1:age_over_70	0.219763	0.130378	1.68558	1.24578	0.964849	1.60851	0.0919	0	C07AB Beta blocking agents, selective	F	p6m	AGE over 70	0.107
C08CA	C08CA	-0.247349	0.0752306	-3.28788	0.780868	0.673812	0.904933	0.00101	1	C08CA Dihydropyridine derivatives [DG:DG01928]	F	p6m	AGE over 70	0.00199
C08CA	age_over_70	-0.872595	0.0418675	-20.8418	0.417866	0.384944	0.453603	8.3e-96	1	C08CA Dihydropyridine derivatives [DG:DG01928]	F	p6m	AGE over 70	3.17e-95
C08CA	C08CA1:age_over_70	0.241079	0.106872	2.25577	1.27262	1.03211	1.56918	0.0241	-1	C08CA Dihydropyridine derivatives [DG:DG01928]	F	p6m	AGE over 70	0.0342
C09AA	C09AA	-0.200966	0.0763351	-2.63268	0.81794	0.704276	0.94995	0.00848	1	C09AA ACE inhibitors, plain [DG:DG01501]	F	p6m	AGE over 70	0.0137
C09AA	age_over_70	-0.85188	0.0413671	-20.5932	0.426612	0.393387	0.462643	1.35e-93	1	C09AA ACE inhibitors, plain [DG:DG01501]	F	p6m	AGE over 70	4.72e-93
C09AA	C09AA1:age_over_70	0.0731561	0.112202	0.652004	1.0759	0.863497	1.34055	0.514	0	C09AA ACE inhibitors, plain [DG:DG01501]	F	p6m	AGE over 70	0.527
C09CA	C09CA	-0.261751	0.103042	-2.54023	0.769703	0.628941	0.941968	0.0111	1	C09CA Angiotensin II receptor blockers, plain [DG:DG01495]	F	p6m	AGE over 70	0.0173
C09CA	age_over_70	-0.852529	0.0404216	-21.0909	0.426335	0.393861	0.461487	4.76e-98	1	C09CA Angiotensin II receptor blockers, plain [DG:DG01495]	F	p6m	AGE over 70	2.22e-97
C09CA	C09CA1:age_over_70	0.155956	0.143508	1.08674	1.16877	0.88221	1.54842	0.277	0	C09CA Angiotensin II receptor blockers, plain [DG:DG01495]	F	p6m	AGE over 70	0.314
C10AA	C10AA	-0.262568	0.059865	-4.386	0.769074	0.683926	0.864824	1.16e-05	1	C10AA HMG CoA reductase inhibitors [DG:DG01660]	F	p6m	AGE over 70	3.05e-05
C10AA	age_over_70	-0.904314	0.0466766	-19.374	0.40482	0.369427	0.443603	4e-83	1	C10AA HMG CoA reductase inhibitors [DG:DG01660]	F	p6m	AGE over 70	1.2e-82
C10AA	C10AA1:age_over_70	0.27338	0.0833245	3.28091	1.3144	1.11635	1.54759	0.00104	-1	C10AA HMG CoA reductase inhibitors [DG:DG01660]	F	p6m	AGE over 70	0.00199
G03CA	G03CA	-0.368083	0.109259	-3.36891	0.692059	0.558648	0.857331	0.000756	1	G03CA Natural and semisynthetic estrogens, plain	F	p6m	AGE over 70	0.00159
G03CA	age_over_70	-0.846103	0.0395503	-21.3931	0.429084	0.397078	0.46367	8.41e-101	1	G03CA Natural and semisynthetic estrogens, plain	F	p6m	AGE over 70	7.06e-100
G03CA	G03CA1:age_over_70	-0.206327	0.247012	-0.835293	0.813567	0.501335	1.32026	0.404	0	G03CA Natural and semisynthetic estrogens, plain	F	p6m	AGE over 70	0.435
G04CB	G04CB	-1.22413	0.376948	-3.24747	0.294014	0.140442	0.615517	0.00117	1	G04CB Testosterone-5-alpha reductase inhibitors	F	p6m	AGE over 70	0.00214
G04CB	age_over_70	-0.840758	0.0394583	-21.3075	0.431383	0.399278	0.466071	5.1e-100	1	G04CB Testosterone-5-alpha reductase inhibitors	F	p6m	AGE over 70	3.06e-99
G04CB	G04CB1:age_over_70	0.869412	0.41382	2.10094	2.38551	1.06004	5.36832	0.0357	-1	G04CB Testosterone-5-alpha reductase inhibitors	F	p6m	AGE over 70	0.0469
H03AA	H03AA	-0.279833	0.0916675	-3.0527	0.75591	0.631596	0.904691	0.00227	1	H03AA Thyroid hormones	F	p6m	AGE over 70	0.00397
H03AA	age_over_70	-0.850372	0.0402687	-21.1174	0.427256	0.39483	0.462345	2.74e-98	1	H03AA Thyroid hormones	F	p6m	AGE over 70	1.44e-97
H03AA	H03AA1:age_over_70	0.109283	0.146458	0.746177	1.11548	0.837127	1.48638	0.456	0	H03AA Thyroid hormones	F	p6m	AGE over 70	0.479
R03BA	R03BA	-0.292678	0.138416	-2.11448	0.746262	0.56894	0.97885	0.0345	1	R03BA Glucocorticoids	F	p6m	AGE over 70	0.0467
R03BA	age_over_70	-0.855708	0.0396161	-21.6	0.424982	0.393231	0.459297	1.04e-102	1	R03BA Glucocorticoids	F	p6m	AGE over 70	2.18e-101
R03BA	R03BA1:age_over_70	0.443179	0.216979	2.0425	1.55765	1.01805	2.38325	0.0411	-1	R03BA Glucocorticoids	F	p6m	AGE over 70	0.0523
A02BC	A02BC	-0.43586	0.10578	-4.12046	0.646708	0.525611	0.795705	3.79e-05	1	A02BC Proton pump inhibitors [DG:DG01646]	G	p6m	AGE over 70	0.000531
A02BC	age_over_70	-0.254956	0.0743954	-3.42704	0.774951	0.669801	0.896607	0.000611	1	A02BC Proton pump inhibitors [DG:DG01646]	G	p6m	AGE over 70	0.00158
A02BC	A02BC1:age_over_70	0.126675	0.140348	0.902583	1.13505	0.862075	1.49446	0.367	0	A02BC Proton pump inhibitors [DG:DG01646]	G	p6m	AGE over 70	0.467
A03AA	A03AA	-0.380575	0.494122	-0.770204	0.683468	0.259479	1.80026	0.441	0	A03AA Synthetic anticholinergics, esters with tertiary amino group	G	p6m	AGE over 70	0.516
A03AA	age_over_70	-0.24413	0.0656648	-3.71783	0.783386	0.688778	0.890988	0.000201	1	A03AA Synthetic anticholinergics, esters with tertiary amino group	G	p6m	AGE over 70	0.000767
A03AA	A03AA1:age_over_70	0.249309	0.650275	0.383391	1.28314	0.358703	4.59	0.701	0	A03AA Synthetic anticholinergics, esters with tertiary amino group	G	p6m	AGE over 70	0.736
A10AE	A10AE	-0.473795	0.473179	-1.0013	0.622635	0.246289	1.57406	0.317	0	A10AE Insulins and analogues for injection, long-acting	G	p6m	AGE over 70	0.429
A10AE	age_over_70	-0.248092	0.0657169	-3.77516	0.780288	0.685984	0.887556	0.00016	1	A10AE Insulins and analogues for injection, long-acting	G	p6m	AGE over 70	0.000767
A10AE	A10AE1:age_over_70	0.48706	0.629411	0.773834	1.62752	0.473968	5.58863	0.439	0	A10AE Insulins and analogues for injection, long-acting	G	p6m	AGE over 70	0.516
A10BA	A10BA	-0.178938	0.191559	-0.934111	0.836158	0.574415	1.21717	0.35	0	A10BA Biguanides [DG:DG01684]	G	p6m	AGE over 70	0.459
A10BA	age_over_70	-0.245259	0.0671312	-3.65343	0.782502	0.686026	0.892545	0.000259	1	A10BA Biguanides [DG:DG01684]	G	p6m	AGE over 70	0.000906
A10BA	A10BA1:age_over_70	0.049385	0.245531	0.201135	1.05062	0.649295	1.70002	0.841	0	A10BA Biguanides [DG:DG01684]	G	p6m	AGE over 70	0.862
B01AC	B01AC	-0.801585	0.205762	-3.8957	0.448617	0.299726	0.671472	9.81e-05	1	B01AC Platelet aggregation inhibitors excl. heparin	G	p6m	AGE over 70	0.000767
B01AC	age_over_70	-0.304175	0.0688546	-4.41764	0.737732	0.644595	0.844326	1e-05	1	B01AC Platelet aggregation inhibitors excl. heparin	G	p6m	AGE over 70	0.00021
B01AC	B01AC1:age_over_70	0.784384	0.229764	3.41387	2.19106	1.39659	3.43746	0.000641	-1	B01AC Platelet aggregation inhibitors excl. heparin	G	p6m	AGE over 70	0.00158
C07AB	C07AB	-0.488279	0.182651	-2.67328	0.613682	0.429006	0.877855	0.00752	1	C07AB Beta blocking agents, selective	G	p6m	AGE over 70	0.0158
C07AB	age_over_70	-0.262681	0.068392	-3.84082	0.768987	0.672514	0.879299	0.000123	1	C07AB Beta blocking agents, selective	G	p6m	AGE over 70	0.000767
C07AB	C07AB1:age_over_70	0.306765	0.215627	1.42266	1.35902	0.890586	2.07385	0.155	0	C07AB Beta blocking agents, selective	G	p6m	AGE over 70	0.232
C08CA	C08CA	-0.364782	0.142266	-2.56409	0.694348	0.525382	0.917654	0.0103	1	C08CA Dihydropyridine derivatives [DG:DG01928]	G	p6m	AGE over 70	0.0206
C08CA	age_over_70	-0.263171	0.0697196	-3.7747	0.768611	0.670438	0.881159	0.00016	1	C08CA Dihydropyridine derivatives [DG:DG01928]	G	p6m	AGE over 70	0.000767
C08CA	C08CA1:age_over_70	0.204978	0.180167	1.13771	1.2275	0.862294	1.74737	0.255	0	C08CA Dihydropyridine derivatives [DG:DG01928]	G	p6m	AGE over 70	0.357
C09AA	C09AA	-0.397237	0.147915	-2.68559	0.672175	0.503004	0.89824	0.00724	1	C09AA ACE inhibitors, plain [DG:DG01501]	G	p6m	AGE over 70	0.0158
C09AA	age_over_70	-0.242702	0.0687575	-3.52982	0.784505	0.685594	0.897687	0.000416	1	C09AA ACE inhibitors, plain [DG:DG01501]	G	p6m	AGE over 70	0.00125
C09AA	C09AA1:age_over_70	0.0134307	0.192632	0.0697224	1.01352	0.694796	1.47846	0.944	0	C09AA ACE inhibitors, plain [DG:DG01501]	G	p6m	AGE over 70	0.944
C09CA	C09CA	-0.453684	0.198381	-2.28693	0.635283	0.430624	0.93721	0.0222	1	C09CA Angiotensin II receptor blockers, plain [DG:DG01495]	G	p6m	AGE over 70	0.0424
C09CA	age_over_70	-0.250903	0.0674532	-3.71966	0.778098	0.681735	0.888082	0.0002	1	C09CA Angiotensin II receptor blockers, plain [DG:DG01495]	G	p6m	AGE over 70	0.000767
C09CA	C09CA1:age_over_70	0.189043	0.245821	0.769025	1.20809	0.746187	1.95593	0.442	0	C09CA Angiotensin II receptor blockers, plain [DG:DG01495]	G	p6m	AGE over 70	0.516
C10AA	C10AA	-0.588057	0.118311	-4.97043	0.555406	0.440453	0.700359	6.72e-07	1	C10AA HMG CoA reductase inhibitors [DG:DG01660]	G	p6m	AGE over 70	2.82e-05
C10AA	age_over_70	-0.245362	0.075117	-3.2664	0.782421	0.675302	0.906532	0.00109	1	C10AA HMG CoA reductase inhibitors [DG:DG01660]	G	p6m	AGE over 70	0.00254
C10AA	C10AA1:age_over_70	0.231765	0.145927	1.58822	1.26082	0.947187	1.67831	0.112	0	C10AA HMG CoA reductase inhibitors [DG:DG01660]	G	p6m	AGE over 70	0.174
G03CA	G03CA	-0.393848	0.2335	-1.68671	0.674457	0.426766	1.0659	0.0917	0	G03CA Natural and semisynthetic estrogens, plain	G	p6m	AGE over 70	0.154
G03CA	age_over_70	-0.251583	0.0661636	-3.80244	0.777569	0.682996	0.885238	0.000144	1	G03CA Natural and semisynthetic estrogens, plain	G	p6m	AGE over 70	0.000767
G03CA	G03CA1:age_over_70	0.168646	0.374965	0.449764	1.1837	0.567619	2.46846	0.653	0	G03CA Natural and semisynthetic estrogens, plain	G	p6m	AGE over 70	0.703
G04CB	G04CB	-1.43439	0.789478	-1.81688	0.238261	0.0507013	1.11966	0.0693	0	G04CB Testosterone-5-alpha reductase inhibitors	G	p6m	AGE over 70	0.121
G04CB	age_over_70	-0.237407	0.0658646	-3.60448	0.78867	0.693152	0.89735	0.000313	1	G04CB Testosterone-5-alpha reductase inhibitors	G	p6m	AGE over 70	0.00101
G04CB	G04CB1:age_over_70	1.01403	0.825866	1.22784	2.7567	0.546237	13.9123	0.22	0	G04CB Testosterone-5-alpha reductase inhibitors	G	p6m	AGE over 70	0.319
H03AA	H03AA	-0.332871	0.180831	-1.84078	0.716862	0.502927	1.0218	0.0657	0	H03AA Thyroid hormones	G	p6m	AGE over 70	0.12
H03AA	age_over_70	-0.232272	0.0669466	-3.46951	0.79273	0.695245	0.903885	0.000522	1	H03AA Thyroid hormones	G	p6m	AGE over 70	0.00146
H03AA	H03AA1:age_over_70	-0.167101	0.262021	-0.637741	0.846114	0.506276	1.41407	0.524	0	H03AA Thyroid hormones	G	p6m	AGE over 70	0.595
R03BA	R03BA	-0.474059	0.292703	-1.61959	0.622471	0.350719	1.10479	0.105	0	R03BA Glucocorticoids	G	p6m	AGE over 70	0.17
R03BA	age_over_70	-0.246191	0.0659816	-3.7312	0.781773	0.686934	0.889707	0.000191	1	R03BA Glucocorticoids	G	p6m	AGE over 70	0.000767
R03BA	R03BA1:age_over_70	0.19116	0.414871	0.460769	1.21065	0.536865	2.73007	0.645	0	R03BA Glucocorticoids	G	p6m	AGE over 70	0.703
A02BC	A02BC	0.372699	0.466761	0.79848	1.45165	0.581482	3.62398	0.425	0	A02BC Proton pump inhibitors [DG:DG01646]	H	p6m	AGE over 70	0.811
A02BC	age_over_70	1.47334	0.319923	4.60529	4.36378	2.33094	8.16947	4.14e-06	-1	A02BC Proton pump inhibitors [DG:DG01646]	H	p6m	AGE over 70	1.24e-05
A02BC	A02BC1:age_over_70	-0.481912	0.505947	-0.952496	0.617601	0.229101	1.66491	0.341	0	A02BC Proton pump inhibitors [DG:DG01646]	H	p6m	AGE over 70	0.682
A03AA	A03AA	-13.1873	967.466	-0.0136308	1.87419e-06	0	Inf	0.989	0	A03AA Synthetic anticholinergics, esters with tertiary amino group	H	p6m	AGE over 70	0.999
A03AA	age_over_70	1.30688	0.257095	5.08328	3.69464	2.23215	6.11535	3.73e-07	-1	A03AA Synthetic anticholinergics, esters with tertiary amino group	H	p6m	AGE over 70	3.07e-06
A03AA	A03AA1:age_over_70	-1.44712	1240.7	-0.00116637	0.235248	0	Inf	0.999	0	A03AA Synthetic anticholinergics, esters with tertiary amino group	H	p6m	AGE over 70	0.999
A10AE	A10AE	0.372953	1.41168	0.26419	1.45202	0.0912622	23.1021	0.792	0	A10AE Insulins and analogues for injection, long-acting	H	p6m	AGE over 70	0.999
A10AE	age_over_70	1.3072	0.260201	5.02381	3.6958	2.2193	6.15463	5.1e-07	-1	A10AE Insulins and analogues for injection, long-acting	H	p6m	AGE over 70	3.07e-06
A10AE	A10AE1:age_over_70	0.324535	1.52597	0.212674	1.38339	0.0694985	27.5367	0.832	0	A10AE Insulins and analogues for injection, long-acting	H	p6m	AGE over 70	0.999
A10BA	A10BA	-0.559273	1.02158	-0.547462	0.571624	0.0771801	4.23366	0.584	0	A10BA Biguanides [DG:DG01684]	H	p6m	AGE over 70	0.979
A10BA	age_over_70	1.28981	0.263581	4.89342	3.6321	2.16664	6.08876	9.97e-07	-1	A10BA Biguanides [DG:DG01684]	H	p6m	AGE over 70	4.19e-06
A10BA	A10BA1:age_over_70	0.276597	1.06867	0.258824	1.31864	0.162342	10.7107	0.796	0	A10BA Biguanides [DG:DG01684]	H	p6m	AGE over 70	0.999
B01AC	B01AC	-0.23968	0.774564	-0.309438	0.78688	0.172413	3.59127	0.757	0	B01AC Platelet aggregation inhibitors excl. heparin	H	p6m	AGE over 70	0.999
B01AC	age_over_70	1.26696	0.272063	4.65687	3.55005	2.08278	6.05097	3.23e-06	-1	B01AC Platelet aggregation inhibitors excl. heparin	H	p6m	AGE over 70	1.04e-05
B01AC	B01AC1:age_over_70	0.317436	0.800029	0.39678	1.3736	0.286315	6.58986	0.692	0	B01AC Platelet aggregation inhibitors excl. heparin	H	p6m	AGE over 70	0.999
C07AB	C07AB	0.878069	0.536312	1.63724	2.40625	0.841029	6.88447	0.102	0	C07AB Beta blocking agents, selective	H	p6m	AGE over 70	0.268
C07AB	age_over_70	1.45841	0.290318	5.02347	4.2991	2.43359	7.59465	5.11e-07	-1	C07AB Beta blocking agents, selective	H	p6m	AGE over 70	3.07e-06
C07AB	C07AB1:age_over_70	-0.805513	0.576632	-1.39693	0.446859	0.144317	1.38364	0.162	0	C07AB Beta blocking agents, selective	H	p6m	AGE over 70	0.378
C08CA	C08CA	0.506218	0.517823	0.977588	1.659	0.601251	4.57762	0.328	0	C08CA Dihydropyridine derivatives [DG:DG01928]	H	p6m	AGE over 70	0.682
C08CA	age_over_70	1.47918	0.293173	5.04542	4.38935	2.47081	7.7976	4.55e-07	-1	C08CA Dihydropyridine derivatives [DG:DG01928]	H	p6m	AGE over 70	3.07e-06
C08CA	C08CA1:age_over_70	-0.831155	0.570944	-1.45576	0.435546	0.142241	1.33366	0.145	0	C08CA Dihydropyridine derivatives [DG:DG01928]	H	p6m	AGE over 70	0.358
C09AA	C09AA	-0.394678	0.695754	-0.567267	0.673897	0.172322	2.6354	0.571	0	C09AA ACE inhibitors, plain [DG:DG01501]	H	p6m	AGE over 70	0.979
C09AA	age_over_70	1.3121	0.273128	4.80398	3.71397	2.17441	6.34361	1.56e-06	-1	C09AA ACE inhibitors, plain [DG:DG01501]	H	p6m	AGE over 70	5.46e-06
C09AA	C09AA1:age_over_70	-0.0367105	0.739885	-0.0496165	0.963955	0.226067	4.11033	0.96	0	C09AA ACE inhibitors, plain [DG:DG01501]	H	p6m	AGE over 70	0.999
C09CA	C09CA	-0.502657	0.973193	-0.516503	0.604921	0.0898005	4.07492	0.606	0	C09CA Angiotensin II receptor blockers, plain [DG:DG01495]	H	p6m	AGE over 70	0.979
C09CA	age_over_70	1.27941	0.265646	4.81622	3.59452	2.13556	6.0502	1.47e-06	-1	C09CA Angiotensin II receptor blockers, plain [DG:DG01495]	H	p6m	AGE over 70	5.46e-06
C09CA	C09CA1:age_over_70	0.40016	1.01257	0.395193	1.49206	0.205045	10.8574	0.693	0	C09CA Angiotensin II receptor blockers, plain [DG:DG01495]	H	p6m	AGE over 70	0.999
C10AA	C10AA	0.569943	0.463162	1.23055	1.76817	0.713282	4.38313	0.218	0	C10AA HMG CoA reductase inhibitors [DG:DG01660]	H	p6m	AGE over 70	0.482
C10AA	age_over_70	1.654	0.328992	5.02747	5.22783	2.74328	9.96259	5e-07	-1	C10AA HMG CoA reductase inhibitors [DG:DG01660]	H	p6m	AGE over 70	3.07e-06
C10AA	C10AA1:age_over_70	-0.925906	0.497726	-1.86027	0.396172	0.149348	1.05092	0.0629	0	C10AA HMG CoA reductase inhibitors [DG:DG01660]	H	p6m	AGE over 70	0.176
G03CA	G03CA	-12.7182	408.203	-0.0311566	2.99613e-06	0	Inf	0.975	0	G03CA Natural and semisynthetic estrogens, plain	H	p6m	AGE over 70	0.999
G03CA	age_over_70	1.28072	0.257237	4.97876	3.59924	2.17391	5.95912	6.44e-07	-1	G03CA Natural and semisynthetic estrogens, plain	H	p6m	AGE over 70	3.38e-06
G03CA	G03CA1:age_over_70	12.0681	408.204	0.0295638	174217	0	Inf	0.976	0	G03CA Natural and semisynthetic estrogens, plain	H	p6m	AGE over 70	0.999
G04CB	G04CB	-12.675	628.135	-0.0201788	3.12831e-06	0	Inf	0.984	0	G04CB Testosterone-5-alpha reductase inhibitors	H	p6m	AGE over 70	0.999
G04CB	age_over_70	1.3198	0.257456	5.12633	3.74269	2.25958	6.19927	2.98e-07	-1	G04CB Testosterone-5-alpha reductase inhibitors	H	p6m	AGE over 70	3.07e-06
G04CB	G04CB1:age_over_70	11.8987	628.135	0.018943	147080	0	Inf	0.985	0	G04CB Testosterone-5-alpha reductase inhibitors	H	p6m	AGE over 70	0.999
H03AA	H03AA	0.472329	0.729398	0.64756	1.60372	0.383917	6.69919	0.517	0	H03AA Thyroid hormones	H	p6m	AGE over 70	0.944
H03AA	age_over_70	1.33274	0.270082	4.93455	3.7914	2.23303	6.4373	8.08e-07	-1	H03AA Thyroid hormones	H	p6m	AGE over 70	3.77e-06
H03AA	H03AA1:age_over_70	-0.263241	0.79725	-0.330186	0.768557	0.161074	3.66713	0.741	0	H03AA Thyroid hormones	H	p6m	AGE over 70	0.999
R03BA	R03BA	-12.8058	537.164	-0.0238396	2.74484e-06	0	Inf	0.981	0	R03BA Glucocorticoids	H	p6m	AGE over 70	0.999
R03BA	age_over_70	1.29503	0.257239	5.03435	3.65111	2.20522	6.045	4.83e-07	-1	R03BA Glucocorticoids	H	p6m	AGE over 70	3.07e-06
R03BA	R03BA1:age_over_70	12.1274	537.165	0.0225767	184874	0	Inf	0.982	0	R03BA Glucocorticoids	H	p6m	AGE over 70	0.999
A02BC	A02BC	-0.111827	0.735422	-0.152058	0.894199	0.211468	3.78115	0.879	0	A02BC Proton pump inhibitors [DG:DG01646]	A	p6m	Age_continuous	0.947
A02BC	age_brith_to_2020	0.0479034	0.00533825	8.97361	1.04907	1.03815	1.06011	4.4e-19	-1	A02BC Proton pump inhibitors [DG:DG01646]	A	p6m	Age_continuous	1.42e-18
A02BC	A02BC1:Age_continuous1	0.000216218	0.0107611	0.0200925	1.00022	0.979335	1.02154	0.984	0	A02BC Proton pump inhibitors [DG:DG01646]	A	p6m	Age_continuous	0.984
A03AA	A03AA	-3.17327	3.68917	-0.860157	0.0418666	3.02444e-05	57.9549	0.39	0	A03AA Synthetic anticholinergics, esters with tertiary amino group	A	p6m	Age_continuous	0.574
A03AA	age_brith_to_2020	0.0471823	0.00492259	9.58485	1.04831	1.03824	1.05848	1.61e-21	-1	A03AA Synthetic anticholinergics, esters with tertiary amino group	A	p6m	Age_continuous	1.13e-20
A03AA	A03AA1:Age_continuous1	0.0501168	0.0539486	0.928973	1.05139	0.945866	1.16869	0.353	0	A03AA Synthetic anticholinergics, esters with tertiary amino group	A	p6m	Age_continuous	0.57
A10AE	A10AE	-0.218318	4.69258	-0.0465242	0.803869	8.1207e-05	7957.52	0.963	0	A10AE Insulins and analogues for injection, long-acting	A	p6m	Age_continuous	0.984
A10AE	age_brith_to_2020	0.0474857	0.00491253	9.66623	1.04863	1.03858	1.05878	7.44e-22	-1	A10AE Insulins and analogues for injection, long-acting	A	p6m	Age_continuous	1.04e-20
A10AE	A10AE1:Age_continuous1	0.0108541	0.0670945	0.161774	1.01091	0.886308	1.15304	0.872	0	A10AE Insulins and analogues for injection, long-acting	A	p6m	Age_continuous	0.947
A10BA	A10BA	0.0448114	1.35151	0.0331565	1.04583	0.0739075	14.7991	0.974	0	A10BA Biguanides [DG:DG01684]	A	p6m	Age_continuous	0.984
A10BA	age_brith_to_2020	0.0477472	0.00498153	9.58485	1.04891	1.03871	1.0592	1.61e-21	-1	A10BA Biguanides [DG:DG01684]	A	p6m	Age_continuous	1.13e-20
A10BA	A10BA1:Age_continuous1	-0.00608288	0.0199142	-0.305455	0.993936	0.955877	1.03351	0.76	0	A10BA Biguanides [DG:DG01684]	A	p6m	Age_continuous	0.912
B01AC	B01AC	-4.35525	1.36964	-3.17985	0.0128392	0.000875651	0.188255	0.00148	1	B01AC Platelet aggregation inhibitors excl. heparin	A	p6m	Age_continuous	0.00414
B01AC	age_brith_to_2020	0.0444236	0.00508783	8.73134	1.04543	1.03505	1.05591	3.69e-18	-1	B01AC Platelet aggregation inhibitors excl. heparin	A	p6m	Age_continuous	1.11e-17
B01AC	B01AC1:Age_continuous1	0.057922	0.0189393	3.0583	1.05963	1.02101	1.09972	0.00224	-1	B01AC Platelet aggregation inhibitors excl. heparin	A	p6m	Age_continuous	0.00588
C07AB	C07AB	-2.15716	1.27869	-1.68701	0.115653	0.00942733	1.4188	0.0917	0	C07AB Beta blocking agents, selective	A	p6m	Age_continuous	0.203
C07AB	age_brith_to_2020	0.0455619	0.00505665	9.01031	1.04662	1.03629	1.05704	3.17e-19	-1	C07AB Beta blocking agents, selective	A	p6m	Age_continuous	1.11e-18
C07AB	C07AB1:Age_continuous1	0.0305213	0.0180624	1.68978	1.03099	0.995121	1.06816	0.0911	0	C07AB Beta blocking agents, selective	A	p6m	Age_continuous	0.203
C08CA	C08CA	-1.00329	0.988282	-1.01519	0.366669	0.052818	2.54547	0.31	0	C08CA Dihydropyridine derivatives [DG:DG01928]	A	p6m	Age_continuous	0.521
C08CA	age_brith_to_2020	0.0470252	0.00512953	9.16755	1.04815	1.03766	1.05874	7.7e-20	-1	C08CA Dihydropyridine derivatives [DG:DG01928]	A	p6m	Age_continuous	3.23e-19
C08CA	C08CA1:Age_continuous1	0.0111402	0.0142142	0.783735	1.0112	0.983411	1.03978	0.433	0	C08CA Dihydropyridine derivatives [DG:DG01928]	A	p6m	Age_continuous	0.606
C09AA	C09AA	-0.549583	1.01777	-0.539988	0.57719	0.0784726	4.24541	0.589	0	C09AA ACE inhibitors, plain [DG:DG01501]	A	p6m	Age_continuous	0.75
C09AA	age_brith_to_2020	0.0471953	0.00510144	9.25136	1.04833	1.03789	1.05886	3.59e-20	-1	C09AA ACE inhibitors, plain [DG:DG01501]	A	p6m	Age_continuous	1.68e-19
C09AA	C09AA1:Age_continuous1	0.00237962	0.0148133	0.16064	1.00238	0.973689	1.03192	0.872	0	C09AA ACE inhibitors, plain [DG:DG01501]	A	p6m	Age_continuous	0.947
C09CA	C09CA	-0.820104	1.34672	-0.608965	0.440386	0.0314154	6.17339	0.543	0	C09CA Angiotensin II receptor blockers, plain [DG:DG01495]	A	p6m	Age_continuous	0.736
C09CA	age_brith_to_2020	0.0473614	0.00501529	9.4434	1.0485	1.03824	1.05886	6.08e-21	-1	C09CA Angiotensin II receptor blockers, plain [DG:DG01495]	A	p6m	Age_continuous	3.65e-20
C09CA	C09CA1:Age_continuous1	0.00780576	0.0193031	0.404379	1.00784	0.970407	1.04671	0.686	0	C09CA Angiotensin II receptor blockers, plain [DG:DG01495]	A	p6m	Age_continuous	0.847
C10AA	C10AA	-1.85814	0.811488	-2.2898	0.155962	0.0317731	0.765555	0.0221	1	C10AA HMG CoA reductase inhibitors [DG:DG01660]	A	p6m	Age_continuous	0.0546
C10AA	age_brith_to_2020	0.0495602	0.00549143	9.02502	1.05081	1.03956	1.06218	2.78e-19	-1	C10AA HMG CoA reductase inhibitors [DG:DG01660]	A	p6m	Age_continuous	1.06e-18
C10AA	C10AA1:Age_continuous1	0.0186266	0.0115798	1.60854	1.0188	0.995932	1.0422	0.108	0	C10AA HMG CoA reductase inhibitors [DG:DG01660]	A	p6m	Age_continuous	0.227
G03CA	G03CA	-2.46782	1.86158	-1.32565	0.0847698	0.00220373	3.2608	0.185	0	G03CA Natural and semisynthetic estrogens, plain	A	p6m	Age_continuous	0.338
G03CA	age_brith_to_2020	0.0466523	0.00495771	9.41005	1.04776	1.03762	1.05799	8.3e-21	-1	G03CA Natural and semisynthetic estrogens, plain	A	p6m	Age_continuous	4.36e-20
G03CA	G03CA1:Age_continuous1	0.0398616	0.0287296	1.38747	1.04067	0.98367	1.10097	0.165	0	G03CA Natural and semisynthetic estrogens, plain	A	p6m	Age_continuous	0.321
G04CB	G04CB	-4.16624	4.69714	-0.886974	0.0155104	1.5529e-06	154.918	0.375	0	G04CB Testosterone-5-alpha reductase inhibitors	A	p6m	Age_continuous	0.574
G04CB	age_brith_to_2020	0.0475514	0.00493862	9.62849	1.0487	1.0386	1.0589	1.07e-21	-1	G04CB Testosterone-5-alpha reductase inhibitors	A	p6m	Age_continuous	1.12e-20
G04CB	G04CB1:Age_continuous1	0.052702	0.0621392	0.848128	1.05412	0.933208	1.19069	0.396	0	G04CB Testosterone-5-alpha reductase inhibitors	A	p6m	Age_continuous	0.574
H03AA	H03AA	1.47602	1.29136	1.14299	4.37548	0.347913	55.0276	0.253	0	H03AA Thyroid hormones	A	p6m	Age_continuous	0.443
H03AA	age_brith_to_2020	0.0490718	0.00500737	9.7999	1.0503	1.04004	1.06066	2.06e-22	-1	H03AA Thyroid hormones	A	p6m	Age_continuous	8.51e-21
H03AA	H03AA1:Age_continuous1	-0.0262769	0.0190452	-1.37971	0.974065	0.938365	1.01112	0.168	0	H03AA Thyroid hormones	A	p6m	Age_continuous	0.321
R03BA	R03BA	0.482429	1.96186	0.245903	1.62	0.0345978	75.855	0.806	0	R03BA Glucocorticoids	A	p6m	Age_continuous	0.94
R03BA	age_brith_to_2020	0.0481654	0.00495032	9.72976	1.04934	1.03921	1.05958	4.05e-22	-1	R03BA Glucocorticoids	A	p6m	Age_continuous	8.51e-21
R03BA	R03BA1:Age_continuous1	-0.01628	0.028942	-0.562503	0.983852	0.929579	1.04129	0.574	0	R03BA Glucocorticoids	A	p6m	Age_continuous	0.75
A02BC	A02BC	3.24204	2.48571	1.30427	25.5859	0.195654	3345.89	0.192	0	A02BC Proton pump inhibitors [DG:DG01646]	B	p6m	Age_continuous	0.538
A02BC	age_brith_to_2020	0.173614	0.0206168	8.42102	1.1896	1.14247	1.23867	5.21e-17	-1	A02BC Proton pump inhibitors [DG:DG01646]	B	p6m	Age_continuous	1.68e-16
A02BC	A02BC1:Age_continuous1	-0.0398606	0.0333213	-1.19625	0.960923	0.900154	1.0258	0.232	0	A02BC Proton pump inhibitors [DG:DG01646]	B	p6m	Age_continuous	0.541
A03AA	A03AA	-2.06838	5922.49	-0.000349242	0.126391	0	Inf	1	0	A03AA Synthetic anticholinergics, esters with tertiary amino group	B	p6m	Age_continuous	1
A03AA	age_brith_to_2020	0.161834	0.0170199	9.50849	1.17566	1.13708	1.21556	3.31e-21	-1	A03AA Synthetic anticholinergics, esters with tertiary amino group	B	p6m	Age_continuous	6.64e-20
A03AA	A03AA1:Age_continuous1	-0.170759	87.7771	-0.00194537	0.843025	1.53536e-75	4.62881e+74	0.998	0	A03AA Synthetic anticholinergics, esters with tertiary amino group	B	p6m	Age_continuous	1
A10AE	A10AE	-3.21144	11.5474	-0.278108	0.0402987	5.92897e-12	2.73907e+08	0.781	0	A10AE Insulins and analogues for injection, long-acting	B	p6m	Age_continuous	0.937
A10AE	age_brith_to_2020	0.161154	0.0170968	9.42602	1.17487	1.13614	1.21492	7.16e-21	-1	A10AE Insulins and analogues for injection, long-acting	B	p6m	Age_continuous	6.64e-20
A10AE	A10AE1:Age_continuous1	0.0577326	0.152214	0.379285	1.05943	0.78608	1.42784	0.705	0	A10AE Insulins and analogues for injection, long-acting	B	p6m	Age_continuous	0.897
A10BA	A10BA	-2.73564	5.52423	-0.495208	0.0648522	1.28293e-06	3278.29	0.621	0	A10BA Biguanides [DG:DG01684]	B	p6m	Age_continuous	0.841
A10BA	age_brith_to_2020	0.159502	0.0173282	9.2048	1.17293	1.13375	1.21346	5.49e-20	-1	A10BA Biguanides [DG:DG01684]	B	p6m	Age_continuous	3.84e-19
A10BA	A10BA1:Age_continuous1	0.0324208	0.0732347	0.442697	1.03295	0.894794	1.19244	0.658	0	A10BA Biguanides [DG:DG01684]	B	p6m	Age_continuous	0.864
B01AC	B01AC	-3.98768	4.31512	-0.924118	0.0185427	3.92623e-06	87.5728	0.355	0	B01AC Platelet aggregation inhibitors excl. heparin	B	p6m	Age_continuous	0.71
B01AC	age_brith_to_2020	0.156008	0.017738	8.79511	1.16884	1.12889	1.2102	2.12e-18	-1	B01AC Platelet aggregation inhibitors excl. heparin	B	p6m	Age_continuous	7.42e-18
B01AC	B01AC1:Age_continuous1	0.0526382	0.0561623	0.937252	1.05405	0.944148	1.17674	0.349	0	B01AC Platelet aggregation inhibitors excl. heparin	B	p6m	Age_continuous	0.71
C07AB	C07AB	2.91404	3.07903	0.946416	18.4312	0.0440402	7713.6	0.344	0	C07AB Beta blocking agents, selective	B	p6m	Age_continuous	0.71
C07AB	age_brith_to_2020	0.165151	0.0186083	8.87508	1.17957	1.13731	1.2234	1.05e-18	-1	C07AB Beta blocking agents, selective	B	p6m	Age_continuous	4.41e-18
C07AB	C07AB1:Age_continuous1	-0.0312007	0.0410901	-0.759325	0.969281	0.894258	1.0506	0.448	0	C07AB Beta blocking agents, selective	B	p6m	Age_continuous	0.841
C08CA	C08CA	3.57938	2.92687	1.22294	35.8511	0.11544	11133.9	0.221	0	C08CA Dihydropyridine derivatives [DG:DG01928]	B	p6m	Age_continuous	0.541
C08CA	age_brith_to_2020	0.170201	0.0188409	9.03358	1.18554	1.14255	1.23015	2.58e-19	-1	C08CA Dihydropyridine derivatives [DG:DG01928]	B	p6m	Age_continuous	1.2e-18
C08CA	C08CA1:Age_continuous1	-0.0486541	0.039353	-1.23635	0.952511	0.881783	1.02891	0.216	0	C08CA Dihydropyridine derivatives [DG:DG01928]	B	p6m	Age_continuous	0.541
C09AA	C09AA	-2.86554	3.96916	-0.721951	0.0569523	2.37621e-05	136.502	0.47	0	C09AA ACE inhibitors, plain [DG:DG01501]	B	p6m	Age_continuous	0.841
C09AA	age_brith_to_2020	0.157225	0.0177986	8.83356	1.17026	1.13013	1.21182	1.52e-18	-1	C09AA ACE inhibitors, plain [DG:DG01501]	B	p6m	Age_continuous	5.8e-18
C09AA	C09AA1:Age_continuous1	0.0368614	0.0525358	0.701643	1.03755	0.936	1.15012	0.483	0	C09AA ACE inhibitors, plain [DG:DG01501]	B	p6m	Age_continuous	0.841
C09CA	C09CA	-0.602665	4.35965	-0.138237	0.547351	0.000106206	2820.87	0.89	0	C09CA Angiotensin II receptor blockers, plain [DG:DG01495]	B	p6m	Age_continuous	0.972
C09CA	age_brith_to_2020	0.160893	0.0176251	9.12861	1.17456	1.13466	1.21586	1.1e-19	-1	C09CA Angiotensin II receptor blockers, plain [DG:DG01495]	B	p6m	Age_continuous	5.78e-19
C09CA	C09CA1:Age_continuous1	0.00888818	0.0577769	0.153836	1.00893	0.900875	1.12994	0.878	0	C09CA Angiotensin II receptor blockers, plain [DG:DG01495]	B	p6m	Age_continuous	0.972
C10AA	C10AA	1.31387	2.59323	0.506653	3.72053	0.0230434	600.707	0.612	0	C10AA HMG CoA reductase inhibitors [DG:DG01660]	B	p6m	Age_continuous	0.841
C10AA	age_brith_to_2020	0.167199	0.0200685	8.33142	1.18199	1.13639	1.22942	1.1e-16	-1	C10AA HMG CoA reductase inhibitors [DG:DG01660]	B	p6m	Age_continuous	3.3e-16
C10AA	C10AA1:Age_continuous1	-0.0182752	0.0345918	-0.528309	0.981891	0.917507	1.05079	0.597	0	C10AA HMG CoA reductase inhibitors [DG:DG01660]	B	p6m	Age_continuous	0.841
G03CA	G03CA	-10.9214	19.2511	-0.567314	1.80672e-05	7.33106e-22	4.4526e+11	0.571	0	G03CA Natural and semisynthetic estrogens, plain	B	p6m	Age_continuous	0.841
G03CA	age_brith_to_2020	0.160436	0.0170399	9.41531	1.17402	1.13545	1.21391	7.9e-21	-1	G03CA Natural and semisynthetic estrogens, plain	B	p6m	Age_continuous	6.64e-20
G03CA	G03CA1:Age_continuous1	0.138443	0.250811	0.551981	1.14848	0.702371	1.87795	0.581	0	G03CA Natural and semisynthetic estrogens, plain	B	p6m	Age_continuous	0.841
G04CB	G04CB	2.87964	12.4505	0.231288	17.8078	4.46087e-10	7.10888e+11	0.817	0	G04CB Testosterone-5-alpha reductase inhibitors	B	p6m	Age_continuous	0.953
G04CB	age_brith_to_2020	0.163945	0.0172057	9.52852	1.17815	1.13907	1.21857	2.74e-21	-1	G04CB Testosterone-5-alpha reductase inhibitors	B	p6m	Age_continuous	6.64e-20
G04CB	G04CB1:Age_continuous1	-0.04695	0.1607	-0.292158	0.954135	0.696271	1.3075	0.77	0	G04CB Testosterone-5-alpha reductase inhibitors	B	p6m	Age_continuous	0.937
H03AA	H03AA	0.52498	4.29521	0.122225	1.69043	0.000372179	7677.87	0.903	0	H03AA Thyroid hormones	B	p6m	Age_continuous	0.972
H03AA	age_brith_to_2020	0.161713	0.0176385	9.16818	1.17552	1.13557	1.21689	7.66e-20	-1	H03AA Thyroid hormones	B	p6m	Age_continuous	4.6e-19
H03AA	H03AA1:Age_continuous1	0.000304452	0.057383	0.00530561	1.0003	0.893866	1.11942	0.996	0	H03AA Thyroid hormones	B	p6m	Age_continuous	1
R03BA	R03BA	-12.728	22.9329	-0.55501	2.96686e-06	8.82222e-26	99774043350074	0.579	0	R03BA Glucocorticoids	B	p6m	Age_continuous	0.841
R03BA	age_brith_to_2020	0.160882	0.0170037	9.46161	1.17455	1.13604	1.21436	5.13e-21	-1	R03BA Glucocorticoids	B	p6m	Age_continuous	6.64e-20
R03BA	R03BA1:Age_continuous1	0.151342	0.295458	0.512229	1.16339	0.651859	2.07635	0.609	0	R03BA Glucocorticoids	B	p6m	Age_continuous	0.841
A02BC	A02BC	0.0281953	0.606535	0.046486	1.0286	0.3133	3.37699	0.963	0	A02BC Proton pump inhibitors [DG:DG01646]	C	p6m	Age_continuous	0.989
A02BC	age_brith_to_2020	-0.0168857	0.00444115	-3.8021	0.983256	0.974734	0.991852	0.000143	1	A02BC Proton pump inhibitors [DG:DG01646]	C	p6m	Age_continuous	0.000721
A02BC	A02BC1:Age_continuous1	0.00361061	0.00869999	0.415013	1.00362	0.986649	1.02088	0.678	0	A02BC Proton pump inhibitors [DG:DG01646]	C	p6m	Age_continuous	0.863
A03AA	A03AA	-2.13118	2.96661	-0.718389	0.118698	0.000354205	39.7768	0.472	0	A03AA Synthetic anticholinergics, esters with tertiary amino group	C	p6m	Age_continuous	0.641
A03AA	age_brith_to_2020	-0.0152815	0.00404432	-3.77851	0.984835	0.977059	0.992672	0.000158	1	A03AA Synthetic anticholinergics, esters with tertiary amino group	C	p6m	Age_continuous	0.000721
A03AA	A03AA1:Age_continuous1	0.0353787	0.0419039	0.844282	1.03601	0.954324	1.12469	0.399	0	A03AA Synthetic anticholinergics, esters with tertiary amino group	C	p6m	Age_continuous	0.587
A10AE	A10AE	-3.36698	2.91318	-1.15577	0.0344938	0.000114296	10.41	0.248	0	A10AE Insulins and analogues for injection, long-acting	C	p6m	Age_continuous	0.434
A10AE	age_brith_to_2020	-0.0153606	0.00404587	-3.79661	0.984757	0.976979	0.992597	0.000147	1	A10AE Insulins and analogues for injection, long-acting	C	p6m	Age_continuous	0.000721
A10AE	A10AE1:Age_continuous1	0.0505457	0.04093	1.23493	1.05184	0.97076	1.1397	0.217	0	A10AE Insulins and analogues for injection, long-acting	C	p6m	Age_continuous	0.396
A10BA	A10BA	0.0435446	1.04744	0.0415723	1.04451	0.134068	8.13762	0.967	0	A10BA Biguanides [DG:DG01684]	C	p6m	Age_continuous	0.989
A10BA	age_brith_to_2020	-0.0149398	0.00411413	-3.63134	0.985171	0.977259	0.993147	0.000282	1	A10BA Biguanides [DG:DG01684]	C	p6m	Age_continuous	0.000888
A10BA	A10BA1:Age_continuous1	-0.00179287	0.0151786	-0.118119	0.998209	0.96895	1.02835	0.906	0	A10BA Biguanides [DG:DG01684]	C	p6m	Age_continuous	0.989
B01AC	B01AC	-4.23918	1.13951	-3.72016	0.0144194	0.00154521	0.134557	0.000199	1	B01AC Platelet aggregation inhibitors excl. heparin	C	p6m	Age_continuous	0.000721
B01AC	age_brith_to_2020	-0.019367	0.00417271	-4.64136	0.980819	0.97283	0.988874	3.46e-06	1	B01AC Platelet aggregation inhibitors excl. heparin	C	p6m	Age_continuous	0.000145
B01AC	B01AC1:Age_continuous1	0.0595854	0.0154197	3.86425	1.0614	1.0298	1.09396	0.000111	-1	B01AC Platelet aggregation inhibitors excl. heparin	C	p6m	Age_continuous	0.000721
C07AB	C07AB	-1.4301	1.03571	-1.38079	0.239286	0.031428	1.82187	0.167	0	C07AB Beta blocking agents, selective	C	p6m	Age_continuous	0.319
C07AB	age_brith_to_2020	-0.0165492	0.00416175	-3.97648	0.983587	0.975597	0.991643	7e-05	1	C07AB Beta blocking agents, selective	C	p6m	Age_continuous	0.000721
C07AB	C07AB1:Age_continuous1	0.0203766	0.0142837	1.42656	1.02059	0.99241	1.04956	0.154	0	C07AB Beta blocking agents, selective	C	p6m	Age_continuous	0.308
C08CA	C08CA	-0.73382	0.820831	-0.893996	0.480072	0.0960752	2.39884	0.371	0	C08CA Dihydropyridine derivatives [DG:DG01928]	C	p6m	Age_continuous	0.587
C08CA	age_brith_to_2020	-0.0159047	0.0042204	-3.76853	0.984221	0.976113	0.992396	0.000164	1	C08CA Dihydropyridine derivatives [DG:DG01928]	C	p6m	Age_continuous	0.000721
C08CA	C08CA1:Age_continuous1	0.00966431	0.0115998	0.833144	1.00971	0.987014	1.03293	0.405	0	C08CA Dihydropyridine derivatives [DG:DG01928]	C	p6m	Age_continuous	0.587
C09AA	C09AA	-0.154197	0.842267	-0.183073	0.857104	0.164472	4.46658	0.855	0	C09AA ACE inhibitors, plain [DG:DG01501]	C	p6m	Age_continuous	0.989
C09AA	age_brith_to_2020	-0.0147507	0.0041959	-3.51549	0.985358	0.977287	0.993494	0.000439	1	C09AA ACE inhibitors, plain [DG:DG01501]	C	p6m	Age_continuous	0.00123
C09AA	C09AA1:Age_continuous1	-0.00195924	0.0120337	-0.162812	0.998043	0.974779	1.02186	0.871	0	C09AA ACE inhibitors, plain [DG:DG01501]	C	p6m	Age_continuous	0.989
C09CA	C09CA	-0.119842	1.10498	-0.108456	0.887061	0.101715	7.73607	0.914	0	C09CA Angiotensin II receptor blockers, plain [DG:DG01495]	C	p6m	Age_continuous	0.989
C09CA	age_brith_to_2020	-0.014905	0.00411918	-3.61844	0.985206	0.977284	0.993192	0.000296	1	C09CA Angiotensin II receptor blockers, plain [DG:DG01495]	C	p6m	Age_continuous	0.000888
C09CA	C09CA1:Age_continuous1	-0.000212686	0.0155823	-0.0136492	0.999787	0.969715	1.03079	0.989	0	C09CA Angiotensin II receptor blockers, plain [DG:DG01495]	C	p6m	Age_continuous	0.989
C10AA	C10AA	-1.76506	0.677446	-2.60546	0.171177	0.0453732	0.645786	0.00918	1	C10AA HMG CoA reductase inhibitors [DG:DG01660]	C	p6m	Age_continuous	0.0227
C10AA	age_brith_to_2020	-0.0169052	0.00444574	-3.80256	0.983237	0.974707	0.991842	0.000143	1	C10AA HMG CoA reductase inhibitors [DG:DG01660]	C	p6m	Age_continuous	0.000721
C10AA	C10AA1:Age_continuous1	0.0215948	0.00951098	2.27052	1.02183	1.00296	1.04106	0.0232	-1	C10AA HMG CoA reductase inhibitors [DG:DG01660]	C	p6m	Age_continuous	0.0541
G03CA	G03CA	-0.740861	1.44846	-0.511483	0.476703	0.0278815	8.15042	0.609	0	G03CA Natural and semisynthetic estrogens, plain	C	p6m	Age_continuous	0.799
G03CA	age_brith_to_2020	-0.0152136	0.00408058	-3.72828	0.984902	0.977056	0.99281	0.000193	1	G03CA Natural and semisynthetic estrogens, plain	C	p6m	Age_continuous	0.000721
G03CA	G03CA1:Age_continuous1	0.015566	0.0216711	0.718285	1.01569	0.97345	1.05976	0.473	0	G03CA Natural and semisynthetic estrogens, plain	C	p6m	Age_continuous	0.641
G04CB	G04CB	-7.68303	4.0415	-1.90104	0.000460575	1.67172e-07	1.26893	0.0573	0	G04CB Testosterone-5-alpha reductase inhibitors	C	p6m	Age_continuous	0.123
G04CB	age_brith_to_2020	-0.015403	0.00405648	-3.79713	0.984715	0.976917	0.992575	0.000146	1	G04CB Testosterone-5-alpha reductase inhibitors	C	p6m	Age_continuous	0.000721
G04CB	G04CB1:Age_continuous1	0.100076	0.0528849	1.89233	1.10525	0.996429	1.22597	0.0585	0	G04CB Testosterone-5-alpha reductase inhibitors	C	p6m	Age_continuous	0.123
H03AA	H03AA	0.918768	1.0973	0.837295	2.5062	0.291733	21.5301	0.402	0	H03AA Thyroid hormones	C	p6m	Age_continuous	0.587
H03AA	age_brith_to_2020	-0.0140975	0.00411041	-3.4297	0.986001	0.97809	0.993977	0.000604	1	H03AA Thyroid hormones	C	p6m	Age_continuous	0.00159
H03AA	H03AA1:Age_continuous1	-0.0162762	0.0159958	-1.01752	0.983856	0.953489	1.01519	0.309	0	H03AA Thyroid hormones	C	p6m	Age_continuous	0.519
R03BA	R03BA	0.160526	1.74089	0.0922094	1.17413	0.0387135	35.6098	0.926	0	R03BA Glucocorticoids	C	p6m	Age_continuous	0.989
R03BA	age_brith_to_2020	-0.0150779	0.00406248	-3.7115	0.985035	0.977223	0.99291	0.000206	1	R03BA Glucocorticoids	C	p6m	Age_continuous	0.000721
R03BA	R03BA1:Age_continuous1	0.000355805	0.0255034	0.0139513	1.00036	0.951581	1.05163	0.989	0	R03BA Glucocorticoids	C	p6m	Age_continuous	0.989
A02BC	A02BC	4.3151	2.51284	1.71722	74.8208	0.54335	10303	0.0859	0	A02BC Proton pump inhibitors [DG:DG01646]	D	p6m	Age_continuous	0.241
A02BC	age_brith_to_2020	0.14114	0.0212594	6.63894	1.15159	1.10459	1.20058	3.16e-11	-1	A02BC Proton pump inhibitors [DG:DG01646]	D	p6m	Age_continuous	1.11e-10
A02BC	A02BC1:Age_continuous1	-0.0514348	0.0334294	-1.53861	0.949866	0.889625	1.01419	0.124	0	A02BC Proton pump inhibitors [DG:DG01646]	D	p6m	Age_continuous	0.326
A03AA	A03AA	-4.0584	5400.45	-0.000751493	0.0172767	0	Inf	0.999	0	A03AA Synthetic anticholinergics, esters with tertiary amino group	D	p6m	Age_continuous	0.999
A03AA	age_brith_to_2020	0.125905	0.0171405	7.34549	1.13417	1.09671	1.17292	2.05e-13	-1	A03AA Synthetic anticholinergics, esters with tertiary amino group	D	p6m	Age_continuous	3.49e-12
A03AA	A03AA1:Age_continuous1	-0.133036	77.341	-0.00172012	0.875434	1.28591e-66	5.95986e+65	0.999	0	A03AA Synthetic anticholinergics, esters with tertiary amino group	D	p6m	Age_continuous	0.999
A10AE	A10AE	-7.34928	11.0053	-0.667792	0.000643057	2.75718e-13	1.4998e+06	0.504	0	A10AE Insulins and analogues for injection, long-acting	D	p6m	Age_continuous	0.814
A10AE	age_brith_to_2020	0.124889	0.0172239	7.25091	1.13302	1.09541	1.17192	4.15e-13	-1	A10AE Insulins and analogues for injection, long-acting	D	p6m	Age_continuous	3.49e-12
A10AE	A10AE1:Age_continuous1	0.108568	0.141894	0.765135	1.11468	0.844053	1.47208	0.444	0	A10AE Insulins and analogues for injection, long-acting	D	p6m	Age_continuous	0.756
A10BA	A10BA	-2.29993	5.14247	-0.447243	0.100266	4.20595e-06	2390.23	0.655	0	A10BA Biguanides [DG:DG01684]	D	p6m	Age_continuous	0.873
A10BA	age_brith_to_2020	0.124119	0.0175893	7.05651	1.13215	1.09379	1.17186	1.71e-12	-1	A10BA Biguanides [DG:DG01684]	D	p6m	Age_continuous	8.26e-12
A10BA	A10BA1:Age_continuous1	0.0273843	0.0677202	0.404373	1.02776	0.900014	1.17364	0.686	0	A10BA Biguanides [DG:DG01684]	D	p6m	Age_continuous	0.873
B01AC	B01AC	-5.15802	4.1296	-1.24904	0.00575307	1.757e-06	18.8377	0.212	0	B01AC Platelet aggregation inhibitors excl. heparin	D	p6m	Age_continuous	0.445
B01AC	age_brith_to_2020	0.116781	0.017918	6.51751	1.12387	1.08509	1.16404	7.16e-11	-1	B01AC Platelet aggregation inhibitors excl. heparin	D	p6m	Age_continuous	2.15e-10
B01AC	B01AC1:Age_continuous1	0.0702872	0.0534776	1.31433	1.07282	0.966062	1.19137	0.189	0	B01AC Platelet aggregation inhibitors excl. heparin	D	p6m	Age_continuous	0.418
C07AB	C07AB	3.44467	3.10303	1.1101	31.3328	0.0715631	13718.6	0.267	0	C07AB Beta blocking agents, selective	D	p6m	Age_continuous	0.534
C07AB	age_brith_to_2020	0.131789	0.018964	6.94944	1.14087	1.09924	1.18407	3.67e-12	-1	C07AB Beta blocking agents, selective	D	p6m	Age_continuous	1.54e-11
C07AB	C07AB1:Age_continuous1	-0.040001	0.0410309	-0.974901	0.960788	0.886548	1.04125	0.33	0	C07AB Beta blocking agents, selective	D	p6m	Age_continuous	0.63
C08CA	C08CA	4.32467	2.96794	1.45713	75.5404	0.22483	25380.8	0.145	0	C08CA Dihydropyridine derivatives [DG:DG01928]	D	p6m	Age_continuous	0.338
C08CA	age_brith_to_2020	0.136907	0.0191042	7.16632	1.14672	1.10458	1.19047	7.72e-13	-1	C08CA Dihydropyridine derivatives [DG:DG01928]	D	p6m	Age_continuous	5.4e-12
C08CA	C08CA1:Age_continuous1	-0.0590852	0.0396702	-1.48941	0.942626	0.872112	1.01884	0.136	0	C08CA Dihydropyridine derivatives [DG:DG01928]	D	p6m	Age_continuous	0.336
C09AA	C09AA	-1.619	3.81969	-0.423857	0.198096	0.000111055	353.358	0.672	0	C09AA ACE inhibitors, plain [DG:DG01501]	D	p6m	Age_continuous	0.873
C09AA	age_brith_to_2020	0.123913	0.0181246	6.83672	1.13192	1.09241	1.17285	8.11e-12	-1	C09AA ACE inhibitors, plain [DG:DG01501]	D	p6m	Age_continuous	3.1e-11
C09AA	C09AA1:Age_continuous1	0.0168787	0.0502578	0.335842	1.01702	0.921617	1.1223	0.737	0	C09AA ACE inhibitors, plain [DG:DG01501]	D	p6m	Age_continuous	0.91
C09CA	C09CA	0.0283684	4.33302	0.00654702	1.02877	0.00021088	5018.85	0.995	0	C09CA Angiotensin II receptor blockers, plain [DG:DG01495]	D	p6m	Age_continuous	0.999
C09CA	age_brith_to_2020	0.126009	0.0178694	7.05167	1.13429	1.09525	1.17472	1.77e-12	-1	C09CA Angiotensin II receptor blockers, plain [DG:DG01495]	D	p6m	Age_continuous	8.26e-12
C09CA	C09CA1:Age_continuous1	-0.000388131	0.0570588	-0.0068023	0.999612	0.893846	1.11789	0.995	0	C09CA Angiotensin II receptor blockers, plain [DG:DG01495]	D	p6m	Age_continuous	0.999
C10AA	C10AA	1.97071	2.60619	0.756166	7.17578	0.0433979	1186.5	0.45	0	C10AA HMG CoA reductase inhibitors [DG:DG01660]	D	p6m	Age_continuous	0.756
C10AA	age_brith_to_2020	0.135628	0.0207652	6.5315	1.14526	1.09958	1.19283	6.52e-11	-1	C10AA HMG CoA reductase inhibitors [DG:DG01660]	D	p6m	Age_continuous	2.11e-10
C10AA	C10AA1:Age_continuous1	-0.0277273	0.0345474	-0.802587	0.972654	0.908974	1.04079	0.422	0	C10AA HMG CoA reductase inhibitors [DG:DG01660]	D	p6m	Age_continuous	0.756
G03CA	G03CA	-9.16967	16.932	-0.541558	0.000104151	4.02766e-19	2.69325e+10	0.588	0	G03CA Natural and semisynthetic estrogens, plain	D	p6m	Age_continuous	0.83
G03CA	age_brith_to_2020	0.12489	0.0171892	7.26559	1.13302	1.09549	1.17185	3.72e-13	-1	G03CA Natural and semisynthetic estrogens, plain	D	p6m	Age_continuous	3.49e-12
G03CA	G03CA1:Age_continuous1	0.117474	0.219602	0.534942	1.12465	0.731294	1.7296	0.593	0	G03CA Natural and semisynthetic estrogens, plain	D	p6m	Age_continuous	0.83
G04CB	G04CB	-3.24139	12.5159	-0.258981	0.0391097	8.68283e-13	1.7616e+09	0.796	0	G04CB Testosterone-5-alpha reductase inhibitors	D	p6m	Age_continuous	0.932
G04CB	age_brith_to_2020	0.126782	0.017251	7.34926	1.13517	1.09743	1.17421	2e-13	-1	G04CB Testosterone-5-alpha reductase inhibitors	D	p6m	Age_continuous	3.49e-12
G04CB	G04CB1:Age_continuous1	0.034179	0.161235	0.211982	1.03477	0.754397	1.41934	0.832	0	G04CB Testosterone-5-alpha reductase inhibitors	D	p6m	Age_continuous	0.944
H03AA	H03AA	1.08695	4.26355	0.25494	2.96521	0.000696478	12624.2	0.799	0	H03AA Thyroid hormones	D	p6m	Age_continuous	0.932
H03AA	age_brith_to_2020	0.126365	0.0178436	7.08179	1.1347	1.0957	1.17508	1.43e-12	-1	H03AA Thyroid hormones	D	p6m	Age_continuous	8.26e-12
H03AA	H03AA1:Age_continuous1	-0.0092592	0.0564521	-0.164019	0.990784	0.887006	1.1067	0.87	0	H03AA Thyroid hormones	D	p6m	Age_continuous	0.962
R03BA	R03BA	-12.0791	20.7995	-0.580738	5.67701e-06	1.12064e-23	2875886614577	0.561	0	R03BA Glucocorticoids	D	p6m	Age_continuous	0.83
R03BA	age_brith_to_2020	0.125106	0.0171602	7.29046	1.13327	1.09579	1.17203	3.09e-13	-1	R03BA Glucocorticoids	D	p6m	Age_continuous	3.49e-12
R03BA	R03BA1:Age_continuous1	0.15279	0.267405	0.571381	1.16508	0.689826	1.96776	0.568	0	R03BA Glucocorticoids	D	p6m	Age_continuous	0.83
A02BC	A02BC	0.00399231	0.325684	0.0122582	1.004	0.530286	1.90089	0.99	0	A02BC Proton pump inhibitors [DG:DG01646]	E	p6m	Age_continuous	0.99
A02BC	age_brith_to_2020	-0.0586935	0.0024016	-24.4393	0.942996	0.938567	0.947445	8.19e-132	1	A02BC Proton pump inhibitors [DG:DG01646]	E	p6m	Age_continuous	2.65e-131
A02BC	A02BC1:Age_continuous1	0.00562887	0.00484544	1.16168	1.00564	0.996139	1.01524	0.245	0	A02BC Proton pump inhibitors [DG:DG01646]	E	p6m	Age_continuous	0.447
A03AA	A03AA	-0.600307	1.63913	-0.366235	0.548643	0.0220828	13.6309	0.714	0	A03AA Synthetic anticholinergics, esters with tertiary amino group	E	p6m	Age_continuous	0.933
A03AA	age_brith_to_2020	-0.0560632	0.00219025	-25.5967	0.945479	0.941429	0.949547	2.18e-144	1	A03AA Synthetic anticholinergics, esters with tertiary amino group	E	p6m	Age_continuous	2.29e-143
A03AA	A03AA1:Age_continuous1	0.0127398	0.024421	0.521673	1.01282	0.965485	1.06248	0.602	0	A03AA Synthetic anticholinergics, esters with tertiary amino group	E	p6m	Age_continuous	0.872
A10AE	A10AE	-5.54434	2.28077	-2.43091	0.00390953	4.47431e-05	0.341605	0.0151	1	A10AE Insulins and analogues for injection, long-acting	E	p6m	Age_continuous	0.0359
A10AE	age_brith_to_2020	-0.0563208	0.00218933	-25.7251	0.945236	0.941188	0.949301	8.07e-146	1	A10AE Insulins and analogues for injection, long-acting	E	p6m	Age_continuous	3.39e-144
A10AE	A10AE1:Age_continuous1	0.0784253	0.032367	2.423	1.08158	1.0151	1.15242	0.0154	-1	A10AE Insulins and analogues for injection, long-acting	E	p6m	Age_continuous	0.0359
A10BA	A10BA	-0.541115	0.619624	-0.873296	0.582099	0.17281	1.96075	0.383	0	A10BA Biguanides [DG:DG01684]	E	p6m	Age_continuous	0.619
A10BA	age_brith_to_2020	-0.0564338	0.00222056	-25.4142	0.945129	0.941025	0.949251	2.29e-142	1	A10BA Biguanides [DG:DG01684]	E	p6m	Age_continuous	1.6e-141
A10BA	A10BA1:Age_continuous1	0.0100103	0.00922788	1.08479	1.01006	0.991956	1.0285	0.278	0	A10BA Biguanides [DG:DG01684]	E	p6m	Age_continuous	0.487
B01AC	B01AC	-1.07734	0.56574	-1.9043	0.340501	0.112346	1.032	0.0569	0	B01AC Platelet aggregation inhibitors excl. heparin	E	p6m	Age_continuous	0.114
B01AC	age_brith_to_2020	-0.0578881	0.00225753	-25.6423	0.943756	0.939589	0.947941	6.78e-145	1	B01AC Platelet aggregation inhibitors excl. heparin	E	p6m	Age_continuous	1.42e-143
B01AC	B01AC1:Age_continuous1	0.0189663	0.00799112	2.37343	1.01915	1.00331	1.03524	0.0176	-1	B01AC Platelet aggregation inhibitors excl. heparin	E	p6m	Age_continuous	0.0389
C07AB	C07AB	0.0783628	0.557414	0.140583	1.08151	0.36271	3.22482	0.888	0	C07AB Beta blocking agents, selective	E	p6m	Age_continuous	0.964
C07AB	age_brith_to_2020	-0.0562633	0.0022462	-25.0482	0.94529	0.941138	0.949461	2.34e-138	1	C07AB Beta blocking agents, selective	E	p6m	Age_continuous	9.83e-138
C07AB	C07AB1:Age_continuous1	0.000561525	0.00799261	0.0702556	1.00056	0.98501	1.01636	0.944	0	C07AB Beta blocking agents, selective	E	p6m	Age_continuous	0.967
C08CA	C08CA	-0.136006	0.435025	-0.312639	0.872838	0.372081	2.04752	0.755	0	C08CA Dihydropyridine derivatives [DG:DG01928]	E	p6m	Age_continuous	0.933
C08CA	age_brith_to_2020	-0.0567234	0.00228862	-24.785	0.944855	0.940627	0.949103	1.65e-135	1	C08CA Dihydropyridine derivatives [DG:DG01928]	E	p6m	Age_continuous	6.3e-135
C08CA	C08CA1:Age_continuous1	0.00369706	0.0063669	0.580669	1.0037	0.991257	1.01631	0.561	0	C08CA Dihydropyridine derivatives [DG:DG01928]	E	p6m	Age_continuous	0.842
C09AA	C09AA	0.101826	0.432275	0.235559	1.10719	0.474535	2.58331	0.814	0	C09AA ACE inhibitors, plain [DG:DG01501]	E	p6m	Age_continuous	0.934
C09AA	age_brith_to_2020	-0.055801	0.00227704	-24.5059	0.945727	0.941516	0.949957	1.6e-132	1	C09AA ACE inhibitors, plain [DG:DG01501]	E	p6m	Age_continuous	5.6e-132
C09AA	C09AA1:Age_continuous1	-0.0018043	0.00641181	-0.281402	0.998197	0.985732	1.01082	0.778	0	C09AA ACE inhibitors, plain [DG:DG01501]	E	p6m	Age_continuous	0.934
C09CA	C09CA	0.194978	0.581246	0.335449	1.21528	0.388973	3.79696	0.737	0	C09CA Angiotensin II receptor blockers, plain [DG:DG01495]	E	p6m	Age_continuous	0.933
C09CA	age_brith_to_2020	-0.0559504	0.00223228	-25.0642	0.945586	0.941458	0.949732	1.57e-138	1	C09CA Angiotensin II receptor blockers, plain [DG:DG01495]	E	p6m	Age_continuous	7.33e-138
C09CA	C09CA1:Age_continuous1	-0.00189352	0.00848023	-0.223287	0.998108	0.981656	1.01484	0.823	0	C09CA Angiotensin II receptor blockers, plain [DG:DG01495]	E	p6m	Age_continuous	0.934
C10AA	C10AA	-0.537684	0.340714	-1.57811	0.5841	0.29955	1.13895	0.115	0	C10AA HMG CoA reductase inhibitors [DG:DG01660]	E	p6m	Age_continuous	0.22
C10AA	age_brith_to_2020	-0.0593722	0.00246326	-24.1031	0.942356	0.937817	0.946917	2.87e-128	1	C10AA HMG CoA reductase inhibitors [DG:DG01660]	E	p6m	Age_continuous	8.61e-128
C10AA	C10AA1:Age_continuous1	0.00986617	0.00497101	1.98474	1.00992	1.00012	1.0198	0.0472	-1	C10AA HMG CoA reductase inhibitors [DG:DG01660]	E	p6m	Age_continuous	0.0991
G03CA	G03CA	0.515671	0.752557	0.685225	1.67476	0.383154	7.32036	0.493	0	G03CA Natural and semisynthetic estrogens, plain	E	p6m	Age_continuous	0.767
G03CA	age_brith_to_2020	-0.0556417	0.00221195	-25.1551	0.945878	0.941786	0.949988	1.6e-139	1	G03CA Natural and semisynthetic estrogens, plain	E	p6m	Age_continuous	9.6e-139
G03CA	G03CA1:Age_continuous1	-0.00502888	0.0119935	-0.419299	0.994984	0.971867	1.01865	0.675	0	G03CA Natural and semisynthetic estrogens, plain	E	p6m	Age_continuous	0.933
G04CB	G04CB	-5.58084	2.22027	-2.51358	0.0037694	4.85699e-05	0.292535	0.012	1	G04CB Testosterone-5-alpha reductase inhibitors	E	p6m	Age_continuous	0.0315
G04CB	age_brith_to_2020	-0.0562992	0.00219846	-25.6085	0.945256	0.941192	0.949338	1.61e-144	1	G04CB Testosterone-5-alpha reductase inhibitors	E	p6m	Age_continuous	2.25e-143
G04CB	G04CB1:Age_continuous1	0.0748301	0.0296062	2.52752	1.0777	1.01694	1.14209	0.0115	-1	G04CB Testosterone-5-alpha reductase inhibitors	E	p6m	Age_continuous	0.0315
H03AA	H03AA	-0.0535899	0.553282	-0.0968583	0.947821	0.320457	2.80338	0.923	0	H03AA Thyroid hormones	E	p6m	Age_continuous	0.967
H03AA	age_brith_to_2020	-0.0560674	0.00223486	-25.0877	0.945475	0.941343	0.949626	8.71e-139	1	H03AA Thyroid hormones	E	p6m	Age_continuous	4.57e-138
H03AA	H03AA1:Age_continuous1	0.00109496	0.00828203	0.132209	1.0011	0.984976	1.01748	0.895	0	H03AA Thyroid hormones	E	p6m	Age_continuous	0.964
R03BA	R03BA	-0.268618	0.821321	-0.327056	0.764436	0.152837	3.82343	0.744	0	R03BA Glucocorticoids	E	p6m	Age_continuous	0.933
R03BA	age_brith_to_2020	-0.0564079	0.00220676	-25.5614	0.945154	0.941074	0.94925	5.37e-144	1	R03BA Glucocorticoids	E	p6m	Age_continuous	4.51e-143
R03BA	R03BA1:Age_continuous1	0.011934	0.0123841	0.963651	1.01201	0.987737	1.03687	0.335	0	R03BA Glucocorticoids	E	p6m	Age_continuous	0.563
A02BC	A02BC	-1.27634	0.35143	-3.63185	0.279057	0.140134	0.555702	0.000282	1	A02BC Proton pump inhibitors [DG:DG01646]	F	p6m	Age_continuous	0.000697
A02BC	age_brith_to_2020	-0.0648817	0.00259917	-24.9624	0.937178	0.932416	0.941965	3.54e-136	1	A02BC Proton pump inhibitors [DG:DG01646]	F	p6m	Age_continuous	1.14e-135
A02BC	A02BC1:Age_continuous1	0.0143147	0.00520206	2.75173	1.01442	1.00413	1.02481	0.00593	-1	A02BC Proton pump inhibitors [DG:DG01646]	F	p6m	Age_continuous	0.0125
A03AA	A03AA	-1.46578	1.72607	-0.849204	0.230897	0.00783666	6.8031	0.396	0	A03AA Synthetic anticholinergics, esters with tertiary amino group	F	p6m	Age_continuous	0.459
A03AA	age_brith_to_2020	-0.0636972	0.0023633	-26.9526	0.938289	0.933953	0.942645	3.64e-158	1	A03AA Synthetic anticholinergics, esters with tertiary amino group	F	p6m	Age_continuous	6.53e-157
A03AA	A03AA1:Age_continuous1	0.0158737	0.0256102	0.61982	1.016	0.966259	1.0683	0.535	0	A03AA Synthetic anticholinergics, esters with tertiary amino group	F	p6m	Age_continuous	0.574
A10AE	A10AE	-5.96743	2.42714	-2.45862	0.0025608	2.19941e-05	0.298158	0.014	1	A10AE Insulins and analogues for injection, long-acting	F	p6m	Age_continuous	0.0256
A10AE	age_brith_to_2020	-0.0640523	0.00236171	-27.1211	0.937956	0.933624	0.942308	4.23e-160	1	A10AE Insulins and analogues for injection, long-acting	F	p6m	Age_continuous	1.78e-158
A10AE	A10AE1:Age_continuous1	0.0781695	0.0344999	2.26579	1.08131	1.0106	1.15695	0.0235	-1	A10AE Insulins and analogues for injection, long-acting	F	p6m	Age_continuous	0.0411
A10BA	A10BA	-0.540189	0.689186	-0.783807	0.582638	0.150917	2.24936	0.433	0	A10BA Biguanides [DG:DG01684]	F	p6m	Age_continuous	0.479
A10BA	age_brith_to_2020	-0.0639637	0.00239206	-26.74	0.938039	0.933651	0.942447	9.71e-156	1	A10BA Biguanides [DG:DG01684]	F	p6m	Age_continuous	5.83e-155
A10BA	A10BA1:Age_continuous1	0.00871285	0.0101776	0.856082	1.00875	0.988827	1.02908	0.392	0	A10BA Biguanides [DG:DG01684]	F	p6m	Age_continuous	0.459
B01AC	B01AC	-2.60063	0.594913	-4.37145	0.0742266	0.0231286	0.238216	1.24e-05	1	B01AC Platelet aggregation inhibitors excl. heparin	F	p6m	Age_continuous	3.47e-05
B01AC	age_brith_to_2020	-0.065737	0.00244158	-26.9239	0.936377	0.931907	0.940869	7.77e-158	1	B01AC Platelet aggregation inhibitors excl. heparin	F	p6m	Age_continuous	6.53e-157
B01AC	B01AC1:Age_continuous1	0.0354044	0.00839329	4.21819	1.03604	1.01913	1.05322	2.47e-05	-1	B01AC Platelet aggregation inhibitors excl. heparin	F	p6m	Age_continuous	6.48e-05
C07AB	C07AB	-1.1148	0.601658	-1.85288	0.327981	0.100855	1.0666	0.0639	0	C07AB Beta blocking agents, selective	F	p6m	Age_continuous	0.0994
C07AB	age_brith_to_2020	-0.0638475	0.00242549	-26.3235	0.938148	0.933699	0.942619	4.85e-151	1	C07AB Beta blocking agents, selective	F	p6m	Age_continuous	2.04e-150
C07AB	C07AB1:Age_continuous1	0.0125395	0.00859824	1.45838	1.01262	0.995696	1.02983	0.145	0	C07AB Beta blocking agents, selective	F	p6m	Age_continuous	0.185
C08CA	C08CA	-0.883606	0.475094	-1.85986	0.41329	0.162869	1.04875	0.0629	0	C08CA Dihydropyridine derivatives [DG:DG01928]	F	p6m	Age_continuous	0.0994
C08CA	age_brith_to_2020	-0.0645513	0.00246789	-26.1564	0.937488	0.932964	0.942034	3.55e-149	1	C08CA Dihydropyridine derivatives [DG:DG01928]	F	p6m	Age_continuous	1.36e-148
C08CA	C08CA1:Age_continuous1	0.0117194	0.00691817	1.694	1.01179	0.998161	1.0256	0.0903	0	C08CA Dihydropyridine derivatives [DG:DG01928]	F	p6m	Age_continuous	0.131
C09AA	C09AA	-0.285744	0.474588	-0.602088	0.751455	0.296427	1.90497	0.547	0	C09AA ACE inhibitors, plain [DG:DG01501]	F	p6m	Age_continuous	0.574
C09AA	age_brith_to_2020	-0.0637008	0.00245325	-25.9659	0.938286	0.933785	0.942808	4.61e-147	1	C09AA ACE inhibitors, plain [DG:DG01501]	F	p6m	Age_continuous	1.61e-146
C09AA	C09AA1:Age_continuous1	0.00193489	0.00699514	0.276604	1.00194	0.988293	1.01577	0.782	0	C09AA ACE inhibitors, plain [DG:DG01501]	F	p6m	Age_continuous	0.798
C09CA	C09CA	-0.934705	0.615502	-1.5186	0.392702	0.117524	1.3122	0.129	0	C09CA Angiotensin II receptor blockers, plain [DG:DG01495]	F	p6m	Age_continuous	0.169
C09CA	age_brith_to_2020	-0.0641282	0.00241491	-26.5551	0.937885	0.933456	0.942335	1.21e-153	1	C09CA Angiotensin II receptor blockers, plain [DG:DG01495]	F	p6m	Age_continuous	5.65e-153
C09CA	C09CA1:Age_continuous1	0.0111695	0.00892748	1.25114	1.01123	0.993691	1.02908	0.211	0	C09CA Angiotensin II receptor blockers, plain [DG:DG01495]	F	p6m	Age_continuous	0.261
C10AA	C10AA	-1.05215	0.370538	-2.83951	0.349187	0.168905	0.721894	0.00452	1	C10AA HMG CoA reductase inhibitors [DG:DG01660]	F	p6m	Age_continuous	0.00999
C10AA	age_brith_to_2020	-0.0660205	0.0026578	-24.8403	0.936112	0.931248	0.941001	7.02e-135	1	C10AA HMG CoA reductase inhibitors [DG:DG01660]	F	p6m	Age_continuous	2.11e-134
C10AA	C10AA1:Age_continuous1	0.0145492	0.00537884	2.70489	1.01466	1.00401	1.02541	0.00684	-1	C10AA HMG CoA reductase inhibitors [DG:DG01660]	F	p6m	Age_continuous	0.0131
G03CA	G03CA	-0.665318	0.796572	-0.835226	0.51411	0.107891	2.44978	0.404	0	G03CA Natural and semisynthetic estrogens, plain	F	p6m	Age_continuous	0.459
G03CA	age_brith_to_2020	-0.0643401	0.00238814	-26.9415	0.937686	0.933307	0.942085	4.88e-158	1	G03CA Natural and semisynthetic estrogens, plain	F	p6m	Age_continuous	6.53e-157
G03CA	G03CA1:Age_continuous1	0.00323815	0.0126332	0.256321	1.00324	0.978707	1.0284	0.798	0	G03CA Natural and semisynthetic estrogens, plain	F	p6m	Age_continuous	0.798
G04CB	G04CB	-6.64585	2.29915	-2.89057	0.0012994	1.43427e-05	0.117722	0.00385	1	G04CB Testosterone-5-alpha reductase inhibitors	F	p6m	Age_continuous	0.00898
G04CB	age_brith_to_2020	-0.0634215	0.00237149	-26.7434	0.938548	0.934195	0.942921	8.89e-156	1	G04CB Testosterone-5-alpha reductase inhibitors	F	p6m	Age_continuous	5.83e-155
G04CB	G04CB1:Age_continuous1	0.0838499	0.0306722	2.73374	1.08747	1.02401	1.15485	0.00626	-1	G04CB Testosterone-5-alpha reductase inhibitors	F	p6m	Age_continuous	0.0125
H03AA	H03AA	-1.17541	0.590436	-1.99075	0.308692	0.0970346	0.982032	0.0465	1	H03AA Thyroid hormones	F	p6m	Age_continuous	0.0781
H03AA	age_brith_to_2020	-0.06435	0.00241374	-26.6599	0.937677	0.933251	0.942123	7.88e-155	1	H03AA Thyroid hormones	F	p6m	Age_continuous	4.14e-154
H03AA	H03AA1:Age_continuous1	0.0144072	0.00879731	1.63769	1.01451	0.997168	1.03216	0.102	0	H03AA Thyroid hormones	F	p6m	Age_continuous	0.143
R03BA	R03BA	-1.5141	0.883973	-1.71283	0.220007	0.0389016	1.24424	0.0867	0	R03BA Glucocorticoids	F	p6m	Age_continuous	0.13
R03BA	age_brith_to_2020	-0.0641106	0.00238061	-26.9303	0.937901	0.933535	0.942288	6.56e-158	1	R03BA Glucocorticoids	F	p6m	Age_continuous	6.53e-157
R03BA	R03BA1:Age_continuous1	0.0214429	0.0132686	1.61606	1.02167	0.995446	1.04859	0.106	0	R03BA Glucocorticoids	F	p6m	Age_continuous	0.144
A02BC	A02BC	-1.23157	0.62214	-1.97956	0.291835	0.0862081	0.987932	0.0478	1	A02BC Proton pump inhibitors [DG:DG01646]	G	p6m	Age_continuous	0.0873
A02BC	age_brith_to_2020	-0.0245018	0.00451092	-5.43167	0.975796	0.967206	0.984462	5.63e-08	1	A02BC Proton pump inhibitors [DG:DG01646]	G	p6m	Age_continuous	1.82e-07
A02BC	A02BC1:Age_continuous1	0.0127283	0.00892447	1.42623	1.01281	0.995247	1.03068	0.154	0	A02BC Proton pump inhibitors [DG:DG01646]	G	p6m	Age_continuous	0.249
A03AA	A03AA	-2.89066	3.03787	-0.95154	0.0555398	0.000144097	21.407	0.341	0	A03AA Synthetic anticholinergics, esters with tertiary amino group	G	p6m	Age_continuous	0.448
A03AA	age_brith_to_2020	-0.02374	0.00411325	-5.7716	0.97654	0.968698	0.984444	7.93e-09	1	A03AA Synthetic anticholinergics, esters with tertiary amino group	G	p6m	Age_continuous	6.22e-08
A03AA	A03AA1:Age_continuous1	0.0381061	0.0429293	0.887647	1.03884	0.955006	1.13004	0.375	0	A03AA Synthetic anticholinergics, esters with tertiary amino group	G	p6m	Age_continuous	0.477
A10AE	A10AE	-4.13062	3.13529	-1.31746	0.0160729	3.44519e-05	7.49854	0.188	0	A10AE Insulins and analogues for injection, long-acting	G	p6m	Age_continuous	0.282
A10AE	age_brith_to_2020	-0.0239294	0.00411287	-5.81817	0.976355	0.968515	0.984257	6.01e-09	1	A10AE Insulins and analogues for injection, long-acting	G	p6m	Age_continuous	6.22e-08
A10AE	A10AE1:Age_continuous1	0.0559381	0.0441201	1.26786	1.05753	0.969922	1.15306	0.205	0	A10AE Insulins and analogues for injection, long-acting	G	p6m	Age_continuous	0.297
A10BA	A10BA	0.0140698	1.09501	0.012849	1.01417	0.118575	8.67415	0.99	0	A10BA Biguanides [DG:DG01684]	G	p6m	Age_continuous	0.99
A10BA	age_brith_to_2020	-0.0232791	0.00417322	-5.57821	0.97699	0.969031	0.985014	2.45e-08	1	A10BA Biguanides [DG:DG01684]	G	p6m	Age_continuous	1.03e-07
A10BA	A10BA1:Age_continuous1	-0.00235928	0.0158422	-0.148923	0.997644	0.967141	1.02911	0.882	0	A10BA Biguanides [DG:DG01684]	G	p6m	Age_continuous	0.95
B01AC	B01AC	-5.4753	1.15158	-4.75461	0.00418899	0.000438372	0.040029	2e-06	1	B01AC Platelet aggregation inhibitors excl. heparin	G	p6m	Age_continuous	5.6e-06
B01AC	age_brith_to_2020	-0.0280118	0.00424874	-6.59297	0.972377	0.964313	0.980508	4.39e-11	1	B01AC Platelet aggregation inhibitors excl. heparin	G	p6m	Age_continuous	1.84e-09
B01AC	B01AC1:Age_continuous1	0.0726029	0.0156124	4.65033	1.0753	1.0429	1.10872	3.33e-06	-1	B01AC Platelet aggregation inhibitors excl. heparin	G	p6m	Age_continuous	8.74e-06
C07AB	C07AB	-2.54685	1.06066	-2.40119	0.0783281	0.0097959	0.626313	0.0163	1	C07AB Beta blocking agents, selective	G	p6m	Age_continuous	0.036
C07AB	age_brith_to_2020	-0.0251051	0.0042279	-5.93795	0.975207	0.967159	0.983322	2.92e-09	1	C07AB Beta blocking agents, selective	G	p6m	Age_continuous	4.42e-08
C07AB	C07AB1:Age_continuous1	0.0318389	0.014647	2.17375	1.03235	1.00313	1.06242	0.0297	-1	C07AB Beta blocking agents, selective	G	p6m	Age_continuous	0.0624
C08CA	C08CA	-1.44858	0.845245	-1.7138	0.234904	0.0448111	1.23139	0.0866	0	C08CA Dihydropyridine derivatives [DG:DG01928]	G	p6m	Age_continuous	0.152
C08CA	age_brith_to_2020	-0.0246662	0.00428788	-5.75255	0.975636	0.96747	0.98387	8.88e-09	1	C08CA Dihydropyridine derivatives [DG:DG01928]	G	p6m	Age_continuous	6.22e-08
C08CA	C08CA1:Age_continuous1	0.017414	0.0119436	1.45801	1.01757	0.994022	1.04167	0.145	0	C08CA Dihydropyridine derivatives [DG:DG01928]	G	p6m	Age_continuous	0.244
C09AA	C09AA	-0.455231	0.865175	-0.526172	0.634302	0.116366	3.45752	0.599	0	C09AA ACE inhibitors, plain [DG:DG01501]	G	p6m	Age_continuous	0.699
C09AA	age_brith_to_2020	-0.0233588	0.00425748	-5.48653	0.976912	0.968794	0.985098	4.13e-08	1	C09AA ACE inhibitors, plain [DG:DG01501]	G	p6m	Age_continuous	1.45e-07
C09AA	C09AA1:Age_continuous1	0.00099144	0.0123612	0.0802056	1.00099	0.977031	1.02554	0.936	0	C09AA ACE inhibitors, plain [DG:DG01501]	G	p6m	Age_continuous	0.959
C09CA	C09CA	-1.05694	1.1074	-0.954436	0.347518	0.039657	3.04533	0.34	0	C09CA Angiotensin II receptor blockers, plain [DG:DG01495]	G	p6m	Age_continuous	0.448
C09CA	age_brith_to_2020	-0.0237657	0.00419933	-5.6594	0.976515	0.96851	0.984585	1.53e-08	1	C09CA Angiotensin II receptor blockers, plain [DG:DG01495]	G	p6m	Age_continuous	8.03e-08
C09CA	C09CA1:Age_continuous1	0.0103375	0.015606	0.662404	1.01039	0.979953	1.04177	0.508	0	C09CA Angiotensin II receptor blockers, plain [DG:DG01495]	G	p6m	Age_continuous	0.628
C10AA	C10AA	-2.17153	0.691375	-3.14089	0.114003	0.0294029	0.442018	0.00169	1	C10AA HMG CoA reductase inhibitors [DG:DG01660]	G	p6m	Age_continuous	0.00418
C10AA	age_brith_to_2020	-0.0242558	0.0045154	-5.3718	0.976036	0.967436	0.984713	7.86e-08	1	C10AA HMG CoA reductase inhibitors [DG:DG01660]	G	p6m	Age_continuous	2.36e-07
C10AA	C10AA1:Age_continuous1	0.0248503	0.00971063	2.55909	1.02516	1.00583	1.04486	0.0105	-1	C10AA HMG CoA reductase inhibitors [DG:DG01660]	G	p6m	Age_continuous	0.0245
G03CA	G03CA	-1.97778	1.47358	-1.34216	0.138376	0.00770351	2.4856	0.18	0	G03CA Natural and semisynthetic estrogens, plain	G	p6m	Age_continuous	0.28
G03CA	age_brith_to_2020	-0.0245791	0.0041484	-5.92498	0.97572	0.967819	0.983686	3.16e-09	1	G03CA Natural and semisynthetic estrogens, plain	G	p6m	Age_continuous	4.42e-08
G03CA	G03CA1:Age_continuous1	0.0246817	0.0220535	1.11917	1.02499	0.981627	1.07027	0.263	0	G03CA Natural and semisynthetic estrogens, plain	G	p6m	Age_continuous	0.368
G04CB	G04CB	-8.6156	4.11452	-2.09395	0.000181256	5.69978e-08	0.576405	0.0363	1	G04CB Testosterone-5-alpha reductase inhibitors	G	p6m	Age_continuous	0.0726
G04CB	age_brith_to_2020	-0.0232413	0.00412387	-5.63579	0.977027	0.969161	0.984956	1.76e-08	1	G04CB Testosterone-5-alpha reductase inhibitors	G	p6m	Age_continuous	8.21e-08
G04CB	G04CB1:Age_continuous1	0.107772	0.0538732	2.00047	1.11379	1.00218	1.23784	0.0455	-1	G04CB Testosterone-5-alpha reductase inhibitors	G	p6m	Age_continuous	0.0869
H03AA	H03AA	-0.279299	1.10677	-0.252356	0.756313	0.0864134	6.61946	0.801	0	H03AA Thyroid hormones	G	p6m	Age_continuous	0.885
H03AA	age_brith_to_2020	-0.0231971	0.00418179	-5.54717	0.97707	0.969094	0.985111	2.93e-08	1	H03AA Thyroid hormones	G	p6m	Age_continuous	1.12e-07
H03AA	H03AA1:Age_continuous1	-0.00189645	0.0161252	-0.117608	0.998105	0.967052	1.03016	0.906	0	H03AA Thyroid hormones	G	p6m	Age_continuous	0.951
R03BA	R03BA	-0.970702	1.76825	-0.548961	0.378817	0.0118365	12.1237	0.583	0	R03BA Glucocorticoids	G	p6m	Age_continuous	0.699
R03BA	age_brith_to_2020	-0.0235565	0.00412958	-5.70434	0.976719	0.968845	0.984657	1.18e-08	1	R03BA Glucocorticoids	G	p6m	Age_continuous	7.08e-08
R03BA	R03BA1:Age_continuous1	0.00876353	0.0259004	0.338354	1.0088	0.958867	1.06134	0.735	0	R03BA Glucocorticoids	G	p6m	Age_continuous	0.834
A02BC	A02BC	2.14131	2.52976	0.846446	8.51056	0.0597756	1211.69	0.397	0	A02BC Proton pump inhibitors [DG:DG01646]	H	p6m	Age_continuous	0.762
A02BC	age_brith_to_2020	0.125069	0.0208254	6.00557	1.13323	1.0879	1.18044	1.93e-09	-1	A02BC Proton pump inhibitors [DG:DG01646]	H	p6m	Age_continuous	6.24e-09
A02BC	A02BC1:Age_continuous1	-0.0292999	0.0337052	-0.869299	0.971125	0.909042	1.03745	0.385	0	A02BC Proton pump inhibitors [DG:DG01646]	H	p6m	Age_continuous	0.762
A03AA	A03AA	-5.62847	5731.4	-0.00098204	0.00359409	0	Inf	0.999	0	A03AA Synthetic anticholinergics, esters with tertiary amino group	H	p6m	Age_continuous	0.999
A03AA	age_brith_to_2020	0.115051	0.0170498	6.74792	1.12193	1.08506	1.16006	1.53e-11	-1	A03AA Synthetic anticholinergics, esters with tertiary amino group	H	p6m	Age_continuous	3.01e-10
A03AA	A03AA1:Age_continuous1	-0.118238	81.3717	-0.00145307	0.888484	4.80671e-70	1.6423e+69	0.999	0	A03AA Synthetic anticholinergics, esters with tertiary amino group	H	p6m	Age_continuous	0.999
A10AE	A10AE	-9.2996	11.0313	-0.843016	9.14606e-05	3.72321e-14	224673	0.399	0	A10AE Insulins and analogues for injection, long-acting	H	p6m	Age_continuous	0.762
A10AE	age_brith_to_2020	0.113111	0.0171414	6.5987	1.11976	1.08276	1.15802	4.22e-11	-1	A10AE Insulins and analogues for injection, long-acting	H	p6m	Age_continuous	3.54e-10
A10AE	A10AE1:Age_continuous1	0.130938	0.142508	0.918811	1.1399	0.862099	1.50721	0.358	0	A10AE Insulins and analogues for injection, long-acting	H	p6m	Age_continuous	0.762
A10BA	A10BA	-2.16027	5.21322	-0.414382	0.115294	4.20832e-06	3158.7	0.679	0	A10BA Biguanides [DG:DG01684]	H	p6m	Age_continuous	0.891
A10BA	age_brith_to_2020	0.113627	0.0174535	6.51026	1.12033	1.08266	1.15932	7.63e-11	-1	A10BA Biguanides [DG:DG01684]	H	p6m	Age_continuous	4.58e-10
A10BA	A10BA1:Age_continuous1	0.0244816	0.0687315	0.356192	1.02478	0.895623	1.17257	0.722	0	A10BA Biguanides [DG:DG01684]	H	p6m	Age_continuous	0.908
B01AC	B01AC	-6.44179	4.21664	-1.52771	0.00159356	4.10204e-07	6.19063	0.127	0	B01AC Platelet aggregation inhibitors excl. heparin	H	p6m	Age_continuous	0.333
B01AC	age_brith_to_2020	0.104977	0.017801	5.89721	1.11068	1.0726	1.15012	3.74e-09	-1	B01AC Platelet aggregation inhibitors excl. heparin	H	p6m	Age_continuous	1.12e-08
B01AC	B01AC1:Age_continuous1	0.0845353	0.0546705	1.54627	1.08821	0.977632	1.2113	0.122	0	B01AC Platelet aggregation inhibitors excl. heparin	H	p6m	Age_continuous	0.333
C07AB	C07AB	2.10665	3.11165	0.67702	8.22065	0.0184564	3661.54	0.498	0	C07AB Beta blocking agents, selective	H	p6m	Age_continuous	0.833
C07AB	age_brith_to_2020	0.119561	0.0187561	6.3745	1.127	1.08632	1.1692	1.87e-10	-1	C07AB Beta blocking agents, selective	H	p6m	Age_continuous	7.85e-10
C07AB	C07AB1:Age_continuous1	-0.0256393	0.0412239	-0.621952	0.974687	0.899029	1.05671	0.534	0	C07AB Beta blocking agents, selective	H	p6m	Age_continuous	0.833
C08CA	C08CA	3.16013	2.99375	1.05558	23.5738	0.0666854	8333.49	0.291	0	C08CA Dihydropyridine derivatives [DG:DG01928]	H	p6m	Age_continuous	0.679
C08CA	age_brith_to_2020	0.123556	0.0189013	6.53689	1.13151	1.09036	1.17422	6.39e-11	-1	C08CA Dihydropyridine derivatives [DG:DG01928]	H	p6m	Age_continuous	4.47e-10
C08CA	C08CA1:Age_continuous1	-0.0449359	0.0400463	-1.1221	0.956059	0.883885	1.03413	0.262	0	C08CA Dihydropyridine derivatives [DG:DG01928]	H	p6m	Age_continuous	0.647
C09AA	C09AA	-1.57536	3.78569	-0.416135	0.206933	0.000123964	345.432	0.677	0	C09AA ACE inhibitors, plain [DG:DG01501]	H	p6m	Age_continuous	0.891
C09AA	age_brith_to_2020	0.113397	0.018022	6.29216	1.12008	1.0812	1.16035	3.18e-10	-1	C09AA ACE inhibitors, plain [DG:DG01501]	H	p6m	Age_continuous	1.21e-09
C09AA	C09AA1:Age_continuous1	0.0151694	0.0498602	0.304238	1.01528	0.920757	1.11952	0.761	0	C09AA ACE inhibitors, plain [DG:DG01501]	H	p6m	Age_continuous	0.913
C09CA	C09CA	-0.546707	4.3564	-0.125495	0.578853	0.000113299	2957.4	0.9	0	C09CA Angiotensin II receptor blockers, plain [DG:DG01495]	H	p6m	Age_continuous	0.999
C09CA	age_brith_to_2020	0.114923	0.0177662	6.46864	1.12179	1.0834	1.16154	1.01e-10	-1	C09CA Angiotensin II receptor blockers, plain [DG:DG01495]	H	p6m	Age_continuous	4.71e-10
C09CA	C09CA1:Age_continuous1	0.0051519	0.0573991	0.0897558	1.00517	0.898208	1.12486	0.928	0	C09CA Angiotensin II receptor blockers, plain [DG:DG01495]	H	p6m	Age_continuous	0.999
C10AA	C10AA	1.33845	2.60574	0.513655	3.81313	0.0230767	630.073	0.608	0	C10AA HMG CoA reductase inhibitors [DG:DG01660]	H	p6m	Age_continuous	0.851
C10AA	age_brith_to_2020	0.123521	0.0204562	6.03832	1.13147	1.087	1.17776	1.58e-09	-1	C10AA HMG CoA reductase inhibitors [DG:DG01660]	H	p6m	Age_continuous	5.53e-09
C10AA	C10AA1:Age_continuous1	-0.0212415	0.0345726	-0.614403	0.978982	0.91484	1.04762	0.539	0	C10AA HMG CoA reductase inhibitors [DG:DG01660]	H	p6m	Age_continuous	0.833
G03CA	G03CA	-10.9055	16.9219	-0.64446	1.8357e-05	7.23105e-20	4.66015e+09	0.519	0	G03CA Natural and semisynthetic estrogens, plain	H	p6m	Age_continuous	0.833
G03CA	age_brith_to_2020	0.113428	0.0171036	6.63185	1.12011	1.08318	1.1583	3.38e-11	-1	G03CA Natural and semisynthetic estrogens, plain	H	p6m	Age_continuous	3.54e-10
G03CA	G03CA1:Age_continuous1	0.133482	0.219511	0.608087	1.1428	0.743214	1.75722	0.543	0	G03CA Natural and semisynthetic estrogens, plain	H	p6m	Age_continuous	0.833
G04CB	G04CB	-4.20495	12.4143	-0.33872	0.0149215	4.0393e-13	5.51211e+08	0.735	0	G04CB Testosterone-5-alpha reductase inhibitors	H	p6m	Age_continuous	0.908
G04CB	age_brith_to_2020	0.116791	0.0171735	6.80063	1.12388	1.08668	1.16236	1.06e-11	-1	G04CB Testosterone-5-alpha reductase inhibitors	H	p6m	Age_continuous	3.01e-10
G04CB	G04CB1:Age_continuous1	0.0425376	0.15997	0.265911	1.04346	0.762608	1.42773	0.79	0	G04CB Testosterone-5-alpha reductase inhibitors	H	p6m	Age_continuous	0.922
H03AA	H03AA	0.0620662	4.19471	0.0147963	1.06403	0.000285923	3959.69	0.988	0	H03AA Thyroid hormones	H	p6m	Age_continuous	0.999
H03AA	age_brith_to_2020	0.114983	0.0177574	6.47525	1.12185	1.08348	1.16159	9.63e-11	-1	H03AA Thyroid hormones	H	p6m	Age_continuous	4.71e-10
H03AA	H03AA1:Age_continuous1	0.00242229	0.0555976	0.0435683	1.00243	0.898928	1.11784	0.965	0	H03AA Thyroid hormones	H	p6m	Age_continuous	0.999
R03BA	R03BA	-12.2446	20.7442	-0.590264	4.81121e-06	1.05675e-23	2.19046e+12	0.555	0	R03BA Glucocorticoids	H	p6m	Age_continuous	0.833
R03BA	age_brith_to_2020	0.114328	0.0170673	6.69865	1.12112	1.08424	1.15926	2.15e-11	-1	R03BA Glucocorticoids	H	p6m	Age_continuous	3.01e-10
R03BA	R03BA1:Age_continuous1	0.148722	0.266742	0.557552	1.16035	0.687904	1.95727	0.577	0	R03BA Glucocorticoids	H	p6m	Age_continuous	0.836
A02BC	A02BC	-0.0779636	0.0984086	-0.792244	0.924998	0.762691	1.12185	0.428	0	A02BC Proton pump inhibitors [DG:DG01646]	A	p6m	Asthma	0.719
A02BC	Asthma	-0.0757725	0.125675	-0.602925	0.927027	0.724576	1.18604	0.547	0	A02BC Proton pump inhibitors [DG:DG01646]	A	p6m	Asthma	0.766
A02BC	A02BC1:Asthma1	-0.120351	0.234422	-0.513394	0.88661	0.559924	1.4039	0.608	0	A02BC Proton pump inhibitors [DG:DG01646]	A	p6m	Asthma	0.785
A03AA	A03AA	0.381513	0.480823	0.793458	1.4645	0.570535	3.7592	0.428	0	A03AA Synthetic anticholinergics, esters with tertiary amino group	A	p6m	Asthma	0.719
A03AA	Asthma	-0.100145	0.110337	-0.907636	0.904706	0.728717	1.1232	0.364	0	A03AA Synthetic anticholinergics, esters with tertiary amino group	A	p6m	Asthma	0.703
A03AA	A03AA1:Asthma1	-0.784754	1.09949	-0.713744	0.456232	0.0528448	3.93884	0.475	0	A03AA Synthetic anticholinergics, esters with tertiary amino group	A	p6m	Asthma	0.747
A10AE	A10AE	1.44986	0.869162	1.66811	4.2625	0.77553	23.4277	0.0954	0	A10AE Insulins and analogues for injection, long-acting	A	p6m	Asthma	0.624
A10AE	Asthma	-0.0957384	0.110163	-0.869063	0.908702	0.732185	1.12777	0.385	0	A10AE Insulins and analogues for injection, long-acting	A	p6m	Asthma	0.703
A10AE	A10AE1:Asthma1	-2.01322	1.19554	-1.68394	0.133559	0.0128147	1.39199	0.0923	0	A10AE Insulins and analogues for injection, long-acting	A	p6m	Asthma	0.624
A10BA	A10BA	-0.250762	0.208238	-1.20421	0.778207	0.517353	1.17059	0.229	0	A10BA Biguanides [DG:DG01684]	A	p6m	Asthma	0.703
A10BA	Asthma	-0.0592929	0.113579	-0.522039	0.942431	0.754293	1.17749	0.602	0	A10BA Biguanides [DG:DG01684]	A	p6m	Asthma	0.785
A10BA	A10BA1:Asthma1	-0.497069	0.385427	-1.28966	0.608311	0.285724	1.2951	0.197	0	A10BA Biguanides [DG:DG01684]	A	p6m	Asthma	0.703
B01AC	B01AC	-0.243727	0.150076	-1.62402	0.783702	0.583936	1.05181	0.104	0	B01AC Platelet aggregation inhibitors excl. heparin	A	p6m	Asthma	0.624
B01AC	Asthma	-0.126538	0.114994	-1.10039	0.881141	0.703284	1.10398	0.271	0	B01AC Platelet aggregation inhibitors excl. heparin	A	p6m	Asthma	0.703
B01AC	B01AC1:Asthma1	0.174576	0.349091	0.500087	1.19074	0.600588	2.3608	0.617	0	B01AC Platelet aggregation inhibitors excl. heparin	A	p6m	Asthma	0.785
C07AB	C07AB	-0.00417335	0.150026	-0.0278175	0.995835	0.742069	1.33638	0.978	0	C07AB Beta blocking agents, selective	A	p6m	Asthma	0.994
C07AB	Asthma	-0.101139	0.114137	-0.886121	0.903807	0.722589	1.13047	0.376	0	C07AB Beta blocking agents, selective	A	p6m	Asthma	0.703
C07AB	C07AB1:Asthma1	-0.0831504	0.375665	-0.221342	0.920213	0.440576	1.92201	0.825	0	C07AB Beta blocking agents, selective	A	p6m	Asthma	0.912
C08CA	C08CA	-0.268572	0.127538	-2.10582	0.764471	0.595341	0.981647	0.0353	1	C08CA Dihydropyridine derivatives [DG:DG01928]	A	p6m	Asthma	0.494
C08CA	Asthma	-0.131308	0.118302	-1.10994	0.876947	0.695413	1.10587	0.267	0	C08CA Dihydropyridine derivatives [DG:DG01928]	A	p6m	Asthma	0.703
C08CA	C08CA1:Asthma1	0.194361	0.292591	0.664277	1.21454	0.684349	2.15547	0.507	0	C08CA Dihydropyridine derivatives [DG:DG01928]	A	p6m	Asthma	0.76
C09AA	C09AA	-0.404952	0.135948	-2.97872	0.667009	0.510947	0.870738	0.00291	1	C09AA ACE inhibitors, plain [DG:DG01501]	A	p6m	Asthma	0.0611
C09AA	Asthma	-0.119857	0.11644	-1.02934	0.887048	0.705995	1.11453	0.303	0	C09AA ACE inhibitors, plain [DG:DG01501]	A	p6m	Asthma	0.703
C09AA	C09AA1:Asthma1	0.104878	0.314604	0.333366	1.11058	0.599339	2.0579	0.739	0	C09AA ACE inhibitors, plain [DG:DG01501]	A	p6m	Asthma	0.839
C09CA	C09CA	-0.291141	0.172879	-1.68407	0.74741	0.532547	1.04896	0.0922	0	C09CA Angiotensin II receptor blockers, plain [DG:DG01495]	A	p6m	Asthma	0.624
C09CA	Asthma	-0.106789	0.114352	-0.933862	0.898715	0.718215	1.12458	0.35	0	C09CA Angiotensin II receptor blockers, plain [DG:DG01495]	A	p6m	Asthma	0.703
C09CA	C09CA1:Asthma1	0.0559928	0.370346	0.151191	1.05759	0.511657	2.18603	0.88	0	C09CA Angiotensin II receptor blockers, plain [DG:DG01495]	A	p6m	Asthma	0.948
C10AA	C10AA	-0.603861	0.101951	-5.92304	0.546697	0.44765	0.66766	3.44e-09	1	C10AA HMG CoA reductase inhibitors [DG:DG01660]	A	p6m	Asthma	1.44e-07
C10AA	Asthma	-0.182037	0.126837	-1.43521	0.83357	0.650046	1.06891	0.151	0	C10AA HMG CoA reductase inhibitors [DG:DG01660]	A	p6m	Asthma	0.703
C10AA	C10AA1:Asthma1	0.262957	0.236739	1.11075	1.30077	0.817758	2.06908	0.267	0	C10AA HMG CoA reductase inhibitors [DG:DG01660]	A	p6m	Asthma	0.703
G03CA	G03CA	0.0838202	0.242158	0.346138	1.08743	0.676413	1.74821	0.729	0	G03CA Natural and semisynthetic estrogens, plain	A	p6m	Asthma	0.839
G03CA	Asthma	-0.107935	0.111795	-0.965471	0.897686	0.720997	1.11767	0.334	0	G03CA Natural and semisynthetic estrogens, plain	A	p6m	Asthma	0.703
G03CA	G03CA1:Asthma1	-0.00447403	0.556349	-0.00804177	0.995536	0.334458	2.96327	0.994	0	G03CA Natural and semisynthetic estrogens, plain	A	p6m	Asthma	0.994
G04CB	G04CB	-0.132493	0.338308	-0.391635	0.875909	0.451232	1.70027	0.695	0	G04CB Testosterone-5-alpha reductase inhibitors	A	p6m	Asthma	0.839
G04CB	Asthma	-0.102605	0.110302	-0.930218	0.902484	0.726977	1.12036	0.352	0	G04CB Testosterone-5-alpha reductase inhibitors	A	p6m	Asthma	0.703
G04CB	G04CB1:Asthma1	-0.641831	1.04144	-0.616295	0.526328	0.0683133	4.05516	0.538	0	G04CB Testosterone-5-alpha reductase inhibitors	A	p6m	Asthma	0.766
H03AA	H03AA	-0.221428	0.175916	-1.25872	0.801374	0.567607	1.13142	0.208	0	H03AA Thyroid hormones	A	p6m	Asthma	0.703
H03AA	Asthma	-0.0799208	0.113136	-0.706412	0.923189	0.739535	1.15245	0.48	0	H03AA Thyroid hormones	A	p6m	Asthma	0.747
H03AA	H03AA1:Asthma1	-0.448245	0.426552	-1.05086	0.638748	0.276779	1.4741	0.293	0	H03AA Thyroid hormones	A	p6m	Asthma	0.703
R03BA	R03BA	-0.620359	0.448808	-1.38224	0.537752	0.223067	1.29637	0.167	0	R03BA Glucocorticoids	A	p6m	Asthma	0.703
R03BA	Asthma	-0.0407454	0.114943	-0.354485	0.960074	0.766363	1.20275	0.723	0	R03BA Glucocorticoids	A	p6m	Asthma	0.839
R03BA	R03BA1:Asthma1	0.00647816	0.544735	0.0118923	1.0065	0.345929	2.92846	0.991	0	R03BA Glucocorticoids	A	p6m	Asthma	0.994
A02BC	A02BC	0.295021	0.218291	1.3515	1.34315	0.875502	2.0606	0.177	0	A02BC Proton pump inhibitors [DG:DG01646]	B	p6m	Asthma	0.486
A02BC	Asthma	-0.582956	0.439101	-1.32761	0.558246	0.236017	1.3204	0.184	0	A02BC Proton pump inhibitors [DG:DG01646]	B	p6m	Asthma	0.486
A02BC	A02BC1:Asthma1	-0.227583	0.660931	-0.344337	0.796456	0.217971	2.91021	0.731	0	A02BC Proton pump inhibitors [DG:DG01646]	B	p6m	Asthma	0.93
A03AA	A03AA	-14.4633	822.618	-0.0175821	5.2318e-07	0	Inf	0.986	0	A03AA Synthetic anticholinergics, esters with tertiary amino group	B	p6m	Asthma	0.999
A03AA	Asthma	-0.671586	0.340876	-1.97018	0.510898	0.261872	0.996735	0.0489	1	A03AA Synthetic anticholinergics, esters with tertiary amino group	B	p6m	Asthma	0.368
A03AA	A03AA1:Asthma1	1.59664	1614.43	0.000988979	4.9364	0	Inf	0.999	0	A03AA Synthetic anticholinergics, esters with tertiary amino group	B	p6m	Asthma	0.999
A10AE	A10AE	1.30399	0.882398	1.47778	3.68396	0.653099	20.7803	0.14	0	A10AE Insulins and analogues for injection, long-acting	B	p6m	Asthma	0.486
A10AE	Asthma	-0.661986	0.34579	-1.91442	0.515826	0.261862	1.01609	0.0556	0	A10AE Insulins and analogues for injection, long-acting	B	p6m	Asthma	0.368
A10AE	A10AE1:Asthma1	-0.672092	1.8226	-0.368754	0.510639	0.0143292	18.1973	0.712	0	A10AE Insulins and analogues for injection, long-acting	B	p6m	Asthma	0.93
A10BA	A10BA	-0.0933878	0.442883	-0.210863	0.91084	0.382244	2.17042	0.833	0	A10BA Biguanides [DG:DG01684]	B	p6m	Asthma	0.999
A10BA	Asthma	-0.490816	0.346817	-1.4152	0.612127	0.310125	1.20822	0.157	0	A10BA Biguanides [DG:DG01684]	B	p6m	Asthma	0.486
A10BA	A10BA1:Asthma1	-2.00059	1.73752	-1.1514	0.135255	0.00448441	4.07947	0.25	0	A10BA Biguanides [DG:DG01684]	B	p6m	Asthma	0.504
B01AC	B01AC	0.11201	0.272485	0.411069	1.11852	0.65559	1.90835	0.681	0	B01AC Platelet aggregation inhibitors excl. heparin	B	p6m	Asthma	0.93
B01AC	Asthma	-0.50715	0.360422	-1.4071	0.602209	0.29707	1.22078	0.16	0	B01AC Platelet aggregation inhibitors excl. heparin	B	p6m	Asthma	0.486
B01AC	B01AC1:Asthma1	-0.995063	1.01245	-0.98283	0.3697	0.0507903	2.69103	0.326	0	B01AC Platelet aggregation inhibitors excl. heparin	B	p6m	Asthma	0.548
C07AB	C07AB	0.644711	0.265361	2.42956	1.90544	1.13252	3.20584	0.0152	-1	C07AB Beta blocking agents, selective	B	p6m	Asthma	0.368
C07AB	Asthma	-0.524639	0.365023	-1.43728	0.591769	0.289298	1.21048	0.151	0	C07AB Beta blocking agents, selective	B	p6m	Asthma	0.486
C07AB	C07AB1:Asthma1	-0.765304	0.929893	-0.823002	0.465193	0.0751374	2.88011	0.411	0	C07AB Beta blocking agents, selective	B	p6m	Asthma	0.664
C08CA	C08CA	0.0531507	0.264434	0.200998	1.05459	0.62795	1.77109	0.841	0	C08CA Dihydropyridine derivatives [DG:DG01928]	B	p6m	Asthma	0.999
C08CA	Asthma	-0.465088	0.364755	-1.27507	0.62808	0.307211	1.28408	0.202	0	C08CA Dihydropyridine derivatives [DG:DG01928]	B	p6m	Asthma	0.499
C08CA	C08CA1:Asthma1	-1.08721	0.976516	-1.11335	0.337157	0.0497002	2.28721	0.266	0	C08CA Dihydropyridine derivatives [DG:DG01928]	B	p6m	Asthma	0.504
C09AA	C09AA	0.0231017	0.28382	0.0813958	1.02337	0.586636	1.78524	0.935	0	C09AA ACE inhibitors, plain [DG:DG01501]	B	p6m	Asthma	0.999
C09AA	Asthma	-0.470342	0.35452	-1.3267	0.624788	0.311795	1.25198	0.185	0	C09AA ACE inhibitors, plain [DG:DG01501]	B	p6m	Asthma	0.486
C09AA	C09AA1:Asthma1	-1.53517	1.27351	-1.20547	0.215419	0.0177391	2.61599	0.228	0	C09AA ACE inhibitors, plain [DG:DG01501]	B	p6m	Asthma	0.504
C09CA	C09CA	0.208012	0.324199	0.64162	1.23123	0.652068	2.32479	0.521	0	C09CA Angiotensin II receptor blockers, plain [DG:DG01495]	B	p6m	Asthma	0.81
C09CA	Asthma	-0.508663	0.34803	-1.46155	0.601299	0.303916	1.18967	0.144	0	C09CA Angiotensin II receptor blockers, plain [DG:DG01495]	B	p6m	Asthma	0.486
C09CA	C09CA1:Asthma1	-1.91498	1.71747	-1.115	0.147344	0.00508106	4.2728	0.265	0	C09CA Angiotensin II receptor blockers, plain [DG:DG01495]	B	p6m	Asthma	0.504
C10AA	C10AA	0.0741086	0.213622	0.346915	1.07692	0.708422	1.63711	0.729	0	C10AA HMG CoA reductase inhibitors [DG:DG01660]	B	p6m	Asthma	0.93
C10AA	Asthma	-0.172369	0.386984	-0.445417	0.841668	0.394127	1.79741	0.656	0	C10AA HMG CoA reductase inhibitors [DG:DG01660]	B	p6m	Asthma	0.93
C10AA	C10AA1:Asthma1	-1.48701	0.794331	-1.87203	0.226047	0.0476266	1.07287	0.0613	0	C10AA HMG CoA reductase inhibitors [DG:DG01660]	B	p6m	Asthma	0.368
G03CA	G03CA	-0.385134	0.974772	-0.395101	0.68036	0.100635	4.59969	0.693	0	G03CA Natural and semisynthetic estrogens, plain	B	p6m	Asthma	0.93
G03CA	Asthma	-0.655599	0.341139	-1.9218	0.519131	0.265955	1.01332	0.0547	0	G03CA Natural and semisynthetic estrogens, plain	B	p6m	Asthma	0.368
G03CA	G03CA1:Asthma1	-12.2537	737.366	-0.0166182	4.76763e-06	0	Inf	0.987	0	G03CA Natural and semisynthetic estrogens, plain	B	p6m	Asthma	0.999
G04CB	G04CB	-0.692117	0.634667	-1.09052	0.500515	0.144217	1.73707	0.276	0	G04CB Testosterone-5-alpha reductase inhibitors	B	p6m	Asthma	0.504
G04CB	Asthma	-0.654218	0.341648	-1.91489	0.519849	0.266056	1.01574	0.0556	0	G04CB Testosterone-5-alpha reductase inhibitors	B	p6m	Asthma	0.368
G04CB	G04CB1:Asthma1	-14.2298	1621.77	-0.00877424	6.60812e-07	0	Inf	0.993	0	G04CB Testosterone-5-alpha reductase inhibitors	B	p6m	Asthma	0.999
H03AA	H03AA	0.382113	0.380054	1.00542	1.46538	0.695576	3.08713	0.315	0	H03AA Thyroid hormones	B	p6m	Asthma	0.548
H03AA	Asthma	-0.828162	0.383113	-2.16166	0.436851	0.206122	0.925856	0.0307	1	H03AA Thyroid hormones	B	p6m	Asthma	0.368
H03AA	H03AA1:Asthma1	0.997752	0.837318	1.1916	2.71218	0.525251	14.0046	0.234	0	H03AA Thyroid hormones	B	p6m	Asthma	0.504
R03BA	R03BA	-14.3323	635.887	-0.0225392	5.96404e-07	0	Inf	0.982	0	R03BA Glucocorticoids	B	p6m	Asthma	0.999
R03BA	Asthma	-0.611051	0.358466	-1.70463	0.54278	0.268782	1.09609	0.0883	0	R03BA Glucocorticoids	B	p6m	Asthma	0.464
R03BA	R03BA1:Asthma1	13.7659	635.887	0.0216483	951584	0	Inf	0.983	0	R03BA Glucocorticoids	B	p6m	Asthma	0.999
A02BC	A02BC	0.295828	0.0782603	3.78005	1.34424	1.15308	1.56708	0.000157	-1	A02BC Proton pump inhibitors [DG:DG01646]	C	p6m	Asthma	0.00659
A02BC	Asthma	-0.0545265	0.101944	-0.534866	0.946933	0.775433	1.15636	0.593	0	A02BC Proton pump inhibitors [DG:DG01646]	C	p6m	Asthma	0.744
A02BC	A02BC1:Asthma1	-0.106171	0.180001	-0.589836	0.899271	0.631936	1.2797	0.555	0	A02BC Proton pump inhibitors [DG:DG01646]	C	p6m	Asthma	0.728
A03AA	A03AA	0.492223	0.339676	1.44909	1.63595	0.84069	3.18349	0.147	0	A03AA Synthetic anticholinergics, esters with tertiary amino group	C	p6m	Asthma	0.643
A03AA	Asthma	-0.0749837	0.0876137	-0.855844	0.927759	0.781372	1.10157	0.392	0	A03AA Synthetic anticholinergics, esters with tertiary amino group	C	p6m	Asthma	0.643
A03AA	A03AA1:Asthma1	-0.881929	0.92976	-0.948556	0.413984	0.0669218	2.56094	0.343	0	A03AA Synthetic anticholinergics, esters with tertiary amino group	C	p6m	Asthma	0.643
A10AE	A10AE	0.0576963	0.364642	0.158227	1.05939	0.518409	2.16492	0.874	0	A10AE Insulins and analogues for injection, long-acting	C	p6m	Asthma	0.93
A10AE	Asthma	-0.0876594	0.0879566	-0.996621	0.916073	0.771012	1.08843	0.319	0	A10AE Insulins and analogues for injection, long-acting	C	p6m	Asthma	0.643
A10AE	A10AE1:Asthma1	0.341494	0.688724	0.495836	1.40705	0.364808	5.42693	0.62	0	A10AE Insulins and analogues for injection, long-acting	C	p6m	Asthma	0.744
A10BA	A10BA	-0.116788	0.152409	-0.766278	0.889774	0.660007	1.19953	0.444	0	A10BA Biguanides [DG:DG01684]	C	p6m	Asthma	0.643
A10BA	Asthma	-0.0995163	0.0908532	-1.09535	0.905275	0.757611	1.08172	0.273	0	A10BA Biguanides [DG:DG01684]	C	p6m	Asthma	0.643
A10BA	A10BA1:Asthma1	0.193682	0.290895	0.665812	1.21371	0.686284	2.14648	0.505	0	A10BA Biguanides [DG:DG01684]	C	p6m	Asthma	0.684
B01AC	B01AC	0.0878609	0.112879	0.778365	1.09184	0.875134	1.3622	0.436	0	B01AC Platelet aggregation inhibitors excl. heparin	C	p6m	Asthma	0.643
B01AC	Asthma	-0.0790376	0.092156	-0.85765	0.924005	0.771313	1.10692	0.391	0	B01AC Platelet aggregation inhibitors excl. heparin	C	p6m	Asthma	0.643
B01AC	B01AC1:Asthma1	-0.0285371	0.250515	-0.113914	0.971866	0.594795	1.58798	0.909	0	B01AC Platelet aggregation inhibitors excl. heparin	C	p6m	Asthma	0.931
C07AB	C07AB	0.016177	0.113376	0.142684	1.01631	0.813803	1.26921	0.886	0	C07AB Beta blocking agents, selective	C	p6m	Asthma	0.93
C07AB	Asthma	-0.0923453	0.0913957	-1.01039	0.91179	0.762252	1.09066	0.312	0	C07AB Beta blocking agents, selective	C	p6m	Asthma	0.643
C07AB	C07AB1:Asthma1	0.109543	0.276243	0.396545	1.11577	0.649284	1.9174	0.692	0	C07AB Beta blocking agents, selective	C	p6m	Asthma	0.807
C08CA	C08CA	-0.120374	0.0999401	-1.20446	0.886589	0.728875	1.07843	0.228	0	C08CA Dihydropyridine derivatives [DG:DG01928]	C	p6m	Asthma	0.643
C08CA	Asthma	-0.141448	0.0948682	-1.491	0.8681	0.720805	1.0455	0.136	0	C08CA Dihydropyridine derivatives [DG:DG01928]	C	p6m	Asthma	0.643
C08CA	C08CA1:Asthma1	0.382569	0.220793	1.7327	1.46605	0.951059	2.25989	0.0832	0	C08CA Dihydropyridine derivatives [DG:DG01928]	C	p6m	Asthma	0.643
C09AA	C09AA	-0.338511	0.108176	-3.12925	0.712831	0.576642	0.881184	0.00175	1	C09AA ACE inhibitors, plain [DG:DG01501]	C	p6m	Asthma	0.0245
C09AA	Asthma	-0.122581	0.0930834	-1.3169	0.884634	0.737107	1.06169	0.188	0	C09AA ACE inhibitors, plain [DG:DG01501]	C	p6m	Asthma	0.643
C09AA	C09AA1:Asthma1	0.284837	0.241251	1.18067	1.32955	0.828608	2.13332	0.238	0	C09AA ACE inhibitors, plain [DG:DG01501]	C	p6m	Asthma	0.643
C09CA	C09CA	-0.178124	0.134546	-1.32388	0.836839	0.642859	1.08935	0.185	0	C09CA Angiotensin II receptor blockers, plain [DG:DG01495]	C	p6m	Asthma	0.643
C09CA	Asthma	-0.101931	0.0912742	-1.11676	0.903092	0.75516	1.08	0.264	0	C09CA Angiotensin II receptor blockers, plain [DG:DG01495]	C	p6m	Asthma	0.643
C09CA	C09CA1:Asthma1	0.217777	0.282471	0.770972	1.24331	0.714725	2.16281	0.441	0	C09CA Angiotensin II receptor blockers, plain [DG:DG01495]	C	p6m	Asthma	0.643
C10AA	C10AA	-0.275601	0.0798292	-3.45238	0.759116	0.649168	0.887685	0.000556	1	C10AA HMG CoA reductase inhibitors [DG:DG01660]	C	p6m	Asthma	0.0117
C10AA	Asthma	-0.145467	0.102085	-1.42495	0.864619	0.707831	1.05614	0.154	0	C10AA HMG CoA reductase inhibitors [DG:DG01660]	C	p6m	Asthma	0.643
C10AA	C10AA1:Asthma1	0.202776	0.180508	1.12337	1.2248	0.859836	1.74467	0.261	0	C10AA HMG CoA reductase inhibitors [DG:DG01660]	C	p6m	Asthma	0.643
G03CA	G03CA	0.277348	0.202018	1.37289	1.31963	0.888162	1.96069	0.17	0	G03CA Natural and semisynthetic estrogens, plain	C	p6m	Asthma	0.643
G03CA	Asthma	-0.0848442	0.0887308	-0.956198	0.918655	0.772013	1.09315	0.339	0	G03CA Natural and semisynthetic estrogens, plain	C	p6m	Asthma	0.643
G03CA	G03CA1:Asthma1	0.0333052	0.461603	0.0721512	1.03387	0.418356	2.55495	0.943	0	G03CA Natural and semisynthetic estrogens, plain	C	p6m	Asthma	0.943
G04CB	G04CB	-0.0675776	0.24126	-0.280103	0.934655	0.582492	1.49973	0.779	0	G04CB Testosterone-5-alpha reductase inhibitors	C	p6m	Asthma	0.884
G04CB	Asthma	-0.0737215	0.0877735	-0.839906	0.92893	0.782114	1.10331	0.401	0	G04CB Testosterone-5-alpha reductase inhibitors	C	p6m	Asthma	0.643
G04CB	G04CB1:Asthma1	-0.761278	0.827152	-0.92036	0.467069	0.0923221	2.36296	0.357	0	G04CB Testosterone-5-alpha reductase inhibitors	C	p6m	Asthma	0.643
H03AA	H03AA	-0.16713	0.142037	-1.17667	0.846089	0.640492	1.11768	0.239	0	H03AA Thyroid hormones	C	p6m	Asthma	0.643
H03AA	Asthma	-0.0753456	0.0896511	-0.840432	0.927423	0.777976	1.10558	0.401	0	H03AA Thyroid hormones	C	p6m	Asthma	0.643
H03AA	H03AA1:Asthma1	-0.178193	0.35037	-0.508586	0.836781	0.421091	1.66283	0.611	0	H03AA Thyroid hormones	C	p6m	Asthma	0.744
R03BA	R03BA	0.261543	0.375815	0.695934	1.29893	0.621858	2.7132	0.486	0	R03BA Glucocorticoids	C	p6m	Asthma	0.68
R03BA	Asthma	-0.0957553	0.0911251	-1.05081	0.908686	0.76006	1.08638	0.293	0	R03BA Glucocorticoids	C	p6m	Asthma	0.643
R03BA	R03BA1:Asthma1	-0.109981	0.452878	-0.242849	0.895851	0.36876	2.17634	0.808	0	R03BA Glucocorticoids	C	p6m	Asthma	0.893
A02BC	A02BC	0.463671	0.203749	2.27569	1.5899	1.06644	2.37029	0.0229	-1	A02BC Proton pump inhibitors [DG:DG01646]	D	p6m	Asthma	0.31
A02BC	Asthma	-0.58089	0.41898	-1.38644	0.5594	0.246085	1.27163	0.166	0	A02BC Proton pump inhibitors [DG:DG01646]	D	p6m	Asthma	0.436
A02BC	A02BC1:Asthma1	-0.152269	0.622956	-0.244429	0.858758	0.253284	2.91161	0.807	0	A02BC Proton pump inhibitors [DG:DG01646]	D	p6m	Asthma	1
A03AA	A03AA	-13.7288	664.108	-0.0206725	1.0906e-06	0	Inf	0.984	0	A03AA Synthetic anticholinergics, esters with tertiary amino group	D	p6m	Asthma	1
A03AA	Asthma	-0.644409	0.324192	-1.98774	0.524973	0.278088	0.991039	0.0468	1	A03AA Synthetic anticholinergics, esters with tertiary amino group	D	p6m	Asthma	0.31
A03AA	A03AA1:Asthma1	0.389683	1357.55	0.000287048	1.47651	0	Inf	1	0	A03AA Synthetic anticholinergics, esters with tertiary amino group	D	p6m	Asthma	1
A10AE	A10AE	0.926889	0.641008	1.44599	2.52664	0.719307	8.87506	0.148	0	A10AE Insulins and analogues for injection, long-acting	D	p6m	Asthma	0.414
A10AE	Asthma	-0.649997	0.330744	-1.96525	0.522047	0.27301	0.998254	0.0494	1	A10AE Insulins and analogues for injection, long-acting	D	p6m	Asthma	0.31
A10AE	A10AE1:Asthma1	0.154562	1.54346	0.10014	1.16715	0.0566668	24.0393	0.92	0	A10AE Insulins and analogues for injection, long-acting	D	p6m	Asthma	1
A10BA	A10BA	-0.139431	0.396469	-0.351681	0.869853	0.399917	1.892	0.725	0	A10BA Biguanides [DG:DG01684]	D	p6m	Asthma	0.982
A10BA	Asthma	-0.572417	0.328533	-1.74234	0.56416	0.296315	1.07412	0.0814	0	A10BA Biguanides [DG:DG01684]	D	p6m	Asthma	0.378
A10BA	A10BA1:Asthma1	-1.29156	1.70473	-0.757631	0.274842	0.00972764	7.76532	0.449	0	A10BA Biguanides [DG:DG01684]	D	p6m	Asthma	0.712
B01AC	B01AC	0.31022	0.244966	1.26638	1.36373	0.843744	2.20416	0.205	0	B01AC Platelet aggregation inhibitors excl. heparin	D	p6m	Asthma	0.478
B01AC	Asthma	-0.459804	0.341831	-1.34512	0.631407	0.323103	1.23389	0.179	0	B01AC Platelet aggregation inhibitors excl. heparin	D	p6m	Asthma	0.442
B01AC	B01AC1:Asthma1	-1.07382	0.97239	-1.10431	0.341699	0.0508091	2.29798	0.27	0	B01AC Platelet aggregation inhibitors excl. heparin	D	p6m	Asthma	0.567
C07AB	C07AB	0.451055	0.238989	1.88735	1.56997	0.982794	2.50795	0.0591	0	C07AB Beta blocking agents, selective	D	p6m	Asthma	0.31
C07AB	Asthma	-0.533596	0.348788	-1.52986	0.586492	0.296055	1.16185	0.126	0	C07AB Beta blocking agents, selective	D	p6m	Asthma	0.378
C07AB	C07AB1:Asthma1	-0.476302	0.872966	-0.545613	0.621076	0.112221	3.4373	0.585	0	C07AB Beta blocking agents, selective	D	p6m	Asthma	0.847
C08CA	C08CA	-0.0680871	0.243306	-0.279841	0.934179	0.579865	1.50499	0.78	0	C08CA Dihydropyridine derivatives [DG:DG01928]	D	p6m	Asthma	1
C08CA	Asthma	-0.557527	0.344906	-1.61646	0.572624	0.291262	1.12578	0.106	0	C08CA Dihydropyridine derivatives [DG:DG01928]	D	p6m	Asthma	0.378
C08CA	C08CA1:Asthma1	-0.591743	0.947298	-0.624664	0.553362	0.0864301	3.54285	0.532	0	C08CA Dihydropyridine derivatives [DG:DG01928]	D	p6m	Asthma	0.798
C09AA	C09AA	-0.273758	0.260662	-1.05024	0.760516	0.456281	1.26761	0.294	0	C09AA ACE inhibitors, plain [DG:DG01501]	D	p6m	Asthma	0.578
C09AA	Asthma	-0.542581	0.335682	-1.61635	0.581246	0.301041	1.12226	0.106	0	C09AA ACE inhibitors, plain [DG:DG01501]	D	p6m	Asthma	0.378
C09AA	C09AA1:Asthma1	-1.06644	1.24447	-0.856939	0.344233	0.0300298	3.94596	0.392	0	C09AA ACE inhibitors, plain [DG:DG01501]	D	p6m	Asthma	0.704
C09CA	C09CA	0.107498	0.290999	0.369409	1.11349	0.629486	1.96963	0.712	0	C09CA Angiotensin II receptor blockers, plain [DG:DG01495]	D	p6m	Asthma	0.982
C09CA	Asthma	-0.510548	0.330227	-1.54605	0.600167	0.314182	1.14647	0.122	0	C09CA Angiotensin II receptor blockers, plain [DG:DG01495]	D	p6m	Asthma	0.378
C09CA	C09CA1:Asthma1	-1.7404	1.69133	-1.02901	0.17545	0.00637506	4.82862	0.303	0	C09CA Angiotensin II receptor blockers, plain [DG:DG01495]	D	p6m	Asthma	0.578
C10AA	C10AA	-0.0212309	0.198679	-0.10686	0.978993	0.663229	1.44509	0.915	0	C10AA HMG CoA reductase inhibitors [DG:DG01660]	D	p6m	Asthma	1
C10AA	Asthma	-0.269435	0.363393	-0.741443	0.763811	0.374683	1.55707	0.458	0	C10AA HMG CoA reductase inhibitors [DG:DG01660]	D	p6m	Asthma	0.712
C10AA	C10AA1:Asthma1	-1.22699	0.765897	-1.60203	0.293174	0.0653419	1.31541	0.109	0	C10AA HMG CoA reductase inhibitors [DG:DG01660]	D	p6m	Asthma	0.378
G03CA	G03CA	-0.149931	0.938717	-0.159719	0.860768	0.136724	5.41908	0.873	0	G03CA Natural and semisynthetic estrogens, plain	D	p6m	Asthma	1
G03CA	Asthma	-0.631571	0.324511	-1.94622	0.531756	0.281506	1.00447	0.0516	0	G03CA Natural and semisynthetic estrogens, plain	D	p6m	Asthma	0.31
G03CA	G03CA1:Asthma1	-12.1772	649.044	-0.0187617	5.14655e-06	0	Inf	0.985	0	G03CA Natural and semisynthetic estrogens, plain	D	p6m	Asthma	1
G04CB	G04CB	-0.48835	0.582517	-0.838344	0.613638	0.195917	1.922	0.402	0	G04CB Testosterone-5-alpha reductase inhibitors	D	p6m	Asthma	0.704
G04CB	Asthma	-0.615788	0.324678	-1.89661	0.540215	0.28589	1.02078	0.0579	0	G04CB Testosterone-5-alpha reductase inhibitors	D	p6m	Asthma	0.31
G04CB	G04CB1:Asthma1	-13.5933	899.842	-0.0151063	1.24882e-06	0	Inf	0.988	0	G04CB Testosterone-5-alpha reductase inhibitors	D	p6m	Asthma	1
H03AA	H03AA	0.257228	0.342649	0.750703	1.29334	0.660767	2.53149	0.453	0	H03AA Thyroid hormones	D	p6m	Asthma	0.712
H03AA	Asthma	-0.787255	0.365713	-2.15266	0.455092	0.22223	0.931957	0.0314	1	H03AA Thyroid hormones	D	p6m	Asthma	0.31
H03AA	H03AA1:Asthma1	0.848997	0.761918	1.11429	2.3373	0.525009	10.4055	0.265	0	H03AA Thyroid hormones	D	p6m	Asthma	0.567
R03BA	R03BA	-13.5409	663.819	-0.0203984	1.31606e-06	0	Inf	0.984	0	R03BA Glucocorticoids	D	p6m	Asthma	1
R03BA	Asthma	-0.665321	0.338869	-1.96336	0.514108	0.264611	0.998853	0.0496	1	R03BA Glucocorticoids	D	p6m	Asthma	0.31
R03BA	R03BA1:Asthma1	13.661	663.819	0.0205793	856803	0	Inf	0.984	0	R03BA Glucocorticoids	D	p6m	Asthma	1
A02BC	A02BC	0.392875	0.0447756	8.77432	1.48123	1.35678	1.6171	1.73e-18	-1	A02BC Proton pump inhibitors [DG:DG01646]	E	p6m	Asthma	7.27e-17
A02BC	Asthma	-0.00332617	0.0540815	-0.061503	0.996679	0.89644	1.10813	0.951	0	A02BC Proton pump inhibitors [DG:DG01646]	E	p6m	Asthma	0.951
A02BC	A02BC1:Asthma1	-0.0843764	0.103644	-0.814099	0.919085	0.750125	1.1261	0.416	0	A02BC Proton pump inhibitors [DG:DG01646]	E	p6m	Asthma	0.791
A03AA	A03AA	0.236007	0.230953	1.02188	1.26618	0.805208	1.99106	0.307	0	A03AA Synthetic anticholinergics, esters with tertiary amino group	E	p6m	Asthma	0.791
A03AA	Asthma	-0.0219134	0.0477156	-0.45925	0.978325	0.890979	1.07423	0.646	0	A03AA Synthetic anticholinergics, esters with tertiary amino group	E	p6m	Asthma	0.848
A03AA	A03AA1:Asthma1	0.0288957	0.456894	0.0632438	1.02932	0.420377	2.52034	0.95	0	A03AA Synthetic anticholinergics, esters with tertiary amino group	E	p6m	Asthma	0.951
A10AE	A10AE	-0.553976	0.326249	-1.69802	0.57466	0.303184	1.08922	0.0895	0	A10AE Insulins and analogues for injection, long-acting	E	p6m	Asthma	0.418
A10AE	Asthma	-0.0289245	0.0477352	-0.605937	0.97149	0.88472	1.06677	0.545	0	A10AE Insulins and analogues for injection, long-acting	E	p6m	Asthma	0.791
A10AE	A10AE1:Asthma1	1.08275	0.504812	2.14486	2.95279	1.09783	7.94203	0.032	-1	A10AE Insulins and analogues for injection, long-acting	E	p6m	Asthma	0.224
A10BA	A10BA	0.0432774	0.095546	0.452948	1.04423	0.865896	1.25929	0.651	0	A10BA Biguanides [DG:DG01684]	E	p6m	Asthma	0.848
A10BA	Asthma	-0.0458322	0.0491398	-0.93269	0.955202	0.867496	1.05178	0.351	0	A10BA Biguanides [DG:DG01684]	E	p6m	Asthma	0.791
A10BA	A10BA1:Asthma1	0.393398	0.174769	2.25096	1.48201	1.05217	2.08744	0.0244	-1	A10BA Biguanides [DG:DG01684]	E	p6m	Asthma	0.205
B01AC	B01AC	0.263399	0.0700013	3.76277	1.30135	1.13451	1.49272	0.000168	-1	B01AC Platelet aggregation inhibitors excl. heparin	E	p6m	Asthma	0.00277
B01AC	Asthma	-0.0105429	0.0492577	-0.214036	0.989512	0.898448	1.08981	0.831	0	B01AC Platelet aggregation inhibitors excl. heparin	E	p6m	Asthma	0.932
B01AC	B01AC1:Asthma1	-0.101215	0.162824	-0.621621	0.903739	0.65682	1.24348	0.534	0	B01AC Platelet aggregation inhibitors excl. heparin	E	p6m	Asthma	0.791
C07AB	C07AB	0.094081	0.0712671	1.32012	1.09865	0.955424	1.26334	0.187	0	C07AB Beta blocking agents, selective	E	p6m	Asthma	0.714
C07AB	Asthma	-0.0296195	0.049117	-0.603039	0.970815	0.881714	1.06892	0.546	0	C07AB Beta blocking agents, selective	E	p6m	Asthma	0.791
C07AB	C07AB1:Asthma1	0.173079	0.173823	0.995722	1.18896	0.845685	1.67158	0.319	0	C07AB Beta blocking agents, selective	E	p6m	Asthma	0.791
C08CA	C08CA	0.0789927	0.0576018	1.37136	1.0822	0.966663	1.21154	0.17	0	C08CA Dihydropyridine derivatives [DG:DG01928]	E	p6m	Asthma	0.714
C08CA	Asthma	-0.0481735	0.0506403	-0.951288	0.952968	0.862926	1.05241	0.342	0	C08CA Dihydropyridine derivatives [DG:DG01928]	E	p6m	Asthma	0.791
C08CA	C08CA1:Asthma1	0.225739	0.132908	1.69846	1.25325	0.96584	1.62618	0.0894	0	C08CA Dihydropyridine derivatives [DG:DG01928]	E	p6m	Asthma	0.418
C09AA	C09AA	-0.0372743	0.0602853	-0.618298	0.963412	0.856046	1.08424	0.536	0	C09AA ACE inhibitors, plain [DG:DG01501]	E	p6m	Asthma	0.791
C09AA	Asthma	-0.0346252	0.0501535	-0.690384	0.965967	0.875531	1.06575	0.49	0	C09AA ACE inhibitors, plain [DG:DG01501]	E	p6m	Asthma	0.791
C09AA	C09AA1:Asthma1	0.117459	0.140762	0.834455	1.12464	0.853483	1.48193	0.404	0	C09AA ACE inhibitors, plain [DG:DG01501]	E	p6m	Asthma	0.791
C09CA	C09CA	0.0337468	0.0782563	0.431234	1.03432	0.887246	1.20578	0.666	0	C09CA Angiotensin II receptor blockers, plain [DG:DG01495]	E	p6m	Asthma	0.848
C09CA	Asthma	-0.0342299	0.0492716	-0.694719	0.966349	0.877393	1.06433	0.487	0	C09CA Angiotensin II receptor blockers, plain [DG:DG01495]	E	p6m	Asthma	0.791
C09CA	C09CA1:Asthma1	0.17052	0.168058	1.01465	1.18592	0.853109	1.64857	0.31	0	C09CA Angiotensin II receptor blockers, plain [DG:DG01495]	E	p6m	Asthma	0.791
C10AA	C10AA	0.134819	0.0447358	3.01367	1.14433	1.04827	1.2492	0.00258	-1	C10AA HMG CoA reductase inhibitors [DG:DG01660]	E	p6m	Asthma	0.0271
C10AA	Asthma	-0.013325	0.0536272	-0.248474	0.986763	0.888312	1.09613	0.804	0	C10AA HMG CoA reductase inhibitors [DG:DG01660]	E	p6m	Asthma	0.932
C10AA	C10AA1:Asthma1	-0.0209862	0.105609	-0.198716	0.979233	0.796143	1.20443	0.843	0	C10AA HMG CoA reductase inhibitors [DG:DG01660]	E	p6m	Asthma	0.932
G03CA	G03CA	0.188227	0.103185	1.82417	1.20711	0.986085	1.47767	0.0681	0	G03CA Natural and semisynthetic estrogens, plain	E	p6m	Asthma	0.409
G03CA	Asthma	-0.0245104	0.0483592	-0.50684	0.975788	0.887548	1.0728	0.612	0	G03CA Natural and semisynthetic estrogens, plain	E	p6m	Asthma	0.848
G03CA	G03CA1:Asthma1	0.0768552	0.237808	0.323182	1.07989	0.677571	1.72108	0.747	0	G03CA Natural and semisynthetic estrogens, plain	E	p6m	Asthma	0.896
G04CB	G04CB	-0.0249767	0.161811	-0.154357	0.975333	0.710262	1.33933	0.877	0	G04CB Testosterone-5-alpha reductase inhibitors	E	p6m	Asthma	0.944
G04CB	Asthma	-0.0186803	0.0477127	-0.391517	0.981493	0.893869	1.07771	0.695	0	G04CB Testosterone-5-alpha reductase inhibitors	E	p6m	Asthma	0.859
G04CB	G04CB1:Asthma1	-0.291233	0.469586	-0.62019	0.747342	0.297718	1.876	0.535	0	G04CB Testosterone-5-alpha reductase inhibitors	E	p6m	Asthma	0.791
H03AA	H03AA	-0.00638741	0.075715	-0.0843613	0.993633	0.856598	1.15259	0.933	0	H03AA Thyroid hormones	E	p6m	Asthma	0.951
H03AA	Asthma	-0.0312322	0.0491709	-0.635176	0.969251	0.8802	1.06731	0.525	0	H03AA Thyroid hormones	E	p6m	Asthma	0.791
H03AA	H03AA1:Asthma1	0.143037	0.172308	0.830123	1.15377	0.823096	1.6173	0.406	0	H03AA Thyroid hormones	E	p6m	Asthma	0.791
R03BA	R03BA	0.661591	0.177775	3.72151	1.93787	1.36774	2.74567	0.000198	-1	R03BA Glucocorticoids	E	p6m	Asthma	0.00277
R03BA	Asthma	-0.0613202	0.0500764	-1.22453	0.940522	0.852597	1.03751	0.221	0	R03BA Glucocorticoids	E	p6m	Asthma	0.773
R03BA	R03BA1:Asthma1	-0.218298	0.218264	-1.00016	0.803886	0.524091	1.23305	0.317	0	R03BA Glucocorticoids	E	p6m	Asthma	0.791
A02BC	A02BC	-0.314528	0.0469936	-6.693	0.730133	0.665885	0.80058	2.22e-11	1	A02BC Proton pump inhibitors [DG:DG01646]	F	p6m	Asthma	9.32e-10
A02BC	Asthma	-0.0379411	0.0592799	-0.640033	0.96277	0.857159	1.08139	0.522	0	A02BC Proton pump inhibitors [DG:DG01646]	F	p6m	Asthma	0.672
A02BC	A02BC1:Asthma1	-0.0290101	0.111015	-0.261318	0.971407	0.781451	1.20754	0.794	0	A02BC Proton pump inhibitors [DG:DG01646]	F	p6m	Asthma	0.838
A03AA	A03AA	-0.377866	0.242376	-1.55901	0.685322	0.426163	1.10208	0.119	0	A03AA Synthetic anticholinergics, esters with tertiary amino group	F	p6m	Asthma	0.357
A03AA	Asthma	-0.045047	0.0518282	-0.86916	0.955953	0.863611	1.05817	0.385	0	A03AA Synthetic anticholinergics, esters with tertiary amino group	F	p6m	Asthma	0.578
A03AA	A03AA1:Asthma1	-0.12319	0.480836	-0.2562	0.884096	0.344504	2.26884	0.798	0	A03AA Synthetic anticholinergics, esters with tertiary amino group	F	p6m	Asthma	0.838
A10AE	A10AE	-0.949115	0.338724	-2.80203	0.387083	0.199283	0.751863	0.00508	1	A10AE Insulins and analogues for injection, long-acting	F	p6m	Asthma	0.0376
A10AE	Asthma	-0.0550737	0.0518305	-1.06257	0.946415	0.854992	1.04762	0.288	0	A10AE Insulins and analogues for injection, long-acting	F	p6m	Asthma	0.504
A10AE	A10AE1:Asthma1	1.01066	0.540834	1.8687	2.74741	0.951802	7.93049	0.0617	0	A10AE Insulins and analogues for injection, long-acting	F	p6m	Asthma	0.236
A10BA	A10BA	-0.0362464	0.103704	-0.349516	0.964403	0.787013	1.18178	0.727	0	A10BA Biguanides [DG:DG01684]	F	p6m	Asthma	0.804
A10BA	Asthma	-0.0726016	0.0532816	-1.3626	0.929971	0.83775	1.03234	0.173	0	A10BA Biguanides [DG:DG01684]	F	p6m	Asthma	0.426
A10BA	A10BA1:Asthma1	0.397961	0.193521	2.05642	1.48879	1.01883	2.17553	0.0398	-1	A10BA Biguanides [DG:DG01684]	F	p6m	Asthma	0.175
B01AC	B01AC	-0.117151	0.0731548	-1.60141	0.889451	0.770638	1.02658	0.109	0	B01AC Platelet aggregation inhibitors excl. heparin	F	p6m	Asthma	0.352
B01AC	Asthma	-0.0422267	0.0536245	-0.787451	0.958652	0.863007	1.0649	0.431	0	B01AC Platelet aggregation inhibitors excl. heparin	F	p6m	Asthma	0.589
B01AC	B01AC1:Asthma1	-0.0816536	0.173222	-0.471382	0.921591	0.656275	1.29417	0.637	0	B01AC Platelet aggregation inhibitors excl. heparin	F	p6m	Asthma	0.723
C07AB	C07AB	-0.27293	0.074075	-3.6845	0.761146	0.658284	0.880083	0.000229	1	C07AB Beta blocking agents, selective	F	p6m	Asthma	0.00321
C07AB	Asthma	-0.0699931	0.0534725	-1.30896	0.9324	0.839624	1.03543	0.191	0	C07AB Beta blocking agents, selective	F	p6m	Asthma	0.426
C07AB	C07AB1:Asthma1	0.20183	0.185262	1.08943	1.22364	0.851045	1.75936	0.276	0	C07AB Beta blocking agents, selective	F	p6m	Asthma	0.504
C08CA	C08CA	-0.124956	0.0613191	-2.0378	0.882536	0.782592	0.995243	0.0416	1	C08CA Dihydropyridine derivatives [DG:DG01928]	F	p6m	Asthma	0.175
C08CA	Asthma	-0.0793862	0.0551015	-1.44073	0.923683	0.829122	1.02903	0.15	0	C08CA Dihydropyridine derivatives [DG:DG01928]	F	p6m	Asthma	0.394
C08CA	C08CA1:Asthma1	0.243813	0.143539	1.69858	1.27611	0.963165	1.69072	0.0894	0	C08CA Dihydropyridine derivatives [DG:DG01928]	F	p6m	Asthma	0.313
C09AA	C09AA	-0.177951	0.063913	-2.78426	0.836984	0.738435	0.948685	0.00537	1	C09AA ACE inhibitors, plain [DG:DG01501]	F	p6m	Asthma	0.0376
C09AA	Asthma	-0.0656556	0.0545425	-1.20375	0.936453	0.841507	1.04211	0.229	0	C09AA ACE inhibitors, plain [DG:DG01501]	F	p6m	Asthma	0.458
C09AA	C09AA1:Asthma1	0.14399	0.151567	0.950008	1.15487	0.858054	1.55437	0.342	0	C09AA ACE inhibitors, plain [DG:DG01501]	F	p6m	Asthma	0.552
C09CA	C09CA	-0.223227	0.0830512	-2.68783	0.799933	0.679763	0.941347	0.0072	1	C09CA Angiotensin II receptor blockers, plain [DG:DG01495]	F	p6m	Asthma	0.0432
C09CA	Asthma	-0.0682537	0.0535796	-1.27387	0.934024	0.840909	1.03745	0.203	0	C09CA Angiotensin II receptor blockers, plain [DG:DG01495]	F	p6m	Asthma	0.426
C09CA	C09CA1:Asthma1	0.274802	0.181	1.51825	1.31627	0.923149	1.8768	0.129	0	C09CA Angiotensin II receptor blockers, plain [DG:DG01495]	F	p6m	Asthma	0.361
C10AA	C10AA	-0.0608485	0.0477428	-1.27451	0.940966	0.856906	1.03327	0.203	0	C10AA HMG CoA reductase inhibitors [DG:DG01660]	F	p6m	Asthma	0.426
C10AA	Asthma	-0.0519422	0.058539	-0.887309	0.949384	0.846469	1.06481	0.375	0	C10AA HMG CoA reductase inhibitors [DG:DG01660]	F	p6m	Asthma	0.578
C10AA	C10AA1:Asthma1	0.00955237	0.113512	0.0841529	1.0096	0.808208	1.26117	0.933	0	C10AA HMG CoA reductase inhibitors [DG:DG01660]	F	p6m	Asthma	0.946
G03CA	G03CA	-0.487324	0.109032	-4.46956	0.614268	0.496074	0.760623	7.87e-06	1	G03CA Natural and semisynthetic estrogens, plain	F	p6m	Asthma	0.000165
G03CA	Asthma	-0.0534885	0.0525925	-1.01704	0.947917	0.85507	1.05085	0.309	0	G03CA Natural and semisynthetic estrogens, plain	F	p6m	Asthma	0.519
G03CA	G03CA1:Asthma1	0.139186	0.251631	0.553134	1.14934	0.70186	1.88211	0.58	0	G03CA Natural and semisynthetic estrogens, plain	F	p6m	Asthma	0.696
G04CB	G04CB	-0.410399	0.168113	-2.44121	0.663386	0.477158	0.922295	0.0146	1	G04CB Testosterone-5-alpha reductase inhibitors	F	p6m	Asthma	0.0766
G04CB	Asthma	-0.0429264	0.051893	-0.827209	0.957982	0.865335	1.06055	0.408	0	G04CB Testosterone-5-alpha reductase inhibitors	F	p6m	Asthma	0.589
G04CB	G04CB1:Asthma1	-0.37686	0.48284	-0.780507	0.686012	0.26627	1.76743	0.435	0	G04CB Testosterone-5-alpha reductase inhibitors	F	p6m	Asthma	0.589
H03AA	H03AA	-0.240396	0.0805045	-2.98613	0.786316	0.671535	0.920715	0.00283	1	H03AA Thyroid hormones	F	p6m	Asthma	0.0297
H03AA	Asthma	-0.0582235	0.0535	-1.08829	0.943439	0.849518	1.04774	0.277	0	H03AA Thyroid hormones	F	p6m	Asthma	0.504
H03AA	H03AA1:Asthma1	0.11199	0.184425	0.607237	1.1185	0.779198	1.60556	0.544	0	H03AA Thyroid hormones	F	p6m	Asthma	0.672
R03BA	R03BA	-0.096072	0.191029	-0.502918	0.908399	0.624692	1.32095	0.615	0	R03BA Glucocorticoids	F	p6m	Asthma	0.718
R03BA	Asthma	-0.0339872	0.0546055	-0.622414	0.966584	0.868475	1.07578	0.534	0	R03BA Glucocorticoids	F	p6m	Asthma	0.672
R03BA	R03BA1:Asthma1	-0.0159593	0.234623	-0.0680211	0.984167	0.621369	1.55879	0.946	0	R03BA Glucocorticoids	F	p6m	Asthma	0.946
A02BC	A02BC	-0.346807	0.0786769	-4.40799	0.706942	0.605914	0.824815	1.05e-05	1	A02BC Proton pump inhibitors [DG:DG01646]	G	p6m	Asthma	0.00022
A02BC	Asthma	-0.102007	0.104941	-0.972041	0.903023	0.735139	1.10925	0.331	0	A02BC Proton pump inhibitors [DG:DG01646]	G	p6m	Asthma	0.455
A02BC	A02BC1:Asthma1	-0.0358054	0.184821	-0.19373	0.964828	0.671619	1.38604	0.846	0	A02BC Proton pump inhibitors [DG:DG01646]	G	p6m	Asthma	0.911
A03AA	A03AA	-0.0720124	0.347165	-0.20743	0.930519	0.4712	1.83758	0.836	0	A03AA Synthetic anticholinergics, esters with tertiary amino group	G	p6m	Asthma	0.911
A03AA	Asthma	-0.105721	0.0898903	-1.17611	0.899675	0.754341	1.07301	0.24	0	A03AA Synthetic anticholinergics, esters with tertiary amino group	G	p6m	Asthma	0.403
A03AA	A03AA1:Asthma1	-0.906613	0.941325	-0.963124	0.40389	0.0638221	2.55596	0.336	0	A03AA Synthetic anticholinergics, esters with tertiary amino group	G	p6m	Asthma	0.455
A10AE	A10AE	-0.328443	0.375222	-0.875331	0.720044	0.345109	1.50232	0.381	0	A10AE Insulins and analogues for injection, long-acting	G	p6m	Asthma	0.5
A10AE	Asthma	-0.120157	0.0902237	-1.33177	0.886781	0.743044	1.05832	0.183	0	A10AE Insulins and analogues for injection, long-acting	G	p6m	Asthma	0.403
A10AE	A10AE1:Asthma1	0.340781	0.714986	0.476627	1.40605	0.346239	5.70983	0.634	0	A10AE Insulins and analogues for injection, long-acting	G	p6m	Asthma	0.747
A10BA	A10BA	-0.188784	0.157362	-1.19968	0.827965	0.608218	1.12711	0.23	0	A10BA Biguanides [DG:DG01684]	G	p6m	Asthma	0.403
A10BA	Asthma	-0.133034	0.0931736	-1.42781	0.875435	0.729308	1.05084	0.153	0	A10BA Biguanides [DG:DG01684]	G	p6m	Asthma	0.378
A10BA	A10BA1:Asthma1	0.213763	0.303283	0.704829	1.23833	0.683392	2.24389	0.481	0	A10BA Biguanides [DG:DG01684]	G	p6m	Asthma	0.594
B01AC	B01AC	-0.234388	0.114341	-2.04991	0.791054	0.63223	0.989778	0.0404	1	B01AC Platelet aggregation inhibitors excl. heparin	G	p6m	Asthma	0.212
B01AC	Asthma	-0.120644	0.0946894	-1.2741	0.886349	0.73621	1.06711	0.203	0	B01AC Platelet aggregation inhibitors excl. heparin	G	p6m	Asthma	0.403
B01AC	B01AC1:Asthma1	0.0176931	0.257756	0.0686429	1.01785	0.614147	1.68693	0.945	0	B01AC Platelet aggregation inhibitors excl. heparin	G	p6m	Asthma	0.961
C07AB	C07AB	-0.289308	0.114364	-2.52971	0.748781	0.598417	0.936928	0.0114	1	C07AB Beta blocking agents, selective	G	p6m	Asthma	0.0684
C07AB	Asthma	-0.139541	0.0938833	-1.48633	0.869757	0.723571	1.04548	0.137	0	C07AB Beta blocking agents, selective	G	p6m	Asthma	0.36
C07AB	C07AB1:Asthma1	0.129731	0.284756	0.455585	1.13852	0.651547	1.98947	0.649	0	C07AB Beta blocking agents, selective	G	p6m	Asthma	0.747
C08CA	C08CA	-0.297796	0.102069	-2.91759	0.742453	0.607833	0.906889	0.00353	1	C08CA Dihydropyridine derivatives [DG:DG01928]	G	p6m	Asthma	0.0362
C08CA	Asthma	-0.178784	0.0973501	-1.83651	0.836286	0.691014	1.0121	0.0663	0	C08CA Dihydropyridine derivatives [DG:DG01928]	G	p6m	Asthma	0.25
C08CA	C08CA1:Asthma1	0.411479	0.228171	1.80338	1.50905	0.964885	2.3601	0.0713	0	C08CA Dihydropyridine derivatives [DG:DG01928]	G	p6m	Asthma	0.25
C09AA	C09AA	-0.436579	0.109914	-3.97202	0.646243	0.520995	0.801602	7.14e-05	1	C09AA ACE inhibitors, plain [DG:DG01501]	G	p6m	Asthma	0.001
C09AA	Asthma	-0.156659	0.0956136	-1.63846	0.854995	0.708882	1.03123	0.101	0	C09AA ACE inhibitors, plain [DG:DG01501]	G	p6m	Asthma	0.303
C09AA	C09AA1:Asthma1	0.300161	0.248271	1.209	1.35008	0.829889	2.19632	0.227	0	C09AA ACE inhibitors, plain [DG:DG01501]	G	p6m	Asthma	0.403
C09CA	C09CA	-0.391633	0.137183	-2.85482	0.675952	0.516584	0.884487	0.00431	1	C09CA Angiotensin II receptor blockers, plain [DG:DG01495]	G	p6m	Asthma	0.0362
C09CA	Asthma	-0.142938	0.0937638	-1.52445	0.866808	0.721286	1.04169	0.127	0	C09CA Angiotensin II receptor blockers, plain [DG:DG01495]	G	p6m	Asthma	0.356
C09CA	C09CA1:Asthma1	0.319946	0.290744	1.10044	1.37705	0.778858	2.43469	0.271	0	C09CA Angiotensin II receptor blockers, plain [DG:DG01495]	G	p6m	Asthma	0.422
C10AA	C10AA	-0.458536	0.0816944	-5.61282	0.632208	0.538665	0.741996	2.01e-08	1	C10AA HMG CoA reductase inhibitors [DG:DG01660]	G	p6m	Asthma	8.44e-07
C10AA	Asthma	-0.191024	0.104763	-1.82339	0.826113	0.672762	1.01442	0.0683	0	C10AA HMG CoA reductase inhibitors [DG:DG01660]	G	p6m	Asthma	0.25
C10AA	C10AA1:Asthma1	0.23415	0.185796	1.26026	1.26383	0.878079	1.81906	0.208	0	C10AA HMG CoA reductase inhibitors [DG:DG01660]	G	p6m	Asthma	0.403
G03CA	G03CA	-0.370845	0.204898	-1.8099	0.690151	0.461878	1.03124	0.0703	0	G03CA Natural and semisynthetic estrogens, plain	G	p6m	Asthma	0.25
G03CA	Asthma	-0.117518	0.0910847	-1.2902	0.889125	0.743752	1.06291	0.197	0	G03CA Natural and semisynthetic estrogens, plain	G	p6m	Asthma	0.403
G03CA	G03CA1:Asthma1	0.0597968	0.468608	0.127605	1.06162	0.423713	2.65991	0.898	0	G03CA Natural and semisynthetic estrogens, plain	G	p6m	Asthma	0.943
G04CB	G04CB	-0.414544	0.245839	-1.68625	0.660641	0.408036	1.06963	0.0918	0	G04CB Testosterone-5-alpha reductase inhibitors	G	p6m	Asthma	0.297
G04CB	Asthma	-0.102281	0.0901466	-1.1346	0.902776	0.756561	1.07725	0.257	0	G04CB Testosterone-5-alpha reductase inhibitors	G	p6m	Asthma	0.415
G04CB	G04CB1:Asthma1	-0.849739	0.834875	-1.0178	0.427527	0.0832312	2.19604	0.309	0	G04CB Testosterone-5-alpha reductase inhibitors	G	p6m	Asthma	0.448
H03AA	H03AA	-0.382015	0.144586	-2.64213	0.682485	0.514063	0.906087	0.00824	1	H03AA Thyroid hormones	G	p6m	Asthma	0.0577
H03AA	Asthma	-0.110181	0.0921281	-1.19596	0.895672	0.747697	1.07293	0.232	0	H03AA Thyroid hormones	G	p6m	Asthma	0.403
H03AA	H03AA1:Asthma1	-0.157883	0.356987	-0.442266	0.853949	0.424181	1.71915	0.658	0	H03AA Thyroid hormones	G	p6m	Asthma	0.747
R03BA	R03BA	-0.394442	0.38177	-1.03319	0.674056	0.318947	1.42453	0.301	0	R03BA Glucocorticoids	G	p6m	Asthma	0.448
R03BA	Asthma	-0.0742161	0.0938754	-0.790581	0.928471	0.772428	1.11604	0.429	0	R03BA Glucocorticoids	G	p6m	Asthma	0.546
R03BA	R03BA1:Asthma1	0.0226153	0.460757	0.0490829	1.02287	0.41458	2.52369	0.961	0	R03BA Glucocorticoids	G	p6m	Asthma	0.961
A02BC	A02BC	-0.0478915	0.20275	-0.23621	0.953237	0.640638	1.41837	0.813	0	A02BC Proton pump inhibitors [DG:DG01646]	H	p6m	Asthma	1
A02BC	Asthma	-0.658398	0.424896	-1.54955	0.51768	0.225099	1.19056	0.121	0	A02BC Proton pump inhibitors [DG:DG01646]	H	p6m	Asthma	0.391
A02BC	A02BC1:Asthma1	-0.0749532	0.631151	-0.118756	0.927787	0.26927	3.19675	0.905	0	A02BC Proton pump inhibitors [DG:DG01646]	H	p6m	Asthma	1
A03AA	A03AA	-14.307	692.532	-0.020659	6.11691e-07	0	Inf	0.984	0	A03AA Synthetic anticholinergics, esters with tertiary amino group	H	p6m	Asthma	1
A03AA	Asthma	-0.68638	0.328773	-2.0877	0.503395	0.264268	0.958901	0.0368	1	A03AA Synthetic anticholinergics, esters with tertiary amino group	H	p6m	Asthma	0.341
A03AA	A03AA1:Asthma1	0.595775	1340.47	0.000444452	1.81444	0	Inf	1	0	A03AA Synthetic anticholinergics, esters with tertiary amino group	H	p6m	Asthma	1
A10AE	A10AE	0.603152	0.650454	0.927278	1.82787	0.510803	6.5409	0.354	0	A10AE Insulins and analogues for injection, long-acting	H	p6m	Asthma	0.743
A10AE	Asthma	-0.703486	0.335091	-2.09939	0.494857	0.256588	0.954383	0.0358	1	A10AE Insulins and analogues for injection, long-acting	H	p6m	Asthma	0.341
A10AE	A10AE1:Asthma1	0.428996	1.56723	0.27373	1.53572	0.0711585	33.1432	0.784	0	A10AE Insulins and analogues for injection, long-acting	H	p6m	Asthma	1
A10BA	A10BA	-0.225781	0.403353	-0.55976	0.797893	0.361905	1.75912	0.576	0	A10BA Biguanides [DG:DG01684]	H	p6m	Asthma	0.834
A10BA	Asthma	-0.62328	0.334166	-1.86518	0.536183	0.278521	1.03221	0.0622	0	A10BA Biguanides [DG:DG01684]	H	p6m	Asthma	0.341
A10BA	A10BA1:Asthma1	-1.23417	1.71394	-0.720076	0.291077	0.0101165	8.37497	0.471	0	A10BA Biguanides [DG:DG01684]	H	p6m	Asthma	0.761
B01AC	B01AC	0.101478	0.246264	0.412072	1.10681	0.683033	1.7935	0.68	0	B01AC Platelet aggregation inhibitors excl. heparin	H	p6m	Asthma	0.921
B01AC	Asthma	-0.512815	0.346307	-1.48081	0.598807	0.303737	1.18053	0.139	0	B01AC Platelet aggregation inhibitors excl. heparin	H	p6m	Asthma	0.406
B01AC	B01AC1:Asthma1	-1.0747	0.983674	-1.09254	0.341399	0.04965	2.34749	0.275	0	B01AC Platelet aggregation inhibitors excl. heparin	H	p6m	Asthma	0.642
C07AB	C07AB	0.204255	0.241325	0.846389	1.22661	0.764331	1.96848	0.397	0	C07AB Beta blocking agents, selective	H	p6m	Asthma	0.758
C07AB	Asthma	-0.601746	0.352702	-1.7061	0.547854	0.27443	1.0937	0.088	0	C07AB Beta blocking agents, selective	H	p6m	Asthma	0.341
C07AB	C07AB1:Asthma1	-0.454558	0.888082	-0.511842	0.634729	0.111331	3.61875	0.609	0	C07AB Beta blocking agents, selective	H	p6m	Asthma	0.853
C08CA	C08CA	-0.159628	0.246427	-0.64777	0.852461	0.525904	1.38179	0.517	0	C08CA Dihydropyridine derivatives [DG:DG01928]	H	p6m	Asthma	0.784
C08CA	Asthma	-0.600768	0.349472	-1.71907	0.54839	0.276443	1.08786	0.0856	0	C08CA Dihydropyridine derivatives [DG:DG01928]	H	p6m	Asthma	0.341
C08CA	C08CA1:Asthma1	-0.612053	0.958753	-0.638384	0.542237	0.0828057	3.55073	0.523	0	C08CA Dihydropyridine derivatives [DG:DG01928]	H	p6m	Asthma	0.784
C09AA	C09AA	-0.359509	0.263161	-1.36612	0.698019	0.41673	1.16918	0.172	0	C09AA ACE inhibitors, plain [DG:DG01501]	H	p6m	Asthma	0.432
C09AA	Asthma	-0.585963	0.340885	-1.71895	0.55657	0.285328	1.08566	0.0856	0	C09AA ACE inhibitors, plain [DG:DG01501]	H	p6m	Asthma	0.341
C09AA	C09AA1:Asthma1	-1.07912	1.25306	-0.861188	0.339895	0.0291537	3.96276	0.389	0	C09AA ACE inhibitors, plain [DG:DG01501]	H	p6m	Asthma	0.758
C09CA	C09CA	-0.0498283	0.293436	-0.16981	0.951393	0.535274	1.691	0.865	0	C09CA Angiotensin II receptor blockers, plain [DG:DG01495]	H	p6m	Asthma	1
C09CA	Asthma	-0.555728	0.335136	-1.65821	0.573654	0.297419	1.10645	0.0973	0	C09CA Angiotensin II receptor blockers, plain [DG:DG01495]	H	p6m	Asthma	0.341
C09CA	C09CA1:Asthma1	-1.72804	1.69752	-1.01798	0.177633	0.00637574	4.94899	0.309	0	C09CA Angiotensin II receptor blockers, plain [DG:DG01495]	H	p6m	Asthma	0.683
C10AA	C10AA	-0.155716	0.201826	-0.771536	0.855802	0.576197	1.27109	0.44	0	C10AA HMG CoA reductase inhibitors [DG:DG01660]	H	p6m	Asthma	0.761
C10AA	Asthma	-0.289258	0.366553	-0.78913	0.748819	0.36505	1.53603	0.43	0	C10AA HMG CoA reductase inhibitors [DG:DG01660]	H	p6m	Asthma	0.761
C10AA	C10AA1:Asthma1	-1.31392	0.775044	-1.69528	0.268765	0.0588336	1.22778	0.09	0	C10AA HMG CoA reductase inhibitors [DG:DG01660]	H	p6m	Asthma	0.341
G03CA	G03CA	-0.702512	0.940876	-0.746657	0.49534	0.0783415	3.13194	0.455	0	G03CA Natural and semisynthetic estrogens, plain	H	p6m	Asthma	0.761
G03CA	Asthma	-0.674708	0.329021	-2.05065	0.509305	0.267241	0.970631	0.0403	1	G03CA Natural and semisynthetic estrogens, plain	H	p6m	Asthma	0.341
G03CA	G03CA1:Asthma1	-12.3045	688.135	-0.017881	4.53121e-06	0	Inf	0.986	0	G03CA Natural and semisynthetic estrogens, plain	H	p6m	Asthma	1
G04CB	G04CB	-0.799128	0.588759	-1.35731	0.449721	0.14183	1.426	0.175	0	G04CB Testosterone-5-alpha reductase inhibitors	H	p6m	Asthma	0.432
G04CB	Asthma	-0.651635	0.329712	-1.97638	0.521193	0.273108	0.994632	0.0481	1	G04CB Testosterone-5-alpha reductase inhibitors	H	p6m	Asthma	0.341
G04CB	G04CB1:Asthma1	-12.8029	581.625	-0.0220123	2.75282e-06	0	Inf	0.982	0	G04CB Testosterone-5-alpha reductase inhibitors	H	p6m	Asthma	1
H03AA	H03AA	0.0758283	0.348624	0.217508	1.07878	0.544715	2.13646	0.828	0	H03AA Thyroid hormones	H	p6m	Asthma	1
H03AA	Asthma	-0.866872	0.371459	-2.33369	0.420264	0.202919	0.870408	0.0196	1	H03AA Thyroid hormones	H	p6m	Asthma	0.341
H03AA	H03AA1:Asthma1	1.12113	0.770243	1.45555	3.06831	0.678013	13.8855	0.145	0	H03AA Thyroid hormones	H	p6m	Asthma	0.406
R03BA	R03BA	-14.133	668.206	-0.0211507	7.27967e-07	0	Inf	0.983	0	R03BA Glucocorticoids	H	p6m	Asthma	1
R03BA	Asthma	-0.672833	0.345533	-1.94723	0.510261	0.259216	1.00444	0.0515	0	R03BA Glucocorticoids	H	p6m	Asthma	0.341
R03BA	R03BA1:Asthma1	13.847	668.207	0.0207226	1.03196e+06	0	Inf	0.984	0	R03BA Glucocorticoids	H	p6m	Asthma	1
A02BC	A02BC	0.869591	0.512287	1.69747	2.38593	0.873898	6.51412	0.08969	0	A02BC Proton pump inhibitors [DG:DG01646]	A	p6m	BMI	0.556
A02BC	A02BC1:bmi	-0.0338115	0.0176767	-1.91277	0.966754	0.933823	1.00085	0.05585	0	A02BC Proton pump inhibitors [DG:DG01646]	A	p6m	BMI	0.556
A02BC	bmi	0.0183942	0.00935856	1.96549	1.01856	1.00005	1.03743	0.04943	-1	A02BC Proton pump inhibitors [DG:DG01646]	A	p6m	BMI	0.556
A03AA	bmi	0.0109062	0.00824359	1.32299	1.01097	0.994758	1.02744	0.1859	0	A03AA Synthetic anticholinergics, esters with tertiary amino group	A	p6m	BMI	0.556
A03AA	A03AA	4.57352	2.75845	1.658	96.8842	0.434022	21626.9	0.0974	0	A03AA Synthetic anticholinergics, esters with tertiary amino group	A	p6m	BMI	0.556
A03AA	A03AA1:bmi	-0.145809	0.0933826	-1.56141	0.864323	0.71972	1.03798	0.1185	0	A03AA Synthetic anticholinergics, esters with tertiary amino group	A	p6m	BMI	0.556
A10AE	bmi	0.00937979	0.00818084	1.14656	1.00942	0.993363	1.02574	0.2516	0	A10AE Insulins and analogues for injection, long-acting	A	p6m	BMI	0.556
A10AE	A10AE	2.55919	3.17721	0.805485	12.9254	0.0254768	6557.55	0.4206	0	A10AE Insulins and analogues for injection, long-acting	A	p6m	BMI	0.565
A10AE	A10AE1:bmi	-0.0609271	0.093238	-0.653458	0.940892	0.783701	1.12961	0.5135	0	A10AE Insulins and analogues for injection, long-acting	A	p6m	BMI	0.612
A10BA	A10BA1:bmi	-0.0355168	0.028873	-1.23011	0.965106	0.911991	1.02132	0.2187	0	A10BA Biguanides [DG:DG01684]	A	p6m	BMI	0.556
A10BA	A10BA	0.760466	0.930063	0.81765	2.13927	0.345418	13.2491	0.4136	0	A10BA Biguanides [DG:DG01684]	A	p6m	BMI	0.565
A10BA	bmi	0.013509	0.00855778	1.57857	1.0136	0.996736	1.03075	0.1145	0	A10BA Biguanides [DG:DG01684]	A	p6m	BMI	0.556
B01AC	B01AC	1.08192	0.775614	1.39492	2.95034	0.644852	13.4985	0.1631	0	B01AC Platelet aggregation inhibitors excl. heparin	A	p6m	BMI	0.556
B01AC	bmi	0.0131153	0.00847573	1.5474	1.0132	0.996504	1.03018	0.1219	0	B01AC Platelet aggregation inhibitors excl. heparin	A	p6m	BMI	0.556
B01AC	B01AC1:bmi	-0.0451774	0.0266396	-1.69587	0.955828	0.907187	1.00708	0.08999	0	B01AC Platelet aggregation inhibitors excl. heparin	A	p6m	BMI	0.556
C07AB	bmi	0.00992445	0.00855611	1.15993	1.00997	0.993173	1.02706	0.2462	0	C07AB Beta blocking agents, selective	A	p6m	BMI	0.556
C07AB	C07AB	0.189144	0.769283	0.24587	1.20821	0.267376	5.45966	0.8058	0	C07AB Beta blocking agents, selective	A	p6m	BMI	0.825
C07AB	C07AB1:bmi	-0.00693982	0.0255496	-0.271621	0.993084	0.944564	1.0441	0.7859	0	C07AB Beta blocking agents, selective	A	p6m	BMI	0.825
C08CA	C08CA1:bmi	-0.023995	0.0227678	-1.0539	0.976291	0.933669	1.02086	0.292	0	C08CA Dihydropyridine derivatives [DG:DG01928]	A	p6m	BMI	0.565
C08CA	C08CA	0.46717	0.675194	0.691905	1.59547	0.424602	5.99511	0.489	0	C08CA Dihydropyridine derivatives [DG:DG01928]	A	p6m	BMI	0.604
C08CA	bmi	0.0129203	0.00870724	1.48386	1.013	0.995858	1.03045	0.1379	0	C08CA Dihydropyridine derivatives [DG:DG01928]	A	p6m	BMI	0.556
C09AA	C09AA1:bmi	-0.0178192	0.0241896	-0.736648	0.982339	0.936838	1.03005	0.4614	0	C09AA ACE inhibitors, plain [DG:DG01501]	A	p6m	BMI	0.587
C09AA	C09AA	0.138213	0.722926	0.191185	1.14822	0.278275	4.73778	0.8484	0	C09AA ACE inhibitors, plain [DG:DG01501]	A	p6m	BMI	0.848
C09AA	bmi	0.011879	0.00865167	1.37303	1.01195	0.99493	1.02926	0.1698	0	C09AA ACE inhibitors, plain [DG:DG01501]	A	p6m	BMI	0.556
C09CA	bmi	0.00857923	0.0084148	1.01954	1.00862	0.992113	1.02539	0.308	0	C09CA Angiotensin II receptor blockers, plain [DG:DG01495]	A	p6m	BMI	0.565
C09CA	C09CA1:bmi	0.0191432	0.0311652	0.614247	1.01933	0.958909	1.08355	0.5391	0	C09CA Angiotensin II receptor blockers, plain [DG:DG01495]	A	p6m	BMI	0.612
C09CA	C09CA	-0.854261	0.949596	-0.899604	0.425598	0.0661373	2.73875	0.3684	0	C09CA Angiotensin II receptor blockers, plain [DG:DG01495]	A	p6m	BMI	0.565
C10AA	bmi	0.0135414	0.00930028	1.45602	1.01363	0.995318	1.03229	0.1455	0	C10AA HMG CoA reductase inhibitors [DG:DG01660]	A	p6m	BMI	0.556
C10AA	C10AA1:bmi	-0.011185	0.0179148	-0.624345	0.988877	0.954747	1.02423	0.5324	0	C10AA HMG CoA reductase inhibitors [DG:DG01660]	A	p6m	BMI	0.612
C10AA	C10AA	-0.24343	0.52333	-0.465156	0.783934	0.280983	2.18716	0.6418	0	C10AA HMG CoA reductase inhibitors [DG:DG01660]	A	p6m	BMI	0.709
G03CA	bmi	0.0103714	0.00827149	1.25387	1.01043	0.994171	1.02694	0.21	0	G03CA Natural and semisynthetic estrogens, plain	A	p6m	BMI	0.556
G03CA	G03CA1:bmi	-0.0377369	0.0478821	-0.78812	0.962966	0.876679	1.05775	0.4307	0	G03CA Natural and semisynthetic estrogens, plain	A	p6m	BMI	0.565
G03CA	G03CA	1.06674	1.26036	0.846376	2.90588	0.245539	34.3902	0.3974	0	G03CA Natural and semisynthetic estrogens, plain	A	p6m	BMI	0.565
G04CB	G04CB	2.11147	2.43079	0.868639	8.26041	0.0703493	969.937	0.3851	0	G04CB Testosterone-5-alpha reductase inhibitors	A	p6m	BMI	0.565
G04CB	bmi	0.00975707	0.00818313	1.19234	1.0098	0.993733	1.02614	0.2332	0	G04CB Testosterone-5-alpha reductase inhibitors	A	p6m	BMI	0.556
G04CB	G04CB1:bmi	-0.0806986	0.0842426	-0.957931	0.922472	0.782029	1.08814	0.3382	0	G04CB Testosterone-5-alpha reductase inhibitors	A	p6m	BMI	0.565
H03AA	bmi	0.00772873	0.00846105	0.913448	1.00776	0.991179	1.02462	0.3611	0	H03AA Thyroid hormones	A	p6m	BMI	0.565
H03AA	H03AA1:bmi	0.02452	0.0287125	0.853984	1.02482	0.968726	1.08417	0.3932	0	H03AA Thyroid hormones	A	p6m	BMI	0.565
H03AA	H03AA	-1.00888	0.848689	-1.18875	0.364628	0.0690582	1.92523	0.2346	0	H03AA Thyroid hormones	A	p6m	BMI	0.556
R03BA	R03BA	-1.11288	1.24773	-0.891929	0.32861	0.0284627	3.79388	0.3725	0	R03BA Glucocorticoids	A	p6m	BMI	0.565
R03BA	bmi	0.00851731	0.00828572	1.02795	1.00855	0.992302	1.02507	0.304	0	R03BA Glucocorticoids	A	p6m	BMI	0.565
R03BA	R03BA1:bmi	0.0170048	0.0416408	0.408369	1.01715	0.937409	1.10367	0.683	0	R03BA Glucocorticoids	A	p6m	BMI	0.736
A02BC	A02BC	-0.14862	1.23773	-0.120074	0.861897	0.0761313	9.7577	0.9044	0	A02BC Proton pump inhibitors [DG:DG01646]	B	p6m	BMI	0.95
A02BC	A02BC1:bmi	0.0144295	0.0418638	0.344677	1.01453	0.934589	1.10132	0.7304	0	A02BC Proton pump inhibitors [DG:DG01646]	B	p6m	BMI	0.799
A02BC	bmi	0.0259849	0.0260403	0.997872	1.02633	0.975242	1.08008	0.3184	0	A02BC Proton pump inhibitors [DG:DG01646]	B	p6m	BMI	0.581
A03AA	A03AA	-15.506	3823.01	-0.00405598	1.8442e-07	0	Inf	0.9968	0	A03AA Synthetic anticholinergics, esters with tertiary amino group	B	p6m	BMI	1
A03AA	A03AA1:bmi	0.0425585	119.528	0.000356055	1.04348	1.75318e-102	6.21068e+101	0.9997	0	A03AA Synthetic anticholinergics, esters with tertiary amino group	B	p6m	BMI	1
A03AA	bmi	0.0317154	0.0212271	1.4941	1.03222	0.990147	1.07609	0.1352	0	A03AA Synthetic anticholinergics, esters with tertiary amino group	B	p6m	BMI	0.384
A10AE	A10AE1:bmi	-0.0565352	0.125259	-0.451346	0.945033	0.739252	1.2081	0.6518	0	A10AE Insulins and analogues for injection, long-acting	B	p6m	BMI	0.797
A10AE	A10AE	2.90904	3.98927	0.729215	18.3391	0.00735584	45722.1	0.4659	0	A10AE Insulins and analogues for injection, long-acting	B	p6m	BMI	0.783
A10AE	bmi	0.0322108	0.0213835	1.50634	1.03274	0.990334	1.07695	0.1321	0	A10AE Insulins and analogues for injection, long-acting	B	p6m	BMI	0.384
A10BA	bmi	0.0350145	0.0219529	1.59498	1.03563	0.992006	1.08118	0.1108	0	A10BA Biguanides [DG:DG01684]	B	p6m	BMI	0.384
A10BA	A10BA	0.940702	2.42466	0.387972	2.56178	0.0220807	297.215	0.6981	0	A10BA Biguanides [DG:DG01684]	B	p6m	BMI	0.797
A10BA	A10BA1:bmi	-0.0401737	0.077523	-0.518216	0.960623	0.825172	1.11831	0.6043	0	A10BA Biguanides [DG:DG01684]	B	p6m	BMI	0.797
B01AC	B01AC1:bmi	-0.101994	0.0568523	-1.79402	0.903035	0.807786	1.00951	0.07289	0	B01AC Platelet aggregation inhibitors excl. heparin	B	p6m	BMI	0.384
B01AC	bmi	0.0470593	0.0225682	2.0852	1.04818	1.00282	1.0956	0.03712	-1	B01AC Platelet aggregation inhibitors excl. heparin	B	p6m	BMI	0.384
B01AC	B01AC	2.96108	1.62687	1.82011	19.3188	0.7957	469.041	0.06882	0	B01AC Platelet aggregation inhibitors excl. heparin	B	p6m	BMI	0.384
C07AB	bmi	0.0491013	0.0236807	2.07348	1.05033	1.00268	1.10024	0.03819	-1	C07AB Beta blocking agents, selective	B	p6m	BMI	0.384
C07AB	C07AB1:bmi	-0.0959149	0.0503213	-1.90605	0.908541	0.823185	1.00275	0.05672	0	C07AB Beta blocking agents, selective	B	p6m	BMI	0.384
C07AB	C07AB	3.40209	1.4832	2.29375	30.0268	1.63911	550.058	0.02186	-1	C07AB Beta blocking agents, selective	B	p6m	BMI	0.384
C08CA	bmi	0.02687	0.0232112	1.15763	1.02723	0.981535	1.07506	0.2471	0	C08CA Dihydropyridine derivatives [DG:DG01928]	B	p6m	BMI	0.494
C08CA	C08CA1:bmi	0.023989	0.052078	0.460635	1.02428	0.924859	1.13439	0.6451	0	C08CA Dihydropyridine derivatives [DG:DG01928]	B	p6m	BMI	0.797
C08CA	C08CA	-0.75505	1.56458	-0.482589	0.469987	0.0218722	10.099	0.6294	0	C08CA Dihydropyridine derivatives [DG:DG01928]	B	p6m	BMI	0.797
C09AA	C09AA	-0.654633	1.71366	-0.382008	0.519633	0.0180536	14.9565	0.7025	0	C09AA ACE inhibitors, plain [DG:DG01501]	B	p6m	BMI	0.797
C09AA	C09AA1:bmi	0.018597	0.0564739	0.329302	1.01877	0.911991	1.13805	0.7419	0	C09AA ACE inhibitors, plain [DG:DG01501]	B	p6m	BMI	0.799
C09AA	bmi	0.028441	0.0229364	1.24	1.02885	0.983608	1.07617	0.2151	0	C09AA ACE inhibitors, plain [DG:DG01501]	B	p6m	BMI	0.452
C09CA	bmi	0.0346119	0.0223322	1.54986	1.03522	0.99087	1.08155	0.1213	0	C09CA Angiotensin II receptor blockers, plain [DG:DG01495]	B	p6m	BMI	0.384
C09CA	C09CA1:bmi	-0.0338364	0.0663392	-0.510052	0.96673	0.848827	1.10101	0.61	0	C09CA Angiotensin II receptor blockers, plain [DG:DG01495]	B	p6m	BMI	0.797
C09CA	C09CA	1.0841	2.00818	0.539841	2.95677	0.057665	151.608	0.5893	0	C09CA Angiotensin II receptor blockers, plain [DG:DG01495]	B	p6m	BMI	0.797
C10AA	bmi	0.0387579	0.026068	1.4868	1.03952	0.987725	1.09403	0.1371	0	C10AA HMG CoA reductase inhibitors [DG:DG01660]	B	p6m	BMI	0.384
C10AA	C10AA	0.525149	1.21668	0.431624	1.69071	0.155633	18.3669	0.666	0	C10AA HMG CoA reductase inhibitors [DG:DG01660]	B	p6m	BMI	0.797
C10AA	C10AA1:bmi	-0.0199349	0.0413934	-0.481595	0.980263	0.903852	1.06313	0.6301	0	C10AA HMG CoA reductase inhibitors [DG:DG01660]	B	p6m	BMI	0.797
G03CA	G03CA	14.5283	10.279	1.41339	2.03973e+06	0.00360803	1153123465819260	0.1576	0	G03CA Natural and semisynthetic estrogens, plain	B	p6m	BMI	0.397
G03CA	bmi	0.0336281	0.0212134	1.58523	1.0342	0.992069	1.07812	0.113	0	G03CA Natural and semisynthetic estrogens, plain	B	p6m	BMI	0.384
G03CA	G03CA1:bmi	-0.651593	0.492881	-1.32201	0.521215	0.198309	1.3699	0.1862	0	G03CA Natural and semisynthetic estrogens, plain	B	p6m	BMI	0.434
G04CB	G04CB1:bmi	-0.361379	0.229704	-1.57324	0.696715	0.444088	1.09305	0.1157	0	G04CB Testosterone-5-alpha reductase inhibitors	B	p6m	BMI	0.384
G04CB	G04CB	9.26824	6.11838	1.51482	10596.1	0.0653925	1.71697e+09	0.1299	0	G04CB Testosterone-5-alpha reductase inhibitors	B	p6m	BMI	0.384
G04CB	bmi	0.0353279	0.0212437	1.66298	1.03596	0.993698	1.08002	0.0964	0	G04CB Testosterone-5-alpha reductase inhibitors	B	p6m	BMI	0.384
H03AA	H03AA1:bmi	0.0777766	0.0607108	1.2811	1.08088	0.959587	1.21751	0.2002	0	H03AA Thyroid hormones	B	p6m	BMI	0.443
H03AA	H03AA	-1.75491	1.86157	-0.942703	0.172923	0.0044955	6.6516	0.3459	0	H03AA Thyroid hormones	B	p6m	BMI	0.605
H03AA	bmi	0.0226689	0.0226154	1.00236	1.02293	0.978563	1.0693	0.3162	0	H03AA Thyroid hormones	B	p6m	BMI	0.581
R03BA	R03BA	-3.26843	5.16625	-0.632651	0.0380662	1.51926e-06	953.776	0.527	0	R03BA Glucocorticoids	B	p6m	BMI	0.797
R03BA	bmi	0.0299518	0.0213371	1.40374	1.0304	0.988189	1.07442	0.1605	0	R03BA Glucocorticoids	B	p6m	BMI	0.397
R03BA	R03BA1:bmi	0.0694474	0.161219	0.430764	1.07192	0.781425	1.4704	0.6667	0	R03BA Glucocorticoids	B	p6m	BMI	0.797
A02BC	A02BC	1.37137	0.384177	3.56964	3.94076	1.85595	8.36746	0.0003575	-1	A02BC Proton pump inhibitors [DG:DG01646]	C	p6m	BMI	0.00178
A02BC	A02BC1:bmi	-0.0378987	0.0131845	-2.87448	0.96281	0.938249	0.988015	0.004047	1	A02BC Proton pump inhibitors [DG:DG01646]	C	p6m	BMI	0.0106
A02BC	bmi	0.029693	0.00683407	4.34484	1.03014	1.01643	1.04403	1.394e-05	-1	A02BC Proton pump inhibitors [DG:DG01646]	C	p6m	BMI	0.000585
A03AA	bmi	0.0216119	0.00608306	3.55279	1.02185	1.00974	1.0341	0.0003812	-1	A03AA Synthetic anticholinergics, esters with tertiary amino group	C	p6m	BMI	0.00178
A03AA	A03AA1:bmi	-0.0409274	0.0604478	-0.67707	0.959899	0.852653	1.08063	0.4984	0	A03AA Synthetic anticholinergics, esters with tertiary amino group	C	p6m	BMI	0.698
A03AA	A03AA	1.49273	1.72249	0.866608	4.44921	0.152086	130.16	0.3862	0	A03AA Synthetic anticholinergics, esters with tertiary amino group	C	p6m	BMI	0.559
A10AE	A10AE	-0.383117	1.47905	-0.259028	0.681733	0.0375523	12.3763	0.7956	0	A10AE Insulins and analogues for injection, long-acting	C	p6m	BMI	0.857
A10AE	bmi	0.0209624	0.00611189	3.42978	1.02118	1.00902	1.03349	0.0006041	-1	A10AE Insulins and analogues for injection, long-acting	C	p6m	BMI	0.00198
A10AE	A10AE1:bmi	0.0160737	0.0441027	0.364461	1.0162	0.932052	1.10795	0.7155	0	A10AE Insulins and analogues for injection, long-acting	C	p6m	BMI	0.822
A10BA	A10BA1:bmi	-0.0416406	0.0220068	-1.89217	0.959214	0.91872	1.00149	0.05847	0	A10BA Biguanides [DG:DG01684]	C	p6m	BMI	0.136
A10BA	bmi	0.0249494	0.00630366	3.95793	1.02526	1.01267	1.03801	7.562e-05	-1	A10BA Biguanides [DG:DG01684]	C	p6m	BMI	0.000738
A10BA	A10BA	1.24582	0.702812	1.77262	3.47578	0.87663	13.7813	0.07629	0	A10BA Biguanides [DG:DG01684]	C	p6m	BMI	0.159
B01AC	B01AC	1.08044	0.55619	1.94257	2.94597	0.990369	8.76315	0.05207	0	B01AC Platelet aggregation inhibitors excl. heparin	C	p6m	BMI	0.129
B01AC	B01AC1:bmi	-0.0342288	0.0189673	-1.80462	0.96635	0.931085	1.00295	0.07113	0	B01AC Platelet aggregation inhibitors excl. heparin	C	p6m	BMI	0.157
B01AC	bmi	0.0246931	0.00629588	3.9221	1.025	1.01243	1.03773	8.78e-05	-1	B01AC Platelet aggregation inhibitors excl. heparin	C	p6m	BMI	0.000738
C07AB	C07AB	0.211431	0.542345	0.389846	1.23544	0.426754	3.57659	0.6967	0	C07AB Beta blocking agents, selective	C	p6m	BMI	0.822
C07AB	bmi	0.0218251	0.00637088	3.42576	1.02207	1.00938	1.03491	0.0006131	-1	C07AB Beta blocking agents, selective	C	p6m	BMI	0.00198
C07AB	C07AB1:bmi	-0.0060295	0.0178278	-0.338209	0.993989	0.959857	1.02933	0.7352	0	C07AB Beta blocking agents, selective	C	p6m	BMI	0.822
C08CA	C08CA1:bmi	-0.0230192	0.0166647	-1.38131	0.977244	0.94584	1.00969	0.1672	0	C08CA Dihydropyridine derivatives [DG:DG01928]	C	p6m	BMI	0.305
C08CA	bmi	0.0244711	0.00644854	3.79483	1.02477	1.0119	1.03781	0.0001478	-1	C08CA Dihydropyridine derivatives [DG:DG01928]	C	p6m	BMI	0.00103
C08CA	C08CA	0.622033	0.495623	1.25505	1.86271	0.70513	4.92064	0.2095	0	C08CA Dihydropyridine derivatives [DG:DG01928]	C	p6m	BMI	0.367
C09AA	bmi	0.0255063	0.00640168	3.98432	1.02583	1.01304	1.03879	6.769e-05	-1	C09AA ACE inhibitors, plain [DG:DG01501]	C	p6m	BMI	0.000738
C09AA	C09AA	0.563625	0.534319	1.05485	1.75703	0.616545	5.00719	0.2915	0	C09AA ACE inhibitors, plain [DG:DG01501]	C	p6m	BMI	0.453
C09AA	C09AA1:bmi	-0.0286173	0.0177789	-1.60962	0.971788	0.938508	1.00625	0.1075	0	C09AA ACE inhibitors, plain [DG:DG01501]	C	p6m	BMI	0.205
C09CA	bmi	0.0217382	0.00628465	3.45894	1.02198	1.00946	1.03464	0.0005424	-1	C09CA Angiotensin II receptor blockers, plain [DG:DG01495]	C	p6m	BMI	0.00198
C09CA	C09CA1:bmi	-0.0032393	0.0210883	-0.153607	0.996766	0.956407	1.03883	0.8779	0	C09CA Angiotensin II receptor blockers, plain [DG:DG01495]	C	p6m	BMI	0.899
C09CA	C09CA	-0.0359932	0.653759	-0.0550557	0.964647	0.267847	3.47416	0.9561	0	C09CA Angiotensin II receptor blockers, plain [DG:DG01495]	C	p6m	BMI	0.956
C10AA	C10AA	0.422997	0.38516	1.09824	1.52653	0.717556	3.24754	0.2721	0	C10AA HMG CoA reductase inhibitors [DG:DG01660]	C	p6m	BMI	0.44
C10AA	C10AA1:bmi	-0.0229288	0.0130689	-1.75446	0.977332	0.952616	1.00269	0.07935	0	C10AA HMG CoA reductase inhibitors [DG:DG01660]	C	p6m	BMI	0.159
C10AA	bmi	0.0279326	0.00681349	4.0996	1.02833	1.01469	1.04215	4.139e-05	-1	C10AA HMG CoA reductase inhibitors [DG:DG01660]	C	p6m	BMI	0.000738
G03CA	G03CA	1.17036	1.02538	1.1414	3.22317	0.431995	24.0484	0.2537	0	G03CA Natural and semisynthetic estrogens, plain	C	p6m	BMI	0.426
G03CA	bmi	0.0224126	0.00612696	3.65802	1.02267	1.01046	1.03502	0.0002542	-1	G03CA Natural and semisynthetic estrogens, plain	C	p6m	BMI	0.00153
G03CA	G03CA1:bmi	-0.0337188	0.0388922	-0.866982	0.966843	0.895882	1.04343	0.386	0	G03CA Natural and semisynthetic estrogens, plain	C	p6m	BMI	0.559
G04CB	bmi	0.0214122	0.00608825	3.51697	1.02164	1.00952	1.03391	0.0004365	-1	G04CB Testosterone-5-alpha reductase inhibitors	C	p6m	BMI	0.00183
G04CB	G04CB1:bmi	-0.0227723	0.0527199	-0.431949	0.977485	0.881525	1.08389	0.6658	0	G04CB Testosterone-5-alpha reductase inhibitors	C	p6m	BMI	0.822
G04CB	G04CB	0.495889	1.51751	0.326777	1.64196	0.0838783	32.1421	0.7438	0	G04CB Testosterone-5-alpha reductase inhibitors	C	p6m	BMI	0.822
H03AA	bmi	0.0212704	0.00626189	3.3968	1.0215	1.00904	1.03411	0.0006819	-1	H03AA Thyroid hormones	C	p6m	BMI	0.00205
H03AA	H03AA1:bmi	0.00341187	0.0214463	0.159089	1.00342	0.962114	1.04649	0.8736	0	H03AA Thyroid hormones	C	p6m	BMI	0.899
H03AA	H03AA	-0.297798	0.645692	-0.461207	0.742451	0.209437	2.63199	0.6447	0	H03AA Thyroid hormones	C	p6m	BMI	0.822
R03BA	R03BA	-0.355406	1.00797	-0.352594	0.700889	0.0971982	5.05406	0.7244	0	R03BA Glucocorticoids	C	p6m	BMI	0.822
R03BA	bmi	0.0206845	0.00614174	3.36786	1.0209	1.00868	1.03326	0.0007576	-1	R03BA Glucocorticoids	C	p6m	BMI	0.00212
R03BA	R03BA1:bmi	0.0182814	0.0330248	0.553567	1.01845	0.954616	1.08655	0.5799	0	R03BA Glucocorticoids	C	p6m	BMI	0.786
A02BC	A02BC	0.903146	1.08935	0.829071	2.46735	0.291726	20.8683	0.4071	0	A02BC Proton pump inhibitors [DG:DG01646]	D	p6m	BMI	0.638
A02BC	A02BC1:bmi	-0.0155447	0.036756	-0.422916	0.984575	0.916141	1.05812	0.6724	0	A02BC Proton pump inhibitors [DG:DG01646]	D	p6m	BMI	0.88
A02BC	bmi	0.0391189	0.0235059	1.66421	1.03989	0.993072	1.08892	0.09607	0	A02BC Proton pump inhibitors [DG:DG01646]	D	p6m	BMI	0.237
A03AA	bmi	0.0343632	0.0192105	1.78877	1.03496	0.996717	1.07467	0.07365	0	A03AA Synthetic anticholinergics, esters with tertiary amino group	D	p6m	BMI	0.23
A03AA	A03AA1:bmi	-0.0601319	123.382	-0.000487365	0.94164	8.92987e-106	9.92945e+104	0.9996	0	A03AA Synthetic anticholinergics, esters with tertiary amino group	D	p6m	BMI	1
A03AA	A03AA	-11.9347	3491.42	-0.00341829	6.55909e-06	0	Inf	0.9973	0	A03AA Synthetic anticholinergics, esters with tertiary amino group	D	p6m	BMI	1
A10AE	bmi	0.0380826	0.0194689	1.95607	1.03882	0.999924	1.07922	0.05046	0	A10AE Insulins and analogues for injection, long-acting	D	p6m	BMI	0.23
A10AE	A10AE1:bmi	-0.0768999	0.0933584	-0.823707	0.925983	0.771145	1.11191	0.4101	0	A10AE Insulins and analogues for injection, long-acting	D	p6m	BMI	0.638
A10AE	A10AE	3.34815	2.85554	1.17251	28.4501	0.105545	7668.81	0.241	0	A10AE Insulins and analogues for injection, long-acting	D	p6m	BMI	0.465
A10BA	bmi	0.0416475	0.0198476	2.09836	1.04253	1.00275	1.08388	0.03587	-1	A10BA Biguanides [DG:DG01684]	D	p6m	BMI	0.23
A10BA	A10BA1:bmi	-0.0746326	0.0698654	-1.06823	0.928084	0.809315	1.06428	0.2854	0	A10BA Biguanides [DG:DG01684]	D	p6m	BMI	0.499
A10BA	A10BA	2.11621	2.18157	0.97004	8.29961	0.115371	597.06	0.332	0	A10BA Biguanides [DG:DG01684]	D	p6m	BMI	0.558
B01AC	B01AC	2.83039	1.40099	2.02028	16.952	1.08817	264.087	0.04335	-1	B01AC Platelet aggregation inhibitors excl. heparin	D	p6m	BMI	0.23
B01AC	B01AC1:bmi	-0.0900903	0.0488315	-1.84492	0.913849	0.830441	1.00563	0.06505	0	B01AC Platelet aggregation inhibitors excl. heparin	D	p6m	BMI	0.23
B01AC	bmi	0.0502025	0.0202939	2.47377	1.05148	1.01048	1.09415	0.01337	-1	B01AC Platelet aggregation inhibitors excl. heparin	D	p6m	BMI	0.23
C07AB	C07AB1:bmi	-0.0644884	0.0443421	-1.45434	0.937547	0.859506	1.02267	0.1459	0	C07AB Beta blocking agents, selective	D	p6m	BMI	0.306
C07AB	C07AB	2.31559	1.3072	1.77141	10.1309	0.781548	131.322	0.07649	0	C07AB Beta blocking agents, selective	D	p6m	BMI	0.23
C07AB	bmi	0.0473342	0.0210305	2.25074	1.04847	1.00613	1.09259	0.0244	-1	C07AB Beta blocking agents, selective	D	p6m	BMI	0.23
C08CA	bmi	0.0320995	0.0211818	1.51543	1.03262	0.990628	1.07639	0.1297	0	C08CA Dihydropyridine derivatives [DG:DG01928]	D	p6m	BMI	0.287
C08CA	C08CA	-0.473644	1.33429	-0.354978	0.622729	0.0455559	8.51243	0.7226	0	C08CA Dihydropyridine derivatives [DG:DG01928]	D	p6m	BMI	0.88
C08CA	C08CA1:bmi	0.0121518	0.0440735	0.275717	1.01223	0.928457	1.10355	0.7828	0	C08CA Dihydropyridine derivatives [DG:DG01928]	D	p6m	BMI	0.889
C09AA	bmi	0.0353002	0.0209715	1.68325	1.03593	0.994214	1.0794	0.09233	0	C09AA ACE inhibitors, plain [DG:DG01501]	D	p6m	BMI	0.237
C09AA	C09AA1:bmi	-3.2181e-05	0.0470034	-0.000684651	0.999968	0.911961	1.09647	0.9995	0	C09AA ACE inhibitors, plain [DG:DG01501]	D	p6m	BMI	1
C09AA	C09AA	-0.34078	1.43372	-0.237689	0.711215	0.0428165	11.8138	0.8121	0	C09AA ACE inhibitors, plain [DG:DG01501]	D	p6m	BMI	0.898
C09CA	C09CA	0.849861	1.72163	0.493638	2.33932	0.0801002	68.3197	0.6216	0	C09CA Angiotensin II receptor blockers, plain [DG:DG01495]	D	p6m	BMI	0.842
C09CA	C09CA1:bmi	-0.0281789	0.0567097	-0.496898	0.972214	0.869942	1.08651	0.6193	0	C09CA Angiotensin II receptor blockers, plain [DG:DG01495]	D	p6m	BMI	0.842
C09CA	bmi	0.0378662	0.0202103	1.87361	1.03859	0.998256	1.08056	0.06098	0	C09CA Angiotensin II receptor blockers, plain [DG:DG01495]	D	p6m	BMI	0.23
C10AA	C10AA1:bmi	-0.0267095	0.0362855	-0.736092	0.973644	0.906805	1.04541	0.4617	0	C10AA HMG CoA reductase inhibitors [DG:DG01660]	D	p6m	BMI	0.693
C10AA	C10AA	0.660649	1.07325	0.615562	1.93605	0.236246	15.866	0.5382	0	C10AA HMG CoA reductase inhibitors [DG:DG01660]	D	p6m	BMI	0.779
C10AA	bmi	0.0452435	0.0234574	1.92875	1.04628	0.999268	1.09551	0.05376	0	C10AA HMG CoA reductase inhibitors [DG:DG01660]	D	p6m	BMI	0.23
G03CA	G03CA	14.0466	7.3629	1.90776	1.25999e+06	0.680827	2.33182e+12	0.05642	0	G03CA Natural and semisynthetic estrogens, plain	D	p6m	BMI	0.23
G03CA	bmi	0.0369703	0.0192003	1.92551	1.03766	0.999339	1.07746	0.05417	0	G03CA Natural and semisynthetic estrogens, plain	D	p6m	BMI	0.23
G03CA	G03CA1:bmi	-0.614137	0.353428	-1.73765	0.541108	0.270673	1.08174	0.08227	0	G03CA Natural and semisynthetic estrogens, plain	D	p6m	BMI	0.23
G04CB	bmi	0.0368586	0.0192249	1.91724	1.03755	0.999179	1.07739	0.05521	0	G04CB Testosterone-5-alpha reductase inhibitors	D	p6m	BMI	0.23
G04CB	G04CB1:bmi	-0.205843	0.17653	-1.16605	0.813961	0.575891	1.15045	0.2436	0	G04CB Testosterone-5-alpha reductase inhibitors	D	p6m	BMI	0.465
G04CB	G04CB	5.05395	4.66511	1.08335	156.64	0.0167472	1.46509e+06	0.2787	0	G04CB Testosterone-5-alpha reductase inhibitors	D	p6m	BMI	0.499
H03AA	bmi	0.0318264	0.0205045	1.55217	1.03234	0.991673	1.07467	0.1206	0	H03AA Thyroid hormones	D	p6m	BMI	0.281
H03AA	H03AA1:bmi	0.0157905	0.0503836	0.313406	1.01592	0.920388	1.12136	0.754	0	H03AA Thyroid hormones	D	p6m	BMI	0.88
H03AA	H03AA	-0.0856122	1.55209	-0.0551592	0.91795	0.0438197	19.2295	0.956	0	H03AA Thyroid hormones	D	p6m	BMI	1
R03BA	R03BA	-1.80797	4.62813	-0.390649	0.163986	1.88505e-05	1426.57	0.6961	0	R03BA Glucocorticoids	D	p6m	BMI	0.88
R03BA	bmi	0.0340127	0.0193292	1.75965	1.0346	0.996135	1.07455	0.07847	0	R03BA Glucocorticoids	D	p6m	BMI	0.23
R03BA	R03BA1:bmi	0.0457378	0.143149	0.319511	1.0468	0.790705	1.38584	0.7493	0	R03BA Glucocorticoids	D	p6m	BMI	0.88
A02BC	A02BC	0.774795	0.218666	3.54327	2.17015	1.41371	3.33134	0.0003952	-1	A02BC Proton pump inhibitors [DG:DG01646]	E	p6m	BMI	0.00111
A02BC	A02BC1:bmi	-0.0138625	0.00753801	-1.83902	0.986233	0.971769	1.00091	0.06591	0	A02BC Proton pump inhibitors [DG:DG01646]	E	p6m	BMI	0.138
A02BC	bmi	0.0180208	0.00376902	4.7813	1.01818	1.01069	1.02573	1.742e-06	-1	A02BC Proton pump inhibitors [DG:DG01646]	E	p6m	BMI	5.23e-06
A03AA	bmi	0.0162037	0.0033592	4.82367	1.01634	1.00967	1.02305	1.41e-06	-1	A03AA Synthetic anticholinergics, esters with tertiary amino group	E	p6m	BMI	4.56e-06
A03AA	A03AA1:bmi	0.0625188	0.0293936	2.12695	1.06451	1.00492	1.12764	0.03342	-1	A03AA Synthetic anticholinergics, esters with tertiary amino group	E	p6m	BMI	0.0794
A03AA	A03AA	-1.6075	0.92612	-1.73574	0.200388	0.0326253	1.2308	0.08261	0	A03AA Synthetic anticholinergics, esters with tertiary amino group	E	p6m	BMI	0.152
A10AE	A10AE	-1.5383	1.17243	-1.31206	0.214746	0.0215749	2.13747	0.1895	0	A10AE Insulins and analogues for injection, long-acting	E	p6m	BMI	0.284
A10AE	bmi	0.0164145	0.0033569	4.88979	1.01655	1.00988	1.02326	1.01e-06	-1	A10AE Insulins and analogues for injection, long-acting	E	p6m	BMI	4.19e-06
A10AE	A10AE1:bmi	0.0403633	0.0345387	1.16864	1.04119	0.973039	1.11411	0.2425	0	A10AE Insulins and analogues for injection, long-acting	E	p6m	BMI	0.339
A10BA	A10BA1:bmi	-0.0178284	0.0129589	-1.37577	0.98233	0.957693	1.0076	0.1689	0	A10BA Biguanides [DG:DG01684]	E	p6m	BMI	0.273
A10BA	bmi	0.0175316	0.00347451	5.04579	1.01769	1.01078	1.02464	4.518e-07	-1	A10BA Biguanides [DG:DG01684]	E	p6m	BMI	2.71e-06
A10BA	A10BA	0.693966	0.421929	1.64475	2.00164	0.875463	4.5765	0.1	0	A10BA Biguanides [DG:DG01684]	E	p6m	BMI	0.175
B01AC	B01AC	0.698953	0.343535	2.03459	2.01165	1.02597	3.9443	0.04189	-1	B01AC Platelet aggregation inhibitors excl. heparin	E	p6m	BMI	0.0926
B01AC	B01AC1:bmi	-0.0156077	0.0117323	-1.33032	0.984513	0.962133	1.00741	0.1834	0	B01AC Platelet aggregation inhibitors excl. heparin	E	p6m	BMI	0.284
B01AC	bmi	0.017994	0.00345352	5.21033	1.01816	1.01129	1.02507	1.886e-07	-1	B01AC Platelet aggregation inhibitors excl. heparin	E	p6m	BMI	2.44e-06
C07AB	C07AB	0.177948	0.343541	0.517982	1.19476	0.609338	2.34264	0.6045	0	C07AB Beta blocking agents, selective	E	p6m	BMI	0.667
C07AB	bmi	0.0167696	0.00347083	4.83158	1.01691	1.01002	1.02385	1.355e-06	-1	C07AB Beta blocking agents, selective	E	p6m	BMI	4.56e-06
C07AB	C07AB1:bmi	-0.00205602	0.0114143	-0.180127	0.997946	0.975868	1.02052	0.8571	0	C07AB Beta blocking agents, selective	E	p6m	BMI	0.857
C08CA	C08CA1:bmi	-0.00677857	0.00952702	-0.71151	0.993244	0.97487	1.01197	0.4768	0	C08CA Dihydropyridine derivatives [DG:DG01928]	E	p6m	BMI	0.556
C08CA	bmi	0.0173802	0.00355347	4.89106	1.01753	1.01047	1.02464	1.003e-06	-1	C08CA Dihydropyridine derivatives [DG:DG01928]	E	p6m	BMI	4.19e-06
C08CA	C08CA	0.31306	0.283593	1.10391	1.3676	0.784449	2.38427	0.2696	0	C08CA Dihydropyridine derivatives [DG:DG01928]	E	p6m	BMI	0.365
C09AA	bmi	0.0190129	0.00354081	5.36965	1.01919	1.01215	1.02629	7.893e-08	-1	C09AA ACE inhibitors, plain [DG:DG01501]	E	p6m	BMI	2.44e-06
C09AA	C09AA	0.515349	0.29743	1.73267	1.67422	0.93463	2.99907	0.08315	0	C09AA ACE inhibitors, plain [DG:DG01501]	E	p6m	BMI	0.152
C09AA	C09AA1:bmi	-0.0180483	0.00993301	-1.817	0.982114	0.963178	1.00142	0.06922	0	C09AA ACE inhibitors, plain [DG:DG01501]	E	p6m	BMI	0.138
C09CA	bmi	0.0177028	0.00345112	5.12957	1.01786	1.011	1.02477	2.905e-07	-1	C09CA Angiotensin II receptor blockers, plain [DG:DG01495]	E	p6m	BMI	2.44e-06
C09CA	C09CA1:bmi	-0.015735	0.0127188	-1.23714	0.984388	0.960152	1.00924	0.216	0	C09CA Angiotensin II receptor blockers, plain [DG:DG01495]	E	p6m	BMI	0.313
C09CA	C09CA	0.538715	0.386142	1.39512	1.7138	0.804036	3.65298	0.163	0	C09CA Angiotensin II receptor blockers, plain [DG:DG01495]	E	p6m	BMI	0.273
C10AA	C10AA	0.584871	0.217169	2.69315	1.79476	1.1726	2.74702	0.007078	-1	C10AA HMG CoA reductase inhibitors [DG:DG01660]	E	p6m	BMI	0.0186
C10AA	C10AA1:bmi	-0.0158157	0.00746168	-2.11959	0.984309	0.970018	0.99881	0.03404	1	C10AA HMG CoA reductase inhibitors [DG:DG01660]	E	p6m	BMI	0.0794
C10AA	bmi	0.0199562	0.0037725	5.28992	1.02016	1.01264	1.02773	1.224e-07	-1	C10AA HMG CoA reductase inhibitors [DG:DG01660]	E	p6m	BMI	2.44e-06
G03CA	G03CA	0.511079	0.521333	0.980331	1.66709	0.600064	4.63148	0.3269	0	G03CA Natural and semisynthetic estrogens, plain	E	p6m	BMI	0.425
G03CA	bmi	0.0174141	0.00338635	5.14243	1.01757	1.01084	1.02434	2.713e-07	-1	G03CA Natural and semisynthetic estrogens, plain	E	p6m	BMI	2.44e-06
G03CA	G03CA1:bmi	-0.0118895	0.019813	-0.600083	0.988181	0.950542	1.02731	0.5485	0	G03CA Natural and semisynthetic estrogens, plain	E	p6m	BMI	0.623
G04CB	bmi	0.0166356	0.00335482	4.95871	1.01677	1.01011	1.02348	7.099e-07	-1	G04CB Testosterone-5-alpha reductase inhibitors	E	p6m	BMI	3.73e-06
G04CB	G04CB1:bmi	0.0147626	0.0335874	0.439526	1.01487	0.950214	1.08393	0.6603	0	G04CB Testosterone-5-alpha reductase inhibitors	E	p6m	BMI	0.693
G04CB	G04CB	-0.485156	0.976589	-0.496786	0.615601	0.0907869	4.17423	0.6193	0	G04CB Testosterone-5-alpha reductase inhibitors	E	p6m	BMI	0.667
H03AA	bmi	0.017565	0.00345777	5.07986	1.01772	1.01085	1.02464	3.779e-07	-1	H03AA Thyroid hormones	E	p6m	BMI	2.65e-06
H03AA	H03AA1:bmi	-0.011115	0.0120041	-0.925939	0.988947	0.965951	1.01249	0.3545	0	H03AA Thyroid hormones	E	p6m	BMI	0.438
H03AA	H03AA	0.336256	0.347751	0.966944	1.3997	0.70799	2.76721	0.3336	0	H03AA Thyroid hormones	E	p6m	BMI	0.425
R03BA	R03BA	0.373215	0.514171	0.725858	1.4524	0.530176	3.97878	0.4679	0	R03BA Glucocorticoids	E	p6m	BMI	0.556
R03BA	bmi	0.0165356	0.00339317	4.87321	1.01667	1.00993	1.02346	1.098e-06	-1	R03BA Glucocorticoids	E	p6m	BMI	4.19e-06
R03BA	R03BA1:bmi	0.00484764	0.0175086	0.276872	1.00486	0.970961	1.03994	0.7819	0	R03BA Glucocorticoids	E	p6m	BMI	0.801
A02BC	A02BC	-0.176618	0.233345	-0.756895	0.8381	0.530475	1.32412	0.4491	0	A02BC Proton pump inhibitors [DG:DG01646]	F	p6m	BMI	0.723
A02BC	A02BC1:bmi	-0.00501956	0.00807039	-0.621972	0.994993	0.979378	1.01086	0.534	0	A02BC Proton pump inhibitors [DG:DG01646]	F	p6m	BMI	0.773
A02BC	bmi	0.0206134	0.00426	4.83882	1.02083	1.01234	1.02939	1.312e-06	-1	A02BC Proton pump inhibitors [DG:DG01646]	F	p6m	BMI	2.64e-05
A03AA	bmi	0.0166067	0.00375068	4.42765	1.01675	1.0093	1.02425	9.559e-06	-1	A03AA Synthetic anticholinergics, esters with tertiary amino group	F	p6m	BMI	3.14e-05
A03AA	A03AA1:bmi	0.0660122	0.0329132	2.00564	1.06824	1.0015	1.13942	0.0449	-1	A03AA Synthetic anticholinergics, esters with tertiary amino group	F	p6m	BMI	0.111
A03AA	A03AA	-2.33675	1.00602	-2.32276	0.096641	0.0134524	0.694261	0.0202	1	A03AA Synthetic anticholinergics, esters with tertiary amino group	F	p6m	BMI	0.0566
A10AE	A10AE	-2.78319	1.31251	-2.12051	0.0618408	0.00472088	0.81008	0.03397	1	A10AE Insulins and analogues for injection, long-acting	F	p6m	BMI	0.0892
A10AE	bmi	0.0165853	0.00374907	4.42385	1.01672	1.00928	1.02422	9.729e-06	-1	A10AE Insulins and analogues for injection, long-acting	F	p6m	BMI	3.14e-05
A10AE	A10AE1:bmi	0.0674116	0.0391994	1.71971	1.06974	0.990623	1.15517	0.0855	0	A10AE Insulins and analogues for injection, long-acting	F	p6m	BMI	0.2
A10BA	A10BA	0.462201	0.464068	0.995977	1.58756	0.639294	3.94241	0.3193	0	A10BA Biguanides [DG:DG01684]	F	p6m	BMI	0.614
A10BA	A10BA1:bmi	-0.0131482	0.0142966	-0.91967	0.986938	0.959666	1.01498	0.3578	0	A10BA Biguanides [DG:DG01684]	F	p6m	BMI	0.653
A10BA	bmi	0.0180663	0.00387691	4.65998	1.01823	1.01052	1.026	3.176e-06	-1	A10BA Biguanides [DG:DG01684]	F	p6m	BMI	2.64e-05
B01AC	B01AC	0.0314199	0.368693	0.0852196	1.03192	0.500958	2.12564	0.9321	0	B01AC Platelet aggregation inhibitors excl. heparin	F	p6m	BMI	0.995
B01AC	B01AC1:bmi	-0.00560725	0.0126337	-0.443833	0.994408	0.970087	1.01934	0.6572	0	B01AC Platelet aggregation inhibitors excl. heparin	F	p6m	BMI	0.826
B01AC	bmi	0.0177354	0.00386732	4.58596	1.01789	1.01021	1.02564	4.537e-06	-1	B01AC Platelet aggregation inhibitors excl. heparin	F	p6m	BMI	2.64e-05
C07AB	C07AB1:bmi	0.00564349	0.0123911	0.455448	1.00566	0.981529	1.03038	0.6488	0	C07AB Beta blocking agents, selective	F	p6m	BMI	0.826
C07AB	C07AB	-0.41165	0.37087	-1.10996	0.662556	0.320276	1.37063	0.267	0	C07AB Beta blocking agents, selective	F	p6m	BMI	0.59
C07AB	bmi	0.0173227	0.00388539	4.45843	1.01747	1.00975	1.02525	8.285e-06	-1	C07AB Beta blocking agents, selective	F	p6m	BMI	3.14e-05
C08CA	C08CA	-0.107533	0.305139	-0.352407	0.898047	0.493803	1.63322	0.7245	0	C08CA Dihydropyridine derivatives [DG:DG01928]	F	p6m	BMI	0.845
C08CA	C08CA1:bmi	0.000716442	0.0102984	0.0695682	1.00072	0.980719	1.02112	0.9445	0	C08CA Dihydropyridine derivatives [DG:DG01928]	F	p6m	BMI	0.995
C08CA	bmi	0.0174146	0.0039879	4.36686	1.01757	1.00964	1.02555	1.265e-05	-1	C08CA Dihydropyridine derivatives [DG:DG01928]	F	p6m	BMI	3.8e-05
C09AA	C09AA	-0.00206626	0.318989	-0.00647754	0.997936	0.534033	1.86482	0.9948	0	C09AA ACE inhibitors, plain [DG:DG01501]	F	p6m	BMI	0.995
C09AA	bmi	0.018427	0.0039702	4.64132	1.0186	1.0107	1.02656	3.476e-06	-1	C09AA ACE inhibitors, plain [DG:DG01501]	F	p6m	BMI	2.64e-05
C09AA	C09AA1:bmi	-0.00522961	0.010694	-0.489025	0.994784	0.97415	1.01586	0.6248	0	C09AA ACE inhibitors, plain [DG:DG01501]	F	p6m	BMI	0.826
C09CA	bmi	0.0181201	0.00385993	4.69441	1.01829	1.01061	1.02602	2.685e-06	-1	C09CA Angiotensin II receptor blockers, plain [DG:DG01495]	F	p6m	BMI	2.64e-05
C09CA	C09CA1:bmi	-0.0056174	0.0137833	-0.407551	0.994398	0.967894	1.02163	0.6836	0	C09CA Angiotensin II receptor blockers, plain [DG:DG01495]	F	p6m	BMI	0.826
C09CA	C09CA	-0.00530475	0.417229	-0.0127143	0.994709	0.439073	2.25349	0.9899	0	C09CA Angiotensin II receptor blockers, plain [DG:DG01495]	F	p6m	BMI	0.995
C10AA	C10AA1:bmi	-0.00813121	0.00820418	-0.991105	0.991902	0.976079	1.00798	0.3216	0	C10AA HMG CoA reductase inhibitors [DG:DG01660]	F	p6m	BMI	0.614
C10AA	C10AA	0.172338	0.237875	0.724489	1.18808	0.745345	1.8938	0.4688	0	C10AA HMG CoA reductase inhibitors [DG:DG01660]	F	p6m	BMI	0.723
C10AA	bmi	0.0195601	0.00423261	4.62128	1.01975	1.01133	1.02825	3.829e-06	-1	C10AA HMG CoA reductase inhibitors [DG:DG01660]	F	p6m	BMI	2.64e-05
G03CA	G03CA	-0.0646622	0.572187	-0.113009	0.937384	0.305388	2.87729	0.91	0	G03CA Natural and semisynthetic estrogens, plain	F	p6m	BMI	0.995
G03CA	bmi	0.0167464	0.0037825	4.42734	1.01689	1.00938	1.02445	9.573e-06	-1	G03CA Natural and semisynthetic estrogens, plain	F	p6m	BMI	3.14e-05
G03CA	G03CA1:bmi	-0.0153077	0.0217552	-0.703637	0.984809	0.943698	1.02771	0.4817	0	G03CA Natural and semisynthetic estrogens, plain	F	p6m	BMI	0.723
G04CB	bmi	0.0171356	0.00374612	4.57422	1.01728	1.00984	1.02478	4.798e-06	-1	G04CB Testosterone-5-alpha reductase inhibitors	F	p6m	BMI	2.64e-05
G04CB	G04CB1:bmi	0.0137426	0.0342799	0.400895	1.01384	0.947956	1.0843	0.6885	0	G04CB Testosterone-5-alpha reductase inhibitors	F	p6m	BMI	0.826
G04CB	G04CB	-0.854361	0.995572	-0.858162	0.425555	0.060463	2.99517	0.3908	0	G04CB Testosterone-5-alpha reductase inhibitors	F	p6m	BMI	0.657
H03AA	H03AA	-0.209728	0.370946	-0.565387	0.810805	0.391881	1.67756	0.5718	0	H03AA Thyroid hormones	F	p6m	BMI	0.801
H03AA	bmi	0.0176704	0.00387155	4.56417	1.01783	1.01013	1.02558	5.034e-06	-1	H03AA Thyroid hormones	F	p6m	BMI	2.64e-05
H03AA	H03AA1:bmi	-0.000370679	0.0128325	-0.028886	0.999629	0.9748	1.02509	0.977	0	H03AA Thyroid hormones	F	p6m	BMI	0.995
R03BA	R03BA	-0.588288	0.568416	-1.03496	0.555277	0.182244	1.69186	0.3007	0	R03BA Glucocorticoids	F	p6m	BMI	0.614
R03BA	bmi	0.016772	0.00378733	4.42845	1.01691	1.00939	1.02449	9.524e-06	-1	R03BA Glucocorticoids	F	p6m	BMI	3.14e-05
R03BA	R03BA1:bmi	0.0169451	0.0195161	0.868265	1.01709	0.978918	1.05675	0.3853	0	R03BA Glucocorticoids	F	p6m	BMI	0.657
A02BC	A02BC	0.413947	0.390459	1.06016	1.51278	0.703723	3.25198	0.2891	0	A02BC Proton pump inhibitors [DG:DG01646]	G	p6m	BMI	0.528
A02BC	A02BC1:bmi	-0.0266671	0.0134151	-1.98785	0.973685	0.948417	0.999627	0.04684	1	A02BC Proton pump inhibitors [DG:DG01646]	G	p6m	BMI	0.131
A02BC	bmi	0.0314767	0.0071472	4.40406	1.03198	1.01762	1.04654	1.066e-05	-1	A02BC Proton pump inhibitors [DG:DG01646]	G	p6m	BMI	0.000448
A03AA	bmi	0.023034	0.00632673	3.64075	1.0233	1.01069	1.03607	0.0002723	-1	A03AA Synthetic anticholinergics, esters with tertiary amino group	G	p6m	BMI	0.00144
A03AA	A03AA1:bmi	-0.0279288	0.0605625	-0.461156	0.972458	0.86361	1.09502	0.6447	0	A03AA Synthetic anticholinergics, esters with tertiary amino group	G	p6m	BMI	0.778
A03AA	A03AA	0.543748	1.72457	0.315294	1.72245	0.0586305	50.6022	0.7525	0	A03AA Synthetic anticholinergics, esters with tertiary amino group	G	p6m	BMI	0.854
A10AE	A10AE	-1.53556	1.57937	-0.97226	0.215336	0.00974309	4.75921	0.3309	0	A10AE Insulins and analogues for injection, long-acting	G	p6m	BMI	0.579
A10AE	bmi	0.0220956	0.00635969	3.47432	1.02234	1.00968	1.03517	0.0005129	-1	A10AE Insulins and analogues for injection, long-acting	G	p6m	BMI	0.0018
A10AE	A10AE1:bmi	0.040369	0.0474187	0.851332	1.04119	0.948784	1.14261	0.3946	0	A10AE Insulins and analogues for injection, long-acting	G	p6m	BMI	0.609
A10BA	A10BA	1.05586	0.733761	1.43896	2.87443	0.682255	12.1104	0.1502	0	A10BA Biguanides [DG:DG01684]	G	p6m	BMI	0.371
A10BA	A10BA1:bmi	-0.0379795	0.0229878	-1.65216	0.962733	0.920317	1.0071	0.09851	0	A10BA Biguanides [DG:DG01684]	G	p6m	BMI	0.259
A10BA	bmi	0.0264199	0.00654692	4.03547	1.02677	1.01368	1.04003	5.464e-05	-1	A10BA Biguanides [DG:DG01684]	G	p6m	BMI	0.00084
B01AC	B01AC	0.432626	0.571965	0.756387	1.5413	0.502353	4.72896	0.4494	0	B01AC Platelet aggregation inhibitors excl. heparin	G	p6m	BMI	0.639
B01AC	B01AC1:bmi	-0.0229353	0.0195418	-1.17365	0.977326	0.940599	1.01549	0.2405	0	B01AC Platelet aggregation inhibitors excl. heparin	G	p6m	BMI	0.481
B01AC	bmi	0.0248514	0.00656104	3.78772	1.02516	1.01206	1.03843	0.0001524	-1	B01AC Platelet aggregation inhibitors excl. heparin	G	p6m	BMI	0.00128
C07AB	C07AB1:bmi	-0.000255179	0.0184659	-0.0138189	0.999745	0.964207	1.03659	0.989	0	C07AB Beta blocking agents, selective	G	p6m	BMI	0.989
C07AB	C07AB	-0.264255	0.559155	-0.472597	0.767778	0.256603	2.29726	0.6365	0	C07AB Beta blocking agents, selective	G	p6m	BMI	0.778
C07AB	bmi	0.0234544	0.00663345	3.53577	1.02373	1.01051	1.03713	0.0004072	-1	C07AB Beta blocking agents, selective	G	p6m	BMI	0.00157
C08CA	C08CA	0.185422	0.505467	0.366833	1.20373	0.446946	3.24191	0.7137	0	C08CA Dihydropyridine derivatives [DG:DG01928]	G	p6m	BMI	0.833
C08CA	C08CA1:bmi	-0.0141523	0.0170204	-0.83149	0.985947	0.953598	1.01939	0.4057	0	C08CA Dihydropyridine derivatives [DG:DG01928]	G	p6m	BMI	0.609
C08CA	bmi	0.025081	0.00672943	3.72706	1.0254	1.01196	1.03901	0.0001941	-1	C08CA Dihydropyridine derivatives [DG:DG01928]	G	p6m	BMI	0.00136
C09AA	C09AA	0.0954146	0.539363	0.176902	1.10011	0.382219	3.16639	0.8596	0	C09AA ACE inhibitors, plain [DG:DG01501]	G	p6m	BMI	0.91
C09AA	bmi	0.0257707	0.00669389	3.84988	1.02611	1.01273	1.03966	0.0001184	-1	C09AA ACE inhibitors, plain [DG:DG01501]	G	p6m	BMI	0.00124
C09AA	C09AA1:bmi	-0.01625	0.0179724	-0.904165	0.983881	0.949826	1.01916	0.3659	0	C09AA ACE inhibitors, plain [DG:DG01501]	G	p6m	BMI	0.591
C09CA	bmi	0.0231305	0.00654639	3.53332	1.0234	1.01035	1.03662	0.000411	-1	C09CA Angiotensin II receptor blockers, plain [DG:DG01495]	G	p6m	BMI	0.00157
C09CA	C09CA1:bmi	0.0055725	0.0216824	0.257005	1.00559	0.963747	1.04925	0.7972	0	C09CA Angiotensin II receptor blockers, plain [DG:DG01495]	G	p6m	BMI	0.881
C09CA	C09CA	-0.499502	0.670623	-0.744833	0.606833	0.163008	2.25906	0.4564	0	C09CA Angiotensin II receptor blockers, plain [DG:DG01495]	G	p6m	BMI	0.639
C10AA	C10AA1:bmi	-0.0168709	0.0135429	-1.24574	0.983271	0.957513	1.00972	0.2129	0	C10AA HMG CoA reductase inhibitors [DG:DG01660]	G	p6m	BMI	0.471
C10AA	C10AA	0.0667201	0.398202	0.167553	1.069	0.489791	2.33314	0.8669	0	C10AA HMG CoA reductase inhibitors [DG:DG01660]	G	p6m	BMI	0.91
C10AA	bmi	0.0285387	0.00711067	4.0135	1.02895	1.01471	1.04339	5.998e-05	-1	C10AA HMG CoA reductase inhibitors [DG:DG01660]	G	p6m	BMI	0.00084
G03CA	G03CA	0.631976	1.06586	0.592923	1.88132	0.232894	15.1974	0.5532	0	G03CA Natural and semisynthetic estrogens, plain	G	p6m	BMI	0.726
G03CA	bmi	0.0229851	0.00637298	3.60665	1.02325	1.01055	1.03611	0.0003107	-1	G03CA Natural and semisynthetic estrogens, plain	G	p6m	BMI	0.00145
G03CA	G03CA1:bmi	-0.0377061	0.0404487	-0.932197	0.962996	0.889596	1.04245	0.3512	0	G03CA Natural and semisynthetic estrogens, plain	G	p6m	BMI	0.59
G04CB	bmi	0.0230573	0.00633674	3.63867	1.02333	1.01069	1.03611	0.0002745	-1	G04CB Testosterone-5-alpha reductase inhibitors	G	p6m	BMI	0.00144
G04CB	G04CB1:bmi	-0.0234218	0.0513147	-0.456436	0.97685	0.883379	1.08021	0.6481	0	G04CB Testosterone-5-alpha reductase inhibitors	G	p6m	BMI	0.778
G04CB	G04CB	0.152844	1.47765	0.103438	1.16514	0.0643501	21.0965	0.9176	0	G04CB Testosterone-5-alpha reductase inhibitors	G	p6m	BMI	0.94
H03AA	H03AA	-0.804694	0.666076	-1.20811	0.447225	0.12121	1.65012	0.227	0	H03AA Thyroid hormones	G	p6m	BMI	0.477
H03AA	bmi	0.0224009	0.00651533	3.43817	1.02265	1.00968	1.0358	0.0005865	-1	H03AA Thyroid hormones	G	p6m	BMI	0.00189
H03AA	H03AA1:bmi	0.0135426	0.0221825	0.610506	1.01363	0.970507	1.05868	0.5415	0	H03AA Thyroid hormones	G	p6m	BMI	0.726
R03BA	R03BA	-1.46349	1.06242	-1.37751	0.231426	0.0288431	1.85688	0.1684	0	R03BA Glucocorticoids	G	p6m	BMI	0.393
R03BA	bmi	0.0217957	0.00638344	3.41441	1.02203	1.00933	1.0349	0.0006401	-1	R03BA Glucocorticoids	G	p6m	BMI	0.00192
R03BA	R03BA1:bmi	0.0371306	0.0350184	1.06032	1.03783	0.968984	1.11156	0.289	0	R03BA Glucocorticoids	G	p6m	BMI	0.528
A02BC	A02BC	0.177285	1.08686	0.163117	1.19397	0.141845	10.0502	0.8704	0	A02BC Proton pump inhibitors [DG:DG01646]	H	p6m	BMI	0.937
A02BC	A02BC1:bmi	-0.00796301	0.036683	-0.217077	0.992069	0.923242	1.06603	0.8282	0	A02BC Proton pump inhibitors [DG:DG01646]	H	p6m	BMI	0.915
A02BC	bmi	0.041974	0.0238048	1.76326	1.04287	0.995326	1.09268	0.07787	0	A02BC Proton pump inhibitors [DG:DG01646]	H	p6m	BMI	0.246
A03AA	bmi	0.0384638	0.0194	1.98267	1.03921	1.00044	1.07949	0.04741	-1	A03AA Synthetic anticholinergics, esters with tertiary amino group	H	p6m	BMI	0.221
A03AA	A03AA1:bmi	-0.0591712	132.741	-0.000445763	0.942545	9.53898e-114	9.31328e+112	0.9996	0	A03AA Synthetic anticholinergics, esters with tertiary amino group	H	p6m	BMI	1
A03AA	A03AA	-12.5101	3716.49	-0.00336609	3.68937e-06	0	Inf	0.9973	0	A03AA Synthetic anticholinergics, esters with tertiary amino group	H	p6m	BMI	1
A10AE	A10AE	1.51604	2.87552	0.527221	4.55414	0.0162423	1276.92	0.598	0	A10AE Insulins and analogues for injection, long-acting	H	p6m	BMI	0.861
A10AE	bmi	0.0404455	0.0196587	2.05738	1.04127	1.00192	1.08218	0.03966	-1	A10AE Insulins and analogues for injection, long-acting	H	p6m	BMI	0.22
A10AE	A10AE1:bmi	-0.0280561	0.0934992	-0.300068	0.972334	0.809516	1.1679	0.7641	0	A10AE Insulins and analogues for injection, long-acting	H	p6m	BMI	0.891
A10BA	A10BA1:bmi	-0.0636915	0.0695015	-0.916404	0.938294	0.818798	1.07523	0.3595	0	A10BA Biguanides [DG:DG01684]	H	p6m	BMI	0.656
A10BA	A10BA	1.68402	2.17385	0.774671	5.38714	0.0760143	381.787	0.4385	0	A10BA Biguanides [DG:DG01684]	H	p6m	BMI	0.767
A10BA	bmi	0.0452933	0.020093	2.25418	1.04633	1.00593	1.08837	0.02419	-1	A10BA Biguanides [DG:DG01684]	H	p6m	BMI	0.22
B01AC	B01AC	2.23138	1.41279	1.57942	9.31269	0.584056	148.489	0.1143	0	B01AC Platelet aggregation inhibitors excl. heparin	H	p6m	BMI	0.263
B01AC	B01AC1:bmi	-0.0768389	0.0492649	-1.55971	0.926039	0.840801	1.01992	0.1188	0	B01AC Platelet aggregation inhibitors excl. heparin	H	p6m	BMI	0.263
B01AC	bmi	0.0516748	0.0206036	2.50805	1.05303	1.01135	1.09643	0.01215	-1	B01AC Platelet aggregation inhibitors excl. heparin	H	p6m	BMI	0.22
C07AB	C07AB1:bmi	-0.0678962	0.0450324	-1.50772	0.934357	0.855421	1.02058	0.1316	0	C07AB Beta blocking agents, selective	H	p6m	BMI	0.276
C07AB	C07AB	2.16553	1.32329	1.63648	8.71924	0.651695	116.658	0.1018	0	C07AB Beta blocking agents, selective	H	p6m	BMI	0.252
C07AB	bmi	0.052857	0.0212726	2.48474	1.05428	1.01122	1.09917	0.01297	-1	C07AB Beta blocking agents, selective	H	p6m	BMI	0.22
C08CA	C08CA1:bmi	0.0162866	0.0453259	0.359322	1.01642	0.930015	1.11085	0.7194	0	C08CA Dihydropyridine derivatives [DG:DG01928]	H	p6m	BMI	0.891
C08CA	bmi	0.0355882	0.0212281	1.67646	1.03623	0.993998	1.08025	0.09366	0	C08CA Dihydropyridine derivatives [DG:DG01928]	H	p6m	BMI	0.246
C08CA	C08CA	-0.689568	1.3706	-0.503114	0.501793	0.0341833	7.36605	0.6149	0	C08CA Dihydropyridine derivatives [DG:DG01928]	H	p6m	BMI	0.861
C09AA	C09AA	-0.47484	1.45941	-0.325366	0.621984	0.0356021	10.8663	0.7449	0	C09AA ACE inhibitors, plain [DG:DG01501]	H	p6m	BMI	0.891
C09AA	bmi	0.0396065	0.0211316	1.87428	1.0404	0.998189	1.0844	0.0609	0	C09AA ACE inhibitors, plain [DG:DG01501]	H	p6m	BMI	0.233
C09AA	C09AA1:bmi	0.0015462	0.0479592	0.0322399	1.00155	0.911689	1.10026	0.9743	0	C09AA ACE inhibitors, plain [DG:DG01501]	H	p6m	BMI	1
C09CA	C09CA1:bmi	-0.0201552	0.0565542	-0.356387	0.980047	0.877214	1.09493	0.7216	0	C09CA Angiotensin II receptor blockers, plain [DG:DG01495]	H	p6m	BMI	0.891
C09CA	C09CA	0.450057	1.71696	0.262125	1.5684	0.0541896	45.394	0.7932	0	C09CA Angiotensin II receptor blockers, plain [DG:DG01495]	H	p6m	BMI	0.9
C09CA	bmi	0.0417344	0.0205196	2.03388	1.04262	1.00152	1.08541	0.04197	-1	C09CA Angiotensin II receptor blockers, plain [DG:DG01495]	H	p6m	BMI	0.22
C10AA	C10AA1:bmi	-0.0255931	0.0367155	-0.697064	0.974732	0.90705	1.04746	0.4858	0	C10AA HMG CoA reductase inhibitors [DG:DG01660]	H	p6m	BMI	0.814
C10AA	bmi	0.0492797	0.0236913	2.08007	1.05051	1.00285	1.10045	0.03753	-1	C10AA HMG CoA reductase inhibitors [DG:DG01660]	H	p6m	BMI	0.22
C10AA	C10AA	0.485358	1.08458	0.447509	1.62476	0.193889	13.6152	0.6545	0	C10AA HMG CoA reductase inhibitors [DG:DG01660]	H	p6m	BMI	0.887
G03CA	G03CA	13.6007	7.64086	1.78	806726	0.252651	2.57592e+12	0.07509	0	G03CA Natural and semisynthetic estrogens, plain	H	p6m	BMI	0.246
G03CA	bmi	0.0407643	0.0193799	2.10344	1.04161	1.00278	1.08193	0.03544	-1	G03CA Natural and semisynthetic estrogens, plain	H	p6m	BMI	0.22
G03CA	G03CA1:bmi	-0.618114	0.365238	-1.69236	0.53896	0.263421	1.10271	0.09059	0	G03CA Natural and semisynthetic estrogens, plain	H	p6m	BMI	0.246
G04CB	bmi	0.0421069	0.0194264	2.16751	1.04301	1.00404	1.08349	0.0302	-1	G04CB Testosterone-5-alpha reductase inhibitors	H	p6m	BMI	0.22
G04CB	G04CB1:bmi	-0.21091	0.165286	-1.27603	0.809847	0.58574	1.1197	0.202	0	G04CB Testosterone-5-alpha reductase inhibitors	H	p6m	BMI	0.404
G04CB	G04CB	4.91872	4.37462	1.12438	136.828	0.0258418	724478	0.2609	0	G04CB Testosterone-5-alpha reductase inhibitors	H	p6m	BMI	0.498
H03AA	bmi	0.034958	0.0207243	1.68681	1.03558	0.994353	1.07851	0.09165	0	H03AA Thyroid hormones	H	p6m	BMI	0.246
H03AA	H03AA1:bmi	0.0280873	0.0520849	0.539261	1.02849	0.92867	1.13903	0.5897	0	H03AA Thyroid hormones	H	p6m	BMI	0.861
H03AA	H03AA	-0.596372	1.60517	-0.371533	0.550806	0.0236929	12.805	0.7102	0	H03AA Thyroid hormones	H	p6m	BMI	0.891
R03BA	R03BA	-3.24238	4.84903	-0.668666	0.0390709	2.91186e-06	524.247	0.5037	0	R03BA Glucocorticoids	H	p6m	BMI	0.814
R03BA	bmi	0.0376911	0.0195011	1.93277	1.03841	0.999468	1.07887	0.05327	0	R03BA Glucocorticoids	H	p6m	BMI	0.224
R03BA	R03BA1:bmi	0.0780268	0.150491	0.518482	1.08115	0.804976	1.45208	0.6041	0	R03BA Glucocorticoids	H	p6m	BMI	0.861
A02BC	A02BC	-0.0969602	0.0967033	-1.00266	0.907592	0.750846	1.09706	0.3161	0	A02BC Proton pump inhibitors [DG:DG01646]	A	p6m	CAD	0.531
A02BC	A02BC1:CAD1	-0.0017618	0.277365	-0.00635192	0.99824	0.579518	1.7195	0.9949	0	A02BC Proton pump inhibitors [DG:DG01646]	A	p6m	CAD	0.995
A02BC	CAD1	0.279217	0.187643	1.48802	1.32209	0.915145	1.91001	0.1368	0	A02BC Proton pump inhibitors [DG:DG01646]	A	p6m	CAD	0.314
A03AA	CAD1	0.277805	0.144395	1.92393	1.32023	0.994721	1.75225	0.05444	0	A03AA Synthetic anticholinergics, esters with tertiary amino group	A	p6m	CAD	0.211
A03AA	A03AA	0.312792	0.437472	0.714998	1.36724	0.579895	3.22358	0.4747	0	A03AA Synthetic anticholinergics, esters with tertiary amino group	A	p6m	CAD	0.665
A03AA	A03AA1:CAD1	-1.48212	1.91338	-0.774609	0.227156	0.00533507	9.6718	0.4386	0	A03AA Synthetic anticholinergics, esters with tertiary amino group	A	p6m	CAD	0.635
A10AE	CAD1	0.277552	0.144646	1.91884	1.3199	0.99398	1.75267	0.05508	0	A10AE Insulins and analogues for injection, long-acting	A	p6m	CAD	0.211
A10AE	A10AE	0.774001	0.649639	1.19143	2.16843	0.606731	7.74984	0.2336	0	A10AE Insulins and analogues for injection, long-acting	A	p6m	CAD	0.427
A10AE	A10AE1:CAD1	-0.950498	1.21036	-0.785305	0.386548	0.0360265	4.14749	0.4323	0	A10AE Insulins and analogues for injection, long-acting	A	p6m	CAD	0.635
A10BA	A10BA1:CAD1	0.0630005	0.459926	0.13698	1.06503	0.432263	2.62406	0.8911	0	A10BA Biguanides [DG:DG01684]	A	p6m	CAD	0.936
A10BA	A10BA	-0.372974	0.201182	-1.85391	0.688683	0.464215	1.02169	0.06383	0	A10BA Biguanides [DG:DG01684]	A	p6m	CAD	0.211
A10BA	CAD1	0.250576	0.151085	1.65852	1.28477	0.955388	1.7277	0.0973	0	A10BA Biguanides [DG:DG01684]	A	p6m	CAD	0.255
B01AC	B01AC	-0.197323	0.164659	-1.19838	0.820925	0.594431	1.13372	0.2308	0	B01AC Platelet aggregation inhibitors excl. heparin	A	p6m	CAD	0.427
B01AC	CAD1	0.369934	0.190549	1.94141	1.44764	0.996352	2.10333	0.05228	0	B01AC Platelet aggregation inhibitors excl. heparin	A	p6m	CAD	0.211
B01AC	B01AC1:CAD1	-0.0691411	0.306727	-0.225416	0.933195	0.51145	1.70271	0.8217	0	B01AC Platelet aggregation inhibitors excl. heparin	A	p6m	CAD	0.933
C07AB	CAD1	0.34869	0.174791	1.99489	1.41721	1.00601	1.99648	0.04613	-1	C07AB Beta blocking agents, selective	A	p6m	CAD	0.211
C07AB	C07AB	0.052401	0.161254	0.324959	1.0538	0.768165	1.44564	0.7452	0	C07AB Beta blocking agents, selective	A	p6m	CAD	0.894
C07AB	C07AB1:CAD1	-0.262193	0.31387	-0.835356	0.769363	0.415796	1.42358	0.4036	0	C07AB Beta blocking agents, selective	A	p6m	CAD	0.628
C08CA	C08CA1:CAD1	0.0564439	0.367669	0.153518	1.05807	0.514581	2.17557	0.878	0	C08CA Dihydropyridine derivatives [DG:DG01928]	A	p6m	CAD	0.936
C08CA	C08CA	-0.241373	0.12346	-1.95508	0.785549	0.616667	1.00068	0.05065	0	C08CA Dihydropyridine derivatives [DG:DG01928]	A	p6m	CAD	0.211
C08CA	CAD1	0.242704	0.157353	1.54241	1.27469	0.936318	1.73535	0.1231	0	C08CA Dihydropyridine derivatives [DG:DG01928]	A	p6m	CAD	0.304
C09AA	C09AA1:CAD1	-0.00943721	0.320825	-0.0294154	0.990607	0.528115	1.85812	0.9765	0	C09AA ACE inhibitors, plain [DG:DG01501]	A	p6m	CAD	0.995
C09AA	C09AA	-0.38569	0.137756	-2.7998	0.679982	0.519041	0.890825	0.005139	1	C09AA ACE inhibitors, plain [DG:DG01501]	A	p6m	CAD	0.108
C09AA	CAD1	0.302474	0.16714	1.80971	1.3532	0.975098	1.87792	0.07042	0	C09AA ACE inhibitors, plain [DG:DG01501]	A	p6m	CAD	0.211
C09CA	CAD1	0.295298	0.15427	1.91416	1.34353	0.992864	1.81804	0.05567	0	C09CA Angiotensin II receptor blockers, plain [DG:DG01495]	A	p6m	CAD	0.211
C09CA	C09CA1:CAD1	-0.182726	0.410792	-0.444815	0.832996	0.372277	1.86389	0.6565	0	C09CA Angiotensin II receptor blockers, plain [DG:DG01495]	A	p6m	CAD	0.889
C09CA	C09CA	-0.248938	0.169601	-1.46778	0.779628	0.559084	1.08717	0.1422	0	C09CA Angiotensin II receptor blockers, plain [DG:DG01495]	A	p6m	CAD	0.314
C10AA	CAD1	0.202234	0.221188	0.914311	1.22413	0.793404	1.8887	0.3606	0	C10AA HMG CoA reductase inhibitors [DG:DG01660]	A	p6m	CAD	0.583
C10AA	C10AA1:CAD1	0.294384	0.287266	1.02478	1.3423	0.764277	2.35748	0.3055	0	C10AA HMG CoA reductase inhibitors [DG:DG01660]	A	p6m	CAD	0.531
C10AA	C10AA	-0.600383	0.101799	-5.89771	0.548601	0.449343	0.669786	4.004e-09	1	C10AA HMG CoA reductase inhibitors [DG:DG01660]	A	p6m	CAD	1.68e-07
G03CA	CAD1	0.264109	0.144862	1.82318	1.30227	0.980292	1.73	0.06835	0	G03CA Natural and semisynthetic estrogens, plain	A	p6m	CAD	0.211
G03CA	G03CA1:CAD1	0.218662	1.17316	0.186387	1.24441	0.124753	12.413	0.8522	0	G03CA Natural and semisynthetic estrogens, plain	A	p6m	CAD	0.936
G03CA	G03CA	0.0753893	0.223649	0.337088	1.0783	0.695522	1.67175	0.7361	0	G03CA Natural and semisynthetic estrogens, plain	A	p6m	CAD	0.894
G04CB	G04CB	-0.136067	0.36881	-0.368934	0.872784	0.423522	1.79861	0.7122	0	G04CB Testosterone-5-alpha reductase inhibitors	A	p6m	CAD	0.894
G04CB	CAD1	0.280148	0.146622	1.91068	1.32333	0.99271	1.76405	0.05612	0	G04CB Testosterone-5-alpha reductase inhibitors	A	p6m	CAD	0.211
G04CB	G04CB1:CAD1	-0.258212	0.722591	-0.357341	0.772432	0.187325	3.18512	0.7209	0	G04CB Testosterone-5-alpha reductase inhibitors	A	p6m	CAD	0.894
H03AA	CAD1	0.31249	0.148184	2.10879	1.36682	1.02221	1.82763	0.03503	-1	H03AA Thyroid hormones	A	p6m	CAD	0.211
H03AA	H03AA1:CAD1	-0.841558	0.586049	-1.43599	0.431038	0.136619	1.35994	0.1511	0	H03AA Thyroid hormones	A	p6m	CAD	0.317
H03AA	H03AA	-0.229296	0.16665	-1.37591	0.795093	0.573483	1.10234	0.1689	0	H03AA Thyroid hormones	A	p6m	CAD	0.338
R03BA	R03BA	-0.598138	0.262201	-2.28122	0.549834	0.328833	0.919366	0.02259	1	R03BA Glucocorticoids	A	p6m	CAD	0.211
R03BA	CAD1	0.257804	0.145258	1.7748	1.29409	0.973374	1.72047	0.07601	0	R03BA Glucocorticoids	A	p6m	CAD	0.213
R03BA	R03BA1:CAD1	-0.2605	0.976642	-0.26673	0.770666	0.113575	5.22936	0.7897	0	R03BA Glucocorticoids	A	p6m	CAD	0.921
A02BC	A02BC	0.26999	0.234491	1.15139	1.30995	0.827166	2.07452	0.2496	0	A02BC Proton pump inhibitors [DG:DG01646]	B	p6m	CAD	0.87
A02BC	A02BC1:CAD1	0.00689577	0.497278	0.013867	1.00692	0.37982	2.66939	0.9889	0	A02BC Proton pump inhibitors [DG:DG01646]	B	p6m	CAD	1
A02BC	CAD1	0.237098	0.35605	0.665912	1.26757	0.630673	2.54763	0.5055	0	A02BC Proton pump inhibitors [DG:DG01646]	B	p6m	CAD	0.906
A03AA	CAD1	0.255868	0.267707	0.955776	1.29158	0.764148	2.18306	0.3392	0	A03AA Synthetic anticholinergics, esters with tertiary amino group	B	p6m	CAD	0.87
A03AA	A03AA	-14.1517	725.492	-0.0195064	7.14472e-07	0	Inf	0.9844	0	A03AA Synthetic anticholinergics, esters with tertiary amino group	B	p6m	CAD	1
A03AA	A03AA1:CAD1	-0.496179	2609.16	-0.000190168	0.608853	0	Inf	0.9998	0	A03AA Synthetic anticholinergics, esters with tertiary amino group	B	p6m	CAD	1
A10AE	CAD1	0.267343	0.27029	0.989097	1.30649	0.769062	2.21947	0.3227	0	A10AE Insulins and analogues for injection, long-acting	B	p6m	CAD	0.87
A10AE	A10AE	1.17709	0.931308	1.26391	3.24493	0.522666	20.1459	0.2063	0	A10AE Insulins and analogues for injection, long-acting	B	p6m	CAD	0.87
A10AE	A10AE1:CAD1	-0.122117	1.53864	-0.079367	0.885044	0.0433368	18.0748	0.9367	0	A10AE Insulins and analogues for injection, long-acting	B	p6m	CAD	1
A10BA	A10BA1:CAD1	-0.290256	0.839689	-0.345671	0.748072	0.144203	3.88073	0.7296	0	A10BA Biguanides [DG:DG01684]	B	p6m	CAD	1
A10BA	A10BA	-0.229941	0.478359	-0.480686	0.794581	0.311049	2.02977	0.6308	0	A10BA Biguanides [DG:DG01684]	B	p6m	CAD	1
A10BA	CAD1	0.283591	0.27818	1.01945	1.32789	0.769663	2.29099	0.3081	0	A10BA Biguanides [DG:DG01684]	B	p6m	CAD	0.87
B01AC	B01AC	-0.12879	0.342491	-0.376039	0.879159	0.449207	1.72063	0.7069	0	B01AC Platelet aggregation inhibitors excl. heparin	B	p6m	CAD	1
B01AC	CAD1	0.0759753	0.370359	0.205139	1.07894	0.52197	2.23021	0.8375	0	B01AC Platelet aggregation inhibitors excl. heparin	B	p6m	CAD	1
B01AC	B01AC1:CAD1	0.438507	0.560786	0.781951	1.55039	0.516355	4.65515	0.4343	0	B01AC Platelet aggregation inhibitors excl. heparin	B	p6m	CAD	0.906
C07AB	CAD1	0.312129	0.335305	0.930879	1.36633	0.708033	2.63668	0.352	0	C07AB Beta blocking agents, selective	B	p6m	CAD	0.87
C07AB	C07AB	0.750372	0.297311	2.52386	2.11779	1.18231	3.79344	0.01165	-1	C07AB Beta blocking agents, selective	B	p6m	CAD	0.489
C07AB	C07AB1:CAD1	-0.554754	0.535255	-1.03643	0.574213	0.201057	1.63994	0.3001	0	C07AB Beta blocking agents, selective	B	p6m	CAD	0.87
C08CA	C08CA1:CAD1	-0.924643	0.775193	-1.19279	0.396673	0.0867717	1.81337	0.233	0	C08CA Dihydropyridine derivatives [DG:DG01928]	B	p6m	CAD	0.87
C08CA	C08CA	0.0888187	0.272357	0.326111	1.09288	0.640721	1.86414	0.7444	0	C08CA Dihydropyridine derivatives [DG:DG01928]	B	p6m	CAD	1
C08CA	CAD1	0.396781	0.286822	1.38337	1.48703	0.847421	2.6094	0.1666	0	C08CA Dihydropyridine derivatives [DG:DG01928]	B	p6m	CAD	0.87
C09AA	C09AA1:CAD1	0.426198	0.589563	0.722905	1.53142	0.482059	4.86509	0.4698	0	C09AA ACE inhibitors, plain [DG:DG01501]	B	p6m	CAD	0.906
C09AA	C09AA	-0.231631	0.338356	-0.684578	0.793239	0.408605	1.53994	0.4937	0	C09AA ACE inhibitors, plain [DG:DG01501]	B	p6m	CAD	0.906
C09AA	CAD1	0.166455	0.307093	0.542037	1.18111	0.64686	2.15661	0.5878	0	C09AA ACE inhibitors, plain [DG:DG01501]	B	p6m	CAD	0.988
C09CA	CAD1	0.236625	0.288225	0.820973	1.26697	0.720028	2.22936	0.4117	0	C09CA Angiotensin II receptor blockers, plain [DG:DG01495]	B	p6m	CAD	0.906
C09CA	C09CA1:CAD1	0.186959	0.703106	0.265905	1.20558	0.303753	4.78486	0.7903	0	C09CA Angiotensin II receptor blockers, plain [DG:DG01495]	B	p6m	CAD	1
C09CA	C09CA	0.0163262	0.368194	0.0443413	1.01646	0.493837	2.09217	0.9646	0	C09CA Angiotensin II receptor blockers, plain [DG:DG01495]	B	p6m	CAD	1
C10AA	CAD1	0.254144	0.392645	0.647261	1.28936	0.597101	2.78419	0.5175	0	C10AA HMG CoA reductase inhibitors [DG:DG01660]	B	p6m	CAD	0.906
C10AA	C10AA1:CAD1	0.0291261	0.505323	0.0576386	1.02955	0.38228	2.77279	0.954	0	C10AA HMG CoA reductase inhibitors [DG:DG01660]	B	p6m	CAD	1
C10AA	C10AA	-0.0594241	0.230205	-0.258136	0.942307	0.60004	1.47981	0.7963	0	C10AA HMG CoA reductase inhibitors [DG:DG01660]	B	p6m	CAD	1
G03CA	CAD1	0.271308	0.267447	1.01444	1.31168	0.776434	2.21591	0.3104	0	G03CA Natural and semisynthetic estrogens, plain	B	p6m	CAD	0.87
G03CA	G03CA1:CAD1	-14.6742	1913.87	-0.0076673	4.23719e-07	0	Inf	0.9939	0	G03CA Natural and semisynthetic estrogens, plain	B	p6m	CAD	1
G03CA	G03CA	-0.341451	0.965741	-0.353563	0.710738	0.107006	4.72074	0.7237	0	G03CA Natural and semisynthetic estrogens, plain	B	p6m	CAD	1
G04CB	G04CB	-0.91067	0.821545	-1.10849	0.402254	0.0803488	2.01383	0.2677	0	G04CB Testosterone-5-alpha reductase inhibitors	B	p6m	CAD	0.87
G04CB	CAD1	0.260652	0.273622	0.9526	1.29778	0.75896	2.21912	0.3409	0	G04CB Testosterone-5-alpha reductase inhibitors	B	p6m	CAD	0.87
G04CB	G04CB1:CAD1	0.383328	1.2792	0.299662	1.46716	0.119475	18.0168	0.7645	0	G04CB Testosterone-5-alpha reductase inhibitors	B	p6m	CAD	1
H03AA	CAD1	0.356086	0.274278	1.29827	1.42773	0.833886	2.44447	0.1943	0	H03AA Thyroid hormones	B	p6m	CAD	0.87
H03AA	H03AA1:CAD1	-1.11537	1.0234	-1.08987	0.327793	0.0440767	2.43776	0.2758	0	H03AA Thyroid hormones	B	p6m	CAD	0.87
H03AA	H03AA	0.714773	0.357875	1.99727	2.04372	1.01322	4.12232	0.04587	-1	H03AA Thyroid hormones	B	p6m	CAD	0.87
R03BA	R03BA	-0.880291	0.998712	-0.881426	0.414662	0.0585221	2.93811	0.3781	0	R03BA Glucocorticoids	B	p6m	CAD	0.882
R03BA	CAD1	0.274118	0.267572	1.02446	1.31537	0.778427	2.22268	0.3057	0	R03BA Glucocorticoids	B	p6m	CAD	0.87
R03BA	R03BA1:CAD1	-14.5877	1479.38	-0.0098607	4.61991e-07	0	Inf	0.9921	0	R03BA Glucocorticoids	B	p6m	CAD	1
A02BC	A02BC	0.305853	0.0779396	3.92423	1.35778	1.16543	1.58188	8.702e-05	-1	A02BC Proton pump inhibitors [DG:DG01646]	C	p6m	CAD	0.00365
A02BC	A02BC1:CAD1	-0.17746	0.190658	-0.930774	0.837395	0.576291	1.2168	0.352	0	A02BC Proton pump inhibitors [DG:DG01646]	C	p6m	CAD	0.569
A02BC	CAD1	0.167327	0.130369	1.28349	1.18214	0.915586	1.5263	0.1993	0	A02BC Proton pump inhibitors [DG:DG01646]	C	p6m	CAD	0.513
A03AA	CAD1	0.1337	0.102389	1.3058	1.14305	0.935213	1.39707	0.1916	0	A03AA Synthetic anticholinergics, esters with tertiary amino group	C	p6m	CAD	0.513
A03AA	A03AA1:CAD1	-1.73267	1.66606	-1.03998	0.176812	0.00675075	4.63096	0.2984	0	A03AA Synthetic anticholinergics, esters with tertiary amino group	C	p6m	CAD	0.55
A03AA	A03AA	0.480343	0.323321	1.48566	1.61663	0.857824	3.04665	0.1374	0	A03AA Synthetic anticholinergics, esters with tertiary amino group	C	p6m	CAD	0.513
A10AE	CAD1	0.126371	0.103007	1.22682	1.1347	0.927262	1.38855	0.2199	0	A10AE Insulins and analogues for injection, long-acting	C	p6m	CAD	0.513
A10AE	A10AE1:CAD1	-0.307727	0.709718	-0.43359	0.735116	0.182912	2.95441	0.6646	0	A10AE Insulins and analogues for injection, long-acting	C	p6m	CAD	0.775
A10AE	A10AE	0.221659	0.359804	0.616055	1.24815	0.616593	2.52657	0.5379	0	A10AE Insulins and analogues for injection, long-acting	C	p6m	CAD	0.672
A10BA	A10BA	-0.0341546	0.152027	-0.224661	0.966422	0.717399	1.30189	0.8222	0	A10BA Biguanides [DG:DG01684]	C	p6m	CAD	0.863
A10BA	CAD1	0.145043	0.10765	1.34736	1.15609	0.93618	1.42766	0.1779	0	A10BA Biguanides [DG:DG01684]	C	p6m	CAD	0.513
A10BA	A10BA1:CAD1	-0.206399	0.29436	-0.701178	0.813508	0.456879	1.44851	0.4832	0	A10BA Biguanides [DG:DG01684]	C	p6m	CAD	0.663
B01AC	B01AC	0.126458	0.128737	0.982298	1.1348	0.881736	1.4605	0.326	0	B01AC Platelet aggregation inhibitors excl. heparin	C	p6m	CAD	0.569
B01AC	B01AC1:CAD1	-0.122398	0.216486	-0.565385	0.884796	0.578855	1.35244	0.5718	0	B01AC Platelet aggregation inhibitors excl. heparin	C	p6m	CAD	0.686
B01AC	CAD1	0.135549	0.131077	1.03412	1.14517	0.885717	1.48061	0.3011	0	B01AC Platelet aggregation inhibitors excl. heparin	C	p6m	CAD	0.55
C07AB	C07AB	0.19395	0.124073	1.5632	1.21404	0.951964	1.54826	0.118	0	C07AB Beta blocking agents, selective	C	p6m	CAD	0.513
C07AB	C07AB1:CAD1	-0.486841	0.220619	-2.20671	0.614565	0.398819	0.94702	0.02734	1	C07AB Beta blocking agents, selective	C	p6m	CAD	0.285
C07AB	CAD1	0.256638	0.120992	2.12111	1.29258	1.01969	1.6385	0.03391	-1	C07AB Beta blocking agents, selective	C	p6m	CAD	0.285
C08CA	C08CA	-0.0299714	0.0978716	-0.306232	0.970473	0.801078	1.17569	0.7594	0	C08CA Dihydropyridine derivatives [DG:DG01928]	C	p6m	CAD	0.839
C08CA	C08CA1:CAD1	-0.174572	0.252684	-0.690869	0.839817	0.511798	1.37807	0.4896	0	C08CA Dihydropyridine derivatives [DG:DG01928]	C	p6m	CAD	0.663
C08CA	CAD1	0.147758	0.11112	1.32972	1.15923	0.932363	1.44131	0.1836	0	C08CA Dihydropyridine derivatives [DG:DG01928]	C	p6m	CAD	0.513
C09AA	C09AA	-0.282386	0.112167	-2.51756	0.753982	0.60518	0.939373	0.01182	1	C09AA ACE inhibitors, plain [DG:DG01501]	C	p6m	CAD	0.165
C09AA	CAD1	0.14808	0.115748	1.27933	1.15961	0.924241	1.45491	0.2008	0	C09AA ACE inhibitors, plain [DG:DG01501]	C	p6m	CAD	0.513
C09AA	C09AA1:CAD1	-0.0343923	0.2292	-0.150054	0.966192	0.616549	1.51412	0.8807	0	C09AA ACE inhibitors, plain [DG:DG01501]	C	p6m	CAD	0.881
C09CA	C09CA	-0.0842166	0.133826	-0.629298	0.919232	0.70715	1.19492	0.5292	0	C09CA Angiotensin II receptor blockers, plain [DG:DG01495]	C	p6m	CAD	0.672
C09CA	CAD1	0.151982	0.108243	1.40408	1.16414	0.941603	1.43927	0.1603	0	C09CA Angiotensin II receptor blockers, plain [DG:DG01495]	C	p6m	CAD	0.513
C09CA	C09CA1:CAD1	-0.236462	0.295959	-0.798967	0.789416	0.441961	1.41003	0.4243	0	C09CA Angiotensin II receptor blockers, plain [DG:DG01495]	C	p6m	CAD	0.636
C10AA	C10AA	-0.254423	0.0811479	-3.13529	0.775364	0.661351	0.909032	0.001717	1	C10AA HMG CoA reductase inhibitors [DG:DG01660]	C	p6m	CAD	0.0361
C10AA	C10AA1:CAD1	0.0645975	0.193357	0.334084	1.06673	0.730244	1.55826	0.7383	0	C10AA HMG CoA reductase inhibitors [DG:DG01660]	C	p6m	CAD	0.838
C10AA	CAD1	0.12166	0.146413	0.830937	1.12937	0.847635	1.50475	0.406	0	C10AA HMG CoA reductase inhibitors [DG:DG01660]	C	p6m	CAD	0.632
G03CA	G03CA	0.290436	0.187559	1.54851	1.33701	0.925729	1.93102	0.1215	0	G03CA Natural and semisynthetic estrogens, plain	C	p6m	CAD	0.513
G03CA	CAD1	0.12257	0.102823	1.19204	1.1304	0.924076	1.38279	0.2332	0	G03CA Natural and semisynthetic estrogens, plain	C	p6m	CAD	0.515
G03CA	G03CA1:CAD1	-0.12815	0.809726	-0.158263	0.879722	0.17993	4.30117	0.8742	0	G03CA Natural and semisynthetic estrogens, plain	C	p6m	CAD	0.881
G04CB	CAD1	0.116603	0.103897	1.12229	1.12367	0.916647	1.37746	0.2617	0	G04CB Testosterone-5-alpha reductase inhibitors	C	p6m	CAD	0.55
G04CB	G04CB1:CAD1	0.119346	0.512687	0.232786	1.12676	0.412506	3.07775	0.8159	0	G04CB Testosterone-5-alpha reductase inhibitors	C	p6m	CAD	0.863
G04CB	G04CB	-0.188386	0.271433	-0.694044	0.828295	0.486564	1.41003	0.4877	0	G04CB Testosterone-5-alpha reductase inhibitors	C	p6m	CAD	0.663
H03AA	H03AA	-0.129302	0.136521	-0.947115	0.878709	0.672415	1.14829	0.3436	0	H03AA Thyroid hormones	C	p6m	CAD	0.569
H03AA	CAD1	0.151899	0.10412	1.45888	1.16404	0.949164	1.42757	0.1446	0	H03AA Thyroid hormones	C	p6m	CAD	0.513
H03AA	H03AA1:CAD1	-0.611627	0.45612	-1.34093	0.542468	0.221882	1.32625	0.1799	0	H03AA Thyroid hormones	C	p6m	CAD	0.513
R03BA	R03BA	0.232398	0.22008	1.05597	1.26162	0.819589	1.94206	0.291	0	R03BA Glucocorticoids	C	p6m	CAD	0.55
R03BA	CAD1	0.129623	0.102968	1.25886	1.1384	0.930352	1.39297	0.2081	0	R03BA Glucocorticoids	C	p6m	CAD	0.513
R03BA	R03BA1:CAD1	-0.426587	0.703082	-0.606739	0.652733	0.164539	2.58942	0.544	0	R03BA Glucocorticoids	C	p6m	CAD	0.672
A02BC	A02BC	0.508844	0.219551	2.31765	1.66337	1.0817	2.55783	0.02047	-1	A02BC Proton pump inhibitors [DG:DG01646]	D	p6m	CAD	0.532
A02BC	A02BC1:CAD1	-0.254251	0.44267	-0.574359	0.775497	0.32567	1.84664	0.5657	0	A02BC Proton pump inhibitors [DG:DG01646]	D	p6m	CAD	1
A02BC	CAD1	0.208123	0.317059	0.656416	1.23136	0.661461	2.29228	0.5116	0	A02BC Proton pump inhibitors [DG:DG01646]	D	p6m	CAD	1
A03AA	CAD1	0.130458	0.240463	0.54253	1.13935	0.711172	1.82532	0.5875	0	A03AA Synthetic anticholinergics, esters with tertiary amino group	D	p6m	CAD	1
A03AA	A03AA1:CAD1	-0.847809	1777.86	-0.00047687	0.428352	0	Inf	0.9996	0	A03AA Synthetic anticholinergics, esters with tertiary amino group	D	p6m	CAD	1
A03AA	A03AA	-13.5027	619.273	-0.0218041	1.36724e-06	0	Inf	0.9826	0	A03AA Synthetic anticholinergics, esters with tertiary amino group	D	p6m	CAD	1
A10AE	CAD1	0.141772	0.244398	0.580086	1.15231	0.713737	1.86039	0.5619	0	A10AE Insulins and analogues for injection, long-acting	D	p6m	CAD	1
A10AE	A10AE1:CAD1	-0.162845	1.14705	-0.141968	0.849723	0.0897232	8.0473	0.8871	0	A10AE Insulins and analogues for injection, long-acting	D	p6m	CAD	1
A10AE	A10AE	1.01384	0.740366	1.36937	2.75616	0.645804	11.7627	0.1709	0	A10AE Insulins and analogues for injection, long-acting	D	p6m	CAD	1
A10BA	A10BA	-0.171717	0.443551	-0.387142	0.842217	0.353078	2.00899	0.6987	0	A10BA Biguanides [DG:DG01684]	D	p6m	CAD	1
A10BA	CAD1	0.151645	0.250966	0.604245	1.16375	0.711599	1.90319	0.5457	0	A10BA Biguanides [DG:DG01684]	D	p6m	CAD	1
A10BA	A10BA1:CAD1	-0.211884	0.756291	-0.280162	0.809058	0.183747	3.56236	0.7794	0	A10BA Biguanides [DG:DG01684]	D	p6m	CAD	1
B01AC	B01AC	0.0752179	0.318223	0.236369	1.07812	0.577822	2.01159	0.8131	0	B01AC Platelet aggregation inhibitors excl. heparin	D	p6m	CAD	1
B01AC	B01AC1:CAD1	0.394881	0.505396	0.78133	1.48421	0.551187	3.9966	0.4346	0	B01AC Platelet aggregation inhibitors excl. heparin	D	p6m	CAD	1
B01AC	CAD1	-0.0906668	0.33202	-0.273077	0.913322	0.476439	1.75082	0.7848	0	B01AC Platelet aggregation inhibitors excl. heparin	D	p6m	CAD	1
C07AB	C07AB	0.606197	0.27108	2.23623	1.83345	1.07776	3.11898	0.02534	-1	C07AB Beta blocking agents, selective	D	p6m	CAD	0.532
C07AB	C07AB1:CAD1	-0.566612	0.475213	-1.19233	0.567445	0.223573	1.44021	0.2331	0	C07AB Beta blocking agents, selective	D	p6m	CAD	1
C07AB	CAD1	0.240805	0.300941	0.800173	1.27227	0.705371	2.29479	0.4236	0	C07AB Beta blocking agents, selective	D	p6m	CAD	1
C08CA	C08CA	0.0769644	0.254209	0.30276	1.08	0.656208	1.7775	0.7621	0	C08CA Dihydropyridine derivatives [DG:DG01928]	D	p6m	CAD	1
C08CA	C08CA1:CAD1	-1.11125	0.718835	-1.54591	0.329146	0.0804475	1.34668	0.1221	0	C08CA Dihydropyridine derivatives [DG:DG01928]	D	p6m	CAD	1
C08CA	CAD1	0.300322	0.256728	1.1698	1.35029	0.816394	2.23335	0.2421	0	C08CA Dihydropyridine derivatives [DG:DG01928]	D	p6m	CAD	1
C09AA	C09AA	-0.48528	0.319326	-1.5197	0.615525	0.329181	1.15095	0.1286	0	C09AA ACE inhibitors, plain [DG:DG01501]	D	p6m	CAD	1
C09AA	CAD1	0.0446906	0.278442	0.160502	1.0457	0.605896	1.80476	0.8725	0	C09AA ACE inhibitors, plain [DG:DG01501]	D	p6m	CAD	1
C09AA	C09AA1:CAD1	0.431953	0.52944	0.815868	1.54026	0.545674	4.34767	0.4146	0	C09AA ACE inhibitors, plain [DG:DG01501]	D	p6m	CAD	1
C09CA	C09CA	-0.012685	0.338617	-0.0374613	0.987395	0.508463	1.91745	0.9701	0	C09CA Angiotensin II receptor blockers, plain [DG:DG01495]	D	p6m	CAD	1
C09CA	CAD1	0.127507	0.259775	0.490836	1.13599	0.682738	1.89015	0.6235	0	C09CA Angiotensin II receptor blockers, plain [DG:DG01495]	D	p6m	CAD	1
C09CA	C09CA1:CAD1	0.0404278	0.622525	0.0649417	1.04126	0.30737	3.52739	0.9482	0	C09CA Angiotensin II receptor blockers, plain [DG:DG01495]	D	p6m	CAD	1
C10AA	C10AA	-0.0811452	0.216304	-0.375144	0.92206	0.603448	1.40889	0.7076	0	C10AA HMG CoA reductase inhibitors [DG:DG01660]	D	p6m	CAD	1
C10AA	C10AA1:CAD1	-0.163192	0.445911	-0.365974	0.849428	0.354458	2.03558	0.7144	0	C10AA HMG CoA reductase inhibitors [DG:DG01660]	D	p6m	CAD	1
C10AA	CAD1	0.238256	0.340318	0.700097	1.26903	0.651318	2.4726	0.4839	0	C10AA HMG CoA reductase inhibitors [DG:DG01660]	D	p6m	CAD	1
G03CA	G03CA	-0.161793	0.938625	-0.172372	0.850617	0.135137	5.35421	0.8631	0	G03CA Natural and semisynthetic estrogens, plain	D	p6m	CAD	1
G03CA	CAD1	0.140014	0.240477	0.582234	1.15029	0.71798	1.8429	0.5604	0	G03CA Natural and semisynthetic estrogens, plain	D	p6m	CAD	1
G03CA	G03CA1:CAD1	-12.5399	818.497	-0.0153206	3.58098e-06	0	Inf	0.9878	0	G03CA Natural and semisynthetic estrogens, plain	D	p6m	CAD	1
G04CB	CAD1	0.105862	0.245219	0.431706	1.11167	0.687455	1.79766	0.666	0	G04CB Testosterone-5-alpha reductase inhibitors	D	p6m	CAD	1
G04CB	G04CB1:CAD1	0.704518	1.16648	0.603967	2.02287	0.205614	19.9014	0.5459	0	G04CB Testosterone-5-alpha reductase inhibitors	D	p6m	CAD	1
G04CB	G04CB	-0.856819	0.779531	-1.09915	0.42451	0.0921187	1.95627	0.2717	0	G04CB Testosterone-5-alpha reductase inhibitors	D	p6m	CAD	1
H03AA	H03AA	0.547301	0.326955	1.67393	1.72858	0.910719	3.28092	0.09414	0	H03AA Thyroid hormones	D	p6m	CAD	1
H03AA	CAD1	0.210963	0.246547	0.855673	1.23487	0.761655	2.00208	0.3922	0	H03AA Thyroid hormones	D	p6m	CAD	1
H03AA	H03AA1:CAD1	-0.899543	0.885199	-1.0162	0.406755	0.0717544	2.30578	0.3095	0	H03AA Thyroid hormones	D	p6m	CAD	1
R03BA	R03BA	-0.162981	0.973866	-0.167354	0.849608	0.125968	5.73029	0.8671	0	R03BA Glucocorticoids	D	p6m	CAD	1
R03BA	CAD1	0.144129	0.240462	0.599384	1.15503	0.720962	1.85045	0.5489	0	R03BA Glucocorticoids	D	p6m	CAD	1
R03BA	R03BA1:CAD1	-12.8348	678.93	-0.0189044	2.66642e-06	0	Inf	0.9849	0	R03BA Glucocorticoids	D	p6m	CAD	1
A02BC	A02BC	0.393448	0.0433775	9.07032	1.48208	1.36129	1.6136	1.192e-19	-1	A02BC Proton pump inhibitors [DG:DG01646]	E	p6m	CAD	5.01e-18
A02BC	A02BC1:CAD1	-0.143616	0.130976	-1.0965	0.866221	0.670102	1.11974	0.2729	0	A02BC Proton pump inhibitors [DG:DG01646]	E	p6m	CAD	0.551
A02BC	CAD1	0.0693969	0.0885108	0.78405	1.07186	0.901152	1.27491	0.433	0	A02BC Proton pump inhibitors [DG:DG01646]	E	p6m	CAD	0.562
A03AA	CAD1	0.0571094	0.068946	0.82832	1.05877	0.924943	1.21196	0.4075	0	A03AA Synthetic anticholinergics, esters with tertiary amino group	E	p6m	CAD	0.562
A03AA	A03AA1:CAD1	-0.57449	0.77417	-0.742072	0.562992	0.12346	2.56732	0.458	0	A03AA Synthetic anticholinergics, esters with tertiary amino group	E	p6m	CAD	0.566
A03AA	A03AA	0.296409	0.207164	1.43079	1.34502	0.896169	2.01868	0.1525	0	A03AA Synthetic anticholinergics, esters with tertiary amino group	E	p6m	CAD	0.551
A10AE	CAD1	0.0495991	0.0691691	0.71707	1.05085	0.917621	1.20342	0.4733	0	A10AE Insulins and analogues for injection, long-acting	E	p6m	CAD	0.568
A10AE	A10AE1:CAD1	0.165902	0.568215	0.291971	1.18046	0.387599	3.59516	0.7703	0	A10AE Insulins and analogues for injection, long-acting	E	p6m	CAD	0.789
A10AE	A10AE	-0.277475	0.292412	-0.948919	0.757695	0.427161	1.34399	0.3427	0	A10AE Insulins and analogues for injection, long-acting	E	p6m	CAD	0.562
A10BA	A10BA	0.159197	0.0911044	1.74741	1.17257	0.980821	1.4018	0.08057	0	A10BA Biguanides [DG:DG01684]	E	p6m	CAD	0.357
A10BA	CAD1	0.0803658	0.071957	1.11686	1.08368	0.941136	1.24782	0.2641	0	A10BA Biguanides [DG:DG01684]	E	p6m	CAD	0.551
A10BA	A10BA1:CAD1	-0.258606	0.21353	-1.2111	0.772127	0.508079	1.1734	0.2259	0	A10BA Biguanides [DG:DG01684]	E	p6m	CAD	0.551
B01AC	B01AC	0.296522	0.0756882	3.91767	1.34517	1.15972	1.56029	8.942e-05	-1	B01AC Platelet aggregation inhibitors excl. heparin	E	p6m	CAD	0.00125
B01AC	B01AC1:CAD1	-0.17731	0.144475	-1.22727	0.83752	0.630982	1.11166	0.2197	0	B01AC Platelet aggregation inhibitors excl. heparin	E	p6m	CAD	0.551
B01AC	CAD1	0.0318172	0.0904217	0.351876	1.03233	0.864671	1.2325	0.7249	0	B01AC Platelet aggregation inhibitors excl. heparin	E	p6m	CAD	0.761
C07AB	C07AB	0.223655	0.0753871	2.96675	1.25064	1.07885	1.44978	0.00301	-1	C07AB Beta blocking agents, selective	E	p6m	CAD	0.0253
C07AB	C07AB1:CAD1	-0.397328	0.148567	-2.6744	0.672113	0.502321	0.899298	0.007487	1	C07AB Beta blocking agents, selective	E	p6m	CAD	0.0524
C07AB	CAD1	0.142855	0.0829389	1.72241	1.15356	0.98049	1.35718	0.085	0	C07AB Beta blocking agents, selective	E	p6m	CAD	0.357
C08CA	C08CA	0.127987	0.0556987	2.29784	1.13654	1.019	1.26764	0.02157	-1	C08CA Dihydropyridine derivatives [DG:DG01928]	E	p6m	CAD	0.129
C08CA	C08CA1:CAD1	-0.133408	0.172092	-0.775213	0.875108	0.624563	1.22616	0.4382	0	C08CA Dihydropyridine derivatives [DG:DG01928]	E	p6m	CAD	0.562
C08CA	CAD1	0.0825557	0.0748744	1.10259	1.08606	0.937821	1.25773	0.2702	0	C08CA Dihydropyridine derivatives [DG:DG01928]	E	p6m	CAD	0.551
C09AA	C09AA	0.00183339	0.0604416	0.0303332	1.00184	0.889914	1.12783	0.9758	0	C09AA ACE inhibitors, plain [DG:DG01501]	E	p6m	CAD	0.976
C09AA	CAD1	0.088601	0.0794832	1.11471	1.09264	0.935024	1.27684	0.265	0	C09AA ACE inhibitors, plain [DG:DG01501]	E	p6m	CAD	0.551
C09AA	C09AA1:CAD1	-0.127884	0.149241	-0.856896	0.879955	0.656789	1.17895	0.3915	0	C09AA ACE inhibitors, plain [DG:DG01501]	E	p6m	CAD	0.562
C09CA	C09CA	0.0849112	0.0765404	1.10936	1.08862	0.936968	1.26482	0.2673	0	C09CA Angiotensin II receptor blockers, plain [DG:DG01495]	E	p6m	CAD	0.551
C09CA	CAD1	0.0671401	0.0735511	0.912836	1.06945	0.925873	1.23528	0.3613	0	C09CA Angiotensin II receptor blockers, plain [DG:DG01495]	E	p6m	CAD	0.562
C09CA	C09CA1:CAD1	-0.117001	0.190888	-0.612928	0.889585	0.611931	1.29322	0.5399	0	C09CA Angiotensin II receptor blockers, plain [DG:DG01495]	E	p6m	CAD	0.63
C10AA	C10AA	0.146323	0.0441128	3.31701	1.15757	1.06169	1.26211	0.0009099	-1	C10AA HMG CoA reductase inhibitors [DG:DG01660]	E	p6m	CAD	0.00955
C10AA	C10AA1:CAD1	-0.140867	0.132709	-1.06147	0.868605	0.669669	1.12664	0.2885	0	C10AA HMG CoA reductase inhibitors [DG:DG01660]	E	p6m	CAD	0.551
C10AA	CAD1	0.109918	0.102347	1.07398	1.11619	0.913312	1.36413	0.2828	0	C10AA HMG CoA reductase inhibitors [DG:DG01660]	E	p6m	CAD	0.551
G03CA	G03CA	0.208591	0.0948184	2.1999	1.23194	1.02301	1.48354	0.02781	-1	G03CA Natural and semisynthetic estrogens, plain	E	p6m	CAD	0.146
G03CA	CAD1	0.0553776	0.06916	0.800717	1.05694	0.922956	1.21037	0.4233	0	G03CA Natural and semisynthetic estrogens, plain	E	p6m	CAD	0.562
G03CA	G03CA1:CAD1	-0.221066	0.560634	-0.394315	0.801663	0.267164	2.40551	0.6933	0	G03CA Natural and semisynthetic estrogens, plain	E	p6m	CAD	0.747
G04CB	CAD1	0.0395228	0.0699856	0.564728	1.04031	0.906969	1.19326	0.5723	0	G04CB Testosterone-5-alpha reductase inhibitors	E	p6m	CAD	0.65
G04CB	G04CB1:CAD1	0.382912	0.349119	1.0968	1.46655	0.739819	2.90715	0.2727	0	G04CB Testosterone-5-alpha reductase inhibitors	E	p6m	CAD	0.551
G04CB	G04CB	-0.147477	0.175951	-0.838171	0.862882	0.611197	1.21821	0.4019	0	G04CB Testosterone-5-alpha reductase inhibitors	E	p6m	CAD	0.562
H03AA	H03AA	0.0345538	0.0710675	0.486211	1.03516	0.900562	1.18987	0.6268	0	H03AA Thyroid hormones	E	p6m	CAD	0.693
H03AA	CAD1	0.0659082	0.0707765	0.931216	1.06813	0.929776	1.22707	0.3517	0	H03AA Thyroid hormones	E	p6m	CAD	0.562
H03AA	H03AA1:CAD1	-0.198995	0.258574	-0.769586	0.819554	0.493718	1.36043	0.4415	0	H03AA Thyroid hormones	E	p6m	CAD	0.562
R03BA	R03BA	0.544399	0.106373	5.11781	1.72357	1.39921	2.12312	3.092e-07	-1	R03BA Glucocorticoids	E	p6m	CAD	6.49e-06
R03BA	CAD1	0.066917	0.0693555	0.964839	1.06921	0.93331	1.22489	0.3346	0	R03BA Glucocorticoids	E	p6m	CAD	0.562
R03BA	R03BA1:CAD1	-0.493837	0.449761	-1.098	0.61028	0.25275	1.47356	0.2722	0	R03BA Glucocorticoids	E	p6m	CAD	0.551
A02BC	A02BC	-0.333168	0.0456386	-7.30014	0.71665	0.655327	0.783711	2.944e-13	1	A02BC Proton pump inhibitors [DG:DG01646]	F	p6m	CAD	1.24e-11
A02BC	A02BC1:CAD1	0.137071	0.139961	0.979348	1.14691	0.871744	1.50893	0.3274	0	A02BC Proton pump inhibitors [DG:DG01646]	F	p6m	CAD	0.879
A02BC	CAD1	-0.0104895	0.0955256	-0.109808	0.989565	0.820597	1.19333	0.9126	0	A02BC Proton pump inhibitors [DG:DG01646]	F	p6m	CAD	0.94
A03AA	CAD1	0.0220668	0.0735859	0.299879	1.02231	0.885003	1.18093	0.7643	0	A03AA Synthetic anticholinergics, esters with tertiary amino group	F	p6m	CAD	0.94
A03AA	A03AA1:CAD1	-0.568112	0.79907	-0.710966	0.566594	0.118325	2.71312	0.4771	0	A03AA Synthetic anticholinergics, esters with tertiary amino group	F	p6m	CAD	0.926
A03AA	A03AA	-0.357631	0.218033	-1.64027	0.699331	0.456127	1.07221	0.101	0	A03AA Synthetic anticholinergics, esters with tertiary amino group	F	p6m	CAD	0.418
A10AE	A10AE	-0.710775	0.305496	-2.32663	0.491263	0.269939	0.894053	0.01999	1	A10AE Insulins and analogues for injection, long-acting	F	p6m	CAD	0.14
A10AE	CAD1	0.0118888	0.0738381	0.161011	1.01196	0.875608	1.16954	0.8721	0	A10AE Insulins and analogues for injection, long-acting	F	p6m	CAD	0.94
A10AE	A10AE1:CAD1	0.279478	0.603075	0.463422	1.32244	0.405524	4.31256	0.6431	0	A10AE Insulins and analogues for injection, long-acting	F	p6m	CAD	0.94
A10BA	A10BA	0.0676519	0.0996916	0.678612	1.06999	0.880075	1.30089	0.4974	0	A10BA Biguanides [DG:DG01684]	F	p6m	CAD	0.926
A10BA	A10BA1:CAD1	-0.171382	0.229222	-0.74767	0.8425	0.537587	1.32036	0.4547	0	A10BA Biguanides [DG:DG01684]	F	p6m	CAD	0.926
A10BA	CAD1	0.035064	0.0768612	0.456199	1.03569	0.890843	1.20408	0.6483	0	A10BA Biguanides [DG:DG01684]	F	p6m	CAD	0.94
B01AC	B01AC	-0.140538	0.0798544	-1.75993	0.86889	0.743002	1.01611	0.07843	0	B01AC Platelet aggregation inhibitors excl. heparin	F	p6m	CAD	0.366
B01AC	B01AC1:CAD1	0.041461	0.154247	0.268796	1.04233	0.770381	1.41028	0.7881	0	B01AC Platelet aggregation inhibitors excl. heparin	F	p6m	CAD	0.94
B01AC	CAD1	0.0469527	0.0970915	0.483592	1.04807	0.86645	1.26777	0.6287	0	B01AC Platelet aggregation inhibitors excl. heparin	F	p6m	CAD	0.94
C07AB	C07AB1:CAD1	-0.136858	0.157907	-0.866701	0.872094	0.639952	1.18844	0.3861	0	C07AB Beta blocking agents, selective	F	p6m	CAD	0.901
C07AB	C07AB	-0.211422	0.0792794	-2.6668	0.809432	0.692939	0.94551	0.007662	1	C07AB Beta blocking agents, selective	F	p6m	CAD	0.0644
C07AB	CAD1	0.128372	0.089392	1.43606	1.13698	0.95424	1.35471	0.151	0	C07AB Beta blocking agents, selective	F	p6m	CAD	0.494
C08CA	C08CA	-0.084795	0.0593313	-1.42918	0.918701	0.817842	1.032	0.153	0	C08CA Dihydropyridine derivatives [DG:DG01928]	F	p6m	CAD	0.494
C08CA	C08CA1:CAD1	-0.0189778	0.183522	-0.103409	0.981201	0.684759	1.40598	0.9176	0	C08CA Dihydropyridine derivatives [DG:DG01928]	F	p6m	CAD	0.94
C08CA	CAD1	0.0143269	0.0800998	0.178863	1.01443	0.867038	1.18688	0.858	0	C08CA Dihydropyridine derivatives [DG:DG01928]	F	p6m	CAD	0.94
C09AA	C09AA	-0.141356	0.0641163	-2.20468	0.86818	0.765653	0.984437	0.02748	1	C09AA ACE inhibitors, plain [DG:DG01501]	F	p6m	CAD	0.144
C09AA	CAD1	0.0565095	0.0851895	0.663339	1.05814	0.895417	1.25043	0.5071	0	C09AA ACE inhibitors, plain [DG:DG01501]	F	p6m	CAD	0.926
C09AA	C09AA1:CAD1	-0.0888653	0.159047	-0.558735	0.914969	0.669915	1.24966	0.5763	0	C09AA ACE inhibitors, plain [DG:DG01501]	F	p6m	CAD	0.94
C09CA	CAD1	0.0121253	0.0787025	0.154065	1.0122	0.867504	1.18103	0.8776	0	C09CA Angiotensin II receptor blockers, plain [DG:DG01495]	F	p6m	CAD	0.94
C09CA	C09CA1:CAD1	0.0471514	0.203071	0.232191	1.04828	0.704071	1.56077	0.8164	0	C09CA Angiotensin II receptor blockers, plain [DG:DG01495]	F	p6m	CAD	0.94
C09CA	C09CA	-0.180171	0.0814871	-2.21104	0.835127	0.711849	0.979755	0.02704	1	C09CA Angiotensin II receptor blockers, plain [DG:DG01495]	F	p6m	CAD	0.144
C10AA	C10AA1:CAD1	-0.131773	0.142647	-0.92377	0.87654	0.662744	1.1593	0.3556	0	C10AA HMG CoA reductase inhibitors [DG:DG01660]	F	p6m	CAD	0.879
C10AA	C10AA	-0.0459298	0.0470862	-0.97544	0.955109	0.870906	1.04745	0.3293	0	C10AA HMG CoA reductase inhibitors [DG:DG01660]	F	p6m	CAD	0.879
C10AA	CAD1	0.105351	0.110685	0.951811	1.1111	0.894406	1.38029	0.3412	0	C10AA HMG CoA reductase inhibitors [DG:DG01660]	F	p6m	CAD	0.879
G03CA	G03CA	-0.460882	0.100281	-4.59593	0.630727	0.518178	0.767721	4.325e-06	1	G03CA Natural and semisynthetic estrogens, plain	F	p6m	CAD	9.08e-05
G03CA	CAD1	0.0161452	0.0738298	0.218681	1.01628	0.879357	1.17451	0.8269	0	G03CA Natural and semisynthetic estrogens, plain	F	p6m	CAD	0.94
G03CA	G03CA1:CAD1	-0.0707971	0.582175	-0.121608	0.931651	0.297636	2.91622	0.9032	0	G03CA Natural and semisynthetic estrogens, plain	F	p6m	CAD	0.94
G04CB	CAD1	-0.00184505	0.0747677	-0.0246772	0.998157	0.862092	1.1557	0.9803	0	G04CB Testosterone-5-alpha reductase inhibitors	F	p6m	CAD	0.98
G04CB	G04CB1:CAD1	0.587758	0.367209	1.60061	1.79995	0.876352	3.69693	0.1095	0	G04CB Testosterone-5-alpha reductase inhibitors	F	p6m	CAD	0.418
G04CB	G04CB	-0.582211	0.181835	-3.20186	0.558662	0.391169	0.797873	0.001367	1	G04CB Testosterone-5-alpha reductase inhibitors	F	p6m	CAD	0.0191
H03AA	H03AA	-0.217644	0.0756405	-2.87735	0.804412	0.69357	0.932967	0.004013	1	H03AA Thyroid hormones	F	p6m	CAD	0.0421
H03AA	CAD1	0.0167522	0.0755987	0.221594	1.01689	0.876846	1.17931	0.8246	0	H03AA Thyroid hormones	F	p6m	CAD	0.94
H03AA	H03AA1:CAD1	-0.0343572	0.27196	-0.126332	0.966226	0.566993	1.64657	0.8995	0	H03AA Thyroid hormones	F	p6m	CAD	0.94
R03BA	R03BA	-0.0906579	0.113807	-0.796595	0.91333	0.730721	1.14157	0.4257	0	R03BA Glucocorticoids	F	p6m	CAD	0.926
R03BA	CAD1	0.0217268	0.0740749	0.293308	1.02196	0.883854	1.18166	0.7693	0	R03BA Glucocorticoids	F	p6m	CAD	0.94
R03BA	R03BA1:CAD1	-0.265869	0.471211	-0.564225	0.76654	0.304385	1.93039	0.5726	0	R03BA Glucocorticoids	F	p6m	CAD	0.94
A02BC	A02BC	-0.366243	0.0785109	-4.66486	0.693334	0.594445	0.808676	3.102e-06	1	A02BC Proton pump inhibitors [DG:DG01646]	G	p6m	CAD	6.51e-05
A02BC	A02BC1:CAD1	0.0891402	0.19741	0.451548	1.09323	0.742455	1.60974	0.6516	0	A02BC Proton pump inhibitors [DG:DG01646]	G	p6m	CAD	0.851
A02BC	CAD1	0.104407	0.135288	0.771743	1.11005	0.851494	1.44712	0.4403	0	A02BC Proton pump inhibitors [DG:DG01646]	G	p6m	CAD	0.628
A03AA	CAD1	0.12299	0.105077	1.17048	1.13087	0.920383	1.3895	0.2418	0	A03AA Synthetic anticholinergics, esters with tertiary amino group	G	p6m	CAD	0.532
A03AA	A03AA1:CAD1	-1.75995	1.66944	-1.05421	0.172054	0.00652487	4.53688	0.2918	0	A03AA Synthetic anticholinergics, esters with tertiary amino group	G	p6m	CAD	0.532
A03AA	A03AA	-0.0889328	0.329436	-0.269954	0.914907	0.479676	1.74504	0.7872	0	A03AA Synthetic anticholinergics, esters with tertiary amino group	G	p6m	CAD	0.903
A10AE	A10AE	-0.232013	0.369511	-0.627893	0.792935	0.384323	1.63599	0.5301	0	A10AE Insulins and analogues for injection, long-acting	G	p6m	CAD	0.718
A10AE	CAD1	0.110363	0.105797	1.04316	1.11668	0.907552	1.37401	0.2969	0	A10AE Insulins and analogues for injection, long-acting	G	p6m	CAD	0.532
A10AE	A10AE1:CAD1	-0.0661235	0.737293	-0.0896841	0.936015	0.220633	3.97096	0.9285	0	A10AE Insulins and analogues for injection, long-acting	G	p6m	CAD	0.958
A10BA	A10BA	-0.120547	0.156755	-0.769012	0.886436	0.651945	1.20527	0.4419	0	A10BA Biguanides [DG:DG01684]	G	p6m	CAD	0.628
A10BA	A10BA1:CAD1	-0.131441	0.306786	-0.428446	0.876831	0.480583	1.59979	0.6683	0	A10BA Biguanides [DG:DG01684]	G	p6m	CAD	0.851
A10BA	CAD1	0.124246	0.110544	1.12395	1.13229	0.911718	1.40624	0.261	0	A10BA Biguanides [DG:DG01684]	G	p6m	CAD	0.532
B01AC	B01AC	-0.241995	0.130693	-1.85163	0.78506	0.607648	1.01427	0.06409	0	B01AC Platelet aggregation inhibitors excl. heparin	G	p6m	CAD	0.269
B01AC	B01AC1:CAD1	0.0310145	0.223274	0.138908	1.0315	0.665902	1.59782	0.8895	0	B01AC Platelet aggregation inhibitors excl. heparin	G	p6m	CAD	0.958
B01AC	CAD1	0.178383	0.135617	1.31535	1.19528	0.916281	1.55924	0.1884	0	B01AC Platelet aggregation inhibitors excl. heparin	G	p6m	CAD	0.532
C07AB	C07AB1:CAD1	-0.308996	0.226924	-1.36168	0.734183	0.470585	1.14544	0.1733	0	C07AB Beta blocking agents, selective	G	p6m	CAD	0.532
C07AB	C07AB	-0.174316	0.125737	-1.38636	0.840031	0.656543	1.0748	0.1656	0	C07AB Beta blocking agents, selective	G	p6m	CAD	0.532
C07AB	CAD1	0.276416	0.124803	2.21481	1.3184	1.03231	1.68377	0.02678	-1	C07AB Beta blocking agents, selective	G	p6m	CAD	0.141
C08CA	C08CA	-0.221483	0.0998005	-2.21925	0.80133	0.658957	0.974463	0.02648	1	C08CA Dihydropyridine derivatives [DG:DG01928]	G	p6m	CAD	0.141
C08CA	C08CA1:CAD1	-0.056508	0.261506	-0.216087	0.945059	0.56605	1.57784	0.8289	0	C08CA Dihydropyridine derivatives [DG:DG01928]	G	p6m	CAD	0.916
C08CA	CAD1	0.103584	0.114219	0.906891	1.10914	0.886663	1.38744	0.3645	0	C08CA Dihydropyridine derivatives [DG:DG01928]	G	p6m	CAD	0.581
C09AA	C09AA	-0.382697	0.113538	-3.37065	0.68202	0.545945	0.85201	0.0007509	1	C09AA ACE inhibitors, plain [DG:DG01501]	G	p6m	CAD	0.0105
C09AA	CAD1	0.146287	0.119235	1.22689	1.15753	0.916294	1.46227	0.2199	0	C09AA ACE inhibitors, plain [DG:DG01501]	G	p6m	CAD	0.532
C09AA	C09AA1:CAD1	-0.0159614	0.235904	-0.0676608	0.984165	0.619809	1.56271	0.9461	0	C09AA ACE inhibitors, plain [DG:DG01501]	G	p6m	CAD	0.958
C09CA	CAD1	0.12593	0.111363	1.1308	1.1342	0.911788	1.41087	0.2581	0	C09CA Angiotensin II receptor blockers, plain [DG:DG01495]	G	p6m	CAD	0.532
C09CA	C09CA1:CAD1	-0.109281	0.304665	-0.358692	0.896479	0.493399	1.62885	0.7198	0	C09CA Angiotensin II receptor blockers, plain [DG:DG01495]	G	p6m	CAD	0.889
C09CA	C09CA	-0.308323	0.136375	-2.26085	0.734678	0.562354	0.959808	0.02378	1	C09CA Angiotensin II receptor blockers, plain [DG:DG01495]	G	p6m	CAD	0.141
C10AA	C10AA1:CAD1	0.0519445	0.200672	0.258853	1.05332	0.710788	1.56091	0.7958	0	C10AA HMG CoA reductase inhibitors [DG:DG01660]	G	p6m	CAD	0.903
C10AA	C10AA	-0.430306	0.0827022	-5.20308	0.65031	0.552995	0.76475	1.974e-07	1	C10AA HMG CoA reductase inhibitors [DG:DG01660]	G	p6m	CAD	8.29e-06
C10AA	CAD1	0.152338	0.152103	1.00155	1.16455	0.864338	1.56905	0.3166	0	C10AA HMG CoA reductase inhibitors [DG:DG01660]	G	p6m	CAD	0.532
G03CA	G03CA	-0.357699	0.190227	-1.88038	0.699284	0.481643	1.01527	0.06007	0	G03CA Natural and semisynthetic estrogens, plain	G	p6m	CAD	0.269
G03CA	CAD1	0.109867	0.105541	1.04099	1.11613	0.907558	1.37263	0.2979	0	G03CA Natural and semisynthetic estrogens, plain	G	p6m	CAD	0.532
G03CA	G03CA1:CAD1	-0.0436178	0.823661	-0.052956	0.95732	0.190513	4.81048	0.9578	0	G03CA Natural and semisynthetic estrogens, plain	G	p6m	CAD	0.958
G04CB	CAD1	0.0950417	0.106856	0.889435	1.0997	0.8919	1.35593	0.3738	0	G04CB Testosterone-5-alpha reductase inhibitors	G	p6m	CAD	0.581
G04CB	G04CB1:CAD1	0.398625	0.526404	0.75726	1.48977	0.530915	4.18038	0.4489	0	G04CB Testosterone-5-alpha reductase inhibitors	G	p6m	CAD	0.628
G04CB	G04CB	-0.613451	0.27552	-2.22652	0.541479	0.315535	0.929212	0.02599	1	G04CB Testosterone-5-alpha reductase inhibitors	G	p6m	CAD	0.141
H03AA	H03AA	-0.360533	0.13879	-2.59768	0.697305	0.531226	0.915306	0.009391	1	H03AA Thyroid hormones	G	p6m	CAD	0.0986
H03AA	CAD1	0.130737	0.106961	1.22228	1.13967	0.924121	1.40549	0.2216	0	H03AA Thyroid hormones	G	p6m	CAD	0.532
H03AA	H03AA1:CAD1	-0.466181	0.464786	-1.003	0.627394	0.252288	1.56021	0.3159	0	H03AA Thyroid hormones	G	p6m	CAD	0.532
R03BA	R03BA	-0.358618	0.223345	-1.60567	0.698641	0.450956	1.08237	0.1084	0	R03BA Glucocorticoids	G	p6m	CAD	0.414
R03BA	CAD1	0.111159	0.105719	1.05146	1.11757	0.908414	1.37489	0.2931	0	R03BA Glucocorticoids	G	p6m	CAD	0.532
R03BA	R03BA1:CAD1	-0.20401	0.718264	-0.284032	0.815454	0.19952	3.33283	0.7764	0	R03BA Glucocorticoids	G	p6m	CAD	0.903
A02BC	A02BC	-0.0466186	0.219135	-0.212739	0.954451	0.621179	1.46653	0.8315	0	A02BC Proton pump inhibitors [DG:DG01646]	H	p6m	CAD	1
A02BC	A02BC1:CAD1	-0.0371194	0.451728	-0.0821719	0.963561	0.397512	2.33565	0.9345	0	A02BC Proton pump inhibitors [DG:DG01646]	H	p6m	CAD	1
A02BC	CAD1	0.175282	0.324217	0.540634	1.19158	0.631158	2.24963	0.5888	0	A02BC Proton pump inhibitors [DG:DG01646]	H	p6m	CAD	0.914
A03AA	CAD1	0.151212	0.243755	0.620345	1.16324	0.721401	1.8757	0.535	0	A03AA Synthetic anticholinergics, esters with tertiary amino group	H	p6m	CAD	0.914
A03AA	A03AA1:CAD1	-0.666675	1726.03	-0.000386247	0.513413	0	Inf	0.9997	0	A03AA Synthetic anticholinergics, esters with tertiary amino group	H	p6m	CAD	1
A03AA	A03AA	-14.0592	638.882	-0.022006	7.83719e-07	0	Inf	0.9824	0	A03AA Synthetic anticholinergics, esters with tertiary amino group	H	p6m	CAD	1
A10AE	A10AE	0.486142	0.743451	0.653899	1.62603	0.378682	6.98205	0.5132	0	A10AE Insulins and analogues for injection, long-acting	H	p6m	CAD	0.914
A10AE	CAD1	0.139568	0.248223	0.562272	1.14978	0.706833	1.8703	0.5739	0	A10AE Insulins and analogues for injection, long-acting	H	p6m	CAD	0.914
A10AE	A10AE1:CAD1	0.552597	1.18639	0.465781	1.73776	0.169859	17.7783	0.6414	0	A10AE Insulins and analogues for injection, long-acting	H	p6m	CAD	0.914
A10BA	A10BA	-0.253708	0.447918	-0.566415	0.775919	0.322501	1.86682	0.5711	0	A10BA Biguanides [DG:DG01684]	H	p6m	CAD	0.914
A10BA	A10BA1:CAD1	-0.214288	0.773512	-0.277032	0.807116	0.177212	3.67604	0.7818	0	A10BA Biguanides [DG:DG01684]	H	p6m	CAD	0.995
A10BA	CAD1	0.171249	0.254558	0.672729	1.18679	0.72058	1.95462	0.5011	0	A10BA Biguanides [DG:DG01684]	H	p6m	CAD	0.914
B01AC	B01AC	-0.154826	0.318922	-0.485467	0.856564	0.458439	1.60044	0.6273	0	B01AC Platelet aggregation inhibitors excl. heparin	H	p6m	CAD	0.914
B01AC	B01AC1:CAD1	0.467781	0.513011	0.911835	1.59645	0.584063	4.36365	0.3619	0	B01AC Platelet aggregation inhibitors excl. heparin	H	p6m	CAD	0.914
B01AC	CAD1	-0.0420943	0.33902	-0.124164	0.958779	0.493323	1.8634	0.9012	0	B01AC Platelet aggregation inhibitors excl. heparin	H	p6m	CAD	1
C07AB	C07AB1:CAD1	-0.558733	0.482674	-1.15758	0.571934	0.222062	1.47305	0.247	0	C07AB Beta blocking agents, selective	H	p6m	CAD	0.914
C07AB	C07AB	0.355884	0.273088	1.30319	1.42744	0.835787	2.43793	0.1925	0	C07AB Beta blocking agents, selective	H	p6m	CAD	0.914
C07AB	CAD1	0.319161	0.304238	1.04905	1.37597	0.757931	2.49798	0.2942	0	C07AB Beta blocking agents, selective	H	p6m	CAD	0.914
C08CA	C08CA1:CAD1	-1.04879	0.730386	-1.43594	0.350361	0.0837109	1.46639	0.151	0	C08CA Dihydropyridine derivatives [DG:DG01928]	H	p6m	CAD	0.914
C08CA	CAD1	0.296969	0.26111	1.13733	1.34577	0.806686	2.24512	0.2554	0	C08CA Dihydropyridine derivatives [DG:DG01928]	H	p6m	CAD	0.914
C08CA	C08CA	-0.0333372	0.257029	-0.129702	0.967212	0.584425	1.60072	0.8968	0	C08CA Dihydropyridine derivatives [DG:DG01928]	H	p6m	CAD	1
C09AA	C09AA	-0.532738	0.320077	-1.6644	0.586995	0.313453	1.09925	0.09604	0	C09AA ACE inhibitors, plain [DG:DG01501]	H	p6m	CAD	0.914
C09AA	CAD1	0.108141	0.281357	0.384354	1.1142	0.641893	1.93405	0.7007	0	C09AA ACE inhibitors, plain [DG:DG01501]	H	p6m	CAD	0.92
C09AA	C09AA1:CAD1	0.313816	0.537197	0.584173	1.36864	0.477535	3.92258	0.5591	0	C09AA ACE inhibitors, plain [DG:DG01501]	H	p6m	CAD	0.914
C09CA	C09CA1:CAD1	0.0964622	0.631264	0.152808	1.10127	0.319548	3.79534	0.8786	0	C09CA Angiotensin II receptor blockers, plain [DG:DG01495]	H	p6m	CAD	1
C09CA	C09CA	-0.183874	0.34055	-0.539931	0.832041	0.42683	1.62194	0.5892	0	C09CA Angiotensin II receptor blockers, plain [DG:DG01495]	H	p6m	CAD	0.914
C09CA	CAD1	0.136664	0.263851	0.517959	1.14644	0.683522	1.92288	0.6045	0	C09CA Angiotensin II receptor blockers, plain [DG:DG01495]	H	p6m	CAD	0.914
C10AA	C10AA1:CAD1	-0.191412	0.455794	-0.419954	0.825792	0.337972	2.01772	0.6745	0	C10AA HMG CoA reductase inhibitors [DG:DG01660]	H	p6m	CAD	0.914
C10AA	CAD1	0.292872	0.348626	0.840075	1.34027	0.67675	2.65434	0.4009	0	C10AA HMG CoA reductase inhibitors [DG:DG01660]	H	p6m	CAD	0.914
C10AA	C10AA	-0.217258	0.218764	-0.993112	0.804723	0.524114	1.23557	0.3207	0	C10AA HMG CoA reductase inhibitors [DG:DG01660]	H	p6m	CAD	0.914
G03CA	G03CA	-0.707402	0.940759	-0.751948	0.492923	0.0779773	3.11595	0.4521	0	G03CA Natural and semisynthetic estrogens, plain	H	p6m	CAD	0.914
G03CA	CAD1	0.158465	0.243976	0.649512	1.17171	0.726338	1.89018	0.516	0	G03CA Natural and semisynthetic estrogens, plain	H	p6m	CAD	0.914
G03CA	G03CA1:CAD1	-12.6138	819.192	-0.0153979	3.32568e-06	0	Inf	0.9877	0	G03CA Natural and semisynthetic estrogens, plain	H	p6m	CAD	1
G04CB	CAD1	0.110185	0.249263	0.442044	1.11648	0.684968	1.81985	0.6585	0	G04CB Testosterone-5-alpha reductase inhibitors	H	p6m	CAD	0.914
G04CB	G04CB1:CAD1	0.8768	1.18133	0.742211	2.4032	0.237241	24.3438	0.458	0	G04CB Testosterone-5-alpha reductase inhibitors	H	p6m	CAD	0.914
G04CB	G04CB	-1.2234	0.784076	-1.56031	0.294227	0.0632769	1.3681	0.1187	0	G04CB Testosterone-5-alpha reductase inhibitors	H	p6m	CAD	0.914
H03AA	CAD1	0.228682	0.25055	0.91272	1.25694	0.769197	2.05396	0.3614	0	H03AA Thyroid hormones	H	p6m	CAD	0.914
H03AA	H03AA1:CAD1	-0.894367	0.901723	-0.991842	0.408866	0.0698231	2.39422	0.3213	0	H03AA Thyroid hormones	H	p6m	CAD	0.914
H03AA	H03AA	0.401698	0.3329	1.20666	1.49436	0.778175	2.86967	0.2276	0	H03AA Thyroid hormones	H	p6m	CAD	0.914
R03BA	R03BA	-0.645609	0.973689	-0.663055	0.524343	0.077763	3.53556	0.5073	0	R03BA Glucocorticoids	H	p6m	CAD	0.914
R03BA	CAD1	0.161915	0.244036	0.66349	1.17576	0.728762	1.89693	0.507	0	R03BA Glucocorticoids	H	p6m	CAD	0.914
R03BA	R03BA1:CAD1	-12.8833	699.769	-0.0184108	2.54016e-06	0	Inf	0.9853	0	R03BA Glucocorticoids	H	p6m	CAD	1
A02BC	A02BC	-0.0856011	0.0916159	-0.934347	0.91796	0.767036	1.09858	0.35	0	A02BC Proton pump inhibitors [DG:DG01646]	A	p6m	dementia	0.647
A02BC	Dementia	0.830823	0.498545	1.6665	2.29521	0.863626	6.09984	0.0957	0	A02BC Proton pump inhibitors [DG:DG01646]	A	p6m	dementia	0.436
A02BC	A02BC1:Dementia	-0.96181	0.830694	-1.15784	0.3822	0.074986	1.94806	0.247	0	A02BC Proton pump inhibitors [DG:DG01646]	A	p6m	dementia	0.569
A03AA	A03AA	0.213029	0.424436	0.501911	1.23742	0.538422	2.84389	0.616	0	A03AA Synthetic anticholinergics, esters with tertiary amino group	A	p6m	dementia	0.815
A03AA	Dementia	0.495645	0.38982	1.27147	1.64156	0.764427	3.52514	0.204	0	A03AA Synthetic anticholinergics, esters with tertiary amino group	A	p6m	dementia	0.569
A03AA	A03AA1:Dementia									A03AA Synthetic anticholinergics, esters with tertiary amino group	A	p6m	dementia	NA
A10AE	A10AE	0.378993	0.585552	0.64724	1.46081	0.463462	4.60442	0.517	0	A10AE Insulins and analogues for injection, long-acting	A	p6m	dementia	0.726
A10AE	Dementia	0.39469	0.399323	0.988397	1.48392	0.678266	3.24656	0.323	0	A10AE Insulins and analogues for injection, long-acting	A	p6m	dementia	0.647
A10AE	A10AE1:Dementia	1.83424	2.54456	0.720845	6.26035	0.0426558	918.797	0.471	0	A10AE Insulins and analogues for injection, long-acting	A	p6m	dementia	0.713
A10BA	A10BA	-0.36628	0.192048	-1.90723	0.693309	0.475777	1.0103	0.0566	0	A10BA Biguanides [DG:DG01684]	A	p6m	dementia	0.317
A10BA	Dementia	0.493905	0.415414	1.18895	1.6387	0.725751	3.70009	0.234	0	A10BA Biguanides [DG:DG01684]	A	p6m	dementia	0.569
A10BA	A10BA1:Dementia	0.10567	1.22615	0.0861802	1.11146	0.100429	12.3006	0.931	0	A10BA Biguanides [DG:DG01684]	A	p6m	dementia	0.983
B01AC	B01AC	-0.225326	0.14155	-1.59185	0.798256	0.604807	1.05358	0.112	0	B01AC Platelet aggregation inhibitors excl. heparin	A	p6m	dementia	0.459
B01AC	Dementia	0.411447	0.452724	0.908827	1.509	0.621167	3.66581	0.363	0	B01AC Platelet aggregation inhibitors excl. heparin	A	p6m	dementia	0.647
B01AC	B01AC1:Dementia	0.363939	0.896308	0.406042	1.43899	0.248243	8.34136	0.685	0	B01AC Platelet aggregation inhibitors excl. heparin	A	p6m	dementia	0.878
C07AB	C07AB	-0.0318778	0.14086	-0.226308	0.968625	0.734882	1.27671	0.821	0	C07AB Beta blocking agents, selective	A	p6m	dementia	0.969
C07AB	Dementia	0.34176	0.424237	0.805587	1.40742	0.612631	3.23333	0.42	0	C07AB Beta blocking agents, selective	A	p6m	dementia	0.662
C07AB	C07AB1:Dementia	0.98351	1.15495	0.85156	2.67382	0.277796	25.7359	0.395	0	C07AB Beta blocking agents, selective	A	p6m	dementia	0.662
C08CA	C08CA	-0.23654	0.117479	-2.01346	0.789354	0.626963	0.993807	0.0441	1	C08CA Dihydropyridine derivatives [DG:DG01928]	A	p6m	dementia	0.317
C08CA	Dementia	0.460585	0.419332	1.09838	1.585	0.696596	3.60644	0.272	0	C08CA Dihydropyridine derivatives [DG:DG01928]	A	p6m	dementia	0.587
C08CA	C08CA1:Dementia	0.121971	1.14172	0.106831	1.12972	0.120457	10.5952	0.915	0	C08CA Dihydropyridine derivatives [DG:DG01928]	A	p6m	dementia	0.983
C09AA	C09AA	-0.378972	0.125494	-3.01985	0.684565	0.535255	0.875526	0.00255	1	C09AA ACE inhibitors, plain [DG:DG01501]	A	p6m	dementia	0.0523
C09AA	Dementia	0.587174	0.423996	1.38486	1.7989	0.783405	4.13073	0.166	0	C09AA ACE inhibitors, plain [DG:DG01501]	A	p6m	dementia	0.569
C09AA	C09AA1:Dementia	-0.786655	1.13111	-0.695469	0.455365	0.0495736	4.18283	0.487	0	C09AA ACE inhibitors, plain [DG:DG01501]	A	p6m	dementia	0.713
C09CA	C09CA	-0.294026	0.156567	-1.87795	0.745257	0.548269	1.01302	0.0605	0	C09CA Angiotensin II receptor blockers, plain [DG:DG01495]	A	p6m	dementia	0.317
C09CA	Dementia	0.383212	0.406802	0.94201	1.46699	0.660764	3.25692	0.346	0	C09CA Angiotensin II receptor blockers, plain [DG:DG01495]	A	p6m	dementia	0.647
C09CA	C09CA1:Dementia	1.29872	1.59994	0.811732	3.66462	0.15912	84.398	0.417	0	C09CA Angiotensin II receptor blockers, plain [DG:DG01495]	A	p6m	dementia	0.662
C10AA	C10AA	-0.584762	0.0961297	-6.08305	0.557239	0.461519	0.672811	1.29e-09	1	C10AA HMG CoA reductase inhibitors [DG:DG01660]	A	p6m	dementia	5.29e-08
C10AA	Dementia	-0.0914537	0.46027	-0.198696	0.912604	0.370149	2.25003	0.843	0	C10AA HMG CoA reductase inhibitors [DG:DG01660]	A	p6m	dementia	0.969
C10AA	C10AA1:Dementia	1.8665	0.988425	1.88835	6.4656	0.931096	44.8977	0.059	0	C10AA HMG CoA reductase inhibitors [DG:DG01660]	A	p6m	dementia	0.317
G03CA	G03CA	0.07607	0.220191	0.345472	1.07904	0.700729	1.66159	0.73	0	G03CA Natural and semisynthetic estrogens, plain	A	p6m	dementia	0.907
G03CA	Dementia	0.473476	0.39111	1.21059	1.60556	0.745777	3.45658	0.226	0	G03CA Natural and semisynthetic estrogens, plain	A	p6m	dementia	0.569
G03CA	G03CA1:Dementia	10.4948	200.418	0.0523647	36128.1	8.09018e-167	1.61336e+175	0.958	0	G03CA Natural and semisynthetic estrogens, plain	A	p6m	dementia	0.983
G04CB	G04CB	-0.201881	0.322417	-0.626149	0.817192	0.434305	1.53763	0.531	0	G04CB Testosterone-5-alpha reductase inhibitors	A	p6m	dementia	0.726
G04CB	Dementia	0.492238	0.394085	1.24906	1.63597	0.755482	3.54265	0.212	0	G04CB Testosterone-5-alpha reductase inhibitors	A	p6m	dementia	0.569
G04CB	G04CB1:Dementia	-0.0457275	2.69125	-0.0169912	0.955302	0.00488227	186.922	0.986	0	G04CB Testosterone-5-alpha reductase inhibitors	A	p6m	dementia	0.986
H03AA	H03AA	-0.304457	0.162949	-1.86842	0.737524	0.535834	1.01513	0.0618	0	H03AA Thyroid hormones	A	p6m	dementia	0.317
H03AA	Dementia	0.478158	0.415206	1.15162	1.6131	0.714704	3.6408	0.25	0	H03AA Thyroid hormones	A	p6m	dementia	0.569
H03AA	H03AA1:Dementia	0.225131	1.19595	0.188245	1.25249	0.120077	13.0643	0.851	0	H03AA Thyroid hormones	A	p6m	dementia	0.969
R03BA	R03BA	-0.600227	0.254769	-2.35597	0.548687	0.332964	0.904176	0.0185	1	R03BA Glucocorticoids	A	p6m	dementia	0.253
R03BA	Dementia	0.532426	0.396703	1.34212	1.70306	0.782435	3.7069	0.18	0	R03BA Glucocorticoids	A	p6m	dementia	0.569
R03BA	R03BA1:Dementia	-10.9538	211.371	-0.0518226	1.74911e-05	1.8467e-185	1.65668e+175	0.959	0	R03BA Glucocorticoids	A	p6m	dementia	0.983
A02BC	A02BC	0.31095	0.212921	1.4604	1.36472	0.898976	2.07176	0.144	0	A02BC Proton pump inhibitors [DG:DG01646]	B	p6m	dementia	0.319
A02BC	Dementia	1.84796	0.512254	3.60751	6.34688	2.32483	17.3272	0.000313	-1	A02BC Proton pump inhibitors [DG:DG01646]	B	p6m	dementia	0.00295
A02BC	A02BC1:Dementia	-0.746339	0.942916	-0.791523	0.474099	0.0746456	3.01116	0.429	0	A02BC Proton pump inhibitors [DG:DG01646]	B	p6m	dementia	0.651
A03AA	A03AA	-14.1979	696.08	-0.020397	6.82212e-07	0	Inf	0.984	0	A03AA Synthetic anticholinergics, esters with tertiary amino group	B	p6m	dementia	0.998
A03AA	Dementia	1.59428	0.429613	3.71097	4.92479	2.12122	11.4338	0.000209	-1	A03AA Synthetic anticholinergics, esters with tertiary amino group	B	p6m	dementia	0.00291
A03AA	A03AA1:Dementia									A03AA Synthetic anticholinergics, esters with tertiary amino group	B	p6m	dementia	NA
A10AE	A10AE	0.754486	0.933899	0.807889	2.12652	0.340786	13.2696	0.419	0	A10AE Insulins and analogues for injection, long-acting	B	p6m	dementia	0.651
A10AE	Dementia	1.44715	0.452287	3.19963	4.25098	1.75138	10.318	0.00139	-1	A10AE Insulins and analogues for injection, long-acting	B	p6m	dementia	0.0057
A10AE	A10AE1:Dementia	2.12718	2.66461	0.798306	8.39116	0.0451836	1558.34	0.425	0	A10AE Insulins and analogues for injection, long-acting	B	p6m	dementia	0.651
A10BA	A10BA	-0.388425	0.454242	-0.855107	0.678124	0.278314	1.65228	0.393	0	A10BA Biguanides [DG:DG01684]	B	p6m	dementia	0.651
A10BA	Dementia	1.52256	0.456157	3.3378	4.58395	1.87429	11.211	0.000852	-1	A10BA Biguanides [DG:DG01684]	B	p6m	dementia	0.00437
A10BA	A10BA1:Dementia	0.855988	1.35486	0.63179	2.3537	0.165244	33.5255	0.528	0	A10BA Biguanides [DG:DG01684]	B	p6m	dementia	0.746
B01AC	B01AC	-0.0849511	0.278649	-0.304867	0.918557	0.531918	1.58624	0.76	0	B01AC Platelet aggregation inhibitors excl. heparin	B	p6m	dementia	0.89
B01AC	Dementia	1.16366	0.527652	2.20536	3.20163	1.13787	9.00848	0.0275	-1	B01AC Platelet aggregation inhibitors excl. heparin	B	p6m	dementia	0.0805
B01AC	B01AC1:Dementia	1.54495	0.973364	1.58723	4.68774	0.695301	31.6048	0.113	0	B01AC Platelet aggregation inhibitors excl. heparin	B	p6m	dementia	0.273
C07AB	C07AB	0.490607	0.264768	1.85297	1.63331	0.97191	2.74479	0.064	0	C07AB Beta blocking agents, selective	B	p6m	dementia	0.175
C07AB	Dementia	1.31149	0.494496	2.65218	3.71171	1.40775	9.78638	0.00803	-1	C07AB Beta blocking agents, selective	B	p6m	dementia	0.0274
C07AB	C07AB1:Dementia	1.73626	1.19949	1.4475	5.6761	0.540403	59.6186	0.148	0	C07AB Beta blocking agents, selective	B	p6m	dementia	0.319
C08CA	C08CA	-0.0663863	0.260407	-0.254932	0.935769	0.561616	1.55919	0.799	0	C08CA Dihydropyridine derivatives [DG:DG01928]	B	p6m	dementia	0.91
C08CA	Dementia	1.53456	0.459462	3.33991	4.6393	1.88466	11.4201	0.000846	-1	C08CA Dihydropyridine derivatives [DG:DG01928]	B	p6m	dementia	0.00437
C08CA	C08CA1:Dementia	0.533347	1.28414	0.415334	1.70463	0.137475	21.1367	0.678	0	C08CA Dihydropyridine derivatives [DG:DG01928]	B	p6m	dementia	0.842
C09AA	C09AA	-0.0957904	0.280665	-0.341298	0.908654	0.524108	1.57535	0.733	0	C09AA ACE inhibitors, plain [DG:DG01501]	B	p6m	dementia	0.884
C09AA	Dementia	1.60861	0.457674	3.51474	4.99584	2.03663	12.2548	0.000445	-1	C09AA ACE inhibitors, plain [DG:DG01501]	B	p6m	dementia	0.00304
C09AA	C09AA1:Dementia	-0.0854465	1.31916	-0.0647735	0.918102	0.0691301	12.1931	0.948	0	C09AA ACE inhibitors, plain [DG:DG01501]	B	p6m	dementia	0.998
C09CA	C09CA	-0.0271507	0.3291	-0.0824998	0.973215	0.510492	1.85536	0.934	0	C09CA Angiotensin II receptor blockers, plain [DG:DG01495]	B	p6m	dementia	0.998
C09CA	Dementia	1.39939	0.460861	3.03646	4.05271	1.64186	10.0036	0.00241	-1	C09CA Angiotensin II receptor blockers, plain [DG:DG01495]	B	p6m	dementia	0.00898
C09CA	C09CA1:Dementia	2.30273	1.73825	1.32474	10.0014	0.331128	302.083	0.185	0	C09CA Angiotensin II receptor blockers, plain [DG:DG01495]	B	p6m	dementia	0.361
C10AA	C10AA	-0.158058	0.211699	-0.746613	0.853801	0.563768	1.29304	0.455	0	C10AA HMG CoA reductase inhibitors [DG:DG01660]	B	p6m	dementia	0.666
C10AA	Dementia	0.91525	0.553986	1.65212	2.4974	0.842918	7.3993	0.0986	0	C10AA HMG CoA reductase inhibitors [DG:DG01660]	B	p6m	dementia	0.253
C10AA	C10AA1:Dementia	2.15125	0.96272	2.23455	8.59556	1.30181	56.7546	0.0255	-1	C10AA HMG CoA reductase inhibitors [DG:DG01660]	B	p6m	dementia	0.0804
G03CA	G03CA	-0.44742	0.966193	-0.463075	0.639276	0.0961619	4.24984	0.643	0	G03CA Natural and semisynthetic estrogens, plain	B	p6m	dementia	0.824
G03CA	Dementia	1.60966	0.430763	3.73677	5.00111	2.14924	11.6372	0.000189	-1	G03CA Natural and semisynthetic estrogens, plain	B	p6m	dementia	0.00291
G03CA	G03CA1:Dementia	-16.11	6636.78	-0.00242739	1.00809e-07	0	Inf	0.998	0	G03CA Natural and semisynthetic estrogens, plain	B	p6m	dementia	0.998
G04CB	G04CB	-0.847396	0.668092	-1.26838	0.428529	0.115643	1.58797	0.205	0	G04CB Testosterone-5-alpha reductase inhibitors	B	p6m	dementia	0.382
G04CB	Dementia	1.56106	0.437149	3.571	4.76387	2.02181	11.2248	0.00036	-1	G04CB Testosterone-5-alpha reductase inhibitors	B	p6m	dementia	0.00295
G04CB	G04CB1:Dementia	1.31545	2.66824	0.493002	3.72642	0.0199233	696.982	0.622	0	G04CB Testosterone-5-alpha reductase inhibitors	B	p6m	dementia	0.823
H03AA	H03AA	0.492768	0.357072	1.38002	1.63684	0.812775	3.29642	0.168	0	H03AA Thyroid hormones	B	p6m	dementia	0.344
H03AA	Dementia	1.49666	0.463897	3.22628	4.46675	1.79886	11.0914	0.00127	-1	H03AA Thyroid hormones	B	p6m	dementia	0.0057
H03AA	H03AA1:Dementia	0.791373	1.3493	0.586507	2.20642	0.156604	31.0868	0.558	0	H03AA Thyroid hormones	B	p6m	dementia	0.763
R03BA	R03BA	-1.1226	0.997015	-1.12596	0.325433	0.0460822	2.29821	0.26	0	R03BA Glucocorticoids	B	p6m	dementia	0.463
R03BA	Dementia	1.59762	0.431048	3.70636	4.94125	2.12233	11.5043	0.000213	-1	R03BA Glucocorticoids	B	p6m	dementia	0.00291
R03BA	R03BA1:Dementia	-14.2988	4068.26	-0.00351472	6.16769e-07	0	Inf	0.997	0	R03BA Glucocorticoids	B	p6m	dementia	0.998
A02BC	A02BC	0.294747	0.0727739	4.05017	1.34279	1.16429	1.54865	5.12e-05	-1	A02BC Proton pump inhibitors [DG:DG01646]	C	p6m	dementia	0.000143
A02BC	Dementia	2.12253	0.286525	7.40783	8.35221	4.76333	14.6451	1.29e-13	-1	A02BC Proton pump inhibitors [DG:DG01646]	C	p6m	dementia	5.42e-12
A02BC	A02BC1:Dementia	-0.971392	0.56139	-1.73033	0.378556	0.125972	1.13759	0.0836	0	A02BC Proton pump inhibitors [DG:DG01646]	C	p6m	dementia	0.195
A03AA	A03AA	0.3483	0.316854	1.09924	1.41666	0.761302	2.63617	0.272	0	A03AA Synthetic anticholinergics, esters with tertiary amino group	C	p6m	dementia	0.519
A03AA	Dementia	1.8034	0.248499	7.25716	6.07024	3.72977	9.87937	3.96e-13	-1	A03AA Synthetic anticholinergics, esters with tertiary amino group	C	p6m	dementia	5.59e-12
A03AA	A03AA1:Dementia	-9.34528	122.675	-0.0761793	8.73767e-05	3.31219e-109	2.30503e+100	0.939	0	A03AA Synthetic anticholinergics, esters with tertiary amino group	C	p6m	dementia	0.977
A10AE	A10AE	0.0477718	0.340083	0.140471	1.04893	0.5386	2.04281	0.888	0	A10AE Insulins and analogues for injection, long-acting	C	p6m	dementia	0.977
A10AE	Dementia	1.72843	0.260661	6.63094	5.63178	3.37886	9.38688	3.34e-11	-1	A10AE Insulins and analogues for injection, long-acting	C	p6m	dementia	1.28e-10
A10AE	A10AE1:Dementia	0.910754	0.915094	0.995257	2.4862	0.413622	14.944	0.32	0	A10AE Insulins and analogues for injection, long-acting	C	p6m	dementia	0.584
A10BA	A10BA	-0.0797104	0.141246	-0.564338	0.923384	0.700089	1.2179	0.573	0	A10BA Biguanides [DG:DG01684]	C	p6m	dementia	0.865
A10BA	Dementia	1.78129	0.263447	6.76149	5.93752	3.5429	9.95066	1.37e-11	-1	A10BA Biguanides [DG:DG01684]	C	p6m	dementia	7.65e-11
A10BA	A10BA1:Dementia	0.0221939	0.772285	0.028738	1.02244	0.225044	4.64526	0.977	0	A10BA Biguanides [DG:DG01684]	C	p6m	dementia	0.977
B01AC	B01AC	0.0866754	0.106829	0.811348	1.09054	0.884524	1.34455	0.417	0	B01AC Platelet aggregation inhibitors excl. heparin	C	p6m	dementia	0.701
B01AC	Dementia	1.81302	0.291487	6.2199	6.12892	3.46154	10.8517	4.98e-10	-1	B01AC Platelet aggregation inhibitors excl. heparin	C	p6m	dementia	1.74e-09
B01AC	B01AC1:Dementia	-0.101789	0.549833	-0.185128	0.90322	0.307449	2.65347	0.853	0	B01AC Platelet aggregation inhibitors excl. heparin	C	p6m	dementia	0.977
C07AB	C07AB	0.0236682	0.107799	0.219559	1.02395	0.828934	1.26485	0.826	0	C07AB Beta blocking agents, selective	C	p6m	dementia	0.977
C07AB	Dementia	1.73412	0.279796	6.1978	5.66393	3.27306	9.80124	5.73e-10	-1	C07AB Beta blocking agents, selective	C	p6m	dementia	1.85e-09
C07AB	C07AB1:Dementia	0.281861	0.599971	0.469791	1.32559	0.40899	4.29643	0.638	0	C07AB Beta blocking agents, selective	C	p6m	dementia	0.923
C08CA	C08CA	-0.0511324	0.0916418	-0.55796	0.950153	0.79394	1.1371	0.577	0	C08CA Dihydropyridine derivatives [DG:DG01928]	C	p6m	dementia	0.865
C08CA	Dementia	1.83056	0.267659	6.83917	6.2374	3.69123	10.5399	7.98e-12	-1	C08CA Dihydropyridine derivatives [DG:DG01928]	C	p6m	dementia	5.59e-11
C08CA	C08CA1:Dementia	-0.289461	0.704598	-0.410818	0.748667	0.188162	2.97883	0.681	0	C08CA Dihydropyridine derivatives [DG:DG01928]	C	p6m	dementia	0.923
C09AA	C09AA	-0.289731	0.0992551	-2.91905	0.748465	0.616148	0.909197	0.00351	1	C09AA ACE inhibitors, plain [DG:DG01501]	C	p6m	dementia	0.00867
C09AA	Dementia	1.76234	0.261652	6.73544	5.82607	3.48864	9.7296	1.64e-11	-1	C09AA ACE inhibitors, plain [DG:DG01501]	C	p6m	dementia	7.65e-11
C09AA	C09AA1:Dementia	-0.0538322	0.818611	-0.0657604	0.947591	0.190465	4.7144	0.948	0	C09AA ACE inhibitors, plain [DG:DG01501]	C	p6m	dementia	0.977
C09CA	C09CA	-0.136645	0.121548	-1.1242	0.87228	0.687375	1.10693	0.261	0	C09CA Angiotensin II receptor blockers, plain [DG:DG01495]	C	p6m	dementia	0.519
C09CA	Dementia	1.775	0.263453	6.73745	5.90027	3.52063	9.88835	1.61e-11	-1	C09CA Angiotensin II receptor blockers, plain [DG:DG01495]	C	p6m	dementia	7.65e-11
C09CA	C09CA1:Dementia	0.0809143	0.777211	0.104109	1.08428	0.236361	4.974	0.917	0	C09CA Angiotensin II receptor blockers, plain [DG:DG01495]	C	p6m	dementia	0.977
C10AA	C10AA	-0.243872	0.0747294	-3.2634	0.783588	0.676827	0.907189	0.0011	1	C10AA HMG CoA reductase inhibitors [DG:DG01660]	C	p6m	dementia	0.00289
C10AA	Dementia	1.75805	0.31628	5.55852	5.80112	3.12099	10.7828	2.72e-08	-1	C10AA HMG CoA reductase inhibitors [DG:DG01660]	C	p6m	dementia	8.16e-08
C10AA	C10AA1:Dementia	0.0207418	0.504084	0.0411475	1.02096	0.380128	2.74212	0.967	0	C10AA HMG CoA reductase inhibitors [DG:DG01660]	C	p6m	dementia	0.977
G03CA	G03CA	0.27873	0.1836	1.51814	1.32145	0.922083	1.89379	0.129	0	G03CA Natural and semisynthetic estrogens, plain	C	p6m	dementia	0.271
G03CA	Dementia	1.7822	0.250308	7.12004	5.94291	3.63862	9.70648	1.08e-12	-1	G03CA Natural and semisynthetic estrogens, plain	C	p6m	dementia	9.07e-12
G03CA	G03CA1:Dementia	0.86652	2.03081	0.426687	2.37862	0.0444317	127.338	0.67	0	G03CA Natural and semisynthetic estrogens, plain	C	p6m	dementia	0.923
G04CB	G04CB	-0.150526	0.233991	-0.643298	0.860255	0.543817	1.36082	0.52	0	G04CB Testosterone-5-alpha reductase inhibitors	C	p6m	dementia	0.84
G04CB	Dementia	1.79389	0.251828	7.12346	6.01279	3.67045	9.84994	1.05e-12	-1	G04CB Testosterone-5-alpha reductase inhibitors	C	p6m	dementia	9.07e-12
G04CB	G04CB1:Dementia	-0.237572	1.52044	-0.156252	0.78854	0.0400511	15.525	0.876	0	G04CB Testosterone-5-alpha reductase inhibitors	C	p6m	dementia	0.977
H03AA	H03AA	-0.203147	0.132623	-1.53177	0.816158	0.62934	1.05843	0.126	0	H03AA Thyroid hormones	C	p6m	dementia	0.271
H03AA	Dementia	1.76657	0.263567	6.70256	5.85076	3.4903	9.80757	2.05e-11	-1	H03AA Thyroid hormones	C	p6m	dementia	8.61e-11
H03AA	H03AA1:Dementia	0.224526	0.770482	0.29141	1.25173	0.276486	5.66693	0.771	0	H03AA Thyroid hormones	C	p6m	dementia	0.977
R03BA	R03BA	0.194192	0.21021	0.9238	1.21433	0.804276	1.83344	0.356	0	R03BA Glucocorticoids	C	p6m	dementia	0.623
R03BA	Dementia	1.80384	0.248591	7.25624	6.07292	3.73074	9.88552	3.99e-13	-1	R03BA Glucocorticoids	C	p6m	dementia	5.59e-12
R03BA	R03BA1:Dementia	-9.05719	115.575	-0.0783667	0.000116549	4.88577e-103	2.78028e+94	0.938	0	R03BA Glucocorticoids	C	p6m	dementia	0.977
A02BC	A02BC	0.547041	0.200974	2.72195	1.72813	1.16549	2.5624	0.00649	-1	A02BC Proton pump inhibitors [DG:DG01646]	D	p6m	dementia	0.0182
A02BC	Dementia	3.28224	0.390372	8.40798	26.6353	12.3928	57.2457	4.18e-17	-1	A02BC Proton pump inhibitors [DG:DG01646]	D	p6m	dementia	1.11e-15
A02BC	A02BC1:Dementia	-1.25496	0.743103	-1.68881	0.285088	0.0664427	1.22324	0.0913	0	A02BC Proton pump inhibitors [DG:DG01646]	D	p6m	dementia	0.24
A03AA	A03AA	-13.5056	589.341	-0.0229165	1.36329e-06	0	Inf	0.982	0	A03AA Synthetic anticholinergics, esters with tertiary amino group	D	p6m	dementia	1
A03AA	Dementia	2.8285	0.340199	8.31424	16.92	8.68603	32.9594	9.26e-17	-1	A03AA Synthetic anticholinergics, esters with tertiary amino group	D	p6m	dementia	1.11e-15
A03AA	A03AA1:Dementia	-4.23301	11123.8	-0.000380537	0.0145086	0	Inf	1	0	A03AA Synthetic anticholinergics, esters with tertiary amino group	D	p6m	dementia	1
A10AE	A10AE	0.612988	0.789323	0.776599	1.84594	0.392954	8.67146	0.437	0	A10AE Insulins and analogues for injection, long-acting	D	p6m	dementia	0.718
A10AE	Dementia	2.71133	0.365372	7.42075	15.0493	7.35378	30.798	1.17e-13	-1	A10AE Insulins and analogues for injection, long-acting	D	p6m	dementia	5.46e-13
A10AE	A10AE1:Dementia	1.00091	1.18475	0.844824	2.72075	0.266822	27.7431	0.398	0	A10AE Insulins and analogues for injection, long-acting	D	p6m	dementia	0.718
A10BA	A10BA	-0.309137	0.413321	-0.747935	0.73408	0.32653	1.6503	0.455	0	A10BA Biguanides [DG:DG01684]	D	p6m	dementia	0.718
A10BA	Dementia	2.74242	0.36221	7.57136	15.5245	7.63316	31.5743	3.7e-14	-1	A10BA Biguanides [DG:DG01684]	D	p6m	dementia	1.94e-13
A10BA	A10BA1:Dementia	0.683395	1.01609	0.672575	1.98059	0.270331	14.5109	0.501	0	A10BA Biguanides [DG:DG01684]	D	p6m	dementia	0.718
B01AC	B01AC	0.165487	0.256956	0.644028	1.17997	0.713096	1.95251	0.52	0	B01AC Platelet aggregation inhibitors excl. heparin	D	p6m	dementia	0.718
B01AC	Dementia	2.64681	0.435999	6.07067	14.1089	6.00302	33.1602	1.28e-09	-1	B01AC Platelet aggregation inhibitors excl. heparin	D	p6m	dementia	4.14e-09
B01AC	B01AC1:Dementia	0.494936	0.685432	0.722078	1.64039	0.42806	6.28624	0.47	0	B01AC Platelet aggregation inhibitors excl. heparin	D	p6m	dementia	0.718
C07AB	C07AB	0.361948	0.24503	1.47716	1.43612	0.888426	2.32147	0.14	0	C07AB Beta blocking agents, selective	D	p6m	dementia	0.346
C07AB	Dementia	2.70821	0.410765	6.59308	15.0024	6.7068	33.5587	4.31e-11	-1	C07AB Beta blocking agents, selective	D	p6m	dementia	1.51e-10
C07AB	C07AB1:Dementia	0.532264	0.703917	0.756146	1.70278	0.428531	6.76606	0.45	0	C07AB Beta blocking agents, selective	D	p6m	dementia	0.718
C08CA	C08CA	-0.0697659	0.242459	-0.287743	0.932612	0.579854	1.49997	0.773	0	C08CA Dihydropyridine derivatives [DG:DG01928]	D	p6m	dementia	0.906
C08CA	Dementia	2.91617	0.361786	8.06049	18.4704	9.08914	37.5344	7.62e-16	-1	C08CA Dihydropyridine derivatives [DG:DG01928]	D	p6m	dementia	6.19e-15
C08CA	C08CA1:Dementia	-0.623179	0.984949	-0.632702	0.536237	0.0777973	3.69615	0.527	0	C08CA Dihydropyridine derivatives [DG:DG01928]	D	p6m	dementia	0.718
C09AA	C09AA	-0.33996	0.261782	-1.29864	0.711799	0.426116	1.18901	0.194	0	C09AA ACE inhibitors, plain [DG:DG01501]	D	p6m	dementia	0.453
C09AA	Dementia	2.78557	0.360018	7.73731	16.2091	8.00404	32.8252	1.02e-14	-1	C09AA ACE inhibitors, plain [DG:DG01501]	D	p6m	dementia	6.12e-14
C09AA	C09AA1:Dementia	-0.0286823	1.07723	-0.0266259	0.971725	0.117651	8.02583	0.979	0	C09AA ACE inhibitors, plain [DG:DG01501]	D	p6m	dementia	1
C09CA	C09CA	-0.078036	0.304868	-0.255966	0.924931	0.508867	1.68118	0.798	0	C09CA Angiotensin II receptor blockers, plain [DG:DG01495]	D	p6m	dementia	0.906
C09CA	Dementia	2.71185	0.373323	7.26408	15.0571	7.2438	31.2979	3.76e-13	-1	C09CA Angiotensin II receptor blockers, plain [DG:DG01495]	D	p6m	dementia	1.44e-12
C09CA	C09CA1:Dementia	0.815256	0.868781	0.938391	2.25975	0.411672	12.4043	0.348	0	C09CA Angiotensin II receptor blockers, plain [DG:DG01495]	D	p6m	dementia	0.696
C10AA	C10AA	-0.154714	0.200344	-0.77224	0.85666	0.578462	1.26865	0.44	0	C10AA HMG CoA reductase inhibitors [DG:DG01660]	D	p6m	dementia	0.718
C10AA	Dementia	2.62475	0.467653	5.61261	13.8012	5.51885	34.5131	1.99e-08	-1	C10AA HMG CoA reductase inhibitors [DG:DG01660]	D	p6m	dementia	5.97e-08
C10AA	C10AA1:Dementia	0.412216	0.65601	0.628369	1.51016	0.41747	5.46288	0.53	0	C10AA HMG CoA reductase inhibitors [DG:DG01660]	D	p6m	dementia	0.718
G03CA	G03CA	-0.254681	0.938029	-0.271507	0.775164	0.123293	4.87357	0.786	0	G03CA Natural and semisynthetic estrogens, plain	D	p6m	dementia	0.906
G03CA	Dementia	2.82619	0.340009	8.31209	16.8809	8.66921	32.8711	9.43e-17	-1	G03CA Natural and semisynthetic estrogens, plain	D	p6m	dementia	1.11e-15
G03CA	G03CA1:Dementia	-15.6404	7905.8	-0.00197834	1.61242e-07	0	Inf	0.998	0	G03CA Natural and semisynthetic estrogens, plain	D	p6m	dementia	1
G04CB	G04CB	-0.671002	0.629476	-1.06597	0.511196	0.148859	1.7555	0.286	0	G04CB Testosterone-5-alpha reductase inhibitors	D	p6m	dementia	0.632
G04CB	Dementia	2.79563	0.347616	8.0423	16.3729	8.28389	32.3607	8.84e-16	-1	G04CB Testosterone-5-alpha reductase inhibitors	D	p6m	dementia	6.19e-15
G04CB	G04CB1:Dementia	0.633643	1.64358	0.385526	1.88446	0.0751912	47.2289	0.7	0	G04CB Testosterone-5-alpha reductase inhibitors	D	p6m	dementia	0.865
H03AA	H03AA	0.336168	0.329348	1.02071	1.39957	0.733928	2.66894	0.307	0	H03AA Thyroid hormones	D	p6m	dementia	0.645
H03AA	Dementia	2.75312	0.372132	7.39823	15.6915	7.56665	32.5404	1.38e-13	-1	H03AA Thyroid hormones	D	p6m	dementia	5.8e-13
H03AA	H03AA1:Dementia	0.44221	0.867355	0.509837	1.55614	0.284284	8.51816	0.61	0	H03AA Thyroid hormones	D	p6m	dementia	0.801
R03BA	R03BA	-0.376581	0.972512	-0.387225	0.686204	0.102011	4.61593	0.699	0	R03BA Glucocorticoids	D	p6m	dementia	0.865
R03BA	Dementia	2.82314	0.340199	8.29848	16.8296	8.63959	32.7832	1.06e-16	-1	R03BA Glucocorticoids	D	p6m	dementia	1.11e-15
R03BA	R03BA1:Dementia	-15.0023	6304.94	-0.00237945	3.05194e-07	0	Inf	0.998	0	R03BA Glucocorticoids	D	p6m	dementia	1
A02BC	A02BC	0.38357	0.0415492	9.2317	1.46751	1.35274	1.59202	2.68e-20	-1	A02BC Proton pump inhibitors [DG:DG01646]	E	p6m	dementia	1.13e-18
A02BC	Dementia	1.85066	0.233623	7.92159	6.36403	4.02598	10.0599	2.35e-15	-1	A02BC Proton pump inhibitors [DG:DG01646]	E	p6m	dementia	7.05e-15
A02BC	A02BC1:Dementia	-0.470989	0.396723	-1.1872	0.624385	0.286919	1.35877	0.235	0	A02BC Proton pump inhibitors [DG:DG01646]	E	p6m	dementia	0.366
A03AA	A03AA	0.25334	0.199695	1.26864	1.28832	0.87105	1.90548	0.205	0	A03AA Synthetic anticholinergics, esters with tertiary amino group	E	p6m	dementia	0.344
A03AA	Dementia	1.69289	0.18992	8.91371	5.43518	3.74587	7.88632	4.95e-19	-1	A03AA Synthetic anticholinergics, esters with tertiary amino group	E	p6m	dementia	1.04e-17
A03AA	A03AA1:Dementia	-8.34699	75.6803	-0.110293	0.000237109	9.02688e-69	6.22813e+60	0.912	0	A03AA Synthetic anticholinergics, esters with tertiary amino group	E	p6m	dementia	0.934
A10AE	A10AE	-0.321779	0.2686	-1.19798	0.724858	0.428173	1.22712	0.231	0	A10AE Insulins and analogues for injection, long-acting	E	p6m	dementia	0.366
A10AE	Dementia	1.63793	0.195886	8.36166	5.1445	3.50433	7.55235	6.2e-17	-1	A10AE Insulins and analogues for injection, long-acting	E	p6m	dementia	2.89e-16
A10AE	A10AE1:Dementia	1.32232	0.839865	1.57445	3.75213	0.723404	19.4614	0.115	0	A10AE Insulins and analogues for injection, long-acting	E	p6m	dementia	0.214
A10BA	A10BA	0.117081	0.0873382	1.34055	1.12421	0.947338	1.33411	0.18	0	A10BA Biguanides [DG:DG01684]	E	p6m	dementia	0.315
A10BA	Dementia	1.6546	0.201793	8.19949	5.23099	3.52222	7.76875	2.42e-16	-1	A10BA Biguanides [DG:DG01684]	E	p6m	dementia	9.24e-16
A10BA	A10BA1:Dementia	0.315811	0.590899	0.534458	1.37137	0.430704	4.36647	0.593	0	A10BA Biguanides [DG:DG01684]	E	p6m	dementia	0.803
B01AC	B01AC	0.250527	0.0663294	3.77701	1.2847	1.12809	1.46306	0.000159	-1	B01AC Platelet aggregation inhibitors excl. heparin	E	p6m	dementia	0.000393
B01AC	Dementia	1.70268	0.220564	7.71967	5.48863	3.56221	8.45685	1.17e-14	-1	B01AC Platelet aggregation inhibitors excl. heparin	E	p6m	dementia	3.28e-14
B01AC	B01AC1:Dementia	-0.12291	0.430018	-0.285825	0.884343	0.380704	2.05426	0.775	0	B01AC Platelet aggregation inhibitors excl. heparin	E	p6m	dementia	0.902
C07AB	C07AB	0.115844	0.0672947	1.72144	1.12282	0.984076	1.28113	0.0852	0	C07AB Beta blocking agents, selective	E	p6m	dementia	0.17
C07AB	Dementia	1.67213	0.207822	8.04596	5.3235	3.54241	8.00013	8.58e-16	-1	C07AB Beta blocking agents, selective	E	p6m	dementia	2.77e-15
C07AB	C07AB1:Dementia	0.0931095	0.505465	0.184206	1.09758	0.407552	2.95591	0.854	0	C07AB Beta blocking agents, selective	E	p6m	dementia	0.92
C08CA	C08CA	0.117757	0.0533018	2.20925	1.12497	1.01338	1.24886	0.0272	-1	C08CA Dihydropyridine derivatives [DG:DG01928]	E	p6m	dementia	0.0601
C08CA	Dementia	1.74067	0.204167	8.5257	5.70114	3.82097	8.50648	1.52e-17	-1	C08CA Dihydropyridine derivatives [DG:DG01928]	E	p6m	dementia	8.29e-17
C08CA	C08CA1:Dementia	-0.346141	0.549217	-0.630245	0.707413	0.241089	2.07572	0.528	0	C08CA Dihydropyridine derivatives [DG:DG01928]	E	p6m	dementia	0.765
C09AA	C09AA	-0.0213492	0.0560044	-0.381205	0.978877	0.877116	1.09244	0.703	0	C09AA ACE inhibitors, plain [DG:DG01501]	E	p6m	dementia	0.868
C09AA	Dementia	1.64537	0.20395	8.06751	5.18294	3.47514	7.73	7.19e-16	-1	C09AA ACE inhibitors, plain [DG:DG01501]	E	p6m	dementia	2.52e-15
C09AA	C09AA1:Dementia	0.295308	0.551999	0.53498	1.34354	0.455394	3.96383	0.593	0	C09AA ACE inhibitors, plain [DG:DG01501]	E	p6m	dementia	0.803
C09CA	C09CA	0.0691324	0.0709223	0.974762	1.07158	0.932512	1.23138	0.33	0	C09CA Angiotensin II receptor blockers, plain [DG:DG01495]	E	p6m	dementia	0.495
C09CA	Dementia	1.70987	0.198496	8.61412	5.52823	3.7465	8.1573	7.07e-18	-1	C09CA Angiotensin II receptor blockers, plain [DG:DG01495]	E	p6m	dementia	4.95e-17
C09CA	C09CA1:Dementia	-0.268991	0.672802	-0.399807	0.76415	0.204403	2.85674	0.689	0	C09CA Angiotensin II receptor blockers, plain [DG:DG01495]	E	p6m	dementia	0.868
C10AA	C10AA	0.138394	0.0422161	3.27823	1.14843	1.05723	1.24749	0.00104	-1	C10AA HMG CoA reductase inhibitors [DG:DG01660]	E	p6m	dementia	0.00243
C10AA	Dementia	1.92308	0.225668	8.52173	6.84201	4.39637	10.6481	1.58e-17	-1	C10AA HMG CoA reductase inhibitors [DG:DG01660]	E	p6m	dementia	8.29e-17
C10AA	C10AA1:Dementia	-0.649289	0.414361	-1.56697	0.522417	0.231906	1.17685	0.117	0	C10AA HMG CoA reductase inhibitors [DG:DG01660]	E	p6m	dementia	0.214
G03CA	G03CA	0.201098	0.0936595	2.14712	1.22274	1.01768	1.46913	0.0318	-1	G03CA Natural and semisynthetic estrogens, plain	E	p6m	dementia	0.0668
G03CA	Dementia	1.68274	0.190702	8.8239	5.38027	3.70235	7.81864	1.11e-18	-1	G03CA Natural and semisynthetic estrogens, plain	E	p6m	dementia	1.43e-17
G03CA	G03CA1:Dementia	0.470513	2.01923	0.233015	1.60081	0.0305887	83.7764	0.816	0	G03CA Natural and semisynthetic estrogens, plain	E	p6m	dementia	0.902
G04CB	G04CB	-0.0604218	0.153568	-0.393453	0.941367	0.696693	1.27197	0.694	0	G04CB Testosterone-5-alpha reductase inhibitors	E	p6m	dementia	0.868
G04CB	Dementia	1.68712	0.19224	8.77612	5.40389	3.70742	7.87666	1.7e-18	-1	G04CB Testosterone-5-alpha reductase inhibitors	E	p6m	dementia	1.43e-17
G04CB	G04CB1:Dementia	-0.164213	1.21365	-0.135305	0.848562	0.0786355	9.15689	0.892	0	G04CB Testosterone-5-alpha reductase inhibitors	E	p6m	dementia	0.934
H03AA	H03AA	0.0167388	0.0690112	0.242552	1.01688	0.888233	1.16416	0.808	0	H03AA Thyroid hormones	E	p6m	dementia	0.902
H03AA	Dementia	1.66298	0.201896	8.23685	5.27503	3.55116	7.83573	1.77e-16	-1	H03AA Thyroid hormones	E	p6m	dementia	7.43e-16
H03AA	H03AA1:Dementia	0.179036	0.584947	0.306072	1.19606	0.380054	3.76412	0.76	0	H03AA Thyroid hormones	E	p6m	dementia	0.902
R03BA	R03BA	0.511813	0.104055	4.91867	1.66831	1.36052	2.04574	8.72e-07	-1	R03BA Glucocorticoids	E	p6m	dementia	2.29e-06
R03BA	Dementia	1.68916	0.191931	8.80083	5.41491	3.71722	7.88794	1.36e-18	-1	R03BA Glucocorticoids	E	p6m	dementia	1.43e-17
R03BA	R03BA1:Dementia	0.0878786	1.32515	0.0663159	1.09186	0.0813188	14.6602	0.947	0	R03BA Glucocorticoids	E	p6m	dementia	0.947
A02BC	A02BC	-0.320959	0.0434458	-7.38756	0.725453	0.666234	0.789936	1.53e-13	1	A02BC Proton pump inhibitors [DG:DG01646]	F	p6m	dementia	6.43e-12
A02BC	Dementia	1.50073	0.276369	5.43017	4.48496	2.60918	7.70928	5.67e-08	-1	A02BC Proton pump inhibitors [DG:DG01646]	F	p6m	dementia	1.59e-07
A02BC	A02BC1:Dementia	0.210603	0.474543	0.443802	1.23442	0.486985	3.12905	0.657	0	A02BC Proton pump inhibitors [DG:DG01646]	F	p6m	dementia	0.862
A03AA	A03AA	-0.404409	0.209645	-1.92902	0.667371	0.442497	1.00652	0.0537	0	A03AA Synthetic anticholinergics, esters with tertiary amino group	F	p6m	dementia	0.094
A03AA	Dementia	1.59107	0.226108	7.03675	4.90897	3.15152	7.64648	2.01e-12	-1	A03AA Synthetic anticholinergics, esters with tertiary amino group	F	p6m	dementia	4.22e-11
A03AA	A03AA1:Dementia	-8.75356	120.189	-0.0728318	0.000157898	7.75375e-107	3.21546e+98	0.942	0	A03AA Synthetic anticholinergics, esters with tertiary amino group	F	p6m	dementia	0.97
A10AE	A10AE	-0.733541	0.280337	-2.61664	0.480205	0.2772	0.831879	0.00888	1	A10AE Insulins and analogues for injection, long-acting	F	p6m	dementia	0.0178
A10AE	Dementia	1.53619	0.23174	6.62896	4.64687	2.9505	7.31857	3.44e-11	-1	A10AE Insulins and analogues for injection, long-acting	F	p6m	dementia	2.38e-10
A10AE	A10AE1:Dementia	1.69117	1.11854	1.51193	5.4258	0.605787	48.5968	0.131	0	A10AE Insulins and analogues for injection, long-acting	F	p6m	dementia	0.212
A10BA	A10BA	0.0354487	0.0950478	0.372957	1.03608	0.859978	1.24825	0.709	0	A10BA Biguanides [DG:DG01684]	F	p6m	dementia	0.868
A10BA	Dementia	1.52604	0.237193	6.43376	4.59994	2.88965	7.32251	1.26e-10	-1	A10BA Biguanides [DG:DG01684]	F	p6m	dementia	5.29e-10
A10BA	A10BA1:Dementia	0.791131	0.815089	0.970607	2.20589	0.446428	10.8997	0.332	0	A10BA Biguanides [DG:DG01684]	F	p6m	dementia	0.481
B01AC	B01AC	-0.13514	0.0689969	-1.95864	0.873594	0.763092	1.0001	0.0502	0	B01AC Platelet aggregation inhibitors excl. heparin	F	p6m	dementia	0.0917
B01AC	Dementia	1.50386	0.25968	5.7912	4.49903	2.70439	7.48459	7.06e-09	-1	B01AC Platelet aggregation inhibitors excl. heparin	F	p6m	dementia	2.12e-08
B01AC	B01AC1:Dementia	0.36897	0.524476	0.703502	1.44624	0.517356	4.04291	0.482	0	B01AC Platelet aggregation inhibitors excl. heparin	F	p6m	dementia	0.675
C07AB	C07AB	-0.24629	0.0696606	-3.53557	0.781696	0.681931	0.896056	0.000407	1	C07AB Beta blocking agents, selective	F	p6m	dementia	0.00101
C07AB	Dementia	1.57955	0.247255	6.38834	4.85277	2.98894	7.87883	1.7e-10	-1	C07AB Beta blocking agents, selective	F	p6m	dementia	5.95e-10
C07AB	C07AB1:Dementia	0.0282128	0.599498	0.0470606	1.02861	0.317643	3.33094	0.963	0	C07AB Beta blocking agents, selective	F	p6m	dementia	0.97
C08CA	C08CA	-0.0868465	0.0566836	-1.53213	0.916818	0.820412	1.02455	0.126	0	C08CA Dihydropyridine derivatives [DG:DG01928]	F	p6m	dementia	0.212
C08CA	Dementia	1.57773	0.241918	6.52174	4.84392	3.01487	7.78263	7.06e-11	-1	C08CA Dihydropyridine derivatives [DG:DG01928]	F	p6m	dementia	3.29e-10
C08CA	C08CA1:Dementia	0.0252558	0.665083	0.0379739	1.02558	0.278501	3.77668	0.97	0	C08CA Dihydropyridine derivatives [DG:DG01928]	F	p6m	dementia	0.97
C09AA	C09AA	-0.157055	0.059271	-2.64977	0.854657	0.760919	0.959943	0.00806	1	C09AA ACE inhibitors, plain [DG:DG01501]	F	p6m	dementia	0.0169
C09AA	Dementia	1.54847	0.242123	6.3954	4.70426	2.92677	7.56127	1.62e-10	-1	C09AA ACE inhibitors, plain [DG:DG01501]	F	p6m	dementia	5.95e-10
C09AA	C09AA1:Dementia	0.21651	0.661975	0.327067	1.24174	0.33926	4.54491	0.744	0	C09AA ACE inhibitors, plain [DG:DG01501]	F	p6m	dementia	0.868
C09CA	C09CA	-0.175183	0.0753022	-2.3264	0.839303	0.724134	0.972789	0.02	1	C09CA Angiotensin II receptor blockers, plain [DG:DG01495]	F	p6m	dementia	0.0382
C09CA	Dementia	1.55523	0.23536	6.60789	4.73618	2.98594	7.51232	3.96e-11	-1	C09CA Angiotensin II receptor blockers, plain [DG:DG01495]	F	p6m	dementia	2.38e-10
C09CA	C09CA1:Dementia	0.314653	0.82985	0.379168	1.36978	0.269311	6.96706	0.705	0	C09CA Angiotensin II receptor blockers, plain [DG:DG01495]	F	p6m	dementia	0.868
C10AA	C10AA	-0.0582214	0.0449845	-1.29425	0.943441	0.863818	1.0304	0.196	0	C10AA HMG CoA reductase inhibitors [DG:DG01660]	F	p6m	dementia	0.305
C10AA	Dementia	1.62889	0.269236	6.05007	5.09823	3.00772	8.64176	1.47e-09	-1	C10AA HMG CoA reductase inhibitors [DG:DG01660]	F	p6m	dementia	4.75e-09
C10AA	C10AA1:Dementia	-0.166812	0.490724	-0.339932	0.846358	0.323469	2.2145	0.734	0	C10AA HMG CoA reductase inhibitors [DG:DG01660]	F	p6m	dementia	0.868
G03CA	G03CA	-0.463111	0.0989959	-4.67808	0.629323	0.518328	0.764086	2.91e-06	1	G03CA Natural and semisynthetic estrogens, plain	F	p6m	dementia	7.64e-06
G03CA	Dementia	1.57636	0.226993	6.94453	4.83732	3.10013	7.54796	3.87e-12	-1	G03CA Natural and semisynthetic estrogens, plain	F	p6m	dementia	4.92e-11
G03CA	G03CA1:Dementia	0.0817758	2.17083	0.0376703	1.08521	0.0154038	76.454	0.97	0	G03CA Natural and semisynthetic estrogens, plain	F	p6m	dementia	0.97
G04CB	G04CB	-0.466508	0.159087	-2.9324	0.627189	0.459174	0.85668	0.00337	1	G04CB Testosterone-5-alpha reductase inhibitors	F	p6m	dementia	0.00745
G04CB	Dementia	1.57315	0.228461	6.88585	4.82181	3.08131	7.54544	5.86e-12	-1	G04CB Testosterone-5-alpha reductase inhibitors	F	p6m	dementia	4.92e-11
G04CB	G04CB1:Dementia	0.428884	1.44579	0.296643	1.53554	0.0902723	26.1198	0.767	0	G04CB Testosterone-5-alpha reductase inhibitors	F	p6m	dementia	0.871
H03AA	H03AA	-0.222128	0.0732789	-3.03127	0.800813	0.693671	0.924503	0.00244	1	H03AA Thyroid hormones	F	p6m	dementia	0.00569
H03AA	Dementia	1.5719	0.24056	6.53433	4.81577	3.00533	7.71682	6.49e-11	-1	H03AA Thyroid hormones	F	p6m	dementia	3.29e-10
H03AA	H03AA1:Dementia	0.178421	0.688361	0.259197	1.19533	0.310121	4.60727	0.795	0	H03AA Thyroid hormones	F	p6m	dementia	0.879
R03BA	R03BA	-0.109885	0.11102	-0.989781	0.895937	0.720732	1.11373	0.322	0	R03BA Glucocorticoids	F	p6m	dementia	0.481
R03BA	Dementia	1.57088	0.227582	6.90245	4.81086	3.07962	7.51534	5.21e-12	-1	R03BA Glucocorticoids	F	p6m	dementia	4.92e-11
R03BA	R03BA1:Dementia	1.15799	1.95828	0.591328	3.18352	0.0685405	147.866	0.554	0	R03BA Glucocorticoids	F	p6m	dementia	0.751
A02BC	A02BC	-0.348493	0.0728146	-4.78603	0.705751	0.611884	0.814018	1.71e-06	1	A02BC Proton pump inhibitors [DG:DG01646]	G	p6m	dementia	4.79e-06
A02BC	Dementia	1.82297	0.325079	5.60776	6.19019	3.27329	11.7064	2.07e-08	-1	A02BC Proton pump inhibitors [DG:DG01646]	G	p6m	dementia	7.25e-08
A02BC	A02BC1:Dementia	-0.336818	0.629603	-0.534969	0.714039	0.207864	2.45281	0.593	0	A02BC Proton pump inhibitors [DG:DG01646]	G	p6m	dementia	0.733
A03AA	A03AA	-0.236045	0.322728	-0.731405	0.789745	0.419535	1.48664	0.465	0	A03AA Synthetic anticholinergics, esters with tertiary amino group	G	p6m	dementia	0.63
A03AA	Dementia	1.76101	0.279059	6.31052	5.81829	3.36705	10.0541	2.82e-10	-1	A03AA Synthetic anticholinergics, esters with tertiary amino group	G	p6m	dementia	6.95e-09
A03AA	A03AA1:Dementia	-8.55521	120.057	-0.0712594	0.000192539	1.22244e-106	3.03257e+98	0.943	0	A03AA Synthetic anticholinergics, esters with tertiary amino group	G	p6m	dementia	0.953
A10AE	A10AE	-0.376182	0.349202	-1.07726	0.686477	0.346236	1.36107	0.281	0	A10AE Insulins and analogues for injection, long-acting	G	p6m	dementia	0.427
A10AE	Dementia	1.6641	0.290875	5.72102	5.28093	2.98611	9.33929	1.07e-08	-1	A10AE Insulins and analogues for injection, long-acting	G	p6m	dementia	4.99e-08
A10AE	A10AE1:Dementia	1.91414	1.18515	1.61511	6.78113	0.664448	69.2059	0.106	0	A10AE Insulins and analogues for injection, long-acting	G	p6m	dementia	0.171
A10BA	A10BA	-0.155537	0.14552	-1.06884	0.855955	0.643545	1.13847	0.285	0	A10BA Biguanides [DG:DG01684]	G	p6m	dementia	0.427
A10BA	Dementia	1.70346	0.292959	5.81466	5.49291	3.09332	9.75395	6.14e-09	-1	A10BA Biguanides [DG:DG01684]	G	p6m	dementia	3.68e-08
A10BA	A10BA1:Dementia	0.546935	0.992478	0.55108	1.72795	0.246999	12.0883	0.582	0	A10BA Biguanides [DG:DG01684]	G	p6m	dementia	0.733
B01AC	B01AC	-0.2425	0.107759	-2.2504	0.784664	0.635266	0.969197	0.0244	1	B01AC Platelet aggregation inhibitors excl. heparin	G	p6m	dementia	0.0466
B01AC	Dementia	1.65093	0.325076	5.07859	5.21181	2.75595	9.85611	3.83e-07	-1	B01AC Platelet aggregation inhibitors excl. heparin	G	p6m	dementia	1.15e-06
B01AC	B01AC1:Dementia	0.438627	0.634838	0.690928	1.55058	0.446781	5.38136	0.49	0	B01AC Platelet aggregation inhibitors excl. heparin	G	p6m	dementia	0.643
C07AB	C07AB	-0.276398	0.108247	-2.55341	0.758511	0.613505	0.93779	0.0107	1	C07AB Beta blocking agents, selective	G	p6m	dementia	0.0225
C07AB	Dementia	1.71086	0.312587	5.47322	5.53371	2.99868	10.2118	4.46e-08	-1	C07AB Beta blocking agents, selective	G	p6m	dementia	1.44e-07
C07AB	C07AB1:Dementia	0.221082	0.688086	0.3213	1.24743	0.32381	4.80551	0.748	0	C07AB Beta blocking agents, selective	G	p6m	dementia	0.849
C08CA	C08CA	-0.230444	0.0935222	-2.46406	0.794181	0.661165	0.953958	0.0137	1	C08CA Dihydropyridine derivatives [DG:DG01928]	G	p6m	dementia	0.0274
C08CA	Dementia	1.72825	0.299129	5.77759	5.63077	3.13284	10.1204	7.66e-09	-1	C08CA Dihydropyridine derivatives [DG:DG01928]	G	p6m	dementia	4.02e-08
C08CA	C08CA1:Dementia	0.0800778	0.813431	0.0984445	1.08337	0.219965	5.33581	0.922	0	C08CA Dihydropyridine derivatives [DG:DG01928]	G	p6m	dementia	0.953
C09AA	C09AA	-0.383966	0.100658	-3.81455	0.681155	0.559193	0.829717	0.000137	1	C09AA ACE inhibitors, plain [DG:DG01501]	G	p6m	dementia	0.000338
C09AA	Dementia	1.74988	0.294343	5.94503	5.7539	3.23152	10.2451	2.8e-09	-1	C09AA ACE inhibitors, plain [DG:DG01501]	G	p6m	dementia	2.35e-08
C09AA	C09AA1:Dementia	-0.203205	0.912759	-0.222627	0.816111	0.136387	4.88342	0.824	0	C09AA ACE inhibitors, plain [DG:DG01501]	G	p6m	dementia	0.911
C09CA	C09CA	-0.342357	0.123904	-2.76308	0.710094	0.556986	0.905291	0.00573	1	C09CA Angiotensin II receptor blockers, plain [DG:DG01495]	G	p6m	dementia	0.0127
C09CA	Dementia	1.66939	0.294591	5.66679	5.30891	2.98015	9.45742	1.47e-08	-1	C09CA Angiotensin II receptor blockers, plain [DG:DG01495]	G	p6m	dementia	6.17e-08
C09CA	C09CA1:Dementia	0.822988	0.929256	0.885642	2.2773	0.368469	14.0746	0.376	0	C09CA Angiotensin II receptor blockers, plain [DG:DG01495]	G	p6m	dementia	0.545
C10AA	C10AA	-0.428779	0.0763884	-5.61315	0.651304	0.560736	0.756499	2.01e-08	1	C10AA HMG CoA reductase inhibitors [DG:DG01660]	G	p6m	dementia	7.25e-08
C10AA	Dementia	1.54895	0.350626	4.41768	4.70654	2.3672	9.35768	1e-05	-1	C10AA HMG CoA reductase inhibitors [DG:DG01660]	G	p6m	dementia	2.63e-05
C10AA	C10AA1:Dementia	0.458197	0.578206	0.792446	1.58122	0.509098	4.91116	0.428	0	C10AA HMG CoA reductase inhibitors [DG:DG01660]	G	p6m	dementia	0.599
G03CA	G03CA	-0.36432	0.18619	-1.95671	0.694669	0.482266	1.00062	0.0504	0	G03CA Natural and semisynthetic estrogens, plain	G	p6m	dementia	0.0882
G03CA	Dementia	1.73677	0.280651	6.18835	5.67895	3.27618	9.84394	6.16e-10	-1	G03CA Natural and semisynthetic estrogens, plain	G	p6m	dementia	6.95e-09
G03CA	G03CA1:Dementia	0.810378	2.19181	0.36973	2.24876	0.0306331	165.08	0.712	0	G03CA Natural and semisynthetic estrogens, plain	G	p6m	dementia	0.831
G04CB	G04CB	-0.521947	0.237617	-2.19659	0.593364	0.372437	0.945344	0.0281	1	G04CB Testosterone-5-alpha reductase inhibitors	G	p6m	dementia	0.0513
G04CB	Dementia	1.74341	0.282239	6.17708	5.71681	3.28777	9.94045	6.62e-10	-1	G04CB Testosterone-5-alpha reductase inhibitors	G	p6m	dementia	6.95e-09
G04CB	G04CB1:Dementia	0.230447	1.75058	0.13164	1.25916	0.0407305	38.9263	0.895	0	G04CB Testosterone-5-alpha reductase inhibitors	G	p6m	dementia	0.953
H03AA	H03AA	-0.415724	0.134628	-3.08793	0.659863	0.506819	0.859121	0.00202	1	H03AA Thyroid hormones	G	p6m	dementia	0.00471
H03AA	Dementia	1.73079	0.296822	5.83107	5.64511	3.15505	10.1004	5.57e-09	-1	H03AA Thyroid hormones	G	p6m	dementia	3.68e-08
H03AA	H03AA1:Dementia	0.31798	0.855543	0.37167	1.37435	0.256937	7.35137	0.71	0	H03AA Thyroid hormones	G	p6m	dementia	0.831
R03BA	R03BA	-0.376345	0.21339	-1.76365	0.686366	0.451763	1.0428	0.0778	0	R03BA Glucocorticoids	G	p6m	dementia	0.131
R03BA	Dementia	1.75223	0.278929	6.28199	5.76746	3.33848	9.96368	3.39e-10	-1	R03BA Glucocorticoids	G	p6m	dementia	6.95e-09
R03BA	R03BA1:Dementia	-8.21593	138.53	-0.0593079	0.000270314	3.23404e-122	2.25939e+114	0.953	0	R03BA Glucocorticoids	G	p6m	dementia	0.953
A02BC	A02BC	-0.0321137	0.198901	-0.161455	0.968396	0.655753	1.4301	0.872	0	A02BC Proton pump inhibitors [DG:DG01646]	H	p6m	dementia	0.99
A02BC	Dementia	3.00613	0.427968	7.02421	20.2091	8.73462	46.7573	2.2e-12	-1	A02BC Proton pump inhibitors [DG:DG01646]	H	p6m	dementia	1.15e-11
A02BC	A02BC1:Dementia	-0.392387	0.80961	-0.484662	0.675442	0.138171	3.30187	0.628	0	A02BC Proton pump inhibitors [DG:DG01646]	H	p6m	dementia	0.803
A03AA	A03AA	-14.0949	597.322	-0.0235968	7.5625e-07	0	Inf	0.981	0	A03AA Synthetic anticholinergics, esters with tertiary amino group	H	p6m	dementia	1
A03AA	Dementia	2.89629	0.366438	7.90392	18.1069	8.82913	37.1339	2.81e-15	-1	A03AA Synthetic anticholinergics, esters with tertiary amino group	H	p6m	dementia	4.28e-14
A03AA	A03AA1:Dementia	-3.50457	10684.5	-0.000328006	0.0300598	0	Inf	1	0	A03AA Synthetic anticholinergics, esters with tertiary amino group	H	p6m	dementia	1
A10AE	A10AE	0.141861	0.796849	0.178028	1.15242	0.241713	5.49439	0.859	0	A10AE Insulins and analogues for injection, long-acting	H	p6m	dementia	0.99
A10AE	Dementia	2.7309	0.391555	6.97451	15.3467	7.12376	33.0615	3.14e-12	-1	A10AE Insulins and analogues for injection, long-acting	H	p6m	dementia	1.32e-11
A10AE	A10AE1:Dementia	2.25355	1.41944	1.58764	9.52151	0.58942	153.811	0.112	0	A10AE Insulins and analogues for injection, long-acting	H	p6m	dementia	0.287
A10BA	A10BA	-0.373377	0.414894	-0.899933	0.688406	0.30526	1.55245	0.368	0	A10BA Biguanides [DG:DG01684]	H	p6m	dementia	0.664
A10BA	Dementia	2.82329	0.386564	7.30354	16.8321	7.89003	35.9084	2.88e-13	-1	A10BA Biguanides [DG:DG01684]	H	p6m	dementia	1.73e-12
A10BA	A10BA1:Dementia	0.726515	1.2211	0.594968	2.06786	0.188831	22.6448	0.552	0	A10BA Biguanides [DG:DG01684]	H	p6m	dementia	0.802
B01AC	B01AC	-0.076646	0.256351	-0.298989	0.926218	0.560399	1.53084	0.765	0	B01AC Platelet aggregation inhibitors excl. heparin	H	p6m	dementia	0.918
B01AC	Dementia	2.58608	0.464384	5.56884	13.2776	5.34341	32.9931	2.59e-08	-1	B01AC Platelet aggregation inhibitors excl. heparin	H	p6m	dementia	8.37e-08
B01AC	B01AC1:Dementia	0.986935	0.767251	1.28633	2.683	0.596357	12.0708	0.198	0	B01AC Platelet aggregation inhibitors excl. heparin	H	p6m	dementia	0.416
C07AB	C07AB	0.142929	0.243535	0.586893	1.15365	0.715759	1.85943	0.557	0	C07AB Beta blocking agents, selective	H	p6m	dementia	0.802
C07AB	Dementia	2.78955	0.437542	6.37551	16.2737	6.90294	38.3654	1.85e-10	-1	C07AB Beta blocking agents, selective	H	p6m	dementia	6.47e-10
C07AB	C07AB1:Dementia	0.384604	0.800862	0.480237	1.46903	0.305707	7.05922	0.631	0	C07AB Beta blocking agents, selective	H	p6m	dementia	0.803
C08CA	C08CA	-0.200715	0.244288	-0.821633	0.818146	0.506854	1.32062	0.411	0	C08CA Dihydropyridine derivatives [DG:DG01928]	H	p6m	dementia	0.664
C08CA	Dementia	2.89551	0.391007	7.40526	18.0927	8.40744	38.9355	1.35e-13	-1	C08CA Dihydropyridine derivatives [DG:DG01928]	H	p6m	dementia	9.45e-13
C08CA	C08CA1:Dementia	-0.111791	1.08703	-0.10284	0.894231	0.1062	7.52969	0.918	0	C08CA Dihydropyridine derivatives [DG:DG01928]	H	p6m	dementia	1
C09AA	C09AA	-0.403969	0.262335	-1.5399	0.667665	0.399254	1.11652	0.124	0	C09AA ACE inhibitors, plain [DG:DG01501]	H	p6m	dementia	0.289
C09AA	Dementia	2.9312	0.388092	7.55286	18.7501	8.76284	40.1202	4.39e-14	-1	C09AA ACE inhibitors, plain [DG:DG01501]	H	p6m	dementia	3.69e-13
C09AA	C09AA1:Dementia	-0.454764	1.1527	-0.394523	0.634597	0.0662641	6.07741	0.693	0	C09AA ACE inhibitors, plain [DG:DG01501]	H	p6m	dementia	0.856
C09CA	C09CA	-0.257538	0.305949	-0.841767	0.772953	0.424343	1.40795	0.4	0	C09CA Angiotensin II receptor blockers, plain [DG:DG01495]	H	p6m	dementia	0.664
[truncated: 22,193 more rows]
