# Supplementary material for: Exploring Drugs and Vaccines Associated with Altered Risks and Severity of COVID-19: A UK Biobank Cohort Study of All ATC Level-4 Drug Categories Reveals Repositioning Opportunities
Source: Pharmaceutics. 2021 Sep 18;13(9):1514. doi: 10.3390/pharmaceutics13091514 (PMC8471264; doi:10.3390/pharmaceutics13091514)
Supplement: Supplementary file 1 [file pharmaceutics-13-01514-s001.zip › TableS14_Flu_vaccine_effect_by_season.xlsx]

## Sheet: Counts
Count of number of subjects receiving flu vaccine by season
	No	Yes
all_used_in_19-20	360313	46650
all_used_in_18-19	361429	45534
all_used_in_17-18	362536	44427
all_used_in_16-17	365040	41923
all_used_in_15-16	366076	40887
consective_used_in_p2seasons	371944	35019
consective_used_in_p3seasons	380239	26724
consective_used_in_p4seasons	386176	20787
consective_used_in_p5seasons	390256	16707
only_19_no_18	395332	11631
only_18_no_19	396448	10515
over2_p3seasons	362472	44491
over3_p4seasons	371566	35397
over2_p4seasons	355530	51433
over4_p5seasons	378266	28697
over3_p5seasons	365129	41834
over2_p5seasons	350210	56753
Labeling explanation for the table:
We consider 1 Sep as the 'cut-off' for a season; eg vaccines taken after Sep 1 2019 are regarded vaccine taken in the 19-20 season. Multiple imputation performed on covariates with IPW of Pr(tested)
all_used_in_19-20_: All the subjects who took flu vaccine in 2019-2020 (regardlesss of whether he/she took the vaccine in other seasons)
all_used_in_18-19_: All the subjects who took flu vaccine in 2018-2019 (regardlesss of whether he/she took the vaccine in other seasons)
consective_used_in_p2seasons: subjects who took flu vaccine in 2018-2019 and 2019-2020 consecutively; similar for other items.
only_19_no_18: subjects who took the flu vaccine only in 2019-2020, but not in 2018-2019.
only_18_no_19: subjects who took the flu vaccine only in 2018-2019, but not in 2019-2020.
over2_p3seasons: subjects who received flu vaccine for 2 or more than 2 times in the past 3 seasons (2017-2020); similar for other items
Results from each model are listed in a separate tab.

## Sheet: Model_a
term	case_notx	case_tx	ctrl_notx	ctrl_tx	estimate	std.error	statistic	OR	conf.low	conf.high	p	sig
all_used_in_19-20	1189	129	2365	175	0.0324	0.135444	0.239214	1.03293	0.792036	1.34709	0.811	0
all_used_in_18-19	1187	131	2366	174	0.0680848	0.13595	0.500806	1.07046	0.819995	1.39742	0.6165	0
all_used_in_17-18	1186	132	2361	179	-0.00477299	0.135751	-0.0351599	0.995238	0.762674	1.29872	0.972	0
all_used_in_16-17	1185	133	2383	157	0.148768	0.139316	1.06785	1.1604	0.883051	1.52487	0.2857	0
all_used_in_15-16	1187	131	2369	171	0.00675001	0.138288	0.0488113	1.00677	0.767686	1.32032	0.9611	0
consective_used_in_p2yrs	1218	100	2420	120	0.145879	0.156387	0.932809	1.15706	0.851521	1.57222	0.351	0
consective_used_in_p3yrs	1239	79	2452	88	0.180986	0.179334	1.00921	1.1984	0.843147	1.70333	0.3129	0
consective_used_in_p4yrs	1256	62	2475	65	0.275766	0.20347	1.35532	1.31754	0.884128	1.96341	0.1754	0
consective_used_in_p5yrs	1266	52	2485	55	0.26294	0.222853	1.17988	1.30075	0.840312	2.01348	0.2381	0
only_19_no_18	1289	29	2485	55	-0.256418	0.255026	-1.00546	0.773818	0.469345	1.27581	0.3147	0
only_18_no_19	1287	31	2486	54	-0.139807	0.252959	-0.552687	0.869526	0.529537	1.42781	0.5805	0
over2_p3yrs	1192	126	2376	164	0.0583906	0.139084	0.419822	1.06013	0.80711	1.39247	0.6746	0
over3_p4yrs	1216	102	2416	124	0.0760378	0.157444	0.482951	1.079	0.792436	1.4692	0.6292	0
over2_p4yrs	1171	147	2338	202	-0.0123392	0.12912	-0.0955643	0.987737	0.766831	1.27228	0.9239	0
over4_p5yrs	1234	84	2438	102	0.0688957	0.171756	0.401125	1.07132	0.765025	1.50026	0.6884	0
over3_p5yrs	1198	120	2380	160	-0.0241516	0.143896	-0.167841	0.976138	0.736187	1.2943	0.8667	0
over2_p5yrs	1146	172	2316	224	0.0329343	0.121836	0.270316	1.03348	0.813885	1.31233	0.7869	0

## Sheet: Model_b
term	case_notx	case_tx	ctrl_notx	ctrl_tx	estimate	std.error	statistic	OR	conf.low	conf.high	p	sig
all_used_in_19-20	162	8	3392	296	-0.968242	0.425793	-2.27397	0.37975	0.164797	0.87508	0.02302	1
all_used_in_18-19	162	8	3391	297	-1.12096	0.435392	-2.57461	0.325965	0.138819	0.765411	0.01007	1
all_used_in_17-18	162	8	3385	303	-1.09318	0.417561	-2.61801	0.335149	0.147808	0.75994	0.008879	1
all_used_in_16-17	160	10	3408	280	-1.02524	0.410846	-2.49544	0.35871	0.160295	0.802725	0.01262	1
all_used_in_15-16	158	12	3398	290	-0.630358	0.351291	-1.7944	0.532401	0.267377	1.06012	0.07283	0
consective_used_in_p2yrs	164	6	3474	214	-1.14217	0.523462	-2.18195	0.319127	0.114354	0.890585	0.02917	1
consective_used_in_p3yrs	166	4	3525	163	-1.25064	0.611723	-2.04446	0.286321	0.0862956	0.949984	0.04098	1
consective_used_in_p4yrs	168	2	3563	125	-1.70923	0.850653	-2.00931	0.181006	0.0341496	0.959395	0.04457	1
consective_used_in_p5yrs	168	2	3583	105	-1.52585	0.853107	-1.78858	0.217435	0.0408257	1.15805	0.07376	0
only_19_no_18	168	2	3606	82	-0.43828	0.705853	-0.620923	0.645145	0.161675	2.57437	0.5347	0
only_18_no_19	168	2	3605	83	-0.936512	0.755516	-1.23957	0.391993	0.0891207	1.72416	0.2152	0
over2_p3yrs	164	6	3404	284	-1.49958	0.52218	-2.87177	0.223223	0.0801897	0.621384	0.004104	1
over3_p4yrs	165	5	3467	221	-1.44202	0.565277	-2.551	0.236449	0.0780588	0.716233	0.01078	1
over2_p4yrs	163	7	3346	342	-1.52713	0.472684	-3.23076	0.217158	0.0859607	0.548596	0.001245	1
over4_p5yrs	167	3	3505	183	-1.85128	0.734673	-2.51987	0.157036	0.0371918	0.663059	0.01178	1
over3_p5yrs	164	6	3414	274	-1.42534	0.500252	-2.84925	0.240426	0.0901637	0.641107	0.004406	1
over2_p5yrs	158	12	3304	384	-1.05893	0.366314	-2.89078	0.346826	0.169124	0.711241	0.003864	1

## Sheet: Model_c
term	case_notx	case_tx	ctrl_notx	ctrl_tx	estimate	std.error	statistic	OR	conf.low	conf.high	p	sig
all_used_in_19-20	1189	129	346811	46331	-0.301061	0.104017	-2.89434	0.740033	0.603547	0.907383	0.0038	1
all_used_in_18-19	1187	131	347984	45158	-0.241873	0.102971	-2.34894	0.785156	0.641662	0.960739	0.01883	1
all_used_in_17-18	1186	132	349194	43948	-0.211329	0.103327	-2.04525	0.809507	0.661102	0.991227	0.04083	1
all_used_in_16-17	1185	133	351729	41413	-0.142654	0.10343	-1.37924	0.867054	0.707956	1.06191	0.1678	0
all_used_in_15-16	1187	131	352855	40287	-0.135456	0.104442	-1.29695	0.873317	0.711657	1.0717	0.1946	0
consective_used_in_p2yrs	1218	100	358352	34790	-0.246667	0.117088	-2.10669	0.781401	0.621167	0.982968	0.03515	1
consective_used_in_p3yrs	1239	79	366592	26550	-0.224758	0.131952	-1.70334	0.79871	0.616696	1.03444	0.08851	0
consective_used_in_p4yrs	1256	62	372487	20655	-0.193109	0.146807	-1.3154	0.824392	0.61826	1.09925	0.1884	0
consective_used_in_p5yrs	1266	52	376547	16595	-0.153782	0.160459	-0.95839	0.857459	0.62608	1.17435	0.3379	0
only_19_no_18	1289	29	381601	11541	-0.403502	0.207877	-1.94106	0.667977	0.444442	1.00394	0.05225	0
only_18_no_19	1287	31	382774	10368	-0.182653	0.197283	-0.925845	0.833057	0.565909	1.22632	0.3545	0
over2_p3yrs	1192	126	348995	44147	-0.273559	0.105555	-2.59163	0.760667	0.618509	0.9355	0.009553	1
over3_p4yrs	1216	102	358004	35138	-0.283757	0.11797	-2.40534	0.752949	0.597516	0.948816	0.01616	1
over2_p4yrs	1171	147	342178	50964	-0.268135	0.0988059	-2.71376	0.764805	0.630154	0.928228	0.006653	1
over4_p5yrs	1234	84	364655	28487	-0.247031	0.128433	-1.92342	0.781116	0.607285	1.0047	0.05443	0
over3_p5yrs	1198	120	351676	41466	-0.282114	0.109263	-2.58197	0.754188	0.608799	0.934296	0.009824	1
over2_p5yrs	1146	172	337008	56134	-0.20294	0.0925061	-2.1938	0.816327	0.680962	0.978602	0.02825	1

## Sheet: Model_d
term	case_notx	case_tx	ctrl_notx	ctrl_tx	estimate	std.error	statistic	OR	conf.low	conf.high	p	sig
all_used_in_19-20	162	8	346811	46331	-1.26358	0.407339	-3.10204	0.28264	0.127205	0.628003	0.001922	1
all_used_in_18-19	162	8	347984	45158	-1.29947	0.415802	-3.1252	0.272678	0.120703	0.616002	0.001777	1
all_used_in_17-18	162	8	349194	43948	-1.19792	0.397592	-3.01294	0.301821	0.138458	0.657932	0.002587	1
all_used_in_16-17	160	10	351729	41413	-1.1242	0.387568	-2.90065	0.324912	0.152008	0.69449	0.003724	1
all_used_in_15-16	158	12	352855	40287	-0.778542	0.330736	-2.35397	0.459075	0.240082	0.877824	0.01857	1
consective_used_in_p2yrs	164	6	358352	34790	-1.43341	0.505436	-2.83598	0.238495	0.0885627	0.642257	0.004569	1
consective_used_in_p3yrs	166	4	366592	26550	-1.4984	0.590303	-2.53835	0.223488	0.0702727	0.710759	0.01114	1
consective_used_in_p4yrs	168	2	372487	20655	-1.97328	0.830521	-2.37595	0.139001	0.0272944	0.70788	0.0175	1
consective_used_in_p5yrs	168	2	376547	16595	-1.77939	0.830646	-2.14218	0.168741	0.0331262	0.859547	0.03218	1
only_19_no_18	168	2	381601	11541	-0.698264	0.665191	-1.04972	0.497448	0.135062	1.83215	0.2938	0
only_18_no_19	168	2	382774	10368	-0.780535	0.70616	-1.10532	0.458161	0.114797	1.82854	0.269	0
over2_p3yrs	164	6	348995	44147	-1.71813	0.50535	-3.39988	0.179401	0.0666299	0.483039	0.0006742	1
over3_p4yrs	165	5	358004	35138	-1.66815	0.545509	-3.05797	0.188596	0.0647429	0.549379	0.002229	1
over2_p4yrs	163	7	342178	50964	-1.66263	0.4541	-3.66138	0.189639	0.0778747	0.461806	0.0002509	1
over4_p5yrs	167	3	364655	28487	-2.04609	0.715639	-2.85911	0.129239	0.0317863	0.525472	0.004249	1
over3_p5yrs	164	6	351676	41466	-1.59796	0.482074	-3.31477	0.202308	0.0786448	0.520423	0.0009173	1
over2_p5yrs	158	12	337008	56134	-1.18548	0.347586	-3.41059	0.305601	0.154628	0.603978	0.0006483	1

## Sheet: Model_e
term	case_notx	case_tx	ctrl_notx	ctrl_tx	estimate	std.error	statistic	OR	conf.low	conf.high	p	sig
all_used_in_19-20	3554	304	346811	46331	-0.312048	0.0624907	-4.99352	0.731946	0.64757	0.827316	5.931e-07	1
all_used_in_18-19	3553	305	347984	45158	-0.287756	0.0630974	-4.56051	0.749944	0.662705	0.848668	5.104e-06	1
all_used_in_17-18	3547	311	349194	43948	-0.214159	0.0625216	-3.42536	0.80722	0.714123	0.912453	0.000614	1
all_used_in_16-17	3568	290	351729	41413	-0.225936	0.0653426	-3.45771	0.797769	0.701871	0.90677	0.0005448	1
all_used_in_15-16	3556	302	352855	40287	-0.122391	0.0640972	-1.90945	0.884803	0.780345	1.00324	0.0562	0
consective_used_in_p2yrs	3638	220	358352	34790	-0.336831	0.073619	-4.57532	0.71403	0.61809	0.824862	4.756e-06	1
consective_used_in_p3yrs	3691	167	366592	26550	-0.340345	0.0848824	-4.00961	0.711525	0.602473	0.840315	6.083e-05	1
consective_used_in_p4yrs	3731	127	372487	20655	-0.330517	0.0966243	-3.42064	0.718552	0.594581	0.868371	0.0006248	1
consective_used_in_p5yrs	3751	107	376547	16595	-0.26875	0.105759	-2.54115	0.764334	0.621242	0.940386	0.01105	1
only_19_no_18	3774	84	381601	11541	-0.205969	0.110173	-1.86952	0.813858	0.655797	1.01002	0.06155	0
only_18_no_19	3773	85	382774	10368	-0.113509	0.113646	-0.998794	0.892696	0.714443	1.11542	0.3179	0
over2_p3yrs	3568	290	348995	44147	-0.3071	0.0646453	-4.75054	0.735577	0.64804	0.834938	2.029e-06	1
over3_p4yrs	3632	226	358004	35138	-0.328825	0.0736234	-4.46631	0.719769	0.623052	0.831499	7.96e-06	1
over2_p4yrs	3509	349	342178	50964	-0.264323	0.0595502	-4.43866	0.767726	0.683151	0.862771	9.055e-06	1
over4_p5yrs	3672	186	364655	28487	-0.273935	0.0804838	-3.40361	0.760381	0.649416	0.890307	0.0006651	1
over3_p5yrs	3578	280	351676	41466	-0.266583	0.0664432	-4.0122	0.765992	0.672462	0.872531	6.017e-05	1
over2_p5yrs	3462	396	337008	56134	-0.231594	0.0564062	-4.10582	0.793268	0.710243	0.885999	4.03e-05	1

## Sheet: Model_f
term	case_notx	case_tx	ctrl_notx	ctrl_tx	estimate	std.error	statistic	OR	conf.low	conf.high	p	sig
all_used_in_19-20	3554	304	22905	4072	-0.51536	0.0652543	-7.89772	0.597285	0.525575	0.678779	2.935e-15	1
all_used_in_18-19	3553	305	23015	3962	-0.465047	0.0659936	-7.04686	0.628105	0.551895	0.714839	1.868e-12	1
all_used_in_17-18	3547	311	23092	3885	-0.387811	0.0655014	-5.92065	0.678541	0.596786	0.771495	3.241e-09	1
all_used_in_16-17	3568	290	23238	3739	-0.401113	0.0683715	-5.86667	0.669574	0.585596	0.765595	4.492e-09	1
all_used_in_15-16	3556	302	23309	3668	-0.274621	0.0673282	-4.07884	0.75986	0.665919	0.867053	4.537e-05	1
consective_used_in_p2yrs	3638	220	23900	3077	-0.524489	0.0766466	-6.84295	0.591858	0.509299	0.687799	7.903e-12	1
consective_used_in_p3yrs	3691	167	24618	2359	-0.509731	0.0882766	-5.77425	0.600657	0.505222	0.714119	7.804e-09	1
consective_used_in_p4yrs	3731	127	25069	1908	-0.531412	0.100327	-5.29681	0.587774	0.482846	0.715504	1.186e-07	1
consective_used_in_p5yrs	3751	107	25425	1552	-0.45499	0.109969	-4.13746	0.634454	0.511436	0.787063	3.521e-05	1
only_19_no_18	3774	84	25982	995	-0.407868	0.115715	-3.52478	0.665067	0.530109	0.834383	0.0004245	1
only_18_no_19	3773	85	26092	885	-0.222995	0.120456	-1.85126	0.800119	0.631856	1.01319	0.06414	0
over2_p3yrs	3568	290	23062	3915	-0.496945	0.0674693	-7.36549	0.608387	0.533025	0.694404	1.809e-13	1
over3_p4yrs	3632	226	23829	3148	-0.498967	0.0766596	-6.50887	0.607158	0.522452	0.705597	7.688e-11	1
over2_p4yrs	3509	349	22469	4508	-0.445162	0.0623237	-7.14274	0.640721	0.567044	0.72397	9.352e-13	1
over4_p5yrs	3672	186	24340	2637	-0.471338	0.083772	-5.62643	0.624167	0.529652	0.735547	1.856e-08	1
over3_p5yrs	3578	280	23250	3727	-0.431804	0.0694141	-6.22069	0.649337	0.566738	0.743974	5.013e-10	1
over2_p5yrs	3462	396	22041	4936	-0.405211	0.059142	-6.8515	0.666836	0.593848	0.748795	7.445e-12	1

## Sheet: Model_g
term	case_notx	case_tx	ctrl_notx	ctrl_tx	estimate	std.error	statistic	OR	conf.low	conf.high	p	sig
all_used_in_19-20	1189	129	22905	4072	-0.48616	0.105806	-4.59484	0.614983	0.499802	0.75671	4.35e-06	1
all_used_in_18-19	1187	131	23015	3962	-0.407814	0.10488	-3.8884	0.665103	0.541516	0.816895	0.0001011	1
all_used_in_17-18	1186	132	23092	3885	-0.36966	0.105278	-3.51126	0.690969	0.562137	0.849328	0.0004467	1
all_used_in_16-17	1185	133	23238	3739	-0.306244	0.105494	-2.90296	0.736207	0.598687	0.905316	0.003699	1
all_used_in_15-16	1187	131	23309	3668	-0.281147	0.106665	-2.6358	0.754917	0.612494	0.930458	0.008399	1
consective_used_in_p2yrs	1218	100	23900	3077	-0.41885	0.119133	-3.51583	0.657803	0.520817	0.830818	0.0004391	1
consective_used_in_p3yrs	1239	79	24618	2359	-0.378837	0.134301	-2.82081	0.684657	0.5262	0.890831	0.004794	1
consective_used_in_p4yrs	1256	62	25069	1908	-0.376949	0.149428	-2.52261	0.685951	0.511793	0.919373	0.01165	1
consective_used_in_p5yrs	1266	52	25425	1552	-0.332384	0.163537	-2.03246	0.717212	0.520521	0.988227	0.04212	1
only_19_no_18	1289	29	25982	995	-0.583211	0.211125	-2.7624	0.558104	0.368975	0.844175	0.005742	1
only_18_no_19	1287	31	26092	885	-0.293912	0.201774	-1.45664	0.745342	0.501878	1.10691	0.1452	0
over2_p3yrs	1192	126	23062	3915	-0.443698	0.1074	-4.13125	0.641659	0.519854	0.792005	3.618e-05	1
over3_p4yrs	1216	102	23829	3148	-0.437762	0.120061	-3.64618	0.645479	0.510132	0.816737	0.0002666	1
over2_p4yrs	1171	147	22469	4508	-0.435852	0.10062	-4.33168	0.646713	0.530959	0.787704	1.485e-05	1
over4_p5yrs	1234	84	24340	2637	-0.421928	0.130673	-3.22889	0.655781	0.507605	0.847213	0.001244	1
over3_p5yrs	1198	120	23250	3727	-0.433661	0.111262	-3.89765	0.648132	0.521138	0.806072	9.735e-05	1
over2_p5yrs	1146	172	22041	4936	-0.366079	0.0943244	-3.88106	0.693448	0.576397	0.83427	0.0001042	1

## Sheet: Model_h
term	case_notx	case_tx	ctrl_notx	ctrl_tx	estimate	std.error	statistic	OR	conf.low	conf.high	p	sig
all_used_in_19-20	162	8	22905	4072	-1.4502	0.409877	-3.53813	0.234524	0.105023	0.52371	0.0004036	1
all_used_in_18-19	162	8	23015	3962	-1.47416	0.417858	-3.5279	0.22897	0.100944	0.51937	0.0004196	1
all_used_in_17-18	162	8	23092	3885	-1.3432	0.399759	-3.36003	0.261009	0.119224	0.571408	0.0007804	1
all_used_in_16-17	160	10	23238	3739	-1.27628	0.390207	-3.27077	0.279074	0.129885	0.599624	0.001074	1
all_used_in_15-16	158	12	23309	3668	-0.905156	0.333426	-2.71471	0.404479	0.210412	0.777537	0.006637	1
consective_used_in_p2yrs	164	6	23900	3077	-1.59777	0.507403	-3.14891	0.202348	0.0748474	0.547042	0.001641	1
consective_used_in_p3yrs	166	4	24618	2359	-1.6258	0.591995	-2.74631	0.196754	0.0616586	0.627845	0.006031	1
consective_used_in_p4yrs	168	2	25069	1908	-2.1132	0.831771	-2.5406	0.120851	0.0236707	0.617	0.01107	1
consective_used_in_p5yrs	168	2	25425	1552	-1.92426	0.832142	-2.31242	0.145984	0.0285728	0.745859	0.02076	1
only_19_no_18	168	2	25982	995	-0.902615	0.675842	-1.33554	0.405508	0.107819	1.52511	0.1817	0
only_18_no_19	168	2	26092	885	-0.940033	0.711968	-1.32033	0.390615	0.0967594	1.5769	0.1867	0
over2_p3yrs	164	6	23062	3915	-1.88472	0.507143	-3.71635	0.151872	0.0562052	0.410371	0.0002025	1
over3_p4yrs	165	5	23829	3148	-1.82069	0.547647	-3.32457	0.161914	0.0553483	0.473656	0.0008867	1
over2_p4yrs	163	7	22469	4508	-1.82981	0.455963	-4.01306	0.160444	0.0656432	0.392155	6.01e-05	1
over4_p5yrs	167	3	24340	2637	-2.20694	0.717537	-3.07571	0.110037	0.0269615	0.449092	0.002102	1
over3_p5yrs	164	6	23250	3727	-1.74828	0.484071	-3.61163	0.174072	0.0674015	0.449562	0.0003048	1
over2_p5yrs	158	12	22041	4936	-1.35076	0.349911	-3.8603	0.259042	0.130471	0.514315	0.0001135	1
