# Supplementary material for: Exploring Drugs and Vaccines Associated with Altered Risks and Severity of COVID-19: A UK Biobank Cohort Study of All ATC Level-4 Drug Categories Reveals Repositioning Opportunities
Source: Pharmaceutics. 2021 Sep 18;13(9):1514. doi: 10.3390/pharmaceutics13091514 (PMC8471264; doi:10.3390/pharmaceutics13091514)
Supplement: Supplementary file 1 [file pharmaceutics-13-01514-s001.zip › TableS15_Results_controlling_for_other_drugs_rm10yrs.xlsx]

## Sheet: Note on Table S19
	A note on Table S19
	The tables here showed the regression results after controlling for other top drugs.
	For Tables a and b, we only focus on protective drugs. We controlled for other top protective drugs (model and window-specific) with FDR<0.05 or 0.1.
	For Tables c and d, for each protective drug, we controlled for the other top 10 or 20 protective drugs (if number of protective drugs is less than 10 or 20, all protective drugs will be included).
	Similarly, for each drug with harmful effect, we controlled for the other top 10 or 20 harmful drugs.
	Labeling in the table:
	1. All labeled with1, such as beta1 represents the statistics/p-value without controlling for other top drugs;
	2. All labeled with 2, such as beta 2 represents the statistics/p-value after controlling for other top drugs.

## Sheet: A-DRUG-CTRL-PRO-ONLY-FDR-01
A Controlling for other top protective drugs With FDR<0.1
drug	case_notx	case_tx	ctrl_notx	ctrl_tx	beta1	se1	beta2	se2	OR2	conf.low2	conf.high2	p1	fdr.05	fdr.1	p2	sig1	sig2	Full name	Model	Windows
C10AA	895	423	291331	101811	-0.239738	0.0740346	-0.200036	0.0761222	0.818701	0.705229	0.950432	0.001203	1	1	0.008593	1	1	D C10AA HMG CoA reductase inhibitors [DG:DG01660]	C	p6m
C09AA	1132	186	347068	46074	-0.291268	0.0986432	-0.22571	0.101692	0.79795	0.653755	0.973948	0.00315	1	1	0.02645	1	1	D C09AA ACE inhibitors, plain [DG:DG01501]	C	p6m
C10AA	895	423	17425	9552	-0.422274	0.0757922	-0.282232	0.0790978	0.754099	0.645799	0.880561	2.549e-08	1	1	0.0003601	1	1	D C10AA HMG CoA reductase inhibitors [DG:DG01660]	G	p6m
A02BC	925	393	17691	9286	-0.353462	0.0724149	-0.267273	0.0735047	0.765464	0.662758	0.884087	1.061e-06	1	1	0.0002773	1	1	D A02BC Proton pump inhibitors [DG:DG01646]	G	p6m
C09AA	1132	186	22656	4321	-0.386733	0.100173	-0.335947	0.10563	0.714661	0.58101	0.879055	0.0001133	1	1	0.001472	1	1	D C09AA ACE inhibitors, plain [DG:DG01501]	G	p6m
H03AA	1237	81	24575	2402	-0.40879	0.13289	-0.351387	0.133309	0.703711	0.541897	0.913844	0.002099	1	1	0.008396	1	1	D H03AA Thyroid hormones	G	p6m
C09CA	1208	110	24281	2696	-0.330825	0.122655	-0.333881	0.127156	0.716139	0.558158	0.918835	0.006997	0	1	0.00865	1	1	D C09CA Angiotensin II receptor blockers, plain [DG:DG01495]	G	p6m
C07AB	1132	186	22972	4005	-0.271937	0.107139	-0.0732651	0.110661	0.929354	0.748139	1.15446	0.01115	0	0	0.5079	1	0	D C07AB Beta blocking agents, selective	G	p6m
S01EE	1298	20	26322	655	-0.72335	0.291172	-0.682747	0.291645	0.505227	0.285251	0.894841	0.01299	0	0	0.01924	1	1	D S01EE Prostaglandin analogues	G	p6m
C08CA	1103	215	22493	4484	-0.229813	0.0929402	-0.0823178	0.0954997	0.920979	0.76376	1.11056	0.01342	0	0	0.3887	1	0	D C08CA Dihydropyridine derivatives [DG:DG01928]	G	p6m
S01ED	1309	9	26576	401	-0.94924	0.406913	-0.905939	0.407644	0.404162	0.181783	0.898582	0.01967	0	0	0.02627	1	1	D S01ED Beta blocking agents	G	p6m
G04CB	1286	32	26132	845	-0.520371	0.235326	-0.434601	0.235959	0.647523	0.407753	1.02828	0.02702	0	0	0.06551	1	0	D G04CB Testosterone-5-alpha reductase inhibitors	G	p6m
B01AC	1112	206	23000	3977	-0.232442	0.106266	0.0437522	0.113537	1.04472	0.836285	1.30511	0.02872	0	0	0.7	1	0	D B01AC Platelet aggregation inhibitors excl. heparin	G	p6m
C10AA	854	464	255620	137522	-0.716256	0.0756799	-0.606863	0.0776794	0.545058	0.468082	0.634693	2.971e-21	1	1	5.625e-15	1	1	D C10AA HMG CoA reductase inhibitors [DG:DG01660]	C	p1yr
C09AA	1098	220	331703	61439	-0.488408	0.0931624	-0.47571	0.0992975	0.621443	0.511539	0.75496	1.585e-07	1	1	1.662e-06	1	1	D C09AA ACE inhibitors, plain [DG:DG01501]	C	p1yr
H03AA	1234	84	359009	34133	-0.482573	0.128709	-0.465681	0.128847	0.627707	0.487621	0.808038	0.0001773	1	1	0.0003013	1	1	D H03AA Thyroid hormones	C	p1yr
C09CA	1195	123	358901	34241	-0.391624	0.11629	-0.493491	0.12185	0.610491	0.480795	0.775173	0.0007582	1	1	5.123e-05	1	1	D C09CA Angiotensin II receptor blockers, plain [DG:DG01495]	C	p1yr
C08CA	1066	252	327494	65648	-0.278899	0.086789	-0.160224	0.0881758	0.851953	0.716737	1.01268	0.001311	1	1	0.0692	1	0	D C08CA Dihydropyridine derivatives [DG:DG01928]	C	p1yr
A10BA	1178	140	369828	23314	-0.400572	0.139206	-0.140362	0.1434	0.869044	0.656114	1.15108	0.004008	1	1	0.3277	1	0	D A10BA Biguanides [DG:DG01684]	C	p1yr
S01EE	1295	23	384759	8383	-0.600112	0.265697	-0.597736	0.265875	0.550055	0.326657	0.926233	0.02391	0	0	0.02456	1	1	D S01EE Prostaglandin analogues	C	p1yr
S01ED	1308	10	388022	5120	-0.853004	0.390861	-0.84097	0.390922	0.431292	0.200455	0.927952	0.02908	0	0	0.03146	1	1	D S01ED Beta blocking agents	C	p1yr
R03BA	1278	40	378273	14869	-0.389094	0.185742	-0.353297	0.185973	0.702369	0.487825	1.01127	0.03619	0	0	0.05747	1	0	D R03BA Glucocorticoids	C	p1yr
A10BJ	1309	9	391309	1833	-1.07885	0.518366	-0.906547	0.519811	0.403916	0.145823	1.11881	0.03741	0	0	0.08116	1	0	D A10BJ Glucagon-like peptide-1 receptor (GLP-1) analogues	C	p1yr
C10AA	895	423	17425	9552	-0.422274	0.0757922	-0.282232	0.0790978	0.754099	0.645799	0.880561	2.549e-08	1	1	0.0003601	1	1	D C10AA HMG CoA reductase inhibitors [DG:DG01660]	G	p1yr
A02BC	925	393	17691	9286	-0.353462	0.0724149	-0.267273	0.0735047	0.765464	0.662758	0.884087	1.061e-06	1	1	0.0002773	1	1	D A02BC Proton pump inhibitors [DG:DG01646]	G	p1yr
C09AA	1132	186	22656	4321	-0.386733	0.100173	-0.335947	0.10563	0.714661	0.58101	0.879055	0.0001133	1	1	0.001472	1	1	D C09AA ACE inhibitors, plain [DG:DG01501]	G	p1yr
H03AA	1237	81	24575	2402	-0.40879	0.13289	-0.351387	0.133309	0.703711	0.541897	0.913844	0.002099	1	1	0.008396	1	1	D H03AA Thyroid hormones	G	p1yr
C09CA	1208	110	24281	2696	-0.330825	0.122655	-0.333881	0.127156	0.716139	0.558158	0.918835	0.006997	0	1	0.00865	1	1	D C09CA Angiotensin II receptor blockers, plain [DG:DG01495]	G	p1yr
C07AB	1132	186	22972	4005	-0.271937	0.107139	-0.0732651	0.110661	0.929354	0.748139	1.15446	0.01115	0	0	0.5079	1	0	D C07AB Beta blocking agents, selective	G	p1yr
S01EE	1298	20	26322	655	-0.72335	0.291172	-0.682747	0.291645	0.505227	0.285251	0.894841	0.01299	0	0	0.01924	1	1	D S01EE Prostaglandin analogues	G	p1yr
C08CA	1103	215	22493	4484	-0.229813	0.0929402	-0.0823178	0.0954997	0.920979	0.76376	1.11056	0.01342	0	0	0.3887	1	0	D C08CA Dihydropyridine derivatives [DG:DG01928]	G	p1yr
S01ED	1309	9	26576	401	-0.94924	0.406913	-0.905939	0.407644	0.404162	0.181783	0.898582	0.01967	0	0	0.02627	1	1	D S01ED Beta blocking agents	G	p1yr
G04CB	1286	32	26132	845	-0.520371	0.235326	-0.434601	0.235959	0.647523	0.407753	1.02828	0.02702	0	0	0.06551	1	0	D G04CB Testosterone-5-alpha reductase inhibitors	G	p1yr
B01AC	1112	206	23000	3977	-0.232442	0.106266	0.0437522	0.113537	1.04472	0.836285	1.30511	0.02872	0	0	0.7	1	0	D B01AC Platelet aggregation inhibitors excl. heparin	G	p1yr
C10AA	854	464	1746	794	-0.69099	0.0943172	-0.628044	0.0970752	0.533635	0.441151	0.645507	2.871e-13	1	1	1.106e-10	1	1	D C10AA HMG CoA reductase inhibitors [DG:DG01660]	A	p1yr
R03BA	1278	40	2418	122	-0.74423	0.220465	-0.713622	0.222525	0.489867	0.316668	0.757794	0.0007435	1	1	0.001353	1	1	D R03BA Glucocorticoids	A	p1yr
C09AA	1098	220	2172	368	-0.385028	0.118341	-0.200941	0.122577	0.81796	0.643223	1.04017	0.00115	1	1	0.1012	1	0	D C09AA ACE inhibitors, plain [DG:DG01501]	A	p1yr
A02BC	862	456	1748	792	-0.257357	0.0846289	-0.164878	0.0862285	0.847997	0.716099	1.00419	0.002374	1	1	0.05594	1	0	D A02BC Proton pump inhibitors [DG:DG01646]	A	p1yr
S01EE	1295	23	2494	46	-0.809775	0.319461	-0.744485	0.325884	0.474979	0.250723	0.899819	0.01129	0	0	0.0224	1	1	D S01EE Prostaglandin analogues	A	p1yr
A10BA	1178	140	2367	173	-0.444842	0.184637	-0.138559	0.191983	0.870612	0.597525	1.26851	0.01603	0	0	0.4705	1	0	D A10BA Biguanides [DG:DG01684]	A	p1yr
H03AA	1234	84	2353	187	-0.369555	0.157201	-0.315937	0.159041	0.729106	0.533791	0.995886	0.01878	0	0	0.04705	1	1	D H03AA Thyroid hormones	A	p1yr
C08CA	1066	252	2159	381	-0.259785	0.110699	-0.067145	0.115056	0.93506	0.746229	1.17167	0.01899	0	0	0.5595	1	0	D C08CA Dihydropyridine derivatives [DG:DG01928]	A	p1yr
C09CA	1195	123	2338	202	-0.348106	0.14914	-0.248102	0.159067	0.780281	0.571229	1.06584	0.01964	0	0	0.1189	1	0	D C09CA Angiotensin II receptor blockers, plain [DG:DG01495]	A	p1yr
S01ED	1308	10	2516	24	-0.941519	0.467088	-0.800264	0.470948	0.44921	0.178423	1.13096	0.0439	0	0	0.08935	1	0	D S01ED Beta blocking agents	A	p1yr
C10AA	91	79	255620	137522	-0.683237	0.197109	-0.680971	0.197147	0.506125	0.343911	0.744853	0.0005277	1	1	0.0005521	1	1	D C10AA HMG CoA reductase inhibitors [DG:DG01660]	D	p1yr
C09AA	135	35	331703	61439	-0.55436	0.242455	-0.463305	0.24522	0.6292	0.389096	1.01747	0.02223	0	0	0.05885	1	0	D C09AA ACE inhibitors, plain [DG:DG01501]	D	p1yr
C08CA	133	37	327494	65648	-0.462721	0.232403	-0.392607	0.233926	0.675294	0.426947	1.0681	0.04648	0	0	0.09328	1	0	D C08CA Dihydropyridine derivatives [DG:DG01928]	D	p1yr
C09AA	3270	588	331703	61439	-0.230727	0.0531087	-0.198902	0.053817	0.81963	0.737579	0.910808	1.397e-05	1	1	0.0002191	1	1	D C09AA ACE inhibitors, plain [DG:DG01501]	E	p1yr
C10AA	2600	1258	255620	137522	-0.180994	0.0420699	-0.157653	0.0425582	0.854146	0.78579	0.928449	1.691e-05	1	1	0.0002119	1	1	D C10AA HMG CoA reductase inhibitors [DG:DG01660]	E	p1yr
H03AA	3587	271	359009	34133	-0.217739	0.0658626	-0.213238	0.065891	0.807964	0.710076	0.919345	0.0009466	1	1	0.001211	1	1	D H03AA Thyroid hormones	E	p1yr
A10AE	3821	37	390087	3055	-0.528652	0.230525	-0.492355	0.230657	0.611185	0.388898	0.960527	0.02183	0	0	0.0328	1	1	D A10AE Insulins and analogues for injection, long-acting	E	p1yr
C09CA	3533	325	358901	34241	-0.142405	0.0671113	-0.209878	0.0699954	0.810683	0.706758	0.92989	0.03384	0	0	0.002714	1	1	D C09CA Angiotensin II receptor blockers, plain [DG:DG01495]	E	p1yr
J07BB	3629	229	23649	3328	-0.664476	0.0747113	-0.48361	0.0658245	0.616554	0.541925	0.70146	6.214e-19	1	1	2.078e-13	1	1	D J07BB Influenza vaccines	F	p1yr
A02BC	2610	1248	15851	11126	-0.26503	0.0395101	-0.168856	0.0420254	0.844631	0.777846	0.91715	2.008e-11	1	1	5.885e-05	1	1	D A02BC Proton pump inhibitors [DG:DG01646]	F	p1yr
G03CA	3679	179	25257	1720	-0.397705	0.0784991	-0.350566	0.0790314	0.70429	0.603222	0.822291	4.078e-07	1	1	9.206e-06	1	1	D G03CA Natural and semisynthetic estrogens, plain	F	p1yr
N03AX	3593	265	24621	2356	-0.3512	0.0794964	-0.210768	0.0813703	0.809962	0.690557	0.950014	1e-05	1	1	0.009596	1	1	D N03AX Other antiepileptics	F	p1yr
N02AX	3753	105	25926	1051	-0.465822	0.123557	-0.300822	0.125464	0.740209	0.578835	0.946573	0.0001635	1	1	0.01651	1	1	D N02AX Other opioids	F	p1yr
J01MA	3821	37	26450	527	-0.709829	0.193237	-0.607979	0.194636	0.54445	0.371773	0.797332	0.0002398	1	1	0.001788	1	1	D J01MA Fluoroquinolones [DG:DG01549]	F	p1yr
C05AX	3805	53	26390	587	-0.582456	0.159032	-0.504295	0.159744	0.603931	0.441578	0.825975	0.0002502	1	1	0.001596	1	1	D C05AX Other agents for treatment of hemorrhoids and anal fissures for topical use	F	p1yr
R05DA	3668	190	25218	1759	-0.30051	0.086928	-0.178831	0.0882349	0.836247	0.703438	0.99413	0.000547	1	1	0.0427	1	1	D R05DA Opium alkaloids and derivatives	F	p1yr
M01AE	3600	258	24862	2115	-0.230299	0.0676519	-0.0827467	0.0713524	0.920584	0.800435	1.05877	0.0006645	1	1	0.2462	1	0	D M01AE Propionic acid derivatives	F	p1yr
C07AB	3406	452	22562	4415	-0.222498	0.0660707	-0.184073	0.066644	0.831875	0.73001	0.947955	0.0007592	1	1	0.005748	1	1	D C07AB Beta blocking agents, selective	F	p1yr
S01XA	3669	189	24852	2125	-0.267089	0.0860213	-0.208343	0.0865524	0.811928	0.685238	0.962042	0.001905	1	1	0.01608	1	1	D S01XA Other ophthalmologicals	F	p1yr
N06AA	3602	256	24659	2318	-0.23194	0.0749852	-0.105658	0.0766559	0.899732	0.774214	1.0456	0.001982	1	1	0.1681	1	0	D N06AA Non-selective monoamine reuptake inhibitors [DG:DG01730]	F	p1yr
L02AE	3838	20	26647	330	-0.888432	0.287763	-0.863949	0.288192	0.421494	0.239592	0.7415	0.002021	1	1	0.002721	1	1	D L02AE Gonadotropin releasing hormone analogues	F	p1yr
H03AA	3587	271	24401	2576	-0.211849	0.0701008	-0.183944	0.0704283	0.831982	0.724708	0.955136	0.002513	0	1	0.009011	1	1	D H03AA Thyroid hormones	F	p1yr
B03AA	3706	152	25530	1447	-0.306574	0.106501	-0.201064	0.107762	0.81786	0.662138	1.01021	0.003997	0	1	0.06208	1	0	D B03AA Iron bivalent, oral preparations	F	p1yr
A09AA	3853	5	26808	169	-1.40972	0.492226	-1.21138	0.493155	0.297786	0.11327	0.782881	0.004187	0	1	0.01404	1	1	D A09AA Enzyme preparations	F	p1yr
J07CA	3831	27	26709	268	-0.574266	0.201116						0.004301	0	1		1		D J07CA Bacterial and viral vaccines, combined	F	p1yr
A12AX	3498	360	23570	3407	-0.192145	0.067389	-0.0999097	0.068278	0.904919	0.79157	1.0345	0.004357	0	1	0.1434	1	0	D A12AX Calcium, combinations with vitamin D and/or other drugs	F	p1yr
J07AL	3840	18	26744	233	-0.687357	0.246475	-0.47788	0.248502	0.620096	0.381001	1.00924	0.005294	0	1	0.05448	1	0	D J07AL Pneumococcal vaccines	F	p1yr
J01EA	3782	76	26112	865	-0.369297	0.134616	-0.260803	0.135724	0.770433	0.590476	1.00524	0.006085	0	1	0.05467	1	0	D J01EA Trimethoprim and derivatives [DG:DG01581]	F	p1yr
A10AE	3821	37	26578	399	-0.65571	0.242619	-0.598321	0.244066	0.549734	0.340718	0.886973	0.006883	0	1	0.01423	1	1	D A10AE Insulins and analogues for injection, long-acting	F	p1yr
A03FA	3821	37	26543	434	-0.490001	0.190487	-0.294922	0.192049	0.74459	0.51102	1.08492	0.01011	0	0	0.1246	1	0	D A03FA Propulsives [DG:DG01763]	F	p1yr
G04CB	3778	80	26001	976	-0.357892	0.139982	-0.305199	0.1406	0.736977	0.559462	0.970817	0.01057	0	0	0.02996	1	1	D G04CB Testosterone-5-alpha reductase inhibitors	F	p1yr
J01XX	3851	7	26830	147	-1.33864	0.523567	-1.10231	0.527416	0.332104	0.118119	0.933748	0.01057	0	0	0.03662	1	1	D J01XX Other antibacterials	F	p1yr
S01ED	3824	34	26522	455	-0.499068	0.19853	-0.49043	0.199583	0.612363	0.414112	0.905526	0.01195	0	0	0.014	1	1	D S01ED Beta blocking agents	F	p1yr
A02BA	3761	97	25933	1044	-0.303443	0.120946	-0.160896	0.122181	0.85138	0.670068	1.08175	0.01212	0	0	0.1879	1	0	D A02BA H2-receptor antagonists [DG:DG01481]	F	p1yr
L02BA	3849	9	26853	124	-0.811831	0.333057	-0.79853	0.334376	0.44999	0.233652	0.866634	0.01479	0	0	0.01694	1	1	D L02BA Anti-estrogens	F	p1yr
L01BC	3845	13	26718	259	-0.658799	0.275264	-0.633668	0.27603	0.530642	0.308912	0.911524	0.0167	0	0	0.0217	1	1	D L01BC Pyrimidine analogues	F	p1yr
C09AA	3270	588	22100	4877	-0.131864	0.0559725	-0.0932941	0.0569096	0.910926	0.814778	1.01842	0.01849	0	0	0.1012	1	0	D C09AA ACE inhibitors, plain [DG:DG01501]	F	p1yr
B01AB	3843	15	26777	200	-0.700031	0.29722	-0.558763	0.298341	0.571916	0.318694	1.02634	0.01852	0	0	0.06109	1	0	D B01AB Heparin group	F	p1yr
B01AC	3362	496	22455	4522	-0.153966	0.0654507	-0.0480716	0.0681434	0.953065	0.833905	1.08925	0.01866	0	0	0.4805	1	0	D B01AC Platelet aggregation inhibitors excl. heparin	F	p1yr
S01BA	3842	16	26706	271	-0.632446	0.270046	-0.594745	0.271167	0.551703	0.324249	0.938712	0.01919	0	0	0.02829	1	1	D S01BA Corticosteroids, plain	F	p1yr
R03DC	3821	37	26591	386	-0.468675	0.200886	-0.36705	0.202157	0.692775	0.466132	1.02962	0.01965	0	0	0.06943	1	0	D R03DC Leukotriene receptor antagonists	F	p1yr
C09CA	3533	325	23977	3000	-0.166214	0.0713223	-0.137284	0.0718955	0.871722	0.757143	1.00364	0.01979	0	0	0.05621	1	0	D C09CA Angiotensin II receptor blockers, plain [DG:DG01495]	F	p1yr
S01EC	3835	23	26619	358	-0.521655	0.239042	-0.490969	0.240224	0.612033	0.382197	0.980081	0.0291	0	0	0.04098	1	1	D S01EC Carbonic anhydrase inhibitors	F	p1yr
S03BA	3850	8	26846	131	-0.809437	0.374422	-0.802816	0.375885	0.448065	0.214474	0.936069	0.03064	0	0	0.0327	1	1	D S03BA Corticosteroids	F	p1yr
A06AC	3839	19	26702	275	-0.557851	0.25976	-0.399887	0.260922	0.670396	0.402	1.11799	0.03176	0	0	0.1254	1	0	D A06AC Bulk-forming laxatives	F	p1yr
A11EX	3846	12	26798	179	-0.762488	0.356614	-0.640961	0.358474	0.526786	0.260909	1.0636	0.03251	0	0	0.07378	1	0	D A11EX Vitamin B-complex, other combinations	F	p1yr
C08DB	3827	31	26546	431	-0.484388	0.228486	-0.478009	0.229263	0.620017	0.395591	0.971762	0.03401	0	0	0.03708	1	1	D C08DB Benzothiazepine derivatives	F	p1yr
N02CX	3850	8	26883	94	-0.885815	0.419583	-0.808811	0.421058	0.445388	0.195128	1.01662	0.03476	0	0	0.05475	1	0	D N02CX Other antimigraine preparations	F	p1yr
B01AF	3632	226	24705	2272	-0.174785	0.0856339	-0.0709205	0.0891626	0.931536	0.78217	1.10942	0.04125	0	0	0.4264	1	0	D B01AF Direct factor Xa inhibitors	F	p1yr
J01DB	3814	44	26516	461	-0.382951	0.193542	-0.203089	0.196841	0.816206	0.554935	1.20049	0.04786	0	0	0.3022	1	0	D J01DB First-generation cephalosporins [DG:DG01774]	F	p1yr
C03DA	3804	54	26367	610	-0.346989	0.175809	-0.217125	0.178819	0.804829	0.566875	1.14267	0.04843	0	0	0.2247	1	0	D C03DA Aldosterone antagonists	F	p1yr
D02AC	3790	68	26256	721	-0.286651	0.145308	-0.231151	0.146316	0.793619	0.595748	1.05721	0.04854	0	0	0.1142	1	0	D D02AC Soft paraffin and fat products	F	p1yr
C10AA	821	497	249370	143772	-0.70364	0.0750709	-0.609212	0.0769463	0.543779	0.467655	0.632295	7.085e-21	1	1	2.432e-15	1	1	D C10AA HMG CoA reductase inhibitors [DG:DG01660]	C	p2yr
C09AA	1074	244	327125	66017	-0.461719	0.0899305	-0.431777	0.0960093	0.649354	0.53797	0.7838	2.835e-07	1	1	6.886e-06	1	1	D C09AA ACE inhibitors, plain [DG:DG01501]	C	p2yr
H03AA	1233	85	358601	34541	-0.485569	0.128112	-0.472934	0.12828	0.623171	0.484635	0.801308	0.0001505	1	1	0.0002272	1	1	D H03AA Thyroid hormones	C	p2yr
C08CA	1034	284	321678	71464	-0.246055	0.0836509	-0.124674	0.0852712	0.882784	0.746915	1.04337	0.003267	1	1	0.1437	1	0	D C08CA Dihydropyridine derivatives [DG:DG01928]	C	p2yr
C09CA	1177	141	357251	35891	-0.319795	0.111023	-0.403571	0.116579	0.667931	0.531494	0.839391	0.003971	1	1	0.0005367	1	1	D C09CA Angiotensin II receptor blockers, plain [DG:DG01495]	C	p2yr
A10BA	1165	153	368443	24699	-0.37883	0.137289	-0.139525	0.141667	0.869772	0.658897	1.14813	0.005792	1	1	0.3247	1	0	D A10BA Biguanides [DG:DG01684]	C	p2yr
S01EE	1294	24	383778	9364	-0.641363	0.256602	-0.64195	0.256732	0.526265	0.318181	0.870434	0.01244	0	1	0.0124	1	1	D S01EE Prostaglandin analogues	C	p2yr
R03BA	1264	54	374491	18651	-0.330699	0.162808	-0.300546	0.163024	0.740414	0.537908	1.01916	0.04223	0	0	0.06525	1	0	D R03BA Glucocorticoids	C	p2yr
C10AA	821	497	15850	11127	-0.467026	0.0738902	-0.339414	0.0762093	0.712188	0.61337	0.826926	2.645e-10	1	1	8.473e-06	1	1	D C10AA HMG CoA reductase inhibitors [DG:DG01660]	G	p2yr
A02BC	789	529	14288	12689	-0.392392	0.0652227	-0.323568	0.0658735	0.723562	0.635919	0.823285	1.808e-09	1	1	9.067e-07	1	1	D A02BC Proton pump inhibitors [DG:DG01646]	G	p2yr
J07BB	1161	157	22138	4839	-0.461479	0.0964526	-0.456806	0.0963155	0.633303	0.524354	0.76489	1.723e-06	1	1	2.118e-06	1	1	D J07BB Influenza vaccines	G	p2yr
C09AA	1074	244	21582	5395	-0.345995	0.0908644	-0.29675	0.0953744	0.74323	0.616505	0.896003	0.0001405	1	1	0.001864	1	1	D C09AA ACE inhibitors, plain [DG:DG01501]	G	p2yr
H03AA	1233	85	24385	2592	-0.446214	0.130116	-0.387498	0.13061	0.678753	0.525451	0.876782	0.0006059	1	1	0.003011	1	1	D H03AA Thyroid hormones	G	p2yr
G03CA	1256	62	24712	2265	-0.411647	0.135777	-0.37035	0.136114	0.690493	0.528803	0.901622	0.002433	0	1	0.006515	1	1	D G03CA Natural and semisynthetic estrogens, plain	G	p2yr
C09CA	1177	141	23739	3238	-0.326529	0.113221	-0.315768	0.117287	0.729229	0.579461	0.917706	0.00393	0	1	0.007101	1	1	D C09CA Angiotensin II receptor blockers, plain [DG:DG01495]	G	p2yr
S01EE	1294	24	26139	838	-0.736073	0.26034	-0.725509	0.260939	0.484078	0.290265	0.807304	0.004697	0	1	0.005433	1	1	D S01EE Prostaglandin analogues	G	p2yr
C07AB	1092	226	22219	4758	-0.274006	0.100166	-0.0855739	0.103271	0.917985	0.74977	1.12394	0.006232	0	0	0.4073	1	0	D C07AB Beta blocking agents, selective	G	p2yr
C08CA	1034	284	21145	5832	-0.231561	0.0848057	-0.0859675	0.0873221	0.917624	0.773273	1.08892	0.006328	0	0	0.3249	1	0	D C08CA Dihydropyridine derivatives [DG:DG01928]	G	p2yr
B01AC	1061	257	21956	5021	-0.254558	0.0983952	0.018395	0.104735	1.01857	0.829534	1.25067	0.009684	0	0	0.8606	1	0	D B01AC Platelet aggregation inhibitors excl. heparin	G	p2yr
N02AX	1252	66	25430	1547	-0.403063	0.159438	-0.304094	0.160711	0.737791	0.538431	1.01097	0.01148	0	0	0.05848	1	0	D N02AX Other opioids	G	p2yr
R03BA	1264	54	25467	1510	-0.403857	0.164918	-0.346842	0.165784	0.706917	0.510795	0.978341	0.01434	0	0	0.03644	1	1	D R03BA Glucocorticoids	G	p2yr
S01ED	1304	14	26470	507	-0.801618	0.336631	-0.596607	0.344824	0.550677	0.280136	1.08249	0.01726	0	0	0.08361	1	0	D S01ED Beta blocking agents	G	p2yr
A03AA	1298	20	26290	687	-0.59961	0.261809	-0.513393	0.262874	0.598462	0.357493	1.00185	0.02201	0	0	0.05083	1	0	D A03AA Synthetic anticholinergics, esters with tertiary amino group	G	p2yr
S01XA	1207	111	24332	2645	-0.258788	0.120133	-0.159311	0.121302	0.852731	0.672289	1.08161	0.03123	0	0	0.1891	1	0	D S01XA Other ophthalmologicals	G	p2yr
J07CA	1295	23	26262	715	-0.479275	0.223322	-0.473002	0.22386	0.623129	0.401809	0.966354	0.03187	0	0	0.03462	1	1	D J07CA Bacterial and viral vaccines, combined	G	p2yr
C08DB	1306	12	26484	493	-0.752198	0.354085	-0.634592	0.355867	0.530152	0.26392	1.06495	0.03365	0	0	0.07456	1	0	D C08DB Benzothiazepine derivatives	G	p2yr
G04CB	1275	43	25897	1080	-0.422462	0.198871	-0.368349	0.199624	0.691876	0.467843	1.02319	0.03365	0	0	0.06502	1	0	D G04CB Testosterone-5-alpha reductase inhibitors	G	p2yr
C10AA	821	497	1693	847	-0.72123	0.0935003	-0.642067	0.0975964	0.526204	0.434564	0.637169	1.548e-14	1	1	5.385e-11	1	1	D C10AA HMG CoA reductase inhibitors [DG:DG01660]	A	p2yr
C09AA	1074	244	2135	405	-0.39423	0.114589	-0.202254	0.119408	0.816888	0.646383	1.03237	0.0005871	1	1	0.09038	1	0	D C09AA ACE inhibitors, plain [DG:DG01501]	A	p2yr
A02BC	789	529	1583	957	-0.261787	0.0798213	-0.16686	0.0812874	0.846318	0.721638	0.992538	0.001049	1	1	0.04017	1	1	D A02BC Proton pump inhibitors [DG:DG01646]	A	p2yr
R03BA	1264	54	2394	146	-0.59194	0.195209	-0.559637	0.197314	0.571416	0.388102	0.841318	0.002443	0	1	0.004588	1	1	D R03BA Glucocorticoids	A	p2yr
A10BA	1165	153	2348	192	-0.510116	0.181613	-0.188571	0.189039	0.828142	0.571668	1.19968	0.004998	0	1	0.3186	1	0	D A10BA Biguanides [DG:DG01684]	A	p2yr
S01EE	1294	24	2491	49	-0.777727	0.309639	-0.700913	0.315773	0.496132	0.267132	0.921444	0.01206	0	0	0.0265	1	1	D S01EE Prostaglandin analogues	A	p2yr
N07CA	1288	30	2482	58	-0.688281	0.289741	-0.695423	0.295873	0.498863	0.279289	0.891064	0.01757	0	0	0.0188	1	1	D N07CA Antivertigo preparations	A	p2yr
C08CA	1034	284	2120	420	-0.253879	0.107009	-0.0591621	0.111849	0.942554	0.756956	1.17366	0.01772	0	0	0.5969	1	0	D C08CA Dihydropyridine derivatives [DG:DG01928]	A	p2yr
H03AA	1233	85	2352	188	-0.362387	0.156603	-0.299366	0.158292	0.741288	0.543508	1.01104	0.02072	0	0	0.05867	1	0	D H03AA Thyroid hormones	A	p2yr
C09CA	1177	141	2326	214	-0.323074	0.144582	-0.207048	0.154209	0.812981	0.600863	1.09998	0.02551	0	0	0.1795	1	0	D C09CA Angiotensin II receptor blockers, plain [DG:DG01495]	A	p2yr
M02AC	1316	2	2528	12	-2.39937	1.19793	-2.21021	1.1965	0.109678	0.0105036	1.14525	0.04526	0	0	0.06479	1	0	D M02AC Preparations with salicylic acid derivatives	A	p2yr
C10AA	86	84	249370	143772	-0.694608	0.197566	-0.67583	0.197993	0.508734	0.345111	0.749934	0.0004384	1	1	0.0006416	1	1	D C10AA HMG CoA reductase inhibitors [DG:DG01660]	D	p2yr
J07BB	160	10	342364	50778	-1.05023	0.357483	-1.18673	0.357696	0.305219	0.151405	0.615296	0.003305	1	1	0.0009077	1	1	D J07BB Influenza vaccines	D	p2yr
C09AA	131	39	327125	66017	-0.528387	0.233934	-0.437631	0.236821	0.645564	0.405841	1.02689	0.0239	0	0	0.06461	1	0	D C09AA ACE inhibitors, plain [DG:DG01501]	D	p2yr
R01AD	160	10	354259	38883	-0.819468	0.400261	-0.785028	0.400486	0.456107	0.208052	0.999913	0.04063	0	0	0.04997	1	1	D R01AD Corticosteroids	D	p2yr
A10BA	152	18	368443	24699	-0.786474	0.391425	-0.641874	0.395665	0.526305	0.242352	1.14296	0.04451	0	0	0.1047	1	0	D A10BA Biguanides [DG:DG01684]	D	p2yr
C09AA	3209	649	327125	66017	-0.207374	0.0513484	-0.178359	0.0520354	0.836642	0.755522	0.926472	5.379e-05	1	1	0.0006089	1	1	D C09AA ACE inhibitors, plain [DG:DG01501]	E	p2yr
C10AA	2514	1344	249370	143772	-0.14982	0.0415283	-0.1215	0.0420567	0.885591	0.81552	0.961684	0.000309	1	1	0.003866	1	1	D C10AA HMG CoA reductase inhibitors [DG:DG01660]	E	p2yr
H03AA	3585	273	358601	34541	-0.225512	0.0656614	-0.220994	0.0656923	0.801721	0.704865	0.911887	0.0005938	1	1	0.0007681	1	1	D H03AA Thyroid hormones	E	p2yr
J07BB	3484	374	342364	50778	-0.19039	0.0569614	-0.270212	0.0560983	0.763218	0.68375	0.851922	0.0008305	1	1	1.46e-06	1	1	D J07BB Influenza vaccines	E	p2yr
A10AE	3816	42	389850	3292	-0.443401	0.214439	-0.405543	0.214584	0.666615	0.437744	1.01515	0.03867	0	0	0.05877	1	0	D A10AE Insulins and analogues for injection, long-acting	E	p2yr
J07CA	3777	81	382676	10466	-0.21593	0.107107	-0.207829	0.107117	0.812346	0.65851	1.00212	0.0438	0	0	0.05236	1	0	D J07CA Bacterial and viral vaccines, combined	E	p2yr
J07BB	3484	374	22138	4839	-0.503063	0.059567	-0.438043	0.059525	0.645298	0.574236	0.725153	3.163e-17	1	1	1.899e-13	1	1	D J07BB Influenza vaccines	F	p2yr
A02BC	2372	1486	14288	12689	-0.221975	0.0373918	-0.138716	0.0383491	0.870476	0.807444	0.938427	2.943e-09	1	1	0.0002983	1	1	D A02BC Proton pump inhibitors [DG:DG01646]	F	p2yr
G03CA	3615	243	24712	2265	-0.36021	0.0691184	-0.313252	0.0695304	0.731066	0.637925	0.837805	1.885e-07	1	1	6.654e-06	1	1	D G03CA Natural and semisynthetic estrogens, plain	F	p2yr
N03AX	3525	333	24025	2952	-0.315644	0.0702976	-0.197493	0.0723764	0.820786	0.71223	0.945887	7.145e-06	1	1	0.006362	1	1	D N03AX Other antiepileptics	F	p2yr
A03FA	3806	52	26276	701	-0.665652	0.161244	-0.489813	0.162596	0.612741	0.445522	0.842721	3.665e-05	1	1	0.002593	1	1	D A03FA Propulsives [DG:DG01763]	F	p2yr
J01MA	3775	83	26014	963	-0.527391	0.130588	-0.447722	0.131333	0.639082	0.494039	0.826709	5.39e-05	1	1	0.0006527	1	1	D J01MA Fluoroquinolones [DG:DG01549]	F	p2yr
C05AX	3753	105	25921	1056	-0.447728	0.111663	-0.354884	0.112519	0.701255	0.562466	0.87429	6.096e-05	1	1	0.001612	1	1	D C05AX Other agents for treatment of hemorrhoids and anal fissures for topical use	F	p2yr
C07AB	3375	483	22219	4758	-0.250781	0.064075	-0.221759	0.0644732	0.801108	0.706008	0.909019	9.103e-05	1	1	0.0005834	1	1	D C07AB Beta blocking agents, selective	F	p2yr
N02AX	3699	159	25430	1547	-0.380996	0.0987436	-0.216671	0.100798	0.805195	0.660843	0.981078	0.0001143	1	1	0.0316	1	1	D N02AX Other opioids	F	p2yr
N06AA	3498	360	23773	3204	-0.231503	0.0635029	-0.116356	0.0653207	0.890158	0.783184	1.01174	0.0002673	1	1	0.07487	1	0	D N06AA Non-selective monoamine reuptake inhibitors [DG:DG01730]	F	p2yr
R05DA	3529	329	24113	2864	-0.227422	0.0671042	-0.123184	0.0682517	0.884101	0.773399	1.01065	0.0007021	1	1	0.07111	1	0	D R05DA Opium alkaloids and derivatives	F	p2yr
L02AE	3834	24	26592	385	-0.87045	0.263888	-0.823596	0.264275	0.438851	0.261431	0.736677	0.0009729	1	1	0.001832	1	1	D L02AE Gonadotropin releasing hormone analogues	F	p2yr
J07AL	3821	37	26541	436	-0.535441	0.169536	-0.31738	0.171863	0.728054	0.519838	1.01967	0.001589	1	1	0.0648	1	0	D J07AL Pneumococcal vaccines	F	p2yr
H03AA	3585	273	24385	2592	-0.210696	0.0698886	-0.187076	0.0701955	0.829381	0.722771	0.951715	0.002574	0	1	0.007701	1	1	D H03AA Thyroid hormones	F	p2yr
A09AA	3853	5	26801	176	-1.46913	0.491689	-1.29149	0.492827	0.27486	0.104616	0.722144	0.002811	0	1	0.008782	1	1	D A09AA Enzyme preparations	F	p2yr
J07CA	3777	81	26262	715	-0.338569	0.114285						0.003054	0	1		1		D J07CA Bacterial and viral vaccines, combined	F	p2yr
C05AE	3849	9	26820	157	-1.10207	0.373554	-0.901949	0.374771	0.405778	0.194657	0.845875	0.003178	0	1	0.0161	1	1	D C05AE Muscle relaxants	F	p2yr
S01XA	3601	257	24332	2645	-0.206798	0.075642	-0.146616	0.0761362	0.863626	0.743902	1.00262	0.006262	0	0	0.05415	1	0	D S01XA Other ophthalmologicals	F	p2yr
M01AB	3825	33	26656	321	-0.519332	0.190083	-0.361535	0.191877	0.696606	0.47825	1.01466	0.006296	0	0	0.05955	1	0	D M01AB Acetic acid derivatives and related substances	F	p2yr
A03AA	3795	63	26290	687	-0.372282	0.138264	-0.267422	0.139545	0.76535	0.582204	1.00611	0.007095	0	0	0.05532	1	0	D A03AA Synthetic anticholinergics, esters with tertiary amino group	F	p2yr
S01EC	3833	25	26574	403	-0.600993	0.229556	-0.620002	0.229906	0.537943	0.342793	0.844191	0.008847	0	0	0.007006	1	1	D S01EC Carbonic anhydrase inhibitors	F	p2yr
A06AX	3839	19	26669	308	-0.679485	0.259874	-0.479192	0.261776	0.619284	0.370729	1.03448	0.008936	0	0	0.06718	1	0	D A06AX Other drugs for constipation	F	p2yr
A06AC	3829	29	26594	383	-0.572503	0.22342	-0.399461	0.224549	0.670681	0.431889	1.0415	0.0104	0	0	0.07526	1	0	D A06AC Bulk-forming laxatives	F	p2yr
J01EA	3705	153	25412	1565	-0.239134	0.0947701	-0.112575	0.0960887	0.89353	0.740142	1.07871	0.01163	0	0	0.2414	1	0	D J01EA Trimethoprim and derivatives [DG:DG01581]	F	p2yr
G04CB	3765	93	25897	1080	-0.32432	0.129876	-0.278531	0.130467	0.756895	0.586108	0.977447	0.01252	0	0	0.03278	1	1	D G04CB Testosterone-5-alpha reductase inhibitors	F	p2yr
A10AE	3816	42	26549	428	-0.562531	0.226553	-0.502631	0.227726	0.604937	0.387134	0.945276	0.01303	0	0	0.02731	1	1	D A10AE Insulins and analogues for injection, long-acting	F	p2yr
N01BX	3835	23	26658	319	-0.616079	0.249106	-0.505942	0.250451	0.602937	0.369045	0.985065	0.0134	0	0	0.04338	1	1	D N01BX Other local anesthetics	F	p2yr
C09AA	3209	649	21582	5395	-0.133528	0.054097	-0.0958817	0.0549684	0.908571	0.815771	1.01193	0.01358	0	0	0.08112	1	0	D C09AA ACE inhibitors, plain [DG:DG01501]	F	p2yr
C09CA	3503	355	23739	3238	-0.167637	0.0693287	-0.131746	0.0698884	0.876564	0.76435	1.00525	0.01561	0	0	0.05943	1	0	D C09CA Angiotensin II receptor blockers, plain [DG:DG01495]	F	p2yr
H02AB	3378	480	22832	4145	-0.141098	0.0592779	-0.0473397	0.0602259	0.953763	0.847567	1.07327	0.01731	0	0	0.4319	1	0	D H02AB Glucocorticoids	F	p2yr
L02BA	3845	13	26815	162	-0.648094	0.274143	-0.620915	0.275473	0.537453	0.313219	0.922215	0.01808	0	0	0.0242	1	1	D L02BA Anti-estrogens	F	p2yr
R03AC	3250	608	22189	4788	-0.142487	0.0605276	-0.0812615	0.0610813	0.921953	0.817926	1.03921	0.01857	0	0	0.1834	1	0	D R03AC Selective beta-2-adrenoreceptor agonists	F	p2yr
J01CR	3664	194	25284	1693	-0.203589	0.0874563	-0.0900183	0.0884339	0.913914	0.768471	1.08689	0.01992	0	0	0.3087	1	0	D J01CR Combinations of penicillins, incl. beta-lactamase inhibitors	F	p2yr
C01BC	3850	8	26812	165	-0.901711	0.387685	-0.782449	0.389716	0.457285	0.213033	0.981581	0.02003	0	0	0.04468	1	1	D C01BC Antiarrhythmics, class Ic [DG:DG01650]	F	p2yr
A03AX	3830	28	26633	344	-0.496015	0.214626	-0.361847	0.215747	0.696389	0.456248	1.06293	0.02084	0	0	0.09352	1	0	D A03AX Other drugs for functional gastrointestinal disorders	F	p2yr
B01AC	3304	554	21956	5021	-0.144063	0.0626062	-0.0408642	0.0651815	0.95996	0.844828	1.09078	0.02139	0	0	0.5307	1	0	D B01AC Platelet aggregation inhibitors excl. heparin	F	p2yr
B01AF	3618	240	24557	2420	-0.189355	0.0830265	-0.08036	0.086547	0.922784	0.778804	1.09338	0.02258	0	0	0.3531	1	0	D B01AF Direct factor Xa inhibitors	F	p2yr
A04AA	3847	11	26788	189	-0.746772	0.328702	-0.438011	0.333233	0.645319	0.335826	1.24004	0.0231	0	0	0.1887	1	0	D A04AA Serotonin (5HT3) antagonists	F	p2yr
J07AP	3820	38	26631	346	-0.364335	0.160444	-0.173967	0.168368	0.840325	0.604124	1.16888	0.02317	0	0	0.3015	1	0	D J07AP Typhoid vaccines	F	p2yr
S01ED	3817	41	26470	507	-0.401292	0.178196	-0.421821	0.178706	0.655851	0.462045	0.93095	0.02433	0	0	0.01826	1	1	D S01ED Beta blocking agents	F	p2yr
D06AX	3755	103	26050	927	-0.252245	0.11392	-0.191465	0.114497	0.825749	0.659758	1.0335	0.02682	0	0	0.09449	1	0	D D06AX Other antibiotics for topical use	F	p2yr
M01AE	3378	480	23469	3508	-0.112951	0.0517255	0.018992	0.0555319	1.01917	0.914066	1.13637	0.02899	0	0	0.7324	1	0	D M01AE Propionic acid derivatives	F	p2yr
A06AD	3387	471	22899	4078	-0.131861	0.0605898	0.0285054	0.0625331	1.02892	0.910226	1.16308	0.02954	0	0	0.6485	1	0	D A06AD Osmotically acting laxatives	F	p2yr
A12AX	3427	431	23057	3920	-0.133789	0.0619397	-0.0472244	0.0627555	0.953873	0.843473	1.07872	0.03078	0	0	0.4517	1	0	D A12AX Calcium, combinations with vitamin D and/or other drugs	F	p2yr
L01BC	3819	39	26435	542	-0.363868	0.169041	-0.32743	0.169647	0.720773	0.51688	1.0051	0.03136	0	0	0.05361	1	0	D L01BC Pyrimidine analogues	F	p2yr
S01BC	3853	5	26879	98	-1.25034	0.586371	-1.23463	0.58722	0.290941	0.0920329	0.919744	0.03299	0	0	0.03552	1	1	D S01BC Antiinflammatory agents, non-steroids	F	p2yr
A07EC	3820	38	26567	410	-0.388917	0.183458	-0.357438	0.18398	0.699466	0.487704	1.00318	0.03402	0	0	0.05205	1	0	D A07EC Aminosalicylic acid and similar agents	F	p2yr
J07BC	3838	20	26766	211	-0.438476	0.211932	-0.178611	0.220632	0.836431	0.542775	1.28896	0.03856	0	0	0.4182	1	0	D J07BC Hepatitis vaccines	F	p2yr
V07AY	3583	275	24783	2194	-0.163076	0.0816164	-0.0902353	0.0822164	0.913716	0.777725	1.07349	0.04572	0	0	0.2724	1	0	D V07AY Other non-therapeutic auxiliary products	F	p2yr
C08DB	3822	36	26484	493	-0.409238	0.206678	-0.390461	0.207384	0.676745	0.450705	1.01615	0.0477	0	0	0.05974	1	0	D C08DB Benzothiazepine derivatives	F	p2yr
N05CF	3720	138	25770	1207	-0.196137	0.0992317	-0.0709913	0.100419	0.93147	0.765047	1.13409	0.0481	0	0	0.4796	1	0	D N05CF Benzodiazepine related drugs	F	p2yr
J07BB	160	10	22138	4839	-1.35686	0.359992	-1.39748	0.360166	0.24722	0.122038	0.500808	0.0001642	1	1	0.0001047	1	1	D J07BB Influenza vaccines	H	p2yr
R01AD	160	10	23534	3443	-0.942393	0.40261	-0.930903	0.402135	0.394197	0.179226	0.867015	0.01925	0	0	0.02063	1	1	D R01AD Corticosteroids	H	p2yr
G04CB	164	6	25897	1080	-1.18309	0.585712	-1.17065	0.586383	0.310167	0.0982749	0.978921	0.0434	0	0	0.0459	1	1	D G04CB Testosterone-5-alpha reductase inhibitors	H	p2yr
C10AA	86	84	15850	11127	-0.386775	0.194782	-0.3687	0.195505	0.691633	0.47147	1.01461	0.04708	0	0	0.05932	1	0	D C10AA HMG CoA reductase inhibitors [DG:DG01660]	H	p2yr
C10AA	744	574	237935	155207	-0.560475	0.0735486	-0.491738	0.0749544	0.611562	0.528006	0.708341	2.533e-14	1	1	5.37e-11	1	1	D C10AA HMG CoA reductase inhibitors [DG:DG01660]	C	p5yr
C09AA	1005	313	316247	76895	-0.352677	0.0834334	-0.320021	0.087814	0.726134	0.611321	0.862511	2.368e-05	1	1	0.0002682	1	1	D C09AA ACE inhibitors, plain [DG:DG01501]	C	p5yr
H03AA	1232	86	358061	35081	-0.496625	0.127662	-0.487202	0.127797	0.614343	0.478222	0.78921	0.0001002	1	1	0.0001377	1	1	D H03AA Thyroid hormones	C	p5yr
A10BA	1143	175	365792	27350	-0.392638	0.13718	-0.224105	0.14133	0.799231	0.605859	1.05432	0.004207	1	1	0.1128	1	0	D A10BA Biguanides [DG:DG01684]	C	p5yr
C09CA	1153	165	353839	39303	-0.277539	0.105377	-0.320594	0.109132	0.725718	0.585969	0.898796	0.008444	1	1	0.003307	1	1	D C09CA Angiotensin II receptor blockers, plain [DG:DG01495]	C	p5yr
S01EE	1287	31	381566	11576	-0.551533	0.22187	-0.562526	0.22198	0.569768	0.368764	0.880336	0.01293	0	1	0.01127	1	1	D S01EE Prostaglandin analogues	C	p5yr
S01ED	1303	15	386366	6776	-0.705415	0.315344	-0.50127	0.333178	0.605761	0.315282	1.16387	0.02529	0	0	0.1325	1	0	D S01ED Beta blocking agents	C	p5yr
C08CA	967	351	310104	83038	-0.175898	0.0790492	-0.0631839	0.08128	0.938771	0.800523	1.10089	0.02607	0	0	0.4369	1	0	D C08CA Dihydropyridine derivatives [DG:DG01928]	C	p5yr
C10AA	744	574	14700	12277	-0.376959	0.0723457	-0.277494	0.0741809	0.75768	0.65515	0.876257	1.896e-07	1	1	0.0001838	1	1	D C10AA HMG CoA reductase inhibitors [DG:DG01660]	G	p5yr
J07BB	1090	228	20551	6426	-0.361543	0.0825523	-0.351758	0.0829105	0.703451	0.597939	0.82758	1.193e-05	1	1	2.216e-05	1	1	D J07BB Influenza vaccines	G	p5yr
A02BC	612	706	11283	15694	-0.254098	0.0620616	-0.173248	0.0627168	0.840929	0.743657	0.950925	4.246e-05	1	1	0.005742	1	1	D A02BC Proton pump inhibitors [DG:DG01646]	G	p5yr
G03CA	1226	92	23731	3246	-0.44203	0.117485	-0.402958	0.11783	0.66834	0.530513	0.841975	0.0001686	1	1	0.0006275	1	1	D G03CA Natural and semisynthetic estrogens, plain	G	p5yr
C09AA	1005	313	20408	6569	-0.304547	0.0842192	-0.278611	0.0875143	0.756834	0.637537	0.898455	0.0002996	1	1	0.001456	1	1	D C09AA ACE inhibitors, plain [DG:DG01501]	G	p5yr
H03AA	1232	86	24351	2626	-0.450029	0.129637	-0.411338	0.130069	0.662763	0.513616	0.855219	0.0005184	1	1	0.001566	1	1	D H03AA Thyroid hormones	G	p5yr
A03AA	1278	40	25655	1322	-0.608422	0.188877	-0.551066	0.18971	0.576335	0.397362	0.835917	0.001278	1	1	0.003678	1	1	D A03AA Synthetic anticholinergics, esters with tertiary amino group	G	p5yr
C09CA	1153	165	23302	3675	-0.316171	0.107556	-0.297234	0.110388	0.74287	0.598338	0.922315	0.003289	0	1	0.007093	1	1	D C09CA Angiotensin II receptor blockers, plain [DG:DG01495]	G	p5yr
S01EE	1287	31	25941	1036	-0.641052	0.225353	-0.644504	0.225895	0.524923	0.337136	0.817309	0.004449	0	0	0.004333	1	1	D S01EE Prostaglandin analogues	G	p5yr
S01ED	1303	15	26358	619	-0.883224	0.318897	-0.894435	0.319651	0.408839	0.2185	0.764982	0.005616	0	0	0.005143	1	1	D S01ED Beta blocking agents	G	p5yr
C08CA	967	351	19950	7027	-0.200535	0.0800276	-0.0781794	0.0830168	0.924799	0.785923	1.08821	0.01222	0	0	0.3463	1	0	D C08CA Dihydropyridine derivatives [DG:DG01928]	G	p5yr
G04CB	1268	50	25705	1272	-0.467346	0.186503	-0.421247	0.187045	0.656228	0.454815	0.946836	0.01222	0	0	0.02432	1	1	D G04CB Testosterone-5-alpha reductase inhibitors	G	p5yr
R03BA	1227	91	24722	2255	-0.312036	0.133416	-0.255792	0.134127	0.774303	0.595301	1.00713	0.01935	0	0	0.05652	1	0	D R03BA Glucocorticoids	G	p5yr
C05AX	1223	95	24782	2195	-0.288872	0.123623	-0.22019	0.124267	0.802367	0.628915	1.02365	0.01946	0	0	0.07642	1	0	D C05AX Other agents for treatment of hemorrhoids and anal fissures for topical use	G	p5yr
B01AC	991	327	20790	6187	-0.210636	0.0917811	-0.0125915	0.0968339	0.987487	0.816776	1.19388	0.02174	0	0	0.8965	1	0	D B01AC Platelet aggregation inhibitors excl. heparin	G	p5yr
J07CA	1240	78	24839	2138	-0.266595	0.120506	-0.260509	0.120763	0.770659	0.608225	0.976473	0.02695	0	0	0.031	1	1	D J07CA Bacterial and viral vaccines, combined	G	p5yr
J07AL	1294	24	26224	753	-0.475458	0.225542	-0.315564	0.228813	0.729378	0.465777	1.14216	0.03503	0	0	0.1679	1	0	D J07AL Pneumococcal vaccines	G	p5yr
C07AB	1048	270	21591	5386	-0.192178	0.0940904	-0.0396765	0.0970139	0.9611	0.79467	1.16239	0.04111	0	0	0.6826	1	0	D C07AB Beta blocking agents, selective	G	p5yr
C05AE	1307	11	26614	363	-0.721892	0.361652	-0.657001	0.362842	0.518404	0.254568	1.05568	0.04593	0	0	0.0702	1	0	D C05AE Muscle relaxants	G	p5yr
R03DC	1296	22	26347	630	-0.524884	0.263907	-0.440189	0.264641	0.643915	0.383315	1.08168	0.04672	0	0	0.09625	1	0	D R03DC Leukotriene receptor antagonists	G	p5yr
C10AA	744	574	1617	923	-0.610507	0.0912542	-0.581241	0.092732	0.559204	0.466242	0.670701	2.552e-11	1	1	4.063e-10	1	1	D C10AA HMG CoA reductase inhibitors [DG:DG01660]	A	p5yr
C09AA	1005	313	2051	489	-0.335908	0.106704	-0.216004	0.109735	0.805732	0.649762	0.999142	0.001656	0	1	0.04909	1	1	D C09AA ACE inhibitors, plain [DG:DG01501]	A	p5yr
A10BA	1143	175	2336	204	-0.427385	0.179837	-0.178816	0.186298	0.836259	0.580382	1.20495	0.01753	0	0	0.3372	1	0	D A10BA Biguanides [DG:DG01684]	A	p5yr
H03AA	1232	86	2350	190	-0.369785	0.156021	-0.340342	0.156869	0.711527	0.523145	0.967745	0.01783	0	0	0.0301	1	1	D H03AA Thyroid hormones	A	p5yr
S01EE	1287	31	2480	60	-0.628169	0.272663	-0.585582	0.276709	0.556782	0.32365	0.957843	0.02129	0	0	0.03439	1	1	D S01EE Prostaglandin analogues	A	p5yr
A03AA	1278	40	2440	100	-0.50172	0.219954	-0.480693	0.221572	0.618355	0.400475	0.954772	0.0226	0	0	0.03011	1	1	D A03AA Synthetic anticholinergics, esters with tertiary amino group	A	p5yr
A02BC	612	706	1267	1273	-0.16672	0.075021	-0.104208	0.0759915	0.901038	0.776316	1.0458	0.02632	0	0	0.1704	1	0	D A02BC Proton pump inhibitors [DG:DG01646]	A	p5yr
C09CA	1153	165	2303	237	-0.279049	0.137816	-0.203656	0.143069	0.815743	0.616217	1.07987	0.04296	0	0	0.1547	1	0	D C09CA Angiotensin II receptor blockers, plain [DG:DG01495]	A	p5yr
C10AA	86	84	249370	143772	-0.694608	0.197566	-0.67583	0.197993	0.508734	0.345111	0.749934	0.0004384	1	1	0.0006416	1	1	D C10AA HMG CoA reductase inhibitors [DG:DG01660]	D	p5yr
J07BB	160	10	342364	50778	-1.05023	0.357483	-1.18673	0.357696	0.305219	0.151405	0.615296	0.003305	1	1	0.0009077	1	1	D J07BB Influenza vaccines	D	p5yr
C09AA	131	39	327125	66017	-0.528387	0.233934	-0.437631	0.236821	0.645564	0.405841	1.02689	0.0239	0	0	0.06461	1	0	D C09AA ACE inhibitors, plain [DG:DG01501]	D	p5yr
R01AD	160	10	354259	38883	-0.819468	0.400261	-0.785028	0.400486	0.456107	0.208052	0.999913	0.04063	0	0	0.04997	1	1	D R01AD Corticosteroids	D	p5yr
A10BA	152	18	368443	24699	-0.786474	0.391425	-0.641874	0.395665	0.526305	0.242352	1.14296	0.04451	0	0	0.1047	1	0	D A10BA Biguanides [DG:DG01684]	D	p5yr
J07BB	3320	538	321673	71469	-0.179992	0.0487667	-0.1926	0.0494908	0.824812	0.748563	0.908828	0.0002235	1	1	9.959e-05	1	1	D J07BB Influenza vaccines	E	p5yr
H03AA	3582	276	358061	35081	-0.234233	0.0653727	-0.233507	0.0653817	0.791752	0.696524	0.9	0.0003397	1	1	0.0003551	1	1	D H03AA Thyroid hormones	E	p5yr
J07AL	3793	65	382801	10341	-0.35866	0.123947	-0.260685	0.12592	0.770524	0.602008	0.986211	0.003808	1	1	0.03843	1	1	D J07AL Pneumococcal vaccines	E	p5yr
C09AA	3056	802	316247	76895	-0.135621	0.0481385	-0.12989	0.0481817	0.878192	0.799056	0.965166	0.004843	1	1	0.007022	1	1	D C09AA ACE inhibitors, plain [DG:DG01501]	E	p5yr
J07AP	3743	115	378194	14948	-0.207825	0.0900303	-0.173674	0.0902976	0.840571	0.704227	1.00331	0.02098	0	0	0.05444	1	0	D J07AP Typhoid vaccines	E	p5yr
C10AB	3837	21	390666	2476	-0.633914	0.287013	-0.628731	0.287023	0.533268	0.30383	0.935968	0.0272	0	0	0.02849	1	1	D C10AB Fibrates	E	p5yr
C10AA	2361	1497	237935	155207	-0.0852664	0.0408115	-0.0639317	0.0414021	0.938069	0.864954	1.01736	0.03668	0	0	0.1225	1	0	D C10AA HMG CoA reductase inhibitors [DG:DG01660]	E	p5yr
S01EC	3825	33	387931	5211	-0.389253	0.191552	-0.393492	0.191553	0.674697	0.463509	0.982108	0.04214	0	0	0.03995	1	1	D S01EC Carbonic anhydrase inhibitors	E	p5yr
J07CA	3585	273	359745	33397	-0.116978	0.0592778	-0.109417	0.0593015	0.896356	0.798	1.00684	0.04845	0	0	0.06502	1	0	D J07CA Bacterial and viral vaccines, combined	E	p5yr
J07BB	3320	538	20551	6426	-0.424227	0.0512668	-0.332496	0.0528235	0.717132	0.646597	0.795361	1.337e-16	1	1	3.126e-10	1	1	D J07BB Influenza vaccines	F	p5yr
G03CA	3494	364	23731	3246	-0.314955	0.0596114	-0.252891	0.0602468	0.776552	0.69006	0.873886	1.276e-07	1	1	2.705e-05	1	1	D G03CA Natural and semisynthetic estrogens, plain	F	p5yr
J01MA	3676	182	25105	1872	-0.37796	0.0870837	-0.264537	0.0883263	0.767561	0.645545	0.91264	1.428e-05	1	1	0.002747	1	1	D J01MA Fluoroquinolones [DG:DG01549]	F	p5yr
J01CR	3516	342	23760	3217	-0.280425	0.0661886	-0.1609	0.0674592	0.851377	0.745931	0.97173	2.274e-05	1	1	0.01708	1	1	D J01CR Combinations of penicillins, incl. beta-lactamase inhibitors	F	p5yr
N03AX	3354	504	22739	4238	-0.235674	0.0575124	-0.109739	0.0611461	0.896068	0.794861	1.01016	4.182e-05	1	1	0.07271	1	0	D N03AX Other antiepileptics	F	p5yr
A03FA	3737	121	25628	1349	-0.418772	0.104629	-0.251901	0.106555	0.777322	0.630808	0.957865	6.283e-05	1	1	0.01808	1	1	D A03FA Propulsives [DG:DG01763]	F	p5yr
C05AX	3603	255	24782	2195	-0.276513	0.0720748	-0.156793	0.0737254	0.854881	0.739858	0.987787	0.0001251	1	1	0.03345	1	1	D C05AX Other agents for treatment of hemorrhoids and anal fissures for topical use	F	p5yr
N02AX	3530	328	24025	2952	-0.264798	0.0691882	-0.129636	0.0721401	0.878415	0.762591	1.01183	0.0001299	1	1	0.07234	1	0	D N02AX Other opioids	F	p5yr
A02BC	1879	1979	11283	15694	-0.135947	0.0355675	-0.0293317	0.0372635	0.971094	0.902696	1.04468	0.0001325	1	1	0.4312	1	0	D A02BC Proton pump inhibitors [DG:DG01646]	F	p5yr
J07AL	3793	65	26224	753	-0.491997	0.129587	-0.301546	0.132275	0.739674	0.570746	0.9586	0.0001469	1	1	0.02263	1	1	D J07AL Pneumococcal vaccines	F	p5yr
J07AP	3743	115	25942	1035	-0.362533	0.0960097	-0.242141	0.101637	0.784945	0.643165	0.957979	0.0001597	1	1	0.01721	1	1	D J07AP Typhoid vaccines	F	p5yr
J07AM	3836	22	26584	393	-0.802824	0.215362	-0.571958	0.217696	0.564419	0.368376	0.864793	0.0001935	1	1	0.00861	1	1	D J07AM Tetanus vaccines	F	p5yr
R05DA	3224	634	21712	5265	-0.179063	0.0502041	-0.0778643	0.0519287	0.92509	0.835565	1.02421	0.0003621	1	1	0.1338	1	0	D R05DA Opium alkaloids and derivatives	F	p5yr
C07AB	3289	569	21591	5386	-0.207175	0.060185	-0.159691	0.0613224	0.852407	0.75587	0.961274	0.0005776	1	1	0.009216	1	1	D C07AB Beta blocking agents, selective	F	p5yr
R03DC	3797	61	26347	630	-0.513457	0.156123	-0.421255	0.158409	0.656223	0.48107	0.895148	0.001007	1	1	0.007835	1	1	D R03DC Leukotriene receptor antagonists	F	p5yr
L02AE	3825	33	26501	476	-0.69015	0.218766	-0.654228	0.219396	0.519843	0.338154	0.799153	0.001608	1	1	0.002866	1	1	D L02AE Gonadotropin releasing hormone analogues	F	p5yr
H02AB	3084	774	20443	6534	-0.148976	0.0484297	-0.027314	0.0514841	0.973056	0.879655	1.07637	0.002099	1	1	0.5957	1	0	D H02AB Glucocorticoids	F	p5yr
H03AA	3582	276	24351	2626	-0.210712	0.0695805	-0.184344	0.0699657	0.831649	0.725075	0.953888	0.002461	0	1	0.008423	1	1	D H03AA Thyroid hormones	F	p5yr
A09AA	3851	7	26776	201	-1.24293	0.411874	-1.09748	0.412843	0.33371	0.148574	0.74954	0.002549	0	1	0.007856	1	1	D A09AA Enzyme preparations	F	p5yr
C05AE	3831	27	26614	363	-0.635122	0.212316	-0.498212	0.214513	0.607616	0.399051	0.925188	0.002779	0	1	0.02021	1	1	D C05AE Muscle relaxants	F	p5yr
S01ED	3814	44	26358	619	-0.501595	0.17024	-0.385448	0.183059	0.680146	0.47509	0.973707	0.003217	0	1	0.03525	1	1	D S01ED Beta blocking agents	F	p5yr
A06AD	3165	693	20918	6059	-0.147996	0.0504742	0.00763191	0.0530559	1.00766	0.908137	1.11809	0.003369	0	1	0.8856	1	0	D A06AD Osmotically acting laxatives	F	p5yr
S01EC	3825	33	26465	512	-0.569322	0.198617	-0.408888	0.213569	0.664389	0.437145	1.00976	0.004154	0	1	0.05556	1	0	D S01EC Carbonic anhydrase inhibitors	F	p5yr
D07AB	3626	232	24868	2109	-0.208722	0.0757864	-0.141014	0.0763424	0.868477	0.747779	1.00866	0.005889	0	1	0.06474	1	0	D D07AB Corticosteroids, moderately potent (group II)	F	p5yr
B03AA	3467	391	23737	3240	-0.181491	0.066163	-0.092897	0.0672233	0.911287	0.79879	1.03963	0.00609	0	1	0.167	1	0	D B03AA Iron bivalent, oral preparations	F	p5yr
B01AB	3808	50	26409	568	-0.461083	0.168393	-0.316818	0.169848	0.728464	0.522189	1.01622	0.006182	0	1	0.06215	1	0	D B01AB Heparin group	F	p5yr
C01BC	3846	12	26749	228	-0.906962	0.331588	-0.76587	0.3341	0.464929	0.24154	0.894921	0.006238	0	1	0.02189	1	1	D C01BC Antiarrhythmics, class Ic [DG:DG01650]	F	p5yr
C09CA	3456	402	23302	3675	-0.177919	0.0664463	-0.132947	0.0671445	0.875511	0.767549	0.99866	0.007419	0	1	0.04771	1	1	D C09CA Angiotensin II receptor blockers, plain [DG:DG01495]	F	p5yr
N06AA	3220	638	21791	5186	-0.131163	0.0492122	-0.00500294	0.052087	0.99501	0.89844	1.10196	0.007697	0	1	0.9235	1	0	D N06AA Non-selective monoamine reuptake inhibitors [DG:DG01730]	F	p5yr
A06AC	3801	57	26300	677	-0.414834	0.155716	-0.255498	0.157561	0.774531	0.568745	1.05478	0.007725	0	1	0.1049	1	0	D A06AC Bulk-forming laxatives	F	p5yr
A03AA	3718	140	25655	1322	-0.250623	0.0942734	-0.12764	0.0958788	0.88017	0.729376	1.06214	0.007854	0	1	0.1831	1	0	D A03AA Synthetic anticholinergics, esters with tertiary amino group	F	p5yr
M01AB	3764	94	26217	760	-0.29928	0.113476	-0.215437	0.114789	0.806189	0.643761	1.0096	0.008359	0	1	0.06055	1	0	D M01AB Acetic acid derivatives and related substances	F	p5yr
N01BB	3635	223	24870	2107	-0.197734	0.0752842	-0.0844863	0.0784844	0.918984	0.787951	1.07181	0.008631	0	1	0.2817	1	0	D N01BB Amides	F	p5yr
C10AB	3837	21	26690	287	-0.774007	0.297491	-0.761524	0.298461	0.466954	0.260144	0.838175	0.009279	0	0	0.01073	1	1	D C10AB Fibrates	F	p5yr
A07AA	3703	155	25594	1383	-0.252709	0.0997541	-0.106082	0.101375	0.899351	0.737285	1.09704	0.0113	0	0	0.2954	1	0	D A07AA Antibiotics	F	p5yr
A11EX	3827	31	26624	353	-0.589465	0.232958	-0.527597	0.234951	0.590021	0.37228	0.935117	0.0114	0	0	0.02474	1	1	D A11EX Vitamin B-complex, other combinations	F	p5yr
N05CF	3602	256	24827	2150	-0.185859	0.0738772	-0.0846016	0.0750597	0.918878	0.793167	1.06451	0.01188	0	0	0.2597	1	0	D N05CF Benzodiazepine related drugs	F	p5yr
D08AC	3840	18	26766	211	-0.73653	0.296093	-0.576341	0.297697	0.561951	0.313537	1.00718	0.01287	0	0	0.05288	1	0	D D08AC Biguanides and amidines	F	p5yr
C09AA	3056	802	20408	6569	-0.123854	0.050683	-0.101023	0.0520439	0.903912	0.816253	1.00099	0.01454	0	0	0.05225	1	0	D C09AA ACE inhibitors, plain [DG:DG01501]	F	p5yr
B01AC	3164	694	20790	6187	-0.140976	0.0583468	-0.0659933	0.0611127	0.936137	0.830459	1.05526	0.01569	0	0	0.2802	1	0	D B01AC Platelet aggregation inhibitors excl. heparin	F	p5yr
G04CB	3743	115	25705	1272	-0.27533	0.116098	-0.204856	0.116835	0.814765	0.648005	1.02444	0.01772	0	0	0.07955	1	0	D G04CB Testosterone-5-alpha reductase inhibitors	F	p5yr
S01EA	3850	8	26812	165	-1.03319	0.439791	-0.615911	0.463817	0.540148	0.217618	1.3407	0.01882	0	0	0.1842	1	0	D S01EA Sympathomimetics in glaucoma therapy	F	p5yr
J07CA	3585	273	24839	2138	-0.147252	0.06389	-0.075097	0.0674456	0.927653	0.812781	1.05876	0.02119	0	0	0.2655	1	0	D J07CA Bacterial and viral vaccines, combined	F	p5yr
L01BC	3773	85	25916	1061	-0.273171	0.118743	-0.221187	0.119426	0.801567	0.634279	1.01298	0.02143	0	0	0.06402	1	0	D L01BC Pyrimidine analogues	F	p5yr
N07BB	3856	2	26922	55	-1.84117	0.804615	-1.775	0.805605	0.169483	0.0349436	0.822028	0.02213	0	0	0.02758	1	1	D N07BB Drugs used in alcohol dependence	F	p5yr
J01XE	3127	731	20697	6280	-0.105933	0.0465035	0.00149135	0.0478293	1.00149	0.911872	1.09992	0.02274	0	0	0.9751	1	0	D J01XE Nitrofuran derivatives	F	p5yr
A07EA	3847	11	26823	154	-0.793481	0.351166	-0.684113	0.353404	0.504538	0.252385	1.00861	0.02386	0	0	0.0529	1	0	D A07EA Corticosteroids acting locally	F	p5yr
J01EE	3835	23	26705	272	-0.558681	0.252506	-0.316622	0.254915	0.728606	0.442079	1.20084	0.02694	0	0	0.2142	1	0	D J01EE Combinations of sulfonamides and trimethoprim, incl. derivatives	F	p5yr
D10AF	3839	19	26806	171	-0.561145	0.253694	-0.496707	0.255313	0.608531	0.368936	1.00372	0.02698	0	0	0.05173	1	0	D D10AF Antiinfectives for treatment of acne	F	p5yr
L02BA	3836	22	26747	230	-0.480365	0.220227	-0.458389	0.221781	0.632301	0.409389	0.976589	0.02917	0	0	0.03876	1	1	D L02BA Anti-estrogens	F	p5yr
A02BA	3598	260	24573	2404	-0.156132	0.0727716	-0.013594	0.0748715	0.986498	0.85185	1.14243	0.03192	0	0	0.8559	1	0	D A02BA H2-receptor antagonists [DG:DG01481]	F	p5yr
B05BB	3856	2	26906	71	-2.31781	1.0955	-2.08476	1.0977	0.124337	0.0144611	1.06905	0.03437	0	0	0.05755	1	0	D B05BB Solutions affecting the electrolyte balance	F	p5yr
J01XX	3842	16	26715	262	-0.614279	0.291572	-0.342382	0.294663	0.710077	0.398545	1.26512	0.03514	0	0	0.2453	1	0	D J01XX Other antibacterials	F	p5yr
L02BB	3843	15	26749	228	-0.608968	0.289822	-0.226276	0.310862	0.797498	0.433624	1.46672	0.03563	0	0	0.4667	1	0	D L02BB Anti-androgens	F	p5yr
J01FA	3258	600	22187	4790	-0.104513	0.0505032	-0.0208858	0.051688	0.979331	0.884974	1.08375	0.03851	0	0	0.6862	1	0	D J01FA Macrolides [DG:DG01551]	F	p5yr
B01AF	3581	277	24310	2667	-0.161337	0.0781329	-0.00703985	0.0826808	0.992985	0.844426	1.16768	0.03894	0	0	0.9321	1	0	D B01AF Direct factor Xa inhibitors	F	p5yr
J01CF	2990	868	20214	6763	-0.0893116	0.0434601	-0.0175657	0.0443813	0.982588	0.900725	1.07189	0.03989	0	0	0.6923	1	0	D J01CF Beta-lactamase resistant penicillins [DG:DG01779]	F	p5yr
R03BA	3574	284	24722	2255	-0.14993	0.0734624	-0.0911634	0.0749727	0.912869	0.788114	1.05737	0.04127	0	0	0.224	1	0	D R03BA Glucocorticoids	F	p5yr
N05AB	3588	270	24495	2482	-0.138754	0.0686308	-0.0465118	0.0695358	0.954553	0.832931	1.09394	0.04321	0	0	0.5036	1	0	D N05AB Phenothiazines with piperazine structure	F	p5yr
C07AA	3738	120	25977	1000	-0.193606	0.0978475	-0.121723	0.0987745	0.885394	0.729552	1.07453	0.04786	0	0	0.2178	1	0	D C07AA Beta blocking agents, non-selective	F	p5yr
N01BX	3788	70	26229	748	-0.276458	0.140183	-0.126283	0.142224	0.881366	0.666945	1.16472	0.04861	0	0	0.3746	1	0	D N01BX Other local anesthetics	F	p5yr
J07BB	147	23	20551	6426	-0.79039	0.250191	-0.803994	0.250448	0.447538	0.273929	0.731175	0.001584	1	1	0.001328	1	1	D J07BB Influenza vaccines	H	p5yr
G04CB	163	7	25705	1272	-1.32819	0.568224	-1.32112	0.568838	0.266835	0.0875035	0.813693	0.01942	0	0	0.02021	1	1	D G04CB Testosterone-5-alpha reductase inhibitors	H	p5yr
D05AX	167	3	25621	1356	-1.95196	0.917821	-1.75952	0.919576	0.172128	0.0283839	1.04383	0.03345	0	0	0.05571	1	0	D D05AX Other antipsoriatics for topical use	H	p5yr
J07BB	1034	284	303160	89982	-0.169588	0.0750606	-0.163506	0.0753098	0.849161	0.732633	0.984225	0.02386	0	0	0.02992	1	1	D J07BB Influenza vaccines	C	p10y
J07CA	1145	173	325108	68034	-0.185938	0.0839763	-0.185828	0.0839877	0.830416	0.704377	0.979009	0.02682	0	0	0.02693	1	1	D J07CA Bacterial and viral vaccines, combined	C	p10y
J07BB	1034	284	19029	7948	-0.379574	0.0766135	-0.311401	0.0799956	0.73242	0.626131	0.856753	7.297e-07	1	1	9.935e-05	1	1	D J07BB Influenza vaccines	G	p10y
J07AL	1253	65	24839	2138	-0.40361	0.137435	-0.214972	0.143153	0.806564	0.60923	1.06781	0.00332	0	1	0.1332	1	0	D J07AL Pneumococcal vaccines	G	p10y
J07CA	1145	173	22409	4568	-0.247498	0.0858446	-0.224685	0.0860935	0.798768	0.674737	0.945598	0.003941	0	0	0.009065	1	1	D J07CA Bacterial and viral vaccines, combined	G	p10y
J07AP	1248	70	24963	2014	-0.30222	0.125577	-0.231662	0.126461	0.793214	0.619073	1.01634	0.01611	0	0	0.06698	1	0	D J07AP Typhoid vaccines	G	p10y
J07BB	160	10	342364	50778	-1.05023	0.357483	-1.18673	0.357696	0.305219	0.151405	0.615296	0.003305	1	1	0.0009077	1	1	D J07BB Influenza vaccines	D	p10y
J07BB	3177	681	303160	89982	-0.190724	0.0446895	-0.14911	0.0472684	0.861474	0.785249	0.945099	1.975e-05	1	1	0.001608	1	1	D J07BB Influenza vaccines	E	p10y
J07AL	3688	170	366548	26594	-0.247006	0.0795102	-0.16438	0.0831543	0.848419	0.720824	0.998601	0.001893	1	1	0.04806	1	1	D J07AL Pneumococcal vaccines	E	p10y
J07AM	3829	29	387493	5649	-0.438222	0.181949	-0.343555	0.184273	0.709244	0.494245	1.01777	0.01602	0	1	0.06227	1	0	D J07AM Tetanus vaccines	E	p10y
J07AP	3628	230	364435	28707	-0.153182	0.0651927	-0.0565006	0.0699879	0.945066	0.823926	1.08402	0.01879	0	1	0.4195	1	0	D J07AP Typhoid vaccines	E	p10y
J07CA	3276	582	325108	68034	-0.0947669	0.0434021	-0.0545563	0.0460369	0.946905	0.865206	1.03632	0.029	0	0	0.236	1	0	D J07CA Bacterial and viral vaccines, combined	E	p10y
J07BB	3177	681	19029	7948	-0.406926	0.0470885	-0.296833	0.0500902	0.743168	0.673672	0.819833	5.799e-18	1	1	3.137e-09	1	1	D J07BB Influenza vaccines	F	p10y
J07AL	3688	170	24839	2138	-0.407418	0.0830612	-0.215981	0.0872187	0.805751	0.679137	0.95597	9.388e-07	1	1	0.01328	1	1	D J07AL Pneumococcal vaccines	F	p10y
J07AP	3628	230	24963	2014	-0.268409	0.0697129	-0.114058	0.0752958	0.892206	0.769787	1.03409	0.0001183	1	1	0.1298	1	0	D J07AP Typhoid vaccines	F	p10y
J07AM	3829	29	26495	482	-0.707346	0.188038	-0.484428	0.190442	0.616049	0.424135	0.894801	0.0001691	1	1	0.01097	1	1	D J07AM Tetanus vaccines	F	p10y
J07BC	3624	234	25246	1731	-0.145499	0.0696416	0.0387849	0.0779732	1.03955	0.892217	1.2112	0.03669	0	0	0.6189	1	0	D J07BC Hepatitis vaccines	F	p10y
J07BB	137	33	19029	7948	-0.685824	0.219062	-0.688079	0.219486	0.502541	0.32684	0.772692	0.001746	1	1	0.001721	1	1	D J07BB Influenza vaccines	H	p10y

## Sheet: B-DRUG-CTRL-PRO-ONLY-FDR-005
B Controlling for other top protective drugs With FDR<0.05
drug	case_notx	case_tx	ctrl_notx	ctrl_tx	beta1	se1	beta2	se2	OR2	conf.low2	conf.high2	p1	fdr.05	fdr.1	p2	sig1	sig2	Full name	Model	Windows
A02BA	3761	97	25933	1044	-0.303443	0.120946	-0.183284	0.121983	0.832532	0.655489	1.05739	0.01212	0	0	0.133	1	0	D A02BA H2-receptor antagonists [DG:DG01481]	F	p1yr
A02BA	3598	260	24573	2404	-0.156132	0.0727716	-0.036383	0.0744692	0.964271	0.833313	1.11581	0.03192	0	0	0.6252	1	0	D A02BA H2-receptor antagonists [DG:DG01481]	F	p5yr
A02BC	925	393	17691	9286	-0.353462	0.0724149	-0.278226	0.0734156	0.757126	0.655653	0.874303	1.061e-06	1	1	0.0001511	1	1	D A02BC Proton pump inhibitors [DG:DG01646]	G	p6m
A02BC	862	456	1748	792	-0.257357	0.0846289	-0.164878	0.0862285	0.847997	0.716099	1.00419	0.002374	1	1	0.05594	1	0	D A02BC Proton pump inhibitors [DG:DG01646]	A	p1yr
A02BC	612	706	1267	1273	-0.16672	0.075021	-0.110659	0.075889	0.895244	0.771479	1.03886	0.02632	0	0	0.1449	1	0	D A02BC Proton pump inhibitors [DG:DG01646]	A	p5yr
A02BC	1879	1979	11283	15694	-0.135947	0.0355675	-0.0525113	0.0367785	0.948844	0.882851	1.01977	0.0001325	1	1	0.1534	1	0	D A02BC Proton pump inhibitors [DG:DG01646]	F	p5yr
A02BC	925	393	17691	9286	-0.353462	0.0724149	-0.278226	0.0734156	0.757126	0.655653	0.874303	1.061e-06	1	1	0.0001511	1	1	D A02BC Proton pump inhibitors [DG:DG01646]	G	p1yr
A02BC	2610	1248	15851	11126	-0.26503	0.0395101	-0.190754	0.0417458	0.826336	0.761414	0.896792	2.008e-11	1	1	4.91e-06	1	1	D A02BC Proton pump inhibitors [DG:DG01646]	F	p1yr
A02BC	789	529	14288	12689	-0.392392	0.0652227	-0.336281	0.0657807	0.714423	0.628001	0.812737	1.808e-09	1	1	3.206e-07	1	1	D A02BC Proton pump inhibitors [DG:DG01646]	G	p2yr
A02BC	789	529	1583	957	-0.261787	0.0798213	-0.169151	0.0811852	0.844381	0.720131	0.990069	0.001049	1	1	0.03727	1	1	D A02BC Proton pump inhibitors [DG:DG01646]	A	p2yr
A02BC	2372	1486	14288	12689	-0.221975	0.0373918	-0.147622	0.0383039	0.862757	0.800355	0.930024	2.943e-09	1	1	0.0001165	1	1	D A02BC Proton pump inhibitors [DG:DG01646]	F	p2yr
A02BC	612	706	11283	15694	-0.254098	0.0620616	-0.181156	0.0626858	0.834305	0.737844	0.943378	4.246e-05	1	1	0.003857	1	1	D A02BC Proton pump inhibitors [DG:DG01646]	G	p5yr
A03AA	3718	140	25655	1322	-0.250623	0.0942734	-0.145179	0.0953576	0.864867	0.717427	1.04261	0.007854	0	1	0.1279	1	0	D A03AA Synthetic anticholinergics, esters with tertiary amino group	F	p5yr
A03AA	1298	20	26290	687	-0.59961	0.261809	-0.51781	0.262583	0.595824	0.356121	0.996871	0.02201	0	0	0.04862	1	1	D A03AA Synthetic anticholinergics, esters with tertiary amino group	G	p2yr
A03AA	3795	63	26290	687	-0.372282	0.138264	-0.275011	0.139373	0.759564	0.577996	0.998167	0.007095	0	0	0.04848	1	1	D A03AA Synthetic anticholinergics, esters with tertiary amino group	F	p2yr
A03AA	1278	40	25655	1322	-0.608422	0.188877	-0.551056	0.189698	0.576341	0.397376	0.835906	0.001278	1	1	0.003676	1	1	D A03AA Synthetic anticholinergics, esters with tertiary amino group	G	p5yr
A03AA	1278	40	2440	100	-0.50172	0.219954	-0.483436	0.221345	0.616661	0.399556	0.951733	0.0226	0	0	0.02902	1	1	D A03AA Synthetic anticholinergics, esters with tertiary amino group	A	p5yr
A03AX	3830	28	26633	344	-0.496015	0.214626	-0.375918	0.215614	0.686659	0.44999	1.0478	0.02084	0	0	0.08126	1	0	D A03AX Other drugs for functional gastrointestinal disorders	F	p2yr
A03FA	3821	37	26543	434	-0.490001	0.190487	-0.329927	0.191734	0.718976	0.493746	1.04695	0.01011	0	0	0.08531	1	0	D A03FA Propulsives [DG:DG01763]	F	p1yr
A03FA	3806	52	26276	701	-0.665652	0.161244	-0.523725	0.162347	0.59231	0.430877	0.814225	3.665e-05	1	1	0.001257	1	1	D A03FA Propulsives [DG:DG01763]	F	p2yr
A03FA	3737	121	25628	1349	-0.418772	0.104629	-0.301985	0.10583	0.739349	0.600847	0.909778	6.283e-05	1	1	0.004327	1	1	D A03FA Propulsives [DG:DG01763]	F	p5yr
A04AA	3847	11	26788	189	-0.746772	0.328702	-0.471087	0.332934	0.624323	0.32509	1.19899	0.0231	0	0	0.1571	1	0	D A04AA Serotonin (5HT3) antagonists	F	p2yr
A06AC	3839	19	26702	275	-0.557851	0.25976	-0.398333	0.260641	0.671438	0.402846	1.11911	0.03176	0	0	0.1265	1	0	D A06AC Bulk-forming laxatives	F	p1yr
A06AC	3829	29	26594	383	-0.572503	0.22342	-0.409371	0.224307	0.664068	0.427833	1.03074	0.0104	0	0	0.068	1	0	D A06AC Bulk-forming laxatives	F	p2yr
A06AC	3801	57	26300	677	-0.414834	0.155716	-0.280464	0.156591	0.755433	0.555776	1.02681	0.007725	0	1	0.07329	1	0	D A06AC Bulk-forming laxatives	F	p5yr
A06AD	3387	471	22899	4078	-0.131861	0.0605898	0.0205889	0.0624399	1.0208	0.903214	1.1537	0.02954	0	0	0.7416	1	0	D A06AD Osmotically acting laxatives	F	p2yr
A06AD	3165	693	20918	6059	-0.147996	0.0504742	-0.0144066	0.0526417	0.985697	0.889064	1.09283	0.003369	0	1	0.7843	1	0	D A06AD Osmotically acting laxatives	F	p5yr
A06AX	3839	19	26669	308	-0.679485	0.259874	-0.487524	0.261518	0.614145	0.367839	1.02538	0.008936	0	0	0.0623	1	0	D A06AX Other drugs for constipation	F	p2yr
A07AA	3703	155	25594	1383	-0.252709	0.0997541	-0.128265	0.101044	0.87962	0.721577	1.07228	0.0113	0	0	0.2043	1	0	D A07AA Antibiotics	F	p5yr
A07EA	3847	11	26823	154	-0.793481	0.351166	-0.694208	0.353052	0.49947	0.250023	0.997791	0.02386	0	0	0.04927	1	1	D A07EA Corticosteroids acting locally	F	p5yr
A07EC	3820	38	26567	410	-0.388917	0.183458	-0.358834	0.183912	0.69849	0.487088	1.00164	0.03402	0	0	0.05105	1	0	D A07EC Aminosalicylic acid and similar agents	F	p2yr
A09AA	3853	5	26808	169	-1.40972	0.492226	-1.26998	0.492905	0.280836	0.106875	0.737957	0.004187	0	1	0.009984	1	1	D A09AA Enzyme preparations	F	p1yr
A09AA	3853	5	26801	176	-1.46913	0.491689	-1.28946	0.49282	0.275419	0.104831	0.723602	0.002811	0	1	0.008888	1	1	D A09AA Enzyme preparations	F	p2yr
A09AA	3851	7	26776	201	-1.24293	0.411874	-1.1006	0.412926	0.332672	0.148088	0.747333	0.002549	0	1	0.007695	1	1	D A09AA Enzyme preparations	F	p5yr
A10AE	3821	37	390087	3055	-0.528652	0.230525	-0.492355	0.230657	0.611185	0.388898	0.960527	0.02183	0	0	0.0328	1	1	D A10AE Insulins and analogues for injection, long-acting	E	p1yr
A10AE	3816	42	389850	3292	-0.443401	0.214439	-0.405543	0.214584	0.666615	0.437744	1.01515	0.03867	0	0	0.05877	1	0	D A10AE Insulins and analogues for injection, long-acting	E	p2yr
A10AE	3821	37	26578	399	-0.65571	0.242619	-0.629333	0.243222	0.532947	0.330861	0.858467	0.006883	0	1	0.009673	1	1	D A10AE Insulins and analogues for injection, long-acting	F	p1yr
A10AE	3816	42	26549	428	-0.562531	0.226553	-0.531411	0.22709	0.587775	0.376621	0.917314	0.01303	0	0	0.01929	1	1	D A10AE Insulins and analogues for injection, long-acting	F	p2yr
A10BA	1178	140	369828	23314	-0.400572	0.139206	-0.140362	0.1434	0.869044	0.656114	1.15108	0.004008	1	1	0.3277	1	0	D A10BA Biguanides [DG:DG01684]	C	p1yr
A10BA	1178	140	2367	173	-0.444842	0.184637	-0.138559	0.191983	0.870612	0.597525	1.26851	0.01603	0	0	0.4705	1	0	D A10BA Biguanides [DG:DG01684]	A	p1yr
A10BA	1165	153	368443	24699	-0.37883	0.137289	-0.139431	0.141624	0.869853	0.659015	1.14814	0.005792	1	1	0.3249	1	0	D A10BA Biguanides [DG:DG01684]	C	p2yr
A10BA	1165	153	2348	192	-0.510116	0.181613	-0.195945	0.188698	0.822057	0.567847	1.19007	0.004998	0	1	0.2991	1	0	D A10BA Biguanides [DG:DG01684]	A	p2yr
A10BA	152	18	368443	24699	-0.786474	0.391425	-0.641874	0.395665	0.526305	0.242352	1.14296	0.04451	0	0	0.1047	1	0	D A10BA Biguanides [DG:DG01684]	D	p2yr
A10BA	1143	175	365792	27350	-0.392638	0.13718	-0.223409	0.14125	0.799788	0.606376	1.05489	0.004207	1	1	0.1137	1	0	D A10BA Biguanides [DG:DG01684]	C	p5yr
A10BA	1143	175	2336	204	-0.427385	0.179837	-0.217298	0.184943	0.80469	0.559957	1.15638	0.01753	0	0	0.2401	1	0	D A10BA Biguanides [DG:DG01684]	A	p5yr
A10BA	152	18	368443	24699	-0.786474	0.391425	-0.641874	0.395665	0.526305	0.242352	1.14296	0.04451	0	0	0.1047	1	0	D A10BA Biguanides [DG:DG01684]	D	p5yr
A10BJ	1309	9	391309	1833	-1.07885	0.518366	-0.906547	0.519811	0.403916	0.145823	1.11881	0.03741	0	0	0.08116	1	0	D A10BJ Glucagon-like peptide-1 receptor (GLP-1) analogues	C	p1yr
A11EX	3846	12	26798	179	-0.762488	0.356614	-0.685002	0.357606	0.504089	0.250093	1.01605	0.03251	0	0	0.05544	1	0	D A11EX Vitamin B-complex, other combinations	F	p1yr
A11EX	3827	31	26624	353	-0.589465	0.232958	-0.543321	0.234257	0.580816	0.366971	0.919277	0.0114	0	0	0.02038	1	1	D A11EX Vitamin B-complex, other combinations	F	p5yr
A12AX	3498	360	23570	3407	-0.192145	0.067389	-0.113125	0.0681231	0.893039	0.781415	1.02061	0.004357	0	1	0.09681	1	0	D A12AX Calcium, combinations with vitamin D and/or other drugs	F	p1yr
A12AX	3427	431	23057	3920	-0.133789	0.0619397	-0.0533154	0.0626931	0.948081	0.838453	1.07204	0.03078	0	0	0.3951	1	0	D A12AX Calcium, combinations with vitamin D and/or other drugs	F	p2yr
B01AB	3843	15	26777	200	-0.700031	0.29722	-0.58658	0.298011	0.556226	0.310152	0.997538	0.01852	0	0	0.04904	1	1	D B01AB Heparin group	F	p1yr
B01AB	3808	50	26409	568	-0.461083	0.168393	-0.336925	0.169466	0.713962	0.512177	0.995246	0.006182	0	1	0.0468	1	1	D B01AB Heparin group	F	p5yr
B01AC	1112	206	23000	3977	-0.232442	0.106266	0.0202658	0.113159	1.02047	0.817478	1.27387	0.02872	0	0	0.8579	1	0	D B01AC Platelet aggregation inhibitors excl. heparin	G	p6m
B01AC	1112	206	23000	3977	-0.232442	0.106266	0.0202658	0.113159	1.02047	0.817478	1.27387	0.02872	0	0	0.8579	1	0	D B01AC Platelet aggregation inhibitors excl. heparin	G	p1yr
B01AC	3362	496	22455	4522	-0.153966	0.0654507	-0.0534824	0.0680328	0.947923	0.829585	1.08314	0.01866	0	0	0.4318	1	0	D B01AC Platelet aggregation inhibitors excl. heparin	F	p1yr
B01AC	1061	257	21956	5021	-0.254558	0.0983952	-0.00245636	0.104465	0.997547	0.812846	1.22422	0.009684	0	0	0.9812	1	0	D B01AC Platelet aggregation inhibitors excl. heparin	G	p2yr
B01AC	3304	554	21956	5021	-0.144063	0.0626062	-0.0405265	0.065151	0.960284	0.845163	1.09108	0.02139	0	0	0.5339	1	0	D B01AC Platelet aggregation inhibitors excl. heparin	F	p2yr
B01AC	991	327	20790	6187	-0.210636	0.0917811	-0.0285564	0.0967246	0.971847	0.804012	1.17472	0.02174	0	0	0.7678	1	0	D B01AC Platelet aggregation inhibitors excl. heparin	G	p5yr
B01AC	3164	694	20790	6187	-0.140976	0.0583468	-0.0689942	0.0607986	0.933332	0.828481	1.05145	0.01569	0	0	0.2565	1	0	D B01AC Platelet aggregation inhibitors excl. heparin	F	p5yr
B01AF	3632	226	24705	2272	-0.174785	0.0856339	-0.0817802	0.0890406	0.921474	0.773907	1.09718	0.04125	0	0	0.3584	1	0	D B01AF Direct factor Xa inhibitors	F	p1yr
B01AF	3618	240	24557	2420	-0.189355	0.0830265	-0.0813802	0.0864841	0.921843	0.778106	1.09213	0.02258	0	0	0.3467	1	0	D B01AF Direct factor Xa inhibitors	F	p2yr
B01AF	3581	277	24310	2667	-0.161337	0.0781329	-0.0571106	0.0814819	0.94449	0.805076	1.10804	0.03894	0	0	0.4834	1	0	D B01AF Direct factor Xa inhibitors	F	p5yr
B03AA	3706	152	25530	1447	-0.306574	0.106501	-0.206057	0.107533	0.813787	0.659135	1.00472	0.003997	0	1	0.05535	1	0	D B03AA Iron bivalent, oral preparations	F	p1yr
B03AA	3467	391	23737	3240	-0.181491	0.066163	-0.101229	0.0670079	0.903726	0.792497	1.03057	0.00609	0	1	0.1309	1	0	D B03AA Iron bivalent, oral preparations	F	p5yr
B05BB	3856	2	26906	71	-2.31781	1.0955	-2.1343	1.09655	0.118328	0.0137932	1.0151	0.03437	0	0	0.05162	1	0	D B05BB Solutions affecting the electrolyte balance	F	p5yr
C01BC	3850	8	26812	165	-0.901711	0.387685	-0.78124	0.389701	0.457838	0.213297	0.98274	0.02003	0	0	0.045	1	1	D C01BC Antiarrhythmics, class Ic [DG:DG01650]	F	p2yr
C01BC	3846	12	26749	228	-0.906962	0.331588	-0.780718	0.334049	0.458077	0.238004	0.881643	0.006238	0	1	0.01944	1	1	D C01BC Antiarrhythmics, class Ic [DG:DG01650]	F	p5yr
C03DA	3804	54	26367	610	-0.346989	0.175809	-0.239756	0.17865	0.78682	0.554373	1.11673	0.04843	0	0	0.1796	1	0	D C03DA Aldosterone antagonists	F	p1yr
C05AE	3849	9	26820	157	-1.10207	0.373554	-0.897914	0.374749	0.407419	0.195453	0.849259	0.003178	0	1	0.01658	1	1	D C05AE Muscle relaxants	F	p2yr
C05AE	1307	11	26614	363	-0.721892	0.361652	-0.653618	0.36297	0.520161	0.255366	1.05952	0.04593	0	0	0.07175	1	0	D C05AE Muscle relaxants	G	p5yr
C05AE	3831	27	26614	363	-0.635122	0.212316	-0.499782	0.214115	0.606663	0.398736	0.923017	0.002779	0	1	0.01959	1	1	D C05AE Muscle relaxants	F	p5yr
C05AX	3805	53	26390	587	-0.582456	0.159032	-0.508704	0.159614	0.601274	0.439748	0.822132	0.0002502	1	1	0.001439	1	1	D C05AX Other agents for treatment of hemorrhoids and anal fissures for topical use	F	p1yr
C05AX	3753	105	25921	1056	-0.447728	0.111663	-0.378461	0.11221	0.684915	0.549692	0.853403	6.096e-05	1	1	0.0007451	1	1	D C05AX Other agents for treatment of hemorrhoids and anal fissures for topical use	F	p2yr
C05AX	1223	95	24782	2195	-0.288872	0.123623	-0.222343	0.124248	0.800641	0.627585	1.02142	0.01946	0	0	0.07354	1	0	D C05AX Other agents for treatment of hemorrhoids and anal fissures for topical use	G	p5yr
C05AX	3603	255	24782	2195	-0.276513	0.0720748	-0.194658	0.072683	0.823116	0.713823	0.949142	0.0001251	1	1	0.007406	1	1	D C05AX Other agents for treatment of hemorrhoids and anal fissures for topical use	F	p5yr
C07AA	3738	120	25977	1000	-0.193606	0.0978475	-0.139703	0.0985398	0.869616	0.716881	1.05489	0.04786	0	0	0.1563	1	0	D C07AA Beta blocking agents, non-selective	F	p5yr
C07AB	3406	452	22562	4415	-0.222498	0.0660707	-0.191703	0.0665822	0.825552	0.724548	0.940636	0.0007592	1	1	0.00399	1	1	D C07AB Beta blocking agents, selective	F	p1yr
C07AB	3375	483	22219	4758	-0.250781	0.064075	-0.225255	0.0644397	0.798313	0.70359	0.905788	9.103e-05	1	1	0.0004737	1	1	D C07AB Beta blocking agents, selective	F	p2yr
C07AB	1132	186	22972	4005	-0.271937	0.107139	-0.0970322	0.110246	0.907527	0.731163	1.12643	0.01115	0	0	0.3788	1	0	D C07AB Beta blocking agents, selective	G	p6m
C07AB	1132	186	22972	4005	-0.271937	0.107139	-0.0970322	0.110246	0.907527	0.731163	1.12643	0.01115	0	0	0.3788	1	0	D C07AB Beta blocking agents, selective	G	p1yr
C07AB	1092	226	22219	4758	-0.274006	0.100166	-0.111277	0.102767	0.894691	0.731465	1.09434	0.006232	0	0	0.2789	1	0	D C07AB Beta blocking agents, selective	G	p2yr
C07AB	1048	270	21591	5386	-0.192178	0.0940904	-0.0660889	0.0964986	0.936048	0.774738	1.13094	0.04111	0	0	0.4934	1	0	D C07AB Beta blocking agents, selective	G	p5yr
C07AB	3289	569	21591	5386	-0.207175	0.060185	-0.187295	0.0606312	0.829199	0.736287	0.933835	0.0005776	1	1	0.002009	1	1	D C07AB Beta blocking agents, selective	F	p5yr
C08CA	1103	215	22493	4484	-0.229813	0.0929402	-0.105119	0.0950402	0.900218	0.747215	1.08455	0.01342	0	0	0.2687	1	0	D C08CA Dihydropyridine derivatives [DG:DG01928]	G	p6m
C08CA	1066	252	327494	65648	-0.278899	0.086789	-0.160224	0.0881758	0.851953	0.716737	1.01268	0.001311	1	1	0.0692	1	0	D C08CA Dihydropyridine derivatives [DG:DG01928]	C	p1yr
C08CA	1103	215	22493	4484	-0.229813	0.0929402	-0.105119	0.0950402	0.900218	0.747215	1.08455	0.01342	0	0	0.2687	1	0	D C08CA Dihydropyridine derivatives [DG:DG01928]	G	p1yr
C08CA	1066	252	2159	381	-0.259785	0.110699	-0.067145	0.115056	0.93506	0.746229	1.17167	0.01899	0	0	0.5595	1	0	D C08CA Dihydropyridine derivatives [DG:DG01928]	A	p1yr
C08CA	133	37	327494	65648	-0.462721	0.232403	-0.392607	0.233926	0.675294	0.426947	1.0681	0.04648	0	0	0.09328	1	0	D C08CA Dihydropyridine derivatives [DG:DG01928]	D	p1yr
C08CA	1034	284	321678	71464	-0.246055	0.0836509	-0.124748	0.0852785	0.882719	0.74685	1.04331	0.003267	1	1	0.1435	1	0	D C08CA Dihydropyridine derivatives [DG:DG01928]	C	p2yr
C08CA	1034	284	21145	5832	-0.231561	0.0848057	-0.118015	0.0866479	0.888682	0.749875	1.05318	0.006328	0	0	0.1732	1	0	D C08CA Dihydropyridine derivatives [DG:DG01928]	G	p2yr
C08CA	1034	284	2120	420	-0.253879	0.107009	-0.068991	0.111665	0.933335	0.749822	1.16176	0.01772	0	0	0.5367	1	0	D C08CA Dihydropyridine derivatives [DG:DG01928]	A	p2yr
C08CA	967	351	310104	83038	-0.175898	0.0790492	-0.0637008	0.081282	0.938286	0.800106	1.10033	0.02607	0	0	0.4332	1	0	D C08CA Dihydropyridine derivatives [DG:DG01928]	C	p5yr
C08CA	967	351	19950	7027	-0.200535	0.0800276	-0.109167	0.0821358	0.896581	0.76326	1.05319	0.01222	0	0	0.1838	1	0	D C08CA Dihydropyridine derivatives [DG:DG01928]	G	p5yr
C08DB	3827	31	26546	431	-0.484388	0.228486	-0.467727	0.229087	0.626425	0.399817	0.981467	0.03401	0	0	0.04119	1	1	D C08DB Benzothiazepine derivatives	F	p1yr
C08DB	1306	12	26484	493	-0.752198	0.354085	-0.657522	0.355378	0.518134	0.258185	1.03981	0.03365	0	0	0.06429	1	0	D C08DB Benzothiazepine derivatives	G	p2yr
C08DB	3822	36	26484	493	-0.409238	0.206678	-0.380621	0.207263	0.683437	0.45527	1.02595	0.0477	0	0	0.06631	1	0	D C08DB Benzothiazepine derivatives	F	p2yr
C09AA	1132	186	347068	46074	-0.291268	0.0986432	-0.22571	0.101692	0.79795	0.653755	0.973948	0.00315	1	1	0.02645	1	1	D C09AA ACE inhibitors, plain [DG:DG01501]	C	p6m
C09AA	1132	186	22656	4321	-0.386733	0.100173	-0.269153	0.102618	0.764026	0.624821	0.934245	0.0001133	1	1	0.008724	1	1	D C09AA ACE inhibitors, plain [DG:DG01501]	G	p6m
C09AA	1098	220	331703	61439	-0.488408	0.0931624	-0.47571	0.0992975	0.621443	0.511539	0.75496	1.585e-07	1	1	1.662e-06	1	1	D C09AA ACE inhibitors, plain [DG:DG01501]	C	p1yr
C09AA	1132	186	22656	4321	-0.386733	0.100173	-0.269153	0.102618	0.764026	0.624821	0.934245	0.0001133	1	1	0.008724	1	1	D C09AA ACE inhibitors, plain [DG:DG01501]	G	p1yr
C09AA	3270	588	331703	61439	-0.230727	0.0531087	-0.198902	0.053817	0.81963	0.737579	0.910808	1.397e-05	1	1	0.0002191	1	1	D C09AA ACE inhibitors, plain [DG:DG01501]	E	p1yr
C09AA	1074	244	327125	66017	-0.461719	0.0899305	-0.432285	0.0960054	0.649024	0.537701	0.783396	2.835e-07	1	1	6.711e-06	1	1	D C09AA ACE inhibitors, plain [DG:DG01501]	C	p2yr
C09AA	1074	244	21582	5395	-0.345995	0.0908644	-0.241513	0.0927205	0.785438	0.654915	0.941975	0.0001405	1	1	0.009199	1	1	D C09AA ACE inhibitors, plain [DG:DG01501]	G	p2yr
C09AA	3209	649	327125	66017	-0.207374	0.0513484	-0.178359	0.0520354	0.836642	0.755522	0.926472	5.379e-05	1	1	0.0006089	1	1	D C09AA ACE inhibitors, plain [DG:DG01501]	E	p2yr
C09AA	1005	313	316247	76895	-0.352677	0.0834334	-0.32003	0.0878027	0.726128	0.611329	0.862484	2.368e-05	1	1	0.0002676	1	1	D C09AA ACE inhibitors, plain [DG:DG01501]	C	p5yr
C09AA	1098	220	2172	368	-0.385028	0.118341	-0.200941	0.122577	0.81796	0.643223	1.04017	0.00115	1	1	0.1012	1	0	D C09AA ACE inhibitors, plain [DG:DG01501]	A	p1yr
C09AA	135	35	331703	61439	-0.55436	0.242455	-0.463305	0.24522	0.6292	0.389096	1.01747	0.02223	0	0	0.05885	1	0	D C09AA ACE inhibitors, plain [DG:DG01501]	D	p1yr
C09AA	1005	313	20408	6569	-0.304547	0.0842192	-0.241494	0.0857788	0.785453	0.663899	0.929263	0.0002996	1	1	0.004876	1	1	D C09AA ACE inhibitors, plain [DG:DG01501]	G	p5yr
C09AA	3270	588	22100	4877	-0.131864	0.0559725	-0.0925027	0.0568563	0.911647	0.815509	1.01912	0.01849	0	0	0.1038	1	0	D C09AA ACE inhibitors, plain [DG:DG01501]	F	p1yr
C09AA	1074	244	2135	405	-0.39423	0.114589	-0.22235	0.118687	0.800635	0.634419	1.0104	0.0005871	1	1	0.06109	1	0	D C09AA ACE inhibitors, plain [DG:DG01501]	A	p2yr
C09AA	131	39	327125	66017	-0.528387	0.233934	-0.437631	0.236821	0.645564	0.405841	1.02689	0.0239	0	0	0.06461	1	0	D C09AA ACE inhibitors, plain [DG:DG01501]	D	p2yr
C09AA	3209	649	21582	5395	-0.133528	0.054097	-0.0953254	0.0549499	0.909077	0.816254	1.01246	0.01358	0	0	0.08279	1	0	D C09AA ACE inhibitors, plain [DG:DG01501]	F	p2yr
C09AA	131	39	327125	66017	-0.528387	0.233934	-0.437631	0.236821	0.645564	0.405841	1.02689	0.0239	0	0	0.06461	1	0	D C09AA ACE inhibitors, plain [DG:DG01501]	D	p5yr
C09AA	3056	802	20408	6569	-0.123854	0.050683	-0.0922473	0.0515651	0.91188	0.824221	1.00886	0.01454	0	0	0.07363	1	0	D C09AA ACE inhibitors, plain [DG:DG01501]	F	p5yr
C09AA	1005	313	2051	489	-0.335908	0.106704	-0.216305	0.109661	0.805489	0.64966	0.998696	0.001656	0	1	0.04863	1	1	D C09AA ACE inhibitors, plain [DG:DG01501]	A	p5yr
C09AA	3056	802	316247	76895	-0.135621	0.0481385	-0.12989	0.0481817	0.878192	0.799056	0.965166	0.004843	1	1	0.007022	1	1	D C09AA ACE inhibitors, plain [DG:DG01501]	E	p5yr
C09CA	1208	110	24281	2696	-0.330825	0.122655	-0.333986	0.127152	0.716064	0.558104	0.918731	0.006997	0	1	0.008627	1	1	D C09CA Angiotensin II receptor blockers, plain [DG:DG01495]	G	p6m
C09CA	1195	123	358901	34241	-0.391624	0.11629	-0.493491	0.12185	0.610491	0.480795	0.775173	0.0007582	1	1	5.123e-05	1	1	D C09CA Angiotensin II receptor blockers, plain [DG:DG01495]	C	p1yr
C09CA	1208	110	24281	2696	-0.330825	0.122655	-0.333986	0.127152	0.716064	0.558104	0.918731	0.006997	0	1	0.008627	1	1	D C09CA Angiotensin II receptor blockers, plain [DG:DG01495]	G	p1yr
C09CA	3533	325	358901	34241	-0.142405	0.0671113	-0.209878	0.0699954	0.810683	0.706758	0.92989	0.03384	0	0	0.002714	1	1	D C09CA Angiotensin II receptor blockers, plain [DG:DG01495]	E	p1yr
C09CA	1177	141	357251	35891	-0.319795	0.111023	-0.403604	0.116582	0.667909	0.531474	0.839367	0.003971	1	1	0.0005363	1	1	D C09CA Angiotensin II receptor blockers, plain [DG:DG01495]	C	p2yr
C09CA	1177	141	23739	3238	-0.326529	0.113221	-0.321166	0.117305	0.725303	0.576321	0.912797	0.00393	0	1	0.006188	1	1	D C09CA Angiotensin II receptor blockers, plain [DG:DG01495]	G	p2yr
C09CA	1153	165	353839	39303	-0.277539	0.105377	-0.320586	0.10914	0.725724	0.585964	0.898819	0.008444	1	1	0.00331	1	1	D C09CA Angiotensin II receptor blockers, plain [DG:DG01495]	C	p5yr
C09CA	1153	165	23302	3675	-0.316171	0.107556	-0.29874	0.110376	0.741752	0.597452	0.920905	0.003289	0	1	0.006802	1	1	D C09CA Angiotensin II receptor blockers, plain [DG:DG01495]	G	p5yr
C09CA	1195	123	2338	202	-0.348106	0.14914	-0.248102	0.159067	0.780281	0.571229	1.06584	0.01964	0	0	0.1189	1	0	D C09CA Angiotensin II receptor blockers, plain [DG:DG01495]	A	p1yr
C09CA	3533	325	23977	3000	-0.166214	0.0713223	-0.136059	0.0718273	0.872791	0.758173	1.00474	0.01979	0	0	0.0582	1	0	D C09CA Angiotensin II receptor blockers, plain [DG:DG01495]	F	p1yr
C09CA	1177	141	2326	214	-0.323074	0.144582	-0.23335	0.153401	0.791876	0.586194	1.06973	0.02551	0	0	0.1283	1	0	D C09CA Angiotensin II receptor blockers, plain [DG:DG01495]	A	p2yr
C09CA	3503	355	23739	3238	-0.167637	0.0693287	-0.131311	0.0698604	0.876945	0.764724	1.00563	0.01561	0	0	0.06017	1	0	D C09CA Angiotensin II receptor blockers, plain [DG:DG01495]	F	p2yr
C09CA	1153	165	2303	237	-0.279049	0.137816	-0.162746	0.140922	0.849807	0.644658	1.12024	0.04296	0	0	0.2482	1	0	D C09CA Angiotensin II receptor blockers, plain [DG:DG01495]	A	p5yr
C09CA	3456	402	23302	3675	-0.177919	0.0664463	-0.131027	0.0670341	0.877194	0.76919	1.00036	0.007419	0	1	0.05063	1	0	D C09CA Angiotensin II receptor blockers, plain [DG:DG01495]	F	p5yr
C10AA	895	423	291331	101811	-0.239738	0.0740346	-0.200036	0.0761222	0.818701	0.705229	0.950432	0.001203	1	1	0.008593	1	1	D C10AA HMG CoA reductase inhibitors [DG:DG01660]	C	p6m
C10AA	895	423	17425	9552	-0.422274	0.0757922	-0.317081	0.078157	0.728272	0.624832	0.848836	2.549e-08	1	1	4.985e-05	1	1	D C10AA HMG CoA reductase inhibitors [DG:DG01660]	G	p6m
C10AA	854	464	255620	137522	-0.716256	0.0756799	-0.606863	0.0776794	0.545058	0.468082	0.634693	2.971e-21	1	1	5.625e-15	1	1	D C10AA HMG CoA reductase inhibitors [DG:DG01660]	C	p1yr
C10AA	895	423	17425	9552	-0.422274	0.0757922	-0.317081	0.078157	0.728272	0.624832	0.848836	2.549e-08	1	1	4.985e-05	1	1	D C10AA HMG CoA reductase inhibitors [DG:DG01660]	G	p1yr
C10AA	854	464	1746	794	-0.69099	0.0943172	-0.628044	0.0970752	0.533635	0.441151	0.645507	2.871e-13	1	1	1.106e-10	1	1	D C10AA HMG CoA reductase inhibitors [DG:DG01660]	A	p1yr
C10AA	91	79	255620	137522	-0.683237	0.197109	-0.680971	0.197147	0.506125	0.343911	0.744853	0.0005277	1	1	0.0005521	1	1	D C10AA HMG CoA reductase inhibitors [DG:DG01660]	D	p1yr
C10AA	2600	1258	255620	137522	-0.180994	0.0420699	-0.157653	0.0425582	0.854146	0.78579	0.928449	1.691e-05	1	1	0.0002119	1	1	D C10AA HMG CoA reductase inhibitors [DG:DG01660]	E	p1yr
C10AA	821	497	249370	143772	-0.70364	0.0750709	-0.610057	0.0769375	0.54332	0.467268	0.63175	7.085e-21	1	1	2.21e-15	1	1	D C10AA HMG CoA reductase inhibitors [DG:DG01660]	C	p2yr
C10AA	821	497	15850	11127	-0.467026	0.0738902	-0.369793	0.0755532	0.690878	0.595782	0.801152	2.645e-10	1	1	9.911e-07	1	1	D C10AA HMG CoA reductase inhibitors [DG:DG01660]	G	p2yr
C10AA	821	497	1693	847	-0.72123	0.0935003	-0.661793	0.0959485	0.515925	0.427454	0.622707	1.548e-14	1	1	6.17e-12	1	1	D C10AA HMG CoA reductase inhibitors [DG:DG01660]	A	p2yr
C10AA	86	84	249370	143772	-0.694608	0.197566	-0.67583	0.197993	0.508734	0.345111	0.749934	0.0004384	1	1	0.0006416	1	1	D C10AA HMG CoA reductase inhibitors [DG:DG01660]	D	p2yr
C10AA	2514	1344	249370	143772	-0.14982	0.0415283	-0.1215	0.0420567	0.885591	0.81552	0.961684	0.000309	1	1	0.003866	1	1	D C10AA HMG CoA reductase inhibitors [DG:DG01660]	E	p2yr
C10AA	744	574	237935	155207	-0.560475	0.0735486	-0.491625	0.0749455	0.611632	0.528075	0.708409	2.533e-14	1	1	5.396e-11	1	1	D C10AA HMG CoA reductase inhibitors [DG:DG01660]	C	p5yr
C10AA	744	574	14700	12277	-0.376959	0.0723457	-0.299695	0.0738112	0.741044	0.641229	0.856397	1.896e-07	1	1	4.914e-05	1	1	D C10AA HMG CoA reductase inhibitors [DG:DG01660]	G	p5yr
C10AA	744	574	1617	923	-0.610507	0.0912542	-0.614163	0.0913206	0.541094	0.452393	0.647186	2.552e-11	1	1	2.011e-11	1	1	D C10AA HMG CoA reductase inhibitors [DG:DG01660]	A	p5yr
C10AA	86	84	249370	143772	-0.694608	0.197566	-0.67583	0.197993	0.508734	0.345111	0.749934	0.0004384	1	1	0.0006416	1	1	D C10AA HMG CoA reductase inhibitors [DG:DG01660]	D	p5yr
C10AA	86	84	15850	11127	-0.386775	0.194782	-0.3687	0.195505	0.691633	0.47147	1.01461	0.04708	0	0	0.05932	1	0	D C10AA HMG CoA reductase inhibitors [DG:DG01660]	H	p2yr
C10AA	2361	1497	237935	155207	-0.0852664	0.0408115	-0.0639317	0.0414021	0.938069	0.864954	1.01736	0.03668	0	0	0.1225	1	0	D C10AA HMG CoA reductase inhibitors [DG:DG01660]	E	p5yr
C10AB	3837	21	390666	2476	-0.633914	0.287013	-0.628731	0.287023	0.533268	0.30383	0.935968	0.0272	0	0	0.02849	1	1	D C10AB Fibrates	E	p5yr
C10AB	3837	21	26690	287	-0.774007	0.297491	-0.766026	0.297875	0.464857	0.259273	0.833452	0.009279	0	0	0.01013	1	1	D C10AB Fibrates	F	p5yr
D02AC	3790	68	26256	721	-0.286651	0.145308	-0.236383	0.146157	0.789479	0.592825	1.05137	0.04854	0	0	0.1058	1	0	D D02AC Soft paraffin and fat products	F	p1yr
D05AX	167	3	25621	1356	-1.95196	0.917821	-1.75952	0.919576	0.172128	0.0283839	1.04383	0.03345	0	0	0.05571	1	0	D D05AX Other antipsoriatics for topical use	H	p5yr
D06AX	3755	103	26050	927	-0.252245	0.11392	-0.197356	0.114455	0.820898	0.655935	1.02735	0.02682	0	0	0.08466	1	0	D D06AX Other antibiotics for topical use	F	p2yr
D07AB	3626	232	24868	2109	-0.208722	0.0757864	-0.152356	0.0761999	0.858683	0.739552	0.997004	0.005889	0	1	0.04557	1	1	D D07AB Corticosteroids, moderately potent (group II)	F	p5yr
D08AC	3840	18	26766	211	-0.73653	0.296093	-0.620353	0.296946	0.537754	0.300478	0.962398	0.01287	0	0	0.03671	1	1	D D08AC Biguanides and amidines	F	p5yr
D10AF	3839	19	26806	171	-0.561145	0.253694	-0.523693	0.25472	0.592329	0.359531	0.975864	0.02698	0	0	0.03979	1	1	D D10AF Antiinfectives for treatment of acne	F	p5yr
G03CA	3679	179	25257	1720	-0.397705	0.0784991	-0.350771	0.0789143	0.704145	0.603236	0.821934	4.078e-07	1	1	8.821e-06	1	1	D G03CA Natural and semisynthetic estrogens, plain	F	p1yr
G03CA	1256	62	24712	2265	-0.411647	0.135777	-0.375416	0.136071	0.687004	0.526175	0.89699	0.002433	0	1	0.005802	1	1	D G03CA Natural and semisynthetic estrogens, plain	G	p2yr
G03CA	3615	243	24712	2265	-0.36021	0.0691184	-0.314315	0.0694912	0.730289	0.637296	0.836851	1.885e-07	1	1	6.117e-06	1	1	D G03CA Natural and semisynthetic estrogens, plain	F	p2yr
G03CA	1226	92	23731	3246	-0.44203	0.117485	-0.406342	0.117811	0.666083	0.528741	0.839099	0.0001686	1	1	0.0005633	1	1	D G03CA Natural and semisynthetic estrogens, plain	G	p5yr
G03CA	3494	364	23731	3246	-0.314955	0.0596114	-0.264093	0.0600183	0.767902	0.682679	0.863765	1.276e-07	1	1	1.085e-05	1	1	D G03CA Natural and semisynthetic estrogens, plain	F	p5yr
G04CB	3778	80	26001	976	-0.357892	0.139982	-0.309692	0.140453	0.733673	0.557114	0.966186	0.01057	0	0	0.02746	1	1	D G04CB Testosterone-5-alpha reductase inhibitors	F	p1yr
G04CB	3765	93	25897	1080	-0.32432	0.129876	-0.282654	0.130398	0.75378	0.583775	0.973294	0.01252	0	0	0.03019	1	1	D G04CB Testosterone-5-alpha reductase inhibitors	F	p2yr
G04CB	164	6	25897	1080	-1.18309	0.585712	-1.17065	0.586383	0.310167	0.0982749	0.978921	0.0434	0	0	0.0459	1	1	D G04CB Testosterone-5-alpha reductase inhibitors	H	p2yr
G04CB	1268	50	25705	1272	-0.467346	0.186503	-0.427556	0.18707	0.652101	0.451932	0.940928	0.01222	0	0	0.02229	1	1	D G04CB Testosterone-5-alpha reductase inhibitors	G	p5yr
G04CB	1286	32	26132	845	-0.520371	0.235326	-0.441247	0.235926	0.643234	0.405079	1.02141	0.02702	0	0	0.06146	1	0	D G04CB Testosterone-5-alpha reductase inhibitors	G	p6m
G04CB	1286	32	26132	845	-0.520371	0.235326	-0.441247	0.235926	0.643234	0.405079	1.02141	0.02702	0	0	0.06146	1	0	D G04CB Testosterone-5-alpha reductase inhibitors	G	p1yr
G04CB	1275	43	25897	1080	-0.422462	0.198871	-0.373952	0.199663	0.68801	0.465194	1.01755	0.03365	0	0	0.06109	1	0	D G04CB Testosterone-5-alpha reductase inhibitors	G	p2yr
G04CB	3743	115	25705	1272	-0.27533	0.116098	-0.218213	0.116649	0.803954	0.63964	1.01048	0.01772	0	0	0.0614	1	0	D G04CB Testosterone-5-alpha reductase inhibitors	F	p5yr
G04CB	163	7	25705	1272	-1.32819	0.568224	-1.32112	0.568838	0.266835	0.0875035	0.813693	0.01942	0	0	0.02021	1	1	D G04CB Testosterone-5-alpha reductase inhibitors	H	p5yr
H02AB	3378	480	22832	4145	-0.141098	0.0592779	-0.0467893	0.0602001	0.954288	0.848077	1.0738	0.01731	0	0	0.437	1	0	D H02AB Glucocorticoids	F	p2yr
H02AB	3084	774	20443	6534	-0.148976	0.0484297	-0.0488596	0.0497787	0.952315	0.863788	1.04991	0.002099	1	1	0.3263	1	0	D H02AB Glucocorticoids	F	p5yr
H03AA	1237	81	24575	2402	-0.40879	0.13289	-0.356737	0.133279	0.699956	0.539038	0.908914	0.002099	1	1	0.007441	1	1	D H03AA Thyroid hormones	G	p6m
H03AA	1234	84	359009	34133	-0.482573	0.128709	-0.465681	0.128847	0.627707	0.487621	0.808038	0.0001773	1	1	0.0003013	1	1	D H03AA Thyroid hormones	C	p1yr
H03AA	1237	81	24575	2402	-0.40879	0.13289	-0.356737	0.133279	0.699956	0.539038	0.908914	0.002099	1	1	0.007441	1	1	D H03AA Thyroid hormones	G	p1yr
H03AA	1234	84	2353	187	-0.369555	0.157201	-0.315937	0.159041	0.729106	0.533791	0.995886	0.01878	0	0	0.04705	1	1	D H03AA Thyroid hormones	A	p1yr
H03AA	3587	271	359009	34133	-0.217739	0.0658626	-0.213238	0.065891	0.807964	0.710076	0.919345	0.0009466	1	1	0.001211	1	1	D H03AA Thyroid hormones	E	p1yr
H03AA	3587	271	24401	2576	-0.211849	0.0701008	-0.188707	0.0703751	0.828029	0.72134	0.950499	0.002513	0	1	0.007335	1	1	D H03AA Thyroid hormones	F	p1yr
H03AA	1233	85	358601	34541	-0.485569	0.128112	-0.471449	0.128273	0.624097	0.485362	0.802488	0.0001505	1	1	0.0002376	1	1	D H03AA Thyroid hormones	C	p2yr
H03AA	1233	85	24385	2592	-0.446214	0.130116	-0.399835	0.130555	0.670431	0.519064	0.865939	0.0006059	1	1	0.002196	1	1	D H03AA Thyroid hormones	G	p2yr
H03AA	1233	85	2352	188	-0.362387	0.156603	-0.31032	0.157961	0.733213	0.537936	0.999377	0.02072	0	0	0.04954	1	1	D H03AA Thyroid hormones	A	p2yr
H03AA	3585	273	358601	34541	-0.225512	0.0656614	-0.220994	0.0656923	0.801721	0.704865	0.911887	0.0005938	1	1	0.0007681	1	1	D H03AA Thyroid hormones	E	p2yr
H03AA	3585	273	24385	2592	-0.210696	0.0698886	-0.188209	0.0701781	0.828442	0.721978	0.950605	0.002574	0	1	0.007325	1	1	D H03AA Thyroid hormones	F	p2yr
H03AA	1232	86	358061	35081	-0.496625	0.127662	-0.485724	0.127786	0.615252	0.47894	0.790359	0.0001002	1	1	0.0001441	1	1	D H03AA Thyroid hormones	C	p5yr
H03AA	1232	86	24351	2626	-0.450029	0.129637	-0.416908	0.130047	0.659081	0.510785	0.850433	0.0005184	1	1	0.001348	1	1	D H03AA Thyroid hormones	G	p5yr
H03AA	1232	86	2350	190	-0.369785	0.156021	-0.342107	0.15701	0.710272	0.522079	0.966304	0.01783	0	0	0.0294	1	1	D H03AA Thyroid hormones	A	p5yr
H03AA	3582	276	358061	35081	-0.234233	0.0653727	-0.233507	0.0653817	0.791752	0.696524	0.9	0.0003397	1	1	0.0003551	1	1	D H03AA Thyroid hormones	E	p5yr
H03AA	3582	276	24351	2626	-0.210712	0.0695805	-0.187906	0.0698671	0.828692	0.722637	0.950313	0.002461	0	1	0.00716	1	1	D H03AA Thyroid hormones	F	p5yr
J01CF	2990	868	20214	6763	-0.0893116	0.0434601	-0.0303933	0.0441519	0.970064	0.889645	1.05775	0.03989	0	0	0.4912	1	0	D J01CF Beta-lactamase resistant penicillins [DG:DG01779]	F	p5yr
J01CR	3516	342	23760	3217	-0.280425	0.0661886	-0.178449	0.0671822	0.836566	0.733352	0.954307	2.274e-05	1	1	0.007907	1	1	D J01CR Combinations of penicillins, incl. beta-lactamase inhibitors	F	p5yr
J01CR	3664	194	25284	1693	-0.203589	0.0874563	-0.092044	0.0883692	0.912065	0.767013	1.08455	0.01992	0	0	0.2976	1	0	D J01CR Combinations of penicillins, incl. beta-lactamase inhibitors	F	p2yr
J01DB	3814	44	26516	461	-0.382951	0.193542	-0.252371	0.195451	0.776956	0.529691	1.13965	0.04786	0	0	0.1966	1	0	D J01DB First-generation cephalosporins [DG:DG01774]	F	p1yr
J01EA	3782	76	26112	865	-0.369297	0.134616	-0.259111	0.135662	0.771737	0.591547	1.00681	0.006085	0	1	0.05615	1	0	D J01EA Trimethoprim and derivatives [DG:DG01581]	F	p1yr
J01EA	3705	153	25412	1565	-0.239134	0.0947701	-0.114258	0.0960284	0.892028	0.738985	1.07677	0.01163	0	0	0.2341	1	0	D J01EA Trimethoprim and derivatives [DG:DG01581]	F	p2yr
J01EE	3835	23	26705	272	-0.558681	0.252506	-0.334548	0.254339	0.715662	0.434716	1.17818	0.02694	0	0	0.1884	1	0	D J01EE Combinations of sulfonamides and trimethoprim, incl. derivatives	F	p5yr
J01FA	3258	600	22187	4790	-0.104513	0.0505032	-0.025183	0.0515739	0.975131	0.881377	1.07886	0.03851	0	0	0.6253	1	0	D J01FA Macrolides [DG:DG01551]	F	p5yr
J01MA	3821	37	26450	527	-0.709829	0.193237	-0.640716	0.194051	0.526915	0.360211	0.770768	0.0002398	1	1	0.0009618	1	1	D J01MA Fluoroquinolones [DG:DG01549]	F	p1yr
J01MA	3775	83	26014	963	-0.527391	0.130588	-0.454206	0.131296	0.634952	0.490881	0.821306	5.39e-05	1	1	0.0005421	1	1	D J01MA Fluoroquinolones [DG:DG01549]	F	p2yr
J01MA	3676	182	25105	1872	-0.37796	0.0870837	-0.278221	0.088115	0.757129	0.637035	0.899863	1.428e-05	1	1	0.001593	1	1	D J01MA Fluoroquinolones [DG:DG01549]	F	p5yr
J01XE	3127	731	20697	6280	-0.105933	0.0465035	-0.00331831	0.0476508	0.996687	0.907814	1.09426	0.02274	0	0	0.9445	1	0	D J01XE Nitrofuran derivatives	F	p5yr
J01XX	3851	7	26830	147	-1.33864	0.523567	-1.14754	0.525153	0.317417	0.113397	0.888503	0.01057	0	0	0.02889	1	1	D J01XX Other antibacterials	F	p1yr
J01XX	3842	16	26715	262	-0.614279	0.291572	-0.338288	0.294313	0.71299	0.400456	1.26944	0.03514	0	0	0.2504	1	0	D J01XX Other antibacterials	F	p5yr
J07AL	3840	18	26744	233	-0.687357	0.246475	-0.496937	0.248331	0.608392	0.373935	0.989853	0.005294	0	1	0.04539	1	1	D J07AL Pneumococcal vaccines	F	p1yr
J07AL	3793	65	382801	10341	-0.35866	0.123947	-0.260685	0.12592	0.770524	0.602008	0.986211	0.003808	1	1	0.03843	1	1	D J07AL Pneumococcal vaccines	E	p5yr
J07AL	3793	65	26224	753	-0.491997	0.129587	-0.308448	0.132159	0.734586	0.56695	0.95179	0.0001469	1	1	0.01961	1	1	D J07AL Pneumococcal vaccines	F	p5yr
J07AL	3821	37	26541	436	-0.535441	0.169536	-0.321354	0.171774	0.725167	0.517867	1.01545	0.001589	1	1	0.06138	1	0	D J07AL Pneumococcal vaccines	F	p2yr
J07AL	1294	24	26224	753	-0.475458	0.225542	-0.317762	0.22879	0.727776	0.464775	1.1396	0.03503	0	0	0.1649	1	0	D J07AL Pneumococcal vaccines	G	p5yr
J07AM	3836	22	26584	393	-0.802824	0.215362	-0.588223	0.217639	0.555313	0.362473	0.850745	0.0001935	1	1	0.006881	1	1	D J07AM Tetanus vaccines	F	p5yr
J07AP	3743	115	25942	1035	-0.362533	0.0960097	-0.251436	0.101547	0.777683	0.637327	0.94895	0.0001597	1	1	0.01329	1	1	D J07AP Typhoid vaccines	F	p5yr
J07AP	3820	38	26631	346	-0.364335	0.160444	-0.293251	0.161339	0.745835	0.543632	1.02325	0.02317	0	0	0.06913	1	0	D J07AP Typhoid vaccines	F	p2yr
J07AP	3743	115	378194	14948	-0.207825	0.0900303	-0.173674	0.0902976	0.840571	0.704227	1.00331	0.02098	0	0	0.05444	1	0	D J07AP Typhoid vaccines	E	p5yr
J07BB	3629	229	23649	3328	-0.664476	0.0747113	-0.502073	0.0654173	0.605275	0.532436	0.688079	6.214e-19	1	1	1.704e-14	1	1	D J07BB Influenza vaccines	F	p1yr
J07BB	1161	157	22138	4839	-0.461479	0.0964526	-0.460794	0.096248	0.630783	0.522336	0.761745	1.723e-06	1	1	1.697e-06	1	1	D J07BB Influenza vaccines	G	p2yr
J07BB	160	10	342364	50778	-1.05023	0.357483	-1.18673	0.357696	0.305219	0.151405	0.615296	0.003305	1	1	0.0009077	1	1	D J07BB Influenza vaccines	D	p2yr
J07BB	3484	374	342364	50778	-0.19039	0.0569614	-0.270212	0.0560983	0.763218	0.68375	0.851922	0.0008305	1	1	1.46e-06	1	1	D J07BB Influenza vaccines	E	p2yr
J07BB	3484	374	22138	4839	-0.503063	0.059567	-0.440311	0.0594966	0.643836	0.572967	0.72347	3.163e-17	1	1	1.39e-13	1	1	D J07BB Influenza vaccines	F	p2yr
J07BB	160	10	22138	4839	-1.35686	0.359992	-1.39748	0.360166	0.24722	0.122038	0.500808	0.0001642	1	1	0.0001047	1	1	D J07BB Influenza vaccines	H	p2yr
J07BB	1090	228	20551	6426	-0.361543	0.0825523	-0.351492	0.0828979	0.703637	0.598113	0.827779	1.193e-05	1	1	2.242e-05	1	1	D J07BB Influenza vaccines	G	p5yr
J07BB	160	10	342364	50778	-1.05023	0.357483	-1.18673	0.357696	0.305219	0.151405	0.615296	0.003305	1	1	0.0009077	1	1	D J07BB Influenza vaccines	D	p5yr
J07BB	3320	538	321673	71469	-0.179992	0.0487667	-0.1926	0.0494908	0.824812	0.748563	0.908828	0.0002235	1	1	9.959e-05	1	1	D J07BB Influenza vaccines	E	p5yr
J07BB	3320	538	20551	6426	-0.424227	0.0512668	-0.33752	0.0527378	0.713538	0.643465	0.791242	1.337e-16	1	1	1.577e-10	1	1	D J07BB Influenza vaccines	F	p5yr
J07BB	147	23	20551	6426	-0.79039	0.250191	-0.803994	0.250448	0.447538	0.273929	0.731175	0.001584	1	1	0.001328	1	1	D J07BB Influenza vaccines	H	p5yr
J07BC	3838	20	26766	211	-0.438476	0.211932	-0.328349	0.213105	0.720112	0.474239	1.09346	0.03856	0	0	0.1234	1	0	D J07BC Hepatitis vaccines	F	p2yr
J07CA	3831	27	26709	268	-0.574266	0.201116	-0.549471	0.201606	0.577255	0.388824	0.857002	0.004301	0	1	0.006425	1	1	D J07CA Bacterial and viral vaccines, combined	F	p1yr
J07CA	1295	23	26262	715	-0.479275	0.223322	-0.480855	0.223861	0.618254	0.398665	0.958796	0.03187	0	0	0.03172	1	1	D J07CA Bacterial and viral vaccines, combined	G	p2yr
J07CA	3777	81	26262	715	-0.338569	0.114285	-0.31628	0.114667	0.728855	0.582148	0.912535	0.003054	0	1	0.005814	1	1	D J07CA Bacterial and viral vaccines, combined	F	p2yr
J07CA	1240	78	24839	2138	-0.266595	0.120506	-0.262552	0.120759	0.769086	0.606988	0.974473	0.02695	0	0	0.0297	1	1	D J07CA Bacterial and viral vaccines, combined	G	p5yr
J07CA	3777	81	382676	10466	-0.21593	0.107107	-0.207829	0.107117	0.812346	0.65851	1.00212	0.0438	0	0	0.05236	1	0	D J07CA Bacterial and viral vaccines, combined	E	p2yr
J07CA	3585	273	359745	33397	-0.116978	0.0592778	-0.109417	0.0593015	0.896356	0.798	1.00684	0.04845	0	0	0.06502	1	0	D J07CA Bacterial and viral vaccines, combined	E	p5yr
J07CA	3585	273	24839	2138	-0.147252	0.06389	-0.0719219	0.067367	0.930604	0.815492	1.06196	0.02119	0	0	0.2857	1	0	D J07CA Bacterial and viral vaccines, combined	F	p5yr
L01BC	3845	13	26718	259	-0.658799	0.275264	-0.633139	0.275885	0.530923	0.309163	0.911748	0.0167	0	0	0.02174	1	1	D L01BC Pyrimidine analogues	F	p1yr
L01BC	3819	39	26435	542	-0.363868	0.169041	-0.3245	0.169582	0.722889	0.518462	1.00792	0.03136	0	0	0.05569	1	0	D L01BC Pyrimidine analogues	F	p2yr
L01BC	3773	85	25916	1061	-0.273171	0.118743	-0.227042	0.119181	0.796887	0.630878	1.00658	0.02143	0	0	0.05679	1	0	D L01BC Pyrimidine analogues	F	p5yr
L02AE	3838	20	26647	330	-0.888432	0.287763	-0.858689	0.288121	0.423717	0.240889	0.745306	0.002021	1	1	0.002882	1	1	D L02AE Gonadotropin releasing hormone analogues	F	p1yr
L02AE	3834	24	26592	385	-0.87045	0.263888	-0.820864	0.264296	0.440051	0.262135	0.738722	0.0009729	1	1	0.001899	1	1	D L02AE Gonadotropin releasing hormone analogues	F	p2yr
L02AE	3825	33	26501	476	-0.69015	0.218766	-0.66358	0.219296	0.515004	0.335072	0.791558	0.001608	1	1	0.00248	1	1	D L02AE Gonadotropin releasing hormone analogues	F	p5yr
L02BA	3849	9	26853	124	-0.811831	0.333057	-0.818333	0.334018	0.441167	0.229232	0.849044	0.01479	0	0	0.01429	1	1	D L02BA Anti-estrogens	F	p1yr
L02BA	3845	13	26815	162	-0.648094	0.274143	-0.629402	0.27537	0.53291	0.310635	0.914237	0.01808	0	0	0.02228	1	1	D L02BA Anti-estrogens	F	p2yr
L02BA	3836	22	26747	230	-0.480365	0.220227	-0.468859	0.221522	0.625716	0.405331	0.965929	0.02917	0	0	0.03431	1	1	D L02BA Anti-estrogens	F	p5yr
L02BB	3843	15	26749	228	-0.608968	0.289822	-0.257296	0.31004	0.77314	0.421057	1.41963	0.03563	0	0	0.4066	1	0	D L02BB Anti-androgens	F	p5yr
M01AB	3825	33	26656	321	-0.519332	0.190083	-0.372891	0.191766	0.68874	0.472952	1.00298	0.006296	0	0	0.05184	1	0	D M01AB Acetic acid derivatives and related substances	F	p2yr
M01AB	3764	94	26217	760	-0.29928	0.113476	-0.216982	0.114614	0.804944	0.642987	1.0077	0.008359	0	1	0.05835	1	0	D M01AB Acetic acid derivatives and related substances	F	p5yr
M01AE	3600	258	24862	2115	-0.230299	0.0676519	-0.0734567	0.0712594	0.929176	0.808053	1.06846	0.0006645	1	1	0.3026	1	0	D M01AE Propionic acid derivatives	F	p1yr
M01AE	3378	480	23469	3508	-0.112951	0.0517255	0.0144007	0.0555008	1.0145	0.909934	1.13109	0.02899	0	0	0.7953	1	0	D M01AE Propionic acid derivatives	F	p2yr
M02AC	1316	2	2528	12	-2.39937	1.19793	-2.26082	1.1968	0.104265	0.00997931	1.08938	0.04526	0	0	0.05896	1	0	D M02AC Preparations with salicylic acid derivatives	A	p2yr
N01BB	3635	223	24870	2107	-0.197734	0.0752842	-0.0865231	0.0783589	0.917114	0.786542	1.06936	0.008631	0	1	0.2695	1	0	D N01BB Amides	F	p5yr
N01BX	3835	23	26658	319	-0.616079	0.249106	-0.499527	0.250441	0.606817	0.371427	0.991385	0.0134	0	0	0.0461	1	1	D N01BX Other local anesthetics	F	p2yr
N01BX	3788	70	26229	748	-0.276458	0.140183	-0.143894	0.141876	0.86598	0.65575	1.14361	0.04861	0	0	0.3105	1	0	D N01BX Other local anesthetics	F	p5yr
N02AX	3753	105	25926	1051	-0.465822	0.123557	-0.316751	0.125292	0.728512	0.569881	0.9313	0.0001635	1	1	0.01147	1	1	D N02AX Other opioids	F	p1yr
N02AX	3699	159	25430	1547	-0.380996	0.0987436	-0.21787	0.100727	0.80423	0.660143	0.979767	0.0001143	1	1	0.03055	1	1	D N02AX Other opioids	F	p2yr
N02AX	3530	328	24025	2952	-0.264798	0.0691882	-0.141155	0.0714517	0.868355	0.754875	0.998894	0.0001299	1	1	0.04822	1	1	D N02AX Other opioids	F	p5yr
N02AX	1252	66	25430	1547	-0.403063	0.159438	-0.314127	0.160594	0.730427	0.533179	1.00064	0.01148	0	0	0.05047	1	0	D N02AX Other opioids	G	p2yr
N02CX	3850	8	26883	94	-0.885815	0.419583	-0.797939	0.420197	0.450256	0.197594	1.026	0.03476	0	0	0.05758	1	0	D N02CX Other antimigraine preparations	F	p1yr
N03AX	3593	265	24621	2356	-0.3512	0.0794964	-0.230519	0.081138	0.794121	0.67736	0.93101	1e-05	1	1	0.004499	1	1	D N03AX Other antiepileptics	F	p1yr
N03AX	3525	333	24025	2952	-0.315644	0.0702976	-0.200346	0.0723071	0.818447	0.710298	0.943064	7.145e-06	1	1	0.005596	1	1	D N03AX Other antiepileptics	F	p2yr
N03AX	3354	504	22739	4238	-0.235674	0.0575124	-0.129376	0.0597498	0.878644	0.781541	0.987811	4.182e-05	1	1	0.03037	1	1	D N03AX Other antiepileptics	F	p5yr
N05AB	3588	270	24495	2482	-0.138754	0.0686308	-0.0605915	0.0693568	0.941208	0.821574	1.07826	0.04321	0	0	0.3823	1	0	D N05AB Phenothiazines with piperazine structure	F	p5yr
N05CF	3720	138	25770	1207	-0.196137	0.0992317	-0.0796036	0.100328	0.923482	0.758623	1.12417	0.0481	0	0	0.4275	1	0	D N05CF Benzodiazepine related drugs	F	p2yr
N05CF	3602	256	24827	2150	-0.185859	0.0738772	-0.096265	0.0747138	0.908223	0.784501	1.05146	0.01188	0	0	0.1976	1	0	D N05CF Benzodiazepine related drugs	F	p5yr
N06AA	3602	256	24659	2318	-0.23194	0.0749852	-0.110616	0.0765655	0.895282	0.770521	1.04024	0.001982	1	1	0.1485	1	0	D N06AA Non-selective monoamine reuptake inhibitors [DG:DG01730]	F	p1yr
N06AA	3498	360	23773	3204	-0.231503	0.0635029	-0.11667	0.0652872	0.889879	0.78299	1.01136	0.0002673	1	1	0.07394	1	0	D N06AA Non-selective monoamine reuptake inhibitors [DG:DG01730]	F	p2yr
N06AA	3220	638	21791	5186	-0.131163	0.0492122	-0.0139373	0.0518127	0.986159	0.890927	1.09157	0.007697	0	1	0.7879	1	0	D N06AA Non-selective monoamine reuptake inhibitors [DG:DG01730]	F	p5yr
N07BB	3856	2	26922	55	-1.84117	0.804615	-1.79084	0.805293	0.16682	0.0344155	0.808614	0.02213	0	0	0.02617	1	1	D N07BB Drugs used in alcohol dependence	F	p5yr
N07CA	1288	30	2482	58	-0.688281	0.289741	-0.709844	0.295687	0.491721	0.275391	0.877986	0.01757	0	0	0.01641	1	1	D N07CA Antivertigo preparations	A	p2yr
R01AD	160	10	354259	38883	-0.819468	0.400261	-0.785028	0.400486	0.456107	0.208052	0.999913	0.04063	0	0	0.04997	1	1	D R01AD Corticosteroids	D	p2yr
R01AD	160	10	23534	3443	-0.942393	0.40261	-0.930903	0.402135	0.394197	0.179226	0.867015	0.01925	0	0	0.02063	1	1	D R01AD Corticosteroids	H	p2yr
R01AD	160	10	354259	38883	-0.819468	0.400261	-0.785028	0.400486	0.456107	0.208052	0.999913	0.04063	0	0	0.04997	1	1	D R01AD Corticosteroids	D	p5yr
R03AC	3250	608	22189	4788	-0.142487	0.0605276	-0.081437	0.0610458	0.921791	0.817839	1.03895	0.01857	0	0	0.1822	1	0	D R03AC Selective beta-2-adrenoreceptor agonists	F	p2yr
R03BA	1278	40	2418	122	-0.74423	0.220465	-0.713622	0.222525	0.489867	0.316668	0.757794	0.0007435	1	1	0.001353	1	1	D R03BA Glucocorticoids	A	p1yr
R03BA	1264	54	25467	1510	-0.403857	0.164918	-0.355055	0.165537	0.701135	0.506863	0.969869	0.01434	0	0	0.03197	1	1	D R03BA Glucocorticoids	G	p2yr
R03BA	1264	54	2394	146	-0.59194	0.195209	-0.560256	0.197344	0.571063	0.387839	0.840847	0.002443	0	1	0.00455	1	1	D R03BA Glucocorticoids	A	p2yr
R03BA	1227	91	24722	2255	-0.312036	0.133416	-0.264878	0.133974	0.7673	0.590094	0.997721	0.01935	0	0	0.04804	1	1	D R03BA Glucocorticoids	G	p5yr
R03BA	1278	40	378273	14869	-0.389094	0.185742	-0.353297	0.185973	0.702369	0.487825	1.01127	0.03619	0	0	0.05747	1	0	D R03BA Glucocorticoids	C	p1yr
R03BA	1264	54	374491	18651	-0.330699	0.162808	-0.301898	0.163021	0.739413	0.537184	1.01777	0.04223	0	0	0.06404	1	0	D R03BA Glucocorticoids	C	p2yr
R03BA	3574	284	24722	2255	-0.14993	0.0734624	-0.0880066	0.0747717	0.915755	0.790917	1.0603	0.04127	0	0	0.2392	1	0	D R03BA Glucocorticoids	F	p5yr
R03DC	3797	61	26347	630	-0.513457	0.156123	-0.411339	0.158177	0.662762	0.486085	0.903656	0.001007	1	1	0.009313	1	1	D R03DC Leukotriene receptor antagonists	F	p5yr
J07BB	1034	284	303160	89982	-0.169588	0.0750606	-0.167313	0.0752854	0.845935	0.729884	0.980438	0.02386	0	0	0.02626	1	1	D J07BB Influenza vaccines	C	p10y
J07CA	1145	173	325108	68034	-0.185938	0.0839763	-0.186934	0.0839859	0.829499	0.703601	0.977924	0.02682	0	0	0.02603	1	1	D J07CA Bacterial and viral vaccines, combined	C	p10y
J07BB	1034	284	19029	7948	-0.379574	0.0766135	-0.353123	0.0769019	0.702491	0.604197	0.816775	7.297e-07	1	1	4.412e-06	1	1	D J07BB Influenza vaccines	G	p10y
R03DC	3821	37	26591	386	-0.468675	0.200886	-0.372399	0.20197	0.689079	0.463816	1.02375	0.01965	0	0	0.06522	1	0	D R03DC Leukotriene receptor antagonists	F	p1yr
J07CA	1145	173	22409	4568	-0.247498	0.0858446	-0.231117	0.086057	0.793646	0.670459	0.939468	0.003941	0	0	0.007244	1	1	D J07CA Bacterial and viral vaccines, combined	G	p10y
R03DC	1296	22	26347	630	-0.524884	0.263907	-0.45447	0.26457	0.634784	0.377932	1.0662	0.04672	0	0	0.08585	1	0	D R03DC Leukotriene receptor antagonists	G	p5yr
J07AL	1253	65	24839	2138	-0.40361	0.137435	-0.220454	0.143073	0.802155	0.605995	1.06181	0.00332	0	1	0.1234	1	0	D J07AL Pneumococcal vaccines	G	p10y
J07AL	3688	170	366548	26594	-0.247006	0.0795102	-0.15679	0.0828595	0.854884	0.726736	1.00563	0.001893	1	1	0.05846	1	0	D J07AL Pneumococcal vaccines	E	p10y
J07AM	3829	29	387493	5649	-0.438222	0.181949	-0.350434	0.184088	0.704382	0.491034	1.01043	0.01602	0	1	0.05696	1	0	D J07AM Tetanus vaccines	E	p10y
R05DA	3668	190	25218	1759	-0.30051	0.086928	-0.195715	0.0880813	0.822247	0.69187	0.977192	0.000547	1	1	0.02629	1	1	D R05DA Opium alkaloids and derivatives	F	p1yr
R05DA	3529	329	24113	2864	-0.227422	0.0671042	-0.126989	0.068211	0.880744	0.770523	1.00673	0.0007021	1	1	0.06265	1	0	D R05DA Opium alkaloids and derivatives	F	p2yr
J07AP	1248	70	24963	2014	-0.30222	0.125577	-0.236406	0.126307	0.78946	0.616329	1.01123	0.01611	0	0	0.06126	1	0	D J07AP Typhoid vaccines	G	p10y
J07AP	3628	230	364435	28707	-0.153182	0.0651927	-0.0872142	0.0668922	0.916481	0.803867	1.04487	0.01879	0	1	0.1923	1	0	D J07AP Typhoid vaccines	E	p10y
J07AP	3628	230	24963	2014	-0.268409	0.0697129	-0.110539	0.0752048	0.895352	0.772639	1.03755	0.0001183	1	1	0.1416	1	0	D J07AP Typhoid vaccines	F	p10y
R05DA	3224	634	21712	5265	-0.179063	0.0502041	-0.0908819	0.0514239	0.913126	0.825575	1.00996	0.0003621	1	1	0.07719	1	0	D R05DA Opium alkaloids and derivatives	F	p5yr
J07BC	3624	234	25246	1731	-0.145499	0.0696416	0.0423181	0.0779334	1.04323	0.895445	1.2154	0.03669	0	0	0.5871	1	0	D J07BC Hepatitis vaccines	F	p10y
S01BA	3842	16	26706	271	-0.632446	0.270046	-0.591327	0.271086	0.553592	0.325411	0.941776	0.01919	0	0	0.02917	1	1	D S01BA Corticosteroids, plain	F	p1yr
S01BC	3853	5	26879	98	-1.25034	0.586371	-1.22055	0.587127	0.295067	0.0933549	0.932618	0.03299	0	0	0.03764	1	1	D S01BC Antiinflammatory agents, non-steroids	F	p2yr
S01EA	3850	8	26812	165	-1.03319	0.439791	-1.02897	0.44022	0.357377	0.150798	0.846947	0.01882	0	0	0.01943	1	1	D S01EA Sympathomimetics in glaucoma therapy	F	p5yr
J07CA	3276	582	325108	68034	-0.0947669	0.0434021	-0.0684025	0.0440375	0.933884	0.85666	1.01807	0.029	0	0	0.1204	1	0	D J07CA Bacterial and viral vaccines, combined	E	p10y
J07BB	160	10	342364	50778	-1.05023	0.357483	-1.18673	0.357696	0.305219	0.151405	0.615296	0.003305	1	1	0.0009077	1	1	D J07BB Influenza vaccines	D	p10y
J07CA	3276	582	22409	4568	-0.15719	0.0468043						0.0007848	1	1		1		D J07CA Bacterial and viral vaccines, combined	F	p10y
S01EC	3835	23	26619	358	-0.521655	0.239042	-0.501874	0.240149	0.605395	0.378108	0.969308	0.0291	0	0	0.03664	1	1	D S01EC Carbonic anhydrase inhibitors	F	p1yr
J07BB	3177	681	303160	89982	-0.190724	0.0446895	-0.16768	0.0466022	0.845624	0.771808	0.9265	1.975e-05	1	1	0.0003206	1	1	D J07BB Influenza vaccines	E	p10y
S01EC	3833	25	26574	403	-0.600993	0.229556	-0.625205	0.229863	0.535152	0.341043	0.839739	0.008847	0	0	0.006534	1	1	D S01EC Carbonic anhydrase inhibitors	F	p2yr
S01EC	3825	33	387931	5211	-0.389253	0.191552	-0.393492	0.191553	0.674697	0.463509	0.982108	0.04214	0	0	0.03995	1	1	D S01EC Carbonic anhydrase inhibitors	E	p5yr
J07BB	3177	681	19029	7948	-0.406926	0.0470885	-0.30461	0.0499801	0.737411	0.668598	0.813307	5.799e-18	1	1	1.11e-09	1	1	D J07BB Influenza vaccines	F	p10y
J07AL	3688	170	24839	2138	-0.407418	0.0830612	-0.218748	0.087173	0.803524	0.677321	0.953243	9.388e-07	1	1	0.0121	1	1	D J07AL Pneumococcal vaccines	F	p10y
S01EC	3825	33	26465	512	-0.569322	0.198617	-0.579967	0.19904	0.559917	0.379048	0.827091	0.004154	0	1	0.003573	1	1	D S01EC Carbonic anhydrase inhibitors	F	p5yr
S01ED	1309	9	26576	401	-0.94924	0.406913	-0.898173	0.407523	0.407313	0.183244	0.905373	0.01967	0	0	0.02753	1	1	D S01ED Beta blocking agents	G	p6m
J07AM	3829	29	26495	482	-0.707346	0.188038	-0.502166	0.19037	0.605219	0.416737	0.878946	0.0001691	1	1	0.008348	1	1	D J07AM Tetanus vaccines	F	p10y
S01ED	1308	10	388022	5120	-0.853004	0.390861	-0.84097	0.390922	0.431292	0.200455	0.927952	0.02908	0	0	0.03146	1	1	D S01ED Beta blocking agents	C	p1yr
S01ED	1309	9	26576	401	-0.94924	0.406913	-0.898173	0.407523	0.407313	0.183244	0.905373	0.01967	0	0	0.02753	1	1	D S01ED Beta blocking agents	G	p1yr
S01ED	3824	34	26522	455	-0.499068	0.19853	-0.489189	0.199467	0.613123	0.41472	0.906444	0.01195	0	0	0.01419	1	1	D S01ED Beta blocking agents	F	p1yr
S01ED	1304	14	26470	507	-0.801618	0.336631	-0.778081	0.337503	0.459287	0.237022	0.889977	0.01726	0	0	0.02115	1	1	D S01ED Beta blocking agents	G	p2yr
S01ED	3817	41	26470	507	-0.401292	0.178196	-0.418224	0.178627	0.658215	0.463783	0.934159	0.02433	0	0	0.01922	1	1	D S01ED Beta blocking agents	F	p2yr
S01ED	1303	15	386366	6776	-0.705415	0.315344	-0.716498	0.315404	0.48846	0.263242	0.906364	0.02529	0	0	0.02311	1	1	D S01ED Beta blocking agents	C	p5yr
S01ED	1303	15	26358	619	-0.883224	0.318897	-0.889759	0.319555	0.410755	0.219566	0.768423	0.005616	0	0	0.005367	1	1	D S01ED Beta blocking agents	G	p5yr
S01ED	3814	44	26358	619	-0.501595	0.17024	-0.51904	0.170628	0.595092	0.425931	0.831436	0.003217	0	1	0.002353	1	1	D S01ED Beta blocking agents	F	p5yr
S01ED	1308	10	2516	24	-0.941519	0.467088	-0.800264	0.470948	0.44921	0.178423	1.13096	0.0439	0	0	0.08935	1	0	D S01ED Beta blocking agents	A	p1yr
S01EE	1298	20	26322	655	-0.72335	0.291172	-0.683569	0.291647	0.504812	0.285016	0.894108	0.01299	0	0	0.01909	1	1	D S01EE Prostaglandin analogues	G	p6m
S01EE	1295	23	384759	8383	-0.600112	0.265697	-0.597736	0.265875	0.550055	0.326657	0.926233	0.02391	0	0	0.02456	1	1	D S01EE Prostaglandin analogues	C	p1yr
S01EE	1298	20	26322	655	-0.72335	0.291172	-0.683569	0.291647	0.504812	0.285016	0.894108	0.01299	0	0	0.01909	1	1	D S01EE Prostaglandin analogues	G	p1yr
S01EE	1295	23	2494	46	-0.809775	0.319461	-0.744485	0.325884	0.474979	0.250723	0.899819	0.01129	0	0	0.0224	1	1	D S01EE Prostaglandin analogues	A	p1yr
S01EE	1294	24	383778	9364	-0.641363	0.256602	-0.642294	0.256732	0.526084	0.318071	0.870135	0.01244	0	1	0.01236	1	1	D S01EE Prostaglandin analogues	C	p2yr
S01EE	1294	24	26139	838	-0.736073	0.26034	-0.725105	0.260923	0.484274	0.290391	0.807604	0.004697	0	1	0.005456	1	1	D S01EE Prostaglandin analogues	G	p2yr
S01EE	1294	24	2491	49	-0.777727	0.309639	-0.697241	0.315299	0.497957	0.268364	0.923974	0.01206	0	0	0.02707	1	1	D S01EE Prostaglandin analogues	A	p2yr
S01EE	1287	31	381566	11576	-0.551533	0.22187	-0.562421	0.221981	0.569828	0.368802	0.88043	0.01293	0	1	0.01129	1	1	D S01EE Prostaglandin analogues	C	p5yr
S01EE	1287	31	25941	1036	-0.641052	0.225353	-0.641198	0.225852	0.526661	0.338281	0.819945	0.004449	0	0	0.004528	1	1	D S01EE Prostaglandin analogues	G	p5yr
S01EE	1287	31	2480	60	-0.628169	0.272663	-0.581159	0.276289	0.55925	0.325353	0.961297	0.02129	0	0	0.03549	1	1	D S01EE Prostaglandin analogues	A	p5yr
S01XA	3669	189	24852	2125	-0.267089	0.0860213	-0.217228	0.0864405	0.804746	0.679326	0.953323	0.001905	1	1	0.01197	1	1	D S01XA Other ophthalmologicals	F	p1yr
S01XA	3601	257	24332	2645	-0.206798	0.075642	-0.150459	0.0760934	0.860313	0.741111	0.998688	0.006262	0	0	0.04802	1	1	D S01XA Other ophthalmologicals	F	p2yr
S01XA	1207	111	24332	2645	-0.258788	0.120133	-0.205277	0.120816	0.814421	0.642697	1.03203	0.03123	0	0	0.08931	1	0	D S01XA Other ophthalmologicals	G	p2yr
S03BA	3850	8	26846	131	-0.809437	0.374422	-0.788871	0.375723	0.454358	0.217555	0.948912	0.03064	0	0	0.03577	1	1	D S03BA Corticosteroids	F	p1yr
V07AY	3583	275	24783	2194	-0.163076	0.0816164	-0.0954102	0.0821868	0.909	0.773755	1.06788	0.04572	0	0	0.2457	1	0	D V07AY Other non-therapeutic auxiliary products	F	p2yr
J07BB	137	33	19029	7948	-0.685824	0.219062	-0.688079	0.219486	0.502541	0.32684	0.772692	0.001746	1	1	0.001721	1	1	D J07BB Influenza vaccines	H	p10y

## Sheet: C-Drug_Con_Tw-Model-Spe_Top10
						C Controlling for top 10 other protective or harmful drugs
drug	case_notx	case_tx	ctrl_notx	ctrl_tx	beta1	se1	beta2	se2	OR2	conf.low2	conf.high2	p1	p2	sig1	sig2	Full name	Model	Windows
J07BB	1211	107	381898	11244	1.00564	0.111987	-0.287753	0.104543	0.749947	0.611003	0.920488	2.72e-19	0.005915	-1	1	D J07BB Influenza vaccines	C	p1yr
J07BB	3629	229	381898	11244	0.740005	0.0720663	-0.31474	0.0626411	0.729979	0.645639	0.825336	9.853e-25	5.05e-07	-1	1	D J07BB Influenza vaccines	E	p1yr
C09AA	1132	186	2223	317	-0.384683	0.125037	-0.236006	0.136225	0.789776	0.604661	1.03156	0.002109	0.08327	1	0	D C09AA ACE inhibitors, plain [DG:DG01501]	A	p6m
C08CA	1103	215	2217	323	-0.235303	0.116931	-0.0516241	0.126316	0.949686	0.741353	1.21656	0.04426	0.6828	1	0	D C08CA Dihydropyridine derivatives [DG:DG01928]	A	p6m
S01EE	1298	20	2505	35	-0.689225	0.350195	-0.498146	0.374539	0.607656	0.291574	1.26639	0.04913	0.1836	1	0	D S01EE Prostaglandin analogues	A	p6m
J01CA	1161	157	2445	95	1.19073	0.150941	0.827243	0.163676	2.287	1.65921	3.15233	3.952e-15	4.526e-07	-1	-1	D J01CA Penicillins with extended spectrum [DG:DG01780]	A	p6m
J01AA	1198	120	2475	65	1.12842	0.175473	0.720052	0.190383	2.05454	1.41452	2.98415	1.426e-10	0.0001579	-1	-1	D J01AA Tetracyclines [DG:DG01197]	A	p6m
H02AB	1196	122	2474	66	1.17374	0.185581	0.834369	0.20104	2.30336	1.55304	3.41618	2.829e-10	3.393e-05	-1	-1	D H02AB Glucocorticoids	A	p6m
N02AA	1230	88	2513	27	1.53566	0.253746	0.950296	0.274201	2.58648	1.51089	4.42775	1.569e-09	0.0005347	-1	-1	D N02AA Natural opium alkaloids	A	p6m
A06AD	1165	153	2440	100	0.947507	0.159612	0.506174	0.180688	1.65893	1.16407	2.36417	3.174e-09	0.005114	-1	-1	D A06AD Osmotically acting laxatives	A	p6m
A06AB	1210	108	2501	39	1.24306	0.231505	0.593697	0.266942	1.81067	1.07287	3.05586	8.366e-08	0.0262	-1	-1	D A06AB Contact laxatives	A	p6m
A06AA	1251	67	2518	22	1.53156	0.31421	1.16375	0.344653	3.2019	1.62909	6.29319	1.136e-06	0.0007413	-1	-1	D A06AA Softeners, emollients	A	p6m
J01FA	1265	53	2510	30	1.18486	0.2612	0.694547	0.28552	2.0028	1.14426	3.5055	5.902e-06	0.01504	-1	-1	D J01FA Macrolides [DG:DG01551]	A	p6m
J01CR	1273	45	2521	19	1.32453	0.315527	0.782484	0.335614	2.1869	1.13256	4.22274	2.756e-05	0.01978	-1	-1	D J01CR Combinations of penicillins, incl. beta-lactamase inhibitors	A	p6m
N03AX	1186	132	2457	83	0.735242	0.176947	0.483846	0.196197	1.6223	1.10427	2.38335	3.322e-05	0.0137	-1	-1	D N03AX Other antiepileptics	A	p6m
N05CD	145	25	3663	25	2.6501	0.376001	1.7882	0.638554	5.97866	1.7096	20.9081	2.141e-12	0.00513	-1	-1	D N05CD Benzodiazepine derivatives	B	p6m
N02AA	136	34	3607	81	1.9766	0.285723	0.502408	0.434009	1.6527	0.705744	3.87025	5.348e-12	0.2471	-1	0	D N02AA Natural opium alkaloids	B	p6m
A03BB	152	18	3653	35	2.19173	0.386928	0.048608	0.702301	1.04981	0.264924	4.16006	1.583e-08	0.9448	-1	0	D A03BB Belladonna alkaloids, semisynthetic, quaternary ammonium compounds	B	p6m
A06AB	136	34	3575	113	1.48043	0.280773	0.855661	0.3432	2.35293	1.20056	4.61141	1.419e-07	0.0127	-1	-1	D A06AB Contact laxatives	B	p6m
J01CA	136	34	3470	218	1.16345	0.255697	0.565656	0.293892	1.7606	0.989512	3.13258	5.528e-06	0.05434	-1	0	D J01CA Penicillins with extended spectrum [DG:DG01780]	B	p6m
N02BE	96	74	3154	534	0.89681	0.207925	0.223135	0.25378	1.24999	0.76001	2.05586	1.65e-05	0.3793	-1	0	D N02BE Anilides	B	p6m
H02AB	144	26	3526	162	1.2396	0.30759	0.823355	0.343348	2.27813	1.16206	4.46611	5.685e-05	0.01653	-1	-1	D H02AB Glucocorticoids	B	p6m
M05BA	153	17	3600	88	1.38782	0.347777	0.84805	0.397268	2.33509	1.07162	5.08822	6.716e-05	0.03285	-1	-1	D M05BA Bisphosphonates [DG:DG01600]	B	p6m
A06AD	131	39	3474	214	0.967676	0.24582	0.26381	0.299363	1.30188	0.72389	2.34137	8.414e-05	0.3782	-1	0	D A06AD Osmotically acting laxatives	B	p6m
J01AA	148	22	3525	163	1.0634	0.301983	0.652693	0.336826	1.92071	0.992346	3.71756	0.0004343	0.05272	-1	0	D J01AA Tetracyclines [DG:DG01197]	B	p6m
N05CD	145	25	3663	25	2.6501	0.376001	1.40756	0.249161	4.08597	2.50731	6.65858	2.141e-12	1.613e-08	-1	-1	D N05CD Benzodiazepine derivatives	C	p6m
N02AA	136	34	3607	81	1.9766	0.285723	0.618388	0.158684	1.85593	1.35985	2.533	5.348e-12	9.741e-05	-1	-1	D N02AA Natural opium alkaloids	C	p6m
A03BB	152	18	3653	35	2.19173	0.386928	0.597627	0.234076	1.8178	1.14895	2.87603	1.583e-08	0.01068	-1	-1	D A03BB Belladonna alkaloids, semisynthetic, quaternary ammonium compounds	C	p6m
A06AB	136	34	3575	113	1.48043	0.280773	0.944621	0.146886	2.57184	1.92848	3.42984	1.419e-07	1.269e-10	-1	-1	D A06AB Contact laxatives	C	p6m
J01CA	136	34	3470	218	1.16345	0.255697	1.89813	0.106177	6.67341	5.41963	8.21725	5.528e-06	1.9e-71	-1	-1	D J01CA Penicillins with extended spectrum [DG:DG01780]	C	p6m
N02BE	96	74	3154	534	0.89681	0.207925	0.497606	0.0888863	1.64478	1.38181	1.9578	1.65e-05	2.167e-08	-1	-1	D N02BE Anilides	C	p6m
H02AB	144	26	3526	162	1.2396	0.30759	0.632036	0.131162	1.88144	1.45494	2.43296	5.685e-05	1.445e-06	-1	-1	D H02AB Glucocorticoids	C	p6m
M05BA	153	17	3600	88	1.38782	0.347777	0.195711	0.166835	1.21618	0.876972	1.68658	6.716e-05	0.2408	-1	0	D M05BA Bisphosphonates [DG:DG01600]	C	p6m
A06AD	131	39	3474	214	0.967676	0.24582	0.852963	0.114774	2.34659	1.87388	2.93855	8.414e-05	1.074e-13	-1	-1	D A06AD Osmotically acting laxatives	C	p6m
J01AA	148	22	3525	163	1.0634	0.301983	1.4498	0.124938	4.26224	3.3365	5.44485	0.0004343	3.972e-31	-1	-1	D J01AA Tetracyclines [DG:DG01197]	C	p6m
N05CD	145	25	392415	727	4.1464	0.260948	2.3527	0.404537	10.5139	4.75794	23.233	7.774e-57	6.04e-09	-1	-1	D N05CD Benzodiazepine derivatives	D	p6m
J01CA	136	34	388974	4168	2.99622	0.223651	2.03442	0.25966	7.64778	4.5974	12.7221	6.44e-41	4.703e-15	-1	-1	D J01CA Penicillins with extended spectrum [DG:DG01780]	D	p6m
N02AA	136	34	389760	3382	3.1213	0.239541	0.823995	0.34175	2.27959	1.1667	4.45405	8.379e-39	0.0159	-1	-1	D N02AA Natural opium alkaloids	D	p6m
A03BB	152	18	391773	1369	3.46886	0.285931	0.881969	0.445804	2.41565	1.00824	5.78768	7.268e-34	0.04789	-1	-1	D A03BB Belladonna alkaloids, semisynthetic, quaternary ammonium compounds	D	p6m
A06AB	136	34	390079	3063	2.72223	0.244571	1.3513	0.297415	3.86244	2.15626	6.91867	8.991e-29	5.535e-06	-1	-1	D A06AB Contact laxatives	D	p6m
J01AA	148	22	389325	3817	2.58855	0.271123	1.61261	0.31695	5.01587	2.69499	9.33544	1.336e-21	3.622e-07	-1	-1	D J01AA Tetracyclines [DG:DG01197]	D	p6m
A06AD	131	39	383979	9163	2.00432	0.216555	0.719929	0.268056	2.05429	1.21476	3.47402	2.143e-20	0.007237	-1	-1	D A06AD Osmotically acting laxatives	D	p6m
N02BE	96	74	364531	28611	1.68825	0.197281	0.852526	0.221899	2.34557	1.51833	3.62351	1.157e-17	0.0001221	-1	-1	D N02BE Anilides	D	p6m
N05BA	155	15	390891	2251	2.61309	0.317619	1.03704	0.381181	2.82085	1.33634	5.95448	1.923e-16	0.006517	-1	-1	D N05BA Benzodiazepine derivatives [DG:DG01914]	D	p6m
H02AB	144	26	386491	6651	1.9961	0.263353	0.710049	0.30534	2.03409	1.11806	3.70064	3.475e-14	0.02005	-1	-1	D H02AB Glucocorticoids	D	p6m
J01CA	3606	252	388974	4168	1.85799	0.0726458	1.42615	0.078319	4.16266	3.57031	4.85329	3.699e-144	4.646e-74	-1	-1	D J01CA Penicillins with extended spectrum [DG:DG01780]	E	p6m
J01AA	3673	185	389325	3817	1.5484	0.0844652	1.11828	0.0902513	3.05959	2.56354	3.65161	4.959e-75	2.978e-35	-1	-1	D J01AA Tetracyclines [DG:DG01197]	E	p6m
A06AD	3605	253	383979	9163	1.05354	0.0755972	0.565669	0.0829342	1.76063	1.49649	2.07138	3.912e-44	9.073e-12	-1	-1	D A06AD Osmotically acting laxatives	E	p6m
N02BE	3250	608	364531	28611	0.739262	0.0535129	0.472918	0.0563429	1.60467	1.4369	1.79203	2.129e-43	4.731e-17	-1	-1	D N02BE Anilides	E	p6m
A06AB	3711	147	390079	3063	1.38455	0.104865	0.687397	0.114463	1.98853	1.58892	2.48865	8.571e-40	1.91e-09	-1	-1	D A06AB Contact laxatives	E	p6m
N05CD	3808	50	392415	727	2.05805	0.164518	1.41589	0.177686	4.12014	2.90847	5.8366	6.725e-36	1.611e-15	-1	-1	D N05CD Benzodiazepine derivatives	E	p6m
H02AB	3670	188	386491	6651	1.03882	0.0867499	0.438399	0.0943364	1.55022	1.28853	1.86506	4.872e-33	3.366e-06	-1	-1	D H02AB Glucocorticoids	E	p6m
N06DX	3794	64	392296	846	1.98234	0.170065	1.56379	0.175305	4.7769	3.38786	6.73546	2.155e-31	4.665e-19	-1	-1	D N06DX Other anti-dementia drugs	E	p6m
J01XE	3699	159	387245	5897	1.02487	0.0884132	0.662734	0.0916931	1.94009	1.62096	2.32205	4.587e-31	4.919e-13	-1	-1	D J01XE Nitrofuran derivatives	E	p6m
N05BA	3766	92	390891	2251	1.33426	0.116823	0.71877	0.125263	2.05191	1.60522	2.62291	3.313e-30	9.583e-09	-1	-1	D N05BA Benzodiazepine derivatives [DG:DG01914]	E	p6m
C10AA	895	423	1856	684	-0.565976	0.095497	-0.539523	0.104616	0.583026	0.474909	0.715757	3.365e-09	2.634e-07	1	1	D C10AA HMG CoA reductase inhibitors [DG:DG01660]	A	p6m
R03BA	1287	31	2458	82	-0.612637	0.254633	-0.798402	0.272564	0.450047	0.263741	0.767961	0.01618	0.003418	1	1	D R03BA Glucocorticoids	A	p6m
A02BC	2870	988	17691	9286	-0.321774	0.0432595	-0.264929	0.0456138	0.76726	0.701641	0.839017	1.047e-13	6.381e-09	1	1	D A02BC Proton pump inhibitors [DG:DG01646]	F	p6m
M01AE	3731	127	25776	1201	-0.387976	0.0952035	-0.192977	0.0989936	0.824501	0.679085	1.00105	4.608e-05	0.05126	1	0	D M01AE Propionic acid derivatives	F	p6m
G03CA	3747	111	25869	1108	-0.461743	0.0988763	-0.448354	0.0992976	0.638678	0.525723	0.775904	3.026e-06	6.347e-06	1	1	D G03CA Natural and semisynthetic estrogens, plain	F	p6m
N03AX	3643	215	25019	1958	-0.379523	0.0882784	-0.33588	0.0911552	0.714709	0.597771	0.854523	1.72e-05	0.0002294	1	1	D N03AX Other antiepileptics	F	p6m
N02AX	3788	70	26227	750	-0.579729	0.155182	-0.447845	0.157151	0.639004	0.469603	0.869513	0.0001875	0.004378	1	1	D N02AX Other opioids	F	p6m
C07AB	3460	398	22972	4005	-0.24745	0.0692913	-0.211429	0.0699444	0.809427	0.70573	0.92836	0.000356	0.002506	1	1	D C07AB Beta blocking agents, selective	F	p6m
L02AE	3845	13	26718	259	-1.24323	0.377281	-1.22627	0.37778	0.293385	0.139913	0.615202	0.0009845	0.001172	1	1	D L02AE Gonadotropin releasing hormone analogues	F	p6m
R05DA	3756	102	25940	1037	-0.370875	0.11652	-0.312646	0.11839	0.731509	0.580019	0.922567	0.001459	0.008275	1	1	D R05DA Opium alkaloids and derivatives	F	p6m
N06DX	3794	64	26791	186	1.13874	0.182636	0.906594	0.195839	2.47587	1.68664	3.63441	4.576e-10	3.684e-06	-1	-1	D N06DX Other anti-dementia drugs	F	p6m
N05CD	3808	50	26799	178	0.937352	0.185749	0.816487	0.19483	2.26254	1.54436	3.31468	4.529e-07	2.788e-05	-1	-1	D N05CD Benzodiazepine derivatives	F	p6m
J01CA	3606	252	25554	1423	0.351807	0.077925	0.309844	0.0798871	1.36321	1.16563	1.59429	6.364e-06	0.0001053	-1	-1	D J01CA Penicillins with extended spectrum [DG:DG01780]	F	p6m
N06DA	3795	63	26683	294	0.677395	0.17206	0.426355	0.181733	1.53167	1.07267	2.18706	8.27e-05	0.01898	-1	-1	D N06DA Anticholinesterases	F	p6m
N05AX	3826	32	26857	120	0.768115	0.240456	0.369858	0.252803	1.44753	0.881926	2.37587	0.001403	0.1435	-1	0	D N05AX Other antipsychotics	F	p6m
A06AB	3711	147	26155	822	0.332573	0.111545	0.401507	0.116114	1.49407	1.18996	1.87591	0.00287	0.0005452	-1	-1	D A06AB Contact laxatives	F	p6m
J01AA	3673	185	25851	1126	0.268744	0.09114	0.246069	0.0931314	1.27899	1.06559	1.53512	0.003194	0.008242	-1	-1	D J01AA Tetracyclines [DG:DG01197]	F	p6m
R06AE	3723	135	26169	808	0.292746	0.1075	0.310079	0.110277	1.36353	1.09848	1.69253	0.006469	0.004929	-1	-1	D R06AE Piperazine derivatives	F	p6m
A01AB	3791	67	26575	402	0.36888	0.138842	0.380398	0.140847	1.46287	1.10997	1.92796	0.007892	0.006921	-1	-1	D A01AB Antiinfectives and antiseptics for local oral treatment	F	p6m
N05BA	3766	92	26444	533	0.283002	0.126377	0.157229	0.132548	1.17026	0.902513	1.51745	0.02514	0.2356	-1	0	D N05BA Benzodiazepine derivatives [DG:DG01914]	F	p6m
H03AA	3607	251	24575	2402	-0.222705	0.0728647	-0.196609	0.0734259	0.821512	0.711395	0.948673	0.002242	0.007418	1	1	D H03AA Thyroid hormones	F	p6m
A12AX	3565	293	24103	2874	-0.22265	0.074327	-0.192306	0.0755564	0.825054	0.711486	0.956751	0.002742	0.01093	1	1	D A12AX Calcium, combinations with vitamin D and/or other drugs	F	p6m
C10AA	895	423	17425	9552	-0.422274	0.0757922	-0.252743	0.0814884	0.776668	0.662017	0.911174	2.549e-08	0.001927	1	1	D C10AA HMG CoA reductase inhibitors [DG:DG01660]	G	p6m
A02BC	925	393	17691	9286	-0.353462	0.0724149	-0.406998	0.0764356	0.665646	0.573031	0.773229	1.061e-06	1.019e-07	1	1	D A02BC Proton pump inhibitors [DG:DG01646]	G	p6m
C09AA	1132	186	22656	4321	-0.386733	0.100173	-0.272135	0.107689	0.761751	0.6168	0.940766	0.0001133	0.01151	1	1	D C09AA ACE inhibitors, plain [DG:DG01501]	G	p6m
C07AB	1132	186	22972	4005	-0.271937	0.107139	-0.0921011	0.111943	0.912013	0.732337	1.13577	0.01115	0.4107	1	0	D C07AB Beta blocking agents, selective	G	p6m
H03AA	1237	81	24575	2402	-0.40879	0.13289	-0.386199	0.135056	0.679635	0.521568	0.885606	0.002099	0.004245	1	1	D H03AA Thyroid hormones	G	p6m
C08CA	1103	215	22493	4484	-0.229813	0.0929402	-0.0634124	0.0963922	0.938556	0.776976	1.13374	0.01342	0.5106	1	0	D C08CA Dihydropyridine derivatives [DG:DG01928]	G	p6m
S01ED	1309	9	26576	401	-0.94924	0.406913	-0.741223	0.411786	0.476531	0.2126	1.06812	0.01967	0.07187	1	0	D S01ED Beta blocking agents	G	p6m
G04CB	1286	32	26132	845	-0.520371	0.235326	-0.444491	0.238078	0.641151	0.402068	1.0224	0.02702	0.06191	1	0	D G04CB Testosterone-5-alpha reductase inhibitors	G	p6m
J01CA	1161	157	25554	1423	0.975826	0.0996655	0.786952	0.10456	2.19669	1.78963	2.69634	1.337e-22	5.373e-14	-1	-1	D J01CA Penicillins with extended spectrum [DG:DG01780]	G	p6m
J01AA	1198	120	25851	1126	0.882467	0.117155	0.676076	0.124146	1.96615	1.54148	2.50781	5.127e-14	5.199e-08	-1	-1	D J01AA Tetracyclines [DG:DG01197]	G	p6m
A06AB	1210	108	26155	822	0.893655	0.132177	0.604554	0.150454	1.83044	1.36296	2.45826	1.396e-11	5.88e-05	-1	-1	D A06AB Contact laxatives	G	p6m
N05CD	1285	33	26799	178	1.42278	0.220419	0.950704	0.245825	2.58753	1.59819	4.1893	1.101e-10	0.0001102	-1	-1	D N05CD Benzodiazepine derivatives	G	p6m
A06AA	1251	67	26392	585	0.829641	0.160421	0.411903	0.179671	1.50969	1.06156	2.14699	2.336e-07	0.02188	-1	-1	D A06AA Softeners, emollients	G	p6m
N06DX	1287	31	26791	186	1.2275	0.244718	1.09088	0.252677	2.97689	1.81415	4.88484	5.308e-07	1.585e-05	-1	-1	D N06DX Other anti-dementia drugs	G	p6m
R06AE	1236	82	26169	808	0.705623	0.141976	0.551594	0.149446	1.73602	1.29521	2.32685	6.734e-07	0.0002238	-1	-1	D R06AE Piperazine derivatives	G	p6m
A06AD	1165	153	24878	2099	0.495302	0.102638	0.251376	0.113305	1.28579	1.02973	1.60554	1.402e-06	0.02652	-1	-1	D A06AD Osmotically acting laxatives	G	p6m
N02AA	1230	88	26022	955	0.651319	0.135801	0.155173	0.157047	1.16786	0.858434	1.58882	1.626e-06	0.3231	-1	0	D N02AA Natural opium alkaloids	G	p6m
H02AB	1196	122	25408	1569	0.561821	0.117992	0.305969	0.128053	1.35794	1.05652	1.74536	1.931e-06	0.01688	-1	-1	D H02AB Glucocorticoids	G	p6m
N05CD	145	25	26799	178	3.12685	0.283817	2.05086	0.41797	7.77456	3.42675	17.6388	3.626e-28	9.316e-07	-1	-1	D N05CD Benzodiazepine derivatives	H	p6m
N02AA	136	34	26022	955	1.94799	0.235765	0.509308	0.337679	1.66414	0.858508	3.22578	1.492e-16	0.1315	-1	0	D N02AA Natural opium alkaloids	H	p6m
A03BB	152	18	26607	370	2.2843	0.298128	0.496259	0.449698	1.64256	0.680334	3.96573	1.889e-14	0.2698	-1	0	D A03BB Belladonna alkaloids, semisynthetic, quaternary ammonium compounds	H	p6m
A06AB	136	34	26155	822	1.73389	0.242845	0.983457	0.288597	2.67368	1.51861	4.70733	9.575e-13	0.000656	-1	-1	D A06AB Contact laxatives	H	p6m
J01CA	136	34	25554	1423	1.53667	0.22699	1.19531	0.248139	3.30459	2.03185	5.37456	1.316e-11	1.464e-06	-1	-1	D J01CA Penicillins with extended spectrum [DG:DG01780]	H	p6m
J01AA	148	22	25851	1126	1.41188	0.273288	1.04791	0.298458	2.85168	1.5887	5.11871	2.405e-07	0.000447	-1	-1	D J01AA Tetracyclines [DG:DG01197]	H	p6m
N05BA	155	15	26444	533	1.64583	0.323441	0.481883	0.387207	1.61912	0.758006	3.45848	3.633e-07	0.2133	-1	0	D N05BA Benzodiazepine derivatives [DG:DG01914]	H	p6m
N02BE	96	74	22021	4956	0.939422	0.193994	0.373252	0.216376	1.45245	0.950416	2.21967	1.289e-06	0.08454	-1	0	D N02BE Anilides	H	p6m
A06AD	131	39	24878	2099	1.02857	0.217332	0.287304	0.255815	1.33283	0.807263	2.20056	2.226e-06	0.2614	-1	0	D A06AD Osmotically acting laxatives	H	p6m
N06DX	157	13	26791	186	1.70669	0.38147	1.24783	0.424468	3.48279	1.51567	8.00297	7.708e-06	0.003287	-1	-1	D N06DX Other anti-dementia drugs	H	p6m
C09CA	1208	110	24281	2696	-0.330825	0.122655	-0.278801	0.129242	0.75669	0.587358	0.97484	0.006997	0.031	1	1	D C09CA Angiotensin II receptor blockers, plain [DG:DG01495]	G	p6m
S01EE	1298	20	26322	655	-0.72335	0.291172	-0.581928	0.295238	0.55882	0.313295	0.996757	0.01299	0.04873	1	1	D S01EE Prostaglandin analogues	G	p6m
C10AA	854	464	1746	794	-0.69099	0.0943172	-0.615695	0.10548	0.540265	0.439332	0.664386	2.871e-13	5.756e-09	1	1	D C10AA HMG CoA reductase inhibitors [DG:DG01660]	A	p1yr
R03BA	1278	40	2418	122	-0.74423	0.220465	-0.83658	0.229297	0.433189	0.276336	0.679075	0.0007435	0.0002674	1	1	D R03BA Glucocorticoids	A	p1yr
S01EE	1295	23	2494	46	-0.809775	0.319461	-0.548163	0.347617	0.578011	0.292381	1.14267	0.01129	0.1149	1	0	D S01EE Prostaglandin analogues	A	p1yr
A10BA	1178	140	2367	173	-0.444842	0.184637	-0.0937085	0.199317	0.910548	0.616014	1.34591	0.01603	0.6383	1	0	D A10BA Biguanides [DG:DG01684]	A	p1yr
C09AA	1098	220	2172	368	-0.385028	0.118341	-0.263722	0.133356	0.768187	0.59145	0.997737	0.00115	0.04805	1	1	D C09AA ACE inhibitors, plain [DG:DG01501]	A	p1yr
C08CA	1066	252	2159	381	-0.259785	0.110699	-0.035543	0.119922	0.965081	0.762876	1.22088	0.01899	0.767	1	0	D C08CA Dihydropyridine derivatives [DG:DG01928]	A	p1yr
C09CA	1195	123	2338	202	-0.348106	0.14914	-0.202124	0.165611	0.816994	0.590481	1.1304	0.01964	0.2224	1	0	D C09CA Angiotensin II receptor blockers, plain [DG:DG01495]	A	p1yr
S01ED	1308	10	2516	24	-0.941519	0.467088	-0.622391	0.503639	0.53666	0.199924	1.44057	0.0439	0.2166	1	0	D S01ED Beta blocking agents	A	p1yr
A06AD	1101	217	2393	147	0.918504	0.136253	0.686879	0.153128	1.9875	1.47205	2.68344	1.807e-11	7.483e-06	-1	-1	D A06AD Osmotically acting laxatives	A	p1yr
N02AA	1220	98	2497	43	1.23685	0.220144	0.693823	0.243521	2.00135	1.24157	3.22608	2.065e-08	0.004407	-1	-1	D N02AA Natural opium alkaloids	A	p1yr
H02AB	1140	178	2396	144	0.722097	0.140824	0.686331	0.156053	1.98641	1.46283	2.69739	3.079e-07	1.122e-05	-1	-1	D H02AB Glucocorticoids	A	p1yr
A06AA	1243	75	2510	30	1.36319	0.276291	1.01439	0.309467	2.75768	1.50328	5.05878	8.404e-07	0.001055	-1	-1	D A06AA Softeners, emollients	A	p1yr
A06AB	1189	129	2476	64	0.959996	0.195754	0.280698	0.228244	1.32405	0.846374	2.07133	9.776e-07	0.2188	-1	0	D A06AB Contact laxatives	A	p1yr
J01CR	1245	73	2500	40	1.00644	0.235785	0.658885	0.249714	1.93264	1.18448	3.15337	2.016e-05	0.00836	-1	-1	D J01CR Combinations of penicillins, incl. beta-lactamase inhibitors	A	p1yr
J01CA	1064	254	2268	272	0.441149	0.108763	0.240613	0.119879	1.27203	1.00559	1.60905	5.09e-05	0.04481	-1	-1	D J01CA Penicillins with extended spectrum [DG:DG01780]	A	p1yr
J01AA	1159	159	2391	149	0.55485	0.13708	0.371957	0.148582	1.45057	1.08399	1.94112	5.276e-05	0.01234	-1	-1	D J01AA Tetracyclines [DG:DG01197]	A	p1yr
N03AX	1163	155	2430	110	0.637738	0.158865	0.503358	0.175448	1.65427	1.17278	2.33343	6.075e-05	0.004141	-1	-1	D N03AX Other antiepileptics	A	p1yr
R06AE	1218	100	2470	70	0.71409	0.183338	0.427029	0.202625	1.5327	1.03021	2.28027	9.99e-05	0.03514	-1	-1	D R06AE Piperazine derivatives	A	p1yr
N05CD	145	25	3656	32	2.47269	0.358087	1.80546	0.554901	6.08276	2.04936	18.0544	5.84e-12	0.001149	-1	-1	D N05CD Benzodiazepine derivatives	B	p1yr
N02AA	134	36	3583	105	1.8316	0.27388	0.663309	0.385693	1.9412	0.911308	4.13502	2.597e-11	0.08555	-1	0	D N02AA Natural opium alkaloids	B	p1yr
A03BB	152	18	3629	59	1.7103	0.356846	-0.156678	0.600443	0.854979	0.263449	2.77469	1.707e-06	0.7942	-1	0	D A03BB Belladonna alkaloids, semisynthetic, quaternary ammonium compounds	B	p1yr
A06AB	134	36	3531	157	1.13353	0.265477	0.464235	0.322309	1.5908	0.845625	2.99262	2.004e-05	0.1499	-1	0	D A06AB Contact laxatives	B	p1yr
M05BA	151	19	3568	120	1.1978	0.322745	0.844169	0.353941	2.32604	1.16211	4.65574	0.0002091	0.01713	-1	-1	D M05BA Bisphosphonates [DG:DG01600]	B	p1yr
N05BA	150	20	3570	118	1.18029	0.323663	0.206551	0.397002	1.22943	0.564505	2.67756	0.0002692	0.6029	-1	0	D N05BA Benzodiazepine derivatives [DG:DG01914]	B	p1yr
A06AD	121	49	3373	315	0.8186	0.226671	0.218237	0.275429	1.24388	0.72487	2.13451	0.0003084	0.4282	-1	0	D A06AD Osmotically acting laxatives	B	p1yr
N02BE	89	81	2952	736	0.7048	0.203229	0.0653652	0.242084	1.06755	0.664141	1.71599	0.0005301	0.7872	-1	0	D N02BE Anilides	B	p1yr
A11DA	160	10	3657	31	1.53977	0.506813	1.27178	0.555971	3.56721	1.19932	10.6102	0.002396	0.02222	-1	-1	D A11DA Vitamin B1, plain	B	p1yr
N03AX	137	33	3456	232	0.852802	0.281416	0.491766	0.312853	1.6352	0.885494	3.01965	0.002459	0.1161	-1	0	D N03AX Other antiepileptics	B	p1yr
A02BC	862	456	1748	792	-0.257357	0.0846289	-0.346884	0.092149	0.706888	0.590049	0.846862	0.002374	0.0001695	1	1	D A02BC Proton pump inhibitors [DG:DG01646]	A	p1yr
H03AA	1234	84	2353	187	-0.369555	0.157201	-0.361717	0.165387	0.69648	0.5036	0.963232	0.01878	0.0288	1	1	D H03AA Thyroid hormones	A	p1yr
C10AA	854	464	255620	137522	-0.716256	0.0756799	-0.596956	0.0775099	0.550485	0.472899	0.640799	2.971e-21	1.346e-14	1	1	D C10AA HMG CoA reductase inhibitors [DG:DG01660]	C	p1yr
C09AA	1098	220	331703	61439	-0.488408	0.0931624	-0.423043	0.0989998	0.65505	0.539518	0.795323	1.585e-07	1.928e-05	1	1	D C09AA ACE inhibitors, plain [DG:DG01501]	C	p1yr
C08CA	1066	252	327494	65648	-0.278899	0.086789	-0.139332	0.0882225	0.869939	0.731802	1.03415	0.001311	0.1143	1	0	D C08CA Dihydropyridine derivatives [DG:DG01928]	C	p1yr
A10BA	1178	140	369828	23314	-0.400572	0.139206	-0.103979	0.142597	0.901244	0.681496	1.19185	0.004008	0.4659	1	0	D A10BA Biguanides [DG:DG01684]	C	p1yr
H03AA	1234	84	359009	34133	-0.482573	0.128709	-0.485846	0.129159	0.615177	0.477595	0.792392	0.0001773	0.0001688	1	1	D H03AA Thyroid hormones	C	p1yr
S01ED	1308	10	388022	5120	-0.853004	0.390861	-0.701515	0.394773	0.495834	0.22872	1.0749	0.02908	0.07557	1	0	D S01ED Beta blocking agents	C	p1yr
C09CA	1195	123	358901	34241	-0.391624	0.11629	-0.461921	0.121889	0.630072	0.496179	0.800097	0.0007582	0.0001509	1	1	D C09CA Angiotensin II receptor blockers, plain [DG:DG01495]	C	p1yr
A10BJ	1309	9	391309	1833	-1.07885	0.518366	-0.893482	0.520991	0.409228	0.1474	1.13615	0.03741	0.08635	1	0	D A10BJ Glucagon-like peptide-1 receptor (GLP-1) analogues	C	p1yr
A06AD	1101	217	375078	18064	1.18437	0.0877414	0.731087	0.0986808	2.07734	1.71202	2.5206	1.633e-41	1.279e-13	-1	-1	D A06AD Osmotically acting laxatives	C	p1yr
A06AB	1189	129	387741	5401	1.53549	0.117714	0.79773	0.132948	2.2205	1.71113	2.88148	6.981e-39	1.971e-09	-1	-1	D A06AB Contact laxatives	C	p1yr
J01CA	1064	254	366276	26866	0.974794	0.0799004	0.770056	0.0832997	2.15989	1.83453	2.54294	3.148e-34	2.377e-20	-1	-1	D J01CA Penicillins with extended spectrum [DG:DG01780]	C	p1yr
N05CD	1281	37	391787	1355	1.99186	0.186355	1.12205	0.20762	3.07113	2.04443	4.61345	1.162e-26	6.509e-08	-1	-1	D N05CD Benzodiazepine derivatives	C	p1yr
N02AA	1220	98	387416	5726	1.3139	0.127872	0.393143	0.145598	1.48163	1.1138	1.97094	9.191e-25	0.00693	-1	-1	D N02AA Natural opium alkaloids	C	p1yr
J01CF	1180	138	380509	12633	0.996693	0.104448	0.799875	0.106736	2.22526	1.80521	2.74306	1.402e-21	6.697e-14	-1	-1	D J01CF Beta-lactamase resistant penicillins [DG:DG01779]	C	p1yr
A06AA	1243	75	389191	3951	1.38403	0.145393	0.494831	0.161901	1.64022	1.19424	2.25275	1.753e-21	0.00224	-1	-1	D A06AA Softeners, emollients	C	p1yr
J01AA	1159	159	376970	16172	0.915709	0.100013	0.63257	0.103643	1.88244	1.53639	2.30645	5.417e-20	1.04e-09	-1	-1	D J01AA Tetracyclines [DG:DG01197]	C	p1yr
S01EE	1295	23	384759	8383	-0.600112	0.265697	-0.559144	0.269206	0.571698	0.337301	0.968983	0.02391	0.0378	1	1	D S01EE Prostaglandin analogues	C	p1yr
N05BA	1248	70	387526	5616	1.20284	0.136101	0.687595	0.144006	1.98893	1.49982	2.63753	9.794e-19	1.8e-06	-1	-1	D N05BA Benzodiazepine derivatives [DG:DG01914]	C	p1yr
R03BA	1278	40	378273	14869	-0.389094	0.185742	-0.427775	0.186368	0.651958	0.452462	0.939414	0.03619	0.02172	1	1	D R03BA Glucocorticoids	C	p1yr
C09AA	135	35	331703	61439	-0.55436	0.242455	-0.387137	0.248463	0.678998	0.417231	1.105	0.02223	0.1192	1	0	D C09AA ACE inhibitors, plain [DG:DG01501]	D	p1yr
C08CA	133	37	327494	65648	-0.462721	0.232403	-0.345712	0.238953	0.707716	0.443058	1.13047	0.04648	0.148	1	0	D C08CA Dihydropyridine derivatives [DG:DG01928]	D	p1yr
N05CD	145	25	391787	1355	3.39524	0.25767	1.88446	0.383471	6.5828	3.10455	13.958	1.218e-39	8.918e-07	-1	-1	D N05CD Benzodiazepine derivatives	D	p1yr
N02AA	134	36	387416	5726	2.55738	0.231916	0.882435	0.301372	2.41678	1.33877	4.36281	2.852e-28	0.003411	-1	-1	D N02AA Natural opium alkaloids	D	p1yr
A06AB	134	36	387741	5401	2.26436	0.234731	1.1667	0.266182	3.21139	1.90598	5.41089	5.108e-22	1.17e-05	-1	-1	D A06AB Contact laxatives	D	p1yr
A03BB	152	18	390072	3070	2.57824	0.281024	0.298891	0.412475	1.34836	0.600767	3.02627	4.56e-20	0.4687	-1	0	D A03BB Belladonna alkaloids, semisynthetic, quaternary ammonium compounds	D	p1yr
A06AD	121	49	375078	18064	1.60003	0.203273	0.478503	0.242728	1.61366	1.00277	2.5967	3.518e-15	0.04868	-1	-1	D A06AD Osmotically acting laxatives	D	p1yr
N05BA	150	20	387526	5616	2.03411	0.279488	0.920266	0.307601	2.50996	1.37352	4.58668	3.394e-13	0.002774	-1	-1	D N05BA Benzodiazepine derivatives [DG:DG01914]	D	p1yr
J01XE	139	31	374700	18442	1.51781	0.231057	0.92822	0.243353	2.53	1.57028	4.07628	5.072e-11	0.0001366	-1	-1	D J01XE Nitrofuran derivatives	D	p1yr
N02BE	89	81	343710	49432	1.27649	0.194896	0.560056	0.215525	1.75077	1.14756	2.67107	5.777e-11	0.009362	-1	-1	D N02BE Anilides	D	p1yr
J01CA	128	42	366276	26866	1.28365	0.20964	0.677387	0.22528	1.96873	1.26598	3.06157	9.184e-10	0.00264	-1	-1	D J01CA Penicillins with extended spectrum [DG:DG01780]	D	p1yr
J01CF	141	29	380509	12633	1.4752	0.243176	1.10555	0.255539	3.0209	1.83071	4.98485	1.309e-09	1.516e-05	-1	-1	D J01CF Beta-lactamase resistant penicillins [DG:DG01779]	D	p1yr
C10AA	91	79	255620	137522	-0.683237	0.197109	-0.520265	0.2016	0.594363	0.400359	0.882378	0.0005277	0.009861	1	1	D C10AA HMG CoA reductase inhibitors [DG:DG01660]	D	p1yr
C09AA	3270	588	331703	61439	-0.230727	0.0531087	-0.227359	0.0558221	0.796635	0.714074	0.888741	1.397e-05	4.643e-05	1	1	D C09AA ACE inhibitors, plain [DG:DG01501]	E	p1yr
C10AA	2600	1258	255620	137522	-0.180994	0.0420699	-0.154212	0.0427629	0.85709	0.788182	0.932023	1.691e-05	0.0003107	1	1	D C10AA HMG CoA reductase inhibitors [DG:DG01660]	E	p1yr
H03AA	3587	271	359009	34133	-0.217739	0.0658626	-0.221498	0.0660117	0.801318	0.704069	0.911998	0.0009466	0.0007925	1	1	D H03AA Thyroid hormones	E	p1yr
A10AE	3821	37	390087	3055	-0.528652	0.230525	-0.498499	0.231153	0.607442	0.386141	0.955572	0.02183	0.03104	1	1	D A10AE Insulins and analogues for injection, long-acting	E	p1yr
J01CA	3332	526	366276	26866	0.672873	0.0509662	0.512886	0.0525645	1.6701	1.50661	1.85134	8.672e-40	1.727e-22	-1	-1	D J01CA Penicillins with extended spectrum [DG:DG01780]	E	p1yr
A06AB	3665	193	387741	5401	1.10902	0.0915779	0.666379	0.09749	1.94717	1.6085	2.35716	9.467e-34	8.192e-12	-1	-1	D A06AB Contact laxatives	E	p1yr
N02BE	3041	817	343710	49432	0.525324	0.0466226	0.351636	0.0485566	1.42139	1.29236	1.56331	1.917e-29	4.436e-13	-1	-1	D N02BE Anilides	E	p1yr
A06AD	3494	364	375078	18064	0.692792	0.0643489	0.345622	0.0695715	1.41287	1.23277	1.61928	5.015e-27	6.772e-07	-1	-1	D A06AD Osmotically acting laxatives	E	p1yr
N06DX	3792	66	392134	1008	1.81132	0.169377	1.45623	0.170112	4.28975	3.07349	5.98732	1.095e-26	1.129e-17	-1	-1	D N06DX Other anti-dementia drugs	E	p1yr
N05CD	3801	57	391787	1355	1.54929	0.150211	1.13569	0.155025	3.11331	2.29755	4.21872	6.129e-25	2.379e-13	-1	-1	D N05CD Benzodiazepine derivatives	E	p1yr
C09CA	3533	325	358901	34241	-0.142405	0.0671113	-0.196723	0.0699113	0.821418	0.716235	0.942048	0.03384	0.004895	1	1	D C09CA Angiotensin II receptor blockers, plain [DG:DG01495]	E	p1yr
J01XE	3541	317	374700	18442	0.622647	0.062459	0.454453	0.0635483	1.57531	1.39083	1.78426	2.099e-23	8.611e-13	-1	-1	D J01XE Nitrofuran derivatives	E	p1yr
J01CF	3589	269	380509	12633	0.672526	0.0690514	0.545176	0.0698522	1.72491	1.50421	1.978	2.057e-22	5.978e-15	-1	-1	D J01CF Beta-lactamase resistant penicillins [DG:DG01779]	E	p1yr
J01AA	3550	308	376970	16172	0.619056	0.0652512	0.444812	0.0666568	1.5602	1.36912	1.77794	2.384e-21	2.507e-11	-1	-1	D J01AA Tetracyclines [DG:DG01197]	E	p1yr
J07BB	3629	229	23649	3328	-0.664476	0.0747113	-0.499139	0.0655094	0.607053	0.533903	0.690224	6.214e-19	2.622e-14	1	1	D J07BB Influenza vaccines	F	p1yr
A02BC	2610	1248	15851	11126	-0.26503	0.0395101	-0.218769	0.0419426	0.803508	0.740094	0.872354	2.008e-11	1.841e-07	1	1	D A02BC Proton pump inhibitors [DG:DG01646]	F	p1yr
G03CA	3679	179	25257	1720	-0.397705	0.0784991	-0.34978	0.0789439	0.704843	0.6038	0.822796	4.078e-07	9.423e-06	1	1	D G03CA Natural and semisynthetic estrogens, plain	F	p1yr
N03AX	3593	265	24621	2356	-0.3512	0.0794964	-0.322608	0.0817356	0.724258	0.617045	0.850099	1e-05	7.932e-05	1	1	D N03AX Other antiepileptics	F	p1yr
N02AX	3753	105	25926	1051	-0.465822	0.123557	-0.367935	0.125458	0.692162	0.54127	0.88512	0.0001635	0.003362	1	1	D N02AX Other opioids	F	p1yr
J01MA	3821	37	26450	527	-0.709829	0.193237	-0.708102	0.194852	0.492578	0.33621	0.721672	0.0002398	0.0002795	1	1	D J01MA Fluoroquinolones [DG:DG01549]	F	p1yr
C05AX	3805	53	26390	587	-0.582456	0.159032	-0.534274	0.159896	0.586095	0.428409	0.80182	0.0002502	0.0008346	1	1	D C05AX Other agents for treatment of hemorrhoids and anal fissures for topical use	F	p1yr
R05DA	3668	190	25218	1759	-0.30051	0.086928	-0.272922	0.088699	0.761152	0.639687	0.905681	0.000547	0.002093	1	1	D R05DA Opium alkaloids and derivatives	F	p1yr
M01AE	3600	258	24862	2115	-0.230299	0.0676519	-0.0747196	0.0712515	0.928004	0.807045	1.06709	0.0006645	0.2943	1	0	D M01AE Propionic acid derivatives	F	p1yr
C07AB	3406	452	22562	4415	-0.222498	0.0660707	-0.20117	0.0667438	0.817773	0.717494	0.932068	0.0007592	0.00258	1	1	D C07AB Beta blocking agents, selective	F	p1yr
N06DX	3792	66	26775	202	1.08185	0.180291	0.808648	0.194218	2.24487	1.53414	3.28486	1.988e-09	3.141e-05	-1	-1	D N06DX Other anti-dementia drugs	F	p1yr
N05CD	3801	57	26745	232	0.835438	0.168887	0.771423	0.173366	2.16284	1.53975	3.03809	7.586e-07	8.63e-06	-1	-1	D N05CD Benzodiazepine derivatives	F	p1yr
N06DA	3789	69	26651	326	0.702633	0.16404	0.445298	0.174069	1.56095	1.10973	2.19566	1.847e-05	0.01053	-1	-1	D N06DA Anticholinesterases	F	p1yr
D01BA	3827	31	26860	117	0.678732	0.201337	0.688652	0.202893	1.99103	1.33773	2.96338	0.0007495	0.0006893	-1	-1	D D01BA Antifungals for systemic use	F	p1yr
N05AX	3819	39	26835	142	0.716769	0.22121	0.295364	0.23205	1.34361	0.8526	2.11741	0.001196	0.2031	-1	0	D N05AX Other antipsychotics	F	p1yr
A06AB	3665	193	25854	1123	0.300211	0.0976098	0.347266	0.101314	1.41519	1.16031	1.72607	0.002102	0.0006097	-1	-1	D A06AB Contact laxatives	F	p1yr
J01CA	3332	526	23451	3526	0.158789	0.055197	0.183806	0.0560782	1.20178	1.07669	1.34141	0.004021	0.001048	-1	-1	D J01CA Penicillins with extended spectrum [DG:DG01780]	F	p1yr
A09AB	3847	11	26952	25	1.04104	0.415029	0.890362	0.424939	2.43601	1.05915	5.60276	0.01213	0.03616	-1	-1	D A09AB Acid preparations	F	p1yr
M02AA	3539	319	24608	2369	0.169126	0.0705779	0.235106	0.0719187	1.26504	1.09872	1.45655	0.01657	0.00108	-1	-1	D M02AA Antiinflammatory preparations, non-steroids for topical use	F	p1yr
D09AA	3833	25	26856	121	0.570747	0.268036	0.527819	0.271028	1.69523	0.996599	2.88362	0.03323	0.05149	-1	0	D D09AA Medicated dressings with antiinfectives	F	p1yr
C10AA	854	464	16421	10556	-0.465819	0.0745245	-0.329011	0.0779804	0.719635	0.617636	0.838479	4.149e-10	2.46e-05	1	1	D C10AA HMG CoA reductase inhibitors [DG:DG01660]	G	p1yr
A02BC	862	456	15851	11126	-0.412951	0.0683675	-0.449271	0.0709519	0.638093	0.555248	0.733299	1.559e-09	2.456e-10	1	1	D A02BC Proton pump inhibitors [DG:DG01646]	G	p1yr
J07BB	1211	107	23649	3328	-0.455315	0.11404	-0.482837	0.106501	0.617031	0.500782	0.760265	6.552e-05	5.822e-06	1	1	D J07BB Influenza vaccines	G	p1yr
C09AA	1098	220	22100	4877	-0.342168	0.0941613	-0.266618	0.100222	0.765966	0.629356	0.932228	0.0002797	0.007812	1	1	D C09AA ACE inhibitors, plain [DG:DG01501]	G	p1yr
H03AA	1234	84	24401	2576	-0.451533	0.130723	-0.4292	0.132215	0.65103	0.502405	0.843621	0.0005529	0.001171	1	1	D H03AA Thyroid hormones	G	p1yr
C09CA	1195	123	23977	3000	-0.367293	0.118531	-0.334573	0.124132	0.715644	0.561088	0.912773	0.001946	0.007037	1	1	D C09CA Angiotensin II receptor blockers, plain [DG:DG01495]	G	p1yr
R03BA	1278	40	25749	1228	-0.487698	0.187835	-0.479307	0.188916	0.619212	0.42759	0.896709	0.009425	0.01118	1	1	D R03BA Glucocorticoids	G	p1yr
S01ED	1308	10	26522	455	-1.01931	0.394876	-0.835686	0.400973	0.433577	0.19758	0.951459	0.009847	0.03716	1	1	D S01ED Beta blocking agents	G	p1yr
C08CA	1066	252	21802	5175	-0.225025	0.0881175	-0.0804877	0.0909129	0.922666	0.772069	1.10264	0.01066	0.376	1	0	D C08CA Dihydropyridine derivatives [DG:DG01928]	G	p1yr
S01EE	1295	23	26236	741	-0.685195	0.269925	-0.535015	0.274331	0.585661	0.342078	1.00269	0.01114	0.05116	1	0	D S01EE Prostaglandin analogues	G	p1yr
N05CD	1281	37	26745	232	1.33806	0.202337	0.937674	0.223848	2.55403	1.64694	3.96073	3.833e-11	2.812e-05	-1	-1	D N05CD Benzodiazepine derivatives	G	p1yr
A06AB	1189	129	25854	1123	0.785105	0.120496	0.517041	0.136523	1.67706	1.28332	2.1916	7.36e-11	0.0001527	-1	-1	D A06AB Contact laxatives	G	p1yr
J01CA	1064	254	23451	3526	0.454077	0.0823269	0.397166	0.085171	1.4876	1.25889	1.75787	3.507e-08	3.128e-06	-1	-1	D J01CA Penicillins with extended spectrum [DG:DG01780]	G	p1yr
A06AD	1101	217	23975	3002	0.474176	0.08933	0.28938	0.099251	1.3356	1.09949	1.62242	1.116e-07	0.003552	-1	-1	D A06AD Osmotically acting laxatives	G	p1yr
N06DX	1285	33	26775	202	1.19216	0.239716	0.926332	0.248596	2.52523	1.55127	4.1107	6.623e-07	0.0001947	-1	-1	D N06DX Other anti-dementia drugs	G	p1yr
A06AA	1243	75	26198	779	0.655905	0.15002	0.287584	0.165701	1.3332	0.963485	1.84479	1.235e-05	0.08265	-1	0	D A06AA Softeners, emollients	G	p1yr
J01AA	1159	159	24705	2272	0.424752	0.10288	0.373338	0.105777	1.45258	1.18059	1.78723	3.66e-05	0.000417	-1	-1	D J01AA Tetracyclines [DG:DG01197]	G	p1yr
R06AE	1218	100	25795	1182	0.522702	0.1272	0.428547	0.132649	1.53502	1.18359	1.99082	3.98e-05	0.001236	-1	-1	D R06AE Piperazine derivatives	G	p1yr
N05BA	1248	70	26064	913	0.515732	0.140988	0.205466	0.151699	1.2281	0.912223	1.65335	0.0002547	0.1756	-1	0	D N05BA Benzodiazepine derivatives [DG:DG01914]	G	p1yr
N02AA	1220	98	25729	1248	0.464501	0.129041	0.0455352	0.146389	1.04659	0.785532	1.3944	0.0003192	0.7558	-1	0	D N02AA Natural opium alkaloids	G	p1yr
J07BB	162	8	23649	3328	-1.17924	0.410212	-1.37008	0.411902	0.254087	0.113333	0.569654	0.004047	0.0008815	1	1	D J07BB Influenza vaccines	H	p1yr
N05CD	145	25	26745	232	2.82946	0.278514	1.83376	0.389928	6.25735	2.91386	13.4373	3.334e-24	2.579e-06	-1	-1	D N05CD Benzodiazepine derivatives	H	p1yr
N02AA	134	36	25729	1248	1.73952	0.229981	0.556795	0.310183	1.74507	0.950108	3.20518	4.04e-14	0.07266	-1	0	D N02AA Natural opium alkaloids	H	p1yr
A06AB	134	36	25854	1123	1.51531	0.233315	0.798488	0.277589	2.22218	1.28969	3.8289	8.463e-11	0.004024	-1	-1	D A06AB Contact laxatives	H	p1yr
A03BB	152	18	26410	567	1.81979	0.292264	0.422383	0.404484	1.52559	0.69044	3.37094	4.838e-10	0.2964	-1	0	D A03BB Belladonna alkaloids, semisynthetic, quaternary ammonium compounds	H	p1yr
N05BA	150	20	26064	913	1.4506	0.283663	0.464222	0.33738	1.59078	0.821141	3.08177	3.179e-07	0.1688	-1	0	D N05BA Benzodiazepine derivatives [DG:DG01914]	H	p1yr
A06AD	121	49	23975	3002	0.920464	0.203716	0.239822	0.243535	1.27102	0.788582	2.04861	6.258e-06	0.3248	-1	0	D A06AD Osmotically acting laxatives	H	p1yr
A11DA	160	10	26666	311	1.71351	0.406006	1.10732	0.459667	3.02624	1.22918	7.45058	2.447e-05	0.016	-1	-1	D A11DA Vitamin B1, plain	H	p1yr
N02BE	89	81	20616	6361	0.809295	0.191786	0.235462	0.216449	1.26549	0.82796	1.93424	2.453e-05	0.2767	-1	0	D N02BE Anilides	H	p1yr
N06DX	157	13	26775	202	1.59834	0.385208	1.03789	0.427738	2.82327	1.2208	6.52919	3.345e-05	0.01525	-1	-1	D N06DX Other anti-dementia drugs	H	p1yr
M05BA	151	19	25664	1313	1.01156	0.286722	0.813624	0.299291	2.25607	1.25483	4.05621	0.0004194	0.006562	-1	-1	D M05BA Bisphosphonates [DG:DG01600]	H	p1yr
N02AA	130	40	3536	152	1.62798	0.255183	0.469548	0.208262	1.59927	1.06315	2.40575	1.986e-10	0.02421	-1	-1	D N02AA Natural opium alkaloids	A	p2yr
A06AB	126	44	3488	200	1.17996	0.247804	0.238781	0.209461	1.2697	0.842076	1.91448	1.991e-06	0.2544	-1	0	D A06AB Contact laxatives	A	p2yr
N05BA	145	25	3505	183	1.00479	0.285341	0.282523	0.181483	1.32647	0.929332	1.89333	0.0004343	0.1196	-1	0	D N05BA Benzodiazepine derivatives [DG:DG01914]	A	p2yr
A06AD	112	58	3275	413	0.735754	0.216592	0.610422	0.13805	1.84121	1.40461	2.41351	0.0006883	1.006e-05	-1	-1	D A06AD Osmotically acting laxatives	A	p2yr
J07BB	160	10	3324	364	-0.916821	0.376844	-0.952207	0.38759	0.385888	0.180484	0.825057	0.01502	0.01406	1	1	D J07BB Influenza vaccines	B	p2yr
R01AD	160	10	3282	406	-0.95479	0.422822	-0.813363	0.434675	0.443365	0.189081	1.03962	0.02399	0.06139	1	0	D R01AD Corticosteroids	B	p2yr
N05CD	145	25	3651	37	2.32297	0.349408	1.59833	0.544948	4.94476	1.69878	14.393	3.384e-11	0.003377	-1	-1	D N05CD Benzodiazepine derivatives	B	p2yr
N02AA	130	40	3536	152	1.62798	0.255183	0.777433	0.333805	2.17588	1.13086	4.18659	1.986e-10	0.01991	-1	-1	D N02AA Natural opium alkaloids	B	p2yr
A06AB	126	44	3488	200	1.17996	0.247804	0.684687	0.29856	1.98315	1.10444	3.561	1.991e-06	0.02188	-1	-1	D A06AB Contact laxatives	B	p2yr
A03BB	152	18	3594	94	1.28655	0.336242	-0.391471	0.560201	0.676062	0.225419	2.0276	0.0001322	0.4847	-1	0	D A03BB Belladonna alkaloids, semisynthetic, quaternary ammonium compounds	B	p2yr
N05BA	145	25	3505	183	1.00479	0.285341	-0.0309551	0.360648	0.969519	0.478052	1.96624	0.0004343	0.9316	-1	0	D N05BA Benzodiazepine derivatives [DG:DG01914]	B	p2yr
A06AD	112	58	3275	413	0.735754	0.216592	0.14783	0.262265	1.15932	0.693251	1.93871	0.0006883	0.573	-1	0	D A06AD Osmotically acting laxatives	B	p2yr
A11CC	147	23	3491	197	1.00237	0.308048	0.65152	0.331396	1.91846	1.00179	3.67389	0.001148	0.04937	-1	-1	D A11CC Vitamin D and analogues	B	p2yr
N02BE	78	92	2736	952	0.637527	0.20119	0.138949	0.233214	1.14907	0.727394	1.81518	0.001543	0.5513	-1	0	D N02BE Anilides	B	p2yr
N06DX	152	18	3628	60	1.12669	0.37235	0.50674	0.42691	1.65987	0.718742	3.83333	0.002496	0.2353	-1	0	D N06DX Other anti-dementia drugs	B	p2yr
J01CF	125	45	3283	405	0.674755	0.232014	0.378719	0.251018	1.46041	0.892773	2.38897	0.003655	0.1315	-1	0	D J01CF Beta-lactamase resistant penicillins [DG:DG01779]	B	p2yr
C10AA	821	497	249370	143772	-0.70364	0.0750709	-0.634175	0.0769279	0.530373	0.456142	0.616684	7.085e-21	1.674e-16	1	1	D C10AA HMG CoA reductase inhibitors [DG:DG01660]	C	p2yr
C09AA	1074	244	327125	66017	-0.461719	0.0899305	-0.393998	0.0956242	0.674356	0.559105	0.813364	2.835e-07	3.785e-05	1	1	D C09AA ACE inhibitors, plain [DG:DG01501]	C	p2yr
H03AA	1233	85	358601	34541	-0.485569	0.128112	-0.487534	0.128614	0.614139	0.477298	0.790212	0.0001505	0.0001503	1	1	D H03AA Thyroid hormones	C	p2yr
C08CA	1034	284	321678	71464	-0.246055	0.0836509	-0.117847	0.0852903	0.888832	0.752005	1.05056	0.003267	0.1671	1	0	D C08CA Dihydropyridine derivatives [DG:DG01928]	C	p2yr
C09CA	1177	141	357251	35891	-0.319795	0.111023	-0.373654	0.116442	0.688215	0.547782	0.864649	0.003971	0.001332	1	1	D C09CA Angiotensin II receptor blockers, plain [DG:DG01495]	C	p2yr
A10BA	1165	153	368443	24699	-0.37883	0.137289	-0.142703	0.141427	0.867011	0.657115	1.14395	0.005792	0.313	1	0	D A10BA Biguanides [DG:DG01684]	C	p2yr
S01EE	1294	24	383778	9364	-0.641363	0.256602	-0.672435	0.257563	0.510464	0.308125	0.845675	0.01244	0.009034	1	1	D S01EE Prostaglandin analogues	C	p2yr
R03BA	1264	54	374491	18651	-0.330699	0.162808	-0.351525	0.163245	0.703614	0.510951	0.968924	0.04223	0.03129	1	1	D R03BA Glucocorticoids	C	p2yr
A06AB	1157	161	385083	8059	1.4119	0.106098	0.758371	0.120656	2.1348	1.68521	2.70433	2.134e-40	3.273e-10	-1	-1	D A06AB Contact laxatives	C	p2yr
A06AD	1045	273	365925	27217	0.983794	0.0810106	0.519379	0.0922225	1.68098	1.40302	2.01402	6.258e-34	1.785e-08	-1	-1	D A06AD Osmotically acting laxatives	C	p2yr
N02AA	1197	121	384564	8578	1.15884	0.115278	0.452418	0.128528	1.57211	1.22202	2.02249	9.009e-24	0.0004316	-1	-1	D N02AA Natural opium alkaloids	C	p2yr
N06DX	1278	40	392070	1072	2.07689	0.215879	1.25723	0.231973	3.51566	2.23126	5.5394	6.581e-22	5.973e-08	-1	-1	D N06DX Other anti-dementia drugs	C	p2yr
A06AA	1226	92	387392	5750	1.25761	0.130884	0.469885	0.144277	1.59981	1.20575	2.12265	7.396e-22	0.001127	-1	-1	D A06AA Softeners, emollients	C	p2yr
N05CD	1280	38	391336	1806	1.72554	0.184676	0.929409	0.201322	2.53301	1.70715	3.7584	9.361e-21	3.903e-06	-1	-1	D N05CD Benzodiazepine derivatives	C	p2yr
N05BA	1217	101	381996	11146	0.925385	0.114299	0.481669	0.120643	1.61877	1.27789	2.05059	5.687e-16	6.539e-05	-1	-1	D N05BA Benzodiazepine derivatives [DG:DG01914]	C	p2yr
J01CA	956	362	336972	56170	0.56972	0.0705982	0.47363	0.0721729	1.60581	1.39399	1.84982	7.055e-16	5.3e-11	-1	-1	D J01CA Penicillins with extended spectrum [DG:DG01780]	C	p2yr
N06DA	1276	42	390838	2304	1.42312	0.199903	0.75926	0.212717	2.13669	1.40824	3.24196	1.089e-12	0.0003579	-1	-1	D N06DA Anticholinesterases	C	p2yr
N02BE	862	456	325789	67353	0.501277	0.0712545	0.202923	0.0765066	1.22498	1.0544	1.42315	1.996e-12	0.007993	-1	-1	D N02BE Anilides	C	p2yr
C10AA	86	84	249370	143772	-0.694608	0.197566	-0.621356	0.204559	0.537216	0.359772	0.802176	0.0004384	0.002385	1	1	D C10AA HMG CoA reductase inhibitors [DG:DG01660]	D	p2yr
J07BB	160	10	342364	50778	-1.05023	0.357483	-1.1135	0.359468	0.328408	0.162343	0.664346	0.003305	0.001951	1	1	D J07BB Influenza vaccines	D	p2yr
C09AA	131	39	327125	66017	-0.528387	0.233934	-0.450936	0.243473	0.637031	0.395289	1.02661	0.0239	0.06401	1	0	D C09AA ACE inhibitors, plain [DG:DG01501]	D	p2yr
R01AD	160	10	354259	38883	-0.819468	0.400261	-0.798137	0.402682	0.450167	0.20446	0.991147	0.04063	0.04747	1	1	D R01AD Corticosteroids	D	p2yr
A10BA	152	18	368443	24699	-0.786474	0.391425	-0.501157	0.399822	0.60583	0.276707	1.32642	0.04451	0.21	1	0	D A10BA Biguanides [DG:DG01684]	D	p2yr
N05CD	145	25	391336	1806	3.16187	0.256399	1.75801	0.362948	5.8009	2.84808	11.8151	6.196e-35	1.275e-06	-1	-1	D N05CD Benzodiazepine derivatives	D	p2yr
N02AA	130	40	384564	8578	2.34239	0.219619	0.919292	0.279134	2.50751	1.45092	4.33355	1.485e-26	0.00099	-1	-1	D N02AA Natural opium alkaloids	D	p2yr
A06AB	126	44	385083	8059	2.17907	0.217379	1.2672	0.250864	3.5509	2.17171	5.80597	1.2e-23	4.389e-07	-1	-1	D A06AB Contact laxatives	D	p2yr
A03BB	152	18	387759	5383	2.10406	0.277629	0.198113	0.394288	1.2191	0.562885	2.64033	3.498e-14	0.6153	-1	0	D A03BB Belladonna alkaloids, semisynthetic, quaternary ammonium compounds	D	p2yr
N06DX	152	18	392070	1072	2.54518	0.347995	1.55498	0.364374	4.73498	2.31826	9.67108	2.601e-13	1.977e-05	-1	-1	D N06DX Other anti-dementia drugs	D	p2yr
A06AD	112	58	365925	27217	1.38585	0.196692	0.335473	0.236284	1.3986	0.880174	2.22239	1.847e-12	0.1557	-1	0	D A06AD Osmotically acting laxatives	D	p2yr
N05BA	145	25	381996	11146	1.71092	0.251453	0.678354	0.283721	1.97063	1.13006	3.43645	1.018e-11	0.01681	-1	-1	D N05BA Benzodiazepine derivatives [DG:DG01914]	D	p2yr
N02BE	78	92	325789	67353	1.2188	0.193559	0.541253	0.218627	1.71816	1.11935	2.6373	3.042e-10	0.0133	-1	-1	D N02BE Anilides	D	p2yr
J01CF	125	45	363520	29622	1.18995	0.20467	0.909431	0.213877	2.48291	1.63271	3.77584	6.105e-09	2.118e-05	-1	-1	D J01CF Beta-lactamase resistant penicillins [DG:DG01779]	D	p2yr
A11DA	160	10	391276	1866	2.01875	0.396047	1.35909	0.419521	3.89266	1.7106	8.85817	3.448e-07	0.001197	-1	-1	D A11DA Vitamin B1, plain	D	p2yr
C09AA	3209	649	327125	66017	-0.207374	0.0513484	-0.16936	0.0519445	0.844205	0.762487	0.93468	5.379e-05	0.001113	1	1	D C09AA ACE inhibitors, plain [DG:DG01501]	E	p2yr
C10AA	2514	1344	249370	143772	-0.14982	0.0415283	-0.153162	0.0420758	0.857991	0.790073	0.931746	0.000309	0.0002725	1	1	D C10AA HMG CoA reductase inhibitors [DG:DG01660]	E	p2yr
H03AA	3585	273	358601	34541	-0.225512	0.0656614	-0.231718	0.0657867	0.79317	0.697217	0.902327	0.0005938	0.0004279	1	1	D H03AA Thyroid hormones	E	p2yr
J07BB	3484	374	342364	50778	-0.19039	0.0569614	-0.287426	0.0561771	0.750192	0.671977	0.837511	0.0008305	3.115e-07	1	1	D J07BB Influenza vaccines	E	p2yr
A10AE	3816	42	389850	3292	-0.443401	0.214439	-0.405844	0.214803	0.666414	0.437424	1.01528	0.03867	0.05884	1	0	D A10AE Insulins and analogues for injection, long-acting	E	p2yr
J07CA	3777	81	382676	10466	-0.21593	0.107107						0.0438		1		D J07CA Bacterial and viral vaccines, combined	E	p2yr
N06DX	3780	78	392070	1072	2.0019	0.154956	1.42153	0.167847	4.14344	2.98187	5.75749	3.574e-38	2.479e-17	-1	-1	D N06DX Other anti-dementia drugs	E	p2yr
A06AB	3614	244	385083	8059	0.950941	0.0815868	0.596322	0.0871522	1.81543	1.53037	2.15359	2.175e-31	7.804e-12	-1	-1	D A06AB Contact laxatives	E	p2yr
J01CA	2998	860	336972	56170	0.468102	0.0412145	0.355424	0.0424793	1.42679	1.3128	1.55066	6.864e-30	5.93e-17	-1	-1	D J01CA Penicillins with extended spectrum [DG:DG01780]	E	p2yr
N02BE	2814	1044	325789	67353	0.474984	0.0419457	0.29207	0.0446603	1.3392	1.22696	1.4617	1.011e-29	6.167e-11	-1	-1	D N02BE Anilides	E	p2yr
N06DA	3776	82	390838	2304	1.30192	0.143249	0.754823	0.154708	2.12724	1.57082	2.88074	1.009e-19	1.067e-06	-1	-1	D N06DA Anticholinesterases	E	p2yr
N05CD	3796	62	391336	1806	1.30731	0.144412	0.981767	0.148277	2.66917	1.99601	3.56936	1.401e-19	3.568e-11	-1	-1	D N05CD Benzodiazepine derivatives	E	p2yr
A06AD	3387	471	365925	27217	0.510405	0.0573722	0.183261	0.0623254	1.20113	1.06301	1.35719	5.793e-19	0.003278	-1	-1	D A06AD Osmotically acting laxatives	E	p2yr
J01XE	3362	496	356872	36270	0.423626	0.0508094	0.282227	0.0517558	1.32608	1.19816	1.46766	7.609e-17	4.955e-08	-1	-1	D J01XE Nitrofuran derivatives	E	p2yr
M02AA	3318	540	356016	37126	0.423721	0.0519105	0.256276	0.0538067	1.29211	1.16278	1.43582	3.29e-16	1.909e-06	-1	-1	D M02AA Antiinflammatory preparations, non-steroids for topical use	E	p2yr
J01AA	3394	464	363117	30025	0.409663	0.0541834	0.276183	0.0552627	1.31809	1.18278	1.46887	4.019e-14	5.806e-07	-1	-1	D J01AA Tetracyclines [DG:DG01197]	E	p2yr
J07BB	3484	374	22138	4839	-0.503063	0.059567	-0.46731	0.0589937	0.626686	0.558255	0.703505	3.163e-17	2.428e-15	1	1	D J07BB Influenza vaccines	F	p2yr
A02BC	2372	1486	14288	12689	-0.221975	0.0373918	-0.182433	0.0385324	0.833241	0.772628	0.898608	2.943e-09	2.205e-06	1	1	D A02BC Proton pump inhibitors [DG:DG01646]	F	p2yr
G03CA	3615	243	24712	2265	-0.36021	0.0691184	-0.307994	0.0696253	0.734919	0.641169	0.842378	1.885e-07	9.74e-06	1	1	D G03CA Natural and semisynthetic estrogens, plain	F	p2yr
N03AX	3525	333	24025	2952	-0.315644	0.0702976	-0.267085	0.0729096	0.765608	0.663656	0.883222	7.145e-06	0.0002495	1	1	D N03AX Other antiepileptics	F	p2yr
A03FA	3806	52	26276	701	-0.665652	0.161244	-0.611505	0.163611	0.542534	0.393691	0.747649	3.665e-05	0.0001861	1	1	D A03FA Propulsives [DG:DG01763]	F	p2yr
J01MA	3775	83	26014	963	-0.527391	0.130588	-0.508149	0.132085	0.601608	0.464385	0.77938	5.39e-05	0.0001197	1	1	D J01MA Fluoroquinolones [DG:DG01549]	F	p2yr
C05AX	3753	105	25921	1056	-0.447728	0.111663	-0.406764	0.112531	0.665802	0.534016	0.83011	6.096e-05	0.0003012	1	1	D C05AX Other agents for treatment of hemorrhoids and anal fissures for topical use	F	p2yr
C07AB	3375	483	22219	4758	-0.250781	0.064075	-0.233568	0.0646204	0.791704	0.697518	0.898607	9.103e-05	0.0003015	1	1	D C07AB Beta blocking agents, selective	F	p2yr
N02AX	3699	159	25430	1547	-0.380996	0.0987436	-0.249576	0.101007	0.779131	0.639189	0.949711	0.0001143	0.01348	1	1	D N02AX Other opioids	F	p2yr
N06AA	3498	360	23773	3204	-0.231503	0.0635029	-0.147741	0.0653206	0.862654	0.758986	0.980483	0.0002673	0.02372	1	1	D N06AA Non-selective monoamine reuptake inhibitors [DG:DG01730]	F	p2yr
N06DX	3780	78	26760	217	1.25134	0.166329	0.925058	0.183569	2.52201	1.7599	3.61416	5.488e-14	4.699e-07	-1	-1	D N06DX Other anti-dementia drugs	F	p2yr
N06DA	3776	82	26621	356	0.81547	0.151153	0.498915	0.163412	1.64693	1.19557	2.26871	6.902e-08	0.002267	-1	-1	D N06DA Anticholinesterases	F	p2yr
N05CD	3796	62	26695	282	0.670373	0.160828	0.663016	0.165891	1.94064	1.40195	2.68631	3.078e-05	6.438e-05	-1	-1	D N05CD Benzodiazepine derivatives	F	p2yr
D01BA	3799	59	26730	247	0.560761	0.144881	0.585282	0.146036	1.7955	1.34857	2.39054	0.0001088	6.143e-05	-1	-1	D D01BA Antifungals for systemic use	F	p2yr
N05AX	3812	46	26804	173	0.679361	0.202297	0.186328	0.215528	1.20482	0.789689	1.83817	0.0007854	0.3873	-1	0	D N05AX Other antipsychotics	F	p2yr
M02AA	3318	540	23027	3950	0.182752	0.0560678	0.237373	0.0572215	1.26791	1.13339	1.4184	0.001117	3.358e-05	-1	-1	D M02AA Antiinflammatory preparations, non-steroids for topical use	F	p2yr
A06AB	3614	244	25495	1482	0.250852	0.087224	0.300986	0.0906888	1.35119	1.13115	1.61404	0.004031	0.0009048	-1	-1	D A06AB Contact laxatives	F	p2yr
J01CA	2998	860	20958	6019	0.101566	0.0446181	0.148879	0.045309	1.16053	1.06191	1.26831	0.02283	0.001018	-1	-1	D J01CA Penicillins with extended spectrum [DG:DG01780]	F	p2yr
D09AA	3814	44	26738	239	0.445377	0.202548	0.418654	0.204228	1.51992	1.01853	2.26812	0.02789	0.04038	-1	-1	D D09AA Medicated dressings with antiinfectives	F	p2yr
C10AA	821	497	15850	11127	-0.467026	0.0738902	-0.334109	0.0777779	0.715976	0.614739	0.833885	2.645e-10	1.747e-05	1	1	D C10AA HMG CoA reductase inhibitors [DG:DG01660]	G	p2yr
A02BC	789	529	14288	12689	-0.392392	0.0652227	-0.393162	0.067669	0.674919	0.591084	0.770645	1.808e-09	6.311e-09	1	1	D A02BC Proton pump inhibitors [DG:DG01646]	G	p2yr
J07BB	1161	157	22138	4839	-0.461479	0.0964526	-0.459772	0.0966008	0.631428	0.522509	0.763052	1.723e-06	1.95e-06	1	1	D J07BB Influenza vaccines	G	p2yr
C09AA	1074	244	21582	5395	-0.345995	0.0908644	-0.257284	0.0972211	0.773149	0.639006	0.935452	0.0001405	0.00814	1	1	D C09AA ACE inhibitors, plain [DG:DG01501]	G	p2yr
H03AA	1233	85	24385	2592	-0.446214	0.130116	-0.402165	0.13128	0.66887	0.517121	0.865151	0.0006059	0.00219	1	1	D H03AA Thyroid hormones	G	p2yr
G03CA	1256	62	24712	2265	-0.411647	0.135777	-0.364148	0.136457	0.694789	0.531735	0.907842	0.002433	0.007622	1	1	D G03CA Natural and semisynthetic estrogens, plain	G	p2yr
C09CA	1177	141	23739	3238	-0.326529	0.113221	-0.264994	0.118948	0.767211	0.607661	0.968652	0.00393	0.0259	1	1	D C09CA Angiotensin II receptor blockers, plain [DG:DG01495]	G	p2yr
S01EE	1294	24	26139	838	-0.736073	0.26034	-0.71104	0.261285	0.491133	0.294295	0.819624	0.004697	0.006506	1	1	D S01EE Prostaglandin analogues	G	p2yr
C07AB	1092	226	22219	4758	-0.274006	0.100166	-0.111954	0.104072	0.894086	0.729103	1.0964	0.006232	0.2821	1	0	D C07AB Beta blocking agents, selective	G	p2yr
C08CA	1034	284	21145	5832	-0.231561	0.0848057	-0.0878189	0.0878407	0.915927	0.771059	1.08801	0.006328	0.3174	1	0	D C08CA Dihydropyridine derivatives [DG:DG01928]	G	p2yr
A06AB	1157	161	25495	1482	0.74464	0.109097	0.517522	0.124603	1.67786	1.31429	2.14202	8.938e-12	3.286e-05	-1	-1	D A06AB Contact laxatives	G	p2yr
N06DX	1278	40	26760	217	1.36943	0.219339	0.842325	0.248643	2.32176	1.42614	3.77982	4.341e-10	0.0007058	-1	-1	D N06DX Other anti-dementia drugs	G	p2yr
N05CD	1280	38	26695	282	1.12976	0.198443	0.778093	0.218501	2.17732	1.41881	3.34132	1.26e-08	0.00037	-1	-1	D N05CD Benzodiazepine derivatives	G	p2yr
N06DA	1276	42	26621	356	1.00852	0.202482	0.536447	0.222034	1.70992	1.10655	2.64229	6.369e-07	0.0157	-1	-1	D N06DA Anticholinesterases	G	p2yr
A06AD	1045	273	22899	4078	0.361074	0.0823777	0.197234	0.0918475	1.21803	1.01736	1.45828	1.174e-05	0.03177	-1	-1	D A06AD Osmotically acting laxatives	G	p2yr
A06AA	1226	92	25935	1042	0.587707	0.135136	0.259572	0.149173	1.29638	0.967718	1.73665	1.372e-05	0.08186	-1	0	D A06AA Softeners, emollients	G	p2yr
N05AX	1290	28	26804	173	1.04329	0.2542	0.382716	0.279522	1.46626	0.847758	2.53601	4.068e-05	0.171	-1	0	D N05AX Other antipsychotics	G	p2yr
N02AA	1197	121	25359	1618	0.42751	0.116821	0.166178	0.12952	1.18078	0.916047	1.52203	0.0002531	0.1995	-1	0	D N02AA Natural opium alkaloids	G	p2yr
N05BA	1217	101	25514	1463	0.422534	0.118221	0.20191	0.127732	1.22374	0.952703	1.57188	0.000352	0.114	-1	0	D N05BA Benzodiazepine derivatives [DG:DG01914]	G	p2yr
A11DA	1279	39	26617	360	0.662879	0.217349	0.513015	0.223436	1.67032	1.07796	2.5882	0.002292	0.02168	-1	-1	D A11DA Vitamin B1, plain	G	p2yr
J07BB	160	10	22138	4839	-1.35686	0.359992	-1.36644	0.363035	0.255014	0.12518	0.519511	0.0001642	0.0001676	1	1	D J07BB Influenza vaccines	H	p2yr
R01AD	160	10	23534	3443	-0.942393	0.40261	-0.871318	0.40621	0.4184	0.188716	0.927627	0.01925	0.03196	1	1	D R01AD Corticosteroids	H	p2yr
G04CB	164	6	25897	1080	-1.18309	0.585712	-1.12253	0.602483	0.325456	0.0999158	1.06011	0.0434	0.06245	1	0	D G04CB Testosterone-5-alpha reductase inhibitors	H	p2yr
C10AA	86	84	15850	11127	-0.386775	0.194782	-0.385725	0.204012	0.679958	0.455846	1.01425	0.04708	0.05868	1	0	D C10AA HMG CoA reductase inhibitors [DG:DG01660]	H	p2yr
N05CD	145	25	26695	282	2.66421	0.275246	1.72284	0.378071	5.60038	2.66925	11.7502	4.007e-22	5.214e-06	-1	-1	D N05CD Benzodiazepine derivatives	H	p2yr
N02AA	130	40	25359	1618	1.6539	0.21906	0.659028	0.280052	1.93291	1.1164	3.3466	4.491e-14	0.01862	-1	-1	D N02AA Natural opium alkaloids	H	p2yr
A06AB	126	44	25495	1482	1.49826	0.21818	0.904564	0.260281	2.47085	1.48349	4.11536	6.693e-12	0.000511	-1	-1	D A06AB Contact laxatives	H	p2yr
N06DX	152	18	26760	217	2.0089	0.336014	1.29832	0.393693	3.66315	1.69328	7.92469	2.279e-09	0.0009757	-1	-1	D N06DX Other anti-dementia drugs	H	p2yr
A03BB	152	18	26146	831	1.48921	0.288058	0.149719	0.397492	1.16151	0.532919	2.53153	2.359e-07	0.7064	-1	0	D A03BB Belladonna alkaloids, semisynthetic, quaternary ammonium compounds	H	p2yr
N05BA	145	25	25514	1463	1.24032	0.256129	0.348187	0.305775	1.4165	0.777907	2.57931	1.289e-06	0.2548	-1	0	D N05BA Benzodiazepine derivatives [DG:DG01914]	H	p2yr
N02BE	78	92	19013	7964	0.778014	0.191574	0.231406	0.215489	1.26037	0.826162	1.92279	4.897e-05	0.2829	-1	0	D N02BE Anilides	H	p2yr
N06DA	154	16	26621	356	1.4003	0.346871	0.772286	0.398253	2.16471	0.991724	4.72507	5.43e-05	0.05249	-1	0	D N06DA Anticholinesterases	H	p2yr
A06AD	112	58	22899	4078	0.780717	0.196227	0.0774515	0.233774	1.08053	0.683344	1.70858	6.949e-05	0.7404	-1	0	D A06AD Osmotically acting laxatives	H	p2yr
J01CF	125	45	23605	3372	0.801017	0.208619	0.684264	0.218747	1.98231	1.29112	3.04353	0.0001235	0.001761	-1	-1	D J01CF Beta-lactamase resistant penicillins [DG:DG01779]	H	p2yr
C10AA	744	574	1617	923	-0.610507	0.0912542	-0.555072	0.0979294	0.574031	0.473752	0.695535	2.552e-11	1.551e-08	1	1	D C10AA HMG CoA reductase inhibitors [DG:DG01660]	A	p5yr
C09AA	1005	313	2051	489	-0.335908	0.106704	-0.25292	0.115624	0.77653	0.619024	0.974113	0.001656	0.02877	1	1	D C09AA ACE inhibitors, plain [DG:DG01501]	A	p5yr
A10BA	1143	175	2336	204	-0.427385	0.179837	-0.106164	0.191446	0.899277	0.617849	1.30889	0.01753	0.5792	1	0	D A10BA Biguanides [DG:DG01684]	A	p5yr
H03AA	1232	86	2350	190	-0.369785	0.156021	-0.403704	0.162729	0.667842	0.485416	0.918825	0.01783	0.01315	1	1	D H03AA Thyroid hormones	A	p5yr
S01EE	1287	31	2480	60	-0.628169	0.272663	-0.505237	0.283176	0.603363	0.346307	1.05122	0.02129	0.07447	1	0	D S01EE Prostaglandin analogues	A	p5yr
A03AA	1278	40	2440	100	-0.50172	0.219954	-0.575518	0.230671	0.562413	0.357804	0.884028	0.0226	0.01264	1	1	D A03AA Synthetic anticholinergics, esters with tertiary amino group	A	p5yr
A02BC	612	706	1267	1273	-0.16672	0.075021	-0.213811	0.0796058	0.807501	0.690813	0.943898	0.02632	0.007265	1	1	D A02BC Proton pump inhibitors [DG:DG01646]	A	p5yr
C09CA	1153	165	2303	237	-0.279049	0.137816	-0.194497	0.148458	0.823249	0.615352	1.10138	0.04296	0.1902	1	0	D C09CA Angiotensin II receptor blockers, plain [DG:DG01495]	A	p5yr
A06AA	1196	122	2470	70	1.00054	0.186852	0.742806	0.207328	2.10182	1.39979	3.15595	9.072e-08	0.0003442	-1	-1	D A06AA Softeners, emollients	A	p5yr
A06AD	955	363	2210	330	0.532692	0.101784	0.380907	0.11417	1.46361	1.17007	1.83079	1.752e-07	0.0008571	-1	-1	D A06AD Osmotically acting laxatives	A	p5yr
A06AB	1112	206	2402	138	0.703491	0.141922	0.256209	0.166974	1.29202	0.931315	1.79244	7.473e-07	0.125	-1	0	D A06AB Contact laxatives	A	p5yr
H02AB	964	354	2120	420	0.4024	0.0990067	0.436232	0.105079	1.54687	1.25887	1.90075	4.913e-05	3.376e-05	-1	-1	D H02AB Glucocorticoids	A	p5yr
A11DA	1274	44	2528	12	1.66179	0.409193	1.44214	0.418588	4.22974	1.86165	9.61014	4.981e-05	0.0005767	-1	-1	D A11DA Vitamin B1, plain	A	p5yr
N02AA	1156	162	2410	130	0.55779	0.147359	0.131129	0.16817	1.14011	0.819891	1.58541	0.0001559	0.4356	-1	0	D N02AA Natural opium alkaloids	A	p5yr
A03FA	1253	65	2484	56	0.750214	0.210686	0.644485	0.225766	1.90501	1.22367	2.96571	0.0003742	0.004332	-1	-1	D A03FA Propulsives [DG:DG01763]	A	p5yr
N05CD	1273	45	2511	29	0.951213	0.278324	0.544655	0.308624	1.72401	0.94136	3.15737	0.0006382	0.07768	-1	0	D N05CD Benzodiazepine derivatives	A	p5yr
J01FA	1054	264	2204	336	0.30975	0.102354	0.232963	0.10845	1.26233	1.02055	1.56141	0.002492	0.03177	-1	-1	D J01FA Macrolides [DG:DG01551]	A	p5yr
C03CA	1119	199	2392	148	0.440052	0.151972	0.260825	0.163371	1.298	0.942257	1.78805	0.003806	0.1105	-1	0	D C03CA Sulfonamides, plain	A	p5yr
G04CB	163	7	3580	108	-1.23348	0.597259	-1.23324	0.618984	0.291348	0.0865696	0.980527	0.03897	0.0464	1	1	D G04CB Testosterone-5-alpha reductase inhibitors	B	p5yr
N05CD	143	27	3641	47	2.33358	0.335468	1.94285	0.4535	6.97861	2.86832	16.979	4.093e-12	1.88e-05	-1	-1	D N05CD Benzodiazepine derivatives	B	p5yr
N02AA	124	46	3442	246	1.27131	0.241329	0.309557	0.306454	1.36282	0.747312	2.48528	1.456e-07	0.3125	-1	0	D N02AA Natural opium alkaloids	B	p5yr
A06AB	118	52	3396	292	1.01287	0.231538	0.559974	0.277224	1.75063	1.01659	3.01468	1.249e-05	0.04346	-1	-1	D A06AB Contact laxatives	B	p5yr
A06AD	93	77	3072	616	0.861394	0.205235	0.370769	0.242475	1.44885	0.900663	2.33068	2.765e-05	0.1263	-1	0	D A06AD Osmotically acting laxatives	B	p5yr
N05AX	156	14	3640	48	1.56313	0.399753	0.586069	0.479084	1.79691	0.702425	4.59677	9.38e-05	0.2213	-1	0	D N05AX Other antipsychotics	B	p5yr
A11DA	157	13	3645	43	1.49533	0.431852	1.03606	0.464495	2.8181	1.13358	7.00585	0.0005409	0.02577	-1	-1	D A11DA Vitamin B1, plain	B	p5yr
A11CC	133	37	3323	365	0.833641	0.258041	0.495941	0.279164	1.64204	0.949914	2.83847	0.001246	0.07573	-1	0	D A11CC Vitamin D and analogues	B	p5yr
N02BE	54	116	2266	1422	0.662586	0.209558	0.174539	0.232946	1.1907	0.754145	1.87996	0.00158	0.4537	-1	0	D N02BE Anilides	B	p5yr
N06AX	139	31	3374	314	0.798287	0.265624	0.239968	0.302867	1.27121	0.701995	2.30197	0.00267	0.4282	-1	0	D N06AX Other antidepressants	B	p5yr
A03BB	150	20	3516	172	0.914211	0.312803	-0.531062	0.463068	0.58798	0.237178	1.45765	0.003491	0.2515	-1	0	D A03BB Belladonna alkaloids, semisynthetic, quaternary ammonium compounds	B	p5yr
C10AA	744	574	237935	155207	-0.560475	0.0735486	-0.525926	0.0751415	0.591008	0.510073	0.684784	2.533e-14	2.579e-12	1	1	D C10AA HMG CoA reductase inhibitors [DG:DG01660]	C	p5yr
C09AA	1005	313	316247	76895	-0.352677	0.0834334	-0.307819	0.0883436	0.735048	0.618183	0.874005	2.368e-05	0.0004934	1	1	D C09AA ACE inhibitors, plain [DG:DG01501]	C	p5yr
H03AA	1232	86	358061	35081	-0.496625	0.127662	-0.504761	0.12793	0.60365	0.469775	0.775675	0.0001002	7.961e-05	1	1	D H03AA Thyroid hormones	C	p5yr
A10BA	1143	175	365792	27350	-0.392638	0.13718	-0.208869	0.141117	0.811502	0.615418	1.07006	0.004207	0.1388	1	0	D A10BA Biguanides [DG:DG01684]	C	p5yr
C09CA	1153	165	353839	39303	-0.277539	0.105377	-0.307905	0.109599	0.734985	0.592908	0.911109	0.008444	0.004964	1	1	D C09CA Angiotensin II receptor blockers, plain [DG:DG01495]	C	p5yr
S01EE	1287	31	381566	11576	-0.551533	0.22187	-0.442262	0.235294	0.642582	0.405177	1.01909	0.01293	0.06016	1	0	D S01EE Prostaglandin analogues	C	p5yr
S01ED	1303	15	386366	6776	-0.705415	0.315344	-0.483697	0.333719	0.6165	0.320531	1.18576	0.02529	0.1472	1	0	D S01ED Beta blocking agents	C	p5yr
C08CA	967	351	310104	83038	-0.175898	0.0790492	-0.0747807	0.0812969	0.927947	0.791267	1.08824	0.02607	0.3577	1	0	D C08CA Dihydropyridine derivatives [DG:DG01928]	C	p5yr
A06AB	1112	206	378299	14843	1.10445	0.0942694	0.624227	0.106783	1.8668	1.51427	2.3014	1.07e-31	5.048e-09	-1	-1	D A06AB Contact laxatives	C	p5yr
N06DX	1275	43	391994	1148	2.08901	0.211467	1.12355	0.244232	3.07574	1.90572	4.96411	5.182e-23	4.22e-06	-1	-1	D N06DX Other anti-dementia drugs	C	p5yr
A06AD	955	363	345775	47367	0.711038	0.0732513	0.341126	0.08263	1.40653	1.19623	1.6538	2.836e-22	3.654e-05	-1	-1	D A06AD Osmotically acting laxatives	C	p5yr
A06AA	1196	122	383186	9956	1.04457	0.113473	0.493647	0.123704	1.63828	1.28555	2.08779	3.418e-20	6.593e-05	-1	-1	D A06AA Softeners, emollients	C	p5yr
N05CD	1273	45	390217	2925	1.43875	0.167833	0.900341	0.17823	2.46044	1.73501	3.48918	1.016e-17	4.384e-07	-1	-1	D N05CD Benzodiazepine derivatives	C	p5yr
N06DA	1264	54	390590	2552	1.56688	0.184715	0.868451	0.210771	2.38322	1.57672	3.60224	2.207e-17	3.784e-05	-1	-1	D N06DA Anticholinesterases	C	p5yr
N02AA	1156	162	377818	15324	0.840464	0.103068	0.369254	0.110942	1.44665	1.16394	1.79804	3.518e-16	0.0008737	-1	-1	D N02AA Natural opium alkaloids	C	p5yr
N05AX	1280	38	391830	1312	1.53567	0.204758	0.891886	0.219952	2.43973	1.58532	3.75461	6.399e-14	5.016e-05	-1	-1	D N05AX Other antipsychotics	C	p5yr
J01CA	722	596	273395	119747	0.395044	0.0613	0.335306	0.0622435	1.39837	1.23777	1.57981	1.162e-10	7.168e-08	-1	-1	D J01CA Penicillins with extended spectrum [DG:DG01780]	C	p5yr
N05BA	1155	163	367816	25326	0.582165	0.0929341	0.265219	0.0979311	1.30372	1.07603	1.57958	3.749e-10	0.006765	-1	-1	D N05BA Benzodiazepine derivatives [DG:DG01914]	C	p5yr
C10AA	69	101	237935	155207	-0.476403	0.201001	-0.505931	0.204345	0.602944	0.40396	0.899945	0.01778	0.01329	1	1	D C10AA HMG CoA reductase inhibitors [DG:DG01660]	D	p5yr
J07BB	147	23	321673	71469	-0.548673	0.247481	-0.693066	0.253338	0.500041	0.304343	0.821575	0.02662	0.006224	1	1	D J07BB Influenza vaccines	D	p5yr
G04CB	163	7	381421	11721	-1.11894	0.563047	-1.32547	0.575166	0.265679	0.0860544	0.820238	0.04689	0.0212	1	1	D G04CB Testosterone-5-alpha reductase inhibitors	D	p5yr
N05CD	143	27	390217	2925	2.89449	0.245785	1.87569	0.29307	6.52533	3.674	11.5895	5.223e-32	1.554e-10	-1	-1	D N05CD Benzodiazepine derivatives	D	p5yr
N02AA	124	46	377818	15324	1.81291	0.212335	0.730953	0.247607	2.07706	1.27845	3.37453	1.371e-17	0.003157	-1	-1	D N02AA Natural opium alkaloids	D	p5yr
A06AB	118	52	378299	14843	1.76224	0.207575	0.993567	0.231226	2.70085	1.71664	4.24934	2.079e-17	1.732e-05	-1	-1	D A06AB Contact laxatives	D	p5yr
N05AX	156	14	391830	1312	2.81363	0.349586	1.4706	0.402559	4.35185	1.97704	9.5793	8.407e-16	0.0002591	-1	-1	D N05AX Other antipsychotics	D	p5yr
N06DX	152	18	391994	1148	2.4619	0.35453	0.984564	0.4212	2.67665	1.17237	6.11108	3.814e-12	0.01941	-1	-1	D N06DX Other anti-dementia drugs	D	p5yr
A06AD	93	77	345775	47367	1.29405	0.188411	0.499145	0.217405	1.64731	1.07577	2.5225	6.509e-12	0.02168	-1	-1	D A06AD Osmotically acting laxatives	D	p5yr
A11DA	157	13	390722	2420	2.11658	0.350244	1.59038	0.360285	4.90562	2.42113	9.93963	1.513e-09	1.014e-05	-1	-1	D A11DA Vitamin B1, plain	D	p5yr
N06DA	149	21	390590	2552	1.93475	0.326826	0.873756	0.374885	2.39589	1.14911	4.99541	3.226e-09	0.01977	-1	-1	D N06DA Anticholinesterases	D	p5yr
N02BE	54	116	281164	111978	1.13752	0.202479	0.585855	0.220735	1.79653	1.16558	2.76901	1.933e-08	0.007952	-1	-1	D N02BE Anilides	D	p5yr
N06AX	139	31	373122	20020	1.2776	0.243683	0.264664	0.2673	1.30299	0.77164	2.20024	1.582e-07	0.3221	-1	0	D N06AX Other antidepressants	D	p5yr
J07BB	3320	538	321673	71469	-0.179992	0.0487667	-0.208459	0.0496834	0.811834	0.736506	0.894866	0.0002235	2.72e-05	1	1	D J07BB Influenza vaccines	E	p5yr
H03AA	3582	276	358061	35081	-0.234233	0.0653727	-0.245181	0.065461	0.782563	0.688333	0.889692	0.0003397	0.0001801	1	1	D H03AA Thyroid hormones	E	p5yr
J07AL	3793	65	382801	10341	-0.35866	0.123947	-0.249308	0.126105	0.77934	0.608675	0.997857	0.003808	0.04804	1	1	D J07AL Pneumococcal vaccines	E	p5yr
C09AA	3056	802	316247	76895	-0.135621	0.0481385	-0.121423	0.0487516	0.88566	0.804951	0.974461	0.004843	0.01275	1	1	D C09AA ACE inhibitors, plain [DG:DG01501]	E	p5yr
J07AP	3743	115	378194	14948	-0.207825	0.0900303	-0.128816	0.0944674	0.879136	0.730542	1.05795	0.02098	0.1727	1	0	D J07AP Typhoid vaccines	E	p5yr
C10AB	3837	21	390666	2476	-0.633914	0.287013	-0.649833	0.287554	0.522133	0.297176	0.917378	0.0272	0.02383	1	1	D C10AB Fibrates	E	p5yr
C10AA	2361	1497	237935	155207	-0.0852664	0.0408115	-0.116023	0.0415211	0.890455	0.82086	0.965951	0.03668	0.005201	1	1	D C10AA HMG CoA reductase inhibitors [DG:DG01660]	E	p5yr
S01EC	3825	33	387931	5211	-0.389253	0.191552	-0.378308	0.1919	0.685019	0.470281	0.997811	0.04214	0.04868	1	1	D S01EC Carbonic anhydrase inhibitors	E	p5yr
J07CA	3585	273	359745	33397	-0.116978	0.0592778						0.04845		1		D J07CA Bacterial and viral vaccines, combined	E	p5yr
N06DX	3774	84	391994	1148	2.05092	0.149202	1.21127	0.174558	3.35776	2.38487	4.72752	5.511e-43	3.952e-12	-1	-1	D N06DX Other anti-dementia drugs	E	p5yr
N06DA	3749	109	390590	2552	1.58106	0.125032	1.00152	0.14543	2.72241	2.04721	3.6203	1.209e-36	5.723e-12	-1	-1	D N06DA Anticholinesterases	E	p5yr
N02BE	2320	1538	281164	111978	0.413565	0.0364856	0.261555	0.055469	1.29895	1.16514	1.44813	8.895e-30	2.414e-06	-1	-1	D N02BE Anilides	E	p5yr
A06AB	3514	344	378299	14843	0.737277	0.0676608	0.480262	0.0724878	1.6165	1.4024	1.86328	1.206e-27	3.467e-11	-1	-1	D A06AB Contact laxatives	E	p5yr
J01CA	2323	1535	273395	119747	0.356332	0.0339368	0.299125	0.0345006	1.34868	1.2605	1.44303	8.717e-26	4.332e-18	-1	-1	D J01CA Penicillins with extended spectrum [DG:DG01780]	E	p5yr
N02AJ	2883	975	320833	72309	0.320647	0.0395023	0.0142363	0.0578578	1.01434	0.905595	1.13614	4.785e-16	0.8056	-1	0	D N02AJ Opioids in combination with non-opioid analgesics	E	p5yr
M02AA	2845	1013	313329	79813	0.326312	0.0405442	0.187144	0.042289	1.2058	1.10989	1.31	8.418e-16	9.631e-06	-1	-1	D M02AA Antiinflammatory preparations, non-steroids for topical use	E	p5yr
A06AD	3165	693	345775	47367	0.367368	0.047578	0.103737	0.0517329	1.10931	1.00234	1.22769	1.153e-14	0.04494	-1	-1	D A06AD Osmotically acting laxatives	E	p5yr
N05CD	3784	74	390217	2925	0.962554	0.129447	0.716554	0.132552	2.04737	1.57894	2.65475	1.041e-13	6.454e-08	-1	-1	D N05CD Benzodiazepine derivatives	E	p5yr
N05AX	3796	62	391830	1312	1.12522	0.154624	0.61899	0.164307	1.85705	1.34575	2.56261	3.416e-13	0.0001651	-1	-1	D N05AX Other antipsychotics	E	p5yr
J07BB	3320	538	20551	6426	-0.424227	0.0512668	-0.386914	0.0523332	0.67915	0.61294	0.752512	1.337e-16	1.469e-13	1	1	D J07BB Influenza vaccines	F	p5yr
G03CA	3494	364	23731	3246	-0.314955	0.0596114	-0.269788	0.060177	0.763541	0.67859	0.859127	1.276e-07	7.378e-06	1	1	D G03CA Natural and semisynthetic estrogens, plain	F	p5yr
J01MA	3676	182	25105	1872	-0.37796	0.0870837	-0.323655	0.0885118	0.723499	0.608266	0.860563	1.428e-05	0.000256	1	1	D J01MA Fluoroquinolones [DG:DG01549]	F	p5yr
J01CR	3516	342	23760	3217	-0.280425	0.0661886	-0.241068	0.0677046	0.785788	0.688134	0.897301	2.274e-05	0.0003706	1	1	D J01CR Combinations of penicillins, incl. beta-lactamase inhibitors	F	p5yr
N03AX	3354	504	22739	4238	-0.235674	0.0575124	-0.206369	0.0602687	0.813532	0.72289	0.915541	4.182e-05	0.0006175	1	1	D N03AX Other antiepileptics	F	p5yr
A03FA	3737	121	25628	1349	-0.418772	0.104629	-0.37949	0.106672	0.68421	0.55512	0.84332	6.283e-05	0.0003749	1	1	D A03FA Propulsives [DG:DG01763]	F	p5yr
C05AX	3603	255	24782	2195	-0.276513	0.0720748	-0.234823	0.0729673	0.790711	0.685339	0.912284	0.0001251	0.001291	1	1	D C05AX Other agents for treatment of hemorrhoids and anal fissures for topical use	F	p5yr
N02AX	3530	328	24025	2952	-0.264798	0.0691882	-0.198176	0.0718379	0.820225	0.712495	0.944244	0.0001299	0.005807	1	1	D N02AX Other opioids	F	p5yr
A02BC	1879	1979	11283	15694	-0.135947	0.0355675	-0.109025	0.0368246	0.896708	0.834267	0.963824	0.0001325	0.003072	1	1	D A02BC Proton pump inhibitors [DG:DG01646]	F	p5yr
J07AL	3793	65	26224	753	-0.491997	0.129587	-0.278568	0.132101	0.756867	0.584212	0.980547	0.0001469	0.03497	1	1	D J07AL Pneumococcal vaccines	F	p5yr
N06DX	3774	84	26742	235	1.28762	0.159658	0.793949	0.181974	2.21211	1.54848	3.16017	7.593e-16	1.287e-05	-1	-1	D N06DX Other anti-dementia drugs	F	p5yr
N06DA	3749	109	26567	410	1.03532	0.135347	0.683686	0.153204	1.98117	1.46726	2.67506	2.078e-14	8.127e-06	-1	-1	D N06DA Anticholinesterases	F	p5yr
N05AX	3796	62	26742	235	0.686571	0.176415	0.261312	0.187185	1.29863	0.899804	1.87424	9.971e-05	0.1627	-1	0	D N05AX Other antipsychotics	F	p5yr
N05CD	3784	74	26562	415	0.422827	0.142098	0.415845	0.145718	1.51565	1.13909	2.01669	0.002926	0.004323	-1	-1	D N05CD Benzodiazepine derivatives	F	p5yr
M02AA	2845	1013	19359	7618	0.129278	0.0437261	0.172476	0.0451054	1.18824	1.0877	1.29808	0.003113	0.0001316	-1	-1	D M02AA Antiinflammatory preparations, non-steroids for topical use	F	p5yr
D01BA	3734	124	26268	709	0.289993	0.0989108	0.300436	0.0995647	1.35045	1.11103	1.64146	0.003372	0.002551	-1	-1	D D01BA Antifungals for systemic use	F	p5yr
J01CA	2323	1535	16107	10870	0.102991	0.0368076	0.156728	0.0378102	1.16968	1.08613	1.25966	0.005144	3.405e-05	-1	-1	D J01CA Penicillins with extended spectrum [DG:DG01780]	F	p5yr
A06AB	3514	344	24708	2269	0.19909	0.0724176	0.233687	0.0751528	1.26325	1.09023	1.46373	0.005978	0.001876	-1	-1	D A06AB Contact laxatives	F	p5yr
D06BA	3835	23	26880	97	0.631359	0.26793	0.620492	0.27069	1.85984	1.0941	3.16153	0.01846	0.0219	-1	-1	D D06BA Sulfonamides	F	p5yr
N02BG	3785	73	26500	477	0.289396	0.141436	0.365727	0.144295	1.44156	1.08644	1.91277	0.04075	0.01126	-1	-1	D N02BG Other analgesics and antipyretics	F	p5yr
C10AA	744	574	14700	12277	-0.376959	0.0723457	-0.293151	0.0745725	0.745909	0.644476	0.863306	1.896e-07	8.476e-05	1	1	D C10AA HMG CoA reductase inhibitors [DG:DG01660]	G	p5yr
J07BB	1090	228	20551	6426	-0.361543	0.0825523	-0.372617	0.0833649	0.688929	0.585075	0.811219	1.193e-05	7.863e-06	1	1	D J07BB Influenza vaccines	G	p5yr
A02BC	612	706	11283	15694	-0.254098	0.0620616	-0.231867	0.0641499	0.793052	0.69935	0.899308	4.246e-05	0.0003015	1	1	D A02BC Proton pump inhibitors [DG:DG01646]	G	p5yr
G03CA	1226	92	23731	3246	-0.44203	0.117485	-0.393743	0.118226	0.674527	0.535009	0.850428	0.0001686	0.0008682	1	1	D G03CA Natural and semisynthetic estrogens, plain	G	p5yr
C09AA	1005	313	20408	6569	-0.304547	0.0842192	-0.272517	0.087742	0.761461	0.641148	0.90435	0.0002996	0.001899	1	1	D C09AA ACE inhibitors, plain [DG:DG01501]	G	p5yr
H03AA	1232	86	24351	2626	-0.450029	0.129637	-0.433031	0.130763	0.648541	0.501911	0.838006	0.0005184	0.0009289	1	1	D H03AA Thyroid hormones	G	p5yr
A03AA	1278	40	25655	1322	-0.608422	0.188877	-0.600616	0.190703	0.548474	0.377418	0.797057	0.001278	0.001637	1	1	D A03AA Synthetic anticholinergics, esters with tertiary amino group	G	p5yr
C09CA	1153	165	23302	3675	-0.316171	0.107556	-0.280438	0.110889	0.755453	0.607875	0.938859	0.003289	0.01144	1	1	D C09CA Angiotensin II receptor blockers, plain [DG:DG01495]	G	p5yr
S01EE	1287	31	25941	1036	-0.641052	0.225353	-0.460487	0.238467	0.630977	0.395386	1.00694	0.004449	0.05349	1	0	D S01EE Prostaglandin analogues	G	p5yr
S01ED	1303	15	26358	619	-0.883224	0.318897	-0.653044	0.336644	0.520459	0.269043	1.00682	0.005616	0.05241	1	0	D S01ED Beta blocking agents	G	p5yr
N06DX	1275	43	26742	235	1.38189	0.213716	0.804213	0.244876	2.23494	1.38299	3.61171	1.023e-10	0.001024	-1	-1	D N06DX Other anti-dementia drugs	G	p5yr
A06AB	1112	206	24708	2269	0.594465	0.0966468	0.445851	0.10968	1.56182	1.2597	1.9364	7.807e-10	4.816e-05	-1	-1	D A06AB Contact laxatives	G	p5yr
N06DA	1264	54	26567	410	1.09287	0.1906	0.577118	0.215838	1.7809	1.16657	2.71874	9.919e-09	0.007503	-1	-1	D N06DA Anticholinesterases	G	p5yr
N05CD	1273	45	26562	415	0.908996	0.178206	0.692402	0.190352	1.99851	1.37617	2.90229	3.404e-07	0.0002758	-1	-1	D N05CD Benzodiazepine derivatives	G	p5yr
N05AX	1280	38	26742	235	1.06709	0.22211	0.598953	0.238788	1.82021	1.13987	2.90661	1.561e-06	0.01214	-1	-1	D N05AX Other antipsychotics	G	p5yr
A06AA	1196	122	25403	1574	0.479067	0.117043	0.261597	0.127615	1.299	1.01153	1.66817	4.269e-05	0.04038	-1	-1	D A06AA Softeners, emollients	G	p5yr
B03BB	1154	164	24869	2108	0.35172	0.108561	0.277816	0.112045	1.32024	1.05993	1.64449	0.001197	0.01316	-1	-1	D B03BB Folic acid and derivatives	G	p5yr
A06AD	955	363	20918	6059	0.20981	0.0744506	0.071871	0.0835277	1.07452	0.912244	1.26565	0.004834	0.3896	-1	0	D A06AD Osmotically acting laxatives	G	p5yr
A11DA	1274	44	26524	453	0.556315	0.201776	0.364725	0.206643	1.44012	0.960496	2.15924	0.005835	0.07757	-1	0	D A11DA Vitamin B1, plain	G	p5yr
N02AA	1156	162	24563	2414	0.270044	0.104852	0.0958813	0.113162	1.10063	0.881684	1.37394	0.01001	0.3968	-1	0	D N02AA Natural opium alkaloids	G	p5yr
J07BB	147	23	20551	6426	-0.79039	0.250191	-0.763992	0.259858	0.465803	0.279898	0.775183	0.001584	0.003285	1	1	D J07BB Influenza vaccines	H	p5yr
G04CB	163	7	25705	1272	-1.32819	0.568224	-1.20538	0.574809	0.299578	0.097098	0.924294	0.01942	0.036	1	1	D G04CB Testosterone-5-alpha reductase inhibitors	H	p5yr
D05AX	167	3	25621	1356	-1.95196	0.917821	-1.72346	0.924846	0.178447	0.0291235	1.09339	0.03345	0.0624	1	0	D D05AX Other antipsoriatics for topical use	H	p5yr
N05CD	143	27	26562	415	2.41605	0.260279	1.77603	0.310904	5.90636	3.21119	10.8636	1.775e-20	1.125e-08	-1	-1	D N05CD Benzodiazepine derivatives	H	p5yr
N02AA	124	46	24563	2414	1.30797	0.21379	0.504506	0.254034	1.65617	1.00661	2.72489	9.605e-10	0.04705	-1	-1	D N02AA Natural opium alkaloids	H	p5yr
A06AB	118	52	24708	2269	1.24881	0.20883	0.72148	0.237383	2.05748	1.29201	3.27646	2.259e-09	0.002374	-1	-1	D A06AB Contact laxatives	H	p5yr
N05AX	156	14	26742	235	2.15444	0.361725	1.08278	0.434674	2.95288	1.2596	6.92242	2.617e-09	0.01274	-1	-1	D N05AX Other antipsychotics	H	p5yr
N06DX	152	18	26742	235	1.91524	0.339382	0.968693	0.418984	2.6345	1.15889	5.98899	1.684e-08	0.02078	-1	-1	D N06DX Other anti-dementia drugs	H	p5yr
N06DA	149	21	26567	410	1.52884	0.328934	0.864159	0.386338	2.37301	1.11284	5.06018	3.37e-06	0.02531	-1	-1	D N06DA Anticholinesterases	H	p5yr
A11DA	157	13	26524	453	1.63903	0.357082	1.13228	0.386599	3.10272	1.4543	6.61958	4.451e-06	0.003405	-1	-1	D A11DA Vitamin B1, plain	H	p5yr
A06AD	93	77	20918	6059	0.804962	0.187408	0.235945	0.215612	1.2661	0.82972	1.932	1.751e-05	0.2738	-1	0	D A06AD Osmotically acting laxatives	H	p5yr
N02BE	54	116	15452	11525	0.769724	0.201556	0.309719	0.218541	1.36304	0.888135	2.09189	0.0001343	0.1564	-1	0	D N02BE Anilides	H	p5yr
N06AX	139	31	24590	2387	0.928435	0.244686	0.0441321	0.278222	1.04512	0.605805	1.80302	0.0001483	0.874	-1	0	D N06AX Other antidepressants	H	p5yr
A06AA	1166	152	2437	103	0.912918	0.160225	0.737489	0.17667	2.09068	1.47862	2.95609	1.305e-08	3.055e-05	-1	-1	D A06AA Softeners, emollients	A	p10y
A06AB	1072	246	2340	200	0.525466	0.125638	0.173779	0.145686	1.18979	0.894177	1.58314	2.949e-05	0.233	-1	0	D A06AB Contact laxatives	A	p10y
N05CD	1248	70	2481	59	0.843607	0.203876	0.685167	0.221093	1.9841	1.2862	3.06068	3.581e-05	0.001956	-1	-1	D N05CD Benzodiazepine derivatives	A	p10y
A06AD	868	450	2052	488	0.346623	0.0916673	0.232499	0.103184	1.26175	1.03066	1.54466	0.0001584	0.0243	-1	-1	D A06AD Osmotically acting laxatives	A	p10y
A11DA	1273	45	2525	15	1.41426	0.375289	1.23008	0.386333	3.42149	1.60422	7.29738	0.0001667	0.001464	-1	-1	D A11DA Vitamin B1, plain	A	p10y
N02AA	1118	200	2355	185	0.479875	0.130107	0.278515	0.145987	1.32117	0.992325	1.75898	0.0002289	0.05649	-1	0	D N02AA Natural opium alkaloids	A	p10y
C03CA	1084	234	2359	181	0.417339	0.140245	0.339248	0.151392	1.40389	1.04334	1.88904	0.002941	0.02509	-1	-1	D C03CA Sulfonamides, plain	A	p10y
H02AB	879	439	1947	593	0.266052	0.0904539	0.410154	0.0975636	1.50705	1.24467	1.82474	0.003288	2.683e-05	-1	-1	D H02AB Glucocorticoids	A	p10y
A03FA	1183	135	2373	167	0.37267	0.137295	0.259739	0.149291	1.29659	0.967579	1.73748	0.00667	0.08197	-1	0	D A03FA Propulsives [DG:DG01763]	A	p10y
M03BX	1293	25	2520	20	0.866592	0.32034	0.613698	0.338613	1.84725	0.951056	3.58794	0.006856	0.07	-1	0	D M03BX Other centrally acting agents	A	p10y
N05CD	138	32	3591	97	2.01024	0.291205	1.45499	0.328885	4.28445	2.24832	8.16452	5.926e-12	9.958e-06	-1	-1	D N05CD Benzodiazepine derivatives	B	p10y
N02AA	120	50	3353	335	1.10507	0.230977	0.377334	0.275437	1.45839	0.84986	2.50265	1.78e-06	0.1708	-1	0	D N02AA Natural opium alkaloids	B	p10y
N05AX	155	15	3638	50	1.58797	0.392895	0.754209	0.47593	2.12593	0.836196	5.40493	5.41e-05	0.1131	-1	0	D N05AX Other antipsychotics	B	p10y
A06AB	113	57	3299	389	0.841047	0.224064	0.350302	0.259455	1.4195	0.853525	2.36076	0.0001769	0.177	-1	0	D A06AB Contact laxatives	B	p10y
A06AD	83	87	2837	851	0.709117	0.201701	0.270853	0.231169	1.31108	0.833291	2.06283	0.0004437	0.2414	-1	0	D A06AD Osmotically acting laxatives	B	p10y
A11CC	128	42	3225	463	0.828113	0.244692	0.554571	0.264447	1.74119	1.03676	2.92426	0.0007208	0.03605	-1	-1	D A11CC Vitamin D and analogues	B	p10y
A11DA	157	13	3641	47	1.38968	0.423151	1.01952	0.454311	2.77185	1.13746	6.75465	0.001032	0.02488	-1	-1	D A11DA Vitamin B1, plain	B	p10y
N06AX	135	35	3297	391	0.803657	0.253179	0.220139	0.285465	1.24625	0.712099	2.18107	0.001514	0.4407	-1	0	D N06AX Other antidepressants	B	p10y
M05BA	140	30	3444	244	0.777909	0.278684	0.515397	0.299919	1.6743	0.929955	3.01444	0.005275	0.08579	-1	0	D M05BA Bisphosphonates [DG:DG01600]	B	p10y
N06DX	152	18	3621	67	1.02571	0.369125	0.243532	0.426384	1.27575	0.552982	2.94319	0.005483	0.5679	-1	0	D N06DX Other anti-dementia drugs	B	p10y
J07BB	1034	284	303160	89982	-0.169588	0.0750606	-0.172668	0.075533	0.841417	0.725634	0.975676	0.02386	0.02226	1	1	D J07BB Influenza vaccines	C	p10y
J07CA	1145	173	325108	68034	-0.185938	0.0839763	-0.149206	0.0842209	0.861391	0.730317	1.01599	0.02682	0.07646	1	0	D J07CA Bacterial and viral vaccines, combined	C	p10y
A06AB	1072	246	370213	22929	0.866312	0.0874979	0.45707	0.0988859	1.57944	1.30116	1.91723	4.149e-23	3.798e-06	-1	-1	D A06AB Contact laxatives	C	p10y
N06DX	1275	43	391985	1157	2.08162	0.211893	1.26284	0.240242	3.53545	2.20775	5.66161	8.937e-23	1.469e-07	-1	-1	D N06DX Other anti-dementia drugs	C	p10y
A06AA	1166	152	378493	14649	0.911201	0.101854	0.516102	0.110424	1.67548	1.34942	2.08034	3.697e-19	2.958e-06	-1	-1	D A06AA Softeners, emollients	C	p10y
N06DA	1263	55	390511	2631	1.56224	0.18433	0.782094	0.211345	2.18604	1.44464	3.30793	2.354e-17	0.0002152	-1	-1	D N06DA Anticholinesterases	C	p10y
A06AD	868	450	324553	68589	0.568444	0.0682985	0.290373	0.0767443	1.33693	1.15022	1.55393	8.608e-17	0.0001546	-1	-1	D A06AD Osmotically acting laxatives	C	p10y
N05CD	1248	70	385785	7357	1.01392	0.133368	0.739119	0.138434	2.09409	1.59647	2.74682	2.914e-14	9.344e-08	-1	-1	D N05CD Benzodiazepine derivatives	C	p10y
N02AA	1118	200	370811	22331	0.701409	0.0939956	0.357619	0.0998852	1.42992	1.17568	1.73914	8.53e-14	0.0003432	-1	-1	D N02AA Natural opium alkaloids	C	p10y
N05AX	1279	39	391505	1637	1.33121	0.202681	0.823911	0.211468	2.2794	1.50597	3.45003	5.105e-11	9.775e-05	-1	-1	D N05AX Other antipsychotics	C	p10y
N04BA	1288	30	390352	2790	1.07595	0.204624	0.588025	0.211744	1.80043	1.18888	2.72655	1.456e-07	0.005486	-1	-1	D N04BA Dopa and dopa derivatives	C	p10y
B03BB	1138	180	372595	20547	0.521575	0.100414	0.378231	0.1017	1.4597	1.1959	1.78168	2.056e-07	0.0002	-1	-1	D B03BB Folic acid and derivatives	C	p10y
J07BB	137	33	303160	89982	-0.476154	0.216539	-0.500667	0.220126	0.606127	0.393724	0.933115	0.02788	0.02294	1	1	D J07BB Influenza vaccines	D	p10y
N05CD	138	32	385785	7357	2.39601	0.226754	1.65333	0.259308	5.22435	3.14273	8.68473	4.293e-26	1.821e-10	-1	-1	D N05CD Benzodiazepine derivatives	D	p10y
N05AX	155	15	391505	1637	2.71318	0.342891	1.40888	0.388647	4.09137	1.91008	8.76368	2.526e-15	0.0002889	-1	-1	D N05AX Other antipsychotics	D	p10y
N02AA	120	50	370811	22331	1.53148	0.206803	0.751659	0.232941	2.12051	1.34326	3.34751	1.309e-13	0.001252	-1	-1	D N02AA Natural opium alkaloids	D	p10y
A06AB	113	57	370213	22929	1.44863	0.202937	0.808455	0.224618	2.24444	1.44514	3.48581	9.463e-13	0.0003192	-1	-1	D A06AB Contact laxatives	D	p10y
N06DX	152	18	391985	1157	2.45305	0.35539	1.00454	0.419398	2.73065	1.20025	6.21241	5.12e-12	0.01661	-1	-1	D N06DX Other anti-dementia drugs	D	p10y
N06DA	148	22	390511	2631	2.00143	0.32132	0.993094	0.366969	2.69957	1.31501	5.54193	4.706e-10	0.006806	-1	-1	D N06DA Anticholinesterases	D	p10y
A06AD	83	87	324553	68589	1.11822	0.187536	0.491019	0.211887	1.63398	1.07867	2.47518	2.483e-09	0.02048	-1	-1	D A06AD Osmotically acting laxatives	D	p10y
A11DA	157	13	390163	2979	1.92304	0.35054	1.53563	0.355449	4.64427	2.31397	9.3213	4.115e-08	1.559e-05	-1	-1	D A11DA Vitamin B1, plain	D	p10y
N06AX	135	35	366962	26180	1.21726	0.234214	0.338813	0.253454	1.40328	0.853892	2.30614	2.024e-07	0.1813	-1	0	D N06AX Other antidepressants	D	p10y
A11CC	128	42	358817	34325	1.03336	0.219497	0.685201	0.22571	1.98417	1.27483	3.08819	2.505e-06	0.002399	-1	-1	D A11CC Vitamin D and analogues	D	p10y
J07BB	3177	681	303160	89982	-0.190724	0.0446895	-0.169622	0.0472666	0.843984	0.769309	0.925908	1.975e-05	0.0003325	1	1	D J07BB Influenza vaccines	E	p10y
J07AL	3688	170	366548	26594	-0.247006	0.0795102	-0.164949	0.0831388	0.847937	0.720436	0.998002	0.001893	0.04725	1	1	D J07AL Pneumococcal vaccines	E	p10y
J07AM	3829	29	387493	5649	-0.438222	0.181949	-0.33741	0.184362	0.713616	0.497204	1.02422	0.01602	0.06723	1	0	D J07AM Tetanus vaccines	E	p10y
J07AP	3628	230	364435	28707	-0.153182	0.0651927	-0.054184	0.0700271	0.947258	0.825773	1.08661	0.01879	0.4391	1	0	D J07AP Typhoid vaccines	E	p10y
J07CA	3276	582	325108	68034	-0.0947669	0.0434021	-0.0527429	0.0460504	0.948624	0.866754	1.03823	0.029	0.2521	1	0	D J07CA Bacterial and viral vaccines, combined	E	p10y
N06DX	3773	85	391985	1157	2.05369	0.149058	1.36919	0.171168	3.93216	2.81147	5.49959	3.549e-43	1.257e-15	-1	-1	D N06DX Other anti-dementia drugs	E	p10y
N06DA	3743	115	390511	2631	1.59063	0.124057	1.06463	0.145411	2.89977	2.18066	3.85601	1.259e-37	2.456e-13	-1	-1	D N06DA Anticholinesterases	E	p10y
N02BE	1798	2060	229228	163914	0.403156	0.0343095	0.149715	0.0545438	1.1615	1.04374	1.29255	7.102e-32	0.006054	-1	-1	D N02BE Anilides	E	p10y
N02AJ	2339	1519	277191	115951	0.373822	0.0345888	0.151273	0.0529507	1.16331	1.04864	1.29053	3.196e-27	0.004279	-1	-1	D N02AJ Opioids in combination with non-opioid analgesics	E	p10y
A06AB	3412	446	370213	22929	0.572113	0.0597083	0.354003	0.0640338	1.42476	1.25671	1.61528	9.588e-22	3.234e-08	-1	-1	D A06AB Contact laxatives	E	p10y
J01CA	1667	2191	202608	190534	0.274694	0.0325046	0.202465	0.0332764	1.22442	1.14711	1.30694	2.899e-17	1.171e-09	-1	-1	D J01CA Penicillins with extended spectrum [DG:DG01780]	E	p10y
A06AD	2920	938	324553	68589	0.30804	0.0418399	0.0762654	0.0456439	1.07925	0.986891	1.18025	1.81e-13	0.09475	-1	0	D A06AD Osmotically acting laxatives	E	p10y
M01AE	2069	1789	233277	159865	0.236263	0.0321487	0.0838098	0.0356533	1.08742	1.01403	1.16613	1.999e-13	0.01874	-1	-1	D M01AE Propionic acid derivatives	E	p10y
N02AA	3473	385	370811	22331	0.433173	0.0621732	0.221548	0.0642198	1.24801	1.10041	1.41541	3.238e-12	0.000561	-1	-1	D N02AA Natural opium alkaloids	E	p10y
A02BC	1490	2368	172783	220359	0.226922	0.0334379	0.0699171	0.0367871	1.07242	0.997818	1.1526	1.151e-11	0.05736	-1	0	D A02BC Proton pump inhibitors [DG:DG01646]	E	p10y
J07BB	3177	681	19029	7948	-0.406926	0.0470885	-0.317784	0.0500832	0.72776	0.659714	0.802825	5.799e-18	2.254e-10	1	1	D J07BB Influenza vaccines	F	p10y
J07AL	3688	170	24839	2138	-0.407418	0.0830612	-0.210108	0.0874191	0.810496	0.682868	0.961978	9.388e-07	0.01625	1	1	D J07AL Pneumococcal vaccines	F	p10y
J07AP	3628	230	24963	2014	-0.268409	0.0697129	-0.130654	0.0742352	0.877521	0.758693	1.01496	0.0001183	0.07842	1	0	D J07AP Typhoid vaccines	F	p10y
J07AM	3829	29	26495	482	-0.707346	0.188038	-0.516816	0.190737	0.596416	0.410381	0.866785	0.0001691	0.006741	1	1	D J07AM Tetanus vaccines	F	p10y
N06DX	3773	85	26740	237	1.28844	0.159442	0.854946	0.181418	2.35125	1.64766	3.35527	6.66e-16	2.457e-06	-1	-1	D N06DX Other anti-dementia drugs	F	p10y
N06DA	3743	115	26556	421	1.05762	0.134295	0.70909	0.1531	2.03214	1.50532	2.74333	3.51e-15	3.644e-06	-1	-1	D N06DA Anticholinesterases	F	p10y
N02AJ	2339	1519	16615	10362	0.157998	0.037322	0.190064	0.0570065	1.20933	1.08148	1.35229	2.309e-05	0.0008568	-1	-1	D N02AJ Opioids in combination with non-opioid analgesics	F	p10y
N05AX	3793	65	26709	268	0.558457	0.170599	0.244673	0.179693	1.2772	0.898047	1.81644	0.001063	0.1733	-1	0	D N05AX Other antipsychotics	F	p10y
N02BE	1798	2060	11963	15014	0.111355	0.0371443	0.0262123	0.0576396	1.02656	0.916894	1.14934	0.002721	0.6493	-1	0	D N02BE Anilides	F	p10y
D01BA	3595	263	25338	1639	0.204247	0.0694162	0.223279	0.0699925	1.25017	1.0899	1.434	0.00326	0.001424	-1	-1	D D01BA Antifungals for systemic use	F	p10y
C07CB	3848	10	26935	42	0.951973	0.376575	0.925234	0.382565	2.52246	1.19171	5.3392	0.01148	0.01559	-1	-1	D C07CB Beta blocking agents, selective, and other diuretics	F	p10y
D06BA	3823	35	26802	175	0.518194	0.205338	0.497686	0.207725	1.64491	1.09476	2.47152	0.01162	0.01659	-1	-1	D D06BA Sulfonamides	F	p10y
N02BG	3719	139	26081	896	0.253931	0.103451	0.36659	0.106469	1.44281	1.17106	1.77762	0.01411	0.0005757	-1	-1	D N02BG Other analgesics and antipyretics	F	p10y
J01CA	1667	2191	11446	15531	0.0795039	0.0353438	0.107657	0.0363298	1.11367	1.03712	1.19586	0.02449	0.003046	-1	-1	D J01CA Penicillins with extended spectrum [DG:DG01780]	F	p10y
J07BB	1034	284	19029	7948	-0.379574	0.0766135	-0.327555	0.0802687	0.720684	0.615768	0.843476	7.297e-07	4.502e-05	1	1	D J07BB Influenza vaccines	G	p10y
J07AL	1253	65	24839	2138	-0.40361	0.137435	-0.196903	0.143516	0.82127	0.619898	1.08806	0.00332	0.1701	1	0	D J07AL Pneumococcal vaccines	G	p10y
J07CA	1145	173	22409	4568	-0.247498	0.0858446	-0.201356	0.0864358	0.817622	0.6902	0.968567	0.003941	0.01984	1	1	D J07CA Bacterial and viral vaccines, combined	G	p10y
N06DX	1275	43	26740	237	1.3752	0.213895	0.820597	0.245469	2.27186	1.4042	3.67564	1.302e-10	0.0008299	-1	-1	D N06DX Other anti-dementia drugs	G	p10y
N06DA	1263	55	26556	421	1.09953	0.189557	0.609981	0.215968	1.8404	1.20523	2.81029	6.682e-09	0.00474	-1	-1	D N06DA Anticholinesterases	G	p10y
A06AB	1072	246	23844	3133	0.445863	0.0894735	0.319999	0.0964076	1.37713	1.14001	1.66356	6.291e-07	0.0009038	-1	-1	D A06AB Contact laxatives	G	p10y
N05CD	1248	70	26103	874	0.617342	0.139893	0.543893	0.144757	1.7227	1.29714	2.28788	1.023e-05	0.0001721	-1	-1	D N05CD Benzodiazepine derivatives	G	p10y
N05AX	1279	39	26709	268	0.942984	0.217894	0.502828	0.232886	1.65339	1.04745	2.60986	1.512e-05	0.03085	-1	-1	D N05AX Other antipsychotics	G	p10y
A06AA	1166	152	24906	2071	0.42849	0.104876	0.282253	0.113187	1.32611	1.06226	1.6555	4.407e-05	0.01265	-1	-1	D A06AA Softeners, emollients	G	p10y
B03BB	1138	180	24596	2381	0.304564	0.103642	0.258658	0.105831	1.29519	1.05256	1.59375	0.003299	0.01453	-1	-1	D B03BB Folic acid and derivatives	G	p10y
P03AC	1281	37	26595	382	0.542915	0.196346	0.491248	0.198833	1.63436	1.10686	2.41324	0.005694	0.01349	-1	-1	D P03AC Pyrethrines, incl. synthetic compounds	G	p10y
N02BG	1254	64	26081	896	0.397332	0.154705	0.318607	0.158261	1.37521	1.00844	1.87537	0.01022	0.04411	-1	-1	D N02BG Other analgesics and antipyretics	G	p10y
J05AH	1304	14	26865	112	0.843461	0.329017	0.570098	0.337547	1.76844	0.912551	3.42707	0.01036	0.09124	-1	0	D J05AH Neuraminidase inhibitors [DG:DG02842]	G	p10y
J07BB	137	33	19029	7948	-0.685824	0.219062	-0.564572	0.227272	0.568604	0.364206	0.887712	0.001746	0.01299	1	1	D J07BB Influenza vaccines	H	p10y
N05CD	138	32	26103	874	2.01713	0.23885	1.61493	0.280504	5.02752	2.9012	8.71224	3.186e-17	8.643e-09	-1	-1	D N05CD Benzodiazepine derivatives	H	p10y
N05AX	155	15	26709	268	2.10649	0.355632	0.956975	0.42311	2.60381	1.13616	5.96729	3.195e-09	0.02372	-1	-1	D N05AX Other antipsychotics	H	p10y
N06DX	152	18	26740	237	1.90505	0.339965	0.785092	0.419283	2.19261	0.963943	4.98736	2.119e-08	0.06115	-1	0	D N06DX Other anti-dementia drugs	H	p10y
N02AA	120	50	23864	3113	1.1205	0.208284	0.560424	0.242348	1.75142	1.08916	2.81634	7.523e-08	0.02076	-1	-1	D N02AA Natural opium alkaloids	H	p10y
A06AB	113	57	23844	3133	1.01698	0.204242	0.563977	0.232075	1.75765	1.11527	2.77002	6.42e-07	0.0151	-1	-1	D A06AB Contact laxatives	H	p10y
N06DA	148	22	26556	421	1.59368	0.323562	0.917344	0.381888	2.50263	1.18391	5.29025	8.466e-07	0.01631	-1	-1	D N06DA Anticholinesterases	H	p10y
A11DA	157	13	26453	524	1.46858	0.35317	1.06324	0.381562	2.89574	1.37075	6.11731	3.216e-05	0.005331	-1	-1	D A11DA Vitamin B1, plain	H	p10y
A06AD	83	87	19222	7755	0.720523	0.186707	0.382382	0.215575	1.46577	0.960639	2.23652	0.0001141	0.07611	-1	0	D A06AD Osmotically acting laxatives	H	p10y
N06AX	135	35	23986	2991	0.88644	0.233745	0.158109	0.268596	1.17129	0.691873	1.98292	0.0001496	0.5561	-1	0	D N06AX Other antidepressants	H	p10y
A11CC	128	42	23475	3502	0.74799	0.22288	0.540289	0.233876	1.7165	1.08532	2.71475	0.0007918	0.02089	-1	-1	D A11CC Vitamin D and analogues	H	p10y

## Sheet: D-Drug_Con_Tw-Model-Spe_Top20
D Controlling for top 20 other protective or harmful drugs
drug	case_notx	case_tx	ctrl_notx	ctrl_tx	beta1	se1	beta2	se2	OR2	conf.low2	conf.high2	p1	p2	sig1	sig2	diff	Full name	Model	Windows
C10AA	673	645	1547	993	-0.565922	0.0918044	-0.534326	0.09956	0.586064	0.482139	0.71239	7.805e-10	8.49e-08	1	1		D C10AA HMG CoA reductase inhibitors [DG:DG01660]	A	p10y
C09AA	922	396	1962	578	-0.299088	0.102775	-0.20851	0.114457	0.811793	0.648617	1.01602	0.003634	0.06858	1	0		D C09AA ACE inhibitors, plain [DG:DG01501]	A	p10y
N02AJ	767	551	1572	968	-0.222404	0.0784052	-0.0680077	0.123418	0.934253	0.733462	1.19001	0.004584	0.5816	1	0		D N02AJ Opioids in combination with non-opioid analgesics	A	p10y
A02BC	494	824	996	1544	-0.211058	0.0759279	-0.190976	0.0845226	0.826153	0.69999	0.975055	0.005467	0.02391	1	1		D A02BC Proton pump inhibitors [DG:DG01646]	A	p10y
M01AE	745	573	1324	1216	-0.201482	0.0738257	-0.176499	0.0837722	0.8382	0.711243	0.987819	0.006379	0.03519	1	1		D M01AE Propionic acid derivatives	A	p10y
N02BE	531	787	1267	1273	-0.194308	0.0789139	-0.270016	0.127474	0.763367	0.594556	0.980109	0.01385	0.03422	1	1		D N02BE Anilides	A	p10y
H03AA	1227	91	2343	197	-0.37046	0.153014	-0.347535	0.161156	0.706427	0.515048	0.968919	0.01552	0.03111	1	1		D H03AA Thyroid hormones	A	p10y
R03BA	1187	131	2260	280	-0.336734	0.143092	-0.419455	0.151996	0.657405	0.487992	0.885632	0.01866	0.005814	1	1		D R03BA Glucocorticoids	A	p10y
S01EE	1281	37	2469	71	-0.554996	0.245922	-0.534908	0.257328	0.585723	0.353659	0.970064	0.02408	0.03771	1	1		D S01EE Prostaglandin analogues	A	p10y
C08CA	911	407	1976	564	-0.20595	0.0995982	-0.0476607	0.109674	0.953457	0.768983	1.18219	0.03873	0.6639	1	0		D C08CA Dihydropyridine derivatives [DG:DG01928]	A	p10y
C09CA	1123	195	2275	265	-0.271434	0.132488	-0.155539	0.143146	0.855954	0.646496	1.13327	0.04055	0.2773	1	0		D C09CA Angiotensin II receptor blockers, plain [DG:DG01495]	A	p10y
A10BA	1123	195	2324	216	-0.357318	0.178845	-0.055656	0.191643	0.945864	0.649606	1.37723	0.0458	0.7715	1	0		D A10BA Biguanides [DG:DG01684]	A	p10y
A01AB	3791	67	26575	402	0.36888	0.138842	0.380398	0.140847	1.46287	1.10997	1.92796	0.007892	0.006921	-1	-1	0	D A01AB Antiinfectives and antiseptics for local oral treatment	F	p6m
A01AB	1286	32	26575	402	0.55235	0.20216	0.352137	0.20913	1.4221	0.943868	2.14265	0.006294	0.09223	-1	0	-1	D A01AB Antiinfectives and antiseptics for local oral treatment	G	p6m
A02BC	1879	1979	213522	179620	0.207864	0.03319	0.0153419	0.0377173	1.01546	0.9431	1.09337	3.784e-10	0.6842	-1	0	-1	D A02BC Proton pump inhibitors [DG:DG01646]	E	p5yr
A02BC	2870	988	321442	71700	0.375515	0.0413872	0.122372	0.0440592	1.13017	1.03667	1.23211	1.161e-19	0.005479	-1	-1	0	D A02BC Proton pump inhibitors [DG:DG01646]	E	p6m
A02BX	3646	212	379470	13672	0.471688	0.0772854	0.213428	0.0792257	1.23791	1.05987	1.44587	1.041e-09	0.007062	-1	-1	0	D A02BX Other drugs for peptic ulcer and gastro-oesophageal reflux disease (GORD)	E	p2yr
A02BX	3489	369	367610	25532	0.402279	0.0596418	0.196011	0.0621663	1.21654	1.07699	1.37418	1.533e-11	0.001616	-1	-1	0	D A02BX Other drugs for peptic ulcer and gastro-oesophageal reflux disease (GORD)	E	p5yr
A03BB	1274	44	2507	33	0.710323	0.257488	0.0559124	0.324657	1.05751	0.55956	1.99857	0.005831	0.8633	-1	0	-1	D A03BB Belladonna alkaloids, semisynthetic, quaternary ammonium compounds	A	p1yr
A03BB	152	18	3629	59	1.7103	0.356846	-0.270208	0.612407	0.763221	0.229722	2.5357	1.707e-06	0.6591	-1	0	-1	D A03BB Belladonna alkaloids, semisynthetic, quaternary ammonium compounds	B	p1yr
A03BB	1274	44	390072	3070	1.27715	0.170755	0.249536	0.201303	1.28343	0.865011	1.90424	7.48e-14	0.2151	-1	0	-1	D A03BB Belladonna alkaloids, semisynthetic, quaternary ammonium compounds	C	p1yr
A03BB	152	18	390072	3070	2.57824	0.281024	0.322127	0.417397	1.38006	0.608987	3.12743	4.56e-20	0.4403	-1	0	-1	D A03BB Belladonna alkaloids, semisynthetic, quaternary ammonium compounds	D	p1yr
A03BB	3781	77	390072	3070	0.892119	0.122851	0.356938	0.132886	1.42895	1.10129	1.85408	3.826e-13	0.007231	-1	-1	0	D A03BB Belladonna alkaloids, semisynthetic, quaternary ammonium compounds	E	p1yr
A03BB	1274	44	26410	567	0.493137	0.176992	0.106543	0.19796	1.11243	0.754675	1.63977	0.005336	0.5904	-1	0	-1	D A03BB Belladonna alkaloids, semisynthetic, quaternary ammonium compounds	G	p1yr
A03BB	152	18	26410	567	1.81979	0.292264	0.400329	0.407232	1.49232	0.671752	3.31522	4.838e-10	0.3256	-1	0	-1	D A03BB Belladonna alkaloids, semisynthetic, quaternary ammonium compounds	H	p1yr
A03BB	152	18	3594	94	1.28655	0.336242	0.0320539	0.255074	1.03257	0.626228	1.70259	0.0001322	0.9	-1	0	-1	D A03BB Belladonna alkaloids, semisynthetic, quaternary ammonium compounds	A	p2yr
A03BB	152	18	3594	94	1.28655	0.336242	-0.506109	0.581106	0.602837	0.192932	1.88363	0.0001322	0.3838	-1	0	-1	D A03BB Belladonna alkaloids, semisynthetic, quaternary ammonium compounds	B	p2yr
N01BB	163	7	3346	342	-1.05331	0.461844	-1.04085	0.475298	0.353156	0.13908	0.896745	0.02262	0.02859	1	1		D N01BB Amides	B	p10y
A03BB	1261	57	387759	5383	1.02896	0.149187	0.29301	0.166501	1.34046	0.967221	1.85771	5.314e-12	0.07844	-1	0	-1	D A03BB Belladonna alkaloids, semisynthetic, quaternary ammonium compounds	C	p2yr
A03BB	152	18	387759	5383	2.10406	0.277629	0.182529	0.396132	1.20025	0.552182	2.60892	3.498e-14	0.645	-1	0	-1	D A03BB Belladonna alkaloids, semisynthetic, quaternary ammonium compounds	D	p2yr
A03BB	3746	112	387759	5383	0.738336	0.100495	0.344367	0.106119	1.4111	1.14612	1.73734	2.031e-13	0.001174	-1	-1	0	D A03BB Belladonna alkaloids, semisynthetic, quaternary ammonium compounds	E	p2yr
A03BB	1261	57	26146	831	0.386467	0.154605	0.137278	0.169023	1.14715	0.823646	1.59771	0.01244	0.4167	-1	0	-1	D A03BB Belladonna alkaloids, semisynthetic, quaternary ammonium compounds	G	p2yr
A03BB	152	18	26146	831	1.48921	0.288058	0.167783	0.40354	1.18268	0.536238	2.60841	2.359e-07	0.6776	-1	0	-1	D A03BB Belladonna alkaloids, semisynthetic, quaternary ammonium compounds	H	p2yr
A03BB	150	20	3516	172	0.914211	0.312803	-0.53656	0.464943	0.584756	0.235012	1.45499	0.003491	0.2486	-1	0	-1	D A03BB Belladonna alkaloids, semisynthetic, quaternary ammonium compounds	B	p5yr
A03BB	150	20	380955	12187	1.36687	0.26938	-0.0611549	0.336171	0.940678	0.486733	1.81799	3.894e-07	0.8556	-1	0	-1	D A03BB Belladonna alkaloids, semisynthetic, quaternary ammonium compounds	D	p5yr
A03BB	3666	192	380955	12187	0.449476	0.0772786	0.177263	0.0801288	1.19395	1.02042	1.39698	6.021e-09	0.02695	-1	-1	0	D A03BB Belladonna alkaloids, semisynthetic, quaternary ammonium compounds	E	p5yr
A03BB	150	20	25405	1572	0.902858	0.276393	-0.0526326	0.342495	0.948728	0.484838	1.85647	0.00109	0.8779	-1	0	-1	D A03BB Belladonna alkaloids, semisynthetic, quaternary ammonium compounds	H	p5yr
A03BB	152	18	3653	35	2.19173	0.386928	0.0459405	0.702892	1.04701	0.263912	4.15379	1.583e-08	0.9479	-1	0	-1	D A03BB Belladonna alkaloids, semisynthetic, quaternary ammonium compounds	B	p6m
A03BB	1285	33	391773	1369	1.76489	0.197564	0.277776	0.247302	1.32019	0.813078	2.14359	4.154e-19	0.2613	-1	0	-1	D A03BB Belladonna alkaloids, semisynthetic, quaternary ammonium compounds	C	p6m
A03BB	152	18	391773	1369	3.46886	0.285931	0.752179	0.472889	2.12162	0.839735	5.36034	7.268e-34	0.1117	-1	0	-1	D A03BB Belladonna alkaloids, semisynthetic, quaternary ammonium compounds	D	p6m
A03BB	3805	53	391773	1369	1.3086	0.149662	0.394812	0.170778	1.48411	1.06193	2.07411	2.264e-18	0.02079	-1	-1	0	D A03BB Belladonna alkaloids, semisynthetic, quaternary ammonium compounds	E	p6m
A03BB	1285	33	26607	370	0.641152	0.204607	0.0500185	0.239854	1.05129	0.656977	1.68227	0.001729	0.8348	-1	0	-1	D A03BB Belladonna alkaloids, semisynthetic, quaternary ammonium compounds	G	p6m
A03BB	152	18	26607	370	2.2843	0.298128	0.444607	0.464724	1.55988	0.627334	3.87866	1.889e-14	0.3387	-1	0	-1	D A03BB Belladonna alkaloids, semisynthetic, quaternary ammonium compounds	H	p6m
A03FA	1289	29	391336	1806	1.4069	0.207979	0.528288	0.224898	1.69603	1.09144	2.63552	1.338e-11	0.01882	-1	-1	0	D A03FA Propulsives [DG:DG01763]	C	p1yr
A03FA	1253	65	2484	56	0.750214	0.210686	0.596903	0.228276	1.81648	1.16108	2.84186	0.0003742	0.008962	-1	-1	0	D A03FA Propulsives [DG:DG01763]	A	p5yr
A03FA	1253	65	384790	8352	0.714505	0.141863	0.28056	0.146208	1.32387	0.994015	1.76319	4.741e-07	0.055	-1	0	-1	D A03FA Propulsives [DG:DG01763]	C	p5yr
A03FA	1295	23	2535	5	2.06951	0.580484	1.53047	0.626778	4.62037	1.35205	15.7892	0.0003681	0.01466	-1	-1	0	D A03FA Propulsives [DG:DG01763]	A	p6m
A03FA	1295	23	392314	828	1.84021	0.240775	0.494312	0.268063	1.63937	0.969395	2.77239	2.129e-14	0.06518	-1	0	-1	D A03FA Propulsives [DG:DG01763]	C	p6m
C10AA	673	645	227807	165335	-0.462727	0.0736143	-0.446337	0.0776452	0.639968	0.549625	0.745161	3.265e-10	9.015e-09	1	1		D C10AA HMG CoA reductase inhibitors [DG:DG01660]	C	p10y
C09AA	922	396	301468	91674	-0.304903	0.0798651	-0.249028	0.0841867	0.779558	0.66098	0.919409	0.0001347	0.003096	1	1		D C09AA ACE inhibitors, plain [DG:DG01501]	C	p10y
H03AA	1227	91	357442	35700	-0.468503	0.125101	-0.483669	0.125432	0.616517	0.482144	0.788339	0.0001804	0.0001153	1	1		D H03AA Thyroid hormones	C	p10y
A10BA	1123	195	363701	29441	-0.378029	0.139918	-0.208264	0.143402	0.811993	0.613039	1.07551	0.006897	0.1464	1	0		D A10BA Biguanides [DG:DG01684]	C	p10y
S01EE	1281	37	379672	13470	-0.477187	0.198631	-0.387508	0.225936	0.678746	0.435903	1.05688	0.01629	0.08632	1	0		D S01EE Prostaglandin analogues	C	p10y
R03BA	1187	131	354234	38908	-0.274146	0.116348	-0.283232	0.116683	0.753345	0.59934	0.946924	0.01846	0.01521	1	1		D R03BA Glucocorticoids	C	p10y
C09CA	1123	195	350237	42905	-0.231048	0.100393	-0.203775	0.103291	0.815646	0.666162	0.998673	0.02137	0.04852	1	1		D C09CA Angiotensin II receptor blockers, plain [DG:DG01495]	C	p10y
J07BB	1034	284	303160	89982	-0.169588	0.0750606	-0.1759	0.0755245	0.838702	0.723304	0.972511	0.02386	0.01986	1	1		D J07BB Influenza vaccines	C	p10y
J07CA	1145	173	325108	68034	-0.185938	0.0839763	-0.147444	0.0842766	0.86291	0.731525	1.01789	0.02682	0.0802	1	0		D J07CA Bacterial and viral vaccines, combined	C	p10y
C08CA	911	407	298812	94330	-0.170048	0.0772676	-0.0835997	0.0803215	0.919799	0.78582	1.07662	0.02775	0.298	1	0		D C08CA Dihydropyridine derivatives [DG:DG01928]	C	p10y
G03CA	1186	132	333905	59237	-0.214131	0.101289	-0.275627	0.102029	0.759096	0.621512	0.927138	0.03451	0.006904	1	1		D G03CA Natural and semisynthetic estrogens, plain	C	p10y
S01ED	1298	20	385373	7769	-0.550756	0.272596	-0.281433	0.309831	0.754702	0.411193	1.38517	0.04334	0.3637	1	0		D S01ED Beta blocking agents	C	p10y
A06AA	1243	75	2510	30	1.36319	0.276291	0.970844	0.314337	2.64017	1.42555	4.88969	8.404e-07	0.002026	-1	-1	0	D A06AA Softeners, emollients	A	p1yr
A06AA	1243	75	389191	3951	1.38403	0.145393	0.389039	0.162925	1.47556	1.0722	2.03067	1.753e-21	0.01695	-1	-1	0	D A06AA Softeners, emollients	C	p1yr
A06AA	158	12	389191	3951	1.39671	0.342178	-0.321424	0.38522	0.725116	0.340805	1.54279	4.469e-05	0.4041	-1	0	-1	D A06AA Softeners, emollients	D	p1yr
A06AA	3753	105	389191	3951	0.813822	0.120999	0.187687	0.130135	1.20646	0.934846	1.55698	1.748e-11	0.1492	-1	0	-1	D A06AA Softeners, emollients	E	p1yr
A06AA	1243	75	26198	779	0.655905	0.15002	0.276788	0.165974	1.31889	0.952629	1.82596	1.235e-05	0.0954	-1	0	-1	D A06AA Softeners, emollients	G	p1yr
A06AA	1226	92	387392	5750	1.25761	0.130884	0.374237	0.145371	1.45388	1.09342	1.93317	7.396e-22	0.01004	-1	-1	0	D A06AA Softeners, emollients	C	p2yr
A06AA	156	14	387392	5750	1.25276	0.31381	-0.251293	0.351065	0.777794	0.390874	1.54772	6.551e-05	0.4741	-1	0	-1	D A06AA Softeners, emollients	D	p2yr
A06AA	3728	130	387392	5750	0.643946	0.108827	0.0786986	0.116719	1.08188	0.86065	1.35997	3.279e-09	0.5001	-1	0	-1	D A06AA Softeners, emollients	E	p2yr
A06AA	1226	92	25935	1042	0.587707	0.135136	0.225	0.149681	1.25232	0.933903	1.67931	1.372e-05	0.1328	-1	0	-1	D A06AA Softeners, emollients	G	p2yr
A06AA	1196	122	2470	70	1.00054	0.186852	0.695267	0.209097	2.00424	1.33018	3.01989	9.072e-08	0.0008923	-1	-1	0	D A06AA Softeners, emollients	A	p5yr
A06AA	1196	122	383186	9956	1.04457	0.113473	0.43279	0.123991	1.54155	1.20897	1.96562	3.418e-20	0.0004822	-1	-1	0	D A06AA Softeners, emollients	C	p5yr
A06AA	152	18	383186	9956	1.09864	0.274384	-0.071649	0.299824	0.930858	0.517215	1.67531	6.229e-05	0.8111	-1	0	-1	D A06AA Softeners, emollients	D	p5yr
A06AA	3666	192	383186	9956	0.540918	0.0872204	0.149715	0.0930035	1.1615	0.967955	1.39375	5.59e-10	0.1074	-1	0	-1	D A06AA Softeners, emollients	E	p5yr
A06AA	1196	122	25403	1574	0.479067	0.117043	0.237585	0.128033	1.26818	0.986723	1.62993	4.269e-05	0.06351	-1	0	-1	D A06AA Softeners, emollients	G	p5yr
A06AA	1251	67	2518	22	1.53156	0.31421	1.11748	0.347951	3.05715	1.54542	6.04767	1.136e-06	0.001331	-1	-1	0	D A06AA Softeners, emollients	A	p6m
A06AA	1251	67	390791	2351	1.74601	0.155368	0.53893	0.182649	1.71417	1.19835	2.45203	2.685e-29	0.003171	-1	-1	0	D A06AA Softeners, emollients	C	p6m
N01BB	163	7	358911	34231	-1.00688	0.444458	-1.26559	0.45129	0.282074	0.116472	0.68313	0.02349	0.005042	1	1		D N01BB Amides	D	p10y
J07BB	137	33	303160	89982	-0.476154	0.216539	-0.523372	0.220689	0.592519	0.38446	0.913175	0.02788	0.01771	1	1		D J07BB Influenza vaccines	D	p10y
A06AA	158	12	390791	2351	1.89969	0.346635	-0.320028	0.432901	0.726129	0.310832	1.69629	4.247e-08	0.4597	-1	0	-1	D A06AA Softeners, emollients	D	p6m
A06AA	1251	67	26392	585	0.829641	0.160421	0.393716	0.180012	1.48248	1.04173	2.1097	2.336e-07	0.02874	-1	-1	0	D A06AA Softeners, emollients	G	p6m
A06AA	158	12	26392	585	1.1488	0.34813	-0.181477	0.415579	0.834037	0.369342	1.8834	0.0009684	0.6623	-1	0	-1	D A06AA Softeners, emollients	H	p6m
A06AB	1189	129	2476	64	0.959996	0.195754	0.235769	0.231698	1.26588	0.803728	1.99378	9.776e-07	0.3089	-1	0	-1	D A06AB Contact laxatives	A	p1yr
A06AB	134	36	3531	157	1.13353	0.265477	0.406289	0.326441	1.50124	0.791578	2.84711	2.004e-05	0.2134	-1	0	-1	D A06AB Contact laxatives	B	p1yr
A06AB	1189	129	387741	5401	1.53549	0.117714	0.716106	0.133034	2.04645	1.57675	2.65607	6.981e-39	7.334e-08	-1	-1	0	D A06AB Contact laxatives	C	p1yr
A06AB	134	36	387741	5401	2.26436	0.234731	1.10375	0.274691	3.01546	1.76009	5.16621	5.108e-22	5.866e-05	-1	-1	0	D A06AB Contact laxatives	D	p1yr
A06AB	3665	193	387741	5401	1.10902	0.0915779	0.573919	0.101152	1.77521	1.45596	2.16447	9.467e-34	1.397e-08	-1	-1	0	D A06AB Contact laxatives	E	p1yr
A06AB	3665	193	25854	1123	0.300211	0.0976098	0.347266	0.101314	1.41519	1.16031	1.72607	0.002102	0.0006097	-1	-1	0	D A06AB Contact laxatives	F	p1yr
A06AB	1189	129	25854	1123	0.785105	0.120496	0.483962	0.13725	1.62249	1.23979	2.12332	7.36e-11	0.0004224	-1	-1	0	D A06AB Contact laxatives	G	p1yr
A06AB	134	36	25854	1123	1.51531	0.233315	0.67971	0.28148	1.9733	1.13655	3.42611	8.463e-11	0.01575	-1	-1	0	D A06AB Contact laxatives	H	p1yr
A06AB	126	44	3488	200	1.17996	0.247804	0.241671	0.210732	1.27338	0.84241	1.92482	1.991e-06	0.2515	-1	0	-1	D A06AB Contact laxatives	A	p2yr
A06AB	126	44	3488	200	1.17996	0.247804	0.625821	0.308398	1.86978	1.02141	3.42281	1.991e-06	0.0425	-1	-1	0	D A06AB Contact laxatives	B	p2yr
A06AB	1157	161	385083	8059	1.4119	0.106098	0.693588	0.120965	2.00088	1.57854	2.53622	2.134e-40	9.829e-09	-1	-1	0	D A06AB Contact laxatives	C	p2yr
A06AB	126	44	385083	8059	2.17907	0.217379	1.21416	0.258304	3.36745	2.0297	5.58691	1.2e-23	2.596e-06	-1	-1	0	D A06AB Contact laxatives	D	p2yr
A06AB	3614	244	385083	8059	0.950941	0.0815868	0.500649	0.0905893	1.64979	1.3814	1.97033	2.175e-31	3.267e-08	-1	-1	0	D A06AB Contact laxatives	E	p2yr
A06AB	3614	244	25495	1482	0.250852	0.087224	0.300986	0.0906888	1.35119	1.13115	1.61404	0.004031	0.0009048	-1	-1	0	D A06AB Contact laxatives	F	p2yr
A06AB	1157	161	25495	1482	0.74464	0.109097	0.488519	0.125319	1.6299	1.27492	2.08371	8.938e-12	9.714e-05	-1	-1	0	D A06AB Contact laxatives	G	p2yr
J07BB	3177	681	303160	89982	-0.190724	0.0446895	-0.171138	0.0472665	0.842706	0.768144	0.924505	1.975e-05	0.0002938	1	1		D J07BB Influenza vaccines	E	p10y
H03AA	3570	288	357442	35700	-0.204912	0.0640676	-0.233776	0.0641494	0.791539	0.69802	0.897587	0.001382	0.0002682	1	1		D H03AA Thyroid hormones	E	p10y
J07AL	3688	170	366548	26594	-0.247006	0.0795102	-0.170773	0.0831435	0.843013	0.716246	0.992217	0.001893	0.03998	1	1		D J07AL Pneumococcal vaccines	E	p10y
P01BB	3751	107	376535	16607	-0.25693	0.0915474	-0.17192	0.0942437	0.842046	0.700028	1.01288	0.005008	0.06812	1	0		D P01BB Biguanides	E	p10y
C09AA	2884	974	301468	91674	-0.123071	0.0465245	-0.138711	0.0468215	0.870479	0.794152	0.954142	0.008162	0.003051	1	1		D C09AA ACE inhibitors, plain [DG:DG01501]	E	p10y
J07AM	3829	29	387493	5649	-0.438222	0.181949	-0.341978	0.184363	0.710364	0.494937	1.01956	0.01602	0.06361	1	0		D J07AM Tetanus vaccines	E	p10y
S01EC	3818	40	386551	6591	-0.407041	0.169813	-0.381081	0.170208	0.683123	0.489347	0.953632	0.01653	0.02516	1	1		D S01EC Carbonic anhydrase inhibitors	E	p10y
J07AP	3628	230	364435	28707	-0.153182	0.0651927	-0.0531998	0.0700512	0.948191	0.826547	1.08774	0.01879	0.4476	1	0		D J07AP Typhoid vaccines	E	p10y
J07CA	3276	582	325108	68034	-0.0947669	0.0434021	-0.0531739	0.0460597	0.948215	0.866365	1.0378	0.029	0.2483	1	0		D J07CA Bacterial and viral vaccines, combined	E	p10y
C01BC	3843	15	390651	2491	-0.600424	0.296483	-0.609307	0.297369	0.543727	0.303571	0.973874	0.04285	0.04046	1	1		D C01BC Antiarrhythmics, class Ic [DG:DG01650]	E	p10y
A06AB	126	44	25495	1482	1.49826	0.21818	0.85555	0.266053	2.35267	1.39665	3.9631	6.693e-12	0.001303	-1	-1	0	D A06AB Contact laxatives	H	p2yr
A06AB	1112	206	2402	138	0.703491	0.141922	0.189564	0.169936	1.20872	0.866225	1.68664	7.473e-07	0.2647	-1	0	-1	D A06AB Contact laxatives	A	p5yr
A06AB	118	52	3396	292	1.01287	0.231538	0.460803	0.283623	1.58535	0.909133	2.76453	1.249e-05	0.1043	-1	0	-1	D A06AB Contact laxatives	B	p5yr
A06AB	1112	206	378299	14843	1.10445	0.0942694	0.558169	0.106932	1.74747	1.41706	2.15492	1.07e-31	1.792e-07	-1	-1	0	D A06AB Contact laxatives	C	p5yr
A06AB	118	52	378299	14843	1.76224	0.207575	0.907574	0.237076	2.4783	1.55723	3.94416	2.079e-17	0.0001291	-1	-1	0	D A06AB Contact laxatives	D	p5yr
A06AB	3514	344	378299	14843	0.737277	0.0676608	0.408414	0.0749355	1.50443	1.29893	1.74244	1.206e-27	5.034e-08	-1	-1	0	D A06AB Contact laxatives	E	p5yr
A06AB	3514	344	24708	2269	0.19909	0.0724176	0.233687	0.0751528	1.26325	1.09023	1.46373	0.005978	0.001876	-1	-1	0	D A06AB Contact laxatives	F	p5yr
A06AB	1112	206	24708	2269	0.594465	0.0966468	0.420249	0.110167	1.52234	1.22669	1.88925	7.807e-10	0.0001367	-1	-1	0	D A06AB Contact laxatives	G	p5yr
J07BB	3177	681	19029	7948	-0.406926	0.0470885	-0.32084	0.0501099	0.725539	0.657666	0.800417	5.799e-18	1.548e-10	1	1		D J07BB Influenza vaccines	F	p10y
G03CA	3360	498	22535	4442	-0.288051	0.0536156	-0.253802	0.0542143	0.775845	0.697631	0.862828	7.82e-08	2.86e-06	1	1		D G03CA Natural and semisynthetic estrogens, plain	F	p10y
J01MA	3538	320	23742	3235	-0.350481	0.0661666	-0.315114	0.0673871	0.729706	0.639419	0.832741	1.186e-07	2.935e-06	1	1		D J01MA Fluoroquinolones [DG:DG01549]	F	p10y
J07AL	3688	170	24839	2138	-0.407418	0.0830612	-0.206651	0.0874272	0.813303	0.685222	0.965325	9.388e-07	0.0181	1	1		D J07AL Pneumococcal vaccines	F	p10y
J01CR	3222	636	21271	5706	-0.21125	0.0492804	-0.187799	0.0508322	0.828781	0.750187	0.915609	1.819e-05	0.0002207	1	1		D J01CR Combinations of penicillins, incl. beta-lactamase inhibitors	F	p10y
N03AX	3232	626	21752	5225	-0.221616	0.0524783	-0.23967	0.0556633	0.786887	0.705553	0.877597	2.418e-05	1.67e-05	1	1		D N03AX Other antiepileptics	F	p10y
J07AP	3628	230	24963	2014	-0.268409	0.0697129	-0.127332	0.0742911	0.880441	0.761134	1.01845	0.0001183	0.08655	1	0		D J07AP Typhoid vaccines	F	p10y
N02AX	3272	586	21923	5054	-0.202339	0.0534048	-0.204614	0.0568086	0.814962	0.729088	0.910951	0.0001517	0.0003165	1	1		D N02AX Other opioids	F	p10y
J07AM	3829	29	26495	482	-0.707346	0.188038	-0.51425	0.190729	0.597949	0.411442	0.868999	0.0001691	0.007017	1	1		D J07AM Tetanus vaccines	F	p10y
B01AB	3790	68	26143	834	-0.54816	0.146015	-0.501269	0.146944	0.605761	0.454169	0.807951	0.0001743	0.0006474	1	1		D B01AB Heparin group	F	p10y
A06AB	118	52	24708	2269	1.24881	0.20883	0.658158	0.240441	1.93123	1.20548	3.09391	2.259e-09	0.006199	-1	-1	0	D A06AB Contact laxatives	H	p5yr
A06AB	1210	108	2501	39	1.24306	0.231505	0.454223	0.275827	1.57495	0.917081	2.70474	8.366e-08	0.09969	-1	0	-1	D A06AB Contact laxatives	A	p6m
A06AB	136	34	3575	113	1.48043	0.280773	0.697992	0.354121	2.00971	1.00371	4.024	1.419e-07	0.04879	-1	-1	0	D A06AB Contact laxatives	B	p6m
A06AB	1210	108	390079	3063	1.87316	0.129207	0.769396	0.153628	2.15846	1.59726	2.91684	1.295e-47	5.497e-07	-1	-1	0	D A06AB Contact laxatives	C	p6m
A06AB	136	34	390079	3063	2.72223	0.244571	1.30734	0.309125	3.69633	2.0167	6.77483	8.991e-29	2.346e-05	-1	-1	0	D A06AB Contact laxatives	D	p6m
A06AB	3711	147	390079	3063	1.38455	0.104865	0.583253	0.116405	1.79186	1.42633	2.25106	8.571e-40	5.43e-07	-1	-1	0	D A06AB Contact laxatives	E	p6m
A06AB	3711	147	26155	822	0.332573	0.111545	0.401507	0.116114	1.49407	1.18996	1.87591	0.00287	0.0005452	-1	-1	0	D A06AB Contact laxatives	F	p6m
A06AB	1210	108	26155	822	0.893655	0.132177	0.556347	0.151362	1.74429	1.2965	2.34673	1.396e-11	0.0002377	-1	-1	0	D A06AB Contact laxatives	G	p6m
A06AB	136	34	26155	822	1.73389	0.242845	0.84765	0.305345	2.33416	1.28295	4.2467	9.575e-13	0.005506	-1	-1	0	D A06AB Contact laxatives	H	p6m
J07BB	1034	284	19029	7948	-0.379574	0.0766135	-0.326998	0.080328	0.721086	0.616039	0.844044	7.297e-07	4.698e-05	1	1		D J07BB Influenza vaccines	G	p10y
C10AA	673	645	13586	13391	-0.339531	0.0728412	-0.260825	0.0769777	0.770416	0.66252	0.895884	3.157e-06	0.0007042	1	1		D C10AA HMG CoA reductase inhibitors [DG:DG01660]	G	p10y
G03CA	1186	132	22535	4442	-0.415418	0.103094	-0.409139	0.104252	0.664222	0.541465	0.81481	5.604e-05	8.711e-05	1	1		D G03CA Natural and semisynthetic estrogens, plain	G	p10y
A02BC	494	824	8841	18136	-0.243509	0.0631195	-0.246922	0.0657568	0.781202	0.686734	0.888664	0.0001146	0.0001736	1	1		D A02BC Proton pump inhibitors [DG:DG01646]	G	p10y
C09AA	922	396	18950	8027	-0.28294	0.0806004	-0.219622	0.0828336	0.802822	0.682509	0.944345	0.0004481	0.008021	1	1		D C09AA ACE inhibitors, plain [DG:DG01501]	G	p10y
H03AA	1227	91	24308	2669	-0.421663	0.127072	-0.414739	0.128254	0.660513	0.513697	0.84929	0.0009069	0.001223	1	1		D H03AA Thyroid hormones	G	p10y
R03BA	1187	131	23664	3313	-0.375702	0.117836	-0.339154	0.11888	0.712373	0.564302	0.899297	0.001432	0.004335	1	1		D R03BA Glucocorticoids	G	p10y
J07AL	1253	65	24839	2138	-0.40361	0.137435	-0.193825	0.143602	0.823802	0.621703	1.0916	0.00332	0.1771	1	0		D J07AL Pneumococcal vaccines	G	p10y
J07CA	1145	173	22409	4568	-0.247498	0.0858446	-0.198576	0.0865111	0.819898	0.692019	0.971407	0.003941	0.02172	1	1		D J07CA Bacterial and viral vaccines, combined	G	p10y
S01EE	1281	37	25765	1212	-0.575568	0.201949	-0.571114	0.203185	0.564896	0.379323	0.841254	0.004374	0.004945	1	1		D S01EE Prostaglandin analogues	G	p10y
A06AD	1101	217	2393	147	0.918504	0.136253	0.583934	0.155805	1.79308	1.3211	2.43368	1.807e-11	0.000181	-1	-1	0	D A06AD Osmotically acting laxatives	A	p1yr
A06AD	121	49	3373	315	0.8186	0.226671	0.13056	0.27894	1.13947	0.659466	1.96884	0.0003084	0.6398	-1	0	-1	D A06AD Osmotically acting laxatives	B	p1yr
A06AD	1101	217	375078	18064	1.18437	0.0877414	0.602758	0.100653	1.82715	1.50003	2.22562	1.633e-41	2.12e-09	-1	-1	0	D A06AD Osmotically acting laxatives	C	p1yr
A06AD	121	49	375078	18064	1.60003	0.203273	0.450482	0.245641	1.56907	0.969507	2.53941	3.518e-15	0.06667	-1	0	-1	D A06AD Osmotically acting laxatives	D	p1yr
A06AD	3494	364	375078	18064	0.692792	0.0643489	0.271351	0.0709174	1.31174	1.14151	1.50734	5.015e-27	0.0001301	-1	-1	0	D A06AD Osmotically acting laxatives	E	p1yr
A06AD	1101	217	23975	3002	0.474176	0.08933	0.265107	0.0994519	1.30357	1.0727	1.58413	1.116e-07	0.007688	-1	-1	0	D A06AD Osmotically acting laxatives	G	p1yr
A06AD	121	49	23975	3002	0.920464	0.203716	0.160277	0.245032	1.17384	0.726151	1.89753	6.258e-06	0.513	-1	0	-1	D A06AD Osmotically acting laxatives	H	p1yr
A06AD	112	58	3275	413	0.735754	0.216592	0.569287	0.139061	1.76701	1.34534	2.32084	0.0006883	4.332e-05	-1	-1	0	D A06AD Osmotically acting laxatives	A	p2yr
A06AD	112	58	3275	413	0.735754	0.216592	0.113977	0.267442	1.12073	0.663408	1.8933	0.0006883	0.67	-1	0	-1	D A06AD Osmotically acting laxatives	B	p2yr
A06AD	1045	273	365925	27217	0.983794	0.0810106	0.442595	0.0929053	1.55674	1.29758	1.86766	6.258e-34	1.899e-06	-1	-1	0	D A06AD Osmotically acting laxatives	C	p2yr
A06AD	112	58	365925	27217	1.38585	0.196692	0.236701	0.241565	1.26706	0.789181	2.03432	1.847e-12	0.3272	-1	0	-1	D A06AD Osmotically acting laxatives	D	p2yr
A06AD	3387	471	365925	27217	0.510405	0.0573722	0.116454	0.0635534	1.12351	0.991924	1.27254	5.793e-19	0.0669	-1	0	-1	D A06AD Osmotically acting laxatives	E	p2yr
A06AD	1045	273	22899	4078	0.361074	0.0823777	0.15255	0.0926287	1.1648	0.97141	1.39669	1.174e-05	0.09959	-1	0	-1	D A06AD Osmotically acting laxatives	G	p2yr
A06AD	112	58	22899	4078	0.780717	0.196227	0.0540196	0.236804	1.05551	0.663565	1.67895	6.949e-05	0.8196	-1	0	-1	D A06AD Osmotically acting laxatives	H	p2yr
A06AD	955	363	2210	330	0.532692	0.101784	0.311171	0.11623	1.36502	1.08686	1.71438	1.752e-07	0.007456	-1	-1	0	D A06AD Osmotically acting laxatives	A	p5yr
A06AD	93	77	3072	616	0.861394	0.205235	0.414149	0.245434	1.51308	0.935154	2.44818	2.765e-05	0.0916	-1	0	-1	D A06AD Osmotically acting laxatives	B	p5yr
A06AD	955	363	345775	47367	0.711038	0.0732513	0.263897	0.0835578	1.30199	1.10531	1.53368	2.836e-22	0.001587	-1	-1	0	D A06AD Osmotically acting laxatives	C	p5yr
A06AD	93	77	345775	47367	1.29405	0.188411	0.403504	0.221735	1.49706	0.969387	2.31197	6.509e-12	0.0688	-1	0	-1	D A06AD Osmotically acting laxatives	D	p5yr
A06AD	3165	693	345775	47367	0.367368	0.047578	0.043391	0.0529335	1.04435	0.941428	1.15851	1.153e-14	0.4124	-1	0	-1	D A06AD Osmotically acting laxatives	E	p5yr
J07BB	137	33	19029	7948	-0.685824	0.219062	-0.601957	0.22904	0.547738	0.349628	0.858106	0.001746	0.008589	1	1		D J07BB Influenza vaccines	H	p10y
N01BB	163	7	23810	3167	-1.15525	0.447504	-1.2202	0.453298	0.295172	0.121398	0.717695	0.009841	0.007111	1	1		D N01BB Amides	H	p10y
D05AX	162	8	25081	1896	-1.03673	0.491699	-0.961956	0.500319	0.382145	0.14333	1.01887	0.035	0.05453	1	0		D D05AX Other antipsoriatics for topical use	H	p10y
L01BC	168	2	25654	1323	-1.52733	0.742391	-1.41081	0.749763	0.243946	0.0561134	1.06053	0.03967	0.05989	1	0		D L01BC Pyrimidine analogues	H	p10y
A02BC	64	106	8841	18136	-0.390715	0.190157	-0.546968	0.20777	0.578702	0.385117	0.869594	0.03992	0.008479	1	1		D A02BC Proton pump inhibitors [DG:DG01646]	H	p10y
S01XA	144	26	22226	4751	-0.546453	0.269768	-0.70779	0.285866	0.492732	0.281365	0.862882	0.04281	0.01329	1	1		D S01XA Other ophthalmologicals	H	p10y
G03CA	163	7	22535	4442	-0.885564	0.442551	-0.841835	0.450474	0.430919	0.178211	1.04197	0.0454	0.06166	1	0		D G03CA Natural and semisynthetic estrogens, plain	H	p10y
A06AD	955	363	20918	6059	0.20981	0.0744506	0.0406717	0.0844942	1.04151	0.882549	1.2291	0.004834	0.6303	-1	0	-1	D A06AD Osmotically acting laxatives	G	p5yr
A06AD	93	77	20918	6059	0.804962	0.187408	0.191418	0.218239	1.21097	0.789511	1.8574	1.751e-05	0.3804	-1	0	-1	D A06AD Osmotically acting laxatives	H	p5yr
A06AD	1165	153	2440	100	0.947507	0.159612	0.450962	0.185676	1.56982	1.09082	2.25917	3.174e-09	0.0152	-1	-1	0	D A06AD Osmotically acting laxatives	A	p6m
A06AD	131	39	3474	214	0.967676	0.24582	0.182636	0.305991	1.20038	0.658832	2.18706	8.414e-05	0.5506	-1	0	-1	D A06AD Osmotically acting laxatives	B	p6m
A06AD	1165	153	383979	9163	1.51258	0.100727	0.681871	0.118235	1.97757	1.56852	2.4933	5.907e-51	8.072e-09	-1	-1	0	D A06AD Osmotically acting laxatives	C	p6m
A06AD	131	39	383979	9163	2.00432	0.216555	0.49937	0.279368	1.64768	0.952959	2.84887	2.143e-20	0.07386	-1	0	-1	D A06AD Osmotically acting laxatives	D	p6m
A06AD	3605	253	383979	9163	1.05354	0.0755972	0.457942	0.0842521	1.58082	1.34019	1.86465	3.912e-44	5.471e-08	-1	-1	0	D A06AD Osmotically acting laxatives	E	p6m
A06AD	1165	153	24878	2099	0.495302	0.102638	0.231557	0.113532	1.26056	1.00907	1.57473	1.402e-06	0.0414	-1	-1	0	D A06AD Osmotically acting laxatives	G	p6m
A06AD	131	39	24878	2099	1.02857	0.217332	0.202727	0.263411	1.22474	0.730832	2.05243	2.226e-06	0.4415	-1	0	-1	D A06AD Osmotically acting laxatives	H	p6m
A07AA	1262	56	26261	716	0.36076	0.172029	0.213509	0.178373	1.23802	0.872747	1.75616	0.03599	0.2313	-1	0	-1	D A07AA Antibiotics	G	p2yr
A07AA	1228	90	2475	65	0.565803	0.19734	0.352159	0.211966	1.42214	0.93855	2.15489	0.004165	0.09672	-1	0	-1	D A07AA Antibiotics	A	p5yr
A09AB	3847	11	26952	25	1.04104	0.415029	0.890362	0.424939	2.43601	1.05915	5.60276	0.01213	0.03616	-1	-1	0	D A09AB Acid preparations	F	p1yr
A11CC	147	23	3491	197	1.00237	0.308048	0.600893	0.336901	1.82375	0.942112	3.53042	0.001148	0.07457	-1	0	-1	D A11CC Vitamin D and analogues	B	p2yr
A11CC	147	23	379586	13556	1.27537	0.261841	0.689613	0.279119	1.99294	1.15321	3.44415	1.112e-06	0.01349	-1	-1	0	D A11CC Vitamin D and analogues	D	p2yr
C10AA	854	464	1746	794	-0.69099	0.0943172	-0.621637	0.106322	0.537064	0.436009	0.661541	2.871e-13	5.435e-09	1	1		D C10AA HMG CoA reductase inhibitors [DG:DG01660]	A	p1yr
R03BA	1278	40	2418	122	-0.74423	0.220465	-0.862507	0.234027	0.422102	0.266778	0.66786	0.0007435	0.0002314	1	1		D R03BA Glucocorticoids	A	p1yr
C09AA	1098	220	2172	368	-0.385028	0.118341	-0.272978	0.134798	0.761109	0.584347	0.991342	0.00115	0.04293	1	1		D C09AA ACE inhibitors, plain [DG:DG01501]	A	p1yr
A02BC	862	456	1748	792	-0.257357	0.0846289	-0.401715	0.0938701	0.669171	0.556685	0.804387	0.002374	1.919e-05	1	1		D A02BC Proton pump inhibitors [DG:DG01646]	A	p1yr
S01EE	1295	23	2494	46	-0.809775	0.319461	-0.551105	0.353616	0.576313	0.288114	1.1528	0.01129	0.1192	1	0		D S01EE Prostaglandin analogues	A	p1yr
A10BA	1178	140	2367	173	-0.444842	0.184637	-0.104027	0.20174	0.901201	0.6068	1.33844	0.01603	0.6061	1	0		D A10BA Biguanides [DG:DG01684]	A	p1yr
H03AA	1234	84	2353	187	-0.369555	0.157201	-0.408618	0.167791	0.664568	0.478266	0.923441	0.01878	0.01493	1	1		D H03AA Thyroid hormones	A	p1yr
C08CA	1066	252	2159	381	-0.259785	0.110699	-0.00435364	0.121066	0.995656	0.785281	1.26239	0.01899	0.9713	1	0		D C08CA Dihydropyridine derivatives [DG:DG01928]	A	p1yr
C09CA	1195	123	2338	202	-0.348106	0.14914	-0.221642	0.167878	0.801202	0.5765	1.11349	0.01964	0.1868	1	0		D C09CA Angiotensin II receptor blockers, plain [DG:DG01495]	A	p1yr
S01ED	1308	10	2516	24	-0.941519	0.467088	-0.691116	0.509266	0.501017	0.184598	1.35981	0.0439	0.1748	1	0		D S01ED Beta blocking agents	A	p1yr
A11CC	147	23	25354	1623	0.889468	0.26789	0.556405	0.29303	1.74439	0.982212	3.09801	0.0009005	0.0576	-1	0	-1	D A11CC Vitamin D and analogues	H	p2yr
A11CC	133	37	3323	365	0.833641	0.258041	0.397614	0.289407	1.48827	0.843838	2.62485	0.001246	0.1696	-1	0	-1	D A11CC Vitamin D and analogues	B	p5yr
A11CC	133	37	366238	26904	1.07237	0.228103	0.504989	0.240115	1.65697	1.03497	2.65278	2.587e-06	0.03546	-1	-1	0	D A11CC Vitamin D and analogues	D	p5yr
A11CC	133	37	24123	2854	0.760528	0.23265	0.30469	0.252994	1.3562	0.825974	2.22681	0.001081	0.2285	-1	0	-1	D A11CC Vitamin D and analogues	H	p5yr
A11DA	160	10	3657	31	1.53977	0.506813	1.07091	0.570039	2.91804	0.954376	8.92202	0.002396	0.06037	-1	0	-1	D A11DA Vitamin B1, plain	B	p1yr
A11DA	160	10	391551	1591	2.13828	0.398843	1.40243	0.428593	4.06509	1.75489	9.41651	8.271e-08	0.001067	-1	-1	0	D A11DA Vitamin B1, plain	D	p1yr
A11DA	1283	35	26666	311	0.695152	0.230429	0.479849	0.241181	1.61583	1.00715	2.59238	0.002557	0.04665	-1	-1	0	D A11DA Vitamin B1, plain	G	p1yr
A11DA	160	10	26666	311	1.71351	0.406006	0.8847	0.472383	2.42226	0.959642	6.11408	2.447e-05	0.0611	-1	0	-1	D A11DA Vitamin B1, plain	H	p1yr
A11DA	160	10	3649	39	1.31382	0.480998	1.38254	0.461919	3.98499	1.61108	9.85686	0.006335	0.00278	-1	-1	0	D A11DA Vitamin B1, plain	A	p2yr
A11DA	160	10	3649	39	1.31382	0.480998	0.461764	0.553439	1.58687	0.536171	4.69656	0.006335	0.4041	-1	0	-1	D A11DA Vitamin B1, plain	B	p2yr
A11DA	1279	39	391276	1866	1.22269	0.208192	0.835092	0.211746	2.30503	1.52208	3.49072	4.285e-09	8.02e-05	-1	-1	0	D A11DA Vitamin B1, plain	C	p2yr
A11DA	160	10	391276	1866	2.01875	0.396047	1.23755	0.422899	3.44714	1.50482	7.89646	3.448e-07	0.00343	-1	-1	0	D A11DA Vitamin B1, plain	D	p2yr
A11DA	1279	39	26617	360	0.662879	0.217349	0.453226	0.224907	1.57338	1.01247	2.44502	0.002292	0.0439	-1	-1	0	D A11DA Vitamin B1, plain	G	p2yr
A11DA	160	10	26617	360	1.54868	0.404696	0.733943	0.471285	2.08328	0.827125	5.24715	0.0001301	0.1194	-1	0	-1	D A11DA Vitamin B1, plain	H	p2yr
A11DA	1274	44	2528	12	1.66179	0.409193	1.42884	0.419722	4.17384	1.83297	9.50424	4.981e-05	0.0006703	-1	-1	0	D A11DA Vitamin B1, plain	A	p5yr
A11DA	157	13	3645	43	1.49533	0.431852	0.942761	0.476748	2.56706	1.00809	6.53692	0.0005409	0.04806	-1	-1	0	D A11DA Vitamin B1, plain	B	p5yr
A11DA	1274	44	390722	2420	1.12408	0.193776	0.766811	0.19674	2.15289	1.46405	3.16583	6.6e-09	9.717e-05	-1	-1	0	D A11DA Vitamin B1, plain	C	p5yr
A11DA	157	13	390722	2420	2.11658	0.350244	1.4061	0.368264	4.08002	1.98241	8.39712	1.513e-09	0.0001345	-1	-1	0	D A11DA Vitamin B1, plain	D	p5yr
A11DA	1274	44	26524	453	0.556315	0.201776	0.365386	0.206953	1.44107	0.960548	2.16198	0.005835	0.07748	-1	0	-1	D A11DA Vitamin B1, plain	G	p5yr
A11DA	157	13	26524	453	1.63903	0.357082	0.968554	0.40037	2.63413	1.20179	5.77362	4.451e-06	0.01556	-1	-1	0	D A11DA Vitamin B1, plain	H	p5yr
A11DA	1289	29	2534	6	1.9398	0.595932	1.67752	0.616259	5.35225	1.59886	17.9169	0.001143	0.006516	-1	-1	0	D A11DA Vitamin B1, plain	A	p6m
A11DA	1289	29	26709	268	0.685458	0.252011	0.505241	0.263848	1.65738	0.988156	2.77985	0.006533	0.05552	-1	0	-1	D A11DA Vitamin B1, plain	G	p6m
A12AX	131	39	3296	392	0.613749	0.2459	-0.154729	0.3169	0.856647	0.460226	1.59453	0.0126	0.6254	-1	0	-1	D A12AX Calcium, combinations with vitamin D and/or other drugs	B	p2yr
A12AX	131	39	23057	3920	0.558243	0.223713	0.0782627	0.261294	1.08141	0.647985	1.80473	0.01259	0.7645	-1	0	-1	D A12AX Calcium, combinations with vitamin D and/or other drugs	H	p2yr
A12AX	119	51	3153	535	0.676301	0.231584	0.0481013	0.28291	1.04928	0.60256	1.82717	0.003517	0.865	-1	0	-1	D A12AX Calcium, combinations with vitamin D and/or other drugs	B	p5yr
A12AX	119	51	340775	52367	0.799367	0.209228	0.274305	0.21758	1.31562	0.858863	2.01528	0.0001332	0.2074	-1	0	-1	D A12AX Calcium, combinations with vitamin D and/or other drugs	D	p5yr
A12AX	119	51	21924	5053	0.607834	0.208302	0.153257	0.24363	1.16562	0.723055	1.87908	0.003525	0.5293	-1	0	-1	D A12AX Calcium, combinations with vitamin D and/or other drugs	H	p5yr
B01AA	151	19	3582	106	0.731777	0.367751	0.668174	0.39297	1.95067	0.902779	4.2149	0.04668	0.08915	-1	0	-1	D B01AA Vitamin K antagonists	B	p5yr
B01AF	1171	147	2410	130	0.350397	0.155408	0.234721	0.169023	1.26456	0.907862	1.76139	0.02421	0.165	-1	0	-1	D B01AF Direct factor Xa inhibitors	A	p5yr
B03AA	1219	99	2487	53	0.796004	0.218143	0.752794	0.238835	2.12292	1.32915	3.39075	0.0002668	0.001635	-1	-1	0	D B03AA Iron bivalent, oral preparations	A	p1yr
B03AA	150	20	3556	132	0.75581	0.354243	0.295409	0.391167	1.34368	0.62406	2.89309	0.03294	0.4502	-1	0	-1	D B03AA Iron bivalent, oral preparations	B	p1yr
B03AA	143	27	3481	207	0.666892	0.30938	0.469693	0.181972	1.5995	1.11954	2.28522	0.03118	0.009885	-1	-1	0	D B03AA Iron bivalent, oral preparations	A	p2yr
B03AA	143	27	3481	207	0.666892	0.30938	0.454941	0.336723	1.57608	0.814457	3.04992	0.03118	0.1767	-1	0	-1	D B03AA Iron bivalent, oral preparations	B	p2yr
B03AA	1240	78	2507	33	0.959461	0.271075	0.668752	0.2982	1.9518	1.08774	3.50222	0.0004057	0.02498	-1	-1	0	D B03AA Iron bivalent, oral preparations	A	p6m
B03AA	152	18	3595	93	1.10036	0.38213	0.377577	0.439222	1.45875	0.616587	3.45116	0.004005	0.39	-1	0	-1	D B03AA Iron bivalent, oral preparations	B	p6m
B03BB	147	23	3543	145	0.759897	0.325279	0.240534	0.367289	1.27193	0.619051	2.61336	0.01954	0.5126	-1	0	-1	D B03BB Folic acid and derivatives	B	p1yr
C10AA	854	464	255620	137522	-0.716256	0.0756799	-0.59558	0.0775355	0.551243	0.473527	0.641714	2.971e-21	1.577e-14	1	1		D C10AA HMG CoA reductase inhibitors [DG:DG01660]	C	p1yr
C09AA	1098	220	331703	61439	-0.488408	0.0931624	-0.42849	0.0989524	0.651492	0.536637	0.79093	1.585e-07	1.49e-05	1	1		D C09AA ACE inhibitors, plain [DG:DG01501]	C	p1yr
H03AA	1234	84	359009	34133	-0.482573	0.128709	-0.499975	0.129356	0.606546	0.470712	0.781577	0.0001773	0.0001111	1	1		D H03AA Thyroid hormones	C	p1yr
C09CA	1195	123	358901	34241	-0.391624	0.11629	-0.455068	0.121959	0.634405	0.499521	0.80571	0.0007582	0.0001905	1	1		D C09CA Angiotensin II receptor blockers, plain [DG:DG01495]	C	p1yr
C08CA	1066	252	327494	65648	-0.278899	0.086789	-0.128063	0.0883345	0.879798	0.739933	1.0461	0.001311	0.1471	1	0		D C08CA Dihydropyridine derivatives [DG:DG01928]	C	p1yr
A10BA	1178	140	369828	23314	-0.400572	0.139206	-0.0815312	0.141948	0.921704	0.697855	1.21736	0.004008	0.5657	1	0		D A10BA Biguanides [DG:DG01684]	C	p1yr
S01EE	1295	23	384759	8383	-0.600112	0.265697	-0.568191	0.269371	0.56655	0.334155	0.960567	0.02391	0.03492	1	1		D S01EE Prostaglandin analogues	C	p1yr
S01ED	1308	10	388022	5120	-0.853004	0.390861	-0.681605	0.394755	0.505805	0.233327	1.09648	0.02908	0.08423	1	0		D S01ED Beta blocking agents	C	p1yr
R03BA	1278	40	378273	14869	-0.389094	0.185742	-0.476997	0.187326	0.620644	0.429922	0.895974	0.03619	0.01089	1	1		D R03BA Glucocorticoids	C	p1yr
A10BJ	1309	9	391309	1833	-1.07885	0.518366	-0.903824	0.521269	0.405018	0.145803	1.12507	0.03741	0.08294	1	0		D A10BJ Glucagon-like peptide-1 receptor (GLP-1) analogues	C	p1yr
B03BB	147	23	384571	8571	1.29407	0.279548	0.552997	0.298521	1.73846	0.968414	3.1208	3.672e-06	0.06396	-1	0	-1	D B03BB Folic acid and derivatives	D	p1yr
B03BB	1223	95	25791	1186	0.324446	0.142452	0.189911	0.148216	1.20914	0.904295	1.61676	0.02276	0.2001	-1	0	-1	D B03BB Folic acid and derivatives	G	p1yr
B03BB	147	23	25791	1186	0.963958	0.285511	0.494092	0.315327	1.63901	0.883412	3.04088	0.0007358	0.1171	-1	0	-1	D B03BB Folic acid and derivatives	H	p1yr
B03BB	145	25	381132	12010	1.02521	0.270135	0.316383	0.290617	1.37216	0.776299	2.42537	0.0001476	0.2763	-1	0	-1	D B03BB Folic acid and derivatives	D	p2yr
B03BB	1196	122	25391	1586	0.29915	0.12636	0.177472	0.131298	1.19419	0.923228	1.54469	0.01792	0.1765	-1	0	-1	D B03BB Folic acid and derivatives	G	p2yr
B03BB	145	25	25391	1586	0.717756	0.273711	0.282433	0.300678	1.32635	0.735716	2.39116	0.008738	0.3476	-1	0	-1	D B03BB Folic acid and derivatives	H	p2yr
B03BB	139	31	3405	283	0.597478	0.270206	0.28408	0.302078	1.32854	0.73479	2.40207	0.02708	0.3471	-1	0	-1	D B03BB Folic acid and derivatives	B	p5yr
B03BB	1154	164	375419	17723	0.571662	0.105028	0.279121	0.107843	1.32197	1.0701	1.63312	5.243e-08	0.009647	-1	-1	0	D B03BB Folic acid and derivatives	C	p5yr
B03BB	139	31	375419	17723	1.0233	0.23993	0.325991	0.255723	1.3854	0.839274	2.28691	1.999e-05	0.2024	-1	0	-1	D B03BB Folic acid and derivatives	D	p5yr
B03BB	1154	164	24869	2108	0.35172	0.108561	0.246728	0.112501	1.27983	1.02657	1.59558	0.001197	0.02831	-1	-1	0	D B03BB Folic acid and derivatives	G	p5yr
B03BB	139	31	24869	2108	0.778667	0.243503	0.341962	0.266604	1.40771	0.834773	2.37387	0.001387	0.1996	-1	0	-1	D B03BB Folic acid and derivatives	H	p5yr
B03BB	151	19	26049	928	0.93217	0.316113	0.481947	0.353095	1.61922	0.810474	3.23501	0.003192	0.1723	-1	0	-1	D B03BB Folic acid and derivatives	H	p6m
C10AA	91	79	255620	137522	-0.683237	0.197109	-0.566818	0.202533	0.567328	0.381449	0.843784	0.0005277	0.005132	1	1		D C10AA HMG CoA reductase inhibitors [DG:DG01660]	D	p1yr
C09AA	135	35	331703	61439	-0.55436	0.242455	-0.410218	0.250003	0.663506	0.406482	1.08305	0.02223	0.1008	1	0		D C09AA ACE inhibitors, plain [DG:DG01501]	D	p1yr
C08CA	133	37	327494	65648	-0.462721	0.232403	-0.302723	0.2397	0.738804	0.461845	1.18185	0.04648	0.2066	1	0		D C08CA Dihydropyridine derivatives [DG:DG01928]	D	p1yr
C03CA	1174	144	2462	78	0.705876	0.191326	0.401836	0.213651	1.49457	0.983099	2.27213	0.0002279	0.06007	-1	0	-1	D C03CA Sulfonamides, plain	A	p1yr
C03CA	1174	144	381915	11227	0.73892	0.123783	0.377764	0.128351	1.45902	1.13451	1.87635	2.382e-09	0.003248	-1	-1	0	D C03CA Sulfonamides, plain	C	p1yr
C03CA	1152	166	379149	13993	0.703844	0.115684	0.386245	0.119509	1.47145	1.16417	1.85982	1.172e-09	0.00123	-1	-1	0	D C03CA Sulfonamides, plain	C	p2yr
C03CA	3585	273	379149	13993	0.512048	0.0828129	0.304366	0.0842907	1.35577	1.14931	1.59931	6.288e-10	0.0003052	-1	-1	0	D C03CA Sulfonamides, plain	E	p2yr
C03CA	1152	166	24605	2372	0.248787	0.116571	0.221676	0.123116	1.24817	0.980554	1.58882	0.03284	0.07179	-1	0	-1	D C03CA Sulfonamides, plain	G	p2yr
C03CA	1119	199	2392	148	0.440052	0.151972	0.185474	0.166435	1.20379	0.868632	1.66826	0.003806	0.2652	-1	0	-1	D C03CA Sulfonamides, plain	A	p5yr
C03CA	1119	199	373335	19807	0.565413	0.10663	0.326634	0.109106	1.38629	1.1194	1.71683	1.143e-07	0.002756	-1	-1	0	D C03CA Sulfonamides, plain	C	p5yr
C07AB	130	40	3330	358	0.575424	0.254848	0.455116	0.276837	1.57636	0.916084	2.71253	0.02401	0.1003	-1	0	-1	D C07AB Beta blocking agents, selective	B	p6m
D01AC	3640	218	380909	12233	0.480958	0.0764264	0.281507	0.0778207	1.32513	1.13767	1.54347	3.115e-10	0.0002976	-1	-1	0	D D01AC Imidazole and triazole derivatives	E	p1yr
D01AC	3743	115	389431	3711	1.01717	0.106549	0.585884	0.111451	1.79658	1.44404	2.23519	1.349e-21	1.466e-07	-1	-1	0	D D01AC Imidazole and triazole derivatives	E	p6m
D01BA	3827	31	26860	117	0.678732	0.201337	0.688652	0.202893	1.99103	1.33773	2.96338	0.0007495	0.0006893	-1	-1	0	D D01BA Antifungals for systemic use	F	p1yr
D01BA	1306	12	26860	117	0.875923	0.299447	0.830211	0.303561	2.2938	1.26518	4.15871	0.003446	0.006244	-1	-1	0	D D01BA Antifungals for systemic use	G	p1yr
D01BA	3799	59	26730	247	0.560761	0.144881	0.585282	0.146036	1.7955	1.34857	2.39054	0.0001088	6.143e-05	-1	-1	0	D D01BA Antifungals for systemic use	F	p2yr
D01BA	1298	20	26730	247	0.632766	0.232552	0.682089	0.234942	1.978	1.24806	3.13486	0.006513	0.003696	-1	-1	0	D D01BA Antifungals for systemic use	G	p2yr
D01BA	3734	124	26268	709	0.289993	0.0989108	0.300436	0.0995647	1.35045	1.11103	1.64146	0.003372	0.002551	-1	-1	0	D D01BA Antifungals for systemic use	F	p5yr
D02AX	130	40	3373	315	0.687038	0.246615	0.366193	0.269683	1.44223	0.849978	2.44717	0.005365	0.1746	-1	0	-1	D D02AX Other emollients and protectives	B	p1yr
D02AX	130	40	371138	22004	1.07511	0.219117	0.358108	0.238593	1.43062	0.896258	2.28357	9.273e-07	0.1334	-1	0	-1	D D02AX Other emollients and protectives	D	p1yr
D02AX	130	40	24348	2629	0.753962	0.222083	0.27351	0.244678	1.31457	0.813775	2.12356	0.0006874	0.2636	-1	0	-1	D D02AX Other emollients and protectives	H	p1yr
D02AX	122	48	3212	476	0.493426	0.231044	-0.0520389	0.264786	0.949292	0.564862	1.59536	0.03277	0.8442	-1	0	-1	D D02AX Other emollients and protectives	B	p2yr
C09AA	3270	588	331703	61439	-0.230727	0.0531087	-0.218356	0.0557991	0.803839	0.720564	0.896738	1.397e-05	9.108e-05	1	1		D C09AA ACE inhibitors, plain [DG:DG01501]	E	p1yr
C10AA	2600	1258	255620	137522	-0.180994	0.0420699	-0.154192	0.0427256	0.857107	0.788256	0.931973	1.691e-05	0.0003075	1	1		D C10AA HMG CoA reductase inhibitors [DG:DG01660]	E	p1yr
H03AA	3587	271	359009	34133	-0.217739	0.0658626	-0.225068	0.0660509	0.798462	0.701506	0.908818	0.0009466	0.0006557	1	1		D H03AA Thyroid hormones	E	p1yr
A10AE	3821	37	390087	3055	-0.528652	0.230525	-0.502066	0.231498	0.605279	0.384506	0.952813	0.02183	0.0301	1	1		D A10AE Insulins and analogues for injection, long-acting	E	p1yr
C09CA	3533	325	358901	34241	-0.142405	0.0671113	-0.195343	0.0699292	0.822553	0.717199	0.943382	0.03384	0.005215	1	1		D C09CA Angiotensin II receptor blockers, plain [DG:DG01495]	E	p1yr
D02AX	122	48	356958	36184	0.765216	0.208673	0.130063	0.229216	1.1389	0.726736	1.78482	0.0002454	0.5704	-1	0	-1	D D02AX Other emollients and protectives	D	p2yr
D02AX	3334	524	356958	36184	0.310082	0.0526452	0.0999681	0.054464	1.10514	0.993243	1.22963	3.864e-09	0.06643	-1	0	-1	D D02AX Other emollients and protectives	E	p2yr
D02AX	122	48	23080	3897	0.490361	0.211453	-0.00570575	0.236544	0.99431	0.625412	1.5808	0.0204	0.9808	-1	0	-1	D D02AX Other emollients and protectives	H	p2yr
D02AX	138	32	3493	195	0.926252	0.268203	0.453634	0.306437	1.57402	0.863154	2.87034	0.0005593	0.1389	-1	0	-1	D D02AX Other emollients and protectives	B	p6m
D02AX	1197	121	383910	9232	0.951614	0.118501	0.27529	0.129593	1.31691	1.02152	1.69772	9.737e-16	0.03365	-1	-1	0	D D02AX Other emollients and protectives	C	p6m
D02AX	138	32	383910	9232	1.73042	0.236417	0.594966	0.282618	1.81297	1.0419	3.15469	2.496e-13	0.03528	-1	-1	0	D D02AX Other emollients and protectives	D	p6m
D02AX	3631	227	383910	9232	0.806799	0.0791994	0.339012	0.0841649	1.40356	1.19012	1.65528	2.284e-24	5.628e-05	-1	-1	0	D D02AX Other emollients and protectives	E	p6m
J07BB	3629	229	23649	3328	-0.664476	0.0747113	-0.499139	0.0655094	0.607053	0.533903	0.690224	6.214e-19	2.622e-14	1	1		D J07BB Influenza vaccines	F	p1yr
A02BC	2610	1248	15851	11126	-0.26503	0.0395101	-0.218769	0.0419426	0.803508	0.740094	0.872354	2.008e-11	1.841e-07	1	1		D A02BC Proton pump inhibitors [DG:DG01646]	F	p1yr
G03CA	3679	179	25257	1720	-0.397705	0.0784991	-0.34978	0.0789439	0.704843	0.6038	0.822796	4.078e-07	9.423e-06	1	1		D G03CA Natural and semisynthetic estrogens, plain	F	p1yr
N03AX	3593	265	24621	2356	-0.3512	0.0794964	-0.322608	0.0817356	0.724258	0.617045	0.850099	1e-05	7.932e-05	1	1		D N03AX Other antiepileptics	F	p1yr
N02AX	3753	105	25926	1051	-0.465822	0.123557	-0.367935	0.125458	0.692162	0.54127	0.88512	0.0001635	0.003362	1	1		D N02AX Other opioids	F	p1yr
J01MA	3821	37	26450	527	-0.709829	0.193237	-0.708102	0.194852	0.492578	0.33621	0.721672	0.0002398	0.0002795	1	1		D J01MA Fluoroquinolones [DG:DG01549]	F	p1yr
C05AX	3805	53	26390	587	-0.582456	0.159032	-0.534274	0.159896	0.586095	0.428409	0.80182	0.0002502	0.0008346	1	1		D C05AX Other agents for treatment of hemorrhoids and anal fissures for topical use	F	p1yr
R05DA	3668	190	25218	1759	-0.30051	0.086928	-0.272922	0.088699	0.761152	0.639687	0.905681	0.000547	0.002093	1	1		D R05DA Opium alkaloids and derivatives	F	p1yr
M01AE	3600	258	24862	2115	-0.230299	0.0676519	-0.0747196	0.0712515	0.928004	0.807045	1.06709	0.0006645	0.2943	1	0		D M01AE Propionic acid derivatives	F	p1yr
C07AB	3406	452	22562	4415	-0.222498	0.0660707	-0.20117	0.0667438	0.817773	0.717494	0.932068	0.0007592	0.00258	1	1		D C07AB Beta blocking agents, selective	F	p1yr
D02AX	138	32	25362	1615	1.04365	0.239038	0.403162	0.270066	1.49655	0.881456	2.54087	1.27e-05	0.1355	-1	0	-1	D D02AX Other emollients and protectives	H	p6m
D06BA	3835	23	26880	97	0.631359	0.26793	0.620492	0.27069	1.85984	1.0941	3.16153	0.01846	0.0219	-1	-1	0	D D06BA Sulfonamides	F	p5yr
D07AA	153	17	3556	132	0.845184	0.349116	0.631531	0.403976	1.88049	0.851719	4.15188	0.01553	0.1181	-1	0	-1	D D07AA Corticosteroids, weak (group I)	B	p2yr
D07AA	153	17	25819	1158	0.77795	0.308529	0.597935	0.349161	1.81836	0.917191	3.60495	0.01169	0.08682	-1	0	-1	D D07AA Corticosteroids, weak (group I)	H	p2yr
D07AA	141	29	3340	348	0.536303	0.258269	0.224226	0.290524	1.25135	0.707958	2.21184	0.03791	0.4403	-1	0	-1	D D07AA Corticosteroids, weak (group I)	B	p5yr
C10AA	854	464	16421	10556	-0.465819	0.0745245	-0.330431	0.0780864	0.718614	0.616631	0.837463	4.149e-10	2.328e-05	1	1		D C10AA HMG CoA reductase inhibitors [DG:DG01660]	G	p1yr
A02BC	862	456	15851	11126	-0.412951	0.0683675	-0.473803	0.0716665	0.62263	0.541034	0.716531	1.559e-09	3.88e-11	1	1		D A02BC Proton pump inhibitors [DG:DG01646]	G	p1yr
J07BB	1211	107	23649	3328	-0.455315	0.11404	-0.48707	0.106645	0.614424	0.498526	0.757266	6.552e-05	4.963e-06	1	1		D J07BB Influenza vaccines	G	p1yr
C09AA	1098	220	22100	4877	-0.342168	0.0941613	-0.263631	0.100229	0.768257	0.63123	0.935028	0.0002797	0.008535	1	1		D C09AA ACE inhibitors, plain [DG:DG01501]	G	p1yr
H03AA	1234	84	24401	2576	-0.451533	0.130723	-0.433004	0.132374	0.648558	0.500342	0.84068	0.0005529	0.001073	1	1		D H03AA Thyroid hormones	G	p1yr
C09CA	1195	123	23977	3000	-0.367293	0.118531	-0.325302	0.124367	0.722309	0.566053	0.9217	0.001946	0.00891	1	1		D C09CA Angiotensin II receptor blockers, plain [DG:DG01495]	G	p1yr
R03BA	1278	40	25749	1228	-0.487698	0.187835	-0.499409	0.189202	0.606889	0.418845	0.879357	0.009425	0.008306	1	1		D R03BA Glucocorticoids	G	p1yr
S01ED	1308	10	26522	455	-1.01931	0.394876	-0.804107	0.400807	0.447488	0.203985	0.981664	0.009847	0.04484	1	1		D S01ED Beta blocking agents	G	p1yr
C08CA	1066	252	21802	5175	-0.225025	0.0881175	-0.0782609	0.0910173	0.924723	0.773632	1.10532	0.01066	0.3899	1	0		D C08CA Dihydropyridine derivatives [DG:DG01928]	G	p1yr
S01EE	1295	23	26236	741	-0.685195	0.269925	-0.545709	0.274778	0.579431	0.338143	0.992895	0.01114	0.04704	1	1		D S01EE Prostaglandin analogues	G	p1yr
D07AA	141	29	24139	2838	0.559754	0.237891	0.306418	0.25298	1.35855	0.827425	2.2306	0.01863	0.2258	-1	0	-1	D D07AA Corticosteroids, weak (group I)	H	p5yr
D07AB	1284	34	2516	24	1.01243	0.302571	0.715774	0.326259	2.04577	1.07909	3.87844	0.0008275	0.0283	-1	-1	0	D D07AB Corticosteroids, moderately potent (group II)	A	p1yr
D07AB	1300	18	2532	8	1.73484	0.477592	1.23874	0.519556	3.45125	1.2462	9.55793	0.0002844	0.01716	-1	-1	0	D D07AB Corticosteroids, moderately potent (group II)	A	p6m
D07BC	1294	24	2524	16	0.834366	0.347785	0.772301	0.360266	2.16474	1.06819	4.38694	0.01648	0.03212	-1	-1	0	D D07BC Corticosteroids, potent, combinations with antiseptics	A	p5yr
D07BC	1294	24	26717	260	0.593104	0.246335	0.506505	0.251538	1.65948	1.01357	2.71701	0.01606	0.04406	-1	-1	0	D D07BC Corticosteroids, potent, combinations with antiseptics	G	p5yr
D09AA	3833	25	26856	121	0.570747	0.268036	0.527819	0.271028	1.69523	0.996599	2.88362	0.03323	0.05149	-1	0	-1	D D09AA Medicated dressings with antiinfectives	F	p1yr
D09AA	1304	14	26856	121	0.807585	0.349843	0.413287	0.365812	1.51178	0.738066	3.09657	0.02098	0.2586	-1	0	-1	D D09AA Medicated dressings with antiinfectives	G	p1yr
D09AA	3814	44	26738	239	0.445377	0.202548	0.418654	0.204228	1.51992	1.01853	2.26812	0.02789	0.04038	-1	-1	0	D D09AA Medicated dressings with antiinfectives	F	p2yr
D09AA	1291	27	26738	239	0.617252	0.273873	0.352167	0.280582	1.42215	0.820544	2.46483	0.02422	0.2094	-1	0	-1	D D09AA Medicated dressings with antiinfectives	G	p2yr
D09AA	156	14	389618	3524	1.40185	0.359596	0.767294	0.381619	2.15393	1.01952	4.55059	9.685e-05	0.04437	-1	-1	0	D D09AA Medicated dressings with antiinfectives	D	p5yr
D09AA	156	14	26477	500	1.0256	0.370387	0.578697	0.40491	1.78371	0.806584	3.94458	0.005627	0.153	-1	0	-1	D D09AA Medicated dressings with antiinfectives	H	p5yr
G04BE	1187	131	2388	152	0.356141	0.143487	0.442463	0.149425	1.55654	1.16126	2.08636	0.01311	0.003084	-1	-1	0	D G04BE Drugs used in erectile dysfunction	A	p5yr
H02AB	1140	178	2396	144	0.722097	0.140824	0.691259	0.158405	1.99623	1.4633	2.72325	3.079e-07	1.312e-05	-1	-1	0	D H02AB Glucocorticoids	A	p1yr
H02AB	140	30	3396	292	0.743742	0.281617	0.423281	0.319119	1.52696	0.816785	2.85463	0.0083	0.1848	-1	0	-1	D H02AB Glucocorticoids	B	p1yr
H02AB	1140	178	372897	20245	0.815052	0.0987316	0.294413	0.109062	1.34234	1.084	1.66225	1.521e-16	0.006945	-1	-1	0	D H02AB Glucocorticoids	C	p1yr
H02AB	140	30	372897	20245	1.04688	0.25579	0.197246	0.284024	1.21804	0.698072	2.12533	4.264e-05	0.4874	-1	0	-1	D H02AB Glucocorticoids	D	p1yr
H02AB	3536	322	372897	20245	0.424107	0.0670248	0.0986622	0.0712681	1.10369	0.959809	1.26915	2.492e-10	0.1662	-1	0	-1	D H02AB Glucocorticoids	E	p1yr
H02AB	1140	178	24171	2806	0.323913	0.100624	0.241597	0.108303	1.27328	1.02975	1.5744	0.001288	0.02571	-1	-1	0	D H02AB Glucocorticoids	G	p1yr
J07BB	162	8	23649	3328	-1.17924	0.410212	-1.37729	0.412352	0.252261	0.112419	0.566058	0.004047	0.0008387	1	1		D J07BB Influenza vaccines	H	p1yr
H02AB	132	38	3246	442	0.534628	0.25761	0.633277	0.131573	1.88377	1.45545	2.43815	0.03802	1.544e-06	-1	-1	0	D H02AB Glucocorticoids	A	p2yr
H02AB	132	38	3246	442	0.534628	0.25761	0.479334	0.28469	1.615	0.924202	2.82213	0.03802	0.09232	-1	0	-1	D H02AB Glucocorticoids	B	p2yr
H02AB	1077	241	358027	35115	0.606766	0.0863816	0.338177	0.0929341	1.40239	1.16886	1.68257	2.156e-12	0.0002738	-1	-1	0	D H02AB Glucocorticoids	C	p2yr
H02AB	1077	241	22832	4145	0.228128	0.0880327	0.194984	0.0935608	1.21529	1.01167	1.4599	0.009563	0.03717	-1	-1	0	D H02AB Glucocorticoids	G	p2yr
H02AB	964	354	2120	420	0.4024	0.0990067	0.407456	0.105843	1.50299	1.22133	1.8496	4.913e-05	0.0001202	-1	-1	0	D H02AB Glucocorticoids	A	p5yr
H02AB	964	354	330017	63125	0.414049	0.0748473	0.201108	0.0795556	1.22276	1.04622	1.42908	3.17e-08	0.01148	-1	-1	0	D H02AB Glucocorticoids	C	p5yr
H02AB	1196	122	2474	66	1.17374	0.185581	0.759404	0.20579	2.137	1.42751	3.19911	2.829e-10	0.0002272	-1	-1	0	D H02AB Glucocorticoids	A	p6m
H02AB	144	26	3526	162	1.2396	0.30759	0.846599	0.350826	2.3317	1.17207	4.63865	5.685e-05	0.01586	-1	-1	0	D H02AB Glucocorticoids	B	p6m
H02AB	1196	122	386491	6651	1.57099	0.1145	0.601729	0.133777	1.82527	1.40429	2.37246	7.837e-43	6.861e-06	-1	-1	0	D H02AB Glucocorticoids	C	p6m
H02AB	144	26	386491	6651	1.9961	0.263353	0.785407	0.308947	2.1933	1.19707	4.0186	3.475e-14	0.01102	-1	-1	0	D H02AB Glucocorticoids	D	p6m
H02AB	3670	188	386491	6651	1.03882	0.0867499	0.312943	0.0965023	1.36744	1.13179	1.65216	4.872e-33	0.001183	-1	-1	0	D H02AB Glucocorticoids	E	p6m
H02AB	1196	122	25408	1569	0.561821	0.117992	0.302591	0.128601	1.35336	1.05183	1.74134	1.931e-06	0.01863	-1	-1	0	D H02AB Glucocorticoids	G	p6m
H02AB	144	26	25408	1569	1.09247	0.270453	0.302308	0.304406	1.35298	0.745021	2.45705	5.373e-05	0.3207	-1	0	-1	D H02AB Glucocorticoids	H	p6m
J01AA	1159	159	2391	149	0.55485	0.13708	0.315021	0.150779	1.37029	1.0196	1.8416	5.276e-05	0.03675	-1	-1	0	D J01AA Tetracyclines [DG:DG01197]	A	p1yr
J01AA	1159	159	376970	16172	0.915709	0.100013	0.502192	0.108113	1.65234	1.33682	2.04233	5.417e-20	3.401e-06	-1	-1	0	D J01AA Tetracyclines [DG:DG01197]	C	p1yr
J01AA	146	24	376970	16172	1.08841	0.265785	0.582925	0.286823	1.79127	1.02098	3.14272	4.221e-05	0.04212	-1	-1	0	D J01AA Tetracyclines [DG:DG01197]	D	p1yr
J01AA	3550	308	376970	16172	0.619056	0.0652512	0.399753	0.0682103	1.49146	1.30482	1.70479	2.384e-21	4.616e-09	-1	-1	0	D J01AA Tetracyclines [DG:DG01197]	E	p1yr
J01AA	1159	159	24705	2272	0.424752	0.10288	0.310486	0.108311	1.36409	1.10317	1.68671	3.66e-05	0.004152	-1	-1	0	D J01AA Tetracyclines [DG:DG01197]	G	p1yr
J01AA	1103	215	363117	30025	0.591243	0.0883519	0.306892	0.0935865	1.35919	1.13141	1.63284	2.206e-11	0.001041	-1	-1	0	D J01AA Tetracyclines [DG:DG01197]	C	p2yr
J01AA	3394	464	363117	30025	0.409663	0.0541834	0.243685	0.0555403	1.27594	1.14434	1.42268	4.019e-14	1.147e-05	-1	-1	0	D J01AA Tetracyclines [DG:DG01197]	E	p2yr
J01AA	1103	215	23416	3561	0.224811	0.0907423	0.155303	0.0953948	1.16801	0.968821	1.40816	0.01324	0.1035	-1	0	-1	D J01AA Tetracyclines [DG:DG01197]	G	p2yr
J01AA	989	329	334097	59045	0.39535	0.0737625	0.15019	0.0790685	1.16206	0.99523	1.35684	8.337e-08	0.0575	-1	0	-1	D J01AA Tetracyclines [DG:DG01197]	C	p5yr
J01AA	3065	793	334097	59045	0.293467	0.0428496	0.160149	0.0439919	1.17369	1.07673	1.27938	7.46e-12	0.0002722	-1	-1	0	D J01AA Tetracyclines [DG:DG01197]	E	p5yr
J01AA	1198	120	2475	65	1.12842	0.175473	0.712664	0.192745	2.03942	1.39762	2.97593	1.426e-10	0.0002208	-1	-1	0	D J01AA Tetracyclines [DG:DG01197]	A	p6m
J01AA	148	22	3525	163	1.0634	0.301983	0.626489	0.346997	1.87103	0.947594	3.69436	0.0004343	0.07108	-1	0	-1	D J01AA Tetracyclines [DG:DG01197]	B	p6m
J01AA	1198	120	389325	3817	2.12686	0.113012	1.28217	0.129498	3.60444	2.79646	4.64587	5.635e-79	4.144e-23	-1	-1	0	D J01AA Tetracyclines [DG:DG01197]	C	p6m
J01AA	148	22	389325	3817	2.58855	0.271123	1.4777	0.321796	4.38284	2.33261	8.23512	1.336e-21	4.391e-06	-1	-1	0	D J01AA Tetracyclines [DG:DG01197]	D	p6m
J01AA	3673	185	389325	3817	1.5484	0.0844652	0.976808	0.0921491	2.65596	2.2171	3.1817	4.959e-75	2.995e-26	-1	-1	0	D J01AA Tetracyclines [DG:DG01197]	E	p6m
J01AA	3673	185	25851	1126	0.268744	0.09114	0.246069	0.0931314	1.27899	1.06559	1.53512	0.003194	0.008242	-1	-1	0	D J01AA Tetracyclines [DG:DG01197]	F	p6m
J01AA	1198	120	25851	1126	0.882467	0.117155	0.628875	0.125534	1.8755	1.46642	2.3987	5.127e-14	5.487e-07	-1	-1	0	D J01AA Tetracyclines [DG:DG01197]	G	p6m
J07BB	160	10	3324	364	-0.916821	0.376844	-0.998962	0.392441	0.368262	0.17061	0.794893	0.01502	0.01095	1	1		D J07BB Influenza vaccines	B	p2yr
R01AD	160	10	3282	406	-0.95479	0.422822	-0.845074	0.436976	0.429525	0.182354	1.01172	0.02399	0.0532	1	0		D R01AD Corticosteroids	B	p2yr
J01AA	148	22	25851	1126	1.41188	0.273288	0.890704	0.307436	2.43685	1.33391	4.45174	2.405e-07	0.003768	-1	-1	0	D J01AA Tetracyclines [DG:DG01197]	H	p6m
J01CA	1064	254	2268	272	0.441149	0.108763	0.180447	0.121747	1.19775	0.943415	1.52066	5.09e-05	0.1384	-1	0	-1	D J01CA Penicillins with extended spectrum [DG:DG01780]	A	p1yr
J01CA	1064	254	366276	26866	0.974794	0.0799004	0.616907	0.0863045	1.85319	1.56479	2.19474	3.148e-34	8.819e-13	-1	-1	0	D J01CA Penicillins with extended spectrum [DG:DG01780]	C	p1yr
J01CA	128	42	366276	26866	1.28365	0.20964	0.558891	0.230685	1.74873	1.11266	2.74842	9.184e-10	0.0154	-1	-1	0	D J01CA Penicillins with extended spectrum [DG:DG01780]	D	p1yr
J01CA	3332	526	366276	26866	0.672873	0.0509662	0.479728	0.0537172	1.61564	1.45418	1.79501	8.672e-40	4.254e-19	-1	-1	0	D J01CA Penicillins with extended spectrum [DG:DG01780]	E	p1yr
J01CA	3332	526	23451	3526	0.158789	0.055197	0.183806	0.0560782	1.20178	1.07669	1.34141	0.004021	0.001048	-1	-1	0	D J01CA Penicillins with extended spectrum [DG:DG01780]	F	p1yr
J01CA	1064	254	23451	3526	0.454077	0.0823269	0.351336	0.0866538	1.42097	1.199	1.68402	3.507e-08	5.038e-05	-1	-1	0	D J01CA Penicillins with extended spectrum [DG:DG01780]	G	p1yr
J01CA	128	42	23451	3526	0.726652	0.211761	0.383115	0.229736	1.46685	0.935028	2.30115	0.0006012	0.0954	-1	0	-1	D J01CA Penicillins with extended spectrum [DG:DG01780]	H	p1yr
J01CA	956	362	336972	56170	0.56972	0.0705982	0.315068	0.0753652	1.37035	1.18217	1.58849	7.055e-16	2.909e-05	-1	-1	0	D J01CA Penicillins with extended spectrum [DG:DG01780]	C	p2yr
J01CA	2998	860	336972	56170	0.468102	0.0412145	0.33201	0.0426806	1.39377	1.28192	1.51537	6.864e-30	7.332e-15	-1	-1	0	D J01CA Penicillins with extended spectrum [DG:DG01780]	E	p2yr
J01CA	2998	860	20958	6019	0.101566	0.0446181	0.148879	0.045309	1.16053	1.06191	1.26831	0.02283	0.001018	-1	-1	0	D J01CA Penicillins with extended spectrum [DG:DG01780]	F	p2yr
J01CA	956	362	20958	6019	0.203313	0.0725006	0.160821	0.0759238	1.17447	1.01208	1.36293	0.005046	0.03417	-1	-1	0	D J01CA Penicillins with extended spectrum [DG:DG01780]	G	p2yr
J01CA	722	596	273395	119747	0.395044	0.0613	0.235118	0.0641799	1.26506	1.11553	1.43463	1.162e-10	0.0002489	-1	-1	0	D J01CA Penicillins with extended spectrum [DG:DG01780]	C	p5yr
J01CA	2323	1535	273395	119747	0.356332	0.0339368	0.254077	0.0352337	1.28927	1.20324	1.38145	8.717e-26	5.556e-13	-1	-1	0	D J01CA Penicillins with extended spectrum [DG:DG01780]	E	p5yr
J01CA	2323	1535	16107	10870	0.102991	0.0368076	0.156728	0.0378102	1.16968	1.08613	1.25966	0.005144	3.405e-05	-1	-1	0	D J01CA Penicillins with extended spectrum [DG:DG01780]	F	p5yr
J01CA	722	596	16107	10870	0.139405	0.0628429	0.162945	0.0643772	1.17697	1.03745	1.33526	0.02654	0.01138	-1	-1	0	D J01CA Penicillins with extended spectrum [DG:DG01780]	G	p5yr
J01CA	1161	157	2445	95	1.19073	0.150941	0.764198	0.166851	2.14727	1.54817	2.97821	3.952e-15	4.796e-06	-1	-1	0	D J01CA Penicillins with extended spectrum [DG:DG01780]	A	p6m
J01CA	136	34	3470	218	1.16345	0.255697	0.49962	0.301981	1.64809	0.911705	2.97927	5.528e-06	0.09811	-1	0	-1	D J01CA Penicillins with extended spectrum [DG:DG01780]	B	p6m
J01CA	1161	157	388974	4168	2.45998	0.0963779	1.6588	0.110192	5.25301	4.23265	6.51935	1.389e-143	3.371e-51	-1	-1	0	D J01CA Penicillins with extended spectrum [DG:DG01780]	C	p6m
J01CA	136	34	388974	4168	2.99622	0.223651	1.76405	0.268976	5.83602	3.44479	9.88714	6.44e-41	5.446e-11	-1	-1	0	D J01CA Penicillins with extended spectrum [DG:DG01780]	D	p6m
J01CA	3606	252	388974	4168	1.85799	0.0726458	1.31336	0.0795626	3.71864	3.18171	4.34618	3.699e-144	3.412e-61	-1	-1	0	D J01CA Penicillins with extended spectrum [DG:DG01780]	E	p6m
J01CA	3606	252	25554	1423	0.351807	0.077925	0.309844	0.0798871	1.36321	1.16563	1.59429	6.364e-06	0.0001053	-1	-1	0	D J01CA Penicillins with extended spectrum [DG:DG01780]	F	p6m
J01CA	1161	157	25554	1423	0.975826	0.0996655	0.740769	0.105979	2.09755	1.70411	2.58182	1.337e-22	2.815e-12	-1	-1	0	D J01CA Penicillins with extended spectrum [DG:DG01780]	G	p6m
J01CA	136	34	25554	1423	1.53667	0.22699	1.15066	0.250081	3.16027	1.93573	5.15944	1.316e-11	4.221e-06	-1	-1	0	D J01CA Penicillins with extended spectrum [DG:DG01780]	H	p6m
J01CF	1180	138	2409	131	0.466162	0.146779	0.26462	0.16076	1.30294	0.950694	1.78569	0.001505	0.09983	-1	0	-1	D J01CF Beta-lactamase resistant penicillins [DG:DG01779]	A	p1yr
C10AA	821	497	249370	143772	-0.70364	0.0750709	-0.629012	0.0767675	0.533118	0.458647	0.619681	7.085e-21	2.54e-16	1	1		D C10AA HMG CoA reductase inhibitors [DG:DG01660]	C	p2yr
C09AA	1074	244	327125	66017	-0.461719	0.0899305	-0.409431	0.0955869	0.664028	0.550582	0.800848	2.835e-07	1.842e-05	1	1		D C09AA ACE inhibitors, plain [DG:DG01501]	C	p2yr
H03AA	1233	85	358601	34541	-0.485569	0.128112	-0.509475	0.12866	0.600811	0.466898	0.773133	0.0001505	7.501e-05	1	1		D H03AA Thyroid hormones	C	p2yr
C08CA	1034	284	321678	71464	-0.246055	0.0836509	-0.109551	0.0852702	0.896236	0.758298	1.05927	0.003267	0.1989	1	0		D C08CA Dihydropyridine derivatives [DG:DG01928]	C	p2yr
C09CA	1177	141	357251	35891	-0.319795	0.111023	-0.389325	0.116623	0.677514	0.539074	0.851508	0.003971	0.000843	1	1		D C09CA Angiotensin II receptor blockers, plain [DG:DG01495]	C	p2yr
A10BA	1165	153	368443	24699	-0.37883	0.137289	-0.122021	0.14029	0.88513	0.672344	1.16526	0.005792	0.3844	1	0		D A10BA Biguanides [DG:DG01684]	C	p2yr
S01EE	1294	24	383778	9364	-0.641363	0.256602	-0.690239	0.258033	0.501456	0.302408	0.831518	0.01244	0.007473	1	1		D S01EE Prostaglandin analogues	C	p2yr
R03BA	1264	54	374491	18651	-0.330699	0.162808	-0.409864	0.163227	0.66374	0.482013	0.913982	0.04223	0.01204	1	1		D R03BA Glucocorticoids	C	p2yr
J01CF	141	29	3448	240	0.592646	0.277878	0.173537	0.314914	1.1895	0.641543	2.2055	0.03301	0.5816	-1	0	-1	D J01CF Beta-lactamase resistant penicillins [DG:DG01779]	B	p1yr
J01CF	1180	138	380509	12633	0.996693	0.104448	0.693908	0.10837	2.00152	1.61851	2.47517	1.402e-21	1.524e-10	-1	-1	0	D J01CF Beta-lactamase resistant penicillins [DG:DG01779]	C	p1yr
J01CF	141	29	380509	12633	1.4752	0.243176	0.951132	0.262575	2.58864	1.54727	4.33088	1.309e-09	0.000292	-1	-1	0	D J01CF Beta-lactamase resistant penicillins [DG:DG01779]	D	p1yr
J01CF	3589	269	380509	12633	0.672526	0.0690514	0.509578	0.0703399	1.66459	1.45022	1.91065	2.057e-22	4.348e-13	-1	-1	0	D J01CF Beta-lactamase resistant penicillins [DG:DG01779]	E	p1yr
J01CF	1180	138	25111	1866	0.361637	0.108274	0.248246	0.112156	1.28178	1.02882	1.59692	0.0008388	0.02688	-1	-1	0	D J01CF Beta-lactamase resistant penicillins [DG:DG01779]	G	p1yr
J01CF	141	29	25111	1866	0.863819	0.248482	0.543459	0.27017	1.72195	1.01401	2.92416	0.000509	0.04428	-1	-1	0	D J01CF Beta-lactamase resistant penicillins [DG:DG01779]	H	p1yr
J01CF	125	45	3283	405	0.674755	0.232014	0.102658	0.127909	1.10811	0.862328	1.42395	0.003655	0.4223	-1	0	-1	D J01CF Beta-lactamase resistant penicillins [DG:DG01779]	A	p2yr
J01CF	125	45	3283	405	0.674755	0.232014	0.33823	0.255927	1.40246	0.849135	2.31636	0.003655	0.1864	-1	0	-1	D J01CF Beta-lactamase resistant penicillins [DG:DG01779]	B	p2yr
J01CF	1105	213	363520	29622	0.584534	0.0864824	0.34624	0.0895989	1.41374	1.18605	1.68515	1.391e-11	0.0001114	-1	-1	0	D J01CF Beta-lactamase resistant penicillins [DG:DG01779]	C	p2yr
J01CF	125	45	363520	29622	1.18995	0.20467	0.794908	0.222438	2.21424	1.43181	3.42424	6.105e-09	0.0003521	-1	-1	0	D J01CF Beta-lactamase resistant penicillins [DG:DG01779]	D	p2yr
J01CF	3408	450	363520	29622	0.356983	0.0537753	0.218493	0.0549209	1.2442	1.11723	1.3856	3.175e-11	6.942e-05	-1	-1	0	D J01CF Beta-lactamase resistant penicillins [DG:DG01779]	E	p2yr
J01CF	125	45	23605	3372	0.801017	0.208619	0.619073	0.225083	1.8572	1.1947	2.88708	0.0001235	0.005956	-1	-1	0	D J01CF Beta-lactamase resistant penicillins [DG:DG01779]	H	p2yr
J01CF	104	66	2886	802	0.531178	0.204512	0.216368	0.22534	1.24156	0.798172	1.93125	0.009432	0.337	-1	0	-1	D J01CF Beta-lactamase resistant penicillins [DG:DG01779]	B	p5yr
J01CF	104	66	322076	71066	0.731932	0.186397	0.409947	0.19711	1.50674	1.0239	2.21727	8.612e-05	0.03755	-1	-1	0	D J01CF Beta-lactamase resistant penicillins [DG:DG01779]	D	p5yr
J01CF	104	66	20214	6763	0.478185	0.189083	0.305638	0.202523	1.35749	0.912728	2.01898	0.01145	0.1313	-1	0	-1	D J01CF Beta-lactamase resistant penicillins [DG:DG01779]	H	p5yr
J01CF	1239	79	2489	51	0.880682	0.215452	0.408945	0.240836	1.50523	0.938723	2.41361	4.448e-05	0.08959	-1	0	-1	D J01CF Beta-lactamase resistant penicillins [DG:DG01779]	A	p6m
J01CF	149	21	3579	109	0.900893	0.343311	0.0822416	0.39903	1.08572	0.49654	2.374	0.008722	0.8367	-1	0	-1	D J01CF Beta-lactamase resistant penicillins [DG:DG01779]	B	p6m
J01CF	1239	79	389139	4003	1.55565	0.136841	0.978076	0.148848	2.65933	1.98643	3.56018	6.077e-30	5.004e-11	-1	-1	0	D J01CF Beta-lactamase resistant penicillins [DG:DG01779]	C	p6m
C10AA	86	84	249370	143772	-0.694608	0.197566	-0.627889	0.205574	0.533718	0.356719	0.79854	0.0004384	0.002256	1	1		D C10AA HMG CoA reductase inhibitors [DG:DG01660]	D	p2yr
J07BB	160	10	342364	50778	-1.05023	0.357483	-1.11651	0.360201	0.327419	0.161622	0.663298	0.003305	0.001937	1	1		D J07BB Influenza vaccines	D	p2yr
C09AA	131	39	327125	66017	-0.528387	0.233934	-0.440437	0.244265	0.643755	0.398842	1.03906	0.0239	0.07137	1	0		D C09AA ACE inhibitors, plain [DG:DG01501]	D	p2yr
R01AD	160	10	354259	38883	-0.819468	0.400261	-0.835897	0.404629	0.433486	0.196134	0.958069	0.04063	0.03884	1	1		D R01AD Corticosteroids	D	p2yr
A10BA	152	18	368443	24699	-0.786474	0.391425	-0.492374	0.400668	0.611174	0.278685	1.34034	0.04451	0.2191	1	0		D A10BA Biguanides [DG:DG01684]	D	p2yr
J01CF	149	21	389139	4003	2.14323	0.290042	1.01708	0.348426	2.76512	1.39679	5.47388	1.478e-13	0.003511	-1	-1	0	D J01CF Beta-lactamase resistant penicillins [DG:DG01779]	D	p6m
J01CF	3728	130	389139	4003	1.0211	0.101904	0.603356	0.1071	1.82824	1.48208	2.25527	1.25e-23	1.766e-08	-1	-1	0	D J01CF Beta-lactamase resistant penicillins [DG:DG01779]	E	p6m
J01CF	1239	79	26064	913	0.503356	0.141979	0.324441	0.146685	1.38326	1.03762	1.84402	0.0003928	0.02699	-1	-1	0	D J01CF Beta-lactamase resistant penicillins [DG:DG01779]	G	p6m
J01CF	149	21	26064	913	1.1161	0.296002	0.56642	0.330722	1.76195	0.921446	3.36912	0.0001632	0.08678	-1	0	-1	D J01CF Beta-lactamase resistant penicillins [DG:DG01779]	H	p6m
J01CR	1245	73	2500	40	1.00644	0.235785	0.575798	0.250466	1.77855	1.08843	2.90623	2.016e-05	0.02156	-1	-1	0	D J01CR Combinations of penicillins, incl. beta-lactamase inhibitors	A	p1yr
J01CR	1245	73	388192	4950	1.24438	0.143368	0.509719	0.152751	1.66482	1.23409	2.2459	3.985e-18	0.0008472	-1	-1	0	D J01CR Combinations of penicillins, incl. beta-lactamase inhibitors	C	p1yr
J01CR	3745	113	388192	4950	0.65555	0.110222	0.233701	0.113613	1.26327	1.01108	1.57835	2.724e-09	0.03969	-1	-1	0	D J01CR Combinations of penicillins, incl. beta-lactamase inhibitors	E	p1yr
J01CR	1245	73	26011	966	0.34919	0.148158	0.14135	0.153225	1.15183	0.853015	1.55532	0.01844	0.3563	-1	0	-1	D J01CR Combinations of penicillins, incl. beta-lactamase inhibitors	G	p1yr
J01CR	1215	103	382425	10717	0.796547	0.122529	0.286097	0.128912	1.33122	1.034	1.71388	7.995e-11	0.02647	-1	-1	0	D J01CR Combinations of penicillins, incl. beta-lactamase inhibitors	C	p2yr
J01CR	150	20	382425	10717	1.21341	0.285754	0.314504	0.315185	1.36958	0.738414	2.54024	2.173e-05	0.3184	-1	0	-1	D J01CR Combinations of penicillins, incl. beta-lactamase inhibitors	D	p2yr
J01CR	1273	45	2521	19	1.32453	0.315527	0.568624	0.342992	1.76583	0.901367	3.45938	2.756e-05	0.09743	-1	0	-1	D J01CR Combinations of penicillins, incl. beta-lactamase inhibitors	A	p6m
J01CR	1273	45	391685	1457	2.01693	0.179697	0.753056	0.202029	2.12348	1.42916	3.15512	3.139e-29	0.0001934	-1	-1	0	D J01CR Combinations of penicillins, incl. beta-lactamase inhibitors	C	p6m
J01CR	160	10	391685	1457	2.47867	0.412339	0.629058	0.495607	1.87584	0.710124	4.95517	1.843e-09	0.2043	-1	0	-1	D J01CR Combinations of penicillins, incl. beta-lactamase inhibitors	D	p6m
J01CR	3794	64	391685	1457	1.344	0.144694	0.531772	0.154571	1.70195	1.25711	2.30418	1.571e-20	0.0005811	-1	-1	0	D J01CR Combinations of penicillins, incl. beta-lactamase inhibitors	E	p6m
J01CR	1273	45	26483	494	0.536314	0.185376	0.184598	0.192471	1.20273	0.824766	1.75391	0.003817	0.3375	-1	0	-1	D J01CR Combinations of penicillins, incl. beta-lactamase inhibitors	G	p6m
J01EA	1275	43	2507	33	0.734252	0.270963	0.315798	0.298604	1.37135	0.763653	2.46265	0.006763	0.2903	-1	0	-1	D J01EA Trimethoprim and derivatives [DG:DG01581]	A	p1yr
J01EA	1116	202	356238	36904	0.482881	0.0868487	0.266213	0.0888888	1.30501	1.09636	1.55338	2.699e-08	0.002745	-1	-1	0	D J01EA Trimethoprim and derivatives [DG:DG01581]	C	p5yr
J01EA	130	40	356238	36904	0.810772	0.221749	0.47521	0.231003	1.60835	1.0227	2.52937	0.000256	0.03967	-1	-1	0	D J01EA Trimethoprim and derivatives [DG:DG01581]	D	p5yr
J01EA	3372	486	356238	36904	0.320254	0.0519955	0.185054	0.052887	1.20328	1.0848	1.33471	7.316e-10	0.000467	-1	-1	0	D J01EA Trimethoprim and derivatives [DG:DG01581]	E	p5yr
J01FA	1235	83	384061	9081	0.78587	0.132068	0.306664	0.13729	1.35888	1.0383	1.77846	2.675e-09	0.0255	-1	-1	0	D J01FA Macrolides [DG:DG01551]	C	p1yr
J01FA	1054	264	2204	336	0.30975	0.102354	0.211713	0.109211	1.23579	0.997598	1.53086	0.002492	0.05263	-1	0	-1	D J01FA Macrolides [DG:DG01551]	A	p5yr
J01FA	1054	264	346047	47095	0.418787	0.0777752	0.20965	0.081366	1.23325	1.05146	1.44647	7.266e-08	0.009977	-1	-1	0	D J01FA Macrolides [DG:DG01551]	C	p5yr
C09AA	3209	649	327125	66017	-0.207374	0.0513484	-0.17538	0.0521176	0.839138	0.757654	0.929386	5.379e-05	0.0007653	1	1		D C09AA ACE inhibitors, plain [DG:DG01501]	E	p2yr
C10AA	2514	1344	249370	143772	-0.14982	0.0415283	-0.16249	0.043337	0.850024	0.780805	0.92538	0.000309	0.0001772	1	1		D C10AA HMG CoA reductase inhibitors [DG:DG01660]	E	p2yr
H03AA	3585	273	358601	34541	-0.225512	0.0656614	-0.237464	0.0658236	0.788625	0.693173	0.897222	0.0005938	0.0003091	1	1		D H03AA Thyroid hormones	E	p2yr
J07BB	3484	374	342364	50778	-0.19039	0.0569614	-0.287589	0.0561952	0.75007	0.671844	0.837405	0.0008305	3.095e-07	1	1		D J07BB Influenza vaccines	E	p2yr
A10AE	3816	42	389850	3292	-0.443401	0.214439	-0.441868	0.215029	0.642834	0.42176	0.979789	0.03867	0.03989	1	1		D A10AE Insulins and analogues for injection, long-acting	E	p2yr
J07CA	3777	81	382676	10466	-0.21593	0.107107	-0.193994	0.107247	0.823663	0.667514	1.01634	0.0438	0.07048	1	0		D J07CA Bacterial and viral vaccines, combined	E	p2yr
J01FA	1265	53	2510	30	1.18486	0.2612	0.650348	0.289008	1.91621	1.08733	3.37695	5.902e-06	0.02449	-1	-1	0	D J01FA Macrolides [DG:DG01551]	A	p6m
J01FA	159	11	3616	72	1.1466	0.432663	0.10222	0.546288	1.10763	0.379529	3.23253	0.00808	0.8516	-1	0	-1	D J01FA Macrolides [DG:DG01551]	B	p6m
J01FA	1265	53	390713	2429	1.7226	0.161839	0.688092	0.177557	1.98992	1.40507	2.8182	1.878e-26	0.0001065	-1	-1	0	D J01FA Macrolides [DG:DG01551]	C	p6m
J01FA	159	11	390713	2429	2.19835	0.380248	0.60154	0.464814	1.82493	0.733827	4.53834	7.416e-09	0.1956	-1	0	-1	D J01FA Macrolides [DG:DG01551]	D	p6m
J01FA	3775	83	390713	2429	1.17757	0.123851	0.457551	0.131429	1.5802	1.22135	2.04449	1.955e-21	0.0004989	-1	-1	0	D J01FA Macrolides [DG:DG01551]	E	p6m
J01FA	1265	53	26328	649	0.583337	0.165295	0.202466	0.173965	1.22442	0.870651	1.72193	0.0004177	0.2445	-1	0	-1	D J01FA Macrolides [DG:DG01551]	G	p6m
J01XE	139	31	3402	286	0.760694	0.255947	0.341838	0.284593	1.40753	0.80563	2.45913	0.002976	0.2298	-1	0	-1	D J01XE Nitrofuran derivatives	B	p1yr
J01XE	1176	142	374700	18442	0.881303	0.0997852	0.517194	0.10371	1.67732	1.36879	2.05538	1.032e-18	6.137e-07	-1	-1	0	D J01XE Nitrofuran derivatives	C	p1yr
J01XE	139	31	374700	18442	1.51781	0.231057	0.870495	0.244233	2.38809	1.47965	3.85428	5.072e-11	0.000365	-1	-1	0	D J01XE Nitrofuran derivatives	D	p1yr
J07BB	3484	374	22138	4839	-0.503063	0.059567	-0.46731	0.0589937	0.626686	0.558255	0.703505	3.163e-17	2.428e-15	1	1		D J07BB Influenza vaccines	F	p2yr
A02BC	2372	1486	14288	12689	-0.221975	0.0373918	-0.182433	0.0385324	0.833241	0.772628	0.898608	2.943e-09	2.205e-06	1	1		D A02BC Proton pump inhibitors [DG:DG01646]	F	p2yr
G03CA	3615	243	24712	2265	-0.36021	0.0691184	-0.307994	0.0696253	0.734919	0.641169	0.842378	1.885e-07	9.74e-06	1	1		D G03CA Natural and semisynthetic estrogens, plain	F	p2yr
N03AX	3525	333	24025	2952	-0.315644	0.0702976	-0.267085	0.0729096	0.765608	0.663656	0.883222	7.145e-06	0.0002495	1	1		D N03AX Other antiepileptics	F	p2yr
A03FA	3806	52	26276	701	-0.665652	0.161244	-0.611505	0.163611	0.542534	0.393691	0.747649	3.665e-05	0.0001861	1	1		D A03FA Propulsives [DG:DG01763]	F	p2yr
J01MA	3775	83	26014	963	-0.527391	0.130588	-0.508149	0.132085	0.601608	0.464385	0.77938	5.39e-05	0.0001197	1	1		D J01MA Fluoroquinolones [DG:DG01549]	F	p2yr
C05AX	3753	105	25921	1056	-0.447728	0.111663	-0.406764	0.112531	0.665802	0.534016	0.83011	6.096e-05	0.0003012	1	1		D C05AX Other agents for treatment of hemorrhoids and anal fissures for topical use	F	p2yr
C07AB	3375	483	22219	4758	-0.250781	0.064075	-0.233568	0.0646204	0.791704	0.697518	0.898607	9.103e-05	0.0003015	1	1		D C07AB Beta blocking agents, selective	F	p2yr
N02AX	3699	159	25430	1547	-0.380996	0.0987436	-0.249576	0.101007	0.779131	0.639189	0.949711	0.0001143	0.01348	1	1		D N02AX Other opioids	F	p2yr
N06AA	3498	360	23773	3204	-0.231503	0.0635029	-0.147741	0.0653206	0.862654	0.758986	0.980483	0.0002673	0.02372	1	1		D N06AA Non-selective monoamine reuptake inhibitors [DG:DG01730]	F	p2yr
J01XE	3541	317	374700	18442	0.622647	0.062459	0.415223	0.0640127	1.51471	1.33611	1.71719	2.099e-23	8.791e-11	-1	-1	0	D J01XE Nitrofuran derivatives	E	p1yr
J01XE	139	31	24282	2695	0.730916	0.230635	0.296301	0.248552	1.34487	0.826237	2.18907	0.001531	0.2332	-1	0	-1	D J01XE Nitrofuran derivatives	H	p1yr
J01XE	132	38	3230	458	0.502236	0.24121	0.0792662	0.27055	1.08249	0.636882	1.83989	0.03739	0.7696	-1	0	-1	D J01XE Nitrofuran derivatives	B	p2yr
J01XE	1118	200	356872	36270	0.565946	0.0863379	0.260058	0.0897156	1.297	1.08787	1.54635	5.57e-11	0.003747	-1	-1	0	D J01XE Nitrofuran derivatives	C	p2yr
J01XE	132	38	356872	36270	0.964437	0.2204	0.411662	0.233983	1.50932	0.954148	2.38753	1.21e-05	0.07852	-1	0	-1	D J01XE Nitrofuran derivatives	D	p2yr
J01XE	3362	496	356872	36270	0.423626	0.0508094	0.25435	0.0520174	1.28962	1.16462	1.42804	7.609e-17	1.01e-06	-1	-1	0	D J01XE Nitrofuran derivatives	E	p2yr
J01XE	1234	84	2465	75	0.661129	0.186093	0.303433	0.209095	1.3545	0.898961	2.04088	0.0003859	0.1468	-1	0	-1	D J01XE Nitrofuran derivatives	A	p6m
J01XE	150	20	3549	139	0.835867	0.316903	0.340963	0.35946	1.4063	0.695038	2.84543	0.008383	0.3429	-1	0	-1	D J01XE Nitrofuran derivatives	B	p6m
J01XE	1234	84	387245	5897	1.46566	0.126445	0.837019	0.135761	2.30947	1.76992	3.01351	4.612e-31	7.038e-10	-1	-1	0	D J01XE Nitrofuran derivatives	C	p6m
C10AA	821	497	15850	11127	-0.467026	0.0738902	-0.333514	0.077732	0.716402	0.61516	0.834305	2.645e-10	1.788e-05	1	1		D C10AA HMG CoA reductase inhibitors [DG:DG01660]	G	p2yr
A02BC	789	529	14288	12689	-0.392392	0.0652227	-0.44525	0.0687231	0.640664	0.559926	0.733044	1.808e-09	9.392e-11	1	1		D A02BC Proton pump inhibitors [DG:DG01646]	G	p2yr
J07BB	1161	157	22138	4839	-0.461479	0.0964526	-0.471381	0.0967895	0.62414	0.516287	0.754523	1.723e-06	1.121e-06	1	1		D J07BB Influenza vaccines	G	p2yr
C09AA	1074	244	21582	5395	-0.345995	0.0908644	-0.265283	0.0971301	0.766989	0.634028	0.927833	0.0001405	0.006314	1	1		D C09AA ACE inhibitors, plain [DG:DG01501]	G	p2yr
H03AA	1233	85	24385	2592	-0.446214	0.130116	-0.413701	0.131602	0.661199	0.510867	0.855769	0.0006059	0.001671	1	1		D H03AA Thyroid hormones	G	p2yr
G03CA	1256	62	24712	2265	-0.411647	0.135777	-0.384199	0.136724	0.680996	0.520907	0.890285	0.002433	0.004957	1	1		D G03CA Natural and semisynthetic estrogens, plain	G	p2yr
C09CA	1177	141	23739	3238	-0.326529	0.113221	-0.292164	0.119283	0.746646	0.590985	0.943307	0.00393	0.01432	1	1		D C09CA Angiotensin II receptor blockers, plain [DG:DG01495]	G	p2yr
S01EE	1294	24	26139	838	-0.736073	0.26034	-0.722484	0.261485	0.485545	0.290833	0.810616	0.004697	0.005731	1	1		D S01EE Prostaglandin analogues	G	p2yr
C07AB	1092	226	22219	4758	-0.274006	0.100166	-0.149661	0.105703	0.861	0.699882	1.05921	0.006232	0.1568	1	0		D C07AB Beta blocking agents, selective	G	p2yr
C08CA	1034	284	21145	5832	-0.231561	0.0848057	-0.0891691	0.0878324	0.914691	0.770031	1.08653	0.006328	0.31	1	0		D C08CA Dihydropyridine derivatives [DG:DG01928]	G	p2yr
J01XE	150	20	387245	5897	2.09277	0.276844	1.03672	0.314542	2.81994	1.5223	5.22372	4.058e-14	0.000981	-1	-1	0	D J01XE Nitrofuran derivatives	D	p6m
J01XE	3699	159	387245	5897	1.02487	0.0884132	0.59988	0.0923463	1.8219	1.52026	2.18338	4.587e-31	8.259e-11	-1	-1	0	D J01XE Nitrofuran derivatives	E	p6m
J07BB	1211	107	381898	11244	1.00564	0.111987	-0.29385	0.104765	0.745388	0.607024	0.91529	2.72e-19	0.005034	-1	1	-2	D J07BB Influenza vaccines	C	p1yr
J07BB	3629	229	381898	11244	0.740005	0.0720663	-0.320293	0.0626689	0.725936	0.642029	0.82081	9.853e-25	3.208e-07	-1	1	-2	D J07BB Influenza vaccines	E	p1yr
M01AE	2762	1096	300860	92282	0.244977	0.0352898	0.109816	0.0393823	1.11607	1.03317	1.20563	3.876e-12	0.005296	-1	-1	0	D M01AE Propionic acid derivatives	E	p5yr
M02AA	3539	319	373860	19282	0.544977	0.0656164	0.319791	0.0679663	1.37684	1.20512	1.57303	9.971e-17	2.538e-06	-1	-1	0	D M02AA Antiinflammatory preparations, non-steroids for topical use	E	p1yr
M02AA	3539	319	24608	2369	0.169126	0.0705779	0.235106	0.0719187	1.26504	1.09872	1.45655	0.01657	0.00108	-1	-1	0	D M02AA Antiinflammatory preparations, non-steroids for topical use	F	p1yr
M02AA	3318	540	356016	37126	0.423721	0.0519105	0.228814	0.0540976	1.25711	1.13064	1.39772	3.29e-16	2.341e-05	-1	-1	0	D M02AA Antiinflammatory preparations, non-steroids for topical use	E	p2yr
M02AA	3318	540	23027	3950	0.182752	0.0560678	0.237373	0.0572215	1.26791	1.13339	1.4184	0.001117	3.358e-05	-1	-1	0	D M02AA Antiinflammatory preparations, non-steroids for topical use	F	p2yr
M02AA	2845	1013	313329	79813	0.326312	0.0405442	0.149275	0.0426949	1.16099	1.06779	1.26233	8.418e-16	0.0004718	-1	-1	0	D M02AA Antiinflammatory preparations, non-steroids for topical use	E	p5yr
M02AA	2845	1013	19359	7618	0.129278	0.0437261	0.172476	0.0451054	1.18824	1.0877	1.29808	0.003113	0.0001316	-1	-1	0	D M02AA Antiinflammatory preparations, non-steroids for topical use	F	p5yr
M02AA	3683	175	385354	7788	0.789697	0.089115	0.374943	0.0935121	1.45491	1.21126	1.74757	7.922e-19	6.084e-05	-1	-1	0	D M02AA Antiinflammatory preparations, non-steroids for topical use	E	p6m
M03BX	1298	20	2526	14	1.0514	0.370295	0.586318	0.391205	1.79736	0.834708	3.87022	0.004544	0.134	-1	0	-1	D M03BX Other centrally acting agents	A	p5yr
M03BX	1298	20	26701	276	0.513275	0.249561	0.289203	0.256537	1.33536	0.807654	2.20787	0.03972	0.2596	-1	0	-1	D M03BX Other centrally acting agents	G	p5yr
J07BB	160	10	22138	4839	-1.35686	0.359992	-1.38719	0.364208	0.249775	0.122327	0.510008	0.0001642	0.00014	1	1		D J07BB Influenza vaccines	H	p2yr
R01AD	160	10	23534	3443	-0.942393	0.40261	-0.883127	0.409241	0.413488	0.185396	0.9222	0.01925	0.03094	1	1		D R01AD Corticosteroids	H	p2yr
G04CB	164	6	25897	1080	-1.18309	0.585712	-1.14151	0.605918	0.319337	0.0973796	1.0472	0.0434	0.05958	1	0		D G04CB Testosterone-5-alpha reductase inhibitors	H	p2yr
C10AA	86	84	15850	11127	-0.386775	0.194782	-0.416405	0.205622	0.659413	0.440681	0.986714	0.04708	0.04287	1	1		D C10AA HMG CoA reductase inhibitors [DG:DG01660]	H	p2yr
M05BA	151	19	3568	120	1.1978	0.322745	0.684541	0.370117	1.98286	0.959728	4.09673	0.0002091	0.06446	-1	0	-1	D M05BA Bisphosphonates [DG:DG01600]	B	p1yr
M05BA	151	19	379446	13696	1.19509	0.285516	0.873849	0.297381	2.39611	1.33775	4.2918	2.843e-05	0.003298	-1	-1	0	D M05BA Bisphosphonates [DG:DG01600]	D	p1yr
M05BA	151	19	25664	1313	1.01156	0.286722	0.730612	0.303603	2.07635	1.14515	3.76478	0.0004194	0.01611	-1	-1	0	D M05BA Bisphosphonates [DG:DG01600]	H	p1yr
M05BA	151	19	3539	149	0.918958	0.318403	0.499188	0.388253	1.64738	0.769499	3.5268	0.003922	0.1986	-1	0	-1	D M05BA Bisphosphonates [DG:DG01600]	B	p2yr
M05BA	151	19	25363	1614	0.79051	0.286047	0.411775	0.330057	1.50949	0.790449	2.88263	0.005721	0.2122	-1	0	-1	D M05BA Bisphosphonates [DG:DG01600]	H	p2yr
M05BA	146	24	3490	198	0.792762	0.299024	0.462973	0.357821	1.58879	0.787757	3.20436	0.008054	0.1958	-1	0	-1	D M05BA Bisphosphonates [DG:DG01600]	B	p5yr
M05BA	146	24	24705	2272	0.593835	0.270591	0.243931	0.310269	1.27626	0.694744	2.3445	0.0282	0.4318	-1	0	-1	D M05BA Bisphosphonates [DG:DG01600]	H	p5yr
M05BA	153	17	3600	88	1.38782	0.347777	0.736904	0.411175	2.08946	0.933103	4.67883	6.716e-05	0.07318	-1	0	-1	D M05BA Bisphosphonates [DG:DG01600]	B	p6m
M05BA	153	17	25918	1059	1.0995	0.30261	0.712491	0.330811	2.03906	1.06618	3.89969	0.0002802	0.03127	-1	-1	0	D M05BA Bisphosphonates [DG:DG01600]	H	p6m
C10AA	744	574	1617	923	-0.610507	0.0912542	-0.55643	0.0985204	0.573252	0.472561	0.695397	2.552e-11	1.743e-08	1	1		D C10AA HMG CoA reductase inhibitors [DG:DG01660]	A	p5yr
C09AA	1005	313	2051	489	-0.335908	0.106704	-0.255127	0.116244	0.774818	0.61691	0.973146	0.001656	0.02824	1	1		D C09AA ACE inhibitors, plain [DG:DG01501]	A	p5yr
A10BA	1143	175	2336	204	-0.427385	0.179837	-0.158625	0.193122	0.853316	0.584349	1.24609	0.01753	0.4115	1	0		D A10BA Biguanides [DG:DG01684]	A	p5yr
H03AA	1232	86	2350	190	-0.369785	0.156021	-0.38167	0.163228	0.68272	0.495745	0.940215	0.01783	0.01943	1	1		D H03AA Thyroid hormones	A	p5yr
S01EE	1287	31	2480	60	-0.628169	0.272663	-0.527812	0.286216	0.589894	0.336565	1.0339	0.02129	0.06525	1	0		D S01EE Prostaglandin analogues	A	p5yr
A03AA	1278	40	2440	100	-0.50172	0.219954	-0.594584	0.232735	0.551792	0.349629	0.87085	0.0226	0.01066	1	1		D A03AA Synthetic anticholinergics, esters with tertiary amino group	A	p5yr
A02BC	612	706	1267	1273	-0.16672	0.075021	-0.250052	0.0806346	0.77876	0.664884	0.912141	0.02632	0.001942	1	1		D A02BC Proton pump inhibitors [DG:DG01646]	A	p5yr
C09CA	1153	165	2303	237	-0.279049	0.137816	-0.200092	0.149256	0.818655	0.610962	1.09695	0.04296	0.1801	1	0		D C09CA Angiotensin II receptor blockers, plain [DG:DG01495]	A	p5yr
N02AA	1220	98	2497	43	1.23685	0.220144	0.580331	0.270219	1.78663	1.05184	3.03472	2.065e-08	0.03181	-1	-1	0	D N02AA Natural opium alkaloids	A	p1yr
N02AA	134	36	3583	105	1.8316	0.27388	0.622544	0.395083	1.86366	0.858945	4.04361	2.597e-11	0.1152	-1	0	-1	D N02AA Natural opium alkaloids	B	p1yr
N02AA	1220	98	387416	5726	1.3139	0.127872	0.19777	0.151801	1.21868	0.905059	1.64098	9.191e-25	0.1926	-1	0	-1	D N02AA Natural opium alkaloids	C	p1yr
N02AA	134	36	387416	5726	2.55738	0.231916	0.695787	0.312757	2.00529	1.08632	3.70166	2.852e-28	0.0261	-1	-1	0	D N02AA Natural opium alkaloids	D	p1yr
N02AA	3717	141	387416	5726	0.72672	0.101493	0.0448782	0.113129	1.0459	0.837905	1.30553	8.063e-13	0.6916	-1	0	-1	D N02AA Natural opium alkaloids	E	p1yr
N02AA	1220	98	25729	1248	0.464501	0.129041	-0.0130137	0.148605	0.987071	0.737649	1.32083	0.0003192	0.9302	-1	0	-1	D N02AA Natural opium alkaloids	G	p1yr
N02AA	134	36	25729	1248	1.73952	0.229981	0.413753	0.315346	1.51248	0.815184	2.80625	4.04e-14	0.1895	-1	0	-1	D N02AA Natural opium alkaloids	H	p1yr
N02AA	130	40	3536	152	1.62798	0.255183	0.422466	0.219731	1.52572	0.991698	2.34731	1.986e-10	0.0546	-1	0	-1	D N02AA Natural opium alkaloids	A	p2yr
N02AA	130	40	3536	152	1.62798	0.255183	0.622253	0.345106	1.86312	0.947094	3.66513	1.986e-10	0.07145	-1	0	-1	D N02AA Natural opium alkaloids	B	p2yr
N02AA	1197	121	384564	8578	1.15884	0.115278	0.314835	0.131216	1.37003	1.05935	1.77183	9.009e-24	0.01642	-1	-1	0	D N02AA Natural opium alkaloids	C	p2yr
N02AA	130	40	384564	8578	2.34239	0.219619	0.85388	0.284114	2.34874	1.34585	4.09897	1.485e-26	0.002652	-1	-1	0	D N02AA Natural opium alkaloids	D	p2yr
N02AA	3666	192	384564	8578	0.647298	0.0870984	0.116786	0.0950854	1.12388	0.932787	1.35412	1.073e-13	0.2194	-1	0	-1	D N02AA Natural opium alkaloids	E	p2yr
N02AA	1197	121	25359	1618	0.42751	0.116821	0.0722714	0.131779	1.07495	0.830256	1.39175	0.0002531	0.5834	-1	0	-1	D N02AA Natural opium alkaloids	G	p2yr
N02AA	130	40	25359	1618	1.6539	0.21906	0.555484	0.290506	1.74278	0.986174	3.07988	4.491e-14	0.05587	-1	0	-1	D N02AA Natural opium alkaloids	H	p2yr
N02AA	1156	162	2410	130	0.55779	0.147359	0.0959416	0.171005	1.10069	0.787156	1.53912	0.0001559	0.5748	-1	0	-1	D N02AA Natural opium alkaloids	A	p5yr
N02AA	124	46	3442	246	1.27131	0.241329	0.280368	0.315758	1.32362	0.712695	2.45822	1.456e-07	0.3746	-1	0	-1	D N02AA Natural opium alkaloids	B	p5yr
N02AA	1156	162	377818	15324	0.840464	0.103068	0.24172	0.11279	1.27344	1.02087	1.58849	3.518e-16	0.03211	-1	-1	0	D N02AA Natural opium alkaloids	C	p5yr
N02AA	124	46	377818	15324	1.81291	0.212335	0.67533	0.250004	1.96468	1.20362	3.20698	1.371e-17	0.006908	-1	-1	0	D N02AA Natural opium alkaloids	D	p5yr
N02AA	3566	292	377818	15324	0.515505	0.070871	0.155932	0.0754177	1.16875	1.00815	1.35493	3.5e-13	0.03868	-1	-1	0	D N02AA Natural opium alkaloids	E	p5yr
N02AA	1156	162	24563	2414	0.270044	0.104852	0.0793533	0.114197	1.08259	0.865474	1.35416	0.01001	0.4871	-1	0	-1	D N02AA Natural opium alkaloids	G	p5yr
G04CB	163	7	3580	108	-1.23348	0.597259	-1.20085	0.629715	0.300939	0.0875576	1.03434	0.03897	0.0566	1	0		D G04CB Testosterone-5-alpha reductase inhibitors	B	p5yr
N02AA	124	46	24563	2414	1.30797	0.21379	0.420054	0.260229	1.52204	0.913924	2.5348	9.605e-10	0.1065	-1	0	-1	D N02AA Natural opium alkaloids	H	p5yr
N02AA	1230	88	2513	27	1.53566	0.253746	0.707124	0.291291	2.02815	1.14571	3.59026	1.569e-09	0.01525	-1	-1	0	D N02AA Natural opium alkaloids	A	p6m
N02AA	136	34	3607	81	1.9766	0.285723	0.514436	0.448121	1.67269	0.69479	4.02698	5.348e-12	0.251	-1	0	-1	D N02AA Natural opium alkaloids	B	p6m
N02AA	1230	88	389760	3382	1.74654	0.135163	0.307705	0.168013	1.3603	0.978635	1.89081	3.458e-38	0.06704	-1	0	-1	D N02AA Natural opium alkaloids	C	p6m
N02AA	136	34	389760	3382	3.1213	0.239541	0.614953	0.35843	1.84957	0.916165	3.73394	8.379e-39	0.08622	-1	0	-1	D N02AA Natural opium alkaloids	D	p6m
N02AA	3743	115	389760	3382	1.07717	0.111638	0.0928483	0.128233	1.0973	0.853437	1.41083	5e-22	0.469	-1	0	-1	D N02AA Natural opium alkaloids	E	p6m
N02AA	1230	88	26022	955	0.651319	0.135801	0.122358	0.159623	1.13016	0.826537	1.54531	1.626e-06	0.4434	-1	0	-1	D N02AA Natural opium alkaloids	G	p6m
N02AA	136	34	26022	955	1.94799	0.235765	0.372738	0.344903	1.4517	0.738385	2.85412	1.492e-16	0.2798	-1	0	-1	D N02AA Natural opium alkaloids	H	p6m
N02AE	159	11	3651	37	1.04085	0.504187	0.0605674	0.600304	1.06244	0.327463	3.44704	0.03905	0.9196	-1	0	-1	D N02AE Oripavine derivatives	B	p1yr
N02AE	159	11	26610	367	1.11731	0.428356	0.424275	0.465545	1.52848	0.613719	3.80672	0.009103	0.3621	-1	0	-1	D N02AE Oripavine derivatives	H	p1yr
N02AE	158	12	390494	2648	1.42283	0.393729	-0.0262179	0.425426	0.974123	0.423145	2.24253	0.0003019	0.9509	-1	0	-1	D N02AE Oripavine derivatives	D	p2yr
N02AE	158	12	26511	466	1.02704	0.398318	0.119396	0.447727	1.12682	0.468522	2.71004	0.00993	0.7897	-1	0	-1	D N02AE Oripavine derivatives	H	p2yr
N02AE	159	11	26688	289	1.35973	0.432845	0.662056	0.471671	1.93877	0.76917	4.88689	0.001683	0.1604	-1	0	-1	D N02AE Oripavine derivatives	H	p6m
N02AJ	3501	357	369619	23523	0.388397	0.0603471	0.0233265	0.07956	1.0236	0.875808	1.19633	1.228e-10	0.7694	-1	0	-1	D N02AJ Opioids in combination with non-opioid analgesics	E	p1yr
N02AJ	3333	525	355322	37820	0.299322	0.0507523	-0.0835086	0.0698715	0.919883	0.802154	1.05489	3.689e-09	0.232	-1	0	-1	D N02AJ Opioids in combination with non-opioid analgesics	E	p2yr
N02AJ	2883	975	320833	72309	0.320647	0.0395023	0.0143792	0.0581219	1.01448	0.905255	1.13689	4.785e-16	0.8046	-1	0	-1	D N02AJ Opioids in combination with non-opioid analgesics	E	p5yr
N02BE	89	81	2952	736	0.7048	0.203229	0.000310551	0.246177	1.00031	0.617336	1.62087	0.0005301	0.999	-1	0	-1	D N02BE Anilides	B	p1yr
N02BE	948	370	343710	49432	0.55556	0.0768789	0.13121	0.0833591	1.14021	0.968341	1.34258	4.968e-13	0.1155	-1	0	-1	D N02BE Anilides	C	p1yr
N02BE	89	81	343710	49432	1.27649	0.194896	0.389465	0.220646	1.47619	0.957917	2.27487	5.777e-11	0.07755	-1	0	-1	D N02BE Anilides	D	p1yr
N02BE	3041	817	343710	49432	0.525324	0.0466226	0.260061	0.0649252	1.29701	1.14203	1.47302	1.917e-29	6.189e-05	-1	-1	0	D N02BE Anilides	E	p1yr
N02BE	89	81	20616	6361	0.809295	0.191786	0.0958703	0.222026	1.10062	0.712261	1.70072	2.453e-05	0.6659	-1	0	-1	D N02BE Anilides	H	p1yr
C10AA	744	574	237935	155207	-0.560475	0.0735486	-0.525794	0.0749893	0.591086	0.510293	0.684671	2.533e-14	2.36e-12	1	1		D C10AA HMG CoA reductase inhibitors [DG:DG01660]	C	p5yr
C09AA	1005	313	316247	76895	-0.352677	0.0834334	-0.332642	0.088494	0.717027	0.602849	0.852828	2.368e-05	0.0001707	1	1		D C09AA ACE inhibitors, plain [DG:DG01501]	C	p5yr
H03AA	1232	86	358061	35081	-0.496625	0.127662	-0.524008	0.128002	0.592143	0.460756	0.760995	0.0001002	4.245e-05	1	1		D H03AA Thyroid hormones	C	p5yr
A10BA	1143	175	365792	27350	-0.392638	0.13718	-0.19458	0.140273	0.82318	0.625308	1.08367	0.004207	0.1654	1	0		D A10BA Biguanides [DG:DG01684]	C	p5yr
C09CA	1153	165	353839	39303	-0.277539	0.105377	-0.341246	0.109886	0.710884	0.573143	0.881727	0.008444	0.0019	1	1		D C09CA Angiotensin II receptor blockers, plain [DG:DG01495]	C	p5yr
S01EE	1287	31	381566	11576	-0.551533	0.22187	-0.44526	0.235147	0.640658	0.404081	1.01574	0.01293	0.05829	1	0		D S01EE Prostaglandin analogues	C	p5yr
S01ED	1303	15	386366	6776	-0.705415	0.315344	-0.471262	0.333606	0.624214	0.324614	1.20033	0.02529	0.1578	1	0		D S01ED Beta blocking agents	C	p5yr
C08CA	967	351	310104	83038	-0.175898	0.0790492	-0.0766296	0.0812289	0.926233	0.78991	1.08608	0.02607	0.3455	1	0		D C08CA Dihydropyridine derivatives [DG:DG01928]	C	p5yr
N02BE	78	92	2736	952	0.637527	0.20119	0.0169514	0.240979	1.0171	0.634125	1.63136	0.001543	0.9439	-1	0	-1	D N02BE Anilides	B	p2yr
N02BE	862	456	325789	67353	0.501277	0.0712545	0.112615	0.0776016	1.1192	0.961287	1.30305	1.996e-12	0.1467	-1	0	-1	D N02BE Anilides	C	p2yr
N02BE	78	92	325789	67353	1.2188	0.193559	0.442098	0.223551	1.55597	1.00395	2.41151	3.042e-10	0.04797	-1	-1	0	D N02BE Anilides	D	p2yr
N02BE	2814	1044	325789	67353	0.474984	0.0419457	0.294582	0.0612634	1.34256	1.19066	1.51385	1.011e-29	1.522e-06	-1	-1	0	D N02BE Anilides	E	p2yr
N02BE	78	92	19013	7964	0.778014	0.191574	0.152088	0.219293	1.16426	0.757496	1.78946	4.897e-05	0.488	-1	0	-1	D N02BE Anilides	H	p2yr
N02BE	54	116	2266	1422	0.662586	0.209558	0.0799153	0.239123	1.0832	0.677798	1.73107	0.00158	0.7382	-1	0	-1	D N02BE Anilides	B	p5yr
N02BE	694	624	281164	111978	0.395713	0.06525	0.090951	0.0708945	1.09522	0.953134	1.25848	1.324e-09	0.1995	-1	0	-1	D N02BE Anilides	C	p5yr
N02BE	54	116	281164	111978	1.13752	0.202479	0.472652	0.224004	1.60424	1.03418	2.48853	1.933e-08	0.03486	-1	-1	0	D N02BE Anilides	D	p5yr
N02BE	2320	1538	281164	111978	0.413565	0.0364856	0.1926	0.056616	1.2124	1.08506	1.35468	8.895e-30	0.0006693	-1	-1	0	D N02BE Anilides	E	p5yr
N02BE	54	116	15452	11525	0.769724	0.201556	0.195971	0.223146	1.21649	0.785521	1.88391	0.0001343	0.3798	-1	0	-1	D N02BE Anilides	H	p5yr
N02BE	1004	314	2246	294	0.385815	0.110543	-0.0788573	0.130955	0.924172	0.714904	1.1947	0.0004881	0.5471	-1	0	-1	D N02BE Anilides	A	p6m
N02BE	96	74	3154	534	0.89681	0.207925	0.0639453	0.261237	1.06603	0.638756	1.77913	1.65e-05	0.8066	-1	0	-1	D N02BE Anilides	B	p6m
N02BE	1004	314	364531	28611	0.945662	0.0821071	0.42966	0.090788	1.53674	1.28623	1.83602	1.09e-30	2.218e-06	-1	-1	0	D N02BE Anilides	C	p6m
N02BE	96	74	364531	28611	1.68825	0.197281	0.646073	0.227614	1.90803	1.22135	2.9808	1.157e-17	0.004533	-1	-1	0	D N02BE Anilides	D	p6m
N02BE	3250	608	364531	28611	0.739262	0.0535129	0.339542	0.0589513	1.4043	1.25107	1.57631	2.129e-43	8.432e-09	-1	-1	0	D N02BE Anilides	E	p6m
N02BE	96	74	22021	4956	0.939422	0.193994	0.20045	0.224541	1.22195	0.786893	1.89755	1.289e-06	0.372	-1	0	-1	D N02BE Anilides	H	p6m
C10AA	69	101	237935	155207	-0.476403	0.201001	-0.512413	0.205075	0.599048	0.400775	0.895411	0.01778	0.01247	1	1		D C10AA HMG CoA reductase inhibitors [DG:DG01660]	D	p5yr
J07BB	147	23	321673	71469	-0.548673	0.247481	-0.707719	0.253448	0.492767	0.299851	0.8098	0.02662	0.005233	1	1		D J07BB Influenza vaccines	D	p5yr
G04CB	163	7	381421	11721	-1.11894	0.563047	-1.32864	0.573937	0.264837	0.0859885	0.815672	0.04689	0.02062	1	1		D G04CB Testosterone-5-alpha reductase inhibitors	D	p5yr
N02BG	3785	73	26500	477	0.289396	0.141436	0.365727	0.144295	1.44156	1.08644	1.91277	0.04075	0.01126	-1	-1	0	D N02BG Other analgesics and antipyretics	F	p5yr
N03AX	1163	155	2430	110	0.637738	0.158865	0.453827	0.178245	1.57433	1.11	2.23288	6.075e-05	0.01093	-1	-1	0	D N03AX Other antiepileptics	A	p1yr
N03AX	137	33	3456	232	0.852802	0.281416	0.395826	0.322487	1.48561	0.789436	2.79572	0.002459	0.2197	-1	0	-1	D N03AX Other antiepileptics	B	p1yr
N03AX	137	33	376275	16867	1.07328	0.251199	0.250132	0.268894	1.2842	0.758136	2.17528	1.932e-05	0.3523	-1	0	-1	D N03AX Other antiepileptics	D	p1yr
N03AX	137	33	24621	2356	0.720297	0.249746	0.207343	0.275256	1.2304	0.717364	2.11036	0.003928	0.4513	-1	0	-1	D N03AX Other antiepileptics	H	p1yr
N03AX	135	35	3390	298	0.705558	0.27115	0.305895	0.156671	1.35784	0.998729	1.84607	0.009301	0.05096	-1	0	-1	D N03AX Other antiepileptics	A	p2yr
N03AX	135	35	3390	298	0.705558	0.27115	0.343775	0.304798	1.41026	0.77584	2.56346	0.009301	0.2594	-1	0	-1	D N03AX Other antiepileptics	B	p2yr
N03AX	135	35	371187	21955	0.89107	0.243124	0.162648	0.261414	1.17662	0.704888	1.96406	0.0002473	0.5338	-1	0	-1	D N03AX Other antiepileptics	D	p2yr
N03AX	1078	240	2276	264	0.325975	0.116422	0.145272	0.128601	1.15635	0.898651	1.48796	0.005137	0.2587	-1	0	-1	D N03AX Other antiepileptics	A	p5yr
N03AX	1186	132	2457	83	0.735242	0.176947	0.457355	0.202012	1.57989	1.06321	2.34765	3.322e-05	0.02363	-1	-1	0	D N03AX Other antiepileptics	A	p6m
N03AX	139	31	3504	184	1.01928	0.294008	0.50278	0.336722	1.65331	0.854368	3.19937	0.0005324	0.1355	-1	0	-1	D N03AX Other antiepileptics	B	p6m
N03AX	139	31	381073	12069	1.32659	0.257182	0.37816	0.28816	1.4596	0.829754	2.56753	2.495e-07	0.1894	-1	0	-1	D N03AX Other antiepileptics	D	p6m
N03AX	139	31	25019	1958	0.841722	0.257682	0.273261	0.286334	1.31424	0.749785	2.30364	0.00109	0.3399	-1	0	-1	D N03AX Other antiepileptics	H	p6m
N04BA	1290	28	2520	20	0.801894	0.344512	0.286325	0.383826	1.33153	0.627382	2.82596	0.01998	0.4557	-1	0	-1	D N04BA Dopa and dopa derivatives	A	p5yr
N04BA	1290	28	26567	410	0.483057	0.218834	0.205926	0.229136	1.22866	0.784121	1.92523	0.02729	0.3688	-1	0	-1	D N04BA Dopa and dopa derivatives	G	p5yr
N05AB	1281	37	2512	28	0.972073	0.27652	1.03091	0.295569	2.80362	1.57055	5.00482	0.0004442	0.0004924	-1	-1	0	D N05AB Phenothiazines with piperazine structure	A	p1yr
N05AB	1295	23	2530	10	1.60261	0.423692	1.40413	0.445823	4.07199	1.69903	9.75915	0.0001576	0.001648	-1	-1	0	D N05AB Phenothiazines with piperazine structure	A	p6m
J07BB	3320	538	321673	71469	-0.179992	0.0487667	-0.210323	0.0496862	0.810322	0.735131	0.893204	0.0002235	2.306e-05	1	1		D J07BB Influenza vaccines	E	p5yr
H03AA	3582	276	358061	35081	-0.234233	0.0653727	-0.252363	0.0654897	0.776963	0.683369	0.883376	0.0003397	0.0001165	1	1		D H03AA Thyroid hormones	E	p5yr
J07AL	3793	65	382801	10341	-0.35866	0.123947	-0.255663	0.126125	0.774403	0.604796	0.991573	0.003808	0.04266	1	1		D J07AL Pneumococcal vaccines	E	p5yr
C09AA	3056	802	316247	76895	-0.135621	0.0481385	-0.118079	0.0487196	0.888626	0.807697	0.977663	0.004843	0.01537	1	1		D C09AA ACE inhibitors, plain [DG:DG01501]	E	p5yr
J07AP	3743	115	378194	14948	-0.207825	0.0900303	-0.129659	0.0944554	0.878395	0.729943	1.05704	0.02098	0.1698	1	0		D J07AP Typhoid vaccines	E	p5yr
C10AB	3837	21	390666	2476	-0.633914	0.287013	-0.653984	0.287578	0.51997	0.295931	0.913621	0.0272	0.02296	1	1		D C10AB Fibrates	E	p5yr
C10AA	2361	1497	237935	155207	-0.0852664	0.0408115	-0.117433	0.0415	0.8892	0.819737	0.964549	0.03668	0.004659	1	1		D C10AA HMG CoA reductase inhibitors [DG:DG01660]	E	p5yr
S01EC	3825	33	387931	5211	-0.389253	0.191552	-0.374198	0.191909	0.68784	0.472209	1.00194	0.04214	0.05119	1	0		D S01EC Carbonic anhydrase inhibitors	E	p5yr
J07CA	3585	273	359745	33397	-0.116978	0.0592778	-0.0713822	0.0620239	0.931106	0.824526	1.05146	0.04845	0.2498	1	0		D J07CA Bacterial and viral vaccines, combined	E	p5yr
N05AD	1306	12	26897	80	0.810414	0.390177	0.0493167	0.423063	1.05055	0.458449	2.40738	0.03781	0.9072	-1	0	-1	D N05AD Butyrophenone derivatives [DG:DG01940]	G	p5yr
J07BB	3320	538	20551	6426	-0.424227	0.0512668	-0.386914	0.0523332	0.67915	0.61294	0.752512	1.337e-16	1.469e-13	1	1		D J07BB Influenza vaccines	F	p5yr
G03CA	3494	364	23731	3246	-0.314955	0.0596114	-0.269788	0.060177	0.763541	0.67859	0.859127	1.276e-07	7.378e-06	1	1		D G03CA Natural and semisynthetic estrogens, plain	F	p5yr
J01MA	3676	182	25105	1872	-0.37796	0.0870837	-0.323655	0.0885118	0.723499	0.608266	0.860563	1.428e-05	0.000256	1	1		D J01MA Fluoroquinolones [DG:DG01549]	F	p5yr
J01CR	3516	342	23760	3217	-0.280425	0.0661886	-0.241068	0.0677046	0.785788	0.688134	0.897301	2.274e-05	0.0003706	1	1		D J01CR Combinations of penicillins, incl. beta-lactamase inhibitors	F	p5yr
N03AX	3354	504	22739	4238	-0.235674	0.0575124	-0.206369	0.0602687	0.813532	0.72289	0.915541	4.182e-05	0.0006175	1	1		D N03AX Other antiepileptics	F	p5yr
A03FA	3737	121	25628	1349	-0.418772	0.104629	-0.37949	0.106672	0.68421	0.55512	0.84332	6.283e-05	0.0003749	1	1		D A03FA Propulsives [DG:DG01763]	F	p5yr
C05AX	3603	255	24782	2195	-0.276513	0.0720748	-0.234823	0.0729673	0.790711	0.685339	0.912284	0.0001251	0.001291	1	1		D C05AX Other agents for treatment of hemorrhoids and anal fissures for topical use	F	p5yr
N02AX	3530	328	24025	2952	-0.264798	0.0691882	-0.198176	0.0718379	0.820225	0.712495	0.944244	0.0001299	0.005807	1	1		D N02AX Other opioids	F	p5yr
A02BC	1879	1979	11283	15694	-0.135947	0.0355675	-0.109025	0.0368246	0.896708	0.834267	0.963824	0.0001325	0.003072	1	1		D A02BC Proton pump inhibitors [DG:DG01646]	F	p5yr
J07AL	3793	65	26224	753	-0.491997	0.129587	-0.278568	0.132101	0.756867	0.584212	0.980547	0.0001469	0.03497	1	1		D J07AL Pneumococcal vaccines	F	p5yr
N05AX	3819	39	26835	142	0.716769	0.22121	0.295364	0.23205	1.34361	0.8526	2.11741	0.001196	0.2031	-1	0	-1	D N05AX Other antipsychotics	F	p1yr
N05AX	1295	23	26835	142	1.00675	0.281953	0.426217	0.304037	1.53145	0.84391	2.77915	0.0003567	0.161	-1	0	-1	D N05AX Other antipsychotics	G	p1yr
N05AX	1290	28	392155	987	1.45448	0.236982	0.676373	0.25465	1.96673	1.19395	3.23969	8.39e-10	0.007906	-1	-1	0	D N05AX Other antipsychotics	C	p2yr
N05AX	3812	46	392155	987	1.08001	0.179091	0.470577	0.191017	1.60092	1.10097	2.3279	1.636e-09	0.01376	-1	-1	0	D N05AX Other antipsychotics	E	p2yr
N05AX	3812	46	26804	173	0.679361	0.202297	0.186328	0.215528	1.20482	0.789689	1.83817	0.0007854	0.3873	-1	0	-1	D N05AX Other antipsychotics	F	p2yr
N05AX	1290	28	26804	173	1.04329	0.2542	0.398278	0.278987	1.48926	0.861957	2.57309	4.068e-05	0.1534	-1	0	-1	D N05AX Other antipsychotics	G	p2yr
N05AX	156	14	3640	48	1.56313	0.399753	0.560222	0.514998	1.75106	0.637962	4.80627	9.38e-05	0.2767	-1	0	-1	D N05AX Other antipsychotics	B	p5yr
N05AX	1280	38	391830	1312	1.53567	0.204758	0.867335	0.220133	2.38056	1.54633	3.66485	6.399e-14	8.148e-05	-1	-1	0	D N05AX Other antipsychotics	C	p5yr
N05AX	156	14	391830	1312	2.81363	0.349586	1.47458	0.406426	4.3692	1.96993	9.69067	8.407e-16	0.0002855	-1	-1	0	D N05AX Other antipsychotics	D	p5yr
C10AA	744	574	14700	12277	-0.376959	0.0723457	-0.293423	0.0745619	0.745706	0.644315	0.863054	1.896e-07	8.329e-05	1	1		D C10AA HMG CoA reductase inhibitors [DG:DG01660]	G	p5yr
J07BB	1090	228	20551	6426	-0.361543	0.0825523	-0.376036	0.0834186	0.686577	0.583016	0.808535	1.193e-05	6.576e-06	1	1		D J07BB Influenza vaccines	G	p5yr
A02BC	612	706	11283	15694	-0.254098	0.0620616	-0.250409	0.0646206	0.778483	0.685869	0.883602	4.246e-05	0.0001068	1	1		D A02BC Proton pump inhibitors [DG:DG01646]	G	p5yr
G03CA	1226	92	23731	3246	-0.44203	0.117485	-0.411662	0.118446	0.662548	0.525281	0.835686	0.0001686	0.0005106	1	1		D G03CA Natural and semisynthetic estrogens, plain	G	p5yr
C09AA	1005	313	20408	6569	-0.304547	0.0842192	-0.27678	0.0878135	0.758221	0.638331	0.90063	0.0002996	0.001624	1	1		D C09AA ACE inhibitors, plain [DG:DG01501]	G	p5yr
H03AA	1232	86	24351	2626	-0.450029	0.129637	-0.441188	0.13097	0.643272	0.497632	0.831536	0.0005184	0.0007565	1	1		D H03AA Thyroid hormones	G	p5yr
A03AA	1278	40	25655	1322	-0.608422	0.188877	-0.614541	0.191098	0.540889	0.37191	0.786645	0.001278	0.001302	1	1		D A03AA Synthetic anticholinergics, esters with tertiary amino group	G	p5yr
C09CA	1153	165	23302	3675	-0.316171	0.107556	-0.292742	0.111013	0.746215	0.600296	0.927602	0.003289	0.008368	1	1		D C09CA Angiotensin II receptor blockers, plain [DG:DG01495]	G	p5yr
S01EE	1287	31	25941	1036	-0.641052	0.225353	-0.461729	0.238367	0.630193	0.394973	1.0055	0.004449	0.05275	1	0		D S01EE Prostaglandin analogues	G	p5yr
S01ED	1303	15	26358	619	-0.883224	0.318897	-0.648096	0.336588	0.523041	0.270407	1.0117	0.005616	0.05418	1	0		D S01ED Beta blocking agents	G	p5yr
N05AX	3796	62	391830	1312	1.12522	0.154624	0.587585	0.165916	1.79964	1.30004	2.49123	3.416e-13	0.000398	-1	-1	0	D N05AX Other antipsychotics	E	p5yr
N05AX	3796	62	26742	235	0.686571	0.176415	0.261312	0.187185	1.29863	0.899804	1.87424	9.971e-05	0.1627	-1	0	-1	D N05AX Other antipsychotics	F	p5yr
N05AX	1280	38	26742	235	1.06709	0.22211	0.596574	0.242376	1.81589	1.1292	2.92018	1.561e-06	0.01385	-1	-1	0	D N05AX Other antipsychotics	G	p5yr
N05AX	156	14	26742	235	2.15444	0.361725	1.14244	0.44358	3.1344	1.3139	7.47735	2.617e-09	0.01001	-1	-1	0	D N05AX Other antipsychotics	H	p5yr
N05AX	3826	32	26857	120	0.768115	0.240456	0.369858	0.252803	1.44753	0.881926	2.37587	0.001403	0.1435	-1	0	-1	D N05AX Other antipsychotics	F	p6m
N05AX	1298	20	26857	120	1.11324	0.296213	0.569199	0.321098	1.76685	0.941606	3.31536	0.0001714	0.0763	-1	0	-1	D N05AX Other antipsychotics	G	p6m
N05BA	1248	70	2472	68	0.670414	0.196185	0.278325	0.223249	1.32092	0.852678	2.04628	0.0006392	0.2126	-1	0	-1	D N05BA Benzodiazepine derivatives [DG:DG01914]	A	p1yr
N05BA	150	20	3570	118	1.18029	0.323663	0.240463	0.39766	1.27184	0.583224	2.7735	0.0002692	0.5454	-1	0	-1	D N05BA Benzodiazepine derivatives [DG:DG01914]	B	p1yr
N05BA	1248	70	387526	5616	1.20284	0.136101	0.553853	0.146174	1.73994	1.3065	2.31718	9.794e-19	0.0001513	-1	-1	0	D N05BA Benzodiazepine derivatives [DG:DG01914]	C	p1yr
N05BA	150	20	387526	5616	2.03411	0.279488	0.777022	0.314385	2.17498	1.17449	4.02775	3.394e-13	0.01345	-1	-1	0	D N05BA Benzodiazepine derivatives [DG:DG01914]	D	p1yr
N05BA	3720	138	387526	5616	0.809985	0.0939013	0.398001	0.0983511	1.48885	1.22782	1.80537	6.381e-18	5.195e-05	-1	-1	0	D N05BA Benzodiazepine derivatives [DG:DG01914]	E	p1yr
N05BA	1248	70	26064	913	0.515732	0.140988	0.167185	0.152972	1.18197	0.875773	1.59523	0.0002547	0.2744	-1	0	-1	D N05BA Benzodiazepine derivatives [DG:DG01914]	G	p1yr
N05BA	150	20	26064	913	1.4506	0.283663	0.42929	0.338804	1.53617	0.790742	2.9843	3.179e-07	0.2051	-1	0	-1	D N05BA Benzodiazepine derivatives [DG:DG01914]	H	p1yr
N05BA	145	25	3505	183	1.00479	0.285341	0.292049	0.183783	1.33917	0.934006	1.92009	0.0004343	0.1121	-1	0	-1	D N05BA Benzodiazepine derivatives [DG:DG01914]	A	p2yr
N05BA	145	25	3505	183	1.00479	0.285341	0.0346366	0.365553	1.03524	0.505573	2.11983	0.0004343	0.9245	-1	0	-1	D N05BA Benzodiazepine derivatives [DG:DG01914]	B	p2yr
N05BA	1217	101	381996	11146	0.925385	0.114299	0.384767	0.122697	1.46927	1.15521	1.86871	5.687e-16	0.001713	-1	-1	0	D N05BA Benzodiazepine derivatives [DG:DG01914]	C	p2yr
N05BA	145	25	381996	11146	1.71092	0.251453	0.646742	0.28412	1.90931	1.09404	3.33212	1.018e-11	0.02283	-1	-1	0	D N05BA Benzodiazepine derivatives [DG:DG01914]	D	p2yr
J07BB	147	23	20551	6426	-0.79039	0.250191	-0.792745	0.26245	0.452601	0.270587	0.757047	0.001584	0.002525	1	1		D J07BB Influenza vaccines	H	p5yr
G04CB	163	7	25705	1272	-1.32819	0.568224	-1.23645	0.578449	0.290414	0.0934584	0.902434	0.01942	0.03256	1	1		D G04CB Testosterone-5-alpha reductase inhibitors	H	p5yr
D05AX	167	3	25621	1356	-1.95196	0.917821	-1.78761	0.928279	0.16736	0.027131	1.03238	0.03345	0.05415	1	0		D D05AX Other antipsoriatics for topical use	H	p5yr
N05BA	3650	208	381996	11146	0.511827	0.0770746	0.175736	0.0807271	1.19212	1.01767	1.39649	3.127e-11	0.02949	-1	-1	0	D N05BA Benzodiazepine derivatives [DG:DG01914]	E	p2yr
N05BA	1217	101	25514	1463	0.422534	0.118221	0.165351	0.127928	1.17981	0.91815	1.51603	0.000352	0.1962	-1	0	-1	D N05BA Benzodiazepine derivatives [DG:DG01914]	G	p2yr
N05BA	145	25	25514	1463	1.24032	0.256129	0.396118	0.308943	1.48605	0.811049	2.72281	1.289e-06	0.1998	-1	0	-1	D N05BA Benzodiazepine derivatives [DG:DG01914]	H	p2yr
N05BA	1155	163	2317	223	0.308938	0.12378	0.106792	0.135507	1.1127	0.853098	1.45131	0.01261	0.4307	-1	0	-1	D N05BA Benzodiazepine derivatives [DG:DG01914]	A	p5yr
N05BA	140	30	3332	356	0.547488	0.261282	-0.351865	0.327195	0.703375	0.37033	1.33593	0.0362	0.2823	-1	0	-1	D N05BA Benzodiazepine derivatives [DG:DG01914]	B	p5yr
N05BA	1155	163	367816	25326	0.582165	0.0929341	0.190582	0.0992374	1.20995	0.996087	1.46974	3.749e-10	0.0548	-1	0	-1	D N05BA Benzodiazepine derivatives [DG:DG01914]	C	p5yr
N05BA	140	30	367816	25326	1.07425	0.235165	-0.0184437	0.274832	0.981725	0.572864	1.6824	4.924e-06	0.9465	-1	0	-1	D N05BA Benzodiazepine derivatives [DG:DG01914]	D	p5yr
N05BA	3472	386	367816	25326	0.331609	0.0570275	0.0599245	0.0598966	1.06176	0.944149	1.19401	6.072e-09	0.3171	-1	0	-1	D N05BA Benzodiazepine derivatives [DG:DG01914]	E	p5yr
N05BA	1155	163	24208	2769	0.209734	0.0957981	0.0657687	0.102424	1.06798	0.873726	1.30542	0.02858	0.5208	-1	0	-1	D N05BA Benzodiazepine derivatives [DG:DG01914]	G	p5yr
N05BA	140	30	24208	2769	0.721799	0.240199	-0.11973	0.283937	0.88716	0.508515	1.54775	0.002658	0.6733	-1	0	-1	D N05BA Benzodiazepine derivatives [DG:DG01914]	H	p5yr
N05BA	155	15	3611	77	1.13917	0.367533	-0.00446396	0.451875	0.995546	0.41049	2.41446	0.001952	0.9921	-1	0	-1	D N05BA Benzodiazepine derivatives [DG:DG01914]	B	p6m
N05BA	1272	46	390891	2251	1.66001	0.167988	0.607222	0.190454	1.83533	1.26357	2.66581	5.029e-23	0.001431	-1	-1	0	D N05BA Benzodiazepine derivatives [DG:DG01914]	C	p6m
N05BA	155	15	390891	2251	2.61309	0.317619	0.850976	0.39891	2.34193	1.07157	5.11833	1.923e-16	0.0329	-1	-1	0	D N05BA Benzodiazepine derivatives [DG:DG01914]	D	p6m
N05BA	3766	92	390891	2251	1.33426	0.116823	0.629616	0.127001	1.87689	1.46331	2.40737	3.313e-30	7.141e-07	-1	-1	0	D N05BA Benzodiazepine derivatives [DG:DG01914]	E	p6m
N05BA	3766	92	26444	533	0.283002	0.126377	0.157229	0.132548	1.17026	0.902513	1.51745	0.02514	0.2356	-1	0	-1	D N05BA Benzodiazepine derivatives [DG:DG01914]	F	p6m
N05BA	1272	46	26444	533	0.637399	0.174425	0.146571	0.189627	1.15786	0.798431	1.67909	0.0002584	0.4396	-1	0	-1	D N05BA Benzodiazepine derivatives [DG:DG01914]	G	p6m
N05BA	155	15	26444	533	1.64583	0.323441	0.443814	0.391029	1.55864	0.724247	3.35432	3.633e-07	0.2564	-1	0	-1	D N05BA Benzodiazepine derivatives [DG:DG01914]	H	p6m
C10AA	895	423	1856	684	-0.565976	0.095497	-0.568154	0.106116	0.566571	0.46015	0.697603	3.365e-09	9.107e-08	1	1		D C10AA HMG CoA reductase inhibitors [DG:DG01660]	A	p6m
C09AA	1132	186	2223	317	-0.384683	0.125037	-0.205167	0.137641	0.814511	0.62187	1.06683	0.002109	0.1361	1	0		D C09AA ACE inhibitors, plain [DG:DG01501]	A	p6m
R03BA	1287	31	2458	82	-0.612637	0.254633	-0.799378	0.276021	0.449608	0.261704	0.772429	0.01618	0.0038	1	1		D R03BA Glucocorticoids	A	p6m
C08CA	1103	215	2217	323	-0.235303	0.116931	-0.0408012	0.127772	0.96002	0.747284	1.23332	0.04426	0.7495	1	0		D C08CA Dihydropyridine derivatives [DG:DG01928]	A	p6m
S01EE	1298	20	2505	35	-0.689225	0.350195	-0.498962	0.378345	0.607161	0.28917	1.27484	0.04913	0.1873	1	0		D S01EE Prostaglandin analogues	A	p6m
N05CD	1281	37	2520	20	1.04536	0.324247	0.0742729	0.43338	1.0771	0.460517	2.51923	0.001275	0.8639	-1	0	-1	D N05CD Benzodiazepine derivatives	A	p1yr
N05CD	145	25	3656	32	2.47269	0.358087	1.81211	0.560092	6.12336	2.04215	18.3608	5.84e-12	0.001225	-1	-1	0	D N05CD Benzodiazepine derivatives	B	p1yr
N05CD	1281	37	391787	1355	1.99186	0.186355	0.842579	0.227845	2.32235	1.48588	3.6297	1.162e-26	0.0002173	-1	-1	0	D N05CD Benzodiazepine derivatives	C	p1yr
N05CD	145	25	391787	1355	3.39524	0.25767	1.83454	0.393124	6.26222	2.89801	13.5319	1.218e-39	3.064e-06	-1	-1	0	D N05CD Benzodiazepine derivatives	D	p1yr
N05CD	3801	57	391787	1355	1.54929	0.150211	0.908218	0.167496	2.4799	1.78591	3.44356	6.129e-25	5.887e-08	-1	-1	0	D N05CD Benzodiazepine derivatives	E	p1yr
N05CD	3801	57	26745	232	0.835438	0.168887	0.771423	0.173366	2.16284	1.53975	3.03809	7.586e-07	8.63e-06	-1	-1	0	D N05CD Benzodiazepine derivatives	F	p1yr
N05CD	1281	37	26745	232	1.33806	0.202337	0.884051	0.23417	2.42069	1.52969	3.83065	3.833e-11	0.0001602	-1	-1	0	D N05CD Benzodiazepine derivatives	G	p1yr
N05CD	145	25	26745	232	2.82946	0.278514	1.84278	0.397955	6.31405	2.89436	13.7741	3.334e-24	3.663e-06	-1	-1	0	D N05CD Benzodiazepine derivatives	H	p1yr
N05CD	145	25	3651	37	2.32297	0.349408	-0.0198934	0.394106	0.980303	0.452678	2.12291	3.384e-11	0.9597	-1	0	-1	D N05CD Benzodiazepine derivatives	A	p2yr
N05CD	145	25	3651	37	2.32297	0.349408	1.69906	0.557212	5.4688	1.83418	16.3058	3.384e-11	0.00231	-1	-1	0	D N05CD Benzodiazepine derivatives	B	p2yr
N05CD	1280	38	391336	1806	1.72554	0.184676	0.767256	0.212838	2.15385	1.41921	3.26877	9.361e-21	0.0003123	-1	-1	0	D N05CD Benzodiazepine derivatives	C	p2yr
N05CD	145	25	391336	1806	3.16187	0.256399	1.64512	0.366757	5.18164	2.52512	10.6329	6.196e-35	7.273e-06	-1	-1	0	D N05CD Benzodiazepine derivatives	D	p2yr
N05CD	3796	62	391336	1806	1.30731	0.144412	0.773371	0.156445	2.16706	1.59479	2.94467	1.401e-19	7.68e-07	-1	-1	0	D N05CD Benzodiazepine derivatives	E	p2yr
N05CD	3796	62	26695	282	0.670373	0.160828	0.663016	0.165891	1.94064	1.40195	2.68631	3.078e-05	6.438e-05	-1	-1	0	D N05CD Benzodiazepine derivatives	F	p2yr
N05CD	1280	38	26695	282	1.12976	0.198443	0.694663	0.225536	2.00303	1.28737	3.11654	1.26e-08	0.002072	-1	-1	0	D N05CD Benzodiazepine derivatives	G	p2yr
N05CD	145	25	26695	282	2.66421	0.275246	1.74001	0.386425	5.6974	2.67139	12.1511	4.007e-22	6.733e-06	-1	-1	0	D N05CD Benzodiazepine derivatives	H	p2yr
N05CD	1273	45	2511	29	0.951213	0.278324	0.54432	0.310898	1.72344	0.936858	3.17042	0.0006382	0.08006	-1	0	-1	D N05CD Benzodiazepine derivatives	A	p5yr
N05CD	143	27	3641	47	2.33358	0.335468	1.98402	0.459512	7.27191	2.95384	17.9023	4.093e-12	1.617e-05	-1	-1	0	D N05CD Benzodiazepine derivatives	B	p5yr
N05CD	1273	45	390217	2925	1.43875	0.167833	0.852435	0.178923	2.34535	1.65161	3.33049	1.016e-17	1.896e-06	-1	-1	0	D N05CD Benzodiazepine derivatives	C	p5yr
N05CD	143	27	390217	2925	2.89449	0.245785	1.86818	0.314589	6.47651	3.49592	11.9983	5.223e-32	2.879e-09	-1	-1	0	D N05CD Benzodiazepine derivatives	D	p5yr
N05CD	3784	74	390217	2925	0.962554	0.129447	0.601716	0.135755	1.82525	1.39883	2.38165	1.041e-13	9.324e-06	-1	-1	0	D N05CD Benzodiazepine derivatives	E	p5yr
N05CD	3784	74	26562	415	0.422827	0.142098	0.415845	0.145718	1.51565	1.13909	2.01669	0.002926	0.004323	-1	-1	0	D N05CD Benzodiazepine derivatives	F	p5yr
N05CD	1273	45	26562	415	0.908996	0.178206	0.64021	0.196834	1.89688	1.28969	2.78993	3.404e-07	0.001145	-1	-1	0	D N05CD Benzodiazepine derivatives	G	p5yr
N05CD	143	27	26562	415	2.41605	0.260279	1.85674	0.328093	6.4028	3.36577	12.1802	1.775e-20	1.536e-08	-1	-1	0	D N05CD Benzodiazepine derivatives	H	p5yr
N05CD	145	25	3663	25	2.6501	0.376001	1.88433	0.642816	6.58192	1.86644	23.2109	2.141e-12	0.003395	-1	-1	0	D N05CD Benzodiazepine derivatives	B	p6m
N05CD	1285	33	392415	727	2.46549	0.202529	1.13957	0.264655	3.12542	1.86051	5.2503	4.362e-34	1.664e-05	-1	-1	0	D N05CD Benzodiazepine derivatives	C	p6m
N05CD	145	25	392415	727	4.1464	0.260948	2.14474	0.439068	8.53979	3.61169	20.1922	7.774e-57	1.036e-06	-1	-1	0	D N05CD Benzodiazepine derivatives	D	p6m
N05CD	3808	50	392415	727	2.05805	0.164518	1.21878	0.192354	3.38307	2.32048	4.93222	6.725e-36	2.358e-10	-1	-1	0	D N05CD Benzodiazepine derivatives	E	p6m
N05CD	3808	50	26799	178	0.937352	0.185749	0.816487	0.19483	2.26254	1.54436	3.31468	4.529e-07	2.788e-05	-1	-1	0	D N05CD Benzodiazepine derivatives	F	p6m
N05CD	1285	33	26799	178	1.42278	0.220419	0.858827	0.264732	2.36039	1.40486	3.96583	1.101e-10	0.001179	-1	-1	0	D N05CD Benzodiazepine derivatives	G	p6m
N05CD	145	25	26799	178	3.12685	0.283817	2.02922	0.433805	7.60812	3.25092	17.8053	3.626e-28	2.915e-06	-1	-1	0	D N05CD Benzodiazepine derivatives	H	p6m
N05CF	1201	117	2401	139	0.333138	0.14851	0.159524	0.15984	1.17295	0.857395	1.60465	0.02494	0.3183	-1	0	-1	D N05CF Benzodiazepine related drugs	A	p5yr
C10AA	895	423	291331	101811	-0.239738	0.0740346	-0.327508	0.077955	0.720717	0.618599	0.839693	0.001203	2.655e-05	1	1		D C10AA HMG CoA reductase inhibitors [DG:DG01660]	C	p6m
C09AA	1132	186	347068	46074	-0.291268	0.0986432	-0.219421	0.102667	0.802984	0.656624	0.981967	0.00315	0.03258	1	1		D C09AA ACE inhibitors, plain [DG:DG01501]	C	p6m
N06AX	153	17	3511	177	0.738046	0.323361	0.0834921	0.367587	1.08708	0.528774	2.23486	0.02252	0.8203	-1	0	-1	D N06AX Other antidepressants	B	p1yr
N06AX	153	17	25496	1481	0.839419	0.294559	-0.0490086	0.333954	0.952173	0.494813	1.83227	0.004379	0.8833	-1	0	-1	D N06AX Other antidepressants	H	p1yr
N06AX	151	19	25176	1801	0.686109	0.285981	-0.28879	0.333156	0.74917	0.389928	1.43938	0.01644	0.386	-1	0	-1	D N06AX Other antidepressants	H	p2yr
N06AX	139	31	3374	314	0.798287	0.265624	0.25996	0.309663	1.29688	0.706691	2.37995	0.00267	0.4012	-1	0	-1	D N06AX Other antidepressants	B	p5yr
N06AX	1163	155	373122	20020	0.533557	0.105323	0.0570171	0.111534	1.05867	0.850794	1.31735	4.066e-07	0.6092	-1	0	-1	D N06AX Other antidepressants	C	p5yr
N06AX	139	31	373122	20020	1.2776	0.243683	0.211683	0.268337	1.23576	0.730337	2.09094	1.582e-07	0.4302	-1	0	-1	D N06AX Other antidepressants	D	p5yr
N06AX	3513	345	373122	20020	0.366144	0.0648509	0.0790234	0.0677146	1.08223	0.947721	1.23583	1.644e-08	0.2432	-1	0	-1	D N06AX Other antidepressants	E	p5yr
N06AX	1163	155	24590	2387	0.211998	0.107263	-0.000970204	0.114802	0.99903	0.797728	1.25113	0.04812	0.9933	-1	0	-1	D N06AX Other antidepressants	G	p5yr
N06AX	139	31	24590	2387	0.928435	0.244686	0.0132702	0.283033	1.01336	0.581881	1.76479	0.0001483	0.9626	-1	0	-1	D N06AX Other antidepressants	H	p5yr
N06DA	3789	69	391006	2136	1.14687	0.156353	0.649392	0.164079	1.91438	1.38792	2.64054	2.219e-13	7.565e-05	-1	-1	0	D N06DA Anticholinesterases	E	p1yr
N06DA	3789	69	26651	326	0.702633	0.16404	0.445298	0.174069	1.56095	1.10973	2.19566	1.847e-05	0.01053	-1	-1	0	D N06DA Anticholinesterases	F	p1yr
N06DA	1286	32	26651	326	0.768362	0.229357	0.361575	0.244129	1.43559	0.889647	2.31655	0.000809	0.1386	-1	0	-1	D N06DA Anticholinesterases	G	p1yr
N06DA	159	11	26651	326	1.07584	0.38985	0.712569	0.424136	2.03922	0.888022	4.6828	0.005791	0.09296	-1	0	-1	D N06DA Anticholinesterases	H	p1yr
N06DA	154	16	3622	66	0.87177	0.366504	0.261419	0.43019	1.29877	0.558777	3.01875	0.01743	0.5434	-1	0	-1	D N06DA Anticholinesterases	B	p2yr
N06DA	1276	42	390838	2304	1.42312	0.199903	0.729403	0.212808	2.07384	1.36657	3.14716	1.089e-12	0.0006092	-1	-1	0	D N06DA Anticholinesterases	C	p2yr
N06DA	154	16	390838	2304	1.70193	0.353333	0.781473	0.366495	2.18469	1.06519	4.48075	1.459e-06	0.03298	-1	-1	0	D N06DA Anticholinesterases	D	p2yr
N06DA	3776	82	390838	2304	1.30192	0.143249	0.7319	0.154601	2.07903	1.53555	2.81486	1.009e-19	2.201e-06	-1	-1	0	D N06DA Anticholinesterases	E	p2yr
N06DA	3776	82	26621	356	0.81547	0.151153	0.498915	0.163412	1.64693	1.19557	2.26871	6.902e-08	0.002267	-1	-1	0	D N06DA Anticholinesterases	F	p2yr
N06DA	1276	42	26621	356	1.00852	0.202482	0.551076	0.222307	1.73512	1.12226	2.68266	6.369e-07	0.01318	-1	-1	0	D N06DA Anticholinesterases	G	p2yr
N06DA	154	16	26621	356	1.4003	0.346871	0.755788	0.402371	2.12929	0.967654	4.68542	5.43e-05	0.06035	-1	0	-1	D N06DA Anticholinesterases	H	p2yr
N06DA	149	21	3600	88	0.888637	0.343423	0.122072	0.411239	1.12984	0.504494	2.53031	0.009702	0.7666	-1	0	-1	D N06DA Anticholinesterases	B	p5yr
N06DA	1264	54	390590	2552	1.56688	0.184715	0.843149	0.208663	2.32367	1.54369	3.49776	2.207e-17	5.33e-05	-1	-1	0	D N06DA Anticholinesterases	C	p5yr
N06DA	149	21	390590	2552	1.93475	0.326826	0.859236	0.368099	2.36136	1.14772	4.85835	3.226e-09	0.01958	-1	-1	0	D N06DA Anticholinesterases	D	p5yr
N06DA	3749	109	390590	2552	1.58106	0.125032	0.99496	0.145744	2.70462	2.03258	3.59885	1.209e-36	8.696e-12	-1	-1	0	D N06DA Anticholinesterases	E	p5yr
N06DA	3749	109	26567	410	1.03532	0.135347	0.683686	0.153204	1.98117	1.46726	2.67506	2.078e-14	8.127e-06	-1	-1	0	D N06DA Anticholinesterases	F	p5yr
N06DA	1264	54	26567	410	1.09287	0.1906	0.541644	0.220082	1.71883	1.11658	2.64591	9.919e-09	0.01386	-1	-1	0	D N06DA Anticholinesterases	G	p5yr
N06DA	149	21	26567	410	1.52884	0.328934	0.833235	0.385458	2.30075	1.08082	4.89764	3.37e-06	0.03065	-1	-1	0	D N06DA Anticholinesterases	H	p5yr
N06DA	3795	63	26683	294	0.677395	0.17206	0.426355	0.181733	1.53167	1.07267	2.18706	8.27e-05	0.01898	-1	-1	0	D N06DA Anticholinesterases	F	p6m
N06DA	1289	29	26683	294	0.732162	0.242502	0.372252	0.258826	1.451	0.873665	2.40985	0.002537	0.1504	-1	0	-1	D N06DA Anticholinesterases	G	p6m
N06DX	1285	33	392134	1008	1.8622	0.237076	1.31736	0.236422	3.73357	2.34899	5.93427	4.011e-15	2.519e-08	-1	-1	0	D N06DX Other anti-dementia drugs	C	p1yr
N06DX	157	13	392134	1008	2.00159	0.401546	1.07478	0.402798	2.92936	1.33018	6.45113	6.208e-07	0.007624	-1	-1	0	D N06DX Other anti-dementia drugs	D	p1yr
N06DX	3792	66	392134	1008	1.81132	0.169377	1.21728	0.177827	3.37799	2.38392	4.78658	1.095e-26	7.642e-12	-1	-1	0	D N06DX Other anti-dementia drugs	E	p1yr
N06DX	3792	66	26775	202	1.08185	0.180291	0.808648	0.194218	2.24487	1.53414	3.28486	1.988e-09	3.141e-05	-1	-1	0	D N06DX Other anti-dementia drugs	F	p1yr
N06DX	1285	33	26775	202	1.19216	0.239716	0.734012	0.263013	2.08342	1.2442	3.48871	6.623e-07	0.005262	-1	-1	0	D N06DX Other anti-dementia drugs	G	p1yr
N06DX	157	13	26775	202	1.59834	0.385208	0.826198	0.442422	2.28462	0.959856	5.43776	3.345e-05	0.06185	-1	0	-1	D N06DX Other anti-dementia drugs	H	p1yr
N06DX	152	18	3628	60	1.12669	0.37235	0.551857	0.439956	1.73647	0.732922	4.11414	0.002496	0.2098	-1	0	-1	D N06DX Other anti-dementia drugs	B	p2yr
N06DX	1278	40	392070	1072	2.07689	0.215879	1.1823	0.236772	3.26188	2.05082	5.18812	6.581e-22	5.934e-07	-1	-1	0	D N06DX Other anti-dementia drugs	C	p2yr
N06DX	152	18	392070	1072	2.54518	0.347995	1.29331	0.372409	3.64484	1.75664	7.56266	2.601e-13	0.0005151	-1	-1	0	D N06DX Other anti-dementia drugs	D	p2yr
N06DX	3780	78	392070	1072	2.0019	0.154956	1.29445	0.172378	3.64899	2.60282	5.11565	3.574e-38	5.953e-14	-1	-1	0	D N06DX Other anti-dementia drugs	E	p2yr
N06DX	3780	78	26760	217	1.25134	0.166329	0.925058	0.183569	2.52201	1.7599	3.61416	5.488e-14	4.699e-07	-1	-1	0	D N06DX Other anti-dementia drugs	F	p2yr
N06DX	1278	40	26760	217	1.36943	0.219339	0.869353	0.249298	2.38537	1.46333	3.88837	4.341e-10	0.0004888	-1	-1	0	D N06DX Other anti-dementia drugs	G	p2yr
A02BC	2870	988	17691	9286	-0.321774	0.0432595	-0.264929	0.0456138	0.76726	0.701641	0.839017	1.047e-13	6.381e-09	1	1		D A02BC Proton pump inhibitors [DG:DG01646]	F	p6m
G03CA	3747	111	25869	1108	-0.461743	0.0988763	-0.448354	0.0992976	0.638678	0.525723	0.775904	3.026e-06	6.347e-06	1	1		D G03CA Natural and semisynthetic estrogens, plain	F	p6m
N03AX	3643	215	25019	1958	-0.379523	0.0882784	-0.33588	0.0911552	0.714709	0.597771	0.854523	1.72e-05	0.0002294	1	1		D N03AX Other antiepileptics	F	p6m
M01AE	3731	127	25776	1201	-0.387976	0.0952035	-0.192977	0.0989936	0.824501	0.679085	1.00105	4.608e-05	0.05126	1	0		D M01AE Propionic acid derivatives	F	p6m
N02AX	3788	70	26227	750	-0.579729	0.155182	-0.447845	0.157151	0.639004	0.469603	0.869513	0.0001875	0.004378	1	1		D N02AX Other opioids	F	p6m
C07AB	3460	398	22972	4005	-0.24745	0.0692913	-0.211429	0.0699444	0.809427	0.70573	0.92836	0.000356	0.002506	1	1		D C07AB Beta blocking agents, selective	F	p6m
L02AE	3845	13	26718	259	-1.24323	0.377281	-1.22627	0.37778	0.293385	0.139913	0.615202	0.0009845	0.001172	1	1		D L02AE Gonadotropin releasing hormone analogues	F	p6m
R05DA	3756	102	25940	1037	-0.370875	0.11652	-0.312646	0.11839	0.731509	0.580019	0.922567	0.001459	0.008275	1	1		D R05DA Opium alkaloids and derivatives	F	p6m
H03AA	3607	251	24575	2402	-0.222705	0.0728647	-0.196609	0.0734259	0.821512	0.711395	0.948673	0.002242	0.007418	1	1		D H03AA Thyroid hormones	F	p6m
A12AX	3565	293	24103	2874	-0.22265	0.074327	-0.192306	0.0755564	0.825054	0.711486	0.956751	0.002742	0.01093	1	1		D A12AX Calcium, combinations with vitamin D and/or other drugs	F	p6m
N06DX	152	18	26760	217	2.0089	0.336014	1.30274	0.406132	3.67938	1.65981	8.15624	2.279e-09	0.00134	-1	-1	0	D N06DX Other anti-dementia drugs	H	p2yr
N06DX	152	18	3622	66	1.04357	0.368647	0.324673	0.448235	1.38358	0.574572	3.33168	0.004667	0.4689	-1	0	-1	D N06DX Other anti-dementia drugs	B	p5yr
N06DX	1275	43	391994	1148	2.08901	0.211467	1.13923	0.240514	3.12437	1.95001	5.00598	5.182e-23	2.173e-06	-1	-1	0	D N06DX Other anti-dementia drugs	C	p5yr
N06DX	152	18	391994	1148	2.4619	0.35453	0.963684	0.407806	2.62134	1.17868	5.82974	3.814e-12	0.01812	-1	-1	0	D N06DX Other anti-dementia drugs	D	p5yr
N06DX	3774	84	391994	1148	2.05092	0.149202	1.20578	0.174761	3.33936	2.37086	4.7035	5.511e-43	5.223e-12	-1	-1	0	D N06DX Other anti-dementia drugs	E	p5yr
N06DX	3774	84	26742	235	1.28762	0.159658	0.793949	0.181974	2.21211	1.54848	3.16017	7.593e-16	1.287e-05	-1	-1	0	D N06DX Other anti-dementia drugs	F	p5yr
N06DX	1275	43	26742	235	1.38189	0.213716	0.802637	0.246679	2.23142	1.37594	3.61879	1.023e-10	0.00114	-1	-1	0	D N06DX Other anti-dementia drugs	G	p5yr
N06DX	152	18	26742	235	1.91524	0.339382	0.984712	0.422884	2.67704	1.16864	6.1324	1.684e-08	0.01989	-1	-1	0	D N06DX Other anti-dementia drugs	H	p5yr
N06DX	1287	31	392296	846	2.01047	0.239665	1.48955	0.253607	4.43512	2.69795	7.29082	4.932e-17	4.271e-09	-1	-1	0	D N06DX Other anti-dementia drugs	C	p6m
N06DX	157	13	392296	846	2.26782	0.391042	1.45146	0.439239	4.26934	1.80501	10.0982	6.659e-09	0.0009516	-1	-1	0	D N06DX Other anti-dementia drugs	D	p6m
C10AA	895	423	17425	9552	-0.422274	0.0757922	-0.255445	0.0816074	0.774571	0.660076	0.908927	2.549e-08	0.001749	1	1		D C10AA HMG CoA reductase inhibitors [DG:DG01660]	G	p6m
A02BC	925	393	17691	9286	-0.353462	0.0724149	-0.42157	0.0767821	0.656016	0.564358	0.76256	1.061e-06	4.043e-08	1	1		D A02BC Proton pump inhibitors [DG:DG01646]	G	p6m
C09AA	1132	186	22656	4321	-0.386733	0.100173	-0.263659	0.107894	0.768236	0.621801	0.949156	0.0001133	0.01454	1	1		D C09AA ACE inhibitors, plain [DG:DG01501]	G	p6m
H03AA	1237	81	24575	2402	-0.40879	0.13289	-0.391854	0.135357	0.675803	0.518321	0.881133	0.002099	0.003795	1	1		D H03AA Thyroid hormones	G	p6m
C09CA	1208	110	24281	2696	-0.330825	0.122655	-0.267176	0.129373	0.765539	0.594073	0.986494	0.006997	0.03892	1	1		D C09CA Angiotensin II receptor blockers, plain [DG:DG01495]	G	p6m
C07AB	1132	186	22972	4005	-0.271937	0.107139	-0.107219	0.112294	0.898329	0.720853	1.1195	0.01115	0.3397	1	0		D C07AB Beta blocking agents, selective	G	p6m
S01EE	1298	20	26322	655	-0.72335	0.291172	-0.580927	0.296207	0.55938	0.313014	0.999654	0.01299	0.04986	1	1		D S01EE Prostaglandin analogues	G	p6m
C08CA	1103	215	22493	4484	-0.229813	0.0929402	-0.0622292	0.0966118	0.939668	0.777561	1.13557	0.01342	0.5195	1	0		D C08CA Dihydropyridine derivatives [DG:DG01928]	G	p6m
S01ED	1309	9	26576	401	-0.94924	0.406913	-0.736141	0.411592	0.478959	0.213765	1.07315	0.01967	0.0737	1	0		D S01ED Beta blocking agents	G	p6m
G04CB	1286	32	26132	845	-0.520371	0.235326	-0.435996	0.238098	0.646621	0.405482	1.03116	0.02702	0.06709	1	0		D G04CB Testosterone-5-alpha reductase inhibitors	G	p6m
N06DX	3794	64	392296	846	1.98234	0.170065	1.52359	0.17762	4.58867	3.23963	6.49947	2.155e-31	9.705e-18	-1	-1	0	D N06DX Other anti-dementia drugs	E	p6m
N06DX	3794	64	26791	186	1.13874	0.182636	0.906594	0.195839	2.47587	1.68664	3.63441	4.576e-10	3.684e-06	-1	-1	0	D N06DX Other anti-dementia drugs	F	p6m
N06DX	1287	31	26791	186	1.2275	0.244718	0.866763	0.268404	2.3792	1.4059	4.0263	5.308e-07	0.001242	-1	-1	0	D N06DX Other anti-dementia drugs	G	p6m
N06DX	157	13	26791	186	1.70669	0.38147	1.14185	0.441277	3.13257	1.31907	7.43932	7.708e-06	0.00967	-1	-1	0	D N06DX Other anti-dementia drugs	H	p6m
R03AC	1163	155	377701	15441	0.887777	0.117335	0.134976	0.129924	1.14451	0.887212	1.47642	3.851e-14	0.2989	-1	0	-1	D R03AC Selective beta-2-adrenoreceptor agonists	C	p6m
R03AC	3524	334	377701	15441	0.732918	0.0718787	0.293391	0.0763675	1.34097	1.15455	1.55748	2.068e-24	0.0001221	-1	-1	0	D R03AC Selective beta-2-adrenoreceptor agonists	E	p6m
R05DA	1228	90	2440	100	0.46921	0.174488	0.169744	0.192894	1.185	0.811848	1.72967	0.007196	0.3789	-1	0	-1	D R05DA Opium alkaloids and derivatives	A	p1yr
R05DA	1265	53	2491	49	0.815773	0.233271	0.303885	0.260997	1.35511	0.812351	2.26052	0.0004757	0.2444	-1	0	-1	D R05DA Opium alkaloids and derivatives	A	p6m
R06AB	1264	54	26329	648	0.367576	0.177686	0.304182	0.181452	1.35552	0.94983	1.93448	0.03859	0.09367	-1	0	-1	D R06AB Substituted alkylamines	G	p5yr
R06AE	1218	100	2470	70	0.71409	0.183338	0.366719	0.208848	1.44299	0.958154	2.17317	9.99e-05	0.07918	-1	0	-1	D R06AE Piperazine derivatives	A	p1yr
R06AE	151	19	3537	151	0.768432	0.330675	-0.026166	0.399095	0.974173	0.445469	2.13037	0.02019	0.9477	-1	0	-1	D R06AE Piperazine derivatives	B	p1yr
R06AE	1218	100	383627	9515	0.86723	0.122908	0.42643	0.129644	1.53178	1.18807	1.97492	1.718e-12	0.001005	-1	-1	0	D R06AE Piperazine derivatives	C	p1yr
R06AE	151	19	383627	9515	1.31078	0.291426	0.241675	0.322971	1.27338	0.676151	2.39813	6.867e-06	0.4543	-1	0	-1	D R06AE Piperazine derivatives	D	p1yr
R06AE	1218	100	25795	1182	0.522702	0.1272	0.387648	0.133352	1.47351	1.13459	1.91367	3.98e-05	0.003652	-1	-1	0	D R06AE Piperazine derivatives	G	p1yr
R06AE	151	19	25795	1182	0.95249	0.295079	0.236711	0.327819	1.26707	0.666422	2.4091	0.001248	0.4703	-1	0	-1	D R06AE Piperazine derivatives	H	p1yr
R06AE	1187	131	377479	15663	0.635152	0.109411	0.275862	0.114072	1.31767	1.05368	1.6478	6.433e-09	0.01559	-1	-1	0	D R06AE Piperazine derivatives	C	p2yr
R06AE	144	26	377479	15663	1.04758	0.265748	0.26716	0.296701	1.30625	0.730252	2.33657	8.081e-05	0.3679	-1	0	-1	D R06AE Piperazine derivatives	D	p2yr
R06AE	1187	131	25101	1876	0.293454	0.112732	0.194982	0.11745	1.21529	0.965387	1.52988	0.009243	0.0969	-1	0	-1	D R06AE Piperazine derivatives	G	p2yr
R06AE	144	26	25101	1876	0.647218	0.269822	0.189696	0.302715	1.20888	0.667884	2.1881	0.01646	0.5309	-1	0	-1	D R06AE Piperazine derivatives	H	p2yr
R06AE	1236	82	2487	53	0.78664	0.207561	0.213655	0.242304	1.2382	0.769971	1.99115	0.000153	0.378	-1	0	-1	D R06AE Piperazine derivatives	A	p6m
R06AE	154	16	3569	119	0.868473	0.355728	-0.466186	0.461635	0.627391	0.253787	1.55098	0.01468	0.3126	-1	0	-1	D R06AE Piperazine derivatives	B	p6m
R06AE	1236	82	387786	5356	1.20902	0.136767	0.575172	0.148935	1.77744	1.32746	2.37995	9.611e-19	0.0001125	-1	-1	0	D R06AE Piperazine derivatives	C	p6m
R06AE	154	16	387786	5356	1.74171	0.310323	0.378514	0.375839	1.46011	0.698989	3.05002	1.995e-08	0.3139	-1	0	-1	D R06AE Piperazine derivatives	D	p6m
R06AE	3723	135	26169	808	0.292746	0.1075	0.310079	0.110277	1.36353	1.09848	1.69253	0.006469	0.004929	-1	-1	0	D R06AE Piperazine derivatives	F	p6m
R06AE	1236	82	26169	808	0.705623	0.141976	0.51755	0.150526	1.67791	1.24921	2.25374	6.734e-07	0.0005863	-1	-1	0	D R06AE Piperazine derivatives	G	p6m
R06AE	154	16	26169	808	1.23704	0.313463	0.391912	0.362899	1.47981	0.726593	3.01383	7.955e-05	0.2802	-1	0	-1	D R06AE Piperazine derivatives	H	p6m
S01AA	159	11	3629	59	1.03959	0.459017	0.319734	0.531292	1.37676	0.485823	3.90156	0.02358	0.5473	-1	0	-1	D S01AA Antibiotics	B	p1yr
S01AA	160	10	3658	30	1.62513	0.5029	0.608876	0.611711	1.83836	0.554086	6.09939	0.001242	0.3196	-1	0	-1	D S01AA Antibiotics	B	p6m
S01AA	160	10	391960	1182	2.54143	0.407871	1.30579	0.487689	3.69062	1.41898	9.59892	4.641e-10	0.007417	-1	-1	0	D S01AA Antibiotics	D	p6m
S01AA	160	10	26725	252	1.61986	0.425452	1.01103	0.479859	2.74844	1.07303	7.0398	0.0001407	0.03513	-1	-1	0	D S01AA Antibiotics	H	p6m
S02AA	152	18	3571	117	0.830777	0.355713	0.580434	0.397708	1.78681	0.819298	3.89688	0.01957	0.1445	-1	0	-1	D S02AA Antiinfectives	B	p5yr
S02AA	152	18	382352	10790	0.993516	0.298696	0.80463	0.313184	2.23587	1.21022	4.13076	0.0008805	0.01019	-1	-1	0	D S02AA Antiinfectives	D	p5yr
S02AA	152	18	25964	1013	0.803302	0.307636	0.687669	0.326542	1.98907	1.04878	3.77239	0.009027	0.03522	-1	-1	0	D S02AA Antiinfectives	H	p5yr
D01AX	1182	136	2397	143	0.334781	0.144086	0.145087	0.155378	1.15614	0.852531	1.56787	0.02021	0.3505	-1	0	-1		A	p5yr
D01AX	1182	136	24916	2061	0.252102	0.108105	0.161195	0.111744	1.17491	0.943812	1.4626	0.01971	0.1492	-1	0	-1		G	p5yr
D01AX	1285	33	26618	359	0.532533	0.214271	0.287637	0.222758	1.33327	0.861587	2.06319	0.01295	0.1966	-1	0	-1		G	p6m
