# Supplementary figures and images for: Exploring Drugs and Vaccines Associated with Altered Risks and Severity of COVID-19: A UK Biobank Cohort Study of All ATC Level-4 Drug Categories Reveals Repositioning Opportunities
Source: MDPI journal article supplement (doi:10.3390/pharmaceutics13091514), 2021-09-18

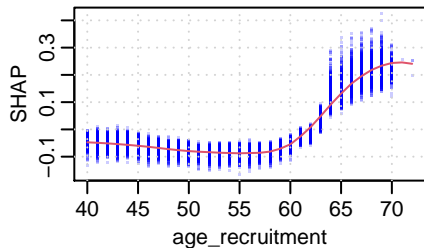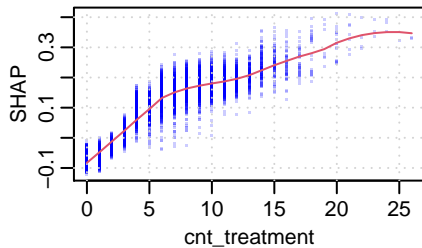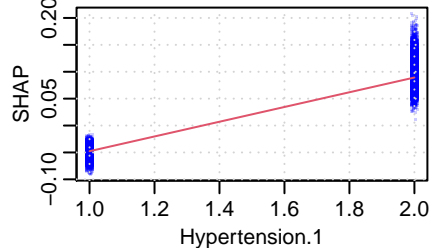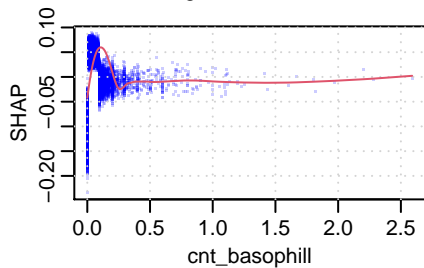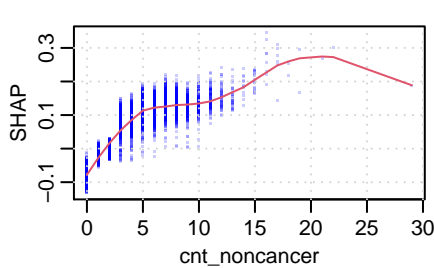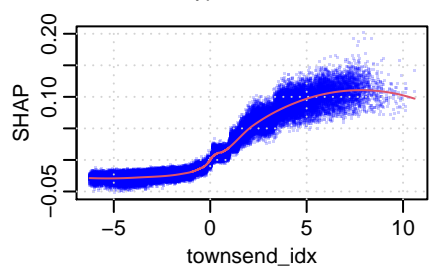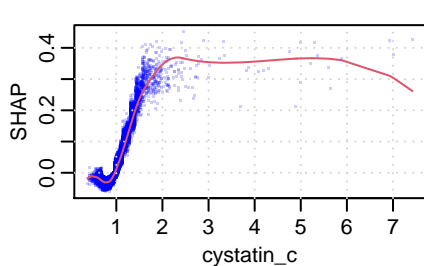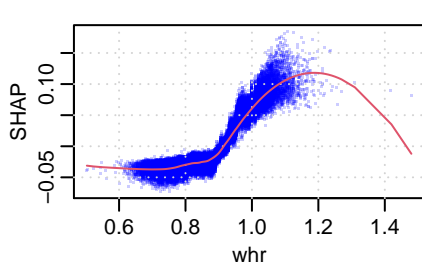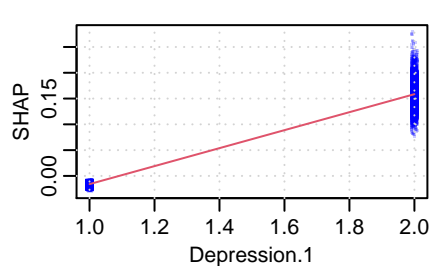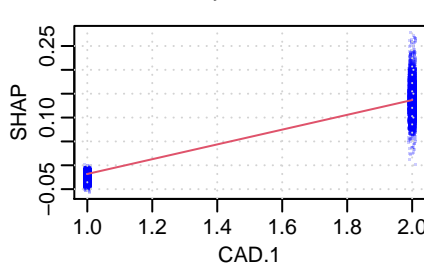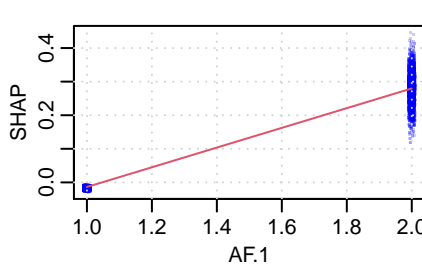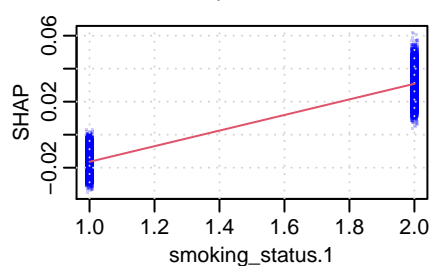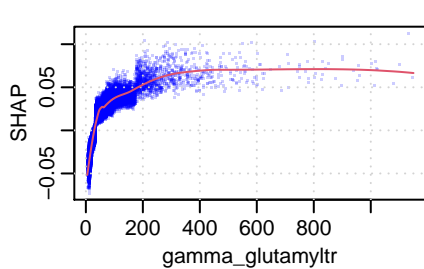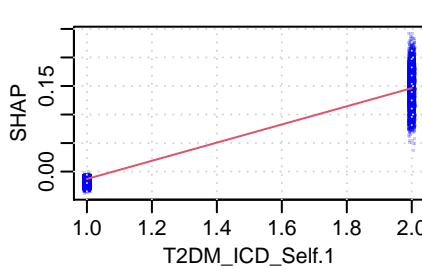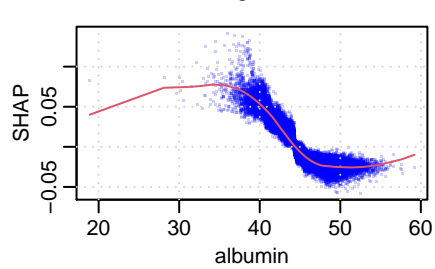

Supplement: s1 [file s1]
